# Supplementary material for: Covid-19: virology, variants, and vaccines
Source: PubMed Central journal article supplement — BMJ Med. 2022 Apr 1;1(1):e000040. doi: 10.1136/bmjmed-2021-000040 (PMC9951271; doi:10.1136/bmjmed-2021-000040), 2022-04-01
Supplement: bmjmed-2021-000040.draft_revisions.pdf [file bmjmed-2021-000040.draft_revisions.pdf]

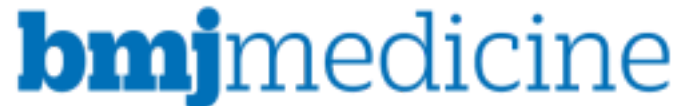

BMJ Medicine is committed to open peer review. As part of this commitment, we make the peer review history of every article we publish publicly available.

When an article is published we post the peer reviewers' comments and the authors' responses online. We also post the versions of the paper that were used during peer review. These are the versions that the peer review comments apply to.

The versions of the paper that follow are the versions that were submitted during the peer review process. They are not the versions of record or the final published versions. They should not be cited or distributed as the published version of this manuscript.

BMJ Medicine is an open access journal and the full, final, typeset and author-corrected version of record of the manuscript is available on our site with no access controls, subscription charges or pay-per-view fees (<http://bmjmedicine.bmj.com>).

If you have any questions on BMJ Medicine's open peer review process please email [info.bmjmedicine@bmj.com](mailto:info.bmjmedicine@bmj.com)

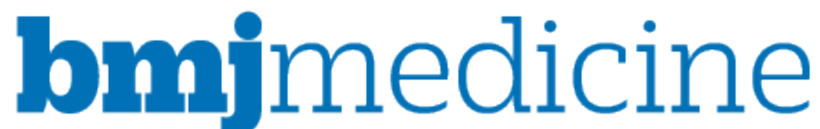**COVID-19: Virology, variants, and vaccines**

|                               |                                                                                                                                                                                                                                                                                                  |
|-------------------------------|--------------------------------------------------------------------------------------------------------------------------------------------------------------------------------------------------------------------------------------------------------------------------------------------------|
| Journal:                      | <i>BMJ Medicine</i>                                                                                                                                                                                                                                                                              |
| Manuscript ID                 | bmjmed-2021-000040                                                                                                                                                                                                                                                                               |
| Article Type:                 | Specialist review                                                                                                                                                                                                                                                                                |
| Date Submitted by the Author: | 29-Oct-2021                                                                                                                                                                                                                                                                                      |
| Complete List of Authors:     | Young, Megan; Imperial College London, Faculty of Medicine<br>Crook, Harry; Imperial College London, Faculty of Medicine<br>Scott, Janet; University of Glasgow, Centre for Virus Research<br>Edison, Paul; Imperial College London, Faculty of Medicine; Cardiff University, School of Medicine |
| Keywords:                     | Covid-19, Virology                                                                                                                                                                                                                                                                               |
|                               |                                                                                                                                                                                                                                                                                                  |

SCHOLARONE™  
Manuscripts

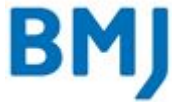

I, the Submitting Author has the right to grant and does grant on behalf of all authors of the Work (as defined in the below author licence), an exclusive licence and/or a non-exclusive licence for contributions from authors who are: i) UK Crown employees; ii) where BMJ has agreed a CC-BY licence shall apply, and/or iii) in accordance with the terms applicable for US Federal Government officers or employees acting as part of their official duties; on a worldwide, perpetual, irrevocable, royalty-free basis to BMJ Publishing Group Ltd ("BMJ") its licensees and where the relevant Journal is co-owned by BMJ to the co-owners of the Journal, to publish the Work in this journal and any other BMJ products and to exploit all rights, as set out in our [licence](#).

The Submitting Author accepts and understands that any supply made under these terms is made by BMJ to the Submitting Author unless you are acting as an employee on behalf of your employer or a postgraduate student of an affiliated institution which is paying any applicable article publishing charge ("APC") for Open Access articles. Where the Submitting Author wishes to make the Work available on an Open Access basis (and intends to pay the relevant APC), the terms of reuse of such Open Access shall be governed by a Creative Commons licence – details of these licences and which [Creative Commons](#) licence will apply to this Work are set out in our licence referred to above.

Other than as permitted in any relevant BMJ Author's Self Archiving Policies, I confirm this Work has not been accepted for publication elsewhere, is not being considered for publication elsewhere and does not duplicate material already published. I confirm all authors consent to publication of this Work and authorise the granting of this licence.

1  
2  
3 **COVID-19: Virology, variants, and vaccines**  
4

5 Megan Young<sup>1†</sup>, Harry Crook<sup>1†</sup>, Janet Scott<sup>2</sup>, Paul Edison<sup>1,3,\*</sup>  
6  
7

8 <sup>1</sup> Faculty of Medicine, Imperial College London, London, UK.

9 <sup>2</sup> Medical Research Council-University of Glasgow Centre for Virus Research, University of Glasgow,  
10 UK

11 <sup>3</sup> School of Medicine, Cardiff University, Cardiff, UK.  
12  
13

14 † Both authors contributed equally to the manuscript  
15  
16

17 \*Corresponding author:

18 Dr Paul Edison, MD, MRCP, PhD, FRCP, FRCPI,

19 Clinical Senior Lecturer and Professor

20 Clinical Senior Lecturer, Imperial College London and Honorary Professor, Cardiff University, UK

21 Division of Neurology, Faculty of Medicine, Imperial College London

22 Level 2, Commonwealth Building,

23 Hammersmith Campus, Imperial College London,

24 Du Cane Road, London, W12 ONN, UK  
25  
26  
27

28 Tel: +442075941081

29 E-mail: paul.edison@imperial.ac.uk  
30  
31  
32

33 No authors have any competing interests.  
34  
35  
36  
37  
38  
39  
40  
41  
42  
43  
44  
45  
46  
47  
48  
49  
50  
51  
52  
53  
54  
55  
56  
57  
58  
59  
60

## **Abstract**

Objectives – In this review, we aim to provide an overview of the severe acute respiratory syndrome 2 (SARS-CoV-2) virus covering viral transmission, genetic susceptibility along with the structure of the virus and different mutations. We outline how certain mutations of SARS-CoV-2 variants may increase transmissibility and disease severity. We also aim to examine the current state of vaccine development, highlighting the effectiveness of vaccines along with giving evidence for the use of boosters.

Design – This review was performed by searching for relevant articles within PubMed and Embase databases, as well as preprint databases MedRxiv and BioRxiv, due to the novelty and rapidly evolving nature of the field. Further manual searching for additional articles and data was performed.

Results - A total of 227 articles were included in the final manuscript. The SARS-CoV2 virus is highly pathogenic to humans, which infects host cells by binding its Spike protein with the angiotensin-converting enzyme-2 receptor and replicates using host cell machinery. Certain SARS-CoV-2 variants have significantly increased transmissibility and disease severity. The WHO currently report four VOC, two VOI, and fifteen VUM. Currently, there are 23 approved vaccines in use in 194 countries, with seven having gained emergency use listing approval from the WHO. These vaccines have been shown to be tolerable and effective. As of 19th October 2021, there are 194 vaccines in pre-clinical development and 124 in clinical development. There are lessons to be learned from this pandemic and previous ones, in order to be better prepared for the next one.

## **1. Introduction**

There are seven coronaviruses known to infect humans, which all belong to the alpha- and beta- coronavirus subgroups, including the common coronaviruses 229E (alpha), NL63 (alpha), OC43 (beta), and HKU1 (beta). (1). Over the last three decades, three notable beta-coronaviruses, severe acute respiratory syndrome coronavirus (SARS-CoV) in 2002, Middle East respiratory syndrome coronavirus (MERS-CoV) in 2011, and most recently, severe acute respiratory syndrome 2 (SARS-CoV-2) in 2019, have emerged and caused severe respiratory illness resulting in debilitating disease and worldwide fatalities. SARS-CoV-2 infection has caused more than 4.8 million deaths in approximately 18 months and caused a multisystem illness in several million people (2). The pathogen responsible for the current Coronavirus 2019 (COVID-19) pandemic is SARS-CoV-2. The SARS-CoV-2 virus genome shares 96% similarity with the bat coronavirus BatCoV RaTG13 and a 98% amino acid identity to the Pangolin-CoV (3, 4). Clearly, SARS-CoV-2 was able to infect both human and bats, although speculation about the origin of the virus is still debated.

All viruses, including SARS-CoV-2 change and mutate over time, with most changes having little to no impact. However, some changes may alter its pathogenic or transmission potential and could therefore hinder the effectiveness of vaccines and therapeutic strategies. SARS-CoV-2 variants that have a significantly increased level of transmissibility and disease severity have been classified as variants of concern (VOC), while variants that we have a limited knowledge of but may have a greater ability to cause more severe disease than the original strain, are classified as variants of interest (VOI) or variants under monitoring (VUM). As of the 22<sup>nd</sup> October 2021, the WHO has reported four VOC; Alpha, Beta, Gamma, and Delta, two VOI; Lambda and Mu, and fifteen VUM (5). Since the beginning of the COVID-19 pandemic, a worldwide effort to develop effective vaccines to protect against SARS-CoV-2 took shape. As of 17<sup>th</sup> October 2021, there has been 4,887,154 COVID-19-associated deaths worldwide (2), however, as of 20<sup>th</sup> October 2021 there are 23 approved vaccines in use in 194 countries, with seven vaccines having gained emergency use listing approval from the WHO (6).

1  
2  
3  
4  
5  
6  
7  
8  
9  
10  
11  
12  
13  
14  
15  
16  
17  
18  
19  
20  
21  
22  
23  
24  
25  
26  
27  
28  
29  
30  
31  
32  
33  
34  
35  
36  
37  
38  
39  
40  
41  
42  
43  
44  
45  
46  
47  
48  
49  
50  
51  
52  
53  
54  
55  
56  
57  
58  
59  
60

In this review, we provide an overview of the genome and structure of SARS-CoV-2, describing how these elements allow the virus to infect and replicate inside of host cells, before outlining how certain mutations harboured by SARS-CoV-2 variants enhance these abilities. Next, we examine the current state of vaccine development around the world, summarising how effective these vaccines are, and giving evidence for the use of booster doses. Finally, we discuss what important lessons to take from the current pandemic and how we can better prepare for future ones.

## **2. Methods**

We searched PubMed and Embase databases for articles related to the topic of this review. Our search terms included SARS-CoV-2, COVID-19, SARS-CoV, MERS, virology, genome, replication, viral entry, variants, vaccines, and vaccinations. We performed further manual searching for additional articles and data using relevant databases, including who.int, gov.uk, and ecdc.europa.eu/en. Due to the rapidly evolving nature of the literature involving SARS-CoV-2, we also searched preprint databases including MedRxiv and BioRxiv. Studies were selected based on their quality, with large, randomised controlled trials being of greatest interest. Following screening of articles with limited exclusion criteria, due to the novelty of the field, a total of 227 articles are included within the final review.

## **3. Viral transmission, clinical presentation, and genetic susceptibility of COVID-19**

SARS-CoV-2 is predominantly spread via respiratory droplet transmission, spreading from person to person through close contact, coughing, or sneezing. It has been well documented that the virus can also spread through airborne transmission, fomite transmission, and via other modes, such as through biological samples including urine and faeces (7, 8). Once inside the airways, SARS-CoV-2 can directly or indirectly infect ciliated, mucus-secreting, and club cells of bronchial epithelium, type 1 pneumocytes within the lungs, and the conjunctival mucosa (9). The clinical presentation of COVID-19 is non-specific and heterogeneous, but usually mild in severity. Following an incubation period of around 5 days, ranging from 4-14 days, symptoms develop which range from mild to severe disease and, in some cases, can result in death (10). The most common COVID-19 symptoms include fever, cough, dyspnoea, and fatigue (11, 12). Asymptomatic individuals can also test positive for COVID-19 (13, 14).

Several risk factors have been identified that are associated with increased risk of hospitalisation, severe disease, and fatal outcome with COVID-19. Older age (15-17), male sex (18, 19), non-white ethnicity (19, 20), comorbidities such as diabetes, hypertension, and lung disease (16, 21-23), malignancy and immunodeficiency (24-26) have all been associated with a greater severity of COVID-19. The host genetic background is also thought to have an influence on the susceptibility of infection and severity of disease caused by SARS-CoV-2, possibly explaining the broad spectrum of clinical manifestations that can develop in seemingly similar individuals. A large international study involving more than 46,000 individuals with COVID-19 across 19 countries and six ancestry groups identified 13 loci in the human genome that may be associated with SARS-CoV-2 infection and increased severity of the disease (27). Four loci; SLC6A20, RPL24, ABO, PLEKHA4 were associated with general susceptibility to SARS-CoV-2 and nine; LZTFL1, FOXP4, TMEM65, OAS1, KANSL1, TAC4, DPP9, RAVR1, and IFNAR2 were associated with increased risk of severe disease (27). Two genome wide association studies (GWAS) across Europe, the United States (US) and United Kingdom (UK) have identified a gene cluster on chromosome three (chr3p21.31) as being strongly associated with susceptibility and severity of COVID-19 (28, 29). Rs11385942 at locus 3p21.31, rs657152 at locus

1  
2  
3 9q34.2, and ABO rs9411378 were associated with increased susceptibility to COVID-19, while LZTFL1  
4 rs13078854 was associated with increased susceptibility and a greater disease severity (28, 29).  
5 Additionally, research highlights the crucial role angiotensin-converting enzyme 2 (ACE2) and  
6 transmembrane protease serine 2 (TMPRSS2) polymorphisms play in SARS-CoV-2 viral entry (30).  
7 Increased ACE2 receptor levels have been associated with risk factors of COVID-19 including smoking  
8 and increasing age (31). It would therefore be entirely plausible that variants of ACE2 and increased  
9 ACE2 receptor levels are associated with increased susceptibility and disease severity. A recent  
10 comparative genetic analysis of approximately 81,000 human genomes suggested possible  
11 associations of ACE2 and TMPRSS2 genetic polymorphisms with COVID-19 susceptibility and severity  
12 (Hou et al., 2020 (32)). This study identified 63 potentially deleterious variants in ACE2 and 68  
13 deleterious variants in TMPRSS2. Specifically, they found that 39% and 54% of deleterious variants in  
14 ACE2 occur in African/African-American and Non-European populations, respectively (32). The  
15 differential polymorphisms across ethnic populations may explain why certain ethnic groups are more  
16 susceptible to severe COVID-19 infection.  
17  
18  
19  
20  
21  
22  
23

#### 24 **4. Virology of SARS-CoV-2**

25 SARS-CoV-2 is a positive-stranded ribonucleic acid (RNA) virus belonging to Coronaviridae  
26 family and the Nidovirales order. These viruses, which appear as crownlike structures, have genomes  
27 ranging from 25kb to 32kb, making them the largest known RNA viruses and are thought to primarily  
28 infect vertebrates (33, 34). SARS-CoV-2 belongs to the beta genus of the coronaviruses and has a  
29 genome varying from 29.8kb to 29.9kb in size (35). Human coronaviruses (HCoV) genomes consist of  
30 a variable number of open reading frames (ORFs), which is a sequence of nucleotide triplets, that are  
31 read as codons specifying amino acids, which contain no stop codons. Following the typical 5'-3' order,  
32 the beginning two-thirds of the SARS-CoV-2 genome contains two ORFs, ORF1a and ORF1b which,  
33 inside the host cell, are translated at the rough endoplasmic reticulum into polyprotein 1a (pp1a) and  
34 polyprotein 1ab (pp1ab), respectively (35). These polyproteins are cleaved into 16 non-structural  
35 proteins (nsp); nsp1-11, from pp1a and nsp12-16, from pp1ab. The proteolytic release of nsp1 occurs  
36 rapidly, which enables it to interfere with translation processes of the host cell by inducing cellular  
37 mRNA degradation (36-38). Nsp2-16 contain the replication and transcription complex (RTC) of the  
38 virus and are thought to harbour multiple enzymes with many functions including, proteases, helicase,  
39 polymerase, exo- and endo-nuclease, N7- and 2'O-methyltransferases, and de-ubiquitination enzymes  
40 (39, 40). The final third of HCoV genomes contain genes that encode structural and accessory proteins.  
41 The four major structural proteins encoded by this region of the genome are the nucleocapsid (N),  
42 membrane (M), envelope (E), and spike glycoprotein (S) proteins (41, 42). The N protein is associated  
43 with the viral RNA genome and is involved in RNA synthesis regulation and may also interact with the  
44 M protein during viral budding (34, 43). The M protein is important for viral assembly, it contains a  
45 short N-terminal domain that projects onto the external surface of the envelope and a long internal C  
46 terminus (34). The E protein function is largely unknown; however it spans the envelope and, along  
47 with the N and M proteins, is required for viral assembly and release (42). Lastly, the S protein gives  
48 coronaviruses their characteristic spikes that compose their crownlike appearance. This protein  
49 projects through the viral envelope, is heavily glycosylated, and regulates host cell membrane  
50 receptor binding and fusion of the viral and cellular membrane (44). The functions of the eleven  
51 accessory proteins encoded within the one-third closest to the 3' end of the SARS-CoV-2 genome are  
52 not fully understood. These accessory proteins are encoded by the ORF3a, ORF3b, ORF3c, ORF3d,  
53  
54  
55  
56  
57  
58  
59  
60

1  
2  
3 ORF6, ORF7a, ORF7b, ORF8, ORF9b, ORF9c, and ORF10 genes. Some of these proteins, including  
4 ORF3b, ORF6, ORF7a and ORF8 are important interferon antagonists and hence impair the host cell  
5 immune response (45-48), while ORF3a may promote virus release (49) and is involved in apoptosis  
6 of host cells through caspase-3 activation (50). ORF9b and ORF9c are known to suppress the host  
7 antiviral response by interacting host cell organelles (51-53), while a clear understanding of the  
8 functions of ORF3c, ORF7b, and ORF10 remains elusive (54). **Figure 1** (A and B) outlines the genome  
9 and structure of SARS-CoV-2.  
10

11  
12 The S protein, which is composed of two functionally distinct subunits (S1 and S2), is  
13 essential for viral entry into host cells. The N-terminal S1 domain of the protein contains the receptor-  
14 binding domain (RBD) that directly interacts with the host cell and therefore determines the tropism  
15 and pathogenicity of the virus (55). The C-terminal S2 domain, meanwhile, causes the host and viral  
16 membranes to fuse and allow for entry of the viral genome into the host cell (56). The RBD of SARS-  
17 CoV-2 contains the structural information required for the S protein to interact with host ACE2  
18 receptors, the primary receptor that SARS-CoV-2 utilises for cell entry (57). Following binding between  
19 the S glycoprotein and the host cell receptor, host cell proteases cleave the S protein which results in  
20 the release of the S2 domain, allowing for fusion and cell entry (58). **Figure 1** (C and D) demonstrate  
21 the structure and function of the S protein.  
22

23  
24  
25 TMPRSS2 is a host cell protease that plays an important role in activating the SARS S protein  
26 and facilitating fusion of viral and cell membranes (59), while TMPRSS2 has also been shown to play a  
27 role in the spread of the virus in the airways of SARS-CoV animal models (59). Host cell cathepsin L has  
28 also been demonstrated to play a role in SARS-CoV-2 entry into the host cell, with it thought to cleave  
29 the S protein and enhance viral entry (60). Indeed, a clinically approved protease inhibitor has been  
30 shown to block SARS-CoV-2 cell entry (61).  
31

32  
33 Moreover, the ACE2 receptor has been found to be expressed in numerous cell types throughout the  
34 human body, including in the lungs, the oral and nasal mucosa, the heart, gastrointestinal tract,  
35 kidneys, liver, spleen, brain, and endothelial cells of the blood vessels (62), highlighting the widespread  
36 infection that SARS-CoV-2 can inflict. **Figure 2** depicts the mechanism by which SARS-CoV-2 gains entry  
37 into and replicates inside host cells, and overviews the host cell immune response.  
38

#### 39 40 **4.1 Other human coronaviruses**

41  
42 HCoVs have been characterised since the 1960s (63) and, more recently, have been the group  
43 of viruses responsible for three large outbreaks that have resulted in illness and death throughout the  
44 world. The first HCoV outbreak, caused by SARS-CoV, began in Foshan city, Guangdong Province, China  
45 in November 2002 (64) and became global in 2003, with a worldwide mortality rate of 10%, although  
46 only 8098 cases were reported (65, 66). The genome of SARS-CoV-2 is 80% similar to SARS-CoV (67),  
47 however, SARS-CoV-2 has a higher reproduction number, which highlights its increased  
48 transmissibility (68). A furin cleavage site that is present in SARS-CoV-2 has been shown to facilitate S  
49 protein priming and to improve the efficiency of the spread and virulence of SARS-CoV-2 in  
50 comparison to other beta coronaviruses, which lack this cleavage site (69, 70). Moreover, compared  
51 with SARS-CoV, SARS-CoV-2 binds to the ACE2 receptor an estimated two-four times more strongly  
52 (71). The second HCoV outbreak was caused by Middle East Respiratory Syndrome (MERS-CoV). MERS-  
53 CoV was first reported in 2012 in Jeddah, Saudi Arabia (64) and has since been detected in 27  
54 countries, resulting in 858 known deaths due to the infection (72). SARS-CoV-2 shares only 50% genetic  
55 similarity with MERS-CoV (70) while, unlike SARS-CoV-2, MERS-CoV binds to dipeptidyl-peptidase 4  
56 (DPP-4) in order to gain entry to human host cells (73). It is thought that the SARS-CoV virus originated  
57  
58  
59  
60



1  
2  
3 from Chinese horseshoe bats (74, 75), while the MERS-CoV virus is thought to have been passed to  
4 humans from dromedary camels, which acted as an intermediate host from its bat origin (76, 77). The  
5 genome of SARS-CoV-2 has been reported to be more than 80% identical to previous human  
6 coronaviruses (78) with better sequence identity to SARS-CoV than MERS CoV (79). However, SARS-  
7 CoV-2 has a little homology with SARS-CoV in the regions of ORF8, ORF3B, ORF10 and S proteins (80,  
8 81). Two other beta coronaviruses, HCoV-HKU1 and HCoV-OC43, and two alpha coronaviruses HCoV-  
9 229E and HCoV-NL63 are known to infect humans, however these usually only cause mild respiratory  
10 infections in humans (70, 82).  
11  
12  
13  
14

## 15 **5. Variants of SARS-CoV-2**

16 Most viral mutations have a limited impact on the viruses' effectiveness to infect, replicate,  
17 escape host immunity, and transmit, however, certain mutations may give a viral strain a competitive  
18 advantage and, through natural selection, give it the ability to become dominant. Although RNA  
19 viruses usually have higher rates of mutation compared to DNA viruses, a mutation correcting enzyme  
20 encoded by coronaviruses reduces the number of mutations that are made during replication (83).  
21 During the emergence and spread of SARS-CoV-2, the virus will have mutated numerous times, with  
22 estimates suggesting that circulating lineages acquire nucleotide mutations at rates of around one to  
23 two mutations per month (84).  
24  
25

26 The WHO have been tracking and monitoring possible mutations and variants since the  
27 COVID-19 pandemic began in order to identify variants of concern. Certain variants that have  
28 appeared during the COVID-19 pandemic have a significantly increased level of transmissibility and  
29 disease severity; these have been termed variants of concern (VOC). Meanwhile, variants that we have  
30 a limited knowledge of but may have a greater ability to cause more severe disease than the original  
31 strain, are classified as variants of interest (VOI) or variants under monitoring (VUM). The full working  
32 definitions of VOC, VOI and VUM can be found on the WHO 'tracking SARS-CoV-2 variants' website  
33 (5). As of the 22<sup>nd</sup> October 2021, the WHO has reported four VOC; Alpha, Beta, Gamma, and Delta,  
34 two VOI; Lambda and Mu, and fifteen VUM (**Table 1**). Globally as of the 19<sup>th</sup> October 2021, the Alpha  
35 variant has been reported in 196 countries; the Beta variant has been reported in 145 countries; the  
36 Gamma variant has been reported in 99 countries; and the Delta variant has been reported in 193  
37 countries (85).  
38  
39  
40  
41  
42

### 43 **5.1 Variants of concern**

#### 44 **5.1.1 Alpha**

45 The Alpha SARS-CoV-2 variant, of the B.1.1.7 Pango lineage, was first documented in the UK  
46 in September 2020 and classified as a VOC on 18<sup>th</sup> December 2020 (5, 86) and, as of 19<sup>th</sup> October 2021,  
47 has been reported in 196 countries (85). This variant contains eight mutations in the S gene, three of  
48 which may have potential biological effects. First, the S protein residue 501 is a key contact residue  
49 within the RBD, which makes the N501Y mutation that the Alpha variant harbours a notable one. The  
50 N501 residue in the RBD of the S protein forms a portion of the binding loop in the contact region of  
51 the ACE2 receptor, forms a hydrogen bond with the Y41 residue of the ACE2 receptor, and stabilises  
52 the ACE2 K353 residue (87-89). It is widely believed that the N501Y mutation increases the binding  
53 affinity of the RBD to the ACE2 receptor (90), while this mutation has also been associated with an  
54 increase in infectivity and virulence in mice (91). Next, the S protein residue 681 is located immediately  
55 adjacent to the 682-685 furin cleavage site, at the interface of the S1 and S2 domains (92). The S1/S2  
56 furin cleavage site is not found in coronaviruses closely related to SARS-CoV-2 and this site has been  
57  
58  
59  
60

1  
2  
3 demonstrated to promote entry into respiratory epithelial cells and increase transmissibility (93-95).  
4 The P681H mutation found in the Alpha variant of SARS-CoV-2 may enhance the abilities of the furin  
5 cleavage site by making it less acidic and, therefore, allowing the site to be more effectively recognised  
6 and cleaved by furin and therefore, enhance transmissibility (96, 97). This variant also harbours a  
7 D614G mutation which has been shown to increase SARS-CoV-2 binding affinity to the ACE2 receptor  
8 and increase infectivity (98). Additionally, the Alpha variant contains a two amino acid deletion at the  
9 sites 69-70 in the S protein, which is a recurrent deletion frequently observed in the N-terminal  
10 domain of the S protein that may enhance the ability of the virus to escape antibody detection (99,  
11 100). Other mutations have been identified in the Alpha SARS-CoV-2 variant, however, these are likely  
12 to have limited or no effect on the efficacy of the virus (101). In February 2021, genetic sequencing  
13 found viruses of the B.1.1.7 lineage with the added mutation of E484K. The E484 residue is located in  
14 the RBD and variants with the E484K mutation were found to be more resistant to neutralising  
15 vaccine-elicited and monoclonal antibodies compared to the B.1.1.7 lineage without the E484K  
16 mutation, suggesting it may threaten the efficacy of vaccines (102). Fortunately, this variant failed to  
17 become the dominant strain, with a total of only 46 confirmed and probably cases of this variant  
18 detected in the UK (103).

19  
20  
21  
22  
23  
24 Several studies have explored the epidemiology of the Alpha variant. In Madrid, Spain, the  
25 probability of admission to an intensive care unit (ICU) was twice as high in patients infected with the  
26 Alpha variant compared to those infected with the original strain, , the Alpha variant quickly became  
27 the dominant strain within four months, and led to an increase in disease burden as a result (104).  
28 Meanwhile, in Cannes, France, being infected with the Alpha variant was associated with a 3.8-fold  
29 higher risk of transfer to an ICU or death in comparison to the older viral strain (105). During the third  
30 COVID-19 wave in Ontario, Canada, where 91% of infections were caused by the Alpha variant, the  
31 risk of both hospitalisation (adjusted odds ratio (OR) =1.57) and death (adjusted OR=1.52) was higher  
32 compared to infections with wild-type infections (106). A similar trend was seen in Alberta, Canada  
33 (106). Overall, the Alpha variant has proven to be approximately 50-70% more transmissible and  
34 increase the risk of hospitalisation and death by around 30-60% compared to the original strain (107-  
35 112).

36  
37  
38  
39 The Alpha variant has been shown to have a minimal impact on the neutralising activity of  
40 current vaccines, however (113, 114), while the risk of reinfection remained similar for this variant as  
41 with previous ones (115). On 3<sup>rd</sup> September 2021, the European Centre for Disease Prevention and  
42 Control (ECDC) reclassified the Alpha variant from a VOC to a 'de-escalated variant' based on at least  
43 one of the following criteria; the variant is no longer circulating, had circulated for a long period  
44 without affecting the global epidemiological situation, and evidence demonstrates that it is not  
45 associated with any concerning properties (116). The Alpha variant B.1.1.7 with the additional E484K  
46 mutation has also been deescalated by the ECDC (116).

### 50 51 **5.1.2 Beta**

52 The Beta SARS-CoV-2 variant, of the B.1.351 Pango lineage, was first documented in South  
53 Africa in May 2020 (5) and has been reported in 145 countries, as of 19<sup>th</sup> October 2021 (85). The ECDC  
54 state that the Beta variant contains five S protein mutations of interest; N501Y, E484K, K417N, D614G,  
55 and A701V. Homogenously to the Alpha variant, the Beta variants contain the S protein mutations  
56 N501Y and E484K, which have been found to increase ACE2 receptor binding affinity (90), increase  
57 virulence (91), and have heightened resistance to neutralising antibodies (102). The K417 residue of  
58 the SARS-CoV-2 S protein interacts with the ACE2 receptor by forming a salt bridge with the D30  
59  
60

1  
2  
3 residue of ACE2, across the central contact region (87, 88), however, the K417N mutation appears to  
4 have a limited impact on ACE2 receptor binding (90). The D614 residue is not located within the RBD,  
5 rather it is located between the S1 and S2 subunits. The D614G mutation does change the receptor  
6 binding conformation, however, leading to an increased binding affinity to the ACE2 receptor and an  
7 increase in infectivity (98). This mutation has been shown to increase viral loads, increase  
8 transmissibility, and is associated with infecting younger people, however, it does not increase disease  
9 severity (117, 118). Additionally, D614G mutated SARS-CoV-2 has a greater resistance to  
10 neutralisation by antibodies than the D614 residue expressing virus, as measured using hamster sera  
11 (119). The A701V mutation is located close to the furin cleavage site but has a minimal effect on  
12 transmissibility or antibody resistance (113).

13  
14  
15  
16 In a genomic and epidemiological study conducted in South Africa, it was concluded that the  
17 Beta SARS-CoV-2 variant had a selective advantage over previous variants from its increased  
18 transmissibility and immune escape abilities (120, 121). Another study found that the E484K/N501K  
19 mutations significantly enhanced the binding affinity of the Beta variant and, hence, increased its  
20 transmissibility (122). A retrospective cohort study in the US found that infection with the Beta variant  
21 was associated with an increased hospitalisation risk compared to an infection with a non-VOC, with  
22 a hazard ratio of 2.30 reported (112). Overall, the Beta variant is approximately 25-50% more  
23 transmissible, is associated with a possible increase in risk of hospital mortality and has a resistance  
24 to antibody neutralisation from antibodies created through contact with previous variants (120, 121,  
25 123).

### 30 **5.1.3 Gamma**

31  
32 The Gamma variant belongs to the P.1 Pango lineage and was first reported in November 2020  
33 from travellers returning to Japan from Brazil, and was then later discovered in Brazil (5, 124). Cases  
34 of the Gamma variant have been reported in 99 countries, as of 19<sup>th</sup> October 2021 (85). This variant  
35 contains 11 non-synonymous mutations in the S protein compared to the B.1.1.28 lineage (124), which  
36 Gamma is thought to have evolved from, with K417T, E484K, N501Y, D614G, and H655Y being  
37 classified as S mutations of interest by the ECDC (116). Some of the mutations identified within the  
38 Gamma variant genome are shared with the Alpha and Beta variants. The aforementioned N501Y and  
39 D614G mutations are also present within the Alpha variant and have been demonstrated to increase  
40 ACE2 receptor binding affinity and increase infectivity of the SARS-CoV-2 virus (90, 98). Meanwhile,  
41 the N501Y, K417N/T, and E484K mutation triplet is similarly shared by both Gamma and Beta variants.  
42 The trinity of mutations present in these variants enhances the infectivity and lethality of them, in  
43 comparison to SARS-CoV-2 variants containing the N501Y mutation alone, possibly due to tighter  
44 binding of the viral S protein to the ACE2 receptor as a result of increased electrostatic contribution  
45 (125). Furthermore, as previously mentioned, the N501Y, K417N/T, and E484K mutations all enhance  
46 ACE2 receptor binding and infectivity of the SARS-CoV-2 virus individually. The Gamma variant also  
47 possesses the H655Y mutation, located outside of the RBD in the S protein. This mutation has been  
48 shown to provide enhanced viral escape abilities from multiple human monoclonal antibodies *in vitro*  
49 (126).

50  
51 The Gamma SARS-CoV-2 variant is associated with a heightened transmissibility (122, 123,  
52 127), with one study concluding that it holds a 1.7- to 2.4-fold increased level of transmissibility  
53 compared to previous variants (128). An epidemiological study conducted in Brazil found that the  
54 second local COVID-19 wave, caused by the Gamma variant, was associated with an increased death  
55 rate compared to the first wave. The wave associated with the Gamma variant saw a 13% increase in  
56  
57  
58  
59  
60

1  
2  
3 death rate compared to the first wave, suggesting that the Gamma variant had a greater pathogenicity  
4 and virulence than the original strain (129). A surveillance study that collated data from seven  
5 European countries concluded that the Gamma variant was associated with a higher adjusted odds  
6 ratio for hospitalisation (OR=2.6) and admission to an ICU (OR=2.2) when compared to non-variant  
7 cases (130). In Manaus, Brazil the resurgence of COVID-19, despite high seroprevalence, suggested  
8 that the Gamma variant had a moderate resistance to neutralising antibodies (131) and, while the  
9 E484K, K417N/T, and N501Y mutation triplet present in the Gamma variant may increase ACE2 binding  
10 affinity, this variant has been shown to be significantly less resistant to antibodies, either naturally  
11 acquired or vaccine-induced, compared to other variants containing these mutations, including the  
12 Beta variant (132). This reduced resistance to neutralisation could possibly be due to mutations  
13 outside of the RBD.  
14  
15  
16  
17  
18

#### 19 **5.1.4 Delta**

20 The Delta variant, from the B.1.617.2 lineage, was first documented in India in October 2020  
21 and was later classified as a VOC on 11<sup>th</sup> May 2021 (5). As of 19<sup>th</sup> October 2021, the Delta variant has  
22 been reported in 193 countries (85). The Delta variant has spread around the world rapidly, and is now  
23 the dominant variant in many counties, including the UK (103, 116). Of the S protein mutations of  
24 particular interest, P681H, present in the Alpha variant, and D614G, present within the Alpha, Beta,  
25 and Gamma variants, are also harboured by the Delta variant (116) and will have similar impacts on  
26 ACE2 receptor binding affinity and transmissibility. The Alpha (B.1.1.7 with E484K), Beta, and Gamma  
27 variants all harbour the same mutation in the E484 residue, within the RBD of the SARS-CoV-2 virus.  
28 The Delta variant, meanwhile, harbours the E484Q mutation, which, along with a L452R mutation also  
29 located in the RBD, demonstrates significantly higher affinity for the ACE2 receptor than the wild-type  
30 or the E484K mutation alone (133). Furthermore, the L452R mutation alone is likely to result in greater  
31 RBD-ACE2 receptor binding affinity as well as enhanced escape from neutralising antibodies (134,  
32 135). The T478K mutation is currently unique to the delta variant (136). The position of this mutation  
33 is within the RBD, on the interface between the S protein and the ACE2 receptor when bound. The  
34 amino acid change in this mutation likely increases the electrostatic potential of the S protein to a  
35 more positive surface, while the lysine residue encoded by this mutation has a larger side chain than  
36 the wild-type threonine, therefore may further affect the binding affinity by increasing steric  
37 hindrance (137).  
38  
39  
40  
41  
42

43 The Delta variant is now the dominant strain circulating in the UK (138), US (139), Europe,  
44 and around the world (140), probably due to its increased transmissibility and ability to escape the  
45 host immune response. The mutations present harboured by the Delta variant, especially those within  
46 the RBD, have enhanced the transmissibility of the SARS-CoV-2 virus as a result of increased binding  
47 affinity to the ACE2 receptor (122). It is estimated that the transmissibility of the Delta variant is 97%  
48 greater than that of previous variants, approximately three times that of the Alpha, Beta, and Gamma  
49 variants (123). This, in addition to the higher reproduction number of the Delta variant compared to  
50 others (123), highlights the competitive advantage that this variant has over previous ones and how it  
51 has rapidly become the dominant strain around the world. In addition to its increased transmissibility,  
52 the fast replication rate of the Delta variant may have contributed to its rise to become the dominant  
53 SARS-CoV-2 strain. A study that sequenced the viral samples from a number of participants discovered  
54 that the Delta variant could be detected by PCR test within the first four days from exposure, while  
55 non-Delta variant infections could only be detected after six days. Furthermore, the relative viral loads  
56 of people infected with the Delta variant were 1260 times higher than that of people infected with  
57  
58  
59  
60

1  
2  
3 SARS-CoV-2 viruses from 19A and 19B clades (141). Together, these findings suggest that the Delta  
4 variant replicates faster and more than previous variants. Another study corroborated this, finding  
5 that the relative viral load of those infected with the Delta variant was 2.5-fold higher than the viral  
6 load of those infected with the Beta variant ( $P<0.05$ ) (142). This variant is also thought to be better  
7 equipped at escaping the host immune response. In India, the frequency of post-vaccination infections  
8 was much higher for the Delta variant than infections with the wild-type (B.1) strain (143), while blood  
9 sera samples from individuals who had received one dose of an approved COVID-19 vaccine showed  
10 a minimal amount of neutralisation of the Delta variant (144), demonstrating that this variant is  
11 associated with escape from antibodies. Overall, the combination of increased transmissibility, high  
12 reproduction rate, and enhanced escape from host immunity have contributed to the spread of the  
13 Delta variant and its rise to dominance.  
14

15  
16  
17 In addition to having a higher infectivity, the Delta variant has been associated with an  
18 increased severity of disease. In Scotland, infection with the Delta variant was associated with an  
19 increased risk of hospitalisation (hazard ratio=1.85) compared to infection with the Alpha variant  
20 (145), while in Canada, infections with the Delta variant were associated with a 108% increased risk  
21 for hospitalisation, a 234% increased risk for admission to an ICU, and a 132% increased risk of death,  
22 compared to non-VOC infections (146). A retrospective cohort study conducted in the US concluded  
23 that risk of hospitalisation was higher for those infected with the Delta variant (hazard ratio=2.30)  
24 compared to those infected with a non-VOC variant (112). Lastly, another study demonstrated that the  
25 Delta variant infected and caused the development of symptoms and hospitalisation of significantly  
26 younger people, compared to the B.1 strain, while the risk of death was around 1.8 times higher for  
27 the Delta variant (143).  
28  
29  
30  
31  
32

## 33 **5.2 Variants of interest**

### 34 **5.2.1 Lambda**

35  
36 The Lambda variant belongs to the C.37 lineage, was first documented in Peru in December  
37 2020, and was designated as a VOI on 14<sup>th</sup> June 2021 (5). This variant contains the S protein mutations  
38 D614G, L452Q, and F490S (116). As previously mentioned, the D614 residue of the S protein is located  
39 outside of the RBD, however, the replacement of this by the G614 residue alters the receptor binding  
40 conformation and increases binding affinity to the ACE2 receptor (98). This mutation has been  
41 demonstrated to increase viral loads, transmissibility, and resistance to neutralisation (117-119). The  
42 Lambda variant harbours two novel mutation within the RBD; L452Q and F490S. The L452 residue is  
43 also mutated in the Delta variant which, although the leucine is replaced with arginine rather than  
44 glutamine, results in greater ACE2 receptor binding affinity and enhanced escape from neutralising  
45 antibodies (134, 135). A study demonstrated that the Lambda S protein increases infectivity, an effect  
46 that is solely due to the L452Q mutation (147). This was likely due to an increased binding affinity for  
47 the ACE2 receptor (147). This study also demonstrated that the Lambda variant was resistant to  
48 vaccine-induced antibody neutralisation, an effect that was attributed by the L452Q and F490S  
49 mutations (147). Furthermore, a large-scale study that assessed 506,768 SARS-CoV-2 genome isolates  
50 from patients with COVID-19 and identified the F490S mutation as a high-risk mutation that enhances  
51 vaccine-escape from the host immune response (147).  
52  
53  
54  
55

56  
57 Currently, studies examining the Lambda variant are limited, however one study found that  
58 the infectivity of this variant was higher than the Alpha, Gamma, and D614G containing lineage B  
59 variants (148), suggesting that this variant may hold the potential to spread more rapidly and  
60 effectively than previous ones. The ability of the Lambda variant to escape host immunity is currently

1  
2  
3 controversial. The aforementioned study found that, compared to the wild-type SARS-CoV-2 virus,  
4 neutralisation was decreased by 3.05-fold for the Lambda variant, while for the Gamma and Alpha  
5 variants a 2.33- and 2.03-fold reduction was found, respectively (148). This finding suggests that the  
6 Lambda variant is more resistant to neutralisation than the Gamma and Alpha variants. Contrastingly,  
7 another study concluded that the Lambda variant could be neutralised by monoclonal antibodies and  
8 that current vaccines will continue to be protective against this variant (147).  
9  
10

### 11 12 **5.2.2 Mu**

13 The Mu variant is from the B.1.621 lineage and was first documented in Columbia in January  
14 2021, before receiving designation as a VOI on 30<sup>th</sup> August 2021 (5). This variant contains S protein  
15 mutations also harboured by previous variants, including E484K, N501Y, D614G, and P681H (116),  
16 therefore will provide this variant with similarly increased levels of transmissibility and immune  
17 escapes compared to the wild-type virus. The Mu variant also contains the R346K mutation, which is  
18 a S protein mutation of interest and is located within the RBD (116, 149). The R346K mutation has  
19 been found to induce large binding free energy changes that could potentially disrupt the binding of  
20 antibodies to the S protein and enhance the ability of the Mu variant to escape neutralisation (150).  
21 As mentioned with previous variants, the E484K, N501Y, D614G, and P681H mutations have been  
22 shown to increase transmissibility (90, 91, 96, 98, 117, 118, 122, 125) and neutralisation escape (102,  
23 119) which suggests the Mu SARS-CoV-2 variant is likely to be more infectious than the wild-type virus,  
24 as well as other previous variants.  
25  
26  
27  
28  
29

30 The development and spread of VOI will need to be closely monitored and studied in order to  
31 appreciate their pathogenicity, transmissibility and lethality.  
32  
33

### 34 **5.3 VUM**

35 VUM are defined by the WHO as in section 5.1. There are currently fourteen VUM listed by  
36 the WHO (5), which are described in *table 1*.  
37  
38

## 39 **6. Vaccinations**

40 The COVID-19 pandemic has resulted in detrimental outcomes for health, healthcare systems,  
41 and the economy around the world and has prompted a rapid international search for a safe, effective,  
42 and timely treatment therapy for the SARS-CoV-2 infection and its associated disease. Research from  
43 previous vaccine development highlights that vaccines can induce a strong immune response against  
44 the S protein and, generally, have a significant blocking effect that effectively prevents entry into host  
45 cells (151). In line with previous vaccine development, including for both SARS-CoV and MERS-CoV,  
46 the S protein is a key target for COVID-19 vaccine development (152). Vaccines have been shown to  
47 be highly efficacious in preventing infection and severe disease from SARS-CoV-2. According to the  
48 WHO, the first mass vaccination programme started in early December 2020 (153). As of 20<sup>th</sup> October  
49 2021, there are 23 approved vaccines in use in 194 countries, with seven vaccines having gained  
50 emergency use listing approval from the WHO (6), highlighting their tolerability and effectiveness  
51 (*table 2*). The vaccines that have gained approval from the WHO are mRNA, non-replicating viral  
52 vector, and inactivated virus vaccines. Many more vaccine therapies are currently being developed  
53 and tested, including some that belong to the same class as those already approved, and others such  
54 as saRNA, DNA, and protein subunit vaccines. According to the WHO, as of 19<sup>th</sup> October 2021 there  
55 are 194 vaccines in pre-clinical development and 124 in clinical development (154).  
56  
57  
58  
59  
60

### 6.1 Pfizer/BioNtech - BNT162b2

The BNT162b2 vaccine is an mRNA vaccine developed through a collaborative effort between Pfizer (New York, New York, US) and BioNTech (Mainz, Germany) which gained WHO emergency use listing on 31<sup>st</sup> December 2020 (153). As of 20<sup>th</sup> October 2021, this vaccine has been approved for use in 103 countries (155). BNT162b2 is a lipid nanoparticle-formulated, nucleoside-modified RNA vaccine that encodes the full length of the SARS-CoV-2 S protein which has been modified by two proline mutations to ensure it is locked into the prefusion conformation (80, 156). This vaccine prompts a host immune response that allows the body to create antibodies that bind to the S-protein of invading SARS-CoV-2 viruses and neutralises them. BNT162b2 has been demonstrated to elicit a strong and BNT162b2 elicits a strong and resolute interferon gamma (IFN $\gamma$ ) or interleukin-2 (IL-2) CD8<sup>+</sup> and CD4<sup>+</sup> Th1 cell response (157), while the highest neutralising antibody titres are found between seven and fourteen days after the second vaccine dose (158). In a non-human primate study, BNT162b2 demonstrated a Th-1 biased response which resulted in complete viral clearance from three to ten days post-infection, while neutralising antibody response persisted for up to eight weeks (159).

The BNT162b2 vaccine has been shown to be highly effective at protecting against SARS-CoV-2 infection and severe disease (**table 2**). Two doses of this vaccine are approximately 60-95% effective in preventing SARS-CoV-2 infection, including those caused by VOC.

### 6.2 Oxford-AstraZeneca – AZD1222

The AZD1222 vaccine is given as an intramuscular injection of a non-replicating vector of the chimpanzee adenovirus ChAdOx1, which has been modified to encode the SARS-CoV-2 S protein (160). Developed through a collaborative project between the University of Oxford and AstraZeneca (Cambridge, UK), this vaccine was given WHO emergency use listing on 16<sup>th</sup> February 2021 (153) and has been approved for use in 124 countries, as of 20<sup>th</sup> October 2021 (155). Detection of the S protein expressed by the modified adenovirus has been shown to induce antibody production of predominantly IgG1 and IgG3 subclasses, prompt a Th-1 biased response, and induce a number of other human immune system responses including IFN $\gamma$  and tumour necrosis factor- $\alpha$  (TNF- $\alpha$ ) (133, 161). A study found that one dose of AZD1222 produced a neutralising antibody response in 91% of participants, while a second dose resulted in 100% of participants producing neutralising antibodies (162). The WHO has also listed two versions of this vaccine (AZD1222 and Covishield) for emergency use listing in order to utilise Covishield as part of their worldwide COVAX initiative, which are being produced by the Serum Institute of India and AstraZeneca-SKBio (Republic of Korea) (163).

The AZD1222 vaccine has also been shown to be highly effective in preventing both infection and severe disease as a result of SARS-CoV-2, including VOC (**table 2**). Two doses of this vaccine provide approximately 55-100% protection against infection from SARS-CoV-2.

### 6.3 Johnson & Johnson - Ad26.COV.2.S

Similarly to the University of Oxford/AstraZeneca AZD1222 vaccine, the Ad26.COV.2.S is also a non-replicating adenovirus vector that has been modified to contain the full-length SARS-CoV-2 S protein in a prefusion-stabilised conformation (164). Unlike AZD122, however, this vector was made from the recombinant human adenovirus type 26 by the Janssen pharmaceutical company of Johnson & Johnson (New Brunswick, New Jersey, US) (164). This vaccine was listed for WHO emergency use listing on 12<sup>th</sup> March 2021 (153) and, as of 20<sup>th</sup> October 2021, has been approved for use in 75 countries (155). The SARS-CoV-2 S protein contained in the Ad26.COV.2.S vaccine elicits a host

1  
2  
3 immune response that induces the production of a variety of antibody subclasses, such as IgG, IgM  
4 and IgA, and a number of non-neutralising antibody responses, including activation of CD4+ and CD8+  
5 Th1 cells and production of IFN $\gamma$ , IL-2, and TNF $\alpha$  (164, 165).  
6

7 Johnson & Johnson's Ad26.COV.2.S COVID-19 vaccine only requires a single dose and has also  
8 shown high levels of effectiveness (**table 2**). Being vaccinated with Ad26.COV.2.S provides  
9 approximately 30-85% protection against being infected with SARS-CoV-2, with a longer duration,  
10 such as being vaccinated for longer than 28 days, being associated with a greater vaccine effectiveness than  
11 with being vaccinated for a shorter period of time.  
12  
13

#### 14 **6.4 Moderna – mRNA-1273**

15 The mRNA-1273 vaccine was developed by Moderna (Massachusetts, US), gained WHO  
16 emergency use listing on 30<sup>th</sup> April 2021 (153), and as of 20<sup>th</sup> October 2021, has been approved for  
17 use in 76 countries (155). mRNA-1273 is a lipid-nanoparticle-encapsulated mRNA vaccine expressing  
18 the SARS-CoV-2 S protein that has been prefusion-stabilised (166). The S protein contained in this  
19 vaccine elicits an immune response including antibody production and CD4+ Th1 cell activation (167).  
20 In one non-human primate study, by two days after vaccination, no viral replication in the nose and  
21 limited inflammation or viral genome in the lungs could be detected (168), while in another study,  
22 mRNA-1273 was the top ranked vaccine when assessing the efficacy of 18 COVID-19 vaccines (159). In  
23 humans, neutralising antibody titres have been shown to significantly increase up until around 28 days  
24 following the second dose of the vaccine, and afterwards remain consistently high (169).  
25  
26

27 The mRNA-1273 vaccine has been demonstrated to be highly effective in preventing infection  
28 with, and negative outcomes following SARS-CoV-2 infection (**table 2**). Two doses of the vaccine  
29 confer approximately 50-95% protection against infection from SARS-CoV-2 and its variants.  
30  
31  
32  
33

#### 34 **6.5 Sinopharm - BBIBP-CorV**

35 The Sinopharm BBIBP-CorV COVID-19 vaccine was developed by the Beijing Bio-Institute of  
36 Biological Products, a subsidiary of China National Biotec Group, and was given WHO emergency use  
37 listing on 7<sup>th</sup> May 2021 (153). As of 20<sup>th</sup> October 2021, this vaccine has been approved for use in 67  
38 countries (155). The Sinopharm BIBP vaccine is an inactivated SARS-CoV-2 antigen that is produced in  
39 Vero cells, inactivated by  $\beta$ -propiolactone, and then purified and adsorbed with aluminium hydroxide  
40 (170). The inactivated vaccine is based on the SARS-CoV-2 19nCoV-CDC-Tan-HB02 (HB02) strain (170).  
41 A phase 1/2 clinical trial of this vaccine demonstrated that 100% of participants that received the  
42 vaccine produced a neutralising antibody response by day 42 after the second dose (171), while it has  
43 also been shown that this vaccine induces the production of IgG and IgA antibodies and a IFN $\gamma$  positive  
44 T-cell response (172).  
45  
46

47 Studies have demonstrated that two doses of the BBIBP-CorV vaccine confers a strong  
48 effectiveness against infection and severe disease as a result of SARS-CoV-2 (**table 2**).  
49  
50  
51

#### 52 **6.6 Sinovac - CoronaVac**

53 The Sinovac CoronaVac vaccine was developed by Sinovac Biotech (Beijing, China), was listed  
54 for WHO emergency use listing on 1<sup>st</sup> June 2021 (153), and has been approved for use in 41 countries,  
55 as of 20<sup>th</sup> October 2021 (155). Like the BBIBP-CorV vaccine, this vaccine is a Vero cell-based, aluminium  
56 hydroxide-adjuvanted,  $\beta$ -propiolactone-inactivated vaccine, however, it is based on the SARS-CoV-2  
57 CZ02 strain (173). CoronaVac has been shown to produce an adequate neutralising antibody response  
58  
59  
60



(174), however, this response is lower for infections with VOCs compared to those with the wild type strain (175).

Alike the previous vaccines, CoronaVac provides a strong protection against SARS-CoV-2 related infection, hospitalisation, and death especially after the recommended two doses (**table 2**).

### **6.7 Other approved vaccines**

In addition to the vaccines described above that have received emergency use listing from the WHO, companies around the world have developed, tested and approved vaccines to combat COVID-19. As of 20<sup>th</sup> October 2021, 23 vaccines, including the seven described above, have been approved (6). The remaining 16 approved vaccines consist of a range of vaccine types and are outlined in **table 3**.

### **6.8 Waning immunity and boosters**

Throughout the COVID-19 pandemic, the scientific community has been troubled by the effect that emerging SARS-CoV-2 variants may have on the effectiveness of the vaccine rollout. Indeed, a combination of mutations could lead SARS-CoV-2 to develop an exceptional ability to escape neutralisation by vaccine-induced antibodies, rendering the current vaccine strategy insufficient. Although circulating variants have been shown to decrease the effectiveness of certain vaccines (**table 2**), the current vaccines still confer a robust effectiveness against the current VOC. Another issue is that of waning immunity following administration of a COVID-19 vaccine that brings into question the importance of a booster dose. Indeed, immunity against SARS-CoV-2 following full vaccination has been demonstrated to decrease over time, both in terms of antibody titre and vaccine effectiveness. One study found that the SARS-CoV-2 S antibodies decreased by two-fold and five-fold between 21-41 days and 70 days following the second dose of the BNT162b2 Pfizer/BioNtech vaccine and the AZD1222 Oxford University/AstraZeneca, respectively (176). Contrastingly, a six-month longitudinal observational study demonstrated that neutralising antibody levels did not decrease as much as initially feared, in their cohort of 196 hospital workers (177). However, a systematic review of 150 studies concluded that antibody titres do gradually decrease from around eight weeks post-vaccination but suggested that further evidence is required to fully understand this decline (178). In addition to antibody production, COVID-19 vaccines induce other immune factors, which may also play a role in long-lasting, or the decline of, immunity against COVID-19. Several studies have demonstrated that vaccine effectiveness decreases over time. One such study found that the effectiveness of the BNT162b2 vaccine against SARS-CoV-2 infection decreased from 77.5% at one-month after second dose to 17.3% at six-months after second dose, with a decrease also seen in the effectiveness of the vaccine against severe or fatal infection (179). Other studies have corroborated this finding (180, 181), demonstrating that effectiveness of the BNT162b vaccine weakens over time. Similar waning in immunity against SARS-CoV-2 infection has been seen following full vaccination with the mRNA-1273 vaccine (182). Together, these findings suggest that a booster COVID-19 vaccine dose may be required to regain levels of immunity in some individuals.

As booster programme rollouts are still in their infancy, there is limited evidence on their real-world effects, however, data is beginning to infer the utility of a booster vaccine dose. On 30<sup>th</sup> July 2021, On 30<sup>th</sup> July 2021, Israel was the first country to offer a third dose of the BNT162b2 vaccine to people aged 60 years or older and who had been fully vaccinated for at least five months. Since then, a study has revealed that a third dose was effective, with those receiving the booster dose significantly less likely to be infected with SARS-CoV-2 or be severely ill with the virus, compared to those who did

1  
2  
3 not receive the booster (183). In a phase 2 randomised controlled trial, a third dose of vaccine  
4 significantly increased neutralising antibody titres, which had decreased below the seropositive cut-  
5 off after six to eight months following the prime vaccination regimen (184). Another trial showed that  
6 a third dose of mRNA-1273 or variant-targeting variations of the mRNA-1273 vaccine, administered  
7 six to eight months after the primary series, significantly improved titres of neutralising antibodies,  
8 which were waning before the booster dose was given. Moreover, all boosters were found to increase  
9 neutralisation titres against Beta, Gamma and Delta variants (185). Other studies have corroborated  
10 the findings discussed here with other vaccines (186, 187). Heterologous boosting, whereby a  
11 different vaccine is given from that given in the primary regimen, has been shown to be well tolerated  
12 and induce humoral and cellular responses similar to that of homologous boosting (187-189). There is  
13 increasing evidence that booster doses of COVID-19 vaccines are well tolerated and effective at  
14 boosting immunity and reducing the risk of SARS-CoV-2 infection, therefore, it is likely that many  
15 countries will implement vaccine booster programmes, if they have not already done so. It is still  
16 unclear, however, who will most likely benefit from receiving a booster dose and which sections of  
17 the population will receive it. Furthermore, not all countries are fortunate enough to be in the position  
18 to offer booster vaccines, which highlights the controversy of these programmes and the disparity in  
19 vaccine rollouts around the world.  
20  
21  
22  
23  
24  
25

## 26 **7. Considerations for the future**

27 In recent history, only the 1918 'Spanish flu' pandemic, caused by the H1N1 virus, has resulted  
28 in a greater amount of illness and death than the current COVID-19 pandemic (190). Pandemics are  
29 an unpredictable aspect of nature and it is important that we learn from the current and past  
30 pandemics in order to prepare for future ones. The responsibility of improving pandemic response lies  
31 with policy makers, the medical/scientific community, and the public, and will ultimately require a  
32 collaborative approach. Scientists argue that, globally, we did not learn from the previous SARS-CoV  
33 and MERS-CoV pandemics and were ill-prepared for the COVID-19 pandemic (191). One example of  
34 this ill preparation was the lack of availability of personal protective equipment (PPE) and medical  
35 devices that were vital for protecting healthcare workers and treating patients. Global limited  
36 availability of PPE was a result of many factors, including a sudden increased demand and price, and  
37 severe disruptions to global supply chains. Therefore, a major lesson to take from this pandemic is to  
38 strengthen the capacity to maintain and distribute PPE stockpiles, enforce regulations on PPE, and  
39 remove the motive of profit for purchasing PPE products which will allow the equipment to be  
40 distributed more effectively and supplies to be more regularly available (192).  
41  
42  
43  
44  
45

46 Additionally, the COVID-19 pandemic has highlighted the increased vulnerability of the socio-  
47 economically deprived. Non-white ethnicity, social disadvantage (as measured by education, housing  
48 and income), and unemployment are risk factors for testing positive for COVID-19 (193), while non-  
49 white ethnicity is also associated with COVID-19 related death (20). Financially poorer people are also  
50 more often employed in occupations that do not allow them to work from home, therefore, are more  
51 likely to become unemployed during a global pandemic, which could have negative consequences on  
52 stress and mental health (194). Special consideration should be given for those who are likely to be  
53 most greatly affected by future pandemics.  
54  
55

56 Funding is also essential for the current and future pandemics for immediate response and  
57 secondary factors, such as remote education/working, food availability, and furlough schemes, while  
58 taking into consideration the effect on the economic impact. It is important that governments and  
59 leading scientists work together to identify areas of improvement from the COVID-19 pandemic, which  
60

1  
2  
3 is why inquiries into the handling of it, such as the coronavirus inquiry set to take place in the UK (195),  
4 are welcomed.  
5

6  
7 Moreover, certain aspects of the response to the pandemic have been a huge triumph. The  
8 rapid identification, sequencing and ongoing epidemiological information related to the transmission  
9 and mutation of SARS-CoV-2 have helped to better understand the virus and how it spreads.  
10 Pharmacological developments, such as the gradual improvement of treatment strategies have helped  
11 to reduce the number of people that die from COVID-19, while the expeditious development,  
12 approval, rollout, and effectiveness of vaccines have been an enormous success. With SARS-CoV-2  
13 reinfection likely (196), even after infection and vaccination, policymakers should remain vigilant and  
14 ready to implement prevention and treatment strategies in order to prevent further waves of  
15 infection. Scientific-backed strategy, informed decision-making, and public involvement are three  
16 important steps to improve the control and response to future pandemics.  
17  
18  
19  
20

## 21 **8. Conclusion**

22 COVID-19 remains a debilitating and life-threatening disease. Although the timely  
23 development and rollout of vaccines have assisted in reducing the spread of the virus, it has yet to be  
24 eradicated. With the Delta variant continuing to circulate, and with new variants likely to arise in the  
25 future, we must remain vigilant to reduce the risk of further waves of infection. In this review, we have  
26 provided an overview of SARS-CoV-2, including its genome, structure, and routes of transmission. We  
27 have also outlined the mutations harboured by SARS-CoV-2 variants and how these mutations  
28 enhance the ability of the variants to spread more easily and inflict more severe disease. Lastly, we  
29 discussed the major vaccines that have been developed and administered around the world and  
30 provided evidence supporting the rollout of booster doses.  
31  
32  
33

34 Priority should be focused on maintaining efficacy of vaccines against emerging variants,  
35 monitoring the spread and the emergence of genetic mutations of SARS-CoV-2. Achievement of an  
36 effective vaccination rollout will not only help us get through this pandemic but will better our  
37 response and management of the next one.  
38  
39

## 40 **Research Questions**

- 41 1) How will the SARS-CoV-2 virus mutate, and which mutations will give a competitive advantage  
42 that will allow the virus to inflict severe disease?
- 43 2) How can we keep up with the rapidly changing SARS-CoV-2 environment and ensure vaccines  
44 remain effective?
- 45 3) When should booster doses be given and who should they be given to in order to achieve the  
46 most effective outcome?
- 47 4) How can we learn from the current and past pandemics so that we are better prepared for  
48 the next one?  
49  
50  
51  
52

53 **Patient Involvement:** Patients who had been infected with covid-19 were contacted and requested to  
54 review the initial drafts of this manuscript. The received feedback was mostly positive and assisted in  
55 developing and focusing our review. Final drafts were also reviewed by patients who had had covid-  
56 19 and similar positive feedback was received.  
57  
58  
59  
60

1  
2  
3 **Contributorship statement and guarantor:** MY and HC performed the literature search and drafted  
4 the manuscript. MY and HC revised and finalised the manuscript and are joint-first authors. JS  
5 reviewed and revised the manuscript. PE was responsible for the concept and design of the work. PE  
6 reviewed, revised and finalised the manuscript. PE is the guarantor.  
7  
8

9  
10 **Competing interests:** We have read and understood the BMJ policy on declaration of interests and  
11 declare the following interests: PE was funded by the Medical Research Council and now by Higher  
12 Education Funding Council for England (HEFCE). He has also received grants from Alzheimer's  
13 Research, UK, Alzheimer's Drug Discovery Foundation, Alzheimer's Society, UK, Medical Research  
14 Council, Alzheimer's Association US, Van-Geest foundation, and European Union grants. PE is a  
15 consultant to Roche, Pfizer, and Novo Nordisk. He has received educational and research grants from  
16 GE Healthcare, Novo Nordisk, Piramal Life Science/Life Molecular Imaging, Avid Radiopharmaceuticals  
17 and Eli Lilly. He is a member of the Scientific Advisory Board at Novo Nordisk. None of these were  
18 related to COVID-19  
19  
20  
21

22  
23 **Copyright statement:** The Corresponding Author has the right to grant on behalf of all authors and  
24 does grant on behalf of all authors, an exclusive licence (or non-exclusive for government employees)  
25 on a worldwide basis to the BMJ Publishing Group Ltd to permit this article (if accepted) to be  
26 published in BMJ editions and any other BMJPL products and sub-licenses such use and exploit all  
27 subsidiary rights, as set out in our licence (bmj.com/advice/copyright.shtml)."  
28  
29

### 30 Figure Legends:

31 **Figure 1: Genome and structure of SARS-CoV-2. A) SARS-CoV-2 genome and S protein amino acid**  
32 **composition.** The SARS-CoV-2 genome is approximately 30,000 base pairs (bp) long and consists of  
33 open reading frames (ORF) and elements that are essential for the virus' structure. The spike S protein  
34 is responsible for binding and entry into host cells. SARS-CoV-2 variants of concern (VOC) contain  
35 various S protein non-synonymous mutations that result in amino acid changes in the receptor binding  
36 domain (orange text) and the S1/S2 subunit interface (black text) which have been demonstrated to  
37 enhance transmissibility of the virus. VOC include Alpha ( $\alpha$ ), Beta ( $\beta$ ), Gamma ( $\gamma$ ), and Delta ( $\delta$ ). **B)**  
38 **SARS-CoV-2 structure.** SARS-CoV-2 is a RNA virus that has a crown-like appearance and contains four  
39 major structural proteins: nucleocapsid (N), spike (S), envelope (E), and membrane (M). **C) S and ACE2**  
40 **interaction.** The SARS-CoV-2 S protein directly interacts with human angiotensin-converting enzyme  
41 2 (ACE2) receptors in order to gain entry into host cells. The receptor binding domain (RBD) of the S  
42 protein tightly binds to ACE2. **D) Spike protein structure.** The S protein protrudes out from the main  
43 SARS-CoV-2 bulk and is comprised of two subunits: S1 and S2. S1 contains the RBD which directly  
44 interacts with the human ACE2 receptor, while the S1/S2 interface contains a furin cleavage site which  
45 is cleaved to allow S2 to fuse with the host cell membrane. Both the RBD and the S1/S2 interface  
46 contain transmissibility increasing mutations that are harboured in variants of concern.  
47  
48  
49  
50  
51  
52

53 **Figure 2: Viral entry and host response. A) At the alveolar epithelial cell layer.** Epithelial cells in the  
54 lungs express both angiotensin-converting enzyme 2 (ACE2) receptors and transmembrane protease  
55 serine 2 (TMPRSS2), allowing for infection by SARS-CoV-2. Replication of the virus within these cells  
56 induces an intense immune response that attracts monocytes, T-cells and macrophages and, in some  
57 cases, can result in a cytokine storm. **B) Within nearby blood vessels.** Cytokines produced by the  
58 epithelial cell layer are released into blood vessels supplying the infected tissue, which causes the  
59  
60

recruitment of further immune cells to the area, driving the damaging inflammatory response further. Circulating cytokines also create a systemic inflammatory environment. **C) Adaptive immune response.** Circulating lymphocytes carry viral antigens to lymph nodes and bone marrow to begin the adaptive immune system processes whereby B-cells, and later antibodies, are activated. **D) SARS-CoV-2 host replication.** The SARS-CoV-2 virus utilises the ACE2 receptor and TMPRSS2 to gain entry into human cells. Following release of the viral RNA within the host cell, the virus utilises the host endoplasmic reticulum (ER) and Golgi apparatus to produce and manufacture new viral particles, which are released out of the cell to infect other cells and new hosts.

**Table 1: SARS-CoV-2 variants.** \*first detection worldwide. data from WHO (<https://www.who.int/en/activities/tracking-SARS-CoV-2-variants/>). Zeta (P.2) and Theta (P.3) is no longer considered a variant under monitoring (VUM) and, therefore, has been removed. Epsilon: Former variant of interest (VOI) (designated 5 Mar 2021), downgraded to a VUM 6 Jul 2021. Kappa: Former VOI (designated 4 Apr 2021), downgraded to a VUM 20 Sept 2021. Iota: Former VOI (designated 24 Mar 2021), downgraded to a VUM 20 Sept 2021. Eta: Former VOI (designated 17 Mar 2021), downgraded to a VUM 20 Sept 2021.

**Table 2: Vaccines that have gained WHO emergency use listing.** \*Adjusted for covariates where reported in study. Days/Months refers to days/months since vaccination dose.

**Table 3: COVID-19 vaccines that have been approved around the world that have not gained emergency use listing from the World Health Organisation.**

#### **References:**

1. Centers for Disease Control and Prevention. Human Coronavirus Types. Available from: <https://www.cdc.gov/coronavirus/types.html> [Accessed 15 October 2021].
2. World Health Organisation. Weekly Operational Update on COVID-19 – 18 October 2021. Available from: <https://www.who.int/publications/m/item/weekly-operational-update-on-covid-19--18-october-2021> [Accessed 21 October 2021].
3. Wong MC, Cregeen SJJ, Ajami NJ, Petrosino JF. Evidence of recombination in coronaviruses implicating pangolin origins of nCoV-2019. *BioRxiv* [preprint]. 2020.
4. Yan R, Zhang Y, Li Y, Xia L, Guo Y, Zhou Q. Structural basis for the recognition of SARS-CoV-2 by full-length human ACE2. *Science*. 2020;367(6485):1444-8.
5. World Health Organisation. Tracking SARS-CoV-2 variants. Available from: <https://www.who.int/en/activities/tracking-SARS-CoV-2-variants/> [Accessed 23 October 2021].
6. Covid-19 Vaccine tracker. Approved Vaccines. Available from: <https://covid19.trackvaccines.org/vaccines/approved/> [Accessed 21 October 2021].
7. Chan JF, Yuan S, Kok KH, To KK, Chu H, Yang J, et al. A familial cluster of pneumonia associated with the 2019 novel coronavirus indicating person-to-person transmission: a study of a family cluster. *Lancet*. 2020;395(10223):514-23.

- 1  
2  
3 8. World Health Organisation. Transmission of SARS-CoV-2: implications for infection prevention  
4 precautions. Scientific Brief. Available from: [https://www.who.int/news-](https://www.who.int/news-room/commentaries/detail/transmission-of-sars-cov-2-implications-for-infection-prevention-precautions)  
5 [room/commentaries/detail/transmission-of-sars-cov-2-implications-for-infection-prevention-](https://www.who.int/news-room/commentaries/detail/transmission-of-sars-cov-2-implications-for-infection-prevention-precautions)  
6 [precautions](https://www.who.int/news-room/commentaries/detail/transmission-of-sars-cov-2-implications-for-infection-prevention-precautions) [Accessed 15 October 2021].  
7  
8
- 9 9. Hui KP, Cheung M-C, Perera RA, Ng K-C, Bui CH, Ho JC, et al. Tropism, replication competence,  
10 and innate immune responses of the coronavirus SARS-CoV-2 in human respiratory tract and  
11 conjunctiva: an analysis in ex-vivo and in-vitro cultures. *The Lancet Respiratory Medicine*.  
12 2020;8(7):687-95.  
13
- 14 10. McAloon C, Collins A, Hunt K, Barber A, Byrne AW, Butler F, et al. Incubation period of COVID-  
15 19: a rapid systematic review and meta-analysis of observational research. *BMJ Open*.  
16 2020;10(8):e039652.  
17
- 18 11. Bliddal S, Banasik K, Pedersen OB, Nissen J, Cantwell L, Schwinn M, et al. Acute and persistent  
19 symptoms in non-hospitalized PCR-confirmed COVID-19 patients. *Sci Rep*. 2021;11(1):13153.  
20
- 21 12. Grant MC, Geoghegan L, Arbyn M, Mohammed Z, McGuinness L, Clarke EL, et al. The  
22 prevalence of symptoms in 24,410 adults infected by the novel coronavirus (SARS-CoV-2; COVID-19):  
23 A systematic review and meta-analysis of 148 studies from 9 countries. *PLoS One*.  
24 2020;15(6):e0234765.  
25
- 26 13. Kronbichler A, Kresse D, Yoon S, Lee KH, Effenberger M, Shin JI. Asymptomatic patients as a  
27 source of COVID-19 infections: A systematic review and meta-analysis. *Int J Infect Dis*. 2020;98:180-6.  
28
- 29 14. Arons MM, Hatfield KM, Reddy SC, Kimball A, James A, Jacobs JR, et al. Presymptomatic SARS-  
30 CoV-2 Infections and Transmission in a Skilled Nursing Facility. *N Engl J Med*. 2020;382(22):2081-90.  
31
- 32 15. Zhang JJ, Cao YY, Tan G, Dong X, Wang BC, Lin J, et al. Clinical, radiological, and laboratory  
33 characteristics and risk factors for severity and mortality of 289 hospitalized COVID-19 patients.  
34 *Allergy*. 2021;76(2):533-50.  
35
- 36 16. Wolff D, Nee S, Hickey NS, Marschollek M. Risk factors for Covid-19 severity and fatality: a  
37 structured literature review. *Infection*. 2021;49(1):15-28.  
38
- 39 17. Zhou F, Yu T, Du R, Fan G, Liu Y, Liu Z, et al. Clinical course and risk factors for mortality of  
40 adult inpatients with COVID-19 in Wuhan, China: a retrospective cohort study. *Lancet*.  
41 2020;395(10229):1054-62.  
42
- 43 18. Zhang J, Wang X, Jia X, Li J, Hu K, Chen G, et al. Risk factors for disease severity,  
44 unimprovement, and mortality in COVID-19 patients in Wuhan, China. *Clin Microbiol Infect*.  
45 2020;26(6):767-72.  
46
- 47 19. Ebinger JE, Achamallah N, Ji H, Claggett BL, Sun N, Botting P, et al. Pre-existing traits associated  
48 with Covid-19 illness severity. *PLoS One*. 2020;15(7):e0236240.  
49
- 50 20. Williamson EJ, Walker AJ, Bhaskaran K, Bacon S, Bates C, Morton CE, et al. Factors associated  
51 with COVID-19-related death using OpenSAFELY. *Nature*. 2020;584(7821):430-6.  
52
- 53 21. Li R, Tian J, Yang F, Lv L, Yu J, Sun G, et al. Clinical characteristics of 225 patients with COVID-  
54 19 in a tertiary Hospital near Wuhan, China. *J Clin Virol*. 2020;127:104363.  
55  
56  
57  
58  
59  
60

- 1
  - 2
  - 3
  - 4
  - 5
  - 6
  - 7
  - 8
  - 9
  - 10
  - 11
  - 12
  - 13
  - 14
  - 15
  - 16
  - 17
  - 18
  - 19
  - 20
  - 21
  - 22
  - 23
  - 24
  - 25
  - 26
  - 27
  - 28
  - 29
  - 30
  - 31
  - 32
  - 33
  - 34
  - 35
  - 36
  - 37
  - 38
  - 39
  - 40
  - 41
  - 42
  - 43
  - 44
  - 45
  - 46
  - 47
  - 48
  - 49
  - 50
  - 51
  - 52
  - 53
  - 54
  - 55
  - 56
  - 57
  - 58
  - 59
  - 60
22. Guo L, Shi Z, Zhang Y, Wang C, Do Vale Moreira NC, Zuo H, et al. Comorbid diabetes and the risk of disease severity or death among 8807 COVID-19 patients in China: A meta-analysis. *Diabetes Res Clin Pract.* 2020;166:108346.
23. Feng Y, Ling Y, Bai T, Xie Y, Huang J, Li J, et al. COVID-19 with Different Severities: A Multicenter Study of Clinical Features. *Am J Respir Crit Care Med.* 2020;201(11):1380-8.
24. Tian J, Yuan X, Xiao J, Zhong Q, Yang C, Liu B, et al. Clinical characteristics and risk factors associated with COVID-19 disease severity in patients with cancer in Wuhan, China: a multicentre, retrospective, cohort study. *Lancet Oncol.* 2020;21(7):893-903.
25. Liang W, Guan W, Chen R, Wang W, Li J, Xu K, et al. Cancer patients in SARS-CoV-2 infection: a nationwide analysis in China. *Lancet Oncol.* 2020;21(3):335-7.
26. Vizcarra P, Perez-Elias MJ, Quereda C, Moreno A, Vivancos MJ, Dronda F, et al. Description of COVID-19 in HIV-infected individuals: a single-centre, prospective cohort. *Lancet HIV.* 2020;7(8):e554-e64.
27. Baillie JK, Wilson JF, Bulteel N, Hayward C, Klaric L, Porteous DJ, et al. Mapping the human genetic architecture of COVID-19. *Nature.* 2021.
28. Shelton JF, Shastri AJ, Ye C, Weldon CH, Filshtein-Somnez T, Coker D, et al. Trans-ethnic analysis reveals genetic and non-genetic associations with COVID-19 susceptibility and severity. *MedRxiv [preprint].* 2020.
29. Ellinghaus D, Degenhardt F, Bujanda L, Buti M, Albillos A, Invernizzi P, et al. Genomewide association study of severe covid-19 with respiratory failure/[...]. *New England Journal of Medicine* Boston: Massachusetts Medical Society, 2020, vol 383, no 16. 2020.
30. Hoffmann M, Kleine-Weber H, Schroeder S, Krüger N, Herrler T, Erichsen S, et al. SARS-CoV-2 cell entry depends on ACE2 and TMPRSS2 and is blocked by a clinically proven protease inhibitor. *cell.* 2020;181(2):271-80. e8.
31. Barbry P, Muus C, Luecken M, Eraslan G, Waghray A, Heimberg G, et al. Integrated analyses of single-cell atlases reveal age, gender, and smoking status associations with cell type-specific expression of mediators of SARS-CoV-2 viral entry and highlights inflammatory programs in putative target cells. 2020.
32. Hou Y, Zhao J, Martin W, Kallianpur A, Chung MK, Jehi L, et al. New insights into genetic susceptibility of COVID-19: an ACE2 and TMPRSS2 polymorphism analysis. *BMC medicine.* 2020;18(1):1-8.
33. Payne S. Family Coronaviridae. *Viruses*2017. p. 149-58.
34. Masters PS, Kuo L, Ye R, Hurst KR, Koetzner CA, Hsue B. Genetic and molecular biological analysis of protein-protein interactions in coronavirus assembly. *Adv Exp Med Biol.* 2006;581:163-73.
35. Khailany RA, Safdar M, Ozaslan M. Genomic characterization of a novel SARS-CoV-2. *Gene Rep.* 2020;19:100682.

- 1
- 2
- 3 36. Thoms M, Buschauer R, Ameisemeier M, Koepke L, Denk T, Hirschenberger M, et al. Structural
- 4 basis for translational shutdown and immune evasion by the Nsp1 protein of SARS-CoV-2. *Science*.
- 5 2020;369(6508):1249-55.
- 6
- 7 37. Schubert K, Karousis ED, Jomaa A, Scaiola A, Echeverria B, Gurzeler LA, et al. SARS-CoV-2 Nsp1
- 8 binds the ribosomal mRNA channel to inhibit translation. *Nat Struct Mol Biol*. 2020;27(10):959-66.
- 9
- 10 38. Huang C, Lokugamage KG, Rozovics JM, Narayanan K, Semler BL, Makino S. SARS coronavirus
- 11 nsp1 protein induces template-dependent endonucleolytic cleavage of mRNAs: viral mRNAs are
- 12 resistant to nsp1-induced RNA cleavage. *PLoS Pathog*. 2011;7(12):e1002433.
- 13
- 14 39. Snijder EJ, Decroly E, Ziebuhr J. The Nonstructural Proteins Directing Coronavirus RNA
- 15 Synthesis and Processing. *Adv Virus Res*. 2016;96:59-126.
- 16
- 17 40. V'Kovski P, Gerber M, Kelly J, Pfaender S, Ebert N, Braga Lagache S, et al. Determination of
- 18 host proteins composing the microenvironment of coronavirus replicase complexes by proximity-
- 19 labeling. *Elife*. 2019;8.
- 20
- 21 41. Masters PS. The molecular biology of coronaviruses. *Advances in virus research*. 2006;66:193-
- 22 292.
- 23
- 24 42. Siu Y, Teoh K, Lo J, Chan C, Kien F, Escriou N, et al. The M, E, and N structural proteins of the
- 25 severe acute respiratory syndrome coronavirus are required for efficient assembly, trafficking, and
- 26 release of virus-like particles. *Journal of virology*. 2008;82(22):11318-30.
- 27
- 28 43. Kuo L, Masters PS. Genetic evidence for a structural interaction between the carboxy termini
- 29 of the membrane and nucleocapsid proteins of mouse hepatitis virus. *J Virol*. 2002;76(10):4987-99.
- 30
- 31 44. Hulswit RJ, de Haan CA, Bosch BJ. Coronavirus Spike Protein and Tropism Changes. *Adv Virus*
- 32 *Res*. 2016;96:29-57.
- 33
- 34 45. Konno Y, Kimura I, Uriu K, Fukushi M, Irie T, Koyanagi Y, et al. SARS-CoV-2 ORF3b Is a Potent
- 35 Interferon Antagonist Whose Activity Is Increased by a Naturally Occurring Elongation Variant. *Cell*
- 36 *Rep*. 2020;32(12):108185.
- 37
- 38 46. Kopecky-Bromberg SA, Martinez-Sobrido L, Frieman M, Baric RA, Palese P. Severe acute
- 39 respiratory syndrome coronavirus open reading frame (ORF) 3b, ORF 6, and nucleocapsid proteins
- 40 function as interferon antagonists. *J Virol*. 2007;81(2):548-57.
- 41
- 42 47. Xia H, Cao Z, Xie X, Zhang X, Chen JY, Wang H, et al. Evasion of Type I Interferon by SARS-CoV-2.
- 43 *Cell Rep*. 2020;33(1):108234.
- 44
- 45 48. Wong HH, Fung TS, Fang S, Huang M, Le MT, Liu DX. Accessory proteins 8b and 8ab of severe
- 46 acute respiratory syndrome coronavirus suppress the interferon signaling pathway by mediating
- 47 ubiquitin-dependent rapid degradation of interferon regulatory factor 3. *Virology*. 2018;515:165-75.
- 48
- 49 49. Azad GK, Khan PK. Variations in Orf3a protein of SARS-CoV-2 alter its structure and function.
- 50 *Biochem Biophys Rep*. 2021;26:100933.
- 51
- 52 50. Ren Y, Shu T, Wu D, Mu J, Wang C, Huang M, et al. The ORF3a protein of SARS-CoV-2 induces
- 53 apoptosis in cells. *Cell Mol Immunol*. 2020;17(8):881-3.
- 54
- 55
- 56
- 57
- 58
- 59
- 60



- 1  
2  
3 51. Kreimendahl S, Rassow J. The Mitochondrial Outer Membrane Protein Tom70-Mediator in  
4 Protein Traffic, Membrane Contact Sites and Innate Immunity. *Int J Mol Sci.* 2020;21(19).
- 5  
6 52. Gordon DE, Jang GM, Bouhaddou M, Xu J, Obernier K, White KM, et al. A SARS-CoV-2 protein  
7 interaction map reveals targets for drug repurposing. *Nature.* 2020;583(7816):459-68.
- 8  
9 53. Dominguez Andres A, Feng Y, Campos AR, Yin J, Yang CC, James B, et al. SARS-CoV-2 ORF9c Is  
10 a Membrane-Associated Protein that Suppresses Antiviral Responses in Cells. *BioRxiv [preprint].* 2020.
- 11  
12 54. Redondo N, Zaldivar-Lopez S, Garrido JJ, Montoya M. SARS-CoV-2 Accessory Proteins in Viral  
13 Pathogenesis: Knowns and Unknowns. *Front Immunol.* 2021;12:708264.
- 14  
15 55. Bosch BJ, van der Zee R, de Haan CA, Rottier PJ. The coronavirus spike protein is a class I virus  
16 fusion protein: structural and functional characterization of the fusion core complex. *J Virol.*  
17 2003;77(16):8801-11.
- 18  
19 56. Li F. Structure, Function, and Evolution of Coronavirus Spike Proteins. *Annu Rev Virol.*  
20 2016;3(1):237-61.
- 21  
22 57. Letko M, Marzi A, Munster V. Functional assessment of cell entry and receptor usage for SARS-  
23 CoV-2 and other lineage B betacoronaviruses. *Nat Microbiol.* 2020;5(4):562-9.
- 24  
25 58. Millet JK, Whittaker GR. Host cell proteases: Critical determinants of coronavirus tropism and  
26 pathogenesis. *Virus Res.* 2015;202:120-34.
- 27  
28 59. Glowacka I, Bertram S, Muller MA, Allen P, Soilleux E, Pfefferle S, et al. Evidence that TMPRSS2  
29 activates the severe acute respiratory syndrome coronavirus spike protein for membrane fusion and  
30 reduces viral control by the humoral immune response. *J Virol.* 2011;85(9):4122-34.
- 31  
32 60. Zhao MM, Yang WL, Yang FY, Zhang L, Huang WJ, Hou W, et al. Cathepsin L plays a key role in  
33 SARS-CoV-2 infection in humans and humanized mice and is a promising target for new drug  
34 development. *Signal Transduct Target Ther.* 2021;6(1):134.
- 35  
36 61. Hoffmann M, Kleine-Weber H, Schroeder S, Kruger N, Herrler T, Erichsen S, et al. SARS-CoV-2  
37 Cell Entry Depends on ACE2 and TMPRSS2 and Is Blocked by a Clinically Proven Protease Inhibitor. *Cell.*  
38 2020;181(2):271-80 e8.
- 39  
40 62. Hamming I, Timens W, Bulthuis ML, Lely AT, Navis G, van Goor H. Tissue distribution of ACE2  
41 protein, the functional receptor for SARS coronavirus. A first step in understanding SARS pathogenesis.  
42 *J Pathol.* 2004;203(2):631-7.
- 43  
44 63. Kahn JS, McIntosh K. History and recent advances in coronavirus discovery. *Pediatr Infect Dis*  
45 *J.* 2005;24(11 Suppl):S223-7, discussion S6.
- 46  
47 64. Ge XY, Hu B, Shi ZL. Bat Coronaviruses. *Bats and Viruses.* 2015:127-55.
- 48  
49 65. Lee N, Hui D, Wu A, Chan P, Cameron P, Joynt GM, et al. A major outbreak of severe acute  
50 respiratory syndrome in Hong Kong. *N Engl J Med.* 2003;348(20):1986-94.
- 51  
52 66. Centers for Disease Control and Prevention. Severe Acute Respiratory Syndrome (SARS).  
53 Available from: <https://www.cdc.gov/sars/about/faq.html> [Accessed 05 Oct 2021].
- 54  
55  
56  
57  
58  
59  
60

- 1  
2  
3 67. Zhou P, Yang XL, Wang XG, Hu B, Zhang L, Zhang W, et al. A pneumonia outbreak associated  
4 with a new coronavirus of probable bat origin. *Nature*. 2020;579(7798):270-3.  
5
- 6 68. Liu Y, Gayle AA, Wilder-Smith A, Rocklöv J. The reproductive number of COVID-19 is higher  
7 compared to SARS coronavirus. *J Travel Med*. 2020;27(2).  
8
- 9 69. Coutard B, Valle C, de Lamballerie X, Canard B, Seidah NG, Decroly E. The spike glycoprotein  
10 of the new coronavirus 2019-nCoV contains a furin-like cleavage site absent in CoV of the same clade.  
11 *Antiviral Res*. 2020;176:104742.  
12
- 13 70. Rabaan AA, Al-Ahmed SH, Haque S, Sah R, Tiwari R, Malik YS, et al. SARS-CoV-2, SARS-CoV, and  
14 MERS-COV: A comparative overview. *Infez Med*. 2020;28(2):174-84.  
15
- 16 71. Nguyen HL, Lan PD, Thai NQ, Nissley DA, O'Brien EP, Li MS. Does SARS-CoV-2 Bind to Human  
17 ACE2 More Strongly Than Does SARS-CoV? *J Phys Chem B*. 2020;124(34):7336-47.  
18
- 19 72. World Health Organisation. Middle East respiratory syndrome coronavirus (MERS-CoV).  
20 Available from: [https://www.who.int/health-topics/middle-east-respiratory-syndrome-coronavirus-](https://www.who.int/health-topics/middle-east-respiratory-syndrome-coronavirus-mers#tab=tab_1)  
21 [mers#tab=tab\\_1](https://www.who.int/health-topics/middle-east-respiratory-syndrome-coronavirus-mers#tab=tab_1) [Accessed 05 Oct 2021].  
22
- 23 73. Fehr AR, Perlman S. Coronaviruses: an overview of their replication and pathogenesis.  
24 *Methods Mol Biol*. 2015;1282:1-23.  
25
- 26 74. Lau SK, Woo PC, Li KS, Huang Y, Tsoi HW, Wong BH, et al. Severe acute respiratory syndrome  
27 coronavirus-like virus in Chinese horseshoe bats. *Proc Natl Acad Sci U S A*. 2005;102(39):14040-5.  
28
- 29 75. Li W, Shi Z, Yu M, Ren W, Smith C, Epstein JH, et al. Bats are natural reservoirs of SARS-like  
30 coronaviruses. *Science*. 2005;310(5748):676-9.  
31
- 32 76. van Boheemen S, de Graaf M, Lauber C, Bestebroer TM, Raj VS, Zaki AM, et al. Genomic  
33 characterization of a newly discovered coronavirus associated with acute respiratory distress  
34 syndrome in humans. *mBio*. 2012;3(6).  
35
- 36 77. Meyer B, Muller MA, Corman VM, Reusken CB, Ritz D, Godeke GJ, et al. Antibodies against  
37 MERS coronavirus in dromedary camels, United Arab Emirates, 2003 and 2013. *Emerg Infect Dis*.  
38 2014;20(4):552-9.  
39
- 40 78. Wu A, Peng Y, Huang B, Ding X, Wang X, Niu P, et al. Genome composition and divergence of  
41 the novel coronavirus (2019-nCoV) originating in China. *Cell host & microbe*. 2020;27(3):325-8.  
42
- 43 79. Wu F, Zhao S, Yu B, Chen Y-M, Wang W, Hu Y, et al. Complete genome characterisation of a  
44 novel coronavirus associated with severe human respiratory disease in Wuhan, China. *BioRxiv*  
45 [preprint]. 2020.  
46
- 47 80. Wrapp D, Wang N, Corbett KS, Goldsmith JA, Hsieh C-L, Abiona O, et al. Cryo-EM structure of  
48 the 2019-nCoV spike in the prefusion conformation. *Science*. 2020;367(6483):1260-3.  
49
- 50 81. Chan JF-W, Kok K-H, Zhu Z, Chu H, To KK-W, Yuan S, et al. Genomic characterization of the  
51 2019 novel human-pathogenic coronavirus isolated from a patient with atypical pneumonia after  
52 visiting Wuhan. *Emerging microbes & infections*. 2020;9(1):221-36.  
53  
54  
55  
56  
57  
58  
59  
60

- 1  
2  
3 82. Chen B, Tian EK, He B, Tian L, Han R, Wang S, et al. Overview of lethal human coronaviruses. *Signal Transduct Target Ther*. 2020;5(1):89.  
4  
5  
6 83. Lauring AS, Hodcroft EB. Genetic Variants of SARS-CoV-2-What Do They Mean? *JAMA*.  
7 2021;325(6):529-31.  
8  
9 84. Duchene S, Featherstone L, Haritopoulou-Sinanidou M, Rambaut A, Lemey P, Baele G.  
10 Temporal signal and the phylodynamic threshold of SARS-CoV-2. *Virus Evol*. 2020;6(2):veaa061.  
11  
12 85. World Health Organisation. Weekly epidemiological update on COVID-19 - 19 October 2021.  
13 Available from: [https://www.who.int/publications/m/item/weekly-epidemiological-update-on-covid-](https://www.who.int/publications/m/item/weekly-epidemiological-update-on-covid-19---19-october-2021)  
14 [19---19-october-2021](https://www.who.int/publications/m/item/weekly-epidemiological-update-on-covid-19---19-october-2021) [Accessed 21 October 2021].  
15  
16 86. gov.uk. Investigation of novel SARS-CoV-2 variant - Variant of Concern 202012/01 - Technical  
17 briefing 5. Available from:  
18 [https://assets.publishing.service.gov.uk/government/uploads/system/uploads/attachment\\_data/file/](https://assets.publishing.service.gov.uk/government/uploads/system/uploads/attachment_data/file/959426/Variant_of_Concern_VOC_202012_01_Technical_Briefing_5.pdf)  
19 [959426/Variant\\_of\\_Concern\\_VOC\\_202012\\_01\\_Technical\\_Briefing\\_5.pdf](https://assets.publishing.service.gov.uk/government/uploads/system/uploads/attachment_data/file/959426/Variant_of_Concern_VOC_202012_01_Technical_Briefing_5.pdf) [Accessed 06 Oct 2021].  
20  
21 87. Lan J, Ge J, Yu J, Shan S, Zhou H, Fan S, et al. Structure of the SARS-CoV-2 spike receptor-  
22 binding domain bound to the ACE2 receptor. *Nature*. 2020;581(7807):215-20.  
23  
24 88. Wang Y, Liu M, Gao J. Enhanced receptor binding of SARS-CoV-2 through networks of  
25 hydrogen-bonding and hydrophobic interactions. *Proc Natl Acad Sci U S A*. 2020;117(25):13967-74.  
26  
27 89. Yi C, Sun X, Ye J, Ding L, Liu M, Yang Z, et al. Key residues of the receptor binding motif in the  
28 spike protein of SARS-CoV-2 that interact with ACE2 and neutralizing antibodies. *Cell Mol Immunol*.  
29 2020;17(6):621-30.  
30  
31 90. Starr TN, Greaney AJ, Hilton SK, Ellis D, Crawford KHD, Dingens AS, et al. Deep Mutational  
32 Scanning of SARS-CoV-2 Receptor Binding Domain Reveals Constraints on Folding and ACE2 Binding.  
33 *Cell*. 2020;182(5):1295-310 e20.  
34  
35 91. Gu H, Chen Q, Yang G, He L, Fan H, Deng YQ, et al. Adaptation of SARS-CoV-2 in BALB/c mice  
36 for testing vaccine efficacy. *Science*. 2020;369(6511):1603-7.  
37  
38 92. Huang Y, Yang C, Xu XF, Xu W, Liu SW. Structural and functional properties of SARS-CoV-2 spike  
39 protein: potential antiviral drug development for COVID-19. *Acta Pharmacol Sin*. 2020;41(9):1141-9.  
40  
41 93. Hoffmann M, Kleine-Weber H, Pohlmann S. A Multibasic Cleavage Site in the Spike Protein of  
42 SARS-CoV-2 Is Essential for Infection of Human Lung Cells. *Mol Cell*. 2020;78(4):779-84 e5.  
43  
44 94. Peacock TP, Goldhill DH, Zhou J, Baillon L, Frise R, Swann OC, et al. The furin cleavage site of  
45 SARS-CoV-2 spike protein is a key determinant for transmission due to enhanced replication in airway  
46 cells. *BioRxiv* [preprint]. 2020.  
47  
48 95. Zhu Y, Feng F, Hu G, Wang Y, Yu Y, Zhu Y, et al. The S1/S2 boundary of SARS-CoV-2 spike protein  
49 modulates cell entry pathways and transmission. *BioRxiv* [preprint]. 2020.  
50  
51 96. Scudellari M. How the coronavirus infects cells - and why Delta is so dangerous. *Nature*.  
52 2021;595(7869):640-4.  
53  
54  
55  
56  
57  
58  
59  
60

- 1  
2  
3 97. Wang Q, Qiu Y, Li JY, Zhou ZJ, Liao CH, Ge XY. A Unique Protease Cleavage Site Predicted in the  
4 Spike Protein of the Novel Pneumonia Coronavirus (2019-nCoV) Potentially Related to Viral  
5 Transmissibility. *Virol Sin.* 2020;35(3):337-9.  
6  
7  
8 98. Yurkovetskiy L, Wang X, Pascal KE, Tomkins-Tinch C, Nyalile TP, Wang Y, et al. Structural and  
9 Functional Analysis of the D614G SARS-CoV-2 Spike Protein Variant. *Cell.* 2020;183(3):739-51 e8.  
10  
11 99. McCarthy KR, Rennick LJ, Nambulli S, Robinson-McCarthy LR, Bain WG, Haidar G, et al. Natural  
12 deletions in the SARS-CoV-2 spike glycoprotein drive antibody escape. *BioRxiv [preprint].* 2021.  
13  
14 100. Kemp SA, Collier DA, Datir R, Ferreira I, Gayed S, Jahun A, et al. Neutralising antibodies in Spike  
15 mediated SARS-CoV-2 adaptation. *MedRxiv [preprint].* 2020.  
16  
17 101. Gamage AM, Tan KS, Chan WOY, Liu J, Tan CW, Ong YK, et al. Infection of human Nasal  
18 Epithelial Cells with SARS-CoV-2 and a 382-nt deletion isolate lacking ORF8 reveals similar viral kinetics  
19 and host transcriptional profiles. *PLoS Pathog.* 2020;16(12):e1009130.  
20  
21 102. Collier DA, De Marco A, Ferreira I, Meng B, Datir RP, Walls AC, et al. Sensitivity of SARS-CoV-2  
22 B.1.1.7 to mRNA vaccine-elicited antibodies. *Nature.* 2021;593(7857):136-41.  
23  
24 103. gov.uk. Variants: distribution of case data, 15 October 2021. Available from:  
25 [https://www.gov.uk/government/publications/covid-19-variants-genomically-confirmed-case-](https://www.gov.uk/government/publications/covid-19-variants-genomically-confirmed-case-numbers/variants-distribution-of-case-data-15-october-2021)  
26 [numbers/variants-distribution-of-case-data-15-october-2021](https://www.gov.uk/government/publications/covid-19-variants-genomically-confirmed-case-numbers/variants-distribution-of-case-data-15-october-2021) [Accessed 23 October 2021].  
27  
28  
29 104. Martínez-García L, Espinel MA, Abreu M, González-Alba JM, Gijón D, McGee A, et al.  
30 Emergence and Spread of B. 1.1. 7 Lineage in Primary Care and Clinical Impact in the Morbi-Mortality  
31 among Hospitalized Patients in Madrid, Spain. *Microorganisms.* 2021;9(7):1517.  
32  
33 105. Vassallo M, Manni S, Klotz C, Fabre R, Pini P, Blanchouin E, et al. Patients Admitted for Variant  
34 Alpha COVID-19 Have Poorer Outcomes than Those Infected with the Old Strain. *J Clin Med.*  
35 2021;10(16).  
36  
37 106. McAlister FA, Nabipoor M, Chu A, Lee DS, Saxinger L, Bakal JA. Lessons from the COVID-19  
38 third wave in Canada: the impact of variants of concern and shifting demographics. . *MedRxiv*  
39 *[preprint].* 2021.  
40  
41 107. Davies NG, Abbott S, Barnard RC, Jarvis CI, Kucharski AJ, Munday JD, et al. Estimated  
42 transmissibility and impact of SARS-CoV-2 lineage B.1.1.7 in England. *Science.* 2021;372(6538).  
43  
44 108. Leung K, Shum MH, Leung GM, Lam TT, Wu JT. Early transmissibility assessment of the N501Y  
45 mutant strains of SARS-CoV-2 in the United Kingdom, October to November 2020. *Euro Surveill.*  
46 2021;26(1).  
47  
48 109. Zhao S, Lou J, Cao L, Zheng H, Chong MKC, Chen Z, et al. Quantifying the transmission  
49 advantage associated with N501Y substitution of SARS-CoV-2 in the UK: an early data-driven analysis.  
50 *J Travel Med.* 2021;28(2).  
51  
52 110. gov.uk. NERVTAG paper on COVID-19 variant of concern B.1.1.7. NERVTAG - COVID-19 Public  
53 statements. Available from:  
54 [https://assets.publishing.service.gov.uk/government/uploads/system/uploads/attachment\\_data/file](https://assets.publishing.service.gov.uk/government/uploads/system/uploads/attachment_data/file/961037/NERVTAG_note_on_B.1.1.7_severity_for_SAGE_77__1_.pdf)  
55 [/961037/NERVTAG\\_note\\_on\\_B.1.1.7\\_severity\\_for\\_SAGE\\_77\\_\\_1\\_.pdf](https://assets.publishing.service.gov.uk/government/uploads/system/uploads/attachment_data/file/961037/NERVTAG_note_on_B.1.1.7_severity_for_SAGE_77__1_.pdf) [Accessed 07 Oct 2021].  
56  
57  
58  
59  
60

- 1  
2  
3 111. Challen R, Brooks-Pollock E, Read JM, Dyson L, Tsaneva-Atanasova K, Danon L. Risk of mortality  
4 in patients infected with SARS-CoV-2 variant of concern 202012/1: matched cohort study. *BMJ*.  
5 2021;372:n579.  
6  
7  
8 112. Paredes MI, Lunn SM, Famulare M, Frisbie LA, Painter I, Burstein R, et al. Associations between  
9 SARS-CoV-2 variants and risk of COVID-19 hospitalization among confirmed cases in Washington State:  
10 a retrospective cohort study. *MedRxiv [preprint]*. 2021.  
11  
12 113. Wang P, Nair MS, Liu L, Iketani S, Luo Y, Guo Y, et al. Antibody Resistance of SARS-CoV-2  
13 Variants B.1.351 and B.1.1.7. *BioRxiv [preprint]*. 2021:2021.01.25.428137.  
14  
15 114. Wu K, Werner AP, Moliva JI, Koch M, Choi A, Stewart-Jones GBE, et al. mRNA-1273 vaccine  
16 induces neutralizing antibodies against spike mutants from global SARS-CoV-2 variants. *BioRxiv*  
17 [preprint]. 2021.  
18  
19 115. Gallais F, Gantner P, Bruel T, Velay A, Planas D, Wendling M-J, et al. Anti-SARS-CoV-2  
20 Antibodies Persist for up to 13 Months and Reduce Risk of Reinfection. *MedRxiv [preprint]*. 2021.  
21  
22 116. European Centre for Disease Prevention and Control. SARS-CoV-2 variants of concern as of 7  
23 October 2021. Available from: <https://www.ecdc.europa.eu/en/covid-19/variants-concern> [Accessed  
24 8 Oct 2021].  
25  
26 117. Korber B, Fischer WM, Gnanakaran S, Yoon H, Theiler J, Abfalterer W, et al. Tracking Changes  
27 in SARS-CoV-2 Spike: Evidence that D614G Increases Infectivity of the COVID-19 Virus. *Cell*.  
28 2020;182(4):812-27 e19.  
29  
30 118. Volz E, Hill V, McCrone JT, Price A, Jorgensen D, O'Toole A, et al. Evaluating the Effects of SARS-  
31 CoV-2 Spike Mutation D614G on Transmissibility and Pathogenicity. *Cell*. 2021;184(1):64-75 e11.  
32  
33 119. Plante JA, Liu Y, Liu J, Xia H, Johnson BA, Lokugamage KG, et al. Spike mutation D614G alters  
34 SARS-CoV-2 fitness. *Nature*. 2021;592(7852):116-21.  
35  
36 120. Pearson CA, Russell TW, Davies NG, Kucharski AJ, group CC-w, Edmunds WJ, et al. Estimates  
37 of severity and transmissibility of novel South Africa SARS-CoV-2 variant 501Y.V2. Centre for  
38 Mathematical Modelling of Infectious Diseases. 2021;Pre-print.  
39  
40 121. Wibmer CK, Ayres F, Hermanus T, Madzivhandila M, Kgagudi P, Oosthuysen B, et al. SARS-CoV-  
41 2 501Y.V2 escapes neutralization by South African COVID-19 donor plasma. *Nat Med*. 2021;27(4):622-  
42 5.  
43  
44 122. Sinha S, Tam B, Wang SM. Altered interaction between RBD and ACE2 receptor contributes  
45 towards the increased transmissibility of SARS CoV-2 delta, kappa, beta, and gamma strains with RBD  
46 double mutations. *BioRxiv [preprint]*. 2021.  
47  
48 123. Campbell F, Archer B, Laurenson-Schafer H, Jinnai Y, Konings F, Batra N, et al. Increased  
49 transmissibility and global spread of SARS-CoV-2 variants of concern as at June 2021. *Euro Surveill*.  
50 2021;26(24).  
51  
52 124. European Centre for Disease Prevention and Control. SARS-CoV-2 increased circulation of  
53 variants of concern and vaccine rollout in the EU/EEA,14th update. Available from:  
54  
55  
56  
57  
58  
59  
60

1  
2  
3 [https://www.ecdc.europa.eu/sites/default/files/documents/RRA-covid-19-14th-update-15-feb-](https://www.ecdc.europa.eu/sites/default/files/documents/RRA-covid-19-14th-update-15-feb-2021.pdf)  
4 [2021.pdf](https://www.ecdc.europa.eu/sites/default/files/documents/RRA-covid-19-14th-update-15-feb-2021.pdf) [Accessed 8 October 2021].  
5

6 125. Khan A, Zia T, Suleman M, Khan T, Ali SS, Abbasi AA, et al. Higher infectivity of the SARS-CoV-  
7 2 new variants is associated with K417N/T, E484K, and N501Y mutants: An insight from structural data.  
8 *J Cell Physiol.* 2021;236(10):7045-57.  
9

10 126. Baum A, Fulton BO, Wloga E, Copin R, Pascal KE, Russo V, et al. Antibody cocktail to SARS-CoV-  
11 2 spike protein prevents rapid mutational escape seen with individual antibodies. *Science.*  
12 2020;369(6506):1014-8.  
13  
14

15 127. Curran J, Dol J, Boulos L, Somerville M, McCulloch H, MacDonald M, et al. Transmission  
16 characteristics of SARS-CoV-2 variants of concern. *MedRxiv [preprint].* 2021.  
17

18 128. Faria NR, Mellan TA, Whittaker C, Claro IM, Candido DDS, Mishra S, et al. Genomics and  
19 epidemiology of the P.1 SARS-CoV-2 lineage in Manaus, Brazil. *Science.* 2021;372(6544):815-21.  
20

21 129. Freitas ARR, Beckedorff OA, Cavalcanti LPG, Siqueira AM, Castro DB, Costa CFD, et al. The  
22 emergence of novel SARS-CoV-2 variant P.1 in Amazonas (Brazil) was temporally associated with a  
23 change in the age and sex profile of COVID-19 mortality: A population based ecological study. *Lancet*  
24 *Reg Health Am.* 2021;1:100021.  
25  
26

27 130. Funk T, Pharris A, Spiteri G, Bundle N, Melidou A, Carr M, et al. Characteristics of SARS-CoV-2  
28 variants of concern B.1.1.7, B.1.351 or P.1: data from seven EU/EEA countries, weeks 38/2020 to  
29 10/2021. *Euro Surveill.* 2021;26(16).  
30  
31

32 131. Sabino EC, Buss LF, Carvalho MPS, Prete CA, Jr., Crispim MAE, Fraiji NA, et al. Resurgence of  
33 COVID-19 in Manaus, Brazil, despite high seroprevalence. *Lancet.* 2021;397(10273):452-5.  
34

35 132. Dejnirattisai W, Zhou D, Supasa P, Liu C, Mentzer AJ, Ginn HM, et al. Antibody evasion by the  
36 P.1 strain of SARS-CoV-2. *Cell.* 2021;184(11):2939-54 e9.  
37

38 133. Augusto G, Mohsen MO, Zinkhan S, Liu X, Vogel M, Bachmann MF. In vitro data suggest that  
39 Indian delta variant B.1.617 of SARS-CoV-2 escapes neutralization by both receptor affinity and  
40 immune evasion. *Allergy.* 2021.  
41  
42

43 134. Tchesnokova V, Kulakesara H, Larson L, Bowers V, Rechkina E, Kisiela D, et al. Acquisition of  
44 the L452R mutation in the ACE2-binding interface of Spike protein triggers recent massive expansion  
45 of SARS-Cov-2 variants. *BioRxiv [preprint].* 2021.  
46

47 135. Li Q, Wu J, Nie J, Zhang L, Hao H, Liu S, et al. The Impact of Mutations in SARS-CoV-2 Spike on  
48 Viral Infectivity and Antigenicity. *Cell.* 2020;182(5):1284-94 e9.  
49

50 136. Kumar V, Singh J, Hasnain SE, Sundar D. Possible Link between Higher Transmissibility of Alpha,  
51 Kappa and Delta Variants of SARS-CoV-2 and Increased Structural Stability of Its Spike Protein and  
52 hACE2 Affinity. *Int J Mol Sci.* 2021;22(17).  
53  
54

55 137. Di Giacomo S, Mercatelli D, Rakhimov A, Giorgi FM. Preliminary report on severe acute  
56 respiratory syndrome coronavirus 2 (SARS-CoV-2) Spike mutation T478K. *J Med Virol.*  
57 2021;93(9):5638-43.  
58  
59  
60

- 1  
2  
3 138. Torjesen I. Covid-19: Delta variant is now UK's most dominant strain and spreading through  
4 schools. *BMJ*. 2021;373:n1445.  
5  
6 139. Centers for Disease Prevention and Control. COVID data tracker. Available from:  
7 <https://covid.cdc.gov/covid-data-tracker/#variant-proportions> [Accessed 11 October 2021].  
8  
9 140. World Health Organisation. SARS-CoV-2 Delta variant now dominant in much of European  
10 region; efforts must be reinforced to prevent transmission, warns WHO Regional Office for Europe  
11 and ECDC. Available from: [https://www.euro.who.int/en/media-centre/sections/press-](https://www.euro.who.int/en/media-centre/sections/press-releases/2021/sars-cov-2-delta-variant-now-dominant-in-much-of-european-region-efforts-must-be-reinforced-to-prevent-transmission,-warns-who-regional-office-for-europe-and-ecdc)  
12 [releases/2021/sars-cov-2-delta-variant-now-dominant-in-much-of-european-region-efforts-must-](https://www.euro.who.int/en/media-centre/sections/press-releases/2021/sars-cov-2-delta-variant-now-dominant-in-much-of-european-region-efforts-must-be-reinforced-to-prevent-transmission,-warns-who-regional-office-for-europe-and-ecdc)  
13 [be-reinforced-to-prevent-transmission,-warns-who-regional-office-for-europe-and-ecdc](https://www.euro.who.int/en/media-centre/sections/press-releases/2021/sars-cov-2-delta-variant-now-dominant-in-much-of-european-region-efforts-must-be-reinforced-to-prevent-transmission,-warns-who-regional-office-for-europe-and-ecdc) [Accessed  
14 11 October 2021].  
15  
16 141. Li B, Deng A, Li K, Hu Y, Li Z, Xiong Q, et al. Viral infection and transmission in a large, well-  
17 traced outbreak caused by the SARS-CoV-2 Delta variant *MedRxiv* [preprint]. 2021.  
18  
19 142. Teyssou E, Delagreverie H, Visseaux B, Lambert-Niclot S, Brichler S, Ferre V, et al. The Delta  
20 SARS-CoV-2 variant has a higher viral load than the Beta and the historical variants in nasopharyngeal  
21 samples from newly diagnosed COVID-19 patients. *J Infect*. 2021;83(4):e1-e3.  
22  
23 143. Kumar A, Asghar A, Raza K, Narayan RK, Jha RK, Satyam A, et al. Demographic characteristics  
24 of SARS-CoV-2 B.1.617.2 (Delta) variant infections in Indian population. *MedRxiv* [preprint]. 2021.  
25  
26 144. Planas D, Veyer D, Baidaliuk A, Staropoli I, Guivel-Benhassine F, Rajah MM, et al. Reduced  
27 sensitivity of SARS-CoV-2 variant Delta to antibody neutralization. *Nature*. 2021;596(7871):276-80.  
28  
29 145. Sheikh A, McMenamin J, Taylor B, Robertson C, Public Health S, the EIIC. SARS-CoV-2 Delta  
30 VOC in Scotland: demographics, risk of hospital admission, and vaccine effectiveness. *Lancet*.  
31 2021;397(10293):2461-2.  
32  
33 146. Fisman DN, Tuite AR. Progressive Increase in Virulence of Novel SARS-CoV-2 Variants in  
34 Ontario, Canada. *MedRxiv* [preprint]. 2021.  
35  
36 147. Tada T, Zhou H, Dcosta BM, Samanovic MI, Mulligan MJ, Landau NR. SARS-CoV-2 Lambda  
37 Variant Remains Susceptible to Neutralization by mRNA Vaccine-elicited Antibodies and Convalescent  
38 Serum. *BioRxiv* [preprint]. 2021.  
39  
40 148. Acevedo ML, Alonso-Palomares L, Bustamante A, Gaggero A, Paredes F, Cortés CP, et al.  
41 Infectivity and immune escape of the new SARS-CoV-2 variant of interest Lambda. *MedRxiv* [preprint].  
42 2021.  
43  
44 149. Laiton-Donato K, Franco-Munoz C, Alvarez-Diaz DA, Ruiz-Moreno HA, Usme-Ciro JA, Prada DA,  
45 et al. Characterization of the emerging B.1.621 variant of interest of SARS-CoV-2. *Infect Genet Evol*.  
46 2021;95:105038.  
47  
48 150. Chen J, Gao K, Wang R, Wei GW. Revealing the Threat of Emerging SARS-CoV-2 Mutations to  
49 Antibody Therapies. *J Mol Biol*. 2021;433(18):167155.  
50  
51 151. Padron-Regalado E. Vaccines for SARS-CoV-2: lessons from other coronavirus strains.  
52 *Infectious diseases and therapy*. 2020;9(2):255-74.  
53  
54 152. Amanat F, Krammer F. SARS-CoV-2 vaccines: status report. *Immunity*. 2020;52(4):583-9.  
55  
56  
57  
58  
59  
60

- 1  
2  
3 153. World Health Organisation. Coronavirus disease (COVID-19): Vaccines. Available from:  
4 <https://www.who.int/emergencies/diseases/novel-coronavirus-2019/covid-19-vaccines> [Accessed 11  
5 October 2021].  
6  
7  
8 154. World Health Organisation. COVID-19 vaccine tracker and landscape. Available from:  
9 <https://www.who.int/publications/m/item/draft-landscape-of-covid-19-candidate-vaccines>  
10 [Accessed 20 October 2021].  
11  
12 155. COVID-19 Vaccine tracker. COVID-19 Vaccine Tracker - 7 Vaccines Approved for Use by WHO.  
13 Available from: <https://covid19.trackvaccines.org/agency/who/> [Accessed 21 October 2021].  
14  
15 156. Polack FP, Thomas SJ, Kitchin N, Absalon J, Gurtman A, Lockhart S, et al. Safety and Efficacy of  
16 the BNT162b2 mRNA Covid-19 Vaccine. *N Engl J Med.* 2020;383(27):2603-15.  
17  
18 157. Sahin U, Muik A, Vogler I, Derhovanessian E, Kranz LM, Vormehr M, et al. BNT162b2 vaccine  
19 induces neutralizing antibodies and poly-specific T cells in humans. *Nature.* 2021;595(7868):572-7.  
20  
21 158. Walsh EE, Frenck RW, Jr., Falsey AR, Kitchin N, Absalon J, Gurtman A, et al. Safety and  
22 Immunogenicity of Two RNA-Based Covid-19 Vaccine Candidates. *N Engl J Med.* 2020;383(25):2439-  
23 50.  
24  
25 159. Mukhopadhyay L, Yadav PD, Gupta N, Mohandas S, Patil DY, Shete-Aich A, et al. Comparison  
26 of the immunogenicity & protective efficacy of various SARS-CoV-2 vaccine candidates in non-human  
27 primates. *Indian J Med Res.* 2021;153(1 & 2):93-114.  
28  
29 160. Sharma O, Sultan AA, Ding H, Triggler CR. A Review of the Progress and Challenges of  
30 Developing a Vaccine for COVID-19. *Front Immunol.* 2020;11:585354.  
31  
32 161. Ewer KJ, Barrett JR, Belij-Rammerstorfer S, Sharpe H, Makinson R, Morter R, et al. T cell and  
33 antibody responses induced by a single dose of ChAdOx1 nCoV-19 (AZD1222) vaccine in a phase 1/2  
34 clinical trial. *Nat Med.* 2021;27(2):270-8.  
35  
36 162. Folegatti PM, Ewer KJ, Aley PK, Angus B, Becker S, Belij-Rammerstorfer S, et al. Safety and  
37 immunogenicity of the ChAdOx1 nCoV-19 vaccine against SARS-CoV-2: a preliminary report of a phase  
38 1/2, single-blind, randomised controlled trial. *Lancet.* 2020;396(10249):467-78.  
39  
40 163. World Health Organisation. WHO lists two additional COVID-19 vaccines for emergency use  
41 and COVAX roll-out. Available from: [https://www.who.int/news/item/15-02-2021-who-lists-two-](https://www.who.int/news/item/15-02-2021-who-lists-two-additional-covid-19-vaccines-for-emergency-use-and-covax-roll-out)  
42 [additional-covid-19-vaccines-for-emergency-use-and-covax-roll-out](https://www.who.int/news/item/15-02-2021-who-lists-two-additional-covid-19-vaccines-for-emergency-use-and-covax-roll-out) [Accessed 13 October 2021].  
43  
44 164. Sadoff J, Gray G, Vandebosch A, Cardenas V, Shukarev G, Grinsztejn B, et al. Safety and Efficacy  
45 of Single-Dose Ad26.COV2.S Vaccine against Covid-19. *N Engl J Med.* 2021;384(23):2187-201.  
46  
47 165. Alter G, Yu J, Liu J, Chandrashekar A, Borducchi EN, Tostanoski LH, et al. Immunogenicity of  
48 Ad26.COV2.S vaccine against SARS-CoV-2 variants in humans. *Nature.* 2021;596(7871):268-72.  
49  
50 166. Baden LR, El Sahly HM, Essink B, Kotloff K, Frey S, Novak R, et al. Efficacy and Safety of the  
51 mRNA-1273 SARS-CoV-2 Vaccine. *N Engl J Med.* 2021;384(5):403-16.  
52  
53 167. Jackson LA, Anderson EJ, Rouphael NG, Roberts PC, Makhene M, Coler RN, et al. An mRNA  
54 Vaccine against SARS-CoV-2 - Preliminary Report. *N Engl J Med.* 2020;383(20):1920-31.  
55  
56  
57  
58  
59  
60



- 1  
2  
3 168. Corbett KS, Flynn B, Foulds KE, Francica JR, Boyoglu-Barnum S, Werner AP, et al. Evaluation of  
4 the mRNA-1273 Vaccine against SARS-CoV-2 in Nonhuman Primates. *N Engl J Med.*  
5 2020;383(16):1544-55.  
6  
7 169. Chu L, McPhee R, Huang W, Bennett H, Pajon R, Nestorova B, et al. A preliminary report of a  
8 randomized controlled phase 2 trial of the safety and immunogenicity of mRNA-1273 SARS-CoV-2  
9 vaccine. *Vaccine.* 2021;39(20):2791-9.  
10  
11 170. World Health Organisation. Recommendation for an emergency use listing of COVID-19  
12 vaccine BIBP submitted by Beijing Institute of Biological Products Co., Ltd. 4 June 2021. Available from:  
13 who.int [Accessed 13 October 2021].  
14  
15 171. Xia S, Zhang Y, Wang Y, Wang H, Yang Y, Gao GF, et al. Safety and immunogenicity of an  
16 inactivated SARS-CoV-2 vaccine, BBIBP-CorV: a randomised, double-blind, placebo-controlled, phase  
17 1/2 trial. *Lancet Infect Dis.* 2021;21(1):39-51.  
18  
19 172. Valyi-Nagy I, Matula Z, Gonczi M, Tasnady S, Beko G, Reti M, et al. Comparison of antibody  
20 and T cell responses elicited by BBIBP-CorV (Sinopharm) and BNT162b2 (Pfizer-BioNTech) vaccines  
21 against SARS-CoV-2 in healthy adult humans. *Geroscience.* 2021.  
22  
23 173. World Health Organisation. Background document on the inactivated vaccine Sinovac-  
24 CoronaVac against COVID-19. Available from: [https://www.who.int/publications/i/item/WHO-2019-](https://www.who.int/publications/i/item/WHO-2019-nCoV-vaccines-SAGE_recommendation-Sinovac-CoronaVac-background-2021.1)  
25 [nCoV-vaccines-SAGE\\_recommendation-Sinovac-CoronaVac-background-2021.1](https://www.who.int/publications/i/item/WHO-2019-nCoV-vaccines-SAGE_recommendation-Sinovac-CoronaVac-background-2021.1) [Accessed 13  
26 October 2021].  
27  
28 174. Zhang Y, Zeng G, Pan H, Li C, Hu Y, Chu K, et al. Safety, tolerability, and immunogenicity of an  
29 inactivated SARS-CoV-2 vaccine in healthy adults aged 18-59 years: a randomised, double-blind,  
30 placebo-controlled, phase 1/2 clinical trial. *Lancet Infect Dis.* 2021;21(2):181-92.  
31  
32 175. Vacharathit V, Aiewsakun P, Manopwisedjaroen S, Srisaowakarn C, Laopanupong T, Ludowyke  
33 N, et al. CoronaVac induces lower neutralising activity against variants of concern than natural  
34 infection. *Lancet Infect Dis.* 2021;21(10):1352-4.  
35  
36 176. Shrotri M, Navaratnam AMD, Nguyen V, Byrne T, Geismar C, Fragaszy E, et al. Spike-antibody  
37 waning after second dose of BNT162b2 or ChAdOx1. *Lancet.* 2021;398(10298):385-7.  
38  
39 177. L'Huillier AG, Meyer B, Andrey DO, Arm-Vernez I, Baggio S, Didierlaurent A, et al. Antibody  
40 persistence in the first 6 months following SARS-CoV-2 infection among hospital workers: a  
41 prospective longitudinal study. *Clin Microbiol Infect.* 2021.  
42  
43 178. Post N, Eddy D, Huntley C, van Schalkwyk MCI, Shrotri M, Leeman D, et al. Antibody response  
44 to SARS-CoV-2 infection in humans: A systematic review. *PLoS One.* 2020;15(12):e0244126.  
45  
46 179. Chemaitelly H, Tang P, Hasan MR, AlMukdad S, Yassine HM, Benslimane FM, et al. Waning of  
47 BNT162b2 Vaccine Protection against SARS-CoV-2 Infection in Qatar. *N Engl J Med.* 2021.  
48  
49 180. Mizrahi B, Lotan R, Kalkstein N, Peretz A, Perez G, Ben-Tov A, et al. Correlation of SARS-CoV-2  
50 Breakthrough Infections to Time-from-vaccine; Preliminary Study. *MedRxiv [preprint].* 2021.  
51  
52 181. Thomas SJ, Moreira ED, Kitchin N, Absalon J, Gurtman A, Lockhart S, et al. Six Month Safety  
53 and Efficacy of the BNT162b2 mRNA COVID-19 Vaccine. *MedRxiv [preprint].* 2021.  
54  
55  
56  
57  
58  
59  
60

- 1  
2  
3 182. Tre-Hardy M, Cupaiolo R, Wilmet A, Antoine-Moussiaux T, Della Vecchia A, Horeanga A, et al. Six-month interim analysis of ongoing immunogenicity surveillance of the mRNA-1273 vaccine in healthcare workers: A third dose is expected. *J Infect*. 2021.
- 4  
5  
6  
7  
8 183. Bar-On YM, Goldberg Y, Mandel M, Bodenheimer O, Freedman L, Kalkstein N, et al. Protection of BNT162b2 Vaccine Booster against Covid-19 in Israel. *N Engl J Med*. 2021;385(15):1393-400.
- 9  
10  
11 184. Pan H, Wu Q, Zeng G, Yang J, Jiang D, Deng X, et al. Immunogenicity and safety of a third dose, and immune persistence of CoronaVac vaccine in healthy adults aged 18-59 years: interim results from a double-blind, randomized, placebo-controlled phase 2 clinical trial *MedRxiv* [preprint]. 2021.
- 12  
13  
14  
15 185. Choi A, Koch M, Wu K, Chu L, Ma L, Hill A, et al. Safety and immunogenicity of SARS-CoV-2 variant mRNA vaccine boosters in healthy adults: an interim analysis. *Nat Med*. 2021.
- 16  
17  
18 186. Flaxman A, Marchevsky N, Jenkin D, Aboagye J, Aley PK, Angus BJ, et al. Tolerability and immunogenicity after a late second dose or a third dose of ChAdOx1 nCoV-19 (AZD1222). *Preprints with the Lancet* [Preprint]. 28 Jun 2021.
- 19  
20  
21  
22 187. Iketani S, Liu L, Nair MS, Mohri H, Wang M, Huang Y, et al. A third COVID-19 vaccine shot markedly boosts neutralizing antibody potency and breadth *MedRxiv* [preprint]. 2021.
- 23  
24  
25  
26 188. Schmidt T, Klemis V, Schub D, Mihm J, Hielscher F, Marx S, et al. Immunogenicity and reactogenicity of a heterologous COVID-19 prime-boost vaccination compared with homologous vaccine regimens *MedRxiv* [preprint]. 2021.
- 27  
28  
29  
30 189. Borobia AM, Carcas AJ, Perez-Olmeda M, Castano L, Bertran MJ, Garcia-Perez J, et al. Immunogenicity and reactogenicity of BNT162b2 booster in ChAdOx1-S-primed participants (CombiVacS): a multicentre, open-label, randomised, controlled, phase 2 trial. *Lancet*. 2021;398(10295):121-30.
- 31  
32  
33  
34  
35  
36 190. Centres for Disease Control and Prevention. Pandemic Influenza. Available from: <https://www.cdc.gov/flu/pandemic-resources/1918-pandemic-h1n1.html> [Accessed 21 October 2021].
- 37  
38  
39  
40  
41  
42  
43 191. Peeri NC, Shrestha N, Rahman MS, Zaki R, Tan Z, Bibi S, et al. The SARS, MERS and novel coronavirus (COVID-19) epidemics, the newest and biggest global health threats: what lessons have we learned? *Int J Epidemiol*. 2020;49(3):717-26.
- 44  
45  
46 192. Cohen J, Rodgers YVM. Contributing factors to personal protective equipment shortages during the COVID-19 pandemic. *Prev Med*. 2020;141:106263.
- 47  
48  
49  
50 193. Chadeau-Hyam M, Bodinier B, Elliott J, Whitaker MD, Tzoulaki I, Vermeulen R, et al. Risk factors for positive and negative COVID-19 tests: a cautious and in-depth analysis of UK biobank data. *Int J Epidemiol*. 2020;49(5):1454-67.
- 51  
52  
53 194. Patel JA, Nielsen FBH, Badiani AA, Assi S, Unadkat VA, Patel B, et al. Poverty, inequality and COVID-19: the forgotten vulnerable. *Public Health*. 2020;183:110-1.
- 54  
55  
56  
57  
58  
59 195. Marcus Shephard, Emma Norris, gov.uk Institute for Government. The coronavirus inquiry - The case for an investigation of government actions during the Covid pandemic. <https://www.instituteforgovernment.org.uk/publications/coronavirus-inquiry> [Accessed 21 October 2021].
- 60

- 1  
2  
3 196. Townsend JP, Hassler HB, Wang Z, Miura S, Singh J, Kumar S, et al. The durability of immunity  
4 against reinfection by SARS-CoV-2: a comparative evolutionary study. *Lancet Microbe*. 2021.  
5  
6 197. Dagan N, Barda N, Kepten E, Miron O, Perchik S, Katz MA, et al. BNT162b2 mRNA Covid-19  
7 Vaccine in a Nationwide Mass Vaccination Setting. *N Engl J Med*. 2021;384(15):1412-23.  
8  
9 198. Lopez Bernal J, Andrews N, Gower C, Gallagher E, Simmons R, Thelwall S, et al. Effectiveness  
10 of Covid-19 Vaccines against the B.1.617.2 (Delta) Variant. *N Engl J Med*. 2021;385(7):585-94.  
11  
12 199. Abu-Raddad LJ, Chemaitelly H, Butt AA, National Study Group for C-V. Effectiveness of the  
13 BNT162b2 Covid-19 Vaccine against the B.1.1.7 and B.1.351 Variants. *N Engl J Med*. 2021;385(2):187-  
14 9.  
15  
16 200. Chung H, He S, Nasreen S, Sundaram ME, Buchan SA, Wilson SE, et al. Effectiveness of  
17 BNT162b2 and mRNA-1273 covid-19 vaccines against symptomatic SARS-CoV-2 infection and severe  
18 covid-19 outcomes in Ontario, Canada: test negative design study. *BMJ*. 2021;374:n1943.  
19  
20 201. Nasreen S, Chung H, He S, Brown KA, Gubbay JB, Buchan SA, et al. Effectiveness of mRNA and  
21 ChAdOx1 COVID-19 vaccines against symptomatic SARS CoV-2 infection and severe outcomes with  
22 variants of concern in Ontario. *MedRxiv [preprint]*. 2021.  
23  
24 202. Puranik A, Lenehan PJ, Silvert E, Niesen MJM, Corchado-Garcia J, O'Horo JC, et al. Comparison  
25 of two highly-effective mRNA vaccines for COVID-19 during periods of Alpha and Delta variant  
26 prevalence. *MedRxiv [preprint]*. 2021.  
27  
28 203. Julia Stowe, Nick Andrews, Charlotte Gower, Eileen Gallagher, Lara Utsi, Ruth Simmons, et al.  
29 Effectiveness of COVID-19 vaccines against hospital admission with the Delta (B.1.617.2) variant.  
30 *Public Health England [preprint]*. 2021.  
31  
32 204. Lopez Bernal J, Andrews N, Gower C, Robertson C, Stowe J, Tessier E, et al. Effectiveness of  
33 the Pfizer-BioNTech and Oxford-AstraZeneca vaccines on covid-19 related symptoms, hospital  
34 admissions, and mortality in older adults in England: test negative case-control study. *BMJ*.  
35 2021;373:n1088.  
36  
37 205. Skowronski DM, Setayeshgar S, Zou M, Prystajecy N, Tyson JR, Galanis E, et al. Single-dose  
38 mRNA vaccine effectiveness against SARS-CoV-2, including Alpha and Gamma variants: a test-negative  
39 design in adults 70 years and older in British Columbia, Canada. *Clin Infect Dis*. 2021.  
40  
41 206. Carazo S, Talbot D, Boulianne N, Brisson M, Gilca R, Deceuninck G, et al. Single-dose mRNA  
42 vaccine effectiveness against SARS-CoV-2 in healthcare workers extending 16 weeks post-vaccination:  
43 a test-negative design from Quebec, Canada. *Clin Infect Dis*. 2021.  
44  
45 207. Charmet T, Schaeffer L, Grant R, Galmiche S, Cheny O, Von Platen C, et al. Impact of original,  
46 B.1.1.7, and B.1.351/P.1 SARS-CoV-2 lineages on vaccine effectiveness of two doses of COVID-19  
47 mRNA vaccines: Results from a nationwide case-control study in France. *Lancet Reg Health Eur*.  
48 2021;8:100171.  
49  
50 208. Tang P, Hasan MR, Chemaitelly H, Yassine HM, Benslimane FM, Khatib HAA, et al. BNT162b2  
51 and mRNA-1273 COVID-19 vaccine effectiveness against the Delta (B.1.617.2) variant in Qatar.  
52 *MedRxiv [preprint]*. 2021.  
53  
54  
55  
56  
57  
58  
59  
60

- 1  
2  
3 209. Hall VJ, Foulkes S, Saei A, Andrews N, Oguti B, Charlett A, et al. COVID-19 vaccine coverage in  
4 health-care workers in England and effectiveness of BNT162b2 mRNA vaccine against infection  
5 (SIREN): a prospective, multicentre, cohort study. *Lancet*. 2021;397(10286):1725-35.  
6  
7  
8 210. Haas EJ, Angulo FJ, McLaughlin JM, Anis E, Singer SR, Khan F, et al. Impact and effectiveness  
9 of mRNA BNT162b2 vaccine against SARS-CoV-2 infections and COVID-19 cases, hospitalisations, and  
10 deaths following a nationwide vaccination campaign in Israel: an observational study using national  
11 surveillance data. *Lancet*. 2021;397(10287):1819-29.  
12  
13 211. Nanduri S, Pilishvili T, Derado G, Soe MM, Dollard P, Wu H, et al. Effectiveness of Pfizer-  
14 BioNTech and Moderna Vaccines in Preventing SARS-CoV-2 Infection Among Nursing Home Residents  
15 Before and During Widespread Circulation of the SARS-CoV-2 B.1.617.2 (Delta) Variant - National  
16 Healthcare Safety Network, March 1-August 1, 2021. *MMWR Morb Mortal Wkly Rep*.  
17 2021;70(34):1163-6.  
18  
19 212. Fowlkes A, Gaglani M, Groover K, Thiese MS, Tyner H, Ellingson K, et al. Effectiveness of COVID-  
20 19 Vaccines in Preventing SARS-CoV-2 Infection Among Frontline Workers Before and During B.1.617.2  
21 (Delta) Variant Predominance - Eight U.S. Locations, December 2020-August 2021. *MMWR Morb*  
22 *Mortal Wkly Rep*. 2021;70(34):1167-9.  
23  
24 213. Lefevre B, Tondeur L, Madec Y, Grant R, Lina B, van der Werf S, et al. Beta SARS-CoV-2 variant  
25 and BNT162b2 vaccine effectiveness in long-term care facilities in France. *Lancet Healthy Longev*.  
26 2021.  
27  
28 214. Pouwels KB, Pritchard E, Matthews PC, Stoesser N, Eyre DW, Vihta K-D, et al. Effect of Delta  
29 variant on viral burden and vaccine effectiveness against new SARS-CoV-2 infections in the UK. *Nature*  
30 *Medicine*. 2021.  
31  
32 215. Williams C, Al-Bargash D, Macalintal C, Stuart R, Seth A, Latham J, et al. COVID-19 Outbreak  
33 Associated with a SARS-CoV-2 P.1 Lineage in a Long-Term Care Home after Implementation of a  
34 Vaccination Program - Ontario, April-May 2021. *Clin Infect Dis*. 2021.  
35  
36 216. Emary KRW, Golubchik T, Aley PK, Ariani CV, Angus B, Bibi S, et al. Efficacy of ChAdOx1 nCoV-  
37 19 (AZD1222) vaccine against SARS-CoV-2 variant of concern 202012/01 (B.1.1.7): an exploratory  
38 analysis of a randomised controlled trial. *Lancet*. 2021;397(10282):1351-62.  
39  
40 217. AstraZeneca. AZD1222 US Phase III trial met primary efficacy endpoint in preventing COVID-  
41 19 at interim analysis. Available from: [https://www.astrazeneca.com/media-centre/press-](https://www.astrazeneca.com/media-centre/press-releases/2021/astrazeneca-us-vaccine-trial-met-primary-endpoint.html)  
42 [releases/2021/astrazeneca-us-vaccine-trial-met-primary-endpoint.html](https://www.astrazeneca.com/media-centre/press-releases/2021/astrazeneca-us-vaccine-trial-met-primary-endpoint.html) [Accessed 15 October 2021].  
43  
44 218. Voysey M, Clemens SAC, Madhi SA, Weckx LY, Folegatti PM, Aley PK, et al. Safety and efficacy  
45 of the ChAdOx1 nCoV-19 vaccine (AZD1222) against SARS-CoV-2: an interim analysis of four  
46 randomised controlled trials in Brazil, South Africa, and the UK. *Lancet*. 2021;397(10269):99-111.  
47  
48 219. Madhi SA, Baillie V, Cutland CL, Voysey M, Koen AL, Fairlie L, et al. Efficacy of the ChAdOx1  
49 nCoV-19 Covid-19 Vaccine against the B.1.351 Variant. *N Engl J Med*. 2021;384(20):1885-98.  
50  
51 220. Pramod S, Govindan D, Ramasubramani P, Kar SS, Aggarwal R, Manoharan N, et al.  
52 Effectiveness of Covishield vaccine in preventing Covid-19 – A test-negative case control study.  
53 *MedRxiv [preprint]*. 2021.  
54  
55  
56  
57  
58  
59  
60

- 1  
2  
3 221. Ranzani OT, dos Santos Leite R, Castilho LD, Gonçalves CCM, Resende G, de Melo RL, et al.  
4 Vaccine effectiveness of Ad26.COVS against symptomatic COVID-19 and clinical outcomes in Brazil:  
5 a test-negative study design. MedRxiv [preprint]. 18 October 2021.  
6  
7 222. Corchado-Garcia J, Puyraimond-Zemmour D, Hughes T, Cristea-Platon T, Lenehan P,  
8 Pawlowski C, et al. Real-world effectiveness of Ad26.COVS adenoviral vector vaccine for COVID-19.  
9 MedRxiv [preprint]. 2021.  
10  
11 223. Barlow RS, Jian K, Larson L. Effectiveness of COVID-19 Vaccines Against SARS-CoV-2 Infection  
12 During a Delta Variant Epidemic Surge in Multnomah County, Oregon, July 2021. MedRxiv [preprint].  
13 2021.  
14  
15 224. Polinski JM, Weckstein AR, Batech M, Kabelac C, Kamath T, Harvey R, et al. Effectiveness of  
16 the Single-Dose Ad26.COVS COVID Vaccine. MedRxiv [preprint]. 2021.  
17  
18 225. Li XN, Huang Y, Wang W, Jing QL, Zhang CH, Qin PZ, et al. Effectiveness of inactivated SARS-  
19 CoV-2 vaccines against the Delta variant infection in Guangzhou: a test-negative case-control real-  
20 world study. Emerg Microbes Infect. 2021;10(1):1751-9.  
21  
22 226. Jara A, Undurraga EA, Gonzalez C, Paredes F, Fontecilla T, Jara G, et al. Effectiveness of an  
23 Inactivated SARS-CoV-2 Vaccine in Chile. N Engl J Med. 2021;385(10):875-84.  
24  
25 227. Ranzani OT, Hitchings MDT, Dorion M, D'Agostini TL, de Paula RC, de Paula OFP, et al.  
26 Effectiveness of the CoronaVac vaccine in older adults during a gamma variant associated epidemic of  
27 covid-19 in Brazil: test negative case-control study. BMJ. 2021;374:n2015.  
28  
29  
30  
31  
32  
33  
34  
35  
36  
37  
38  
39  
40  
41  
42  
43  
44  
45  
46  
47  
48  
49  
50  
51  
52  
53  
54  
55  
56  
57  
58  
59  
60

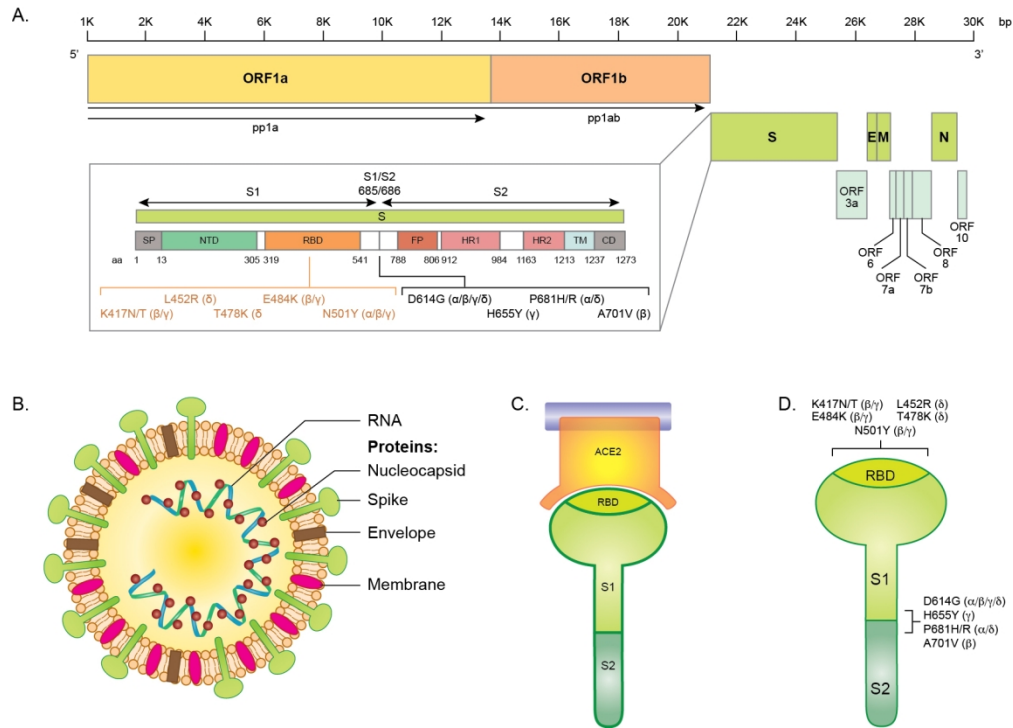

Figure 1: Genome and structure of SARS-CoV-2.

150x109mm (300 x 300 DPI)

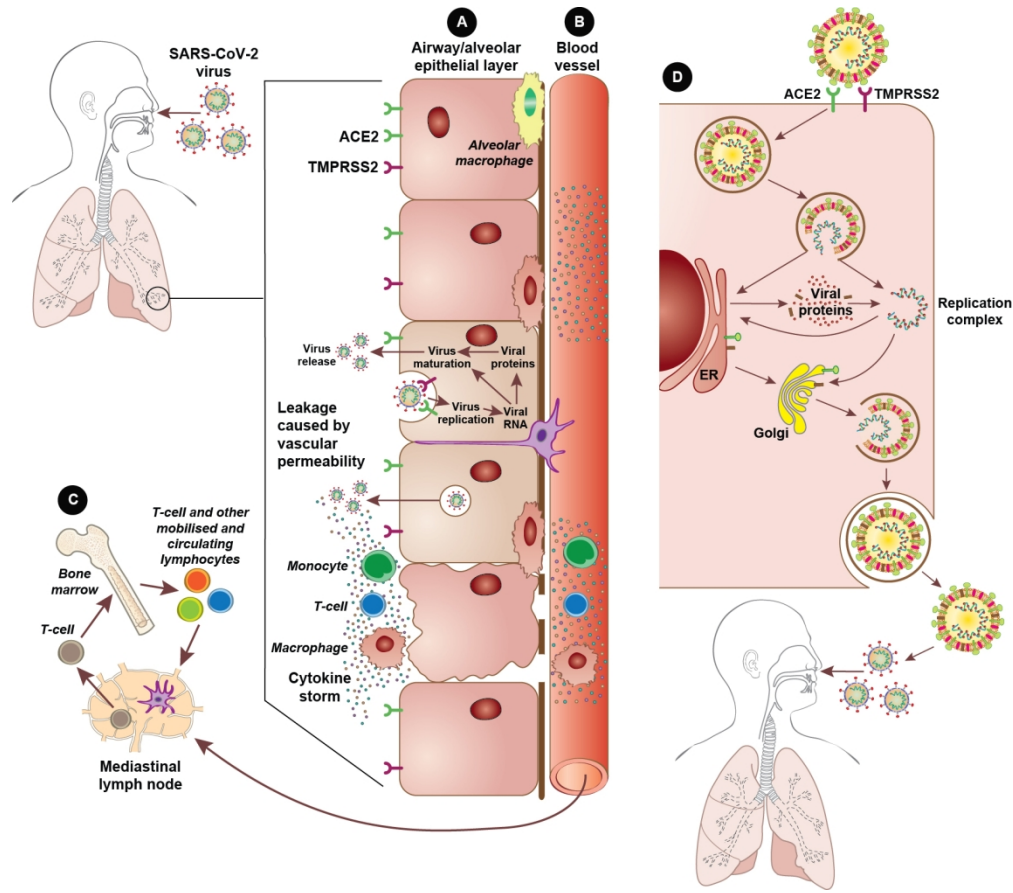

Figure 2: Viral entry and host response.

153x135mm (300 x 300 DPI)

| Variants of concern              |               |                                 |       |       |           |             |                              |
|----------------------------------|---------------|---------------------------------|-------|-------|-----------|-------------|------------------------------|
| WHO nomenclature or designation  | Pango Lineage | S protein mutations of interest |       |       |           |             | First detected samples *     |
| Alpha                            | B.1.1.7       | N501Y                           | D614G | P681H |           |             | UK, Sept 2020                |
| Beta                             | B.1.351       | K417N                           | E484K | N501Y | D614G     | A701V       | South Africa, May 2020       |
| Gamma                            | P.1           | K417T                           | E484K | N501Y | D614G     | H655Y       | Brazil, Nov 2020             |
| Delta                            | B.1.617.2     | L452R                           | T478K | D614G | P681R     |             | India, Oct 2020              |
| Variants of Interest             |               |                                 |       |       |           |             |                              |
| WHO nomenclature or designation  | Pango Lineage | S protein mutations of interest |       |       |           |             | First detected samples *     |
| Lambda                           | C.37          | L452Q                           | F490S | D614G |           |             | Peru, Dec 2020               |
| Mu                               | B.1.621       | R346K                           | E484K | N501Y | D614G     | P681H       | Columbia, Jan 2021           |
| Variants under monitoring        |               |                                 |       |       |           |             |                              |
| Pango Lineage (WHO nomenclature) |               | S protein mutations of interest |       |       |           |             | First detected samples *     |
| R.1                              |               | E484K                           | D614G | W152L | G769V     |             | Multiple countries, Jan 2021 |
| B.1.466.2                        |               | N439K                           | D614G | P681R |           |             | Indonesia, Nov 2020          |
| B.1.1.318                        |               | E484K                           | D614G | P681H |           |             | Multiple countries, Jan 2021 |
| B.1.1.519                        |               | T478K                           | D614G |       |           |             | Multiple countries, Nov 2020 |
| C.36.3                           |               | R346S                           | L452R | D614G | Q677H     | A899S       | Multiple countries, Jan 2021 |
| B.1.214.2                        |               | Q414K                           | N450K | D614G | ins214TDR |             | Multiple countries, Nov 2020 |
| B.1.427, B.1.429 (Epsilon)       |               | L452R                           | D614G |       |           |             | USA, Mar 2020                |
| B.1.1.523                        |               | E484K                           | S494P | D614G | E780A     |             | Multiple countries, May 2020 |
| B.1.620                          |               | S477N                           | E484K | D614G | P681H     |             | Multiple countries, Nov 2020 |
| C.1.2                            |               | D614G                           | E484K | H655Y | N501Y     | N679K Y449H | South Africa, May 2021       |
| B.1.617.1 (Kappa)                |               | L452R                           | E484Q | D614G | P681R     |             | India, Oct 2020              |
| B.1.526 (Iota)                   |               | E484K                           | D614G | A701V |           |             | USA, Nov 2020                |
| B.1.525 (Eta)                    |               | E484K                           | D614G | Q677H |           |             | Multiple countries, Dec 2020 |
| B.1.630                          |               | E484K                           | L452R | S477N | P681H     |             | Dominican Republic, Mar 2021 |



| Vaccine and vaccine type                                    | Recommended dose and administration                                                                             | Study                                                                                      | Study type                        | N         | Vaccine effectiveness % (95% confidence interval) *       |                          |                        |  |  |
|-------------------------------------------------------------|-----------------------------------------------------------------------------------------------------------------|--------------------------------------------------------------------------------------------|-----------------------------------|-----------|-----------------------------------------------------------|--------------------------|------------------------|--|--|
|                                                             |                                                                                                                 |                                                                                            |                                   |           | Against                                                   | One dose                 | Two doses              |  |  |
| Pfizer/BioNTech (BNT162b2) – mRNA.                          | Two doses (30µg, 0.3ml each) intramuscularly (deltoid) with a recommended interval of 21-28 days between doses. | (156)                                                                                      | Placebo-controlled clinical trial | 37,706    | Symptomatic infection                                     |                          | 95% (90.3–97.6%)       |  |  |
|                                                             |                                                                                                                 | (197)                                                                                      | Observational                     | 1,193,236 | Documented infection                                      | 46% (40-51%)             | 92% (88-95%)           |  |  |
|                                                             |                                                                                                                 |                                                                                            |                                   |           | Symptomatic infection                                     | 57% (50-63%)             | 94% (87-98%)           |  |  |
|                                                             |                                                                                                                 |                                                                                            |                                   |           | Hospitalisation                                           | 74% (56-86%)             | 87% (55-100%)          |  |  |
|                                                             |                                                                                                                 |                                                                                            |                                   |           | Severe disease                                            | 62% (39-80%)             | 92% (75-100%)          |  |  |
|                                                             |                                                                                                                 | (198)                                                                                      | Test-negative case-control        | 19,109    | Infection with Alpha                                      | 47.5% (41.6–52.8%)       | 93.7% (91.6–95.3%)     |  |  |
|                                                             |                                                                                                                 |                                                                                            |                                   |           | Infection with Delta                                      | 35.6% (22.7–46.4%)       | 88.0% (85.3–90.1%)     |  |  |
|                                                             |                                                                                                                 | (199)                                                                                      | Test-negative case-control        | 213,758   | Infection with Beta                                       |                          | 75.0% (70.5-78.9%)     |  |  |
|                                                             |                                                                                                                 |                                                                                            |                                   |           | Infection with Alpha or Beta                              |                          | 97.4% (92.2-99.5%)     |  |  |
|                                                             |                                                                                                                 | (200)                                                                                      | Test-negative case-control        | 324,033   | Symptomatic infection                                     | 14-20 days: 48% (41-54%) | ≥7 days: 91% (89-93%)  |  |  |
|                                                             |                                                                                                                 |                                                                                            |                                   |           |                                                           | ≥14 days: 60% (57-64%)   |                        |  |  |
|                                                             |                                                                                                                 |                                                                                            |                                   |           |                                                           | 35-41 days: 71% (63-78%) |                        |  |  |
|                                                             |                                                                                                                 |                                                                                            |                                   |           | Hospital admission or death                               | 14-20 days: 62% (44-75%) | ≥7 days: 98% (88-100%) |  |  |
|                                                             |                                                                                                                 |                                                                                            |                                   |           |                                                           | ≥14 days: 70% (60-77%)   |                        |  |  |
|                                                             |                                                                                                                 |                                                                                            |                                   |           |                                                           | ≥35 days: 91% (73-97%)   |                        |  |  |
|                                                             |                                                                                                                 | [NOTE: Participants in this study received an mRNA vaccine (either BNT162b2 or mRNA-1273)] |                                   |           |                                                           |                          |                        |  |  |
|                                                             |                                                                                                                 | (201)                                                                                      | Test-negative case-control        | 682,071   | Symptomatic infection - ≥14 days - Alpha                  | 66% (95% CI: 64-68%)     |                        |  |  |
|                                                             |                                                                                                                 |                                                                                            |                                   |           | Symptomatic infection - ≥14 days – Beta or Gamma variants | 60% (52-67%)             |                        |  |  |
|                                                             |                                                                                                                 |                                                                                            |                                   |           | Symptomatic infection - ≥14 days – Delta                  | 56% (45-64%)             |                        |  |  |
|                                                             |                                                                                                                 |                                                                                            |                                   |           | Symptomatic infection - ≥7 days – Alpha                   |                          | 89% (86–91%)           |  |  |
|                                                             |                                                                                                                 |                                                                                            |                                   |           | Symptomatic infection - ≥7 days – Beta or Gamma           |                          | 84% (69–92%)           |  |  |
|                                                             |                                                                                                                 |                                                                                            |                                   |           | Symptomatic infection - ≥7 days – Delta                   |                          | 87% (64–95%)           |  |  |
| Against hospitalisation or death - ≥14 days – Alpha         | 80% (78-82%)                                                                                                    |                                                                                            |                                   |           |                                                           |                          |                        |  |  |
| Against hospitalisation or death - ≥14 days – Beta or Gamma | 77% (69-83%)                                                                                                    |                                                                                            |                                   |           |                                                           |                          |                        |  |  |
| Against hospitalisation or death - ≥14 days – Delta         | 78% (65-86%)                                                                                                    |                                                                                            |                                   |           |                                                           |                          |                        |  |  |
| Against hospitalisation or death - ≥7 days – Alpha          |                                                                                                                 |                                                                                            |                                   |           | 95% (92-97%)                                              |                          |                        |  |  |
| Against hospitalisation or death - ≥7 days – Beta or Gamma  |                                                                                                                 |                                                                                            |                                   |           | 95% (81-99%)                                              |                          |                        |  |  |
| (202)                                                       | Retrospective case-control                                                                                      | 119,463                                                                                    | Infection                         |           | ≥14 days: 86% (81-90.6%)                                  |                          |                        |  |  |
|                                                             |                                                                                                                 |                                                                                            | Hospitalisation                   |           | ≥14 days: 85% (73-93%)                                    |                          |                        |  |  |
|                                                             |                                                                                                                 |                                                                                            | Admission to an ICU               |           | ≥14 days: 87% (46-98.6%)                                  |                          |                        |  |  |

|  |       |                                           |                                               |                                      |                               |                             |
|--|-------|-------------------------------------------|-----------------------------------------------|--------------------------------------|-------------------------------|-----------------------------|
|  | (145) | Test-negative observational               | 400,827                                       | Infection with Alpha variant         |                               | 92% (90–93%)                |
|  |       |                                           |                                               | Infection with Delta variant         |                               | 79% (75–82%)                |
|  | (203) | Test-negative case-control                | 14,019                                        | Hospitalisation with Alpha variant   | 83% (62–93%)                  | 95% (78–99%)                |
|  |       |                                           |                                               | Hospitalisation with Delta variant   | 94% (46–99%)                  | 96% (86–99%)                |
|  | (181) | Placebo-controlled pivotal efficacy trial | 44,047                                        | Infection                            |                               | 91.1% (88.8–93.0%)          |
|  | (11)  | Test-negative case-control                | 156,930                                       | Infection                            |                               | 10–13 days: 70% (59–78%)    |
|  |       |                                           |                                               |                                      |                               | ≥14 days: 89% (85–93%)      |
|  |       |                                           |                                               |                                      |                               | 28–34 days: 61% (51–69%)    |
|  | (205) | Test-negative case-control                | 16,993                                        | Infection                            | 0–13 days: 14% (0–26%)        |                             |
|  |       |                                           |                                               |                                      | 14–20 days: 43% (30–53%)      |                             |
|  |       |                                           |                                               |                                      | 35–41 days: 75% (63–83%)      |                             |
|  |       |                                           |                                               | Infection - ≥21 days postvaccination |                               | 65% (58–71%)                |
|  |       |                                           |                                               | Infection - non-VOC                  |                               | 72% (58–81%)                |
|  |       |                                           |                                               | Infection - Alpha                    |                               | 67% (57–75%)                |
|  |       |                                           |                                               | Infection - Gamma                    |                               | 61% (45–72%)                |
|  | (206) | Test-negative case-control                | 5,8476                                        | Infection                            | ≥14 days: 70.3% (68.1–72.4%)  | ≥7 days: 85.5% (80.4–89.3%) |
|  | (207) | Case-control                              | 67,760                                        | Infection - ≥7 days                  |                               | 88% (81–92%)                |
|  |       |                                           |                                               | Infection - ≥7 days - Alpha          |                               | 86% (81–90%)                |
|  |       |                                           |                                               | Infection - ≥7 days - Beta/Gamma     |                               | 77% (63–86%)                |
|  | (208) | Test-negative case-control                | 1 dose:<br>906,078<br>2 doses:<br>877,354     | Infection - ≥14 days – Delta         | 65.5% (40.9–79.9%)            | 59.6% (50.7–66.9%)          |
|  |       |                                           |                                               | Severe disease or death - Delta      |                               | 97.3% (84.4–99.5%)          |
|  | (179) | Test-negative case-control                | 1 dose:<br>947,035<br><br>2 doses:<br>907,763 | Symptomatic infection                | 0–13 days: -5.5% (-12.9–1.4%) |                             |
|  |       |                                           |                                               |                                      | ≥14 days: 47.9% (43.6–51.9%)  |                             |
|  |       |                                           |                                               |                                      | 1 month: 81.5% (79.9–83.0%)   |                             |
|  |       |                                           |                                               |                                      | 2 months: 72.5% (69.6–75.1%)  |                             |
|  |       |                                           |                                               |                                      | 3 months: 70.6% (66.4–74.3%)  |                             |
|  |       |                                           |                                               |                                      | 4 months: 57.0% (48.6–64.0%)  |                             |
|  |       |                                           |                                               |                                      | 5 months: 12.0% (-6.1–27.1%)  |                             |
|  |       |                                           |                                               |                                      | 6 months: 12.8% (-9.1–30.3%)  |                             |
|  |       |                                           |                                               |                                      | ≥7 months: 27.8% (-1.4–48.7%) |                             |
|  |       |                                           |                                               | Hospitalisation and death            | 0–13 days: 7.5% (-11.9–23.6%) |                             |
|  |       |                                           |                                               |                                      | ≥14 days: 65.0% (55.0–72.8%)  |                             |
|  |       |                                           |                                               |                                      | 1 month: 95.9% (93.6–97.3%)   |                             |
|  |       |                                           |                                               |                                      | 2 months: 96.3% (92.9–98.0%)  |                             |
|  |       |                                           |                                               |                                      | 3 months: 93.4% (87.5–96.5%)  |                             |

|  |                                                                                        |                                                                                                       |                    |                                  |                                                                                                                       |                                |                                         |                    |                    |
|--|----------------------------------------------------------------------------------------|-------------------------------------------------------------------------------------------------------|--------------------|----------------------------------|-----------------------------------------------------------------------------------------------------------------------|--------------------------------|-----------------------------------------|--------------------|--------------------|
|  |                                                                                        |                                                                                                       |                    |                                  |                                                                                                                       | 4 months: 80.8% (56.9-91.4%)   |                                         |                    |                    |
|  |                                                                                        |                                                                                                       |                    |                                  |                                                                                                                       | 6 months: 81.8% (18.5-95.9%)   |                                         |                    |                    |
|  |                                                                                        |                                                                                                       |                    |                                  |                                                                                                                       | ≥7 months: 44.1% (-86.5-83.3%) |                                         |                    |                    |
|  |                                                                                        | (209)                                                                                                 | Prospective cohort | 23,324                           | Infection                                                                                                             | ≥21 days: 70% (55-85%)         | ≥7 days: 85% (74-96%)                   |                    |                    |
|  |                                                                                        | (210)                                                                                                 | Observational      | 186,109                          | Infection                                                                                                             |                                | ≥7 days: 95.3% (94.9-95.7%)             |                    |                    |
|  |                                                                                        |                                                                                                       |                    |                                  | Asymptomatic infection                                                                                                |                                | ≥7 days: 91.5% (90.7-92.2%)             |                    |                    |
|  |                                                                                        |                                                                                                       |                    |                                  | Symptomatic infection                                                                                                 |                                | ≥7 days: 97.0% (96.7-97.2%)             |                    |                    |
|  |                                                                                        |                                                                                                       |                    |                                  | Hospitalisation                                                                                                       |                                | ≥7 days: 97.2% (96.8-97.5%)             |                    |                    |
|  |                                                                                        |                                                                                                       |                    |                                  | Severe or critical infection                                                                                          |                                | ≥7 days: 97.5% (97.1-97.8%)             |                    |                    |
|  |                                                                                        |                                                                                                       |                    |                                  | Death                                                                                                                 |                                | ≥7 days: 96.7% (96.0-97.3%)             |                    |                    |
|  |                                                                                        | (211)                                                                                                 | Observational      | 10,428,783                       | Infection – Pre-Delta period                                                                                          |                                | ≥14 days: 74.2% (68.9-78.7%)            |                    |                    |
|  |                                                                                        |                                                                                                       |                    |                                  | Infection – Intermediate period                                                                                       |                                | ≥14 days: 66.5% (58.3-73.1%)            |                    |                    |
|  |                                                                                        |                                                                                                       |                    |                                  | Infection – Delta                                                                                                     |                                | ≥14 days: 52.4% (48.0-56.4%)            |                    |                    |
|  |                                                                                        | (212)                                                                                                 | Observational      | Delta: 2,840<br>Pre-Delta: 7,012 | Infection – Delta                                                                                                     |                                | 14–119 days: 85% (68-93%)               |                    |                    |
|  |                                                                                        |                                                                                                       |                    |                                  |                                                                                                                       |                                | 120–149 days: 81% (34-95%)              |                    |                    |
|  |                                                                                        |                                                                                                       |                    |                                  |                                                                                                                       |                                | ≥150 days: 73% (49-86%)                 |                    |                    |
|  |                                                                                        |                                                                                                       |                    |                                  | [NOTE only 65% of participants in this study received BNT162b2 (33% received mRNA-1273, and 2% received Ad26.COV2.S)] |                                |                                         |                    |                    |
|  |                                                                                        | (213)                                                                                                 | Observational      | 378                              | Infection – Beta                                                                                                      |                                | ≥7 days: 49% (14-69%)                   |                    |                    |
|  |                                                                                        |                                                                                                       |                    |                                  | Severe disease                                                                                                        |                                | ≥7 days: 86% (67-94%)                   |                    |                    |
|  |                                                                                        | (214)                                                                                                 | Observational      | 384,543                          | Infection – Alpha                                                                                                     | ≥21 days: 59% (52-65%)         |                                         |                    |                    |
|  |                                                                                        |                                                                                                       |                    |                                  | Infection – Delta                                                                                                     | ≥21 days: 57% (50-63%)         |                                         |                    |                    |
|  |                                                                                        |                                                                                                       |                    |                                  | Infection – Alpha                                                                                                     |                                | 0-13 days: 77% (66-84%)                 |                    |                    |
|  |                                                                                        |                                                                                                       |                    |                                  |                                                                                                                       | ≥14 days: 78% (68-84%)         |                                         |                    |                    |
|  |                                                                                        |                                                                                                       |                    |                                  | Infection – Delta                                                                                                     |                                | 0-13 days: 82% (75-87%)                 |                    |                    |
|  |                                                                                        |                                                                                                       |                    | ≥14 days: 80% (77-83%)           |                                                                                                                       |                                |                                         |                    |                    |
|  |                                                                                        | (215)                                                                                                 | Observational      | 224                              | Infection                                                                                                             |                                | 66.2% (2.3-88.3%)                       |                    |                    |
|  |                                                                                        |                                                                                                       |                    |                                  | Symptomatic infection                                                                                                 |                                | 25.6% (-157.8-78.5%)                    |                    |                    |
|  |                                                                                        |                                                                                                       |                    |                                  |                                                                                                                       |                                |                                         |                    |                    |
|  | Oxford University/<br>AstraZeneca (AZD1222) - Non-replicating adenovirus viral vector. | Two doses (0.5ml each) intramuscularly (deltoid) with a recommended interval window of 8 to 12 weeks. | (198)              | Test-negative case-control       | 19,109                                                                                                                | Infection - Alpha              | 48.7% (45.2–51.9%)                      | 74.5% (68.4–79.4%) |                    |
|  |                                                                                        |                                                                                                       |                    |                                  |                                                                                                                       |                                | Infection - Delta                       | 30.0% (24.3–35.3%) | 67.0% (61.3–71.8%) |
|  |                                                                                        |                                                                                                       |                    | (201)                            | Test-negative case-control                                                                                            | 682,071                        | Symptomatic infection - Alpha           | 64% (60-68%)       |                    |
|  |                                                                                        |                                                                                                       |                    |                                  |                                                                                                                       |                                | Symptomatic infection – Beta or Gamma   | 48% (28-63%)       |                    |
|  |                                                                                        |                                                                                                       |                    |                                  |                                                                                                                       |                                | Symptomatic infection - Delta           | 67% (44-80%)       |                    |
|  |                                                                                        |                                                                                                       |                    |                                  |                                                                                                                       |                                | Hospitalisation or death - Alpha        | 85% (81-88%)       |                    |
|  |                                                                                        |                                                                                                       |                    |                                  |                                                                                                                       |                                | Hospitalisation or death – Bet or Gamma | 83% (66-92%)       |                    |
|  |                                                                                        |                                                                                                       |                    |                                  | Hospitalisation or death - Delta                                                                                      | 88% (60-96%)                   |                                         |                    |                    |
|  |                                                                                        |                                                                                                       |                    | (145)                            | Test-negative observational                                                                                           | 462,755                        | Infection with Alpha variant            |                    | 73% (66-78%)       |
|  |                                                                                        | Infection with Delta variant                                                                          |                    |                                  |                                                                                                                       |                                | 60% (53-66%)                            |                    |                    |

|  |                                                                                                              |       |                             |         |                                       |                                        |                                 |  |
|--|--------------------------------------------------------------------------------------------------------------|-------|-----------------------------|---------|---------------------------------------|----------------------------------------|---------------------------------|--|
|  |                                                                                                              | (216) | Randomised controlled trial | 8,534   | Symptomatic infection – Alpha         |                                        | 70.4% (43.6-84%)                |  |
|  |                                                                                                              |       |                             |         | Symptomatic infection – non-Alpha     |                                        | 81.5% (67.9-89.4%)              |  |
|  |                                                                                                              | (217) | Randomised controlled trial | 32,449  | Symptomatic infection                 |                                        | 79%                             |  |
|  |                                                                                                              |       |                             |         | Severe disease or hospitalisation     |                                        | 100%                            |  |
|  |                                                                                                              | (203) | Test-negative case-control  | 14,019  | Hospitalisation – Alpha               | 76% (61-85%)                           | 86% (53-96%)                    |  |
|  |                                                                                                              |       |                             |         | Hospitalisation – Delta               | 71% (51-83%)                           | 92% (75-97%)                    |  |
|  |                                                                                                              | (218) | Randomised controlled trial | 11,636  | Infection                             |                                        | 62.1% (41.0-75.7%)              |  |
|  |                                                                                                              | (219) | Randomised controlled trial | 2,026   | Symptomatic infection                 |                                        | 21.9% (-49.9-59.8%)             |  |
|  |                                                                                                              |       |                             |         | Symptomatic infection - Beta          |                                        | 10.4% (-76.8-54.8%)             |  |
|  |                                                                                                              | (204) | Test-negative case-control  | 156,930 | Symptomatic infection                 |                                        | 28-34 days: 60% (41-73%)        |  |
|  |                                                                                                              |       |                             |         |                                       |                                        | ≥35 days: 73% (27-90%)          |  |
|  |                                                                                                              | (214) | Observational               | 384,543 | Infection - Alpha                     | ≥21 days: 63% (55–69%)                 | 0-13 days: 72% (50-84%)         |  |
|  |                                                                                                              |       |                             |         |                                       |                                        | ≥14 days: 79% (56–90%)          |  |
|  |                                                                                                              |       |                             |         | Infection Delta                       | ≥21 days: 46% (35–55%)                 | 0-13 days: 71% (64–77%)         |  |
|  |                                                                                                              |       |                             |         |                                       |                                        | ≥14 days: 67% (62–71%)          |  |
|  |                                                                                                              | (220) | Test-negative case-control  | 720     | Infection                             | 49% (17-68%)                           | 54% (27-71%)                    |  |
|  |                                                                                                              |       |                             |         | Symptomatic infection                 | 58% (28-75%)                           | 64% (38-78%)                    |  |
|  |                                                                                                              |       |                             |         | Moderately severe disease             | Any dosage >3 weeks ago: 95% (44-100%) |                                 |  |
|  |                                                                                                              |       |                             |         |                                       |                                        |                                 |  |
|  | Johnson & Johnson (Ad26.COV2.S) - Recombinant, replication-incompetent adenovirus serotype 26 (Ad26) vector. | (164) | Randomised controlled trial | 39,321  | Moderate to severe-critical infection | ≥14 days: 66.9% (59.0-73.4%)           |                                 |  |
|  |                                                                                                              |       |                             |         |                                       | ≥28 days: 66.1% (55.0-74.8%)           |                                 |  |
|  |                                                                                                              |       |                             |         |                                       | Severe-critical infection              | ≥14 days: 76.7% (54.6-89.1%)    |  |
|  |                                                                                                              |       |                             |         |                                       |                                        | ≥28 days: 85.4% (54.2-96.9%)    |  |
|  |                                                                                                              | (221) | Test-negative case-control  | 11,817  | Symptomatic infection                 | 14-27 days: 27.4% (8.7-42.7%)          |                                 |  |
|  |                                                                                                              |       |                             |         |                                       | ≥28 days: 50.9% (35.5-63.0%)           |                                 |  |
|  |                                                                                                              |       |                             |         |                                       | Hospitalisation                        | 14-27 days: 33.5% (-29.1-69.8%) |  |
|  |                                                                                                              |       |                             |         |                                       |                                        | ≥28 days: 72.9% (35.1-91.1%)    |  |
|  |                                                                                                              |       |                             |         |                                       | Admission to an ICU                    | 14-27 days: 56.0% (-52.8-93.1%) |  |
|  |                                                                                                              |       |                             |         |                                       |                                        | ≥28 days: 92.5% (54.9-99.6%)    |  |
|  |                                                                                                              |       |                             |         |                                       | Mechanical ventilation                 | 14-27 days: 65.2% (-74.7-98.1%) |  |
|  |                                                                                                              |       |                             |         |                                       |                                        | ≥28 days: 88.7% (17.9-99.5%)    |  |
|  |                                                                                                              |       |                             |         | Death                                 | 14-27 days: 48.9% (-92.3-92.5%)        |                                 |  |
|  |                                                                                                              |       |                             |         |                                       | ≥28 days: 90.5% (31.5-99.6%)           |                                 |  |
|  |                                                                                                              | (222) | Retrospective case-control  | 126,572 | Symptomatic infection                 | ≥1 day: 50.6% (14.0-74.0%)             |                                 |  |
|  |                                                                                                              |       |                             |         |                                       | ≥8 days: 65.5% (23.3-87.5%)            |                                 |  |
|  |                                                                                                              |       |                             |         |                                       | ≥15 days: 76.7% (30.3-95.3%)           |                                 |  |

|                                                                                                           |                                                                                                               |                                                                                                           |                            |                                           |                                                                                                    |                              |                              |
|-----------------------------------------------------------------------------------------------------------|---------------------------------------------------------------------------------------------------------------|-----------------------------------------------------------------------------------------------------------|----------------------------|-------------------------------------------|----------------------------------------------------------------------------------------------------|------------------------------|------------------------------|
|                                                                                                           |                                                                                                               | (223)                                                                                                     | Test-negative case-control | 1,000                                     | Symptomatic infection                                                                              | 51% (95% CI: -2-76%)         |                              |
|                                                                                                           |                                                                                                               | (212)                                                                                                     | Observational              | Delta:<br>2,840<br>Pre-Delta:<br>7,012    | Infection – Delta                                                                                  | 14–119 days: 85% (68-93%)    |                              |
|                                                                                                           |                                                                                                               |                                                                                                           |                            |                                           |                                                                                                    | 120–149 days: 81% (34-95%)   |                              |
|                                                                                                           |                                                                                                               |                                                                                                           |                            |                                           |                                                                                                    | ≥150 days: 73% (49-86%)      |                              |
|                                                                                                           |                                                                                                               |                                                                                                           |                            |                                           | Infection – Pre-Delta                                                                              | 91% (81-96%)                 |                              |
|                                                                                                           |                                                                                                               | [NOTE: 2% of study participants received Ad26.COVS.2 (65% received BNT162b2, and 33% received mRNA-1273)] |                            |                                           |                                                                                                    |                              |                              |
|                                                                                                           |                                                                                                               | (224)                                                                                                     | Cohort                     | 1,914,670                                 | Infection                                                                                          | 79% (77-80%)                 |                              |
|                                                                                                           |                                                                                                               |                                                                                                           |                            |                                           | Hospitalisation                                                                                    | 81% (79-84%)                 |                              |
| <b>Moderna (mRNA-1273) - mRNA</b>                                                                         | Two doses (100µg, 0.5ml each) intramuscularly (deltoid) with a recommended interval of 28 days between doses. | (201)                                                                                                     |                            |                                           | Symptomatic infection – Alpha                                                                      | ≥14 days: 83% (80-86%)       | ≥7 days: 92% (86-96%)        |
|                                                                                                           |                                                                                                               |                                                                                                           |                            |                                           | Symptomatic infection – Beta or Gamma                                                              | ≥14 days: 77% (63-86%)       |                              |
|                                                                                                           |                                                                                                               |                                                                                                           |                            |                                           | Symptomatic infection – Delta                                                                      | ≥14 days: 72% (57-82%)       |                              |
|                                                                                                           |                                                                                                               |                                                                                                           |                            |                                           | Hospitalisation - Alpha                                                                            | ≥14 days: 79% (74-83%)       | ≥7 days: 94% (89-97%)        |
|                                                                                                           |                                                                                                               |                                                                                                           |                            |                                           | Hospitalisation – Beta or Gamma                                                                    | ≥14 days: 89% (73-95%)       |                              |
|                                                                                                           |                                                                                                               |                                                                                                           |                            |                                           | Hospitalisation - Delta                                                                            | ≥14 days: 96% (72-99%)       |                              |
|                                                                                                           |                                                                                                               | (202)                                                                                                     | Retrospective case-control | 60,083                                    | Infection                                                                                          |                              | ≥14 days: 86% (81-90.6%)     |
|                                                                                                           |                                                                                                               |                                                                                                           |                            |                                           | Hospitalisation                                                                                    |                              | ≥14 days: 91.6% (81-97%)     |
|                                                                                                           |                                                                                                               |                                                                                                           |                            |                                           | Admission to an ICU                                                                                |                              | ≥14 days: 93.3% (57-99.8%)   |
|                                                                                                           |                                                                                                               | (206)                                                                                                     | Test-negative case-control | 5,8476                                    | Infection                                                                                          | ≥14 days: 68.7% (59.5-75.9%) | ≥7 days: 84.1% (34.9-96.1%)  |
|                                                                                                           |                                                                                                               | (208)                                                                                                     | Test-negative case-control | 1 dose:<br>490,828<br>2 doses:<br>409,041 | Infection - Delta                                                                                  | ≥14 days: 79.7% (60.8-89.5%) | ≥14 days: 86.1% (78.0-91.3%) |
|                                                                                                           |                                                                                                               | (211)                                                                                                     | Observational              | 10,428,783                                | Infection – Pre-Delta period                                                                       |                              | ≥14 days: 74.7% (66.2-81.1%) |
|                                                                                                           |                                                                                                               |                                                                                                           |                            |                                           | Infection – Intermediate period                                                                    |                              | ≥14 days: 70.4% (60.1-78.0%) |
|                                                                                                           |                                                                                                               |                                                                                                           |                            |                                           | Infection – Delta                                                                                  |                              | ≥14 days: 50.6% (45.0-55.7%) |
|                                                                                                           |                                                                                                               | (212)                                                                                                     | Observational              | Delta:<br>2,840<br>Pre-Delta:<br>7,012    | Infection – Delta                                                                                  |                              | 14–119 days: 85% (68-93%)    |
|                                                                                                           | 120–149 days: 81% (34-95%)                                                                                    |                                                                                                           |                            |                                           |                                                                                                    |                              |                              |
|                                                                                                           | ≥150 days: 73% (49-86%)                                                                                       |                                                                                                           |                            |                                           |                                                                                                    |                              |                              |
| Infection – Pre-Delta                                                                                     |                                                                                                               |                                                                                                           |                            |                                           | 91% (81-96%)                                                                                       |                              |                              |
| [NOTE: 33% of study participants received mRNA-1273 (2% received Ad26.COVS.2, and 65% received BNT162b2)] |                                                                                                               |                                                                                                           |                            |                                           |                                                                                                    |                              |                              |
| (214)                                                                                                     | Observational                                                                                                 | 384,543                                                                                                   | Infection - Delta          | 75% (64-83%)                              |                                                                                                    |                              |                              |
| (215)                                                                                                     | Observational                                                                                                 | 124                                                                                                       | Infection                  |                                           | 52.5% (26.9-69.1%)                                                                                 |                              |                              |
|                                                                                                           |                                                                                                               |                                                                                                           | Symptomatic infection      |                                           | 65.6% (33.8-82.1%)                                                                                 |                              |                              |
|                                                                                                           |                                                                                                               |                                                                                                           | Severe infection           |                                           | 78.6% (47.9-91.2%)                                                                                 |                              |                              |
| <b>Sinopharm BBIBP-CorV - Aluminium-</b>                                                                  | Two doses (0.5ml) intramuscularly (deltoid) with a                                                            | (225)                                                                                                     | Test-negative case-control | 366                                       | Infection                                                                                          | 13.8% (-60.2-54.8%)          | 59.0% (16.0-81.6%)           |
|                                                                                                           |                                                                                                               |                                                                                                           |                            |                                           | Moderately severe infection                                                                        |                              | 70.2% (29.6-89.3%)           |
|                                                                                                           |                                                                                                               |                                                                                                           |                            |                                           | [NOTE: 27.5% of study participants were vaccinated with Sinopharm BIBP (61.3% received CoronaVac)] |                              |                              |

|                                                                                                                  |                                                                                                                |       |                               |            |                                                                                                    |                                  |                                  |
|------------------------------------------------------------------------------------------------------------------|----------------------------------------------------------------------------------------------------------------|-------|-------------------------------|------------|----------------------------------------------------------------------------------------------------|----------------------------------|----------------------------------|
| hydroxide-<br>adjuvanted,<br>inactivated whole<br>virus vaccine                                                  | recommended interval<br>of 3 weeks between<br>doses.                                                           |       |                               |            |                                                                                                    |                                  |                                  |
|                                                                                                                  |                                                                                                                |       |                               |            |                                                                                                    |                                  |                                  |
| <b>Sinovac-<br/>CoronaVac</b> -<br>Aluminium-<br>hydroxide-<br>adjuvanted,<br>inactivated whole<br>virus vaccine | Two doses (0.5ml)<br>intramuscularly<br>(deltoid) with a<br>recommended interval<br>window of 2 to 4<br>weeks. | (225) | Test-negative<br>case-control | 366        | Infection                                                                                          | 13.8% (-60.2-54.8%)              | 59.0% (16.0-81.6%)               |
|                                                                                                                  |                                                                                                                |       |                               |            | Moderately severe infection                                                                        |                                  | 70.2% (29.6-89.3%)               |
|                                                                                                                  |                                                                                                                |       |                               |            | [NOTE: 61.3% of study participants were vaccinated with CoronaVac (27.5% recieved Sinopharm BIBP)] |                                  |                                  |
|                                                                                                                  |                                                                                                                | (226) | Observational                 | 10,187,720 | Infection                                                                                          | 17.2% (15.8-18.6%)               | 63.7% (62.8-64.6%)               |
|                                                                                                                  |                                                                                                                |       |                               |            | Hospitalisation                                                                                    | 40.3% (37.6-42.8%)               | 86.5% (85.6-87.4%)               |
|                                                                                                                  |                                                                                                                |       |                               |            | Admission to an ICU                                                                                | 45.3% (41.2-49.2%)               | 90.2% (88.9-91.4%)               |
|                                                                                                                  |                                                                                                                |       |                               |            | Death                                                                                              | 46.0% (40.7-50.8%)               | 86.7% (84.9-88.3%)               |
|                                                                                                                  |                                                                                                                | (227) | Test-negative<br>case-control | 43,774     | Symptomatic infection - Gamma                                                                      | 0-13 days: -0.8% (-9.4 to 7.2%)  | 0-13 days: 24.7% (14.7 to 33.4%) |
|                                                                                                                  |                                                                                                                |       |                               |            |                                                                                                    | ≥14 days: 12.5% (3.7 to 20.6%)   | ≥14 days: 46.8% (38.7 to 53.8%)  |
|                                                                                                                  |                                                                                                                |       |                               |            | Hospitalisation - Gamma                                                                            | 0-13 days: 6.6% (-4.3 to 16.3%)  | 0-13 days: 39.1% (28.0 to 48.5%) |
|                                                                                                                  |                                                                                                                |       |                               |            |                                                                                                    | ≥14 days: 16.9% (5.7 to 26.8%)   | ≥14 days: 55.5% (46.5 to 62.9%)  |
|                                                                                                                  |                                                                                                                |       |                               |            | Death - Gamma                                                                                      | 0-13 days: 13.1% (-1.5 to 25.6%) | 0-13 days: 48.9% (34.4 to 60.1%) |
| ≥14 days: 31.2% (17.6 to 42.5%)                                                                                  | ≥14 days: 61.2% (48.9 to 70.5%)                                                                                |       |                               |            |                                                                                                    |                                  |                                  |

| Vaccine type                 | Vaccine                                | Company                                                                           | Countries approved for use in                                                                           | Clinical trials                                                                                                                                                                                                                                                                                         |
|------------------------------|----------------------------------------|-----------------------------------------------------------------------------------|---------------------------------------------------------------------------------------------------------|---------------------------------------------------------------------------------------------------------------------------------------------------------------------------------------------------------------------------------------------------------------------------------------------------------|
| Inactivated virus            | <b>Covaxin</b>                         | Bharat Biotech (Hyderabad, India)                                                 | <b>9 countries:</b><br>Guyana, India, Iran, Mauritius, Mexico, Nepal, Paraguay, Philippines, Zimbabwe   | Phase 1:<br>NCT04471519 (India). CTRI/2020/09/027674 (India).<br>Phase 2:<br>CTRI/2020/07/026300, NCT04471519 (India).<br>CTRI/2020/09/027674 (India).<br>NCT04918797 (India).<br>Phase 3:<br>CTRI/2020/11/028976, NCT04641481 (India).<br>NCT04918797 (India).                                         |
|                              | <b>KoviVac</b>                         | Chumakov Center (Moscow, Russia)                                                  | <b>1 country:</b><br>Russian Federation                                                                 | Phase 1: 502 (Russian Federation)<br>Phase 2: 502 (Russian Federation)                                                                                                                                                                                                                                  |
|                              | <b>QazVac</b>                          | Kazakhstan Research Institute for Biological Safety Problems (RIBSP) (Kazakhstan) | <b>2 countries:</b><br>Kazakhstan, Kyrgyzstan                                                           | Phase 1: NCT04530357 (Kazakhstan)<br>Phase 2: NCT04530357 (Kazakhstan)<br>Phase 3: NCT04691908 (Kazakhstan)                                                                                                                                                                                             |
|                              | <b>SARS-CoV-2 Vaccine (Vero Cells)</b> | Minhai Biotechnology Co. (Beijing, China)                                         | <b>1 country:</b><br>China                                                                              | Phase 1:<br>NCT05003479 (China).<br>ChiCTR2000038804, NCT04758273 (China).<br>Phase 2:<br>ChiCTR2000039462, NCT04756323 (China).<br>NCT05003466 (China).<br>Phase 3: NCT04852705                                                                                                                        |
|                              | <b>COVID-19 Inactivated Vaccine</b>    | Shifa Pharmed Industrial Co. (Tehran, Iran)                                       | <b>1 country:</b><br>Iran                                                                               | Phase 1:<br>IRCT20201202049567N1 (Iran).<br>IRCT20201202049567N2 (Iran).<br>Phase 2: IRCT20201202049567N3 (Iran).<br>Phase 3: IRCT20201202049567N3 (Iran).                                                                                                                                              |
|                              | <b>Inactivated (Vero Cells)</b>        | Sinopharm (Wuhan, China)                                                          | <b>2 countries:</b><br>China, Philippines                                                               | Phase 1: ChiCTR2000031809 (China)<br>Phase 2:<br>NCT04885764 (Egypt).<br>ChiCTR2000031809 (China).<br>Phase 3:<br>NCT04885764 (Egypt).<br>ChiCTR2000034780 (United Arab Emirates).<br>NCT04612972 (Peru).<br>NCT04510207 (Bahrain, Egypt, Jordan, United Arab Emirates).<br>ChiCTR2000039000 (Morocco). |
| Non-replicating viral vector | <b>Ad5-nCoV</b>                        | CanSino (Tianjin, China)                                                          | <b>9 countries:</b><br>Argentina, Chile, China, Ecuador, Hungary, Indonesia, Malaysia, Mexico, Pakistan | Phase 1:<br>NCT05043259 (China).<br>ChiCTR2000030906, NCT04313127 (China).<br>NCT04568811 (China).<br>NCT04840992 (China).<br>Phase 2:<br>NCT05043259 (China).<br>NCT04840992 (China).                                                                                                                  |

|     |                                      |                                                                               |                                                                                                                                                                                                                                                                                                                                                                                                                                                                                                                                                                                                                                                                                                                                                                                                                                                                        |                                                                                                                                                                                                                                                                                                                                                                                                                                                                                                                                                                                                                                                                                                                                                                                                                        |
|-----|--------------------------------------|-------------------------------------------------------------------------------|------------------------------------------------------------------------------------------------------------------------------------------------------------------------------------------------------------------------------------------------------------------------------------------------------------------------------------------------------------------------------------------------------------------------------------------------------------------------------------------------------------------------------------------------------------------------------------------------------------------------------------------------------------------------------------------------------------------------------------------------------------------------------------------------------------------------------------------------------------------------|------------------------------------------------------------------------------------------------------------------------------------------------------------------------------------------------------------------------------------------------------------------------------------------------------------------------------------------------------------------------------------------------------------------------------------------------------------------------------------------------------------------------------------------------------------------------------------------------------------------------------------------------------------------------------------------------------------------------------------------------------------------------------------------------------------------------|
|     |                                      |                                                                               |                                                                                                                                                                                                                                                                                                                                                                                                                                                                                                                                                                                                                                                                                                                                                                                                                                                                        | ChiCTR2000031781, NCT04341389 (China).<br>NCT04566770 (China).<br>NCT05005156 (Argentina).<br>Phase 3:<br>NCT04526990 (Argentina, Chile, Mexico, Pakistan, Russian Federation).<br>NCT04540419 (Russian Federation).                                                                                                                                                                                                                                                                                                                                                                                                                                                                                                                                                                                                   |
|     | <b>Sputnik Light</b>                 | Gamaleya Research Institute of Epidemiology and Microbiology (Moscow, Russia) | <b>18 countries:</b><br>Angola, Armenia, Bahrain, Belarus, Egypt, Iran, Kazakhstan, Kyrgyzstan, Mauritius, Mongolia, Nicaragua, Philippines, Republic of the Congo, Russian Federation, United Arab Emirates, United Republic of Tanzania, Venezuela, West Bank                                                                                                                                                                                                                                                                                                                                                                                                                                                                                                                                                                                                        | Phase 1: NCT04713488 (Russian Federation).<br>Phase 2:<br>NCT04713488 (Russian Federation).<br>NCT05027672 (Argentina).<br>Phase 3: NCT04741061 (Russian Federation).                                                                                                                                                                                                                                                                                                                                                                                                                                                                                                                                                                                                                                                  |
|     | <b>Sputnik V</b>                     | Gamaleya Research Institute of Epidemiology and Microbiology (Moscow, Russia) | <b>72 countries:</b><br>Albania, Algeria, Angola, Antigua and Barbuda, Argentina, Armenia, Azerbaijan, Bahrain, Bangladesh, Belarus, Bolivia, Bosnia and Herzegovina, Brazil, Cameroon, Chile, Djibouti, Ecuador, Egypt, Gabon, Ghana, Guatemala, Guinea, Guyana, Honduras, Hungary, India, Indonesia, Iran, Iraq, Jordan, Kazakhstan, Kenya, Kyrgyzstan, Lao People's Democratic Republic, Lebanon, Libya, Maldives, Mali, Mauritius, Mexico, Mongolia, Montenegro, Morocco, Myanmar, Namibia, Nepal, Nicaragua, Nigeria, North Macedonia, Oman, Pakistan, Panama, Paraguay, Philippines, Republic of Moldova, Republic of the Congo, Russian Federation, Saint Vincent and the Grenadines, San Marino, Serbia, Seychelles, Sri Lanka, Syrian Arab Republic, Tunisia, Turkey, Turkmenistan, United Arab Emirates, Uzbekistan, Venezuela, Vietnam, West Bank, Zimbabwe | Phase 1:<br>NCT04760730 (United Arab Emirates).<br>NCT04684446 (Belarus, Russian Federation).<br>NCT04436471, 241 (Russian Federation).<br>NCT04437875 (Russian Federation).<br>Phase 2:<br>NCT05027672 (Argentina).<br>NCT04988048 (Argentina).<br>NCT04954092 (Russian Federation).<br>NCT04962906 (Argentina).<br>NCT04983537 (Argentina).<br>NCT04760730 (United Arab Emirates).<br>NCT04684446 (Belarus, Russian Federation).<br>NCT04686773 (Azerbaijan).<br>NCT04436471, 241 (Russian Federation).<br>NCT04437875 (Russian Federation).<br>NCT04587219 (Russian Federation).<br>NCT04640233 (India).<br>Phase 3:<br>NCT04564716 (Belarus).<br>NCT04530396 (Russian Federation).<br>NCT04642339 (Venezuela).<br>NCT04656613 (United Arab Emirates).<br>NCT04954092 (Russian Federation).<br>NCT04640233 (India). |
| RNA | <b>TAK-919 (Moderna formulation)</b> | Takeda (Tokyo, Japan)                                                         | <b>1 country:</b><br>Japan                                                                                                                                                                                                                                                                                                                                                                                                                                                                                                                                                                                                                                                                                                                                                                                                                                             | Phase 1: NCT04677660 (Japan)<br>Phase 2: NCT04677660 (Japan)                                                                                                                                                                                                                                                                                                                                                                                                                                                                                                                                                                                                                                                                                                                                                           |
| DNA | <b>ZyCoV-D</b>                       | Zydus Cadila (Ahmedabad, India)                                               | <b>1 country:</b><br>India                                                                                                                                                                                                                                                                                                                                                                                                                                                                                                                                                                                                                                                                                                                                                                                                                                             | Phase 1:<br>CTRI/2020/07/026352 (India)<br>CTRI/2021/03/032051 (India)<br>Phase 2:<br>CTRI/2020/07/026352 (India)<br>CTRI/2021/03/032051 (India)<br>Phase 3: CTRI/2021/01/030416 (India)                                                                                                                                                                                                                                                                                                                                                                                                                                                                                                                                                                                                                               |

1  
2  
3  
4  
5  
6  
7  
8  
9  
10  
11  
12  
13  
14  
15  
16  
17  
18  
19  
20  
21  
22  
23  
24  
25  
26  
27  
28  
29  
30  
31  
32  
33  
34  
35  
36  
37  
38  
39  
40  
41  
42  
43  
44  
45  
46



|                                                       |                 |                     |                                                                           |                                                            |                                                                                                                                                                                                                                                                                                                        |
|-------------------------------------------------------|-----------------|---------------------|---------------------------------------------------------------------------|------------------------------------------------------------|------------------------------------------------------------------------------------------------------------------------------------------------------------------------------------------------------------------------------------------------------------------------------------------------------------------------|
| 1<br>2<br>3<br>4<br>5<br>6<br>7<br>8<br>9<br>10<br>11 | Protein subunit | <b>ZF2001</b>       | Anhui Zhifei Longcom (Hefei, China)                                       | <b>3 countries:</b><br>China, Indonesia, Uzbekistan        | Phase 1:<br>NCT04445194 (China).<br>NCT04636333 (China).<br>NCT04550351, ChiCTR2000035691 (China).<br>NCT04961359 (China).<br>Phase 2:<br>NCT04466085 (China).<br>NCT04813562 (China).<br>Phase 3:<br>ChiCTR2000040153, NCT04646590 (China, Ecuador,<br>Indonesia, Pakistan, Uzbekistan).<br>ChiCTR2100050849 (China). |
| 12<br>13<br>14<br>15<br>16<br>17                      |                 | <b>CIGB-66</b>      | Center for Genetic Engineering and<br>Biotechnology (CIGB) (Havana, Cuba) | <b>4 countries:</b><br>Cuba, Nicaragua, Venezuela, Vietnam | Phase 1:<br>RPCEC00000345 (Cuba).<br>RPCEC00000346 (Cuba).<br>Phase 2:<br>RPCEC00000345 (Cuba)<br>RPCEC00000346 (Cuba).<br>Phase 3: RPCEC00000359 (Cuba).                                                                                                                                                              |
| 18<br>19<br>20                                        |                 | <b>EpiVacCorona</b> | FBRI (Koltsovo, Russia)                                                   | <b>2 countries:</b><br>Russian Federation, Turkmenistan    | Phase 1: NCT04527575 (Russian Federation).<br>Phase 2: NCT04527575 (Russian Federation).<br>Phase 3: NCT04780035 (Russian Federation).                                                                                                                                                                                 |
| 21<br>22<br>23<br>24<br>25<br>26<br>27                |                 | <b>MVC-COV1901</b>  | Medigen Biotechnology Corp. (Taipei<br>City, Taiwan)                      | <b>1 country:</b><br>Taiwan                                | Phase 1: NCT04487210 (Taiwan).<br>Phase 2:<br>NCT04695652 (Taiwan, Vietnam).<br>NCT04822025 (Taiwan).<br>NCT04951388 (Taiwan).<br>NCT05038618 (Taiwan).<br>NCT05048849 (Taiwan).<br>NCT05054621 (Taiwan).                                                                                                              |
| 28<br>29<br>30<br>31<br>32                            |                 | <b>COVAX-19</b>     | Vaxine/CinnaGen Co. (Iran)                                                | <b>1 country:</b><br>Iran                                  | Phase 1: NCT04453852 (Australia).<br>Phase 2:<br>IRCT20150303021315N23 (Iran).<br>NCT04944368, IRCT20150303021315N23 (Iran).<br>Phase 3: NCT05005559, IRCT20150303021315N24 (Iran).                                                                                                                                    |

**COVID-19: Virology, variants, and vaccines**

|                               |                                                                                                                                                                                                                                                                                                  |
|-------------------------------|--------------------------------------------------------------------------------------------------------------------------------------------------------------------------------------------------------------------------------------------------------------------------------------------------|
| Journal:                      | <i>BMJ Medicine</i>                                                                                                                                                                                                                                                                              |
| Manuscript ID                 | bmjmed-2021-000040.R1                                                                                                                                                                                                                                                                            |
| Article Type:                 | Specialist review                                                                                                                                                                                                                                                                                |
| Date Submitted by the Author: | 08-Feb-2022                                                                                                                                                                                                                                                                                      |
| Complete List of Authors:     | Young, Megan; Imperial College London, Faculty of Medicine<br>Crook, Harry; Imperial College London, Faculty of Medicine<br>Scott, Janet; University of Glasgow, Centre for Virus Research<br>Edison, Paul; Imperial College London, Faculty of Medicine; Cardiff University, School of Medicine |
| Keywords:                     | Covid-19, COVID-19, Virology                                                                                                                                                                                                                                                                     |
|                               |                                                                                                                                                                                                                                                                                                  |

SCHOLARONE™  
Manuscripts



I, the Submitting Author has the right to grant and does grant on behalf of all authors of the Work (as defined in the below author licence), an exclusive licence and/or a non-exclusive licence for contributions from authors who are: i) UK Crown employees; ii) where BMJ has agreed a CC-BY licence shall apply, and/or iii) in accordance with the terms applicable for US Federal Government officers or employees acting as part of their official duties; on a worldwide, perpetual, irrevocable, royalty-free basis to BMJ Publishing Group Ltd ("BMJ") its licensees and where the relevant Journal is co-owned by BMJ to the co-owners of the Journal, to publish the Work in this journal and any other BMJ products and to exploit all rights, as set out in our [licence](#).

The Submitting Author accepts and understands that any supply made under these terms is made by BMJ to the Submitting Author unless you are acting as an employee on behalf of your employer or a postgraduate student of an affiliated institution which is paying any applicable article publishing charge ("APC") for Open Access articles. Where the Submitting Author wishes to make the Work available on an Open Access basis (and intends to pay the relevant APC), the terms of reuse of such Open Access shall be governed by a Creative Commons licence – details of these licences and which [Creative Commons](#) licence will apply to this Work are set out in our licence referred to above.

Other than as permitted in any relevant BMJ Author's Self Archiving Policies, I confirm this Work has not been accepted for publication elsewhere, is not being considered for publication elsewhere and does not duplicate material already published. I confirm all authors consent to publication of this Work and authorise the granting of this licence.

## **COVID-19: Virology, variants, and vaccinations**

**Keywords:** Covid-19, Coronavirus, Virology, SARS-CoV-2 variants, Vaccines.

**Megan Young<sup>1†</sup>, Harry Crook<sup>1†</sup>, Janet Scott<sup>2</sup>, Paul Edison<sup>1,3,\*</sup>**

<sup>1</sup> Faculty of Medicine, Imperial College London, London, UK.

<sup>2</sup> Medical Research Council-University of Glasgow Centre for Virus Research, University of Glasgow, UK

<sup>3</sup> School of Medicine, Cardiff University, Cardiff, UK.

† Both authors contributed equally to the manuscript

\*Corresponding author:

Dr Paul Edison, MD, MRCP, PhD, FRCP, FRCPI,

Clinical Senior Lecturer and Professor,

Clinical Senior Lecturer, Imperial College London and Honorary Professor, Cardiff University, UK

Division of Neurology, Faculty of Medicine, Imperial College London

Level 2, Commonwealth Building,

Hammersmith Campus, Imperial College London,

Du Cane Road, London, W12 0NN, UK

Tel: +442075941081

E-mail: paul.edison@imperial.ac.uk

No authors have any competing interests.

## **Abstract**

As of 25th January 2022, there have been over 349 million confirmed cases of COVID-19, with over 5.59 million confirmed deaths associated with the SARS-CoV-2 virus. The COVID-19 pandemic has prompted an extensive, global effort to study the molecular evolution of the virus and develop vaccines to combat its spread. Although rigorous determination of SARS-CoV-2 infectivity remains elusive, due to the continuous evolution of the virus, steps have been made to understand its genome, structure, and emerging genetic mutations. The SARS-CoV-2 genome is composed of a number of open reading frames (ORFs) and structural proteins, including the spike protein, which is essential for entry into host cells. As of 25th January 2022, the WHO reports five variants of concern (VOC) two variants of interest (VOI) and three variants under monitoring (VUM). The mutations harboured in these variants confer an increased transmissibility, severity of disease, and escape from neutralising antibodies compared to the primary strain. The current vaccine strategy, including booster doses, provides protection from severe disease. As of 24th January 2022, there are 33 approved vaccines in use in 197 countries. In this review, we discuss the genetics, structure and transmission methods of SARS-CoV-2 and its variants, highlighting how mutations provide enhanced abilities to spread and inflict disease. We also outline the vaccines currently in use around the world, providing evidence for the immunogenicity and effectiveness of each.

## **1. Introduction**

There are seven coronaviruses that infect humans, all belonging to either alpha- or beta-coronavirus subgroups, including 229E (alpha), NL63 (alpha), OC43 (beta), and HKU1 (beta)(1). Over the last two decades, three notable beta-coronaviruses, severe acute respiratory syndrome coronavirus (SARS-CoV) in 2002, Middle East respiratory syndrome coronavirus (MERS-CoV) in 2011, and most recently, severe acute respiratory syndrome 2 (SARS-CoV-2) in 2019, have emerged and caused severe illness resulting in debilitating disease and worldwide fatalities. SARS-CoV-2 is the pathogen responsible for the current Coronavirus 2019 (COVID-19) pandemic and has caused more than 5.59 million deaths in approximately two years and resulted in multisystem illness in several million people(2).

All viruses change and mutate over time, with most changes having little to no impact. However, some mutations may alter its pathogenic or transmission potential and could, therefore, increase disease severity or hinder the effectiveness of vaccines and therapeutic strategies. The World Health Organisation (WHO) classify SARS-CoV-2 variants that increase transmissibility, disease severity or virulence, or decrease the effectiveness of public health measures, diagnostics, therapeutics, or vaccines as variants of concern (VOC). Variants with genetic changes that are predicted to enhance the virulence and transmissibility of the virus which have been identified to cause community transmission in multiple countries posing a possible risk to global public health are defined as variants of interest (VOI). Lastly, the WHO defines variants with genetic changes that are suspected to affect virus characteristics and have currently unclear phenotypic or epidemiological effects as variants under monitoring (VUM). VUM are not typically assigned a name until they are upgraded to VOI or VOC. The full working definitions of VOC, VOI and VUM can be found on the WHO 'tracking SARS-CoV-2 variants' website: [www.who.int/en/activities/tracking-SARS-CoV-2-variants/](http://www.who.int/en/activities/tracking-SARS-CoV-2-variants/)(3). As of 25th January 2022, the WHO reports five VOC; Alpha, Beta, Gamma, Delta and Omicron, two VOI; Lambda and Mu, and three VUM(3). Former VOC/VOI/VUM have been reclassified as 'formerly monitored variants' due to them either no longer circulating, having little impact on the epidemiological situation, or having no concerning properties(3). Since the beginning of the COVID-19 pandemic, the rapid

1  
2  
3 development of effective COVID-19 vaccines has taken place around the world. As of 24<sup>th</sup> January  
4 2022, there are 33 approved vaccines in use in 197 countries, with ten vaccines having gained  
5 emergency use listing approval from the WHO(4).  
6

7 In this review, we provide an overview of the genome and structure of SARS-CoV-2, describing  
8 how these elements allow the virus to infect and replicate inside of host cells, before outlining how  
9 certain mutations harboured by SARS-CoV-2 variants enhance these abilities. Next, we examine the  
10 current state of vaccine development around the world and provide evidence of the effectiveness of  
11 booster doses.  
12  
13

## 14 **2. Methods**

15 We searched PubMed and Embase databases for COVID-19-related articles published  
16 between 1<sup>st</sup> January 2020 and 25<sup>th</sup> January 2022 and for general coronavirus-related articles published  
17 from 1<sup>st</sup> January 2000 onwards. Our search terms included SARS-CoV-2, COVID-19, and specific terms  
18 including virology, genome, variants, and vaccine. Additional, specific search terms are outlined in  
19 supplementary file 1. We performed further manual searching for additional articles and data using  
20 relevant databases, including who.int, gov.uk, and ecdc.europa.eu/en. Due to the rapidly evolving  
21 nature of the literature involving SARS-CoV-2, we also searched preprint databases including MedRxiv  
22 and BioRxiv. Due to the various topics addressed here, studies were selected through different criteria,  
23 details of which can be found in supplementary file 1. Overall, studies were selected based on quality  
24 and journal reputation, with real-world studies with large sample sizes of greatest interest.  
25  
26  
27  
28  
29

## 30 **3. Viral transmission, clinical presentation, and genetic susceptibility of COVID-19**

31 SARS-CoV-2 is predominantly spread via respiratory droplet transmission, spreading between  
32 people through close contact, coughing, or sneezing. It has been documented that the virus can also  
33 spread through airborne transmission, fomite transmission, and via other modes, such as through  
34 biological material including urine and faeces, and through (5, 6). The SARS-CoV-2 virus may survive  
35 on surfaces or suspended in air droplets for some time. Indeed, on plastic, stainless steel, and glass  
36 surfaces, the half-life of the virus is around 5.3, 4.4, and 4.2 hours, respectively(7), with no difference  
37 seen between SARS-CoV-2 variants(8). Although SARS-CoV-2 can be detected on inanimate surfaces  
38 for hours and days, due to the evaporation of water droplets, the viruses' living environment, the  
39 concentration of the virus plummets rapidly(9). Protective measures, including using personal  
40 protective equipment (PPE), maintaining indoor ventilation, and disinfecting hands and surfaces, can  
41 effectively limit the spread of SARS-CoV-2(10).  
42  
43  
44  
45

46 Once inside the airways, SARS-CoV-2 can directly or indirectly infect ciliated, mucus-secreting,  
47 and club cells of bronchial epithelium, type 1 pneumocytes within the lungs, and the conjunctival  
48 mucosa(11). The clinical presentation of COVID-19 is non-specific, heterogeneous, and infection can  
49 result in a wide spectrum of symptoms. Following an incubation period of 4-14 days, symptoms  
50 develop ranging from mild to severe disease and, in some cases, can result in death(12). The most  
51 common COVID-19 symptoms include fever, cough, dyspnoea, and fatigue(13, 14), while myalgia,  
52 gastrointestinal issues, cognitive deficits, and other symptoms are reported. Asymptomatic individuals  
53 can also test positive for COVID-19(15, 16). Although the entire population is susceptible to COVID-19  
54 infection, some subgroups within the general population exist that are more susceptible to developing  
55 poorer clinical outcomes.  
56  
57

58 Risk factors associated with increased risk of hospitalisation, severe disease, and fatal  
59 outcome with COVID-19 have been identified. Older age(17-19), male sex(20, 21), non-white  
60

1  
2  
3 ethnicity(21, 22), comorbidities including diabetes, hypertension, and lung disease(18, 23-25),  
4 malignancy and immunodeficiency(26-28) have all been associated with more severe COVID-19. The  
5 duration of symptoms endured by COVID-19 patients, as well as the treatment they receive will also  
6 have profound influences on the severity of disease they experience and both the acute and long-term  
7 outcomes following recovery. The host genetic background is thought to have an influence on the  
8 susceptibility and severity of COVID-19, possibly explaining the broad spectrum of clinical  
9 manifestations that can develop in seemingly similar individuals. A study examining individuals with  
10 COVID-19 across numerous ancestry groups identified four gene loci associated with susceptibility to  
11 COVID-19; SLC6A20, RPL24, ABO, PLEKHA4, and nine associated with increased risk of severe COVID-  
12 19; LZTFL1, FOXP4, TMEM65, OAS1, KANSL1, TAC4 , DPP9, RAVR1, and IFNAR2(29). Meanwhile,  
13 genome-wide association studies spanning across Europe, the United States (US), and the United  
14 Kingdom (UK) identified a gene cluster on chromosome three (chr3p21.31) as being strongly linked  
15 with susceptibility and severity of COVID-19(30, 31). Polymorphisms in the angiotensin-converting  
16 enzyme 2 (ACE2) receptor and transmembrane protease serine 2 (TMPRSS2) have also been shown to  
17 enhance SARS-CoV-2 viral entry(32, 33), with differential polymorphisms seen across ethnic  
18 populations, which may partly explain why certain ethnic groups are more susceptible to severe  
19 COVID-19. Increased ACE2 receptor levels have also been associated with other risk factors of COVID-  
20 19 including smoking and increasing age(34). The utilisation of polygenetic risk scores (PRS) may be  
21 useful in determining an individual's risk for developing severe disease caused by COVID-19(35). A PRS  
22 infers a person's risk of susceptibility to, or development of a certain disease based on the total  
23 number of genomic variations they possess. Determining PRS with the inclusion of comorbidities, such  
24 as chronic obstructive pulmonary disease(36), or other aspects, such as coagulation factors(37), may  
25 improve the usefulness of PRS in determining a person's risk of severe COVID-19.  
26  
27  
28  
29  
30  
31  
32  
33

#### 34 **4. Virology of SARS-CoV-2**

35 SARS-CoV-2 is a positive-stranded ribonucleic acid (RNA) virus belonging to Coronaviridae  
36 family. Coronaviruses, which have crownlike appearances, are the largest known RNA viruses and are  
37 thought to primarily infect vertebrates(38, 39). SARS-CoV-2 belongs to the beta genus of the  
38 coronaviruses and has a genome varying from 29.8kb to 29.9kb in size(40). Human coronaviruses  
39 (HCoV) genomes consist of a variable number of open reading frames (ORFs). Following the typical 5'-  
40 3' order, the beginning two-thirds of the SARS-CoV-2 genome contains two ORFs, ORF1a and ORF1b  
41 which, inside the host cell, are translated at the rough endoplasmic reticulum into polyprotein 1a  
42 (pp1a) and polyprotein 1ab (pp1ab), respectively(40). These polyproteins are cleaved into 16 non-  
43 structural proteins (nsp); nsp1-11, from pp1a and nsp12-16, from pp1ab. The proteolytic release of  
44 nsp1 occurs rapidly, which enables it to interfere with translation processes of the host cell by inducing  
45 cellular mRNA degradation(41-43). Nsp2-16 contain the viruses' replication and transcription complex  
46 (RTC) and encode multiple enzymes with many functions including, proteases, helicase, polymerase,  
47 exo- and endo-nuclease, N7- and 2'O-methyltransferases, and de-ubiquitination enzymes(44, 45). The  
48 final third of HCoV genomes contain genes that encode structural and accessory proteins. The four  
49 major structural proteins encoded here are the nucleocapsid (N), membrane (M), envelope (E), and  
50 spike glycoprotein (S) proteins(46, 47). The N protein is associated with the viral RNA genome and is  
51 involved in RNA synthesis regulation and interacts with the M protein during viral budding(39, 48).  
52 The M protein is important for viral assembly, it contains a short N-terminal domain that projects onto  
53 the external surface of the envelope and a long internal C terminus(39). The E protein function is  
54 largely unknown; however, along with the N and M proteins, it is required for viral assembly and  
55  
56  
57  
58  
59  
60

1  
2  
3 release(47) . Lastly, the S protein gives coronaviruses their characteristic spikes that compose their  
4 crownlike appearance. This protein projects through the viral envelope, is heavily glycosylated, and  
5 regulates host cell membrane receptor binding and fusion of the viral and cellular membrane(49). The  
6 functions of the eleven accessory proteins encoded within the one-third closest to the 3' end of the  
7 SARS-CoV-2 genome are not fully understood. These accessory proteins are encoded by the ORF3a,  
8 ORF3b, ORF3c, ORF3d, ORF6, ORF7a, ORF7b, ORF8, ORF9b, ORF9c, and ORF10 genes. Some of these  
9 proteins, including ORF3b, ORF6, ORF7a and ORF8 are interferon antagonists which impair the host  
10 cell immune response(50-53), while ORF3a may promote virus release(54) and is involved in apoptosis  
11 of host cells through caspase-3 activation(55). ORF9b and ORF9c are known to suppress the host  
12 antiviral response by interacting with host cell organelles(56-58), while a clear understanding of the  
13 functions of ORF3c, ORF7b, and ORF10 remains elusive(59). **Figure 1** (A and B) depicts the genome  
14 and structure of SARS-CoV-2.

15  
16 The S glycoprotein is composed of two functionally distinct subunits (S1 and S2) and  
17 is essential for viral entry into host cells. The N-terminal S1 domain of the protein contains the  
18 receptor-binding domain (RBD) that directly interacts with the ACE2 receptor on the host cell, the  
19 primary receptor that SARS-Cov-2 utilises for cell entry(60). The C-terminal S2 domain fuses the host  
20 and viral membranes to allow for entry of the viral genome into the host cell(61). The subunits of the  
21 trimeric S complex are either in a closed (pre-fusion stage) or open (post-fusion stage)  
22 conformation(62), with one subunit always in an open conformation to allow for ACE2 recognition and  
23 binding(63). The RBD itself consists of five anti-parallel  $\beta$ -strands surrounded by several  $\alpha$ -helices(64).  
24 From closed to open conformation, the RBD undergoes structural rearrangement whereby the  
25 globular head region rotates clockwise, which alters its electropotential surface(64). Once positioned,  
26 numerous residues within the RBD form either hydrogen bonds or salt bridges with residues of the  
27 ACE2 receptor, allowing for tight binding(65), while the concave structure of the RBD allows for three  
28 distinct binding regions(64). Following binding between the S protein and the host cell receptor, host  
29 cell proteases cleave the S protein, causing the release of the S2 domain which allows for fusion and  
30 cell entry(66). **Figure 1** (C and D) demonstrate the structure and function of the S protein.

31  
32 The ACE2 receptor is expressed in numerous cell types throughout the human body, including  
33 in the lungs, oral and nasal mucosa, heart, gastrointestinal tract, kidneys, liver, spleen, and brain(67),  
34 highlighting the widespread infection that SARS-CoV-2 can inflict. Meanwhile, TMPRSS2, a host cell  
35 protease, facilitates fusion of the viral and host cell membranes(68), and may play a role in the spread  
36 of the virus in the airways(68). Host cell cathepsin L may also aid in SARS-CoV-2 cell entry by cleaving  
37 the S protein(69). Indeed, a clinically approved protease inhibitor has been shown to block SARS-CoV-2  
38 cell entry(70). **Figure 2** depicts the mechanism by which SARS-CoV-2 gains entry into and replicates  
39 inside host cells, and overviews the host cell immune response.

## 40 **5. Variants of SARS-CoV-2**

41  
42 Most viral mutations have a limited impact on the viruses' ability to infect, replicate, escape  
43 host immunity, and transmit, however, certain mutations may give a viral strain a competitive  
44 advantage and, through natural selection, give it the ability to become dominant. Many of the  
45 mutations observed in SARS-CoV-2 variants are found within the RBD or the N-terminal domain of the  
46 S protein, which alters the three-dimensional structure of the S protein. Not only can these changes  
47 affect the transmission abilities of the virus but can also allow it to better escape the immune  
48 response, including from neutralising antibodies either elicited through vaccine administration or  
49 natural infection. The SARS-CoV-2 virus has mutated numerous times, with estimates suggesting that  
50



1  
2  
3 circulating lineages acquire nucleotide mutations at rates of around one to two mutations per  
4 month(71). The current method of identifying variants relies on the use of genomic testing such as  
5 whole genome sequencing, partial S-gene sequencing, or nucleic acid amplification technique (NAAT)-  
6 based assays(72). The aspects of different variants that most people experience, however, is the  
7 clinical symptoms they inflict. Certain variants induce a greater risk of severe disease and death, such  
8 as Alpha and Delta(73), while others are more likely to induce milder symptoms, such as Omicron(74,  
9 75). Moreover, individual symptoms can differ between variants. For example, the Gamma variant is  
10 associated inflicting anosmia and dysgeusia(76), which is less commonly seen in Omicron infections.  
11 Moving forward, the clinical themes and symptoms associated with emerging variants should be  
12 elucidated rapidly in order for the public and healthcare professionals to rapidly identify possible cases  
13 of COVID-19.  
14

15  
16  
17 The WHO have tracked and monitored SARS-CoV-2 variants since the COVID-19 pandemic  
18 began to identify VOCs. As of 25<sup>th</sup> January 2022, the WHO reports five VOC, two VOI, and three VUM(3)  
19 (**Table 1**). Herein, we report studies that compare SARS-CoV-2 variants to the 'primary' virus strain.  
20 'Primary strain' refers to the strain of the virus that first emerged in Wuhan, China at the end of 2019  
21 and spread around the world in the first wave of infections, which is often also referred to as the  
22 Wuhan-Hu-1, B.1, or wild-type strain.  
23  
24

## 25 26 **5.1 Variants of concern**

### 27 **5.1.1 Alpha**

28  
29 The Alpha SARS-CoV-2 variant, of the B.1.1.7 lineage, was first documented in the UK  
30 in September 2020 and classified as a VOC on 18<sup>th</sup> December 2020(3, 77). This variant contains S  
31 protein mutations which have potential biological effects. Firstly, the S protein residue 501, a key  
32 contact residue within the RBD, forms a portion of the binding loop in the contact region of the ACE2  
33 receptor, forms a hydrogen bond with the Y41 residue of the ACE2 receptor, and stabilises the ACE2  
34 K353 residue(65, 78, 79). Alpha harbours an N501Y mutation which increases the binding affinity of  
35 the RBD to the ACE2 receptor(80). Next, the P681H mutation contained within the Alpha variant is  
36 located immediately adjacent to the 682-685 furin cleavage site, at the interface of the S1 and S2  
37 domains(81). The S1/S2 furin cleavage site prompts entry into respiratory epithelial cells and partly  
38 determines the transmissibility of the virus(82-84), while the P681H mutation makes the furin  
39 cleavage site less acidic, meaning it is more effectively recognised and cleaved(85, 86). Alpha also  
40 contains a D614G mutation, located within the S1/S2 furin cleavage site, which increases SARS-CoV-2  
41 binding affinity to the ACE2 receptor and increases infectivity(87). Other mutations harboured within  
42 the Alpha variant enhance the ability of the virus to escape antibody detection, such as the two amino  
43 acid deletion at the sites 69-70 in the N-terminal domain of the S protein(88, 89), while other  
44 mutations demonstrate limited or no effects(90). In February 2021, viruses of the B.1.1.7 lineage with  
45 the added S protein mutation E484K were identified, which may have threatened vaccine  
46 effectiveness due to the mutation conferring an increased resistance to neutralising vaccine-elicited  
47 and monoclonal antibodies(91). This mutation had limited effects, however, and variants containing  
48 it failed to dominate.  
49

50  
51  
52 Epidemiological studies explored the Alpha variant, with a study in Madrid, Spain finding that  
53 the probability of admission to an intensive care unit (ICU) was twice as high in patients infected with  
54 the Alpha variant compared to those infected with the primary strain, while this variant became the  
55 dominant strain within four months, and led to an increase in disease burden as a result(92).  
56 Meanwhile in Cannes, France, infection with the Alpha variant was associated with a 3.8-fold higher  
57  
58  
59  
60

1  
2  
3 risk of transfer to an ICU or death compared to the primary strain(93). During the third COVID-19 wave  
4 in Ontario, Canada, where 91% of infections were caused by the Alpha variant, the risk of both  
5 hospitalisation (adjusted odds ratio (aOR)=1.57) and death (aOR=1.52) was higher compared to  
6 primary strain infections(94). Overall, the Alpha variant was approximately 50-70% more transmissible  
7 and was associated with a 30-60% increased risk of hospitalisation and death compared to the primary  
8 strain(95-100).  
9  
10

11 The Alpha variant was found to have a minimal impact on the effectiveness of current  
12 vaccines(101, 102), while the risk of reinfection remained similar for this variant as with previous  
13 ones(103). On 3<sup>rd</sup> September 2021, the European Centre for Disease Prevention and Control (ECDC)  
14 reclassified the Alpha, and the Alpha+E484K mutation variants from a VOC to a 'de-escalated variant'  
15 (104).  
16  
17  
18

### 19 **5.1.2 Beta**

20 The Beta SARS-CoV-2 variant, of the B.1.351 lineage, was first documented in South Africa in  
21 May 2020(3). This variant contains five S protein mutations of interest: N501Y, E484K, D614G, K417N,  
22 and A701V. Like the Alpha variant, Beta contains the mutations N501Y, E484K, and D614G, which  
23 increase ACE2 receptor binding affinity(80, 87), increase virulence(105), and enhance resistance to  
24 neutralising antibodies(91, 106). The K417 residue of the SARS-CoV-2 S protein interacts with the D30  
25 residue of the ACE2 receptor, forming a salt bridge across the central contact region(65, 78), however,  
26 the K417N mutation appears to have a limited impact on ACE2 receptor binding(80). The A701V  
27 mutation is located close to the furin cleavage site but has a minimal impact on transmissibility or  
28 antibody resistance(101).  
29  
30  
31

32 In a genomic and epidemiological study, it was concluded that the Beta SARS-CoV-2 variant  
33 had a selective advantage over previous variants from its increased transmissibility and immune  
34 escape abilities(107, 108), while the E484K/N501K mutations significantly enhanced the binding  
35 affinity of Beta and, hence, increased its transmissibility(109). A retrospective cohort study found that  
36 infection with the Beta variant was associated with an increased hospitalisation risk compared to an  
37 infection with a non-VOC (hazard ratio (HR)=2.30)(100). Overall, Beta is approximately 25-50% more  
38 transmissible, is associated with a possible increase in risk of hospital mortality, and has enhanced  
39 resistance to antibody neutralisation compared to previous variants(107, 108, 110).  
40  
41  
42

### 43 **5.1.3 Gamma**

44 The Gamma variant is of the P.1 lineage and was first reported in November 2020 from  
45 travellers returning to Japan from Brazil, and was later discovered in Brazil(3, 111). This variant  
46 contains the S protein mutations of interest; K417T, E484K, N501Y, D614G, and H655Y(104). As  
47 mentioned, the N501Y and D614G mutations increase ACE2 receptor binding affinity and increase  
48 infectivity of the virus(80, 87). The N501Y, K417N/T, and E484K mutation trinity, meanwhile, is shared  
49 by both Gamma and Beta variants, and is associated with enhanced infectivity and lethality compared  
50 to the N501Y mutation alone, possibly due to tighter binding of the S protein to the ACE2 receptor  
51 due to increased electrostatic contribution(112). Gamma also possesses the H655Y mutation which  
52 was found to provide enhanced viral escape abilities from multiple human monoclonal antibodies *in*  
53 *vitro*(113).  
54  
55  
56

57 The Gamma variant is associated with heightened transmissibility(109, 110, 114), with one  
58 study concluding that it possesses a 1.7- to 2.4-fold increased transmissibility compared to previous  
59 variants(115). Additionally, the wave of infections caused by the Gamma variant in Brazil was  
60

1  
2  
3 associated with a 13% increase in death rate compared to the previous wave, suggesting the greater  
4 virulence held by Gamma compared to previous viral strains(116). A surveillance study from seven  
5 European countries concluded that the Gamma variant was associated with a higher risk of  
6 hospitalisation (aOR=2.6) and admission to an ICU (aOR=2.2) when compared to non-VOC cases(117).  
7 In Manaus, Brazil the resurgence of COVID-19, despite high seroprevalence, suggested that the  
8 Gamma variant had a moderate resistance to neutralising antibodies(118), however, Gamma has been  
9 shown to be significantly less resistant to neutralising antibodies, compared to other variants,  
10 including Beta(119).  
11  
12  
13  
14

#### 15 **5.1.4 Delta**

16 The Delta variant, from the B.1.617.2 lineage, was first documented in India in October 2020  
17 and was classified as a VOC on 11<sup>th</sup> May 2021(3). Of the S protein mutations of interest, the  
18 aforementioned P681H and D614G are also harboured by the Delta variant(104) and similarly impacts  
19 its ACE2 receptor binding affinity and transmissibility(106, 120, 121). Unlike the E484K mutation seen  
20 in previous variants, Delta contains the E484Q mutation which, along with a L452R mutation also  
21 located within the RBD, causes significantly higher affinity for the ACE2 receptor than the primary  
22 strain or the E484K mutation alone(122). The L452R mutation alone results in greater RBD-ACE2  
23 receptor binding affinity and enhanced escape from neutralising antibodies(123, 124). Lastly, the Delta  
24 variant contains the T478K mutation, located on the interface between the S protein and the ACE2  
25 receptor when bound, which increases the electrostatic potential of the S protein and enhances  
26 binding affinity(125).  
27  
28  
29

30 The Delta variant quickly became the dominant variant in the UK(126), US(127), Europe, and  
31 around the world(128). The mutations present in the Delta variant, enhanced the transmissibility of  
32 the virus as a result of increased binding affinity to the ACE2 receptor(109). It was estimated that the  
33 reproduction number of the Delta variant is 97% greater than non-VOC/VOI and approximately three  
34 times that of the Alpha, Beta, and Gamma variants(110), which highlights the competitive advantage  
35 that this variant had over earlier ones and how it rapidly became the dominant strain globally. The  
36 fast replication rate of Delta likely contributes to its increased transmissibility compared to Alpha,  
37 Beta, and Gamma. From infected individuals, the Delta variant has been able to be detected by  
38 polymerase chain reaction (PCR) within the first four days from exposure, while non-Delta infections  
39 could only be detected after six days(129). Furthermore, viral loads of people infected with the Delta  
40 variant were found to be significantly higher than people infected with other strains(129), including  
41 Beta(130). Delta is also thought to better escape neutralisation, with the frequency of post-vaccination  
42 infections much higher for the Delta variant than infections with the primary strain in India(131) and  
43 blood sera samples from individuals who had received one dose of a COVID-19 vaccine showing  
44 minimal neutralisation of the Delta variant(132).  
45  
46  
47  
48  
49

50 The Delta variant is also associated with an increased disease severity. In Scotland, infection  
51 with the Delta variant was associated with an increased risk of hospitalisation (HR=1.85) compared to  
52 infection with the Alpha variant(133). Compared to non-VOC infections, North American studies  
53 demonstrated that infection with Delta was associated with a 108%(134) or HR=2.3(100) increased  
54 risk of hospitalisation, a 234% increased risk for admission to an ICU, and a 132% increased risk of  
55 death(134). Lastly, a study in India found that the risk of death was around 1.8 times higher for Delta  
56 infections, while Delta also infected and induced symptoms in a greater proportion of younger people  
57 (0-19 years old), compared to the primary strain(131).  
58  
59  
60

### 5.1.5 Omicron

The Omicron variant is of the B.1.1.529 lineage and was first discovered in November 2021 in South Africa and Botswana before being detected in multiple countries and classified as a VOC on 26<sup>th</sup> November 2021(3). This variant contains over 30 S protein mutations(104), 23 of which have been previously identified, including K417N, T478K, E484A, D614G, H655Y, P681H, and N501Y(135). 15 Omicron mutations are contained within the RBD(17) providing the variant with a significantly enhanced binding affinity to the ACE2 receptor(135, 136). In addition, various single mutations harboured with the RBD of the Omicron variant impair the effectiveness of neutralising antibodies, including K417N, N440K, G446S, E484A, Q493K, G496S, G339D, S371L, and S375F(17).

The emergence of Omicron has been followed by a tidal wave of infections worldwide. Early data from South Africa demonstrated that the proportion of COVID-19 cases caused by the Omicron variant rose from 3% in early October, to 98% by early December(137). In late December 2021, meanwhile, the doubling time for number of positive Omicron cases was between two and three in the UK, US, and much of Europe(138, 139), highlighting the transmissibility of this variant. The mutations harboured by Omicron that enhance its binding affinity(135, 136) and ability to escape neutralising antibodies(17) likely drove its rapid spread, as did its fast replication rate, which is around 70 times faster than the Delta and primary strains(140). The reinfection rate of Omicron has also been found to be significantly higher than that of previous variants in studies from Scotland(141) and South Africa(142).

The Omicron variant has extensive but incomplete escape from naturally acquired and vaccine-induced immunity(143, 144). Compared to the Delta variant, Omicron requires around a ten-fold increased antibody titre to be neutralised, following vaccination with either Oxford-AstraZeneca or Pfizer/BioNtech vaccines(145). Indeed, blood sera from individuals who had received two doses of the Pfizer/BioNtech vaccine exhibited more than a 25-fold reduction in neutralising antibody titres against the Omicron variant compared to the primary strain(146). T-cell responses to Omicron may remain intact, however. One preprint study demonstrated that 70-80% of the T-cell response targeting the S protein was maintained in those vaccinated or with prior infection, while the magnitude of Omicron cross-reactive T-cells was like that of both Delta and Beta variants(147). Furthermore, data from Pfizer/BioNtech revealed that 80% of the epitopes in the Omicron variant S protein that are recognised by CD8+ T-cells were not affected by this variant's mutations, following two-doses of the vaccine(146). T-cell responses induced from vaccine administration or prior infection may, therefore, provide some protection from severe disease.

Recent real-world evidence has implied that Omicron infection is milder in severity than previous variants. In an early South African analysis, the risk of hospitalisation (aOR=0.2) was lower for Omicron infections compared to non-Omicron SARS-CoV-2 infections(137) while, compared to earlier infections associated with the Delta variant, Omicron-infected individuals had a lower risk of severe disease (aOR=0.3)(137). In December 2021 in England, Omicron cases were found to induce a significantly reduced risk of hospitalisation or presentation for emergency care in comparison to Delta cases(74, 75). The decreased disease severity inflicted by Omicron may be due to its reduced capacity for replication in lung tissue, which was found to be more than ten times less in lung tissue compared to Delta(140). Concordantly, the S protein of the Omicron variant is less efficient at cleaving the ACE2 receptor and entering cells of lung organoids(145), while is also less able to cause fusion between lung cells compared to Delta(145), which is often observed in cases of severe COVID-19. The reduction in replication within the lungs, and the preservation of T-cell responses likely contribute to the milder disease exerted by the Omicron variant.

1  
2  
3  
4  
5  
6  
7  
8  
9  
10  
11  
12  
13  
14  
15  
16  
17  
18  
19  
20  
21  
22  
23  
24  
25  
26  
27  
28  
29  
30  
31  
32  
33  
34  
35  
36  
37  
38  
39  
40  
41  
42  
43  
44  
45  
46  
47  
48  
49  
50  
51  
52  
53  
54  
55  
56  
57  
58  
59  
60

Although the Omicron variant appears to manifest in mild disease, high case numbers may still result in many hospitalisations and deaths in those vulnerable to the virus. Omicron case numbers may be beginning to peak, however. In South Africa, a 29.7% decrease in weekly COVID-19 cases were reported in the week ending 25<sup>th</sup> December 2021, compared to the previous week, and the Omicron wave is said to have passed(148). Concerningly, global case numbers continue to rise rapidly(149) and many countries will continue to feel the pressure exerted by the wave of Omicron infections.

## 5.2 Variants of interest

### 5.2.1 Lambda

The Lambda variant, of the C.37 lineage, was first documented in Peru in December 2020 and was designated as a VOI on 14<sup>th</sup> June 2021(3). This variant contains the S protein mutations; D614G, L452Q, and F490S(104). The L452Q mutation, located within the RBD, enhances binding affinity to the ACE2 receptor and increases the infectivity of Lambda(150), while, together L452Q and F490S increase the resistance of this variant to vaccine-elicited antibody neutralisation(150). Furthermore, F490S was identified as being a high-risk mutation for enhancing abilities to escape neutralisation(150).

Infectivity of the Lambda variant may be higher than that of Alpha, Gamma, and other D614G containing variants(151), suggesting that Lambda could potentially spread more rapidly and effectively. Additionally, compared to the primary SARS-CoV-2 virus, antibody neutralisation was found to be decreased by 3.05-fold for the Lambda variant, higher than that for Gamma (2.33-fold) and Alpha (2.03-fold) variants(151). However, findings suggest that the Lambda variant can be neutralised by monoclonal antibodies and current vaccines are protective against this variant(150).

### 5.2.2 Mu

The Mu variant, from the B.1.621 lineage, was first documented in Columbia in January 2021 before receiving designation as a VOI on 30<sup>th</sup> August 2021(3). This variant contains the aforementioned S protein mutations E484K, N501Y, D614G, and P681H(104). Mu also contains the S protein mutation R346K, located within the RBD(104, 152), which may induce large binding free energy changes that disrupt the binding of antibodies to the S protein and enhance the ability of the variant to escape neutralisation(153). As discussed, the E484K, N501Y, D614G, and P681H mutations have been shown to increase transmissibility(80, 85, 87, 105, 109, 112, 120, 121) and neutralisation escape(91, 106) suggesting that the Mu SARS-CoV-2 variant is likely to be more infectious than the primary strain.

Although the Lambda and Mu variants have been outcompeted by Delta and now Omicron, the development and spread of VOIs will need to be closely monitored and studied to appreciate their pathogenicity, transmissibility, and virulence.

## 5.3 VUM

As of 25<sup>th</sup> January 2022, there are three VUM listed by the WHO(3) (*table 1*).

## 6. Vaccinations

The COVID-19 pandemic prompted a rapid international search for safe and effective vaccines against the SARS-CoV-2 virus. In line with previous vaccine development, including for both SARS-CoV

1  
2  
3 and MERS-CoV, the S protein was a key target for COVID-19 vaccine development(154). As of 24<sup>th</sup>  
4 January 2022, 33 approved vaccines are in use in 197 countries, with ten vaccines having gained  
5 emergency use listing approval from the WHO(4), (**table 2**). As of 25<sup>th</sup> January 2022 there are 194  
6 vaccines in pre-clinical development and 140 in clinical development(155). Numerous studies have  
7 explored the effectiveness of approved vaccines, however, large variations in vaccine effectiveness  
8 are reported. This variability is likely due to several factors in the studies including, the country, date,  
9 and population size of the study, as well as the SARS-CoV-2 variants circulating during the study period.  
10 These factors, along with how the effectiveness is reported, mean that it is difficult to compare  
11 vaccines and fully understand how effective each vaccine is. Here, we review the COVID-19 vaccines  
12 in use around the world.  
13  
14  
15

### 16 17 **6.1 Pfizer/BioNTech - BNT162b2**

18 The BNT162b2 vaccine (Comirnaty) is a lipid nanoparticle-formulated, nucleoside-modified  
19 mRNA vaccine encoding a modified SARS-CoV-2 S protein which was developed through a  
20 collaborative effort between Pfizer (New York, US) and BioNTech (Mainz, Germany)(156, 157).  
21 BNT162b2 gained WHO emergency use listing on 31<sup>st</sup> December 2020(158) and, as of 24<sup>th</sup> January  
22 2022, has been approved for use in 136 countries(4).  
23  
24

25 Following administration of BNT162b2, a Th1-biased response is observed, with tumour  
26 necrosis factor alpha (TNF $\alpha$ ), interferon gamma (IFN $\gamma$ ), and interleukin-2 (IL-2) all elevated following  
27 vaccination, compared to placebo(159, 160). Highest neutralisation titres are found between seven  
28 and fourteen days following the second dose(161), while those previously infected with COVID-19  
29 showed a four-fold increase in antibody binding and a 18-fold increase in neutralisation titres  
30 compared to previously uninfected individuals following two-doses(162). The BNT162b vaccine is well  
31 tolerated, with limited reactogenicity. Redness and swelling at injection site have been reported,  
32 however mild or moderate pain at the injection site is the most commonly reported reaction to  
33 vaccination(161). Fatigue, muscle pain, headache and chills are other commonly reported symptoms  
34 following BNT162b2 administration(163). The rate of systemic reactions after a second dose of  
35 BNT162b has been found to be 1.7 to 2 times higher than after a first dose, possibly suggesting an  
36 immunity-boosting effect(164). Many safety reports of this vaccine describe no serious adverse  
37 events(161, 164, 165), however, a large study found that BNT162b2 was associated with an increased  
38 risk of myocarditis, lymphadenopathy, appendicitis, and herpes zoster infection(166). Although rare,  
39 allergic reaction or anaphylaxis has also been reported following administration of the BNT162b2  
40 vaccine(163). **Table 2** outlines clinical trial and real-world data for vaccine effectiveness.  
41  
42  
43  
44  
45  
46

### 47 **6.2 Oxford-AstraZeneca – AZD1222**

48 The AZD1222 vaccine (Vaxzevria) is a non-replicating vector of the chimpanzee adenovirus  
49 ChAdOx1, modified to encode the SARS-CoV-2 S protein(167). Developed through collaboration  
50 between the University of Oxford and AstraZeneca (Cambridge, UK), this vaccine was given WHO  
51 emergency use listing on 16<sup>th</sup> February 2021(158) and has been approved for use in 137 countries, as  
52 of 24<sup>th</sup> January 2022(4). The WHO has granted emergency use listing to two versions of this vaccine  
53 (AZD1222 and Covishield) in order to utilise Covishield as part of their worldwide COVAX initiative, which  
54 is being produced by the Serum Institute of India and AstraZeneca-SKBio (Republic of Korea)(168).  
55

56 Following administration of AZD1222, significant antibody production, predominantly of IgG1  
57 and IgG3 subclasses, and a Th-1 cell response, with increased expression of IFN $\gamma$  and TNF $\alpha$ , is  
58 seen(122, 169). One dose of AZD1222 has been shown to produce a neutralising antibody response in  
59  
60

1  
2  
3 91% of participants, while a second dose resulted in 100% of participants producing neutralising  
4 antibodies(170). Mild and moderate itch, pain, redness, swelling, tenderness, and warmth are  
5 common local reactions, while chills, fatigue, fever, headache, muscle ache, and nausea are commonly  
6 reported systemic reactions following AZD1222 administration(170). Rare symptoms, including severe  
7 chest pain, nasal bleeding, and allergic reaction have been reported following AZD1222  
8 administration(171). **Table 2** outlines clinical trial and real-world data for vaccine effectiveness.  
9  
10

### 11 12 **6.3 Johnson & Johnson - Ad26.COV.2.S**

13 The Ad26.COV.2.S vaccine is a non-replicating adenovirus vector, modified to contain the  
14 SARS-CoV-2 S protein in a prefusion-stabilised conformation and requires a single dose(172). This  
15 vector was developed from the recombinant human adenovirus type 26 by the Janssen  
16 pharmaceutical company of Johnson & Johnson (New Brunswick, New Jersey, US)(172) and was listed  
17 for WHO emergency use listing on 12<sup>th</sup> March 2021(158). As of 24<sup>th</sup> January 2022, Ad26.COV.2.S has  
18 been approved for use in 106 countries(4).  
19

20 The Ad26.COV.2.S vaccine induces the production of a variety of antibody subclasses, such as  
21 IgG, IgM, and IgA, and promotes several non-neutralising antibody responses, including activation of  
22 CD4+ and CD8+ Th1-cells and production of IFN $\gamma$ , IL-2, and TNF $\alpha$ (173, 174). Although neutralising  
23 antibody responses induced by Ad26.COV.2.S are reduced against SARS-CoV-2 variants, non-  
24 neutralising antibody and T-cell responses have been found to be preserved against VOC(173), while  
25 a prior COVID-19 infection significantly increases levels of S protein-binding antibodies, antibody-  
26 dependent cellular cytotoxicity, and neutralising antibodies against VOCs including Beta and  
27 Delta(175). Ad26.COV.2.S is safe and well tolerated, with a large clinical trial demonstrating that  
28 headache, fatigue, and myalgia, are the most common systemic reactions, while injection-site pain is  
29 the most common local reaction following administration(172). Like other vaccines, Ad26.COV.2.S has  
30 been associated with serious adverse events, such as allergic reactions and cerebral venous sinus  
31 thrombosis, however, these are rare(163, 176). **Table 2** outlines clinical trial and real-world data for  
32 vaccine effectiveness.  
33  
34  
35  
36  
37  
38

### 39 **6.4 Moderna – mRNA-1273**

40 The mRNA-1273 vaccine (Spikevax) developed by Moderna (Massachusetts, US) is a lipid-  
41 nanoparticle-encapsulated mRNA vaccine expressing the SARS-CoV-2 S protein that has been  
42 prefusion-stabilised(177). This vaccine gained WHO emergency use listing on 30<sup>th</sup> April 2021(158), and  
43 as of 24<sup>th</sup> January 2022, has been approved for use in 85 countries(4).  
44

45 The mRNA-1273 vaccine elicits a strong CD4+ Th-1 cell response, with TNF $\alpha$ , IFN $\gamma$ , and IL-2  
46 expression increased following administration(178-180), while neutralising antibody titres have been  
47 shown to significantly increase up until around 28 days following the second dose of the vaccine, and  
48 afterwards remain consistently high(181). Fatigue, muscle pain, headache, chills, joint pain, and  
49 injection-site pain/reaction are common adverse effects caused by the mRNA-1273 vaccine(163, 177),  
50 while serious adverse effects are often avoided(177, 181). Serious adverse events, including allergic  
51 reaction and anaphylaxis are rare, but not inconceivable following mRNA-1273 administration(163).  
52 **Table 2** outlines clinical trial and real-world data for vaccine effectiveness.  
53  
54  
55  
56

### 57 **6.5 Other WHO emergency use listed COVID-19 vaccines**

58 In addition to the five COVID-19 vaccines described previously, five other vaccines have gained  
59 emergency use listing by the WHO. First, the Sinopharm BBIBP-CorV COVID-19 vaccine (Covilo) was  
60

1  
2  
3 developed by the Beijing Bio-Institute of Biological Products, a subsidiary of China National Biotec  
4 Group, and was given WHO emergency use listing on 7<sup>th</sup> May 2021(158). This vaccine is a 19nCoV-  
5 CDC-Tan-HB02 strain SARS-CoV-2 antigen that is produced in Vero cells, inactivated by  $\beta$ -  
6 propiolactone, and then purified and absorbed with aluminium hydroxide(182). Next, the CoronaVac  
7 vaccine, developed by Sinovac Biotech (Beijing, China), was listed for WHO emergency use on 1<sup>st</sup> June  
8 2021(158). Like the BBIBP-CorV vaccine, this vaccine is a Vero cell-based, aluminium hydroxide-  
9 adjuvanted,  $\beta$ -propiolactone-inactivated vaccine, however, it is based on the SARS-CoV-2 CZ02  
10 strain(183). Covaxin (BBV152) is a whole virion inactivated SARS-CoV-2 vaccine formula developed by  
11 Bharat Biotech International Ltd (India)(184) which gained emergency use listing from the WHO On 3<sup>rd</sup>  
12 November 2021(185). Lastly, Covovax and its originator, Nuvaxovid (NVX-CoV2372), were both  
13 developed by Novavax (Maryland, United States) and the Coalition for Epidemic Preparedness  
14 Innovations (Oslo, Norway), and gained emergency use listing on 17<sup>st</sup> and 21<sup>th</sup> December 2021,  
15 respectively(186, 187). Both vaccines are manufactured using the same technology, and consist of a  
16 recombinant SARS-CoV-2 S protein nanoparticle administered with the adjuvant Matrix-M as a co-  
17 formulation(188). These vaccines produce similar immune responses to those already discussed.  
18 Studies assessing the efficacy of these vaccines are outlined in **table 2**.  
19  
20  
21  
22  
23  
24

### 25 **6.10 Other approved vaccines**

26 In addition to the vaccines that have received emergency use listing from the WHO, around  
27 the world, vaccines have been developed, tested, and approved to combat COVID-19. As of 24<sup>th</sup>  
28 January 2022, 33 vaccines, including the ten described above, have been approved in at least one  
29 country(4). The remaining 23 approved vaccines are outlined in **table 3**.  
30  
31  
32

### 33 **6.11 Waning immunity and boosters**

34 Throughout the COVID-19 pandemic, emerging variants have threatened the effectiveness of  
35 vaccines (**table 2**). Simultaneously, waning immunity following vaccination questions how long  
36 vaccines remain effective and highlights the importance of booster doses. Indeed, protection against  
37 SARS-CoV-2 following vaccination decreases over time, both in terms of antibody titres(189-191) and  
38 vaccine effectiveness(192-195). Cellular responses, such as T-cell immunity, may persist for longer  
39 periods, however(196, 197). With a gradual loss of protection from SARS-CoV-2 following COVID-19  
40 vaccination, many countries are now rolling out booster programmes with the aim of raising levels of  
41 immunity.  
42  
43  
44

45 Since booster programmes began, evidence that a booster vaccine dose enhances antibody  
46 and cellular responses has accumulated. Following a third dose of vaccine, neutralising antibody titres  
47 increase significantly(198-201) and, in some cases, to higher levels than after the primary two  
48 doses(198). Additionally, boosters have also been found to increase neutralising antibody titres  
49 against Beta, Gamma, Delta, and Omicron variants(199, 202, 203). T-cell response is also enhanced  
50 following a third dose(200, 204, 205). Together, enhancing neutralising antibody and cellular  
51 responses with a booster vaccine dose is likely to provide a greater level of protection than relying on  
52 immunity built through a primary regimen.  
53  
54

55 The antibody and cellular responses observed following booster vaccinations have been found  
56 to correlate with increased levels of protection against SAR-CoV-2 infection and severe illness. On 30<sup>th</sup>  
57 July 2021, Israel was the first country to offer a third dose of BNT162b2 to certain groups.  
58 Subsequently, several studies have revealed that those who received a third vaccine dose were  
59 significantly less likely to be infected or have severe disease with SARS-CoV-2 compared to those who  
60



1  
2  
3 received two-doses(206-209). In those aged 60 or older, an observational study demonstrated that  
4 the rate of severe COVID-19 and death was lower in the boosted group by a factor of 17.9 and 14.7,  
5 respectively, compared to the non-boosted group(210). Booster doses of COVID-19 vaccine have been  
6 shown to be effective against infection with Delta(211, 212) and, to a lesser degree, Omicron  
7 variants(75, 145, 146, 212-214) despite the numerous mutations harboured by these variants. Overall,  
8 increasing evidence is pointing towards the benefits of booster doses of COVID-19 vaccines, therefore  
9 it is expected that booster programmes will continue to roll out across the globe. Based on current  
10 evidence, the CDC recommend that the time interval for receiving a booster following the primary  
11 regimen is five months for Pfizer/BioNTech BNT162b2 primary regimen, six months for Moderna  
12 mRNA-1273 primary regimen, and two months for Johnson & Johnson Ad26.COV2.S primary  
13 regimen(215). As the pandemic progresses and new variants emerge, variant-specific vaccines may  
14 require development, with pre-clinical studies demonstrating their efficacy(216) and pharmaceutical  
15 companies, such as Pfizer, advancing in variant-specific vaccine development(146). Policy makers  
16 should also consider when vaccine boosters will be given in the future and who will receive booster  
17 doses in the long-term.  
18  
19  
20  
21  
22  
23

## 24 **7. Emerging Treatments**

25 As more is learnt about the virus, the therapeutic strategy against COVID-19 develops. There  
26 are currently over two thousand ongoing trials assessing certain treatment strategies for COVID-  
27 19(217). Recently, antivirals including molnupiravir (Lagevrio) and nirmatrelvir/ritonavir (Paxlovid)  
28 have been approved in the UK(218, 219), US(220, 221), and Europe(222, 223) for treating COVID-19  
29 in certain risk groups. Similarly, sotrovimab (Xevudy), a monoclonal antibody treatment, has recently  
30 been approved for use in treating certain COVID-19 patients in the UK(224), US(225), and Europe(226).  
31 These drugs have been shown to be effective at preventing poor clinical outcomes, including death,  
32 in those vulnerable to severe COVID-19 infection. Other drug treatments, such as janus kinase  
33 inhibitors, corticosteroids, and anti-inflammatories have contrasting evidence to support their use,  
34 and therefore, the use of specific drugs is either recommended for or against by certain treatment  
35 and management guidelines, which are discussed below.  
36  
37  
38  
39  
40

## 41 **8. Guidelines**

42 The treatment and management of COVID-19 is a continually evolving topic, however, health  
43 authorities have published and continue to update guidelines and recommendations for treating  
44 COVID-19. The WHO living guideline on COVID-19 and therapeutics is regularly updated, with the  
45 latest version, published on 14<sup>th</sup> January 2022 containing 14 recommendations on COVID-19  
46 treatment(227). In the UK, the National Institute for Health and Care Excellence (NICE)(228) and  
47 Medicines and Healthcare products Regulatory Agency (MHRA)(229) provide updated guidelines on  
48 COVID-19 treatment, while in Europe, the ECDC regularly publishes several guidelines providing  
49 recommendations on a range of COVID-19 related topics(230). In the US, the National Institutes of  
50 Health (NIH)(231) and the CDC(232) provide guidance on COVID-19 treatment and management, with  
51 the CDC supplying guidelines for specific groups including, employers, schools, health departments,  
52 and governments.  
53  
54  
55  
56

## 57 **9. Considerations for the future**

58 Novel infectious diseases and pandemics are an unpredictable but inevitable aspect of nature  
59 and it is, therefore, important that we learn from past pandemics to prepare for future ones. Firstly,  
60

1  
2  
3 the COVID-19 pandemic has highlighted and amplified the existing inequalities within society(233),  
4 with non-white ethnicity, social disadvantage, and unemployment all risk factors for testing positive  
5 for COVID-19(234) and those most economically deprived found to be particularly vulnerable(235).  
6 These inequalities require addressing to be better prepared for similar situations in the future. Next,  
7 to progress through a pandemic we should be racing the pathogen, not each other. This statement  
8 becomes apparent when you consider the problems countries faced when seeking out PPE(236), and  
9 the vaccine inequity seen around the world(237), with developed countries often better placed to be  
10 able to purchase these items. Initiatives such as the WHO's COVAX programme are vital to protect  
11 those most vulnerable and reduce the global spread of disease. In October 2021, the UK government  
12 released a publication outlining where the policies implemented to reduce the impact of the COVID-  
13 19 pandemic failed, and the lessons learned from these failures (238). Here, it is clear that there is  
14 room for improvement, with the publication presenting conclusions and recommendations on how to  
15 enhance pandemic preparedness, lockdown and social distancing measures, testing and contact  
16 tracing, social care, and vaccines. In countries such as the UK, US, and much of Europe, where the  
17 COVID-19 death rate has been high, steps need to be taken and lessons need to be learnt in order to  
18 be better prepared for the next pandemic. The responsibility of improving pandemic response lies  
19 with policy makers, the medical/scientific community, and the public, and will ultimately require a  
20 collaborative approach.

21  
22  
23  
24  
25  
26  
27  
28  
29  
30  
31  
32  
33  
34  
35  
36  
37  
38  
39  
40  
41  
42  
43  
44  
45  
46  
47  
48  
49  
50  
51  
52  
53  
54  
55  
56  
57  
58  
59  
60  
Certain aspects of the response to the COVID-19 pandemic have been a triumph, however. One of the major victories was the rapid development and rollout of vaccines(239), which continue to be effective. The rollout of rapid testing and quarantine for positive cases was also important to at least disrupt the spread of the virus, especially given that asymptomatic individuals can contribute to the spread. Furthermore, the swift identification and sharing of knowledge of SARS-CoV-2 variants between countries should be applauded. Lessons can be learned from countries where COVID-19 was controlled. In Taiwan, managing the pandemic as directed by pre-COVID-19 pandemic plans prompted an immediate response; screening of all airline passengers arriving from Wuhan and high risk areas, restricting entry for non-Taiwanese citizens, 14-day quarantine period for contacts of confirmed cases or returning travellers, a ban on large gatherings, and widespread mask wearing were some of the quickly implemented management strategies(240). New Zealand implemented similarly effective restrictions, with the addition of a national lockdown(240). Many of the pandemic control components that kept case and death numbers low in Taiwan and New Zealand could be adopted by other countries in the future and may lead to greater outcomes in terms of protecting both health of individuals and the health and wellbeing of the country. Overall, there is much to be learnt from the COVID-19 pandemic and, as we emerge from it, inspection of which policies failed, and which succeeded are imperative.

## **10. Conclusion**

COVID-19 remains prevalent and life-threatening. Although rollout of vaccines has been successful, we must aim to address unmet goals, such as attaining a high global vaccination coverage and ensuring that all healthcare systems have the capacity to cope with seasonal waves. With Omicron highly prevalent, we must continue to learn, develop therapeutics, and remain vigilant to new VOCs. Here, we have provided an overview of the virology of SARS-CoV-2, including the mutations harboured by variants of the virus and how these mutations effect its transmissibility and virulence. Lastly, we discussed the vaccines that have been developed and administered around the world and provided

evidence supporting the rollout of booster doses. Future priorities should focus on continuing vaccination programmes and developing variant-specific vaccines as new mutations emerge. This, along with the expansion of our knowledge of SARS-CoV-2 and which therapies are most successful to treat infections with it will ultimately lead to favourable outcomes moving forward.

### **Research Questions**

- 1) How will the SARS-CoV-2 virus mutate in the future, and which mutations will give a competitive advantage that will allow the virus to inflict disease to many people?
- 2) How do we keep up with the rapidly changing SARS-CoV-2 environment and ensure that vaccines remain effective?
- 3) How do we manage the booster programme and when will future booster vaccinations be required in order to maintain high levels of immunity?
- 4) How can we learn from the current and past pandemics so that we are better prepared for the next one?

**Patient Involvement:** Patients who had been infected with covid-19 were contacted and requested to review the initial drafts of this manuscript. The received feedback was mostly positive and assisted in developing and focusing our review. Final drafts were also reviewed by patients who had had covid-19 and similar positive feedback was received.

**Contributorship statement and guarantor:** MY and HC performed the literature search and drafted the manuscript. HC revised and finalised the manuscript. JS reviewed and revised the manuscript. PE was responsible for the concept and design of the work. PE reviewed, revised, and finalised the manuscript. PE is the guarantor.

**Competing interests:** We have read and understood the BMJ policy on declaration of interests and declare the following interests: PE was funded by the Medical Research Council and now by Higher Education Funding Council for England (HEFCE). He has also received grants from Alzheimer's Research, UK, Alzheimer's Drug Discovery Foundation, Alzheimer's Society, UK, Medical Research Council, Alzheimer's Association US, Van-Geest foundation, and European Union grants. PE is a consultant to Roche, Pfizer, and Novo Nordisk. He has received educational and research grants from GE Healthcare, Novo Nordisk, Piramal Life Science/Life Molecular Imaging, Avid Radiopharmaceuticals and Eli Lilly. He is a member of the Scientific Advisory Board at Novo Nordisk. None of these were related to COVID-19

**Copyright statement:** The Corresponding Author has the right to grant on behalf of all authors and does grant on behalf of all authors, an exclusive licence (or non-exclusive for government employees) on a worldwide basis to the BMJ Publishing Group Ltd to permit this article (if accepted) to be published in BMJ editions and any other BMJPL products and sub-licenses such use and exploit all subsidiary rights, as set out in our licence ([bmj.com/advice/copyright.shtml](https://bmj.com/advice/copyright.shtml))."

### **Figure Legends:**

**Figure 1: Genome and structure of SARS-CoV-2. A) SARS-CoV-2 genome and S protein amino acid composition.** The SARS-CoV-2 genome is approximately 30,000 base pairs (bp) long and consists of open reading frames (ORF) and elements that are essential for the virus' structure. The spike S

1  
2  
3 protein is responsible for binding and entry into host cells. SARS-CoV-2 variants of concern (VOC)  
4 contain various S protein non-synonymous mutations that result in amino acid changes in the  
5 receptor binding domain (orange text) and the S1/S2 subunit interface (black text) which have been  
6 demonstrated to enhance transmissibility of the virus. VOC include Alpha ( $\alpha$ ), Beta ( $\beta$ ), Gamma ( $\gamma$ ),  
7 and Delta ( $\delta$ ). **B) SARS-CoV-2 structure.** SARS-CoV-2 is a RNA virus that has a crown-like appearance  
8 and contains four major structural proteins: nucleocapsid (N), spike (S), envelope (E), and membrane  
9 (M). **C) S and ACE2 interaction.** The SARS-CoV-2 S protein directly interacts with human angiotensin-  
10 converting enzyme 2 (ACE2) receptors in order to gain entry into host cells. The receptor binding  
11 domain (RBD) of the S protein tightly binds to ACE2. **D) Spike protein structure.** The S protein  
12 protrudes out from the main SARS-CoV-2 bulk and is comprised of two subunits: S1 and S2. S1  
13 contains the RBD which directly interacts with the human ACE2 receptor, while the S1/S2 interface  
14 contains a furin cleavage site which is cleaved to allow S2 to fuse with the host cell membrane. Both  
15 the RBD and the S1/S2 interface contain transmissibility increasing mutations that are harboured in  
16 variants of concern.  
17  
18  
19

20  
21 **Figure 2: Viral entry and host response. A) At the alveolar epithelial cell layer.** Epithelial cells in the  
22 lungs express both angiotensin-converting enzyme 2 (ACE2) receptors and transmembrane protease  
23 serine 2 (TMPRSS2), allowing for infection by SARS-CoV-2. Replication of the virus within these cells  
24 induces an intense immune response that attracts monocytes, T-cells and macrophages and, in some  
25 cases, can result in a cytokine storm. **B) Within nearby blood vessels.** Cytokines produced by the  
26 epithelial cell layer are released into blood vessels supplying the infected tissue, which causes the  
27 recruitment of further immune cells to the area, driving the damaging inflammatory response  
28 further. Circulating cytokines also create a systemic inflammatory environment. **C) Adaptive**  
29 **immune response.** Circulating lymphocytes carry viral antigens to lymph nodes and bone marrow to  
30 begin the adaptive immune system processes whereby B-cells, and later antibodies, are activated. **D)**  
31 **SARS-CoV2 host replication.** The SARS-CoV-2 virus utilises the ACE2 receptor and TMPRSS2 to gain  
32 entry into human cells. Following release of the viral RNA within the host cell, the virus utilises the  
33 host endoplasmic reticulum (ER) and Golgi apparatus to produce and manufacture new viral  
34 particles, which are released out of the cell to infect other cells and new hosts.  
35  
36  
37

38  
39 **Table 1: SARS-CoV-2 variants and their S protein mutations.** \*first detection worldwide.  
40 Information correct as of 24<sup>th</sup> January 2022.

41  
42 **Table 2: Vaccine effectiveness of vaccines that have gained WHO emergency use listing.** \*Adjusted  
43 for covariates when reported by study, dates are reported in dd/mm/yyyy format. Vaccine  
44 effectiveness days/months refers to days/months since vaccination dose. Information correct as of  
45 reported conclusion date of each study.  
46

47  
48 **Table 3: COVID-19 vaccines approved in at least one country.** Information correct as of 24<sup>th</sup>  
49 January 2022.

## 50 51 References

- 52 1. CDC.org [Internet]. Human Coronavirus Types. Centres for Disease Control and Prevention.  
53 [15 February 2020; cited 12 October 2021]. Available from:  
54 <https://www.cdc.gov/coronavirus/types.html>  
55
- 56 2. Who.int [Internet]. Weekly operational update on COVID-19 - 25 January 2022. World Health  
57 Organisation. [25 January 2022; cited 26 January 2022]. Available from:  
58 [https://www.who.int/publications/m/item/weekly-operational-update-on-covid-19---25-](https://www.who.int/publications/m/item/weekly-operational-update-on-covid-19---25-january-2022)  
59 [january-2022](https://www.who.int/publications/m/item/weekly-operational-update-on-covid-19---25-january-2022)  
60

- 1
  - 2
  - 3
  - 4
  - 5
  - 6
  - 7
  - 8
  - 9
  - 10
  - 11
  - 12
  - 13
  - 14
  - 15
  - 16
  - 17
  - 18
  - 19
  - 20
  - 21
  - 22
  - 23
  - 24
  - 25
  - 26
  - 27
  - 28
  - 29
  - 30
  - 31
  - 32
  - 33
  - 34
  - 35
  - 36
  - 37
  - 38
  - 39
  - 40
  - 41
  - 42
  - 43
  - 44
  - 45
  - 46
  - 47
  - 48
  - 49
  - 50
  - 51
  - 52
  - 53
  - 54
  - 55
  - 56
  - 57
  - 58
  - 59
  - 60
3. Who.int [Internet]. Tracking SARS-CoV-2 variants. World Health Organisation. [25 January 2022; cited 26 January 2022]. Available from: <https://www.who.int/en/activities/tracking-SARS-CoV-2-variants/>
  4. covid19.trackvaccines.org [Internet]. COVID-19 Vaccine Tracker. [24 January 2022; cited 26 January 2022]. Available from: <https://covid19.trackvaccines.org/>
  5. Chan JF, Yuan S, Kok KH, To KK, Chu H, Yang J, et al. A familial cluster of pneumonia associated with the 2019 novel coronavirus indicating person-to-person transmission: a study of a family cluster. *Lancet*. 2020;395(10223):514-23.
  6. Who.int [Internet]. Transmission of SARS-CoV-2: implications for infection prevention precautions - Scientific Brief. World Health Organisation. [9 July 2020; cited 28 October 2021]. Available from: <https://www.who.int/news-room/commentaries/detail/transmission-of-sars-cov-2-implications-for-infection-prevention-precautions>
  7. Gidari A, Sabbatini S, Bastianelli S, Pierucci S, Busti C, Bartolini D, et al. SARS-CoV-2 Survival on Surfaces and the Effect of UV-C Light. *Viruses*. 2021;13(3).
  8. Pottage T, Garratt I, Onianwa O, Spencer A, Paton S, Verlander NQ, et al. A comparison of persistence of SARS-CoV-2 variants on stainless steel. *J Hosp Infect*. 2021;114:163-6.
  9. Guo L, Wang M, Zhang L, Mao N, An C, Xu L, et al. Transmission risk of viruses in large mucosal droplets on the surface of objects: A time-based analysis. *Infect Dis Now*. 2021;51(3):219-27.
  10. Carraturo F, Del Giudice C, Morelli M, Cerullo V, Libralato G, Galdiero E, et al. Persistence of SARS-CoV-2 in the environment and COVID-19 transmission risk from environmental matrices and surfaces. *Environ Pollut*. 2020;265(Pt B):115010.
  11. Hui KP, Cheung M-C, Perera RA, Ng K-C, Bui CH, Ho JC, et al. Tropism, replication competence, and innate immune responses of the coronavirus SARS-CoV-2 in human respiratory tract and conjunctiva: an analysis in ex-vivo and in-vitro cultures. *The Lancet Respiratory Medicine*. 2020;8(7):687-95.
  12. McAloon C, Collins A, Hunt K, Barber A, Byrne AW, Butler F, et al. Incubation period of COVID-19: a rapid systematic review and meta-analysis of observational research. *BMJ Open*. 2020;10(8):e039652.
  13. Bliddal S, Banasik K, Pedersen OB, Nissen J, Cantwell L, Schwinn M, et al. Acute and persistent symptoms in non-hospitalized PCR-confirmed COVID-19 patients. *Sci Rep*. 2021;11(1):13153.
  14. Grant MC, Geoghegan L, Arbyn M, Mohammed Z, McGuinness L, Clarke EL, et al. The prevalence of symptoms in 24,410 adults infected by the novel coronavirus (SARS-CoV-2; COVID-19): A systematic review and meta-analysis of 148 studies from 9 countries. *PLoS One*. 2020;15(6):e0234765.
  15. Kronbichler A, Kresse D, Yoon S, Lee KH, Effenberger M, Shin JI. Asymptomatic patients as a source of COVID-19 infections: A systematic review and meta-analysis. *Int J Infect Dis*. 2020;98:180-6.
  16. Arons MM, Hatfield KM, Reddy SC, Kimball A, James A, Jacobs JR, et al. Presymptomatic SARS-CoV-2 Infections and Transmission in a Skilled Nursing Facility. *N Engl J Med*. 2020;382(22):2081-90.
  17. Cao Y, Wang J, Jian F, Xiao T, Song W, Yisimayi A, et al. B.1.1.529 escapes the majority of SARS-CoV-2 neutralizing antibodies of diverse epitopes. *BioRxiv [Preprint]*. 2021.
  18. Wolff D, Nee S, Hickey NS, Marschollek M. Risk factors for Covid-19 severity and fatality: a structured literature review. *Infection*. 2021;49(1):15-28.
  19. Zhou F, Yu T, Du R, Fan G, Liu Y, Liu Z, et al. Clinical course and risk factors for mortality of adult inpatients with COVID-19 in Wuhan, China: a retrospective cohort study. *Lancet*. 2020;395(10229):1054-62.

20. Zhang J, Wang X, Jia X, Li J, Hu K, Chen G, et al. Risk factors for disease severity, unimprovement, and mortality in COVID-19 patients in Wuhan, China. *Clin Microbiol Infect.* 2020;26(6):767-72.
21. Ebinger JE, Achamallah N, Ji H, Claggett BL, Sun N, Botting P, et al. Pre-existing traits associated with Covid-19 illness severity. *PLoS One.* 2020;15(7):e0236240.
22. Williamson EJ, Walker AJ, Bhaskaran K, Bacon S, Bates C, Morton CE, et al. Factors associated with COVID-19-related death using OpenSAFELY. *Nature.* 2020;584(7821):430-6.
23. Li R, Tian J, Yang F, Lv L, Yu J, Sun G, et al. Clinical characteristics of 225 patients with COVID-19 in a tertiary Hospital near Wuhan, China. *J Clin Virol.* 2020;127:104363.
24. Guo L, Shi Z, Zhang Y, Wang C, Do Vale Moreira NC, Zuo H, et al. Comorbid diabetes and the risk of disease severity or death among 8807 COVID-19 patients in China: A meta-analysis. *Diabetes Res Clin Pract.* 2020;166:108346.
25. Feng Y, Ling Y, Bai T, Xie Y, Huang J, Li J, et al. COVID-19 with Different Severities: A Multicenter Study of Clinical Features. *Am J Respir Crit Care Med.* 2020;201(11):1380-8.
26. Tian J, Yuan X, Xiao J, Zhong Q, Yang C, Liu B, et al. Clinical characteristics and risk factors associated with COVID-19 disease severity in patients with cancer in Wuhan, China: a multicentre, retrospective, cohort study. *Lancet Oncol.* 2020;21(7):893-903.
27. Liang W, Guan W, Chen R, Wang W, Li J, Xu K, et al. Cancer patients in SARS-CoV-2 infection: a nationwide analysis in China. *Lancet Oncol.* 2020;21(3):335-7.
28. Vizcarra P, Perez-Elias MJ, Quereda C, Moreno A, Vivancos MJ, Dronza F, et al. Description of COVID-19 in HIV-infected individuals: a single-centre, prospective cohort. *Lancet HIV.* 2020;7(8):e554-e64.
29. Baillie JK, Wilson JF, Bulteel N, Hayward C, Klaric L, Porteous DJ, et al. Mapping the human genetic architecture of COVID-19. *Nature.* 2021.
30. Shelton JF, Shastri AJ, Ye C, Weldon CH, Filshtein-Somnez T, Coker D, et al. Trans-ethnic analysis reveals genetic and non-genetic associations with COVID-19 susceptibility and severity. *MedRxiv [Preprint].* 2020.
31. Ellinghaus D, Degenhardt F, Bujanda L, Buti M, Albillos A, Invernizzi P, et al. Genomewide association study of severe covid-19 with respiratory failure/[...]. *New England Journal of Medicine Boston: Massachusetts Medical Society,* 2020, vol 383, no 16. 2020.
32. Hoffmann M, Kleine-Weber H, Schroeder S, Krüger N, Herrler T, Erichsen S, et al. SARS-CoV-2 cell entry depends on ACE2 and TMPRSS2 and is blocked by a clinically proven protease inhibitor. *cell.* 2020;181(2):271-80. e8.
33. Hou Y, Zhao J, Martin W, Kallianpur A, Chung MK, Jehi L, et al. New insights into genetic susceptibility of COVID-19: an ACE2 and TMPRSS2 polymorphism analysis. *BMC medicine.* 2020;18(1):1-8.
34. Barbry P, Muus C, Luecken M, Eraslan G, Waghay A, Heimberg G, et al. Integrated analyses of single-cell atlases reveal age, gender, and smoking status associations with cell type-specific expression of mediators of SARS-CoV-2 viral entry and highlights inflammatory programs in putative target cells. *BioRxiv [Preprint].* 2020.
35. Prakrithi P, Lakra P, Sundar D, Kapoor M, Mukerji M, Gupta I, et al. Genetic Risk Prediction of COVID-19 Susceptibility and Severity in the Indian Population. *Front Genet.* 2021;12:714185.
36. Huang QM, Zhang PD, Li ZH, Zhou JM, Liu D, Zhang XR, et al. Genetic Risk and Chronic Obstructive Pulmonary Disease Independently Predict the Risk of Incident Severe COVID-19. *Ann Am Thorac Soc.* 2022;19(1):58-65.
37. Zhou Y, Qian X, Liu Z, Yang H, Liu T, Chen K, et al. Coagulation factors and the incidence of COVID-19 severity: Mendelian randomization analyses and supporting evidence. *Signal Transduct Target Ther.* 2021;6(1):222.

- 1
  - 2
  - 3
  - 4
  - 5
  - 6
  - 7
  - 8
  - 9
  - 10
  - 11
  - 12
  - 13
  - 14
  - 15
  - 16
  - 17
  - 18
  - 19
  - 20
  - 21
  - 22
  - 23
  - 24
  - 25
  - 26
  - 27
  - 28
  - 29
  - 30
  - 31
  - 32
  - 33
  - 34
  - 35
  - 36
  - 37
  - 38
  - 39
  - 40
  - 41
  - 42
  - 43
  - 44
  - 45
  - 46
  - 47
  - 48
  - 49
  - 50
  - 51
  - 52
  - 53
  - 54
  - 55
  - 56
  - 57
  - 58
  - 59
  - 60
38. Payne S. Family Coronaviridae. *Viruses* 2017. p. 149-58.
39. Masters PS, Kuo L, Ye R, Hurst KR, Koetzner CA, Hsue B. Genetic and molecular biological analysis of protein-protein interactions in coronavirus assembly. *Adv Exp Med Biol.* 2006;581:163-73.
40. Khailany RA, Safdar M, Ozaslan M. Genomic characterization of a novel SARS-CoV-2. *Gene Rep.* 2020;19:100682.
41. Thoms M, Buschauer R, Ameismeier M, Koepke L, Denk T, Hirschenberger M, et al. Structural basis for translational shutdown and immune evasion by the Nsp1 protein of SARS-CoV-2. *Science.* 2020;369(6508):1249-55.
42. Schubert K, Karousis ED, Jomaa A, Scaiola A, Echeverria B, Gurzeler LA, et al. SARS-CoV-2 Nsp1 binds the ribosomal mRNA channel to inhibit translation. *Nat Struct Mol Biol.* 2020;27(10):959-66.
43. Huang C, Lokugamage KG, Rozovics JM, Narayanan K, Semler BL, Makino S. SARS coronavirus nsp1 protein induces template-dependent endonucleolytic cleavage of mRNAs: viral mRNAs are resistant to nsp1-induced RNA cleavage. *PLoS Pathog.* 2011;7(12):e1002433.
44. Snijder EJ, Decroly E, Ziebuhr J. The Nonstructural Proteins Directing Coronavirus RNA Synthesis and Processing. *Adv Virus Res.* 2016;96:59-126.
45. V'Kovski P, Gerber M, Kelly J, Pfaender S, Ebert N, Braga Lagache S, et al. Determination of host proteins composing the microenvironment of coronavirus replicase complexes by proximity-labeling. *Elife.* 2019;8.
46. Masters PS. The molecular biology of coronaviruses. *Advances in virus research.* 2006;66:193-292.
47. Siu Y, Teoh K, Lo J, Chan C, Kien F, Escriou N, et al. The M, E, and N structural proteins of the severe acute respiratory syndrome coronavirus are required for efficient assembly, trafficking, and release of virus-like particles. *Journal of virology.* 2008;82(22):11318-30.
48. Kuo L, Masters PS. Genetic evidence for a structural interaction between the carboxy termini of the membrane and nucleocapsid proteins of mouse hepatitis virus. *J Virol.* 2002;76(10):4987-99.
49. Hulswit RJ, de Haan CA, Bosch BJ. Coronavirus Spike Protein and Tropism Changes. *Adv Virus Res.* 2016;96:29-57.
50. Konno Y, Kimura I, Uriu K, Fukushi M, Irie T, Koyanagi Y, et al. SARS-CoV-2 ORF3b Is a Potent Interferon Antagonist Whose Activity Is Increased by a Naturally Occurring Elongation Variant. *Cell Rep.* 2020;32(12):108185.
51. Kopecky-Bromberg SA, Martinez-Sobrido L, Frieman M, Baric RA, Palese P. Severe acute respiratory syndrome coronavirus open reading frame (ORF) 3b, ORF 6, and nucleocapsid proteins function as interferon antagonists. *J Virol.* 2007;81(2):548-57.
52. Xia H, Cao Z, Xie X, Zhang X, Chen JY, Wang H, et al. Evasion of Type I Interferon by SARS-CoV-2. *Cell Rep.* 2020;33(1):108234.
53. Wong HH, Fung TS, Fang S, Huang M, Le MT, Liu DX. Accessory proteins 8b and 8ab of severe acute respiratory syndrome coronavirus suppress the interferon signaling pathway by mediating ubiquitin-dependent rapid degradation of interferon regulatory factor 3. *Virology.* 2018;515:165-75.
54. Azad GK, Khan PK. Variations in Orf3a protein of SARS-CoV-2 alter its structure and function. *Biochem Biophys Rep.* 2021;26:100933.
55. Ren Y, Shu T, Wu D, Mu J, Wang C, Huang M, et al. The ORF3a protein of SARS-CoV-2 induces apoptosis in cells. *Cell Mol Immunol.* 2020;17(8):881-3.
56. Kreimendahl S, Rassow J. The Mitochondrial Outer Membrane Protein Tom70-Mediator in Protein Traffic, Membrane Contact Sites and Innate Immunity. *Int J Mol Sci.* 2020;21(19).

- 1
  - 2
  - 3
  - 4
  - 5
  - 6
  - 7
  - 8
  - 9
  - 10
  - 11
  - 12
  - 13
  - 14
  - 15
  - 16
  - 17
  - 18
  - 19
  - 20
  - 21
  - 22
  - 23
  - 24
  - 25
  - 26
  - 27
  - 28
  - 29
  - 30
  - 31
  - 32
  - 33
  - 34
  - 35
  - 36
  - 37
  - 38
  - 39
  - 40
  - 41
  - 42
  - 43
  - 44
  - 45
  - 46
  - 47
  - 48
  - 49
  - 50
  - 51
  - 52
  - 53
  - 54
  - 55
  - 56
  - 57
  - 58
  - 59
  - 60
57. Gordon DE, Jang GM, Bouhaddou M, Xu J, Obernier K, White KM, et al. A SARS-CoV-2 protein interaction map reveals targets for drug repurposing. *Nature*. 2020;583(7816):459-68.
58. Dominguez Andres A, Feng Y, Campos AR, Yin J, Yang CC, James B, et al. SARS-CoV-2 ORF9c Is a Membrane-Associated Protein that Suppresses Antiviral Responses in Cells. *BioRxiv* [Preprint]. 2020.
59. Redondo N, Zaldivar-Lopez S, Garrido JJ, Montoya M. SARS-CoV-2 Accessory Proteins in Viral Pathogenesis: Knowns and Unknowns. *Front Immunol*. 2021;12:708264.
60. Bosch BJ, van der Zee R, de Haan CA, Rottier PJ. The coronavirus spike protein is a class I virus fusion protein: structural and functional characterization of the fusion core complex. *J Virol*. 2003;77(16):8801-11.
61. Li F. Structure, Function, and Evolution of Coronavirus Spike Proteins. *Annu Rev Virol*. 2016;3(1):237-61.
62. Wrapp D, Wang N, Corbett KS, Goldsmith JA, Hsieh CL, Abiona O, et al. Cryo-EM structure of the 2019-nCoV spike in the prefusion conformation. *Science*. 2020;367(6483):1260-3.
63. Walls AC, Park YJ, Tortorici MA, Wall A, McGuire AT, Veesler D. Structure, Function, and Antigenicity of the SARS-CoV-2 Spike Glycoprotein. *Cell*. 2020;181(2):281-92 e6.
64. Khare S, Azevedo M, Parajuli P, Gokulan K. Conformational Changes of the Receptor Binding Domain of SARS-CoV-2 Spike Protein and Prediction of a B-Cell Antigenic Epitope Using Structural Data. *Front Artif Intell*. 2021;4:630955.
65. Lan J, Ge J, Yu J, Shan S, Zhou H, Fan S, et al. Structure of the SARS-CoV-2 spike receptor-binding domain bound to the ACE2 receptor. *Nature*. 2020;581(7807):215-20.
66. Millet JK, Whittaker GR. Host cell proteases: Critical determinants of coronavirus tropism and pathogenesis. *Virus Res*. 2015;202:120-34.
67. Hamming I, Timens W, Bulthuis ML, Lely AT, Navis G, van Goor H. Tissue distribution of ACE2 protein, the functional receptor for SARS coronavirus. A first step in understanding SARS pathogenesis. *J Pathol*. 2004;203(2):631-7.
68. Glowacka I, Bertram S, Muller MA, Allen P, Soilleux E, Pfefferle S, et al. Evidence that TMPRSS2 activates the severe acute respiratory syndrome coronavirus spike protein for membrane fusion and reduces viral control by the humoral immune response. *J Virol*. 2011;85(9):4122-34.
69. Zhao MM, Yang WL, Yang FY, Zhang L, Huang WJ, Hou W, et al. Cathepsin L plays a key role in SARS-CoV-2 infection in humans and humanized mice and is a promising target for new drug development. *Signal Transduct Target Ther*. 2021;6(1):134.
70. Hoffmann M, Kleine-Weber H, Schroeder S, Kruger N, Herrler T, Erichsen S, et al. SARS-CoV-2 Cell Entry Depends on ACE2 and TMPRSS2 and Is Blocked by a Clinically Proven Protease Inhibitor. *Cell*. 2020;181(2):271-80 e8.
71. Duchene S, Featherstone L, Haritopoulou-Sinanidou M, Rambaut A, Lemey P, Baele G. Temporal signal and the phylodynamic threshold of SARS-CoV-2. *Virus Evol*. 2020;6(2):veaa061.
72. Ecdc.europa.eu [Internet]. Methods for the detection and characterisation of SARS-CoV-2 variants - first update. European Centre for Disease Prevention and Control. [20 December 2021; cited 7 January 2022]. Available from: <https://www.ecdc.europa.eu/en/publications-data/methods-detection-and-characterisation-sars-cov-2-variants-first-update>
73. Cdc.gov [Internet]. COVID-19: About Variants. Centers for Disease Control and Prevention. [13 December 2021; cited 7 January 2022]. Available from: <https://www.cdc.gov/coronavirus/2019-ncov/variants/about-variants.html>
74. Imperial.ac.uk [Internet]. Report 50 - Hospitalisation risk for Omicron cases in England. Imperial College London, MRC Centre for Global Infectious Disease Analysis. [22 December



- 2021; cited 10 January 2022]. Available from: <https://www.imperial.ac.uk/mrc-global-infectious-disease-analysis/covid-19/report-50-severity-omicron/>
75. Gov.uk [Internet]. SARS-CoV-2 variants of concern and variants under investigation in England - Technical briefing 33. UK Health Security Agency. [23 December 2021; cited 10 January 2022]. Available from: [https://assets.publishing.service.gov.uk/government/uploads/system/uploads/attachment\\_data/file/1043807/technical-briefing-33.pdf](https://assets.publishing.service.gov.uk/government/uploads/system/uploads/attachment_data/file/1043807/technical-briefing-33.pdf)
76. Luna-Muschi A, Borges IC, de Faria E, Barboza AS, Maia FL, Leme MD, et al. Clinical features of COVID-19 by SARS-CoV-2 Gamma variant: A prospective cohort study of vaccinated and unvaccinated healthcare workers. *J Infect*. 2021.
77. Gov.uk [Internet]. Investigation of novel SARS-CoV-2 variant - Variant of Concern 202012/01 - Technical briefing 5. UK Health Security Agency (formerly Public Health England). [14 January 2021; cited 10 January 2022]. Available from: [https://assets.publishing.service.gov.uk/government/uploads/system/uploads/attachment\\_data/file/959426/Variant\\_of\\_Concern\\_VOC\\_202012\\_01\\_Technical\\_Briefing\\_5.pdf](https://assets.publishing.service.gov.uk/government/uploads/system/uploads/attachment_data/file/959426/Variant_of_Concern_VOC_202012_01_Technical_Briefing_5.pdf)
78. Wang Y, Liu M, Gao J. Enhanced receptor binding of SARS-CoV-2 through networks of hydrogen-bonding and hydrophobic interactions. *Proc Natl Acad Sci U S A*. 2020;117(25):13967-74.
79. Yi C, Sun X, Ye J, Ding L, Liu M, Yang Z, et al. Key residues of the receptor binding motif in the spike protein of SARS-CoV-2 that interact with ACE2 and neutralizing antibodies. *Cell Mol Immunol*. 2020;17(6):621-30.
80. Starr TN, Greaney AJ, Hilton SK, Ellis D, Crawford KHD, Dingens AS, et al. Deep Mutational Scanning of SARS-CoV-2 Receptor Binding Domain Reveals Constraints on Folding and ACE2 Binding. *Cell*. 2020;182(5):1295-310 e20.
81. Huang Y, Yang C, Xu XF, Xu W, Liu SW. Structural and functional properties of SARS-CoV-2 spike protein: potential antiviral drug development for COVID-19. *Acta Pharmacol Sin*. 2020;41(9):1141-9.
82. Hoffmann M, Kleine-Weber H, Pohlmann S. A Multibasic Cleavage Site in the Spike Protein of SARS-CoV-2 Is Essential for Infection of Human Lung Cells. *Mol Cell*. 2020;78(4):779-84 e5.
83. Peacock TP, Goldhill DH, Zhou J, Baillon L, Frise R, Swann OC, et al. The furin cleavage site of SARS-CoV-2 spike protein is a key determinant for transmission due to enhanced replication in airway cells. *BioRxiv [Preprint]*. 2020.
84. Zhu Y, Feng F, Hu G, Wang Y, Yu Y, Zhu Y, et al. The S1/S2 boundary of SARS-CoV-2 spike protein modulates cell entry pathways and transmission. *BioRxiv [Preprint]*. 2020.
85. Scudellari M. How the coronavirus infects cells - and why Delta is so dangerous. *Nature*. 2021;595(7869):640-4.
86. Wang Q, Qiu Y, Li JY, Zhou ZJ, Liao CH, Ge XY. A Unique Protease Cleavage Site Predicted in the Spike Protein of the Novel Pneumonia Coronavirus (2019-nCoV) Potentially Related to Viral Transmissibility. *Virol Sin*. 2020;35(3):337-9.
87. Yurkovetskiy L, Wang X, Pascal KE, Tomkins-Tinch C, Nyalile TP, Wang Y, et al. Structural and Functional Analysis of the D614G SARS-CoV-2 Spike Protein Variant. *Cell*. 2020;183(3):739-51 e8.
88. McCarthy KR, Rennick LJ, Nambulli S, Robinson-McCarthy LR, Bain WG, Haidar G, et al. Natural deletions in the SARS-CoV-2 spike glycoprotein drive antibody escape. *BioRxiv [Preprint]*. 2021.
89. Kemp SA, Collier DA, Datir R, Ferreira I, Gayed S, Jahun A, et al. Neutralising antibodies in Spike mediated SARS-CoV-2 adaptation. *MedRxiv [Preprint]*. 2020.

- 1
  - 2
  - 3
  - 4
  - 5
  - 6
  - 7
  - 8
  - 9
  - 10
  - 11
  - 12
  - 13
  - 14
  - 15
  - 16
  - 17
  - 18
  - 19
  - 20
  - 21
  - 22
  - 23
  - 24
  - 25
  - 26
  - 27
  - 28
  - 29
  - 30
  - 31
  - 32
  - 33
  - 34
  - 35
  - 36
  - 37
  - 38
  - 39
  - 40
  - 41
  - 42
  - 43
  - 44
  - 45
  - 46
  - 47
  - 48
  - 49
  - 50
  - 51
  - 52
  - 53
  - 54
  - 55
  - 56
  - 57
  - 58
  - 59
  - 60
90. Gamage AM, Tan KS, Chan WOY, Liu J, Tan CW, Ong YK, et al. Infection of human Nasal Epithelial Cells with SARS-CoV-2 and a 382-nt deletion isolate lacking ORF8 reveals similar viral kinetics and host transcriptional profiles. *PLoS Pathog.* 2020;16(12):e1009130.
91. Collier DA, De Marco A, Ferreira I, Meng B, Datir RP, Walls AC, et al. Sensitivity of SARS-CoV-2 B.1.1.7 to mRNA vaccine-elicited antibodies. *Nature.* 2021;593(7857):136-41.
92. Martínez-García L, Espinel MA, Abreu M, González-Alba JM, Gijón D, McGee A, et al. Emergence and Spread of B. 1.1. 7 Lineage in Primary Care and Clinical Impact in the Morbi-Mortality among Hospitalized Patients in Madrid, Spain. *Microorganisms.* 2021;9(7):1517.
93. Vassallo M, Manni S, Klotz C, Fabre R, Pini P, Blanchouin E, et al. Patients Admitted for Variant Alpha COVID-19 Have Poorer Outcomes than Those Infected with the Old Strain. *J Clin Med.* 2021;10(16).
94. McAlister FA, Nabipour M, Chu A, Lee DS, Saxinger L, Bakal JA. Lessons from the COVID-19 third wave in Canada: the impact of variants of concern and shifting demographics. *MedRxiv [Preprint].* 2021.
95. Davies NG, Abbott S, Barnard RC, Jarvis CI, Kucharski AJ, Munday JD, et al. Estimated transmissibility and impact of SARS-CoV-2 lineage B.1.1.7 in England. *Science.* 2021;372(6538).
96. Leung K, Shum MH, Leung GM, Lam TT, Wu JT. Early transmissibility assessment of the N501Y mutant strains of SARS-CoV-2 in the United Kingdom, October to November 2020. *Euro Surveill.* 2021;26(1).
97. Zhao S, Lou J, Cao L, Zheng H, Chong MKC, Chen Z, et al. Quantifying the transmission advantage associated with N501Y substitution of SARS-CoV-2 in the UK: an early data-driven analysis. *J Travel Med.* 2021;28(2).
98. Gov.uk [Internet]. NERVTAG paper on COVID-19 variant of concern B.1.1.7. NERVTAG - COVID-19 Public statements. [22 January 2021; cited 7 October 2021] Available from: [https://assets.publishing.service.gov.uk/government/uploads/system/uploads/attachment\\_data/file/961037/NERVTAG\\_note\\_on\\_B.1.1.7\\_severity\\_for\\_SAGE\\_77\\_\\_1\\_.pdf](https://assets.publishing.service.gov.uk/government/uploads/system/uploads/attachment_data/file/961037/NERVTAG_note_on_B.1.1.7_severity_for_SAGE_77__1_.pdf)
99. Challen R, Brooks-Pollock E, Read JM, Dyson L, Tsaneva-Atanasova K, Danon L. Risk of mortality in patients infected with SARS-CoV-2 variant of concern 202012/1: matched cohort study. *BMJ.* 2021;372:n579.
100. Paredes MI, Lunn SM, Famulare M, Frisbie LA, Painter I, Burstein R, et al. Associations between SARS-CoV-2 variants and risk of COVID-19 hospitalization among confirmed cases in Washington State: a retrospective cohort study. *MedRxiv [Preprint].* 2021.
101. Wang P, Nair MS, Liu L, Iketani S, Luo Y, Guo Y, et al. Antibody Resistance of SARS-CoV-2 Variants B.1.351 and B.1.1.7. *BioRxiv [Preprint].* 2021:2021.01.25.428137.
102. Wu K, Werner AP, Moliva JI, Koch M, Choi A, Stewart-Jones GBE, et al. mRNA-1273 vaccine induces neutralizing antibodies against spike mutants from global SARS-CoV-2 variants. *BioRxiv [Preprint].* 2021.
103. Gallais F, Gantner P, Bruel T, Velay A, Planas D, Wendling M-J, et al. Anti-SARS-CoV-2 Antibodies Persist for up to 13 Months and Reduce Risk of Reinfection. *MedRxiv [Preprint].* 2021.
104. Ecdc.europa.eu [Internet]. SARS-CoV-2 variants of concern as of 20 January 2022. European Centre for Disease Prevention and Control. [20 January 2022; cited 24 January 2022] Available from: <https://www.ecdc.europa.eu/en/covid-19/variants-concern>
105. Gu H, Chen Q, Yang G, He L, Fan H, Deng YQ, et al. Adaptation of SARS-CoV-2 in BALB/c mice for testing vaccine efficacy. *Science.* 2020;369(6511):1603-7.
106. Plante JA, Liu Y, Liu J, Xia H, Johnson BA, Lokugamage KG, et al. Spike mutation D614G alters SARS-CoV-2 fitness. *Nature.* 2021;592(7852):116-21.

- 1  
2  
3  
4  
5  
6  
7  
8  
9  
10  
11  
12  
13  
14  
15  
16  
17  
18  
19  
20  
21  
22  
23  
24  
25  
26  
27  
28  
29  
30  
31  
32  
33  
34  
35  
36  
37  
38  
39  
40  
41  
42  
43  
44  
45  
46  
47  
48  
49  
50  
51  
52  
53  
54  
55  
56  
57  
58  
59  
60
107. Pearson CA, Russell TW, Davies NG, Kucharski AJ, group CC-w, Edmunds WJ, et al. Estimates of severity and transmissibility of novel South Africa SARS-CoV-2 variant 501Y.V2. Centre for Mathematical Modelling of Infectious Diseases. CMMID Repository [Preprint]. 2021.
  108. Wibmer CK, Ayres F, Hermanus T, Madzivhandila M, Kgagudi P, Oosthuysen B, et al. SARS-CoV-2 501Y.V2 escapes neutralization by South African COVID-19 donor plasma. *Nat Med.* 2021;27(4):622-5.
  109. Sinha S, Tam B, Wang SM. Altered interaction between RBD and ACE2 receptor contributes towards the increased transmissibility of SARS CoV-2 delta, kappa, beta, and gamma strains with RBD double mutations. *BioRxiv* [Preprint]. 2021.
  110. Campbell F, Archer B, Laurenson-Schafer H, Jinnai Y, Konings F, Batra N, et al. Increased transmissibility and global spread of SARS-CoV-2 variants of concern as at June 2021. *Euro Surveill.* 2021;26(24).
  111. [Ecdc.europa.eu](https://www.ecdc.europa.eu/en/publications-data/covid-19-risk-assessment-variants-vaccine-fourteenth-update-february-2021) [Internet]. Risk assessment: SARS-CoV-2 - increased circulation of variants of concern and vaccine rollout in the EU/EEA, 14th update. European Centre for Disease Prevention and Control. [15 February 2021; cited 8 October 2021] Available from: <https://www.ecdc.europa.eu/en/publications-data/covid-19-risk-assessment-variants-vaccine-fourteenth-update-february-2021>
  112. Khan A, Zia T, Suleman M, Khan T, Ali SS, Abbasi AA, et al. Higher infectivity of the SARS-CoV-2 new variants is associated with K417N/T, E484K, and N501Y mutants: An insight from structural data. *J Cell Physiol.* 2021;236(10):7045-57.
  113. Baum A, Fulton BO, Wloga E, Copin R, Pascal KE, Russo V, et al. Antibody cocktail to SARS-CoV-2 spike protein prevents rapid mutational escape seen with individual antibodies. *Science.* 2020;369(6506):1014-8.
  114. Curran J, Dol J, Boulos L, Somerville M, McCulloch H, MacDonald M, et al. Transmission characteristics of SARS-CoV-2 variants of concern. *MedRxiv* [Preprint]. 2021.
  115. de Faria E, Guedes AR, Oliveira MS, de Godoy Moreira MV, Maia FL, dos Santos Barboza A, et al. Performance of vaccination with CoronaVac in a cohort of healthcare workers (HCW) - preliminary report. *MedRxiv* [Preprint]. 2021.
  116. Freitas ARR, Beckedorff OA, Cavalcanti LPG, Siqueira AM, Castro DB, Costa CFD, et al. The emergence of novel SARS-CoV-2 variant P.1 in Amazonas (Brazil) was temporally associated with a change in the age and sex profile of COVID-19 mortality: A population based ecological study. *Lancet Reg Health Am.* 2021;1:100021.
  117. Funk T, Pharris A, Spiteri G, Bundle N, Melidou A, Carr M, et al. Characteristics of SARS-CoV-2 variants of concern B.1.1.7, B.1.351 or P.1: data from seven EU/EEA countries, weeks 38/2020 to 10/2021. *Euro Surveill.* 2021;26(16).
  118. Sabino EC, Buss LF, Carvalho MPS, Prete CA, Jr., Crispim MAE, Fraiji NA, et al. Resurgence of COVID-19 in Manaus, Brazil, despite high seroprevalence. *Lancet.* 2021;397(10273):452-5.
  119. Dejnirattisai W, Zhou D, Supasa P, Liu C, Mentzer AJ, Ginn HM, et al. Antibody evasion by the P.1 strain of SARS-CoV-2. *Cell.* 2021;184(11):2939-54 e9.
  120. Korber B, Fischer WM, Gnanakaran S, Yoon H, Theiler J, Abfalterer W, et al. Tracking Changes in SARS-CoV-2 Spike: Evidence that D614G Increases Infectivity of the COVID-19 Virus. *Cell.* 2020;182(4):812-27 e19.
  121. Volz E, Hill V, McCrone JT, Price A, Jorgensen D, O'Toole A, et al. Evaluating the Effects of SARS-CoV-2 Spike Mutation D614G on Transmissibility and Pathogenicity. *Cell.* 2021;184(1):64-75 e11.

122. Augusto G, Mohsen MO, Zinkhan S, Liu X, Vogel M, Bachmann MF. In vitro data suggest that Indian delta variant B.1.617 of SARS-CoV-2 escapes neutralization by both receptor affinity and immune evasion. *Allergy*. 2021.
123. Tchesnokova V, Kulakesara H, Larson L, Bowers V, Rechkina E, Kisiela D, et al. Acquisition of the L452R mutation in the ACE2-binding interface of Spike protein triggers recent massive expansion of SARS-Cov-2 variants. *BioRxiv [Preprint]*. 2021.
124. Li Q, Wu J, Nie J, Zhang L, Hao H, Liu S, et al. The Impact of Mutations in SARS-CoV-2 Spike on Viral Infectivity and Antigenicity. *Cell*. 2020;182(5):1284-94 e9.
125. Di Giacomo S, Mercatelli D, Rakhimov A, Giorgi FM. Preliminary report on severe acute respiratory syndrome coronavirus 2 (SARS-CoV-2) Spike mutation T478K. *J Med Virol*. 2021;93(9):5638-43.
126. Torjesen I. Covid-19: Delta variant is now UK's most dominant strain and spreading through schools. *BMJ*. 2021;373:n1445.
127. Reuters.com [Internet]. Delta COVID variant now dominant strain worldwide, U.S. deaths surge -officials. O'donnell C, Mason J, Reuters. [16 July 2021; cited 6 January 2022]. Available from: [www.reuters.com](http://www.reuters.com)
128. Euro.who.int [Internet]. SARS-CoV-2 Delta variant now dominant in much of European region; efforts must be reinforced to prevent transmission, warns WHO Regional Office for Europe and ECDC. World Health Organisation. [23 July 2021; cited 11 October 2021]. Available from: <https://www.euro.who.int/en/media-centre/sections/press-releases/2021/sars-cov-2-delta-variant-now-dominant-in-much-of-european-region-efforts-must-be-reinforced-to-prevent-transmission,-warns-who-regional-office-for-europe-and-ecdc>
129. Li B, Deng A, Li K, Hu Y, Li Z, Xiong Q, et al. Viral infection and transmission in a large, well-traced outbreak caused by the SARS-CoV-2 Delta variant *MedRxiv [Preprint]*. 2021.
130. Teyssou E, Delagreverie H, Visseaux B, Lambert-Niclot S, Briclher S, Ferre V, et al. The Delta SARS-CoV-2 variant has a higher viral load than the Beta and the historical variants in nasopharyngeal samples from newly diagnosed COVID-19 patients. *J Infect*. 2021;83(4):e1-e3.
131. Kumar A, Asghar A, Raza K, Narayan RK, Jha RK, Satyam A, et al. Demographic characteristics of SARS-CoV-2 B.1.617.2 (Delta) variant infections in Indian population. *MedRxiv [Preprint]*. 2021.
132. Planas D, Veyer D, Baidaliuk A, Staropoli I, Guivel-Benhassine F, Rajah MM, et al. Reduced sensitivity of SARS-CoV-2 variant Delta to antibody neutralization. *Nature*. 2021;596(7871):276-80.
133. Sheikh A, McMenamain J, Taylor B, Robertson C, Public Health S, the EIIC. SARS-CoV-2 Delta VOC in Scotland: demographics, risk of hospital admission, and vaccine effectiveness. *Lancet*. 2021;397(10293):2461-2.
134. Fisman DN, Tuite AR. Progressive Increase in Virulence of Novel SARS-CoV-2 Variants in Ontario, Canada. *MedRxiv [Preprint]*. 2021.
135. Cameroni E, Saliba C, Bowen JE, Rosen LE, Culap K, Pinto D, et al. Broadly neutralizing antibodies overcome SARS-CoV-2 Omicron antigenic shift. *BioRxiv [Preprint]*. 2021.
136. Shah M, Woo HG. Omicron: A heavily mutated SARS-CoV-2 variant exhibits stronger binding to ACE2 and potently escape approved COVID-19 therapeutic antibodies. *BioRxiv [Preprint]*. 2021.
137. Wolter N, Jassat W, Walaza S, Welch R, Moultrie H, Groome M, et al. Early assessment of the clinical severity of the SARS-CoV-2 Omicron variant in South Africa. *MedRxiv [Preprint]*. 2021.
138. Gov.uk [Internet]. Omicron daily overview: 24 December 2021. UK Health Security Agency. [24 December 2021; cited 4 January 2022]. Available from:

- [https://assets.publishing.service.gov.uk/government/uploads/system/uploads/attachment\\_data/file/1043866/20211224\\_OS\\_Daily\\_Omicron\\_Overview.pdf](https://assets.publishing.service.gov.uk/government/uploads/system/uploads/attachment_data/file/1043866/20211224_OS_Daily_Omicron_Overview.pdf)
139. Who.int [Internet]. Enhancing readiness for Omicron (B.1.1.529): Technical brief and priority actions for Member States. World Health Organisation. [23 December 2021; cited 4 January 2022]. Available from: [https://www.who.int/docs/default-source/coronaviruse/2021-12-23-global-technical-brief-and-priority-action-on-omicron.pdf?sfvrsn=d0e9fb6c\\_8](https://www.who.int/docs/default-source/coronaviruse/2021-12-23-global-technical-brief-and-priority-action-on-omicron.pdf?sfvrsn=d0e9fb6c_8)
  140. Med.hku.hk [Internet]. HKUMed finds Omicron SARS-CoV-2 can infect faster and better than Delta in human bronchus but with less severe infection in lung. The University of Hong Kong, LKS Faculty of Medicine. [15 December 2021; cited 5 January 2022]. Available from: <https://www.med.hku.hk/en/news/press/20211215-omicron-sars-cov-2-infection>
  141. Sheikh A, Kerr S, Woolhouse M, McMenamin J, C. R. Severity of Omicron variant of concern and vaccine effectiveness against symptomatic disease: national cohort with nested test negative design study in Scotland. 2021.
  142. Pulliam JRC, van Schalkwyk C, Govender N, von Gottberg A, Cohen C, Groome MJ, et al. Increased risk of SARS-CoV-2 reinfection associated with emergence of the Omicron variant in South Africa. MedRxiv [Preprint]. 2021.
  143. Sandile Cele, Laurelle Jackson, Khadija Khan, David Khoury, Thandeka Moyo-Gwete, Houriiyah Tegally, et al. SARS-CoV-2 Omicron has extensive but incomplete escape of Pfizer BNT162b2 elicited neutralization and requires ACE2 for infection. MedRxiv [Preprint]. 2021.
  144. Planas D, Saunders N, Maes P, Guivel-Benhassine F, Planchais C, Buchrieser J, et al. Considerable escape of SARS-CoV-2 variant Omicron to antibody neutralization. BioRxiv [Preprint]. 2021.
  145. Meng B, Ferreira IATM, Abdullahi A, Saito A, Kimura I, Yamasoba D, et al. SARS-CoV-2 Omicron spike mediated immune escape, infectivity and cell-cell fusion. BioRxiv [Preprint]. 2021.
  146. Pfizer.com [Internet]. Pfizer and BioNTech Provide Update on Omicron Variant. Pfizer. [8 December 2021; cited 4 January 2022]. Available from: <https://www.pfizer.com/news/press-release/press-release-detail/pfizer-and-biontech-provide-update-omicron-variant>
  147. Keeton R, Tincho MB, Ngomti A, Baguma R, Benede N, Suzuki A, et al. SARS-CoV-2 spike T cell responses induced upon vaccination or infection remain robust against Omicron. MedRxiv [Preprint]. 2021.
  148. Sacoronavirus.co.za [Internet]. Cabinet approves changes to covid-19 regulations. South Africa Department of Health. [30 December 2021; cited 7 January 2022]. Available from: <https://sacoronavirus.co.za/2021/12/30/media-release-cabinet-approves-changes-to-covid-19-regulations/>
  149. Taylor L. Covid-19: Omicron drives weekly record high in global infections. BMJ. 2022;376:o66.
  150. Tada T, Zhou H, Dcosta BM, Samanovic MI, Mulligan MJ, Landau NR. SARS-CoV-2 Lambda Variant Remains Susceptible to Neutralization by mRNA Vaccine-elicited Antibodies and Convalescent Serum. BioRxiv [Preprint]. 2021.
  151. Acevedo ML, Alonso-Palomares L, Bustamante A, Gaggero A, Paredes F, Cortés CP, et al. Infectivity and immune escape of the new SARS-CoV-2 variant of interest Lambda. MedRxiv [Preprint]. 2021.
  152. Laiton-Donato K, Franco-Munoz C, Alvarez-Diaz DA, Ruiz-Moreno HA, Usme-Ciro JA, Prada DA, et al. Characterization of the emerging B.1.621 variant of interest of SARS-CoV-2. Infect Genet Evol. 2021;95:105038.

153. Chen J, Gao K, Wang R, Wei GW. Revealing the Threat of Emerging SARS-CoV-2 Mutations to Antibody Therapies. *J Mol Biol.* 2021;433(18):167155.
154. Amanat F, Krammer F. SARS-CoV-2 vaccines: status report. *Immunity.* 2020;52(4):583-9.
155. [dataset] Who.int. COVID-19 vaccine tracker and landscape. World Health Organisation. [25 January 2022; cited 26 January 2022]. Available from: <https://www.who.int/publications/m/item/draft-landscape-of-covid-19-candidate-vaccines>
156. Polack FP, Thomas SJ, Kitchin N, Absalon J, Gurtman A, Lockhart S, et al. Safety and Efficacy of the BNT162b2 mRNA Covid-19 Vaccine. *N Engl J Med.* 2020;383(27):2603-15.
157. Wrapp D, Wang N, Corbett KS, Goldsmith JA, Hsieh C-L, Abiona O, et al. Cryo-EM structure of the 2019-nCoV spike in the prefusion conformation. *Science.* 2020;367(6483):1260-3.
158. Who.int [Internet]. Coronavirus disease (COVID-19): Vaccines. World Health Organisation. [20 January 2022; cited 26 January 2022]. Available from: [https://www.who.int/news-room/questions-and-answers/item/coronavirus-disease-\(covid-19\)-vaccines](https://www.who.int/news-room/questions-and-answers/item/coronavirus-disease-(covid-19)-vaccines)
159. Sahin U, Muik A, Vogler I, Derhovanessian E, Kranz LM, Vormehr M, et al. BNT162b2 vaccine induces neutralizing antibodies and poly-specific T cells in humans. *Nature.* 2021;595(7868):572-7.
160. Arunachalam PS, Scott MKD, Hagan T, Li C, Feng Y, Wimmers F, et al. Systems vaccinology of the BNT162b2 mRNA vaccine in humans. *Nature.* 2021;596(7872):410-6.
161. Walsh EE, Frenck RW, Jr., Falsey AR, Kitchin N, Absalon J, Gurtman A, et al. Safety and Immunogenicity of Two RNA-Based Covid-19 Vaccine Candidates. *N Engl J Med.* 2020;383(25):2439-50.
162. Appelman B, van der Straten K, Lavell AHA, Schinkel M, Slim MA, Poniman M, et al. Time since SARS-CoV-2 infection and humoral immune response following BNT162b2 mRNA vaccination. *EBioMedicine.* 2021;72:103589.
163. Beatty AL, Peyser ND, Butcher XE, Cocohoba JM, Lin F, Olgin JE, et al. Analysis of COVID-19 Vaccine Type and Adverse Effects Following Vaccination. *JAMA Netw Open.* 2021;4(12):e2140364.
164. Vizcarra P, Haemmerle J, Velasco H, Velasco T, Fernandez-Escribano M, Vallejo A, et al. BNT162b2 mRNA COVID-19 vaccine Reactogenicity: The key role of immunity. *Vaccine.* 2021;39(51):7367-74.
165. Salmeron Rios S, Mas Romero M, Cortes Zamora EB, Tabernero Sahuquillo MT, Romero Rizos L, Sanchez-Jurado PM, et al. Immunogenicity of the BNT162b2 vaccine in frail or disabled nursing home residents: COVID-A study. *J Am Geriatr Soc.* 2021;69(6):1441-7.
166. Barda N, Dagan N, Ben-Shlomo Y, Kepten E, Waxman J, Ohana R, et al. Safety of the BNT162b2 mRNA Covid-19 Vaccine in a Nationwide Setting. *N Engl J Med.* 2021;385(12):1078-90.
167. Sharma O, Sultan AA, Ding H, Trigg CR. A Review of the Progress and Challenges of Developing a Vaccine for COVID-19. *Front Immunol.* 2020;11:585354.
168. Who.int [Internet]. WHO lists two additional COVID-19 vaccines for emergency use and COVAX roll-out. World Health Organisation. [15 February 2021; cited 13 October 2021]. Available from: <https://www.who.int/news/item/15-02-2021-who-lists-two-additional-covid-19-vaccines-for-emergency-use-and-covax-roll-out>
169. Ewer KJ, Barrett JR, Belij-Rammerstorfer S, Sharpe H, Makinson R, Morter R, et al. T cell and antibody responses induced by a single dose of ChAdOx1 nCoV-19 (AZD1222) vaccine in a phase 1/2 clinical trial. *Nat Med.* 2021;27(2):270-8.

- 1  
2  
3  
4  
5  
6  
7  
8  
9  
10  
11  
12  
13  
14  
15  
16  
17  
18  
19  
20  
21  
22  
23  
24  
25  
26  
27  
28  
29  
30  
31  
32  
33  
34  
35  
36  
37  
38  
39  
40  
41  
42  
43  
44  
45  
46  
47  
48  
49  
50  
51  
52  
53  
54  
55  
56  
57  
58  
59  
60
170. Folegatti PM, Ewer KJ, Aley PK, Angus B, Becker S, Belij-Rammerstorfer S, et al. Safety and immunogenicity of the ChAdOx1 nCoV-19 vaccine against SARS-CoV-2: a preliminary report of a phase 1/2, single-blind, randomised controlled trial. *Lancet*. 2020;396(10249):467-78.
171. Al Khames Aga QA, Alkhaffaf WH, Hatem TH, Nassir KF, Batineh Y, Dahham AT, et al. Safety of COVID-19 vaccines. *J Med Virol*. 2021;93(12):6588-94.
172. Sadoff J, Gray G, Vandebosch A, Cardenas V, Shukarev G, Grinsztejn B, et al. Safety and Efficacy of Single-Dose Ad26.COVS.2 Vaccine against Covid-19. *N Engl J Med*. 2021;384(23):2187-201.
173. Alter G, Yu J, Liu J, Chandrashekar A, Borducchi EN, Tostanoski LH, et al. Immunogenicity of Ad26.COVS.2 vaccine against SARS-CoV-2 variants in humans. *Nature*. 2021;596(7871):268-72.
174. Sadoff J, Le Gars M, Shukarev G, Heerwegh D, Truyers C, de Groot AM, et al. Interim Results of a Phase 1-2a Trial of Ad26.COVS.2 Covid-19 Vaccine. *N Engl J Med*. 2021;384(19):1824-35.
175. Keeton R, Richardson SI, Moyo-Gwete T, Hermanus T, Tincho MB, Benede N, et al. Prior infection with SARS-CoV-2 boosts and broadens Ad26.COVS.2 immunogenicity in a variant-dependent manner. *Cell Host Microbe*. 2021;29(11):1611-9 e5.
176. See I, Su JR, Lale A, Woo EJ, Guh AY, Shimabukuro TT, et al. US Case Reports of Cerebral Venous Sinus Thrombosis With Thrombocytopenia After Ad26.COVS.2 Vaccination, March 2 to April 21, 2021. *JAMA*. 2021;325(24):2448-56.
177. Baden LR, El Sahly HM, Essink B, Kotloff K, Frey S, Novak R, et al. Efficacy and Safety of the mRNA-1273 SARS-CoV-2 Vaccine. *N Engl J Med*. 2021;384(5):403-16.
178. Mukhopadhyay L, Yadav PD, Gupta N, Mohandas S, Patil DY, Shete-Aich A, et al. Comparison of the immunogenicity & protective efficacy of various SARS-CoV-2 vaccine candidates in non-human primates. *Indian J Med Res*. 2021;153(1 & 2):93-114.
179. Anderson EJ, Rouphael NG, Widge AT, Jackson LA, Roberts PC, Makhene M, et al. Safety and Immunogenicity of SARS-CoV-2 mRNA-1273 Vaccine in Older Adults. *N Engl J Med*. 2020;383(25):2427-38.
180. Jackson LA, Anderson EJ, Rouphael NG, Roberts PC, Makhene M, Coler RN, et al. An mRNA Vaccine against SARS-CoV-2 - Preliminary Report. *N Engl J Med*. 2020;383(20):1920-31.
181. Chu L, McPhee R, Huang W, Bennett H, Pajon R, Nestorova B, et al. A preliminary report of a randomized controlled phase 2 trial of the safety and immunogenicity of mRNA-1273 SARS-CoV-2 vaccine. *Vaccine*. 2021;39(20):2791-9.
182. Who.int [Internet]. Interim recommendations for use of the inactivated COVID-19 vaccine BIBP developed by China National Biotec Group (CNBG), Sinopharm. World Health Organisation. [28 October 2021; cited 7 January 2022]. Available from: <https://www.who.int/publications/i/item/WHO-2019-nCoV-vaccines-SAGE-recommendation-BIBP>
183. Who.int [Internet]. Background document on the inactivated vaccine Sinovac-CoronaVac against COVID-19. World Health Organisation. [1 June 2021; cited 13 October 2021]. Available from: [https://www.who.int/publications/i/item/WHO-2019-nCoV-vaccines-SAGE\\_recommendation-Sinovac-CoronaVac-background-2021.1](https://www.who.int/publications/i/item/WHO-2019-nCoV-vaccines-SAGE_recommendation-Sinovac-CoronaVac-background-2021.1)
184. Who.int [Internet]. Background document on the Bharat Biotech BBV152 COVAXIN® (COVID-19) vaccine. World Health Organisation. [3 November 2021; cited 7 January 2022]. Available from: <https://www.who.int/publications/i/item/WHO-2019-nCoV-vaccines-SAGE-recommendation-bbv152-covaxin-background>

- 1  
2  
3 185. Who.int [Internet]. WHO issues emergency use listing for eighth COVID-19 vaccine. World Health Organisation. [3 November 2021; cited 7 January 2022]. Available from: <https://www.who.int/news/item/03-11-2021-who-issues-emergency-use-listing-for-eighth-covid-19-vaccine>
- 8 186. Who.int [Internet]. WHO lists 9th COVID-19 vaccine for emergency use with aim to increase access to vaccination in lower-income countries. World Health Organisation. [17 December 2021; cited 7 January 2022]. Available from: <https://www.who.int/news/item/17-12-2021-who-lists-9th-covid-19-vaccine-for-emergency-use-with-aim-to-increase-access-to-vaccination-in-lower-income-countries>
- 14 187. Who.int [Internet]. WHO lists 10th COVID-19 vaccine for emergency use: Nuvaxovid. World Health Organisation. [21 December 2021; cited 7 January 2022]. Available from: <https://www.who.int/news/item/21-12-2021-who-lists-10th-covid-19-vaccine-for-emergency-use-nuvaxovid>
- 19 188. Who.int [Internet]. Interim recommendations for use of the Novavax NVX-CoV2373 vaccine against COVID-19. World Health Organisation. [20 December 2021; cited 7 January 2022]. Available from: <https://www.who.int/publications/i/item/WHO-2019-nCoV-vaccines-SAGE-recommendation-novavax-nvx-cov2373>
- 24 189. Mishra SK, Pradhan SK, Pati S, Sahu S, Nanda RK. Waning of Anti-spike Antibodies in AZD1222 (ChAdOx1) Vaccinated Healthcare Providers: A Prospective Longitudinal Study. *Cureus*. 2021;13(11):e19879.
- 28 190. Tre-Hardy M, Cupaiolo R, Wilmet A, Antoine-Moussiaux T, Della Vecchia A, Horeanga A, et al. Immunogenicity of mRNA-1273 COVID vaccine after 6 months surveillance in health care workers; a third dose is necessary. *J Infect*. 2021;83(5):559-64.
- 31 191. Shrotri M, Navaratnam AMD, Nguyen V, Byrne T, Geismar C, Fragaszy E, et al. Spike-antibody waning after second dose of BNT162b2 or ChAdOx1. *Lancet*. 2021;398(10298):385-7.
- 35 192. Chemaitelly H, Tang P, Hasan MR, AlMukdad S, Yassine HM, Benslimane FM, et al. Waning of BNT162b2 Vaccine Protection against SARS-CoV-2 Infection in Qatar. *N Engl J Med*. 2021.
- 39 193. Mizrahi B, Lotan R, Kalkstein N, Peretz A, Perez G, Ben-Tov A, et al. Correlation of SARS-CoV-2 Breakthrough Infections to Time-from-vaccine; Preliminary Study. *MedRxiv* [Preprint]. 2021.
- 42 194. Thomas SJ, Moreira ED, Kitchin N, Absalon J, Gurtman A, Lockhart S, et al. Six Month Safety and Efficacy of the BNT162b2 mRNA COVID-19 Vaccine. *MedRxiv* [Preprint]. 2021.
- 45 195. Tre-Hardy M, Cupaiolo R, Wilmet A, Antoine-Moussiaux T, Della Vecchia A, Horeanga A, et al. Six-month interim analysis of ongoing immunogenicity surveillance of the mRNA-1273 vaccine in healthcare workers: A third dose is expected. *J Infect*. 2021.
- 48 196. Almendro-Vazquez P, Laguna-Goya R, Ruiz-Ruigomez M, Utrero-Rico A, Lalueza A, Maestro de la Calle G, et al. Longitudinal dynamics of SARS-CoV-2-specific cellular and humoral immunity after natural infection or BNT162b2 vaccination. *PLoS Pathog*. 2021;17(12):e1010211.
- 53 197. Cohen KW, Linderman SL, Moodie Z, Czartoski J, Lai L, Mantus G, et al. Longitudinal analysis shows durable and broad immune memory after SARS-CoV-2 infection with persisting antibody responses and memory B and T cells. *Cell Rep Med*. 2021;2(7):100354.
- 57 198. Zeng G, Wu Q, Pan H, Li M, Yang J, Wang L, et al. Immunogenicity and safety of a third dose of CoronaVac, and immune persistence of a two-dose schedule, in healthy adults: interim results from two single-centre, double-blind, randomised, placebo-controlled phase 2 clinical trials. *Lancet Infect Dis*. 2021.



199. Choi A, Koch M, Wu K, Chu L, Ma L, Hill A, et al. Safety and immunogenicity of SARS-CoV-2 variant mRNA vaccine boosters in healthy adults: an interim analysis. *Nat Med*. 2021.
200. Flaxman A, Marchevsky NG, Jenkin D, Aboagye J, Aley PK, Angus B, et al. Reactogenicity and immunogenicity after a late second dose or a third dose of ChAdOx1 nCoV-19 in the UK: a substudy of two randomised controlled trials (COV001 and COV002). *Lancet*. 2021;398(10304):981-90.
201. Iketani S, Liu L, Nair MS, Mohri H, Wang M, Huang Y, et al. A third COVID-19 vaccine shot markedly boosts neutralizing antibody potency and breadth *MedRxiv [Preprint]*. 2021.
202. Garcia-Beltran WF, St Denis KJ, Hoelzemer A, Lam EC, Nitido AD, Sheehan ML, et al. mRNA-based COVID-19 vaccine boosters induce neutralizing immunity against SARS-CoV-2 Omicron variant. *MedRxiv [Preprint]*. 2021.
203. Yorsaeng R, Suntronwong N, Phowatthanasathian H, Assawakosri S, Kanokudom S, Thongmee T, et al. Immunogenicity of a third dose viral-vectored COVID-19 vaccine after receiving two-dose inactivated vaccines in healthy adults. *Vaccine*. 2022;40(3):524-30.
204. Munro APS, Janani L, Cornelius V, Aley PK, Babbage G, Baxter D, et al. Safety and immunogenicity of seven COVID-19 vaccines as a third dose (booster) following two doses of ChAdOx1 nCov-19 or BNT162b2 in the UK (COV-BOOST): a blinded, multicentre, randomised, controlled, phase 2 trial. *Lancet*. 2021;398(10318):2258-76.
205. Madelon N, Heikkilä N, Sabater Royo I, Fontannaz P, Breville G, Lauper K, et al. Omicron-specific cytotoxic T-cell responses are boosted following a third dose of mRNA COVID-19 vaccine in anti-CD20-treated multiple sclerosis patients *MedRxiv [Preprint]*. 2021.
206. Bar-On YM, Goldberg Y, Mandel M, Bodenheimer O, Freedman L, Kalkstein N, et al. Protection of BNT162b2 Vaccine Booster against Covid-19 in Israel. *N Engl J Med*. 2021;385(15):1393-400.
207. Barda N, Dagan N, Cohen C, Hernan MA, Lipsitch M, Kohane IS, et al. Effectiveness of a third dose of the BNT162b2 mRNA COVID-19 vaccine for preventing severe outcomes in Israel: an observational study. *Lancet*. 2021;398(10316):2093-100.
208. Arbel R, Hammerman A, Sergienko R, Friger M, Peretz A, Netzer D, et al. BNT162b2 Vaccine Booster and Mortality Due to Covid-19. *N Engl J Med*. 2021;385(26):2413-20.
209. Spitzer A, Angel Y, Marudi O, Zeltser D, Saiag E, Goldshmidt H, et al. Association of a Third Dose of BNT162b2 Vaccine With Incidence of SARS-CoV-2 Infection Among Health Care Workers in Israel. *JAMA*. 2022.
210. Bar-On YM, Goldberg Y, Mandel M, Bodenheimer O, Freedman L, Alroy-Preis S, et al. Protection against Covid-19 by BNT162b2 Booster across Age Groups. *N Engl J Med*. 2021;385(26):2421-30.
211. Levine-Tiefenbrun M, Yelin I, Alapi H, Katz R, Herzel E, Kuint J, et al. Viral loads of Delta-variant SARS-CoV-2 breakthrough infections after vaccination and booster with BNT162b2. *Nat Med*. 2021;27(12):2108-10.
212. Andrews N, Stowe J, Kirsebom F, Toffa S, Rickeard T, Gallagher E, et al. Effectiveness of COVID-19 vaccines against the Omicron (B.1.1.529) variant of concern. *medRxiv [Preprint]*. 2021.
213. Hansen CH, Schelde AB, Moustsen-Helm IR, Emborg H-D, Krause TG, Mølbak K, et al. Vaccine effectiveness against SARS-CoV-2 infection with the Omicron or Delta variants following a two-dose or booster BNT162b2 or mRNA-1273 vaccination series: A Danish cohort study *MedRxiv [Preprint]*. 2021.
214. Lusvardi S, Pollett SD, Neerukonda SN, Wang W, Wang R, Vassell R, et al. SARS-CoV-2 Omicron neutralization by therapeutic antibodies, convalescent sera, and post-mRNA vaccine booster. *BioRxiv [Preprint]*. 2021.

- 1  
2  
3  
4  
5  
6  
7  
8  
9  
10  
11  
12  
13  
14  
15  
16  
17  
18  
19  
20  
21  
22  
23  
24  
25  
26  
27  
28  
29  
30  
31  
32  
33  
34  
35  
36  
37  
38  
39  
40  
41  
42  
43  
44  
45  
46  
47  
48  
49  
50  
51  
52  
53  
54  
55  
56  
57  
58  
59  
60
215. Cdc.gov [Internet]. CDC Recommends Pfizer Booster at 5 Months, Additional Primary Dose for Certain Immunocompromised Children. Centers for Disease Control and Prevention. [4 January 2022; cited 7 January 2022]. Available from: <https://www.cdc.gov/media/releases/2022/s0104-Pfizer-Booster.html>
  216. Wu K, Choi A, Koch M, Elbashir S, Ma L, Lee D, et al. Variant SARS-CoV-2 mRNA vaccines confer broad neutralization as primary or booster series in mice. *Vaccine*. 2021;39(51):7394-400.
  217. Covid19-trials.com [Internet]. Global Coronavirus COVID-19 Clinical Trial Tracker. Cytel Inc. [cited 12 January 2022]. Available from: <https://www.covid19-trials.com/>
  218. Gov.uk [Internet]. First oral antiviral for COVID-19, Lagevrio (molnupiravir), approved by MHRA. Medicines and Healthcare products Regulatory Agency. [4 November 2021; cited 12 January 2022]. Available from: <https://www.gov.uk/government/news/first-oral-antiviral-for-covid-19-lagevrio-molnupiravir-approved-by-mhra>
  219. Gov.uk [Internet]. Oral COVID-19 antiviral, Paxlovid, approved by UK regulator. Medicines and Healthcare products Regulatory Agency. [31 December 2021; cited 12 January 2022]. Available from: <https://www.gov.uk/government/news/oral-covid-19-antiviral-paxlovid-approved-by-uk-regulator>
  220. Fda.gov [Internet]. Coronavirus (COVID-19) Update: FDA Authorizes Additional Oral Antiviral for Treatment of COVID-19 in Certain Adults. U.S. Food and Drug Administration. [23 December 2021; cited 12 January 2022]. Available from: <https://www.fda.gov/news-events/press-announcements/coronavirus-covid-19-update-fda-authorizes-additional-oral-antiviral-treatment-covid-19-certain>
  221. Fda.gov [Internet]. Coronavirus (COVID-19) Update: FDA Authorizes First Oral Antiviral for Treatment of COVID-19. U.S. Food and Drug Administration. [22 December 2021; cited 12 January 2022]. Available from: <https://www.fda.gov/news-events/press-announcements/coronavirus-covid-19-update-fda-authorizes-first-oral-antiviral-treatment-covid-19>
  222. ema.europa.eu [Internet]. EMA issues advice on use of Lagevrio (molnupiravir) for the treatment of COVID-19. European Medicines Agency. [19 November 2021.; cited 12 January 2022]. Available from: <https://www.ema.europa.eu/en/news/ema-issues-advice-use-lagevrio-molnupiravir-treatment-covid-19>
  223. ema.europa.eu [Internet]. EMA issues advice on use of Paxlovid (PF-07321332 and ritonavir) for the treatment of COVID-19: rolling review starts in parallel. European Medicines Agency. [16 December 2021.; cited 12 January 2022]. Available from: <https://www.ema.europa.eu/en/news/ema-issues-advice-use-paxlovid-pf-07321332-ritonavir-treatment-covid-19-rolling-review-starts>
  224. Gov.uk [Internet]. MHRA approves Xevudy (sotrovimab), a COVID-19 treatment found to cut hospitalisation and death by 79%. Medicines and Healthcare products Regulatory Agency. [2 December 2021; cited 12 January 2022]. Available from: [https://www.gov.uk/government/news/mhra-approves-xevudy-sotrovimab-a-covid-19-treatment-found-to-cut-hospitalisation-and-death-by-79#:~:text=and%20licensing%20guidance-,MHRA%20approves%20Xevudy%20\(sotrovimab\)%2C%20a%20COVID%2D19%20treatment,risk%20of%20developing%20severe%20disease.](https://www.gov.uk/government/news/mhra-approves-xevudy-sotrovimab-a-covid-19-treatment-found-to-cut-hospitalisation-and-death-by-79#:~:text=and%20licensing%20guidance-,MHRA%20approves%20Xevudy%20(sotrovimab)%2C%20a%20COVID%2D19%20treatment,risk%20of%20developing%20severe%20disease.)
  225. Fda.gov [Internet]. Coronavirus (COVID-19) Update: FDA Authorizes Additional Monoclonal Antibody for Treatment of COVID-19. U.S. Food and Drug Administration. [26 May 2021; cited 12 January 2022]. Available from: <https://www.fda.gov/news-events/press->

- announcements/coronavirus-covid-19-update-fda-authorizes-additional-monoclonal-antibody-treatment-covid-19
226. [ema.europa.eu](https://www.ema.europa.eu) [Internet]. COVID-19: EMA recommends authorisation of antibody medicine Xevudy. European Medicines Agency. [16 December 2021.; cited 12 January 2022]. Available from: [https://www.ema.europa.eu/en/news/covid-19-ema-recommends-authorisation-antibody-medicine-xevudy#:~:text=EMA's%20human%20medicines%20committee%20\(CHMP,medicine%20together%20with%20Vir%20Biotechnology](https://www.ema.europa.eu/en/news/covid-19-ema-recommends-authorisation-antibody-medicine-xevudy#:~:text=EMA's%20human%20medicines%20committee%20(CHMP,medicine%20together%20with%20Vir%20Biotechnology).
227. [Who.int](https://www.who.int) [Internet]. Therapeutics and COVID-19: living guideline. World Health Organisation. [14 January 2022; cited 21 January 2022] Available from: <https://www.who.int/publications/i/item/WHO-2019-nCoV-therapeutics-2022.1>
228. [Nice.org.uk](https://www.nice.org.uk) [Internet]. COVID-19 rapid guideline: managing COVID-19 NICE guideline [NG191]. National Institute for Health and Care Excellence. [16 December 2021; cited 21 January 2022]. Available from: <https://www.nice.org.uk/guidance/ng191>
229. [Gov.uk](https://www.gov.uk) [Internet]. MHRA guidance on coronavirus (COVID-19). Medicines and Healthcare products Regulatory Agency. [16 September 2021; cited 21 January 2022]. Available from: <https://www.gov.uk/government/collections/mhra-guidance-on-coronavirus-covid-19>
230. [ecdc.europa.eu](https://www.ecdc.europa.eu) [Internet]. All resources on COVID-19 – Guidance and technical reports. [2022; cited 21 January 2022]. Available from: <https://www.ecdc.europa.eu/en/covid-19/all-reports-covid-19>
231. [Nih.gov](https://www.covid19treatmentguidelines.nih.gov/) [Internet]. Coronavirus Disease 2019 (COVID-19) Treatment Guidelines. National Institutes of Health [19 January 2022; cited 21 January 2022]. Available from: <https://www.covid19treatmentguidelines.nih.gov/>
232. [Cdc.gov](https://www.cdc.gov) [Internet]. Guidance for COVID-19. Centers for Disease Control and Prevention. [15 March 2021; cited 21 January 2022]. Available from: <https://www.cdc.gov/coronavirus/2019-ncov/communication/guidance.html>
233. Blundell R, Costa Dias M, Joyce R, Xu X. COVID-19 and Inequalities. *Fisc Stud.* 2020.
234. Chadeau-Hyam M, Bodinier B, Elliott J, Whitaker MD, Tzoulaki I, Vermeulen R, et al. Risk factors for positive and negative COVID-19 tests: a cautious and in-depth analysis of UK biobank data. *Int J Epidemiol.* 2020;49(5):1454-67.
235. Patel JA, Nielsen FBH, Badiani AA, Assi S, Unadkat VA, Patel B, et al. Poverty, inequality and COVID-19: the forgotten vulnerable. *Public Health.* 2020;183:110-1.
236. Cohen J, Rodgers YVM. Contributing factors to personal protective equipment shortages during the COVID-19 pandemic. *Prev Med.* 2020;141:106263.
237. [Who.int](https://www.who.int) [Internet]. Vaccine Equity. World Health Organisation. [cited 10 January 2022]. Available from: <https://www.who.int/campaigns/vaccine-equity>
238. [parliament.uk](https://publications.parliament.uk) [Internet]. Coronavirus: lessons learned to date. The House of Commons, Science and Technology Committee, and Health and Social Care Committee. [12 October 2021; cited 10 January 2022]. Available from: <https://publications.parliament.uk/pa/cm5802/cmselect/cmsctech/92/9203.htm>
239. Ball P. The lightning-fast quest for COVID vaccines - and what it means for other diseases. *Nature.* 2021;589(7840):16-8.
240. Summers J, Cheng HY, Lin HH, Barnard LT, Kvalsvig A, Wilson N, et al. Potential lessons from the Taiwan and New Zealand health responses to the COVID-19 pandemic. *Lancet Reg Health West Pac.* 2020;4:100044.

- 1
  - 2
  - 3
  - 4
  - 5
  - 6
  - 7
  - 8
  - 9
  - 10
  - 11
  - 12
  - 13
  - 14
  - 15
  - 16
  - 17
  - 18
  - 19
  - 20
  - 21
  - 22
  - 23
  - 24
  - 25
  - 26
  - 27
  - 28
  - 29
  - 30
  - 31
  - 32
  - 33
  - 34
  - 35
  - 36
  - 37
  - 38
  - 39
  - 40
  - 41
  - 42
  - 43
  - 44
  - 45
  - 46
  - 47
  - 48
  - 49
  - 50
  - 51
  - 52
  - 53
  - 54
  - 55
  - 56
  - 57
  - 58
  - 59
  - 60
241. Dagan N, Barda N, Kepten E, Miron O, Perchik S, Katz MA, et al. BNT162b2 mRNA Covid-19 Vaccine in a Nationwide Mass Vaccination Setting. *N Engl J Med.* 2021;384(15):1412-23.
242. Lopez Bernal J, Andrews N, Gower C, Gallagher E, Simmons R, Thelwall S, et al. Effectiveness of Covid-19 Vaccines against the B.1.617.2 (Delta) Variant. *N Engl J Med.* 2021;385(7):585-94.
243. Abu-Raddad LJ, Chemaitelly H, Butt AA, National Study Group for C-V. Effectiveness of the BNT162b2 Covid-19 Vaccine against the B.1.1.7 and B.1.351 Variants. *N Engl J Med.* 2021;385(2):187-9.
244. Chung H, He S, Nasreen S, Sundaram ME, Buchan SA, Wilson SE, et al. Effectiveness of BNT162b2 and mRNA-1273 covid-19 vaccines against symptomatic SARS-CoV-2 infection and severe covid-19 outcomes in Ontario, Canada: test negative design study. *BMJ.* 2021;374:n1943.
245. Nasreen S, Chung H, He S, Brown KA, Gubbay JB, Buchan SA, et al. Effectiveness of mRNA and ChAdOx1 COVID-19 vaccines against symptomatic SARS CoV-2 infection and severe outcomes with variants of concern in Ontario. *MedRxiv [Preprint].* 2021.
246. Puranik A, Lenehan PJ, Silvert E, Niesen MJM, Corchado-Garcia J, O'Horo JC, et al. Comparison of two highly-effective mRNA vaccines for COVID-19 during periods of Alpha and Delta variant prevalence. *MedRxiv [Preprint].* 2021.
247. Julia Stowe, Nick Andrews, Charlotte Gower, Eileen Gallagher, Lara Utsi, Ruth Simmons, et al. Effectiveness of COVID-19 vaccines against hospital admission with the Delta (B.1.617.2) variant. *Public Health England [preprint].* 2021.
248. Lopez Bernal J, Andrews N, Gower C, Robertson C, Stowe J, Tessier E, et al. Effectiveness of the Pfizer-BioNTech and Oxford-AstraZeneca vaccines on covid-19 related symptoms, hospital admissions, and mortality in older adults in England: test negative case-control study. *BMJ.* 2021;373:n1088.
249. Skowronski DM, Setayeshgar S, Zou M, Prystajecky N, Tyson JR, Galanis E, et al. Single-dose mRNA vaccine effectiveness against SARS-CoV-2, including Alpha and Gamma variants: a test-negative design in adults 70 years and older in British Columbia, Canada. *Clin Infect Dis.* 2021.
250. Carazo S, Talbot D, Boulianne N, Brisson M, Gilca R, Deceuninck G, et al. Single-dose mRNA vaccine effectiveness against SARS-CoV-2 in healthcare workers extending 16 weeks post-vaccination: a test-negative design from Quebec, Canada. *Clin Infect Dis.* 2021.
251. Charmet T, Schaeffer L, Grant R, Galmiche S, Cheny O, Von Platen C, et al. Impact of original, B.1.1.7, and B.1.351/P.1 SARS-CoV-2 lineages on vaccine effectiveness of two doses of COVID-19 mRNA vaccines: Results from a nationwide case-control study in France. *Lancet Reg Health Eur.* 2021;8:100171.
252. Tang P, Hasan MR, Chemaitelly H, Yassine HM, Benslimane FM, Al Khatib HA, et al. BNT162b2 and mRNA-1273 COVID-19 vaccine effectiveness against the SARS-CoV-2 Delta variant in Qatar. *Nat Med.* 2021;27(12):2136-43.
253. Hall VJ, Foulkes S, Saei A, Andrews N, Oguti B, Charlett A, et al. COVID-19 vaccine coverage in health-care workers in England and effectiveness of BNT162b2 mRNA vaccine against infection (SIREN): a prospective, multicentre, cohort study. *Lancet.* 2021;397(10286):1725-35.
254. Haas EJ, Angulo FJ, McLaughlin JM, Anis E, Singer SR, Khan F, et al. Impact and effectiveness of mRNA BNT162b2 vaccine against SARS-CoV-2 infections and COVID-19 cases, hospitalisations, and deaths following a nationwide vaccination campaign in Israel: an observational study using national surveillance data. *Lancet.* 2021;397(10287):1819-29.

- 1  
2  
3  
4  
5  
6  
7  
8  
9  
10  
11  
12  
13  
14  
15  
16  
17  
18  
19  
20  
21  
22  
23  
24  
25  
26  
27  
28  
29  
30  
31  
32  
33  
34  
35  
36  
37  
38  
39  
40  
41  
42  
43  
44  
45  
46  
47  
48  
49  
50  
51  
52  
53  
54  
55  
56  
57  
58  
59  
60
255. Nanduri S, Pilishvili T, Derado G, Soe MM, Dollard P, Wu H, et al. Effectiveness of Pfizer-BioNTech and Moderna Vaccines in Preventing SARS-CoV-2 Infection Among Nursing Home Residents Before and During Widespread Circulation of the SARS-CoV-2 B.1.617.2 (Delta) Variant - National Healthcare Safety Network, March 1-August 1, 2021. *MMWR Morb Mortal Wkly Rep.* 2021;70(34):1163-6.
256. Fowlkes A, Gaglani M, Groover K, Thiese MS, Tyner H, Ellingson K, et al. Effectiveness of COVID-19 Vaccines in Preventing SARS-CoV-2 Infection Among Frontline Workers Before and During B.1.617.2 (Delta) Variant Predominance - Eight U.S. Locations, December 2020-August 2021. *MMWR Morb Mortal Wkly Rep.* 2021;70(34):1167-9.
257. Lefevre B, Tondeur L, Madec Y, Grant R, Lina B, van der Werf S, et al. Beta SARS-CoV-2 variant and BNT162b2 vaccine effectiveness in long-term care facilities in France. *Lancet Healthy Longev.* 2021.
258. Pouwels KB, Pritchard E, Matthews PC, Stoesser N, Eyre DW, Vihta K-D, et al. Effect of Delta variant on viral burden and vaccine effectiveness against new SARS-CoV-2 infections in the UK. *Nature Medicine.* 2021.
259. Williams C, Al-Bargash D, Macalintal C, Stuart R, Seth A, Latham J, et al. COVID-19 Outbreak Associated with a SARS-CoV-2 P.1 Lineage in a Long-Term Care Home after Implementation of a Vaccination Program - Ontario, April-May 2021. *Clin Infect Dis.* 2021.
260. Fabiani M, Ramigni M, Gobetto V, Mateo-Urdiales A, Pezzotti P, Piovesan C. Effectiveness of the Comirnaty (BNT162b2, BioNTech/Pfizer) vaccine in preventing SARS-CoV-2 infection among healthcare workers, Treviso province, Veneto region, Italy, 27 December 2020 to 24 March 2021. *Euro Surveill.* 2021;26(17).
261. Thomas SJ, Moreira ED, Jr., Kitchin N, Absalon J, Gurtman A, Lockhart S, et al. Safety and Efficacy of the BNT162b2 mRNA Covid-19 Vaccine through 6 Months. *N Engl J Med.* 2021;385(19):1761-73.
262. Angel Y, Spitzer A, Henig O, Saiag E, Sprecher E, Padova H, et al. Association Between Vaccination With BNT162b2 and Incidence of Symptomatic and Asymptomatic SARS-CoV-2 Infections Among Health Care Workers. *JAMA.* 2021;325(24):2457-65.
263. Bjork J, Inghammar M, Moghaddassi M, Rasmussen M, Malmqvist U, Kahn F. High level of protection against COVID-19 after two doses of BNT162b2 vaccine in the working age population - first results from a cohort study in Southern Sweden. *Infect Dis (Lond).* 2022;54(2):128-33.
264. Cabezas C, Coma E, Mora-Fernandez N, Li X, Martinez-Marcos M, Fina F, et al. Associations of BNT162b2 vaccination with SARS-CoV-2 infection and hospital admission and death with covid-19 in nursing homes and healthcare workers in Catalonia: prospective cohort study. *BMJ.* 2021;374:n1868.
265. Emborg H-D, Valentiner-Branth P, Schelde AB, Nielsen KF, Gram MA, Moustsen-Helms IR, et al. Vaccine effectiveness of the BNT162b2 mRNA COVID-19 vaccine against RT-PCR confirmed SARS-CoV2 infections, hospitalisations and mortality in prioritised risk groups. *MedRxiv [Preprint].* 2021.
266. Gras-Valenti P, Chico-Sanchez P, Algado-Selles N, Jimenez-Sepulveda NJ, Gomez-Sotero IL, Fuster-Perez M, et al. [Effectiveness of the first dose of BNT162b2 vaccine to preventing covid-19 in healthcare personnel.]. *Rev Esp Salud Publica.* 2021;95.
267. Mason TFD, Whitston M, Hodgson J, Watkinson RE, Lau YS, Abdulrazeg O, et al. Effects of BNT162b2 mRNA vaccine on COVID-19 infection and hospitalisation amongst older people: matched case control study for England. *BMC Med.* 2021;19(1):275.

- 1  
2  
3  
4  
5  
6  
7  
8  
9  
10  
11  
12  
13  
14  
15  
16  
17  
18  
19  
20  
21  
22  
23  
24  
25  
26  
27  
28  
29  
30  
31  
32  
33  
34  
35  
36  
37  
38  
39  
40  
41  
42  
43  
44  
45  
46  
47  
48  
49  
50  
51  
52  
53  
54  
55  
56  
57  
58  
59  
60
268. Monge S, Olmedo C, Alejos B, Lapena MF, Sierra MJ, Limia A, et al. Direct and Indirect Effectiveness of mRNA Vaccination against Severe Acute Respiratory Syndrome Coronavirus 2 in Long-Term Care Facilities, Spain. *Emerg Infect Dis*. 2021;27(10):2595-603.
269. Pritchard E, Matthews PC, Stoesser N, Eyre DW, Gethings O, Vihta KD, et al. Impact of vaccination on new SARS-CoV-2 infections in the United Kingdom. *Nat Med*. 2021;27(8):1370-8.
270. Regev-Yochay G, Amit S, Bergwerk M, Lipsitch M, Leshem E, Kahn R, et al. Decreased infectivity following BNT162b2 vaccination: A prospective cohort study in Israel. *Lancet Reg Health Eur*. 2021;7:100150.
271. Shrotri M, Krutikov M, Palmer T, Giddings R, Azmi B, Subbarao S, et al. Vaccine effectiveness of the first dose of ChAdOx1 nCoV-19 and BNT162b2 against SARS-CoV-2 infection in residents of long-term care facilities in England (VIVALDI): a prospective cohort study. *Lancet Infect Dis*. 2021;21(11):1529-38.
272. Swift MD, Breeher LE, Tande AJ, Tommaso CP, Hainy CM, Chu H, et al. Effectiveness of Messenger RNA Coronavirus Disease 2019 (COVID-19) Vaccines Against Severe Acute Respiratory Syndrome Coronavirus 2 (SARS-CoV-2) Infection in a Cohort of Healthcare Personnel. *Clin Infect Dis*. 2021;73(6):e1376-e9.
273. Thompson MG, Burgess JL, Naleway AL, Tyner H, Yoon SK, Meece J, et al. Prevention and Attenuation of Covid-19 with the BNT162b2 and mRNA-1273 Vaccines. *N Engl J Med*. 2021;385(4):320-9.
274. Frencck RW, Jr., Klein NP, Kitchin N, Gurtman A, Absalon J, Lockhart S, et al. Safety, Immunogenicity, and Efficacy of the BNT162b2 Covid-19 Vaccine in Adolescents. *N Engl J Med*. 2021;385(3):239-50.
275. June Choe Y, Yi S, Hwang I, Kim J, Park YJ, Cho E, et al. Safety and effectiveness of BNT162b2 mRNA Covid-19 vaccine in adolescents. *Vaccine*. 2021.
276. Lutrick K, Rivers P, Yoo YM, Grant L, Hollister J, Jovel K, et al. Interim Estimate of Vaccine Effectiveness of BNT162b2 (Pfizer-BioNTech) Vaccine in Preventing SARS-CoV-2 Infection Among Adolescents Aged 12-17 Years - Arizona, July-December 2021. *MMWR Morb Mortal Wkly Rep*. 2021;70(5152):1761-5.
277. Glatman-Freedman A, Bromberg M, Dichtiar R, Hershkovitz Y, Keinan-Boker L. The BNT162b2 vaccine effectiveness against new COVID-19 cases and complications of breakthrough cases: A nation-wide retrospective longitudinal multiple cohort analysis using individualised data. *EBioMedicine*. 2021;72:103574.
278. Pilishvili T, Fleming-Dutra KE, Farrar JL, Gierke R, Mohr NM, Talan DA, et al. Interim Estimates of Vaccine Effectiveness of Pfizer-BioNTech and Moderna COVID-19 Vaccines Among Health Care Personnel - 33 U.S. Sites, January-March 2021. *MMWR Morb Mortal Wkly Rep*. 2021;70(20):753-8.
279. Martinez-Baz I, Miqueleiz A, Casado I, Navascues A, Trobajo-Sanmartin C, Burgui C, et al. Effectiveness of COVID-19 vaccines in preventing SARS-CoV-2 infection and hospitalisation, Navarre, Spain, January to April 2021. *Euro Surveill*. 2021;26(21).
280. Vasileiou E, Simpson CR, Shi T, Kerr S, Agrawal U, Akbari A, et al. Interim findings from first-dose mass COVID-19 vaccination roll-out and COVID-19 hospital admissions in Scotland: a national prospective cohort study. *Lancet*. 2021;397(10285):1646-57.
281. [ecdc.europa.eu](https://ecdc.europa.eu) [Internet]. Interim analysis of COVID-19 vaccine effectiveness against Severe Acute Respiratory Infection due to laboratory-confirmed SARS-CoV-2 among individuals aged 50 years and older, ECDC multi-country study – first update. European Centre for Disease Prevention and Control. [20 January 2022; cited 24 January 2022]. Available from:

- 1  
2  
3 [https://www.ecdc.europa.eu/en/publications-data/interim-analysis-covid-19-vaccine-](https://www.ecdc.europa.eu/en/publications-data/interim-analysis-covid-19-vaccine-effectiveness-against-severe-acute-respiratory)  
4 [effectiveness-against-severe-acute-respiratory](https://www.ecdc.europa.eu/en/publications-data/interim-analysis-covid-19-vaccine-effectiveness-against-severe-acute-respiratory)  
5  
6 282. Rosenberg ES, Dorabawila V, Easton D, Bauer UE, Kumar J, Hoen R, et al. Covid-19  
7 Vaccine Effectiveness in New York State. *N Engl J Med*. 2022;386(2):116-27.  
8 283. Olson SM, Newhams MM, Halasa NB, Price AM, Boom JA, Sahni LC, et al. Effectiveness  
9 of BNT162b2 Vaccine against Critical Covid-19 in Adolescents. *N Engl J Med*. 2022.  
10 284. Zambrano LD, Newhams MM, Olson SM, Halasa NB, Price AM, Boom JA, et al.  
11 Effectiveness of BNT162b2 (Pfizer-BioNTech) mRNA Vaccination Against Multisystem  
12 Inflammatory Syndrome in Children Among Persons Aged 12-18 Years - United States, July-  
13 December 2021. *MMWR Morb Mortal Wkly Rep*. 2022;71(2):52-8.  
14 285. Emary KRW, Golubchik T, Aley PK, Ariani CV, Angus B, Bibi S, et al. Efficacy of ChAdOx1  
15 nCoV-19 (AZD1222) vaccine against SARS-CoV-2 variant of concern 202012/01 (B.1.1.7): an  
16 exploratory analysis of a randomised controlled trial. *Lancet*. 2021;397(10282):1351-62.  
17 286. [astrazeneca.com](https://www.astrazeneca.com) [Internet]. AZD1222 US Phase III trial met primary efficacy endpoint  
18 in preventing COVID-19 at interim analysis. AstraZeneca. [22 March 2021; cited 15 October  
19 2021]. Available from: [https://www.astrazeneca.com/media-centre/press-](https://www.astrazeneca.com/media-centre/press-releases/2021/astrazeneca-us-vaccine-trial-met-primary-endpoint.html)  
20 [releases/2021/astrazeneca-us-vaccine-trial-met-primary-endpoint.html](https://www.astrazeneca.com/media-centre/press-releases/2021/astrazeneca-us-vaccine-trial-met-primary-endpoint.html)  
21  
22 287. Voysey M, Clemens SAC, Madhi SA, Weckx LY, Folegatti PM, Aley PK, et al. Safety and  
23 efficacy of the ChAdOx1 nCoV-19 vaccine (AZD1222) against SARS-CoV-2: an interim analysis  
24 of four randomised controlled trials in Brazil, South Africa, and the UK. *Lancet*.  
25 2021;397(10269):99-111.  
26 288. Madhi SA, Baillie V, Cutland CL, Voysey M, Koen AL, Fairlie L, et al. Efficacy of the  
27 ChAdOx1 nCoV-19 Covid-19 Vaccine against the B.1.351 Variant. *N Engl J Med*.  
28 2021;384(20):1885-98.  
29 289. Pramod S, Govindan D, Ramasubramani P, Kar SS, Aggarwal R, Manoharan N, et al.  
30 Effectiveness of Covishield vaccine in preventing Covid-19 – A test-negative case control study.  
31 *MedRxiv [Preprint]*. 2021.  
32 290. Falsey AR, Sobieszczyk ME, Hirsch I, Sproule S, Robb ML, Corey L, et al. Phase 3 Safety  
33 and Efficacy of AZD1222 (ChAdOx1 nCoV-19) Covid-19 Vaccine. *N Engl J Med*.  
34 2021;385(25):2348-60.  
35 291. Clemens SAC, Folegatti PM, Emary KRW, Weckx LY, Ratcliff J, Bibi S, et al. Efficacy of  
36 ChAdOx1 nCoV-19 (AZD1222) vaccine against SARS-CoV-2 lineages circulating in Brazil. *Nat*  
37 *Commun*. 2021;12(1):5861.  
38 292. Voysey M, Costa Clemens SA, Madhi SA, Weckx LY, Folegatti PM, Aley PK, et al. Single-  
39 dose administration and the influence of the timing of the booster dose on immunogenicity  
40 and efficacy of ChAdOx1 nCoV-19 (AZD1222) vaccine: a pooled analysis of four randomised  
41 trials. *Lancet*. 2021;397(10277):881-91.  
42 293. Bhattacharya A, Ranjan P, Ghosh T, Agarwal H, Seth S, Maher GT, et al. Evaluation of  
43 the dose-effect association between the number of doses and duration since the last dose of  
44 COVID-19 vaccine, and its efficacy in preventing the disease and reducing disease severity: A  
45 single centre, cross-sectional analytical study from India. *Diabetes Metab Syndr*.  
46 2021;15(5):102238.  
47 294. Malathi Murugesan, Prasad Mathews, Hema Paul, Rajiv Karthik, Joy John Mammen,  
48 Rupali. P. Protective Effect Conferred by Prior Infection and Vaccination on COVID-19 in a  
49 Healthcare Worker Cohort in South India. *SSRN [Preprint]*. 2021.  
50 295. Alencar CH, Cavalcanti LPG, Almeida MM, Barbosa PPL, Cavalcante KKS, Melo DN, et  
51 al. High Effectiveness of SARS-CoV-2 Vaccines in Reducing COVID-19-Related Deaths in over  
52 75-Year-Olds, Ceara State, Brazil. *Trop Med Infect Dis*. 2021;6(3).  
53  
54  
55  
56  
57  
58  
59  
60

- 1
  - 2
  - 3
  - 4
  - 5
  - 6
  - 7
  - 8
  - 9
  - 10
  - 11
  - 12
  - 13
  - 14
  - 15
  - 16
  - 17
  - 18
  - 19
  - 20
  - 21
  - 22
  - 23
  - 24
  - 25
  - 26
  - 27
  - 28
  - 29
  - 30
  - 31
  - 32
  - 33
  - 34
  - 35
  - 36
  - 37
  - 38
  - 39
  - 40
  - 41
  - 42
  - 43
  - 44
  - 45
  - 46
  - 47
  - 48
  - 49
  - 50
  - 51
  - 52
  - 53
  - 54
  - 55
  - 56
  - 57
  - 58
  - 59
  - 60
296. Cerqueira-Silva T, Oliveira VdA, Pescarini J, Bertoldo Júnior J, Machado TM, Flores-Ortiz R, et al. The effectiveness of Vaxzevria and CoronaVac vaccines: A nationwide longitudinal retrospective study of 61 million Brazilians (VigiVac-COVID19). . MedRxiv [Preprint]. 2021.
297. Otavio T Ranzani, Rogério dos Santos Leite, Larissa Domingues Castilho, Crhistine Cavalheiro Maymone Gonçalves, Geraldo Resende, Rosana Leite de Melo, et al. Vaccine effectiveness of Ad26.COV2.S against symptomatic COVID-19 and clinical outcomes in Brazil: a test-negative study design. MedRxiv [Preprint]. 2021.
298. Corchado-Garcia J, Puyraimond-Zemmour D, Hughes T, Cristea-Platon T, Lenehan P, Pawlowski C, et al. Real-world effectiveness of Ad26.COV2.S adenoviral vector vaccine for COVID-19. MedRxiv [Preprint]. 2021.
299. Barlow RS, Jian K, Larson L. Effectiveness of COVID-19 Vaccines Against SARS-CoV-2 Infection During a Delta Variant Epidemic Surge in Multnomah County, Oregon, July 2021. MedRxiv [Preprint]. 2021.
300. Polinski JM, Weckstein AR, Batech M, Kabelac C, Kamath T, Harvey R, et al. Effectiveness of the Single-Dose Ad26.COV2.S COVID Vaccine. MedRxiv [Preprint]. 2021.
301. Corchado-Garcia J, Zemmour D, Hughes T, Bandi H, Cristea-Platon T, Lenehan P, et al. Analysis of the Effectiveness of the Ad26.COV2.S Adenoviral Vector Vaccine for Preventing COVID-19. JAMA Netw Open. 2021;4(11):e2132540.
302. Chin ET, Leidner D, Zhang Y, Long E, Prince L, Li Y, et al. Effectiveness of the mRNA-1273 Vaccine during a SARS-CoV-2 Delta Outbreak in a Prison. N Engl J Med. 2021;385(24):2300-1.
303. Gupta K, O'Brien WJ, Bellino P, Linsenmeyer K, Doshi SJ, Sprague RS, et al. Incidence of SARS-CoV-2 Infection in Health Care Workers After a Single Dose of mRNA-1273 Vaccine. JAMA Netw Open. 2021;4(6):e2116416.
304. Chemaitelly H, Yassine HM, Benslimane FM, Al Khatib HA, Tang P, Hasan MR, et al. mRNA-1273 COVID-19 vaccine effectiveness against the B.1.1.7 and B.1.351 variants and severe COVID-19 disease in Qatar. Nat Med. 2021;27(9):1614-21.
305. Herlihy R, Bamberg W, Burakoff A, Alden N, Severson R, Bush E, et al. Rapid Increase in Circulation of the SARS-CoV-2 B.1.617.2 (Delta) Variant - Mesa County, Colorado, April-June 2021. MMWR Morb Mortal Wkly Rep. 2021;70(32):1084-7.
306. Bruxvoort KJ, Sy LS, Qian L, Ackerson BK, Luo Y, Lee GS, et al. Real-world effectiveness of the mRNA-1273 vaccine against COVID-19: Interim results from a prospective observational cohort study. Lancet Reg Health Am. 2021:100134.
307. Bruxvoort KJ, Sy LS, Qian L, Ackerson BK, Luo Y, Lee GS, et al. Effectiveness of mRNA-1273 against delta, mu, and other emerging variants of SARS-CoV-2: test negative case-control study. BMJ. 2021;375:e068848.
308. El Sahly HM, Baden LR, Essink B, Doblecki-Lewis S, Martin JM, Anderson EJ, et al. Efficacy of the mRNA-1273 SARS-CoV-2 Vaccine at Completion of Blinded Phase. N Engl J Med. 2021;385(19):1774-85.
309. Li XN, Huang Y, Wang W, Jing QL, Zhang CH, Qin PZ, et al. Effectiveness of inactivated SARS-CoV-2 vaccines against the Delta variant infection in Guangzhou: a test-negative case-control real-world study. Emerg Microbes Infect. 2021;10(1):1751-9.
310. Min Kang, Yao Yi, Yan Li, Limei Sun, Aiping Deng, Ting Hu, et al. Effectiveness of Inactivated COVID-19 Vaccines Against COVID-19 Pneumonia and Severe Illness Caused by the B.1.617.2 (Delta) Variant: Evidence from an Outbreak in Guangdong, China. SSRN [Preprint]. 2021.



- 1  
2  
3  
4  
5  
6  
7  
8  
9  
10  
11  
12  
13  
14  
15  
16  
17  
18  
19  
20  
21  
22  
23  
24  
25  
26  
27  
28  
29  
30  
31  
32  
33  
34  
35  
36  
37  
38  
39  
40  
41  
42  
43  
44  
45  
46  
47  
48  
49  
50  
51  
52  
53  
54  
55  
56  
57  
58  
59  
60
311. Silva-Valencia Javier, Soto-Becerra Percy, Escobar-Agreda Stefan, Fernández-Navarro Manuel, Moscoso-Porras Miguel, Solari Lely, et al. Effectiveness of the BBIPB-CorV Vaccine in Preventing Infection and Death in Health Care Workers in Peru 2021. SSRN [Preprint]. 2021.
  312. Al Kaabi N, Zhang Y, Xia S, Yang Y, Al Qahtani MM, Abdulrazzaq N, et al. Effect of 2 Inactivated SARS-CoV-2 Vaccines on Symptomatic COVID-19 Infection in Adults: A Randomized Clinical Trial. *JAMA*. 2021;326(1):35-45.
  313. Farida Ismail AlHosani, Anderson Eduardo Stanciole, Bashir Aden, Andrey Timoshkin, Omar Najim, Walid Abbas Zaher, et al. Sinopharm's BBIBP-CorV vaccine effectiveness on preventing hospital admission and deaths: results from a retrospective study in the Emirate of Abu Dhabi, United Arab Emirates (UAE). SSRN [Preprint]. 2021.
  314. AlQahtani M, Bhattacharyya S, Alawadi A, Mahmeed HA, Sayed JA, Justman J, et al. Morbidity and mortality from COVID-19 postvaccination breakthrough infections in association with vaccines and the emergence of variants in Bahrain. *Research Square* [Preprint]. 2021.
  315. Jara A, Undurraga EA, Gonzalez C, Paredes F, Fontecilla T, Jara G, et al. Effectiveness of an Inactivated SARS-CoV-2 Vaccine in Chile. *N Engl J Med*. 2021;385(10):875-84.
  316. Ranzani OT, Hitchings MDT, Dorion M, D'Agostini TL, de Paula RC, de Paula OFP, et al. Effectiveness of the CoronaVac vaccine in older adults during a gamma variant associated epidemic of covid-19 in Brazil: test negative case-control study. *BMJ*. 2021;374:n2015.
  317. Hitchings MDT, Ranzani OT, Torres MSS, de Oliveira SB, Almiron M, Said R, et al. Effectiveness of CoronaVac among healthcare workers in the setting of high SARS-CoV-2 Gamma variant transmission in Manaus, Brazil: A test-negative case-control study. *Lancet Reg Health Am*. 2021;1:100025.
  318. Enny S. Paixao, Kerry LM Wong, Flavia Jôse Oliveira Alves, Vinicius de Araújo Oliveira, Thiago Cerqueira-Silva, Juracy Bertoldo Júnior, et al. Effectiveness of the CoronaVac vaccine in prevention of symptomatic and progression to severe Covid-19 in pregnant women in Brazil. SSRN [Preprint]. 2021.
  319. Hitchings MDT, Ranzani OT, Scaramuzzini Torres MS, de Oliveira SB, Almiron M, Said R, et al. Effectiveness of CoronaVac in the setting of high SARS-CoV-2 P.1 variant transmission in Brazil: A test-negative case-control study. *MedRxiv* [Preprint]. 2021.
  320. Tanriover MD, Doganay HL, Akova M, Guner HR, Azap A, Akhan S, et al. Efficacy and safety of an inactivated whole-virion SARS-CoV-2 vaccine (CoronaVac): interim results of a double-blind, randomised, placebo-controlled, phase 3 trial in Turkey. *Lancet*. 2021;398(10296):213-22.
  321. Palacios R, Batista AP, Albuquerque CSN, Patiño EG, Santos JdP, Tilli Reis Pessoa Conde M, et al. Efficacy and Safety of a COVID-19 Inactivated Vaccine in Healthcare Professionals in Brazil: The PROFISCOV Study. SSRN [Preprint]. 2021.
  322. Ella R, Reddy S, Blackwelder W, Potdar V, Yadav P, Sarangi V, et al. Efficacy, safety, and lot-to-lot immunogenicity of an inactivated SARS-CoV-2 vaccine (BBV152): interim results of a randomised, double-blind, controlled, phase 3 trial. *Lancet*. 2021;398(10317):2173-84.
  323. Desai D, Khan AR, Soneja M, Mittal A, Naik S, Kodan P, et al. Effectiveness of an inactivated virus-based SARS-CoV-2 vaccine, BBV152, in India: a test-negative, case-control study. *Lancet Infect Dis*. 2021.
  324. Malhotra S, Mani K, Lodha R, Bakhshi S, Mathur VP, Gupta P, et al. SARS-CoV-2 Reinfection Rate and Estimated Effectiveness of the Inactivated Whole Virion Vaccine BBV152 Against Reinfection Among Health Care Workers in New Delhi, India. *JAMA Netw Open*. 2022;5(1):e2142210.

- 1  
2  
3 325. Heath PT, Galiza EP, Baxter DN, Boffito M, Browne D, Burns F, et al. Safety and Efficacy  
4 of NVX-CoV2373 Covid-19 Vaccine. *N Engl J Med*. 2021;385(13):1172-83.  
5  
6 326. Dunkle LM, Kotloff KL, Gay CL, Anez G, Adelglass JM, Barrat Hernandez AQ, et al.  
7 Efficacy and Safety of NVX-CoV2373 in Adults in the United States and Mexico. *N Engl J Med*.  
8 2021.  
9  
10 327. Toback S, Galiza E, Cosgrove C, Galloway J, Goodman AL, Swift PA, et al. Safety,  
11 immunogenicity, and efficacy of a COVID-19 vaccine (NVX-CoV2373) co-administered with  
12 seasonal influenza vaccines: an exploratory substudy of a randomised, observer-blinded,  
13 placebo-controlled, phase 3 trial. *Lancet Respir Med*. 2021.  
14  
15 328. Shinde V, Bhikha S, Hoosain Z, Archary M, Borat Q, Fairlie L, et al. Efficacy of NVX-  
16 CoV2373 Covid-19 Vaccine against the B.1.351 Variant. *N Engl J Med*. 2021;384(20):1899-909.  
17  
18  
19  
20  
21  
22  
23  
24  
25  
26  
27  
28  
29  
30  
31  
32  
33  
34  
35  
36  
37  
38  
39  
40  
41  
42  
43  
44  
45  
46  
47  
48  
49  
50  
51  
52  
53  
54  
55  
56  
57  
58  
59  
60

1  
2  
3 **COVID-19: Virology, variants, and vaccinations**  
4

5  
6 **Keywords:** Covid-19, Coronavirus, Virology, SARS-CoV-2 variants, Vaccines.  
7

8 **Megan Young<sup>1†</sup>, Harry Crook<sup>1†</sup>, Janet Scott<sup>2</sup>, Paul Edison<sup>1,3,\*</sup>**  
9

10  
11 <sup>1</sup> Faculty of Medicine, Imperial College London, London, UK.

12 <sup>2</sup> Medical Research Council-University of Glasgow Centre for Virus Research, University of Glasgow,  
13 UK

14 <sup>3</sup> School of Medicine, Cardiff University, Cardiff, UK.  
15

16  
17 † Both authors contributed equally to the manuscript  
18

19  
20 \*Corresponding author:

21 Dr Paul Edison, MD, MRCP, PhD, FRCP, FRCPI,

22 Clinical Senior Lecturer and Professor,

23 Clinical Senior Lecturer, Imperial College London and Honorary Professor, Cardiff University, UK

24 Division of Neurology, Faculty of Medicine, Imperial College London

25 Level 2, Commonwealth Building,

26 Hammersmith Campus, Imperial College London,

27 Du Cane Road, London, W12 0NN, UK  
28  
29

30  
31 Tel: +442075941081

32 E-mail: paul.edison@imperial.ac.uk  
33  
34  
35

36 No authors have any competing interests.  
37  
38  
39  
40  
41  
42  
43  
44  
45  
46  
47  
48  
49  
50  
51  
52  
53  
54  
55  
56  
57  
58  
59  
60

## **Abstract**

As of 25th January 2022, there have been over 349 million confirmed cases of COVID-19, with over 5.59 million confirmed deaths associated with the SARS-CoV-2 virus. The COVID-19 pandemic has prompted an extensive, global effort to study the molecular evolution of the virus and develop vaccines to combat its spread. Although rigorous determination of SARS-CoV-2 infectivity remains elusive, due to the continuous evolution of the virus, steps have been made to understand its genome, structure, and emerging genetic mutations. The SARS-CoV-2 genome is composed of a number of open reading frames (ORFs) and structural proteins, including the spike protein, which is essential for entry into host cells. As of 25th January 2022, the WHO reports five variants of concern (VOC) two variants of interest (VOI) and three variants under monitoring (VUM). The mutations harboured in these variants confer an increased transmissibility, severity of disease, and escape from neutralising antibodies compared to the primary strain. The current vaccine strategy, including booster doses, provides protection from severe disease. As of 24th January 2022, there are 33 approved vaccines in use in 197 countries. In this review, we discuss the genetics, structure and transmission methods of SARS-CoV-2 and its variants, highlighting how mutations provide enhanced abilities to spread and inflict disease. We also outline the vaccines currently in use around the world, providing evidence for the immunogenicity and effectiveness of each.

## **1. Introduction**

There are seven coronaviruses that infect humans, all belonging to either alpha- or beta-coronavirus subgroups, including 229E (alpha), NL63 (alpha), OC43 (beta), and HKU1 (beta)(1). Over the last two decades, three notable beta-coronaviruses, severe acute respiratory syndrome coronavirus (SARS-CoV) in 2002, Middle East respiratory syndrome coronavirus (MERS-CoV) in 2011, and most recently, severe acute respiratory syndrome 2 (SARS-CoV-2) in 2019, have emerged and caused severe illness resulting in debilitating disease and worldwide fatalities. SARS-CoV-2 is the pathogen responsible for the current Coronavirus 2019 (COVID-19) pandemic and has caused more than 5.59 million deaths in approximately two years and resulted in multisystem illness in several million people(2).

All viruses change and mutate over time, with most changes having little to no impact. However, some mutations may alter its pathogenic or transmission potential and could, therefore, increase disease severity or hinder the effectiveness of vaccines and therapeutic strategies. The World Health Organisation (WHO) classify SARS-CoV-2 variants that increase transmissibility, disease severity or virulence, or decrease the effectiveness of public health measures, diagnostics, therapeutics, or vaccines as variants of concern (VOC). Variants with genetic changes that are predicted to enhance the virulence and transmissibility of the virus which have been identified to cause community transmission in multiple countries posing a possible risk to global public health are defined as variants of interest (VOI). Lastly, the WHO defines variants with genetic changes that are suspected to affect virus characteristics and have currently unclear phenotypic or epidemiological effects as variants under monitoring (VUM). VUM are not typically assigned a name until they are upgraded to VOI or VOC. The full working definitions of VOC, VOI and VUM can be found on the WHO 'tracking SARS-CoV-2 variants' website: [www.who.int/en/activities/tracking-SARS-CoV-2-variants/](http://www.who.int/en/activities/tracking-SARS-CoV-2-variants/)(3). As of 25th January 2022, the WHO reports five VOC; Alpha, Beta, Gamma, Delta and Omicron, two VOI; Lambda and Mu, and three VUM(3). Former VOC/VOI/VUM have been reclassified as 'formerly monitored variants' due to them either no longer circulating, having little impact on the epidemiological situation, or having no concerning properties(3). Since the beginning of the COVID-19 pandemic, the rapid

1  
2  
3 development of effective COVID-19 vaccines has taken place around the world. As of 24<sup>th</sup> January  
4 2022, there are 33 approved vaccines in use in 197 countries, with ten vaccines having gained  
5 emergency use listing approval from the WHO(4).  
6

7 In this review, we provide an overview of the genome and structure of SARS-CoV-2, describing  
8 how these elements allow the virus to infect and replicate inside of host cells, before outlining how  
9 certain mutations harboured by SARS-CoV-2 variants enhance these abilities. Next, we examine the  
10 current state of vaccine development around the world and provide evidence of the effectiveness of  
11 booster doses.  
12  
13

## 14 **2. Methods**

15 We searched PubMed and Embase databases for COVID-19-related articles published  
16 between 1<sup>st</sup> January 2020 and 25<sup>th</sup> January 2022 and for general coronavirus-related articles published  
17 from 1<sup>st</sup> January 2000 onwards. Our search terms included SARS-CoV-2, COVID-19, and specific terms  
18 including virology, genome, variants, and vaccine. Additional, specific search terms are outlined in  
19 supplementary file 1. We performed further manual searching for additional articles and data using  
20 relevant databases, including who.int, gov.uk, and ecdc.europa.eu/en. Due to the rapidly evolving  
21 nature of the literature involving SARS-CoV-2, we also searched preprint databases including MedRxiv  
22 and BioRxiv. Due to the various topics addressed here, studies were selected through different criteria,  
23 details of which can be found in supplementary file 1. Overall, studies were selected based on quality  
24 and journal reputation, with real-world studies with large sample sizes of greatest interest.  
25  
26  
27  
28  
29

## 30 **3. Viral transmission, clinical presentation, and genetic susceptibility of COVID-19**

31 SARS-CoV-2 is predominantly spread via respiratory droplet transmission, spreading between  
32 people through close contact, coughing, or sneezing. It has been documented that the virus can also  
33 spread through airborne transmission, fomite transmission, and via other modes, such as through  
34 biological material including urine and faeces, and through (5, 6). The SARS-CoV-2 virus may survive  
35 on surfaces or suspended in air droplets for some time. Indeed, on plastic, stainless steel, and glass  
36 surfaces, the half-life of the virus is around 5.3, 4.4, and 4.2 hours, respectively(7), with no difference  
37 seen between SARS-CoV-2 variants(8). Although SARS-CoV-2 can be detected on inanimate surfaces  
38 for hours and days, due to the evaporation of water droplets, the viruses' living environment, the  
39 concentration of the virus plummets rapidly(9). Protective measures, including using personal  
40 protective equipment (PPE), maintaining indoor ventilation, and disinfecting hands and surfaces, can  
41 effectively limit the spread of SARS-CoV-2(10).  
42  
43  
44  
45

46 Once inside the airways, SARS-CoV-2 can directly or indirectly infect ciliated, mucus-secreting,  
47 and club cells of bronchial epithelium, type 1 pneumocytes within the lungs, and the conjunctival  
48 mucosa(11). The clinical presentation of COVID-19 is non-specific, heterogeneous, and infection can  
49 result in a wide spectrum of symptoms. Following an incubation period of 4-14 days, symptoms  
50 develop ranging from mild to severe disease and, in some cases, can result in death(12). The most  
51 common COVID-19 symptoms include fever, cough, dyspnoea, and fatigue(13, 14), while myalgia,  
52 gastrointestinal issues, cognitive deficits, and other symptoms are reported. Asymptomatic individuals  
53 can also test positive for COVID-19(15, 16). Although the entire population is susceptible to COVID-19  
54 infection, some subgroups within the general population exist that are more susceptible to developing  
55 poorer clinical outcomes.  
56  
57

58 Risk factors associated with increased risk of hospitalisation, severe disease, and fatal  
59 outcome with COVID-19 have been identified. Older age(17-19), male sex(20, 21), non-white  
60

1  
2  
3 ethnicity(21, 22), comorbidities including diabetes, hypertension, and lung disease(18, 23-25),  
4 malignancy and immunodeficiency(26-28) have all been associated with more severe COVID-19. The  
5 duration of symptoms endured by COVID-19 patients, as well as the treatment they receive will also  
6 have profound influences on the severity of disease they experience and both the acute and long-term  
7 outcomes following recovery. The host genetic background is thought to have an influence on the  
8 susceptibility and severity of COVID-19, possibly explaining the broad spectrum of clinical  
9 manifestations that can develop in seemingly similar individuals. A study examining individuals with  
10 COVID-19 across numerous ancestry groups identified four gene loci associated with susceptibility to  
11 COVID-19; SLC6A20, RPL24, ABO, PLEKHA4, and nine associated with increased risk of severe COVID-  
12 19; LZTFL1, FOXP4, TMEM65, OAS1, KANSL1, TAC4 , DPP9, RAVR1, and IFNAR2(29). Meanwhile,  
13 genome-wide association studies spanning across Europe, the United States (US), and the United  
14 Kingdom (UK) identified a gene cluster on chromosome three (chr3p21.31) as being strongly linked  
15 with susceptibility and severity of COVID-19(30, 31). Polymorphisms in the angiotensin-converting  
16 enzyme 2 (ACE2) receptor and transmembrane protease serine 2 (TMPRSS2) have also been shown to  
17 enhance SARS-CoV-2 viral entry(32, 33), with differential polymorphisms seen across ethnic  
18 populations, which may partly explain why certain ethnic groups are more susceptible to severe  
19 COVID-19. Increased ACE2 receptor levels have also been associated with other risk factors of COVID-  
20 19 including smoking and increasing age(34). The utilisation of polygenetic risk scores (PRS) may be  
21 useful in determining an individual's risk for developing severe disease caused by COVID-19(35). A PRS  
22 infers a person's risk of susceptibility to, or development of a certain disease based on the total  
23 number of genomic variations they possess. Determining PRS with the inclusion of comorbidities, such  
24 as chronic obstructive pulmonary disease(36), or other aspects, such as coagulation factors(37), may  
25 improve the usefulness of PRS in determining a person's risk of severe COVID-19.  
26  
27  
28  
29  
30  
31  
32  
33

#### 34 **4. Virology of SARS-CoV-2**

35 SARS-CoV-2 is a positive-stranded ribonucleic acid (RNA) virus belonging to Coronaviridae  
36 family. Coronaviruses, which have crownlike appearances, are the largest known RNA viruses and are  
37 thought to primarily infect vertebrates(38, 39). SARS-CoV-2 belongs to the beta genus of the  
38 coronaviruses and has a genome varying from 29.8kb to 29.9kb in size(40). Human coronaviruses  
39 (HCoV) genomes consist of a variable number of open reading frames (ORFs). Following the typical 5'-  
40 3' order, the beginning two-thirds of the SARS-CoV-2 genome contains two ORFs, ORF1a and ORF1b  
41 which, inside the host cell, are translated at the rough endoplasmic reticulum into polyprotein 1a  
42 (pp1a) and polyprotein 1ab (pp1ab), respectively(40). These polyproteins are cleaved into 16 non-  
43 structural proteins (nsp); nsp1-11, from pp1a and nsp12-16, from pp1ab. The proteolytic release of  
44 nsp1 occurs rapidly, which enables it to interfere with translation processes of the host cell by inducing  
45 cellular mRNA degradation(41-43). Nsp2-16 contain the viruses' replication and transcription complex  
46 (RTC) and encode multiple enzymes with many functions including, proteases, helicase, polymerase,  
47 exo- and endo-nuclease, N7- and 2'O-methyltransferases, and de-ubiquitination enzymes(44, 45). The  
48 final third of HCoV genomes contain genes that encode structural and accessory proteins. The four  
49 major structural proteins encoded here are the nucleocapsid (N), membrane (M), envelope (E), and  
50 spike glycoprotein (S) proteins(46, 47). The N protein is associated with the viral RNA genome and is  
51 involved in RNA synthesis regulation and interacts with the M protein during viral budding(39, 48).  
52 The M protein is important for viral assembly, it contains a short N-terminal domain that projects onto  
53 the external surface of the envelope and a long internal C terminus(39). The E protein function is  
54 largely unknown; however, along with the N and M proteins, it is required for viral assembly and  
55  
56  
57  
58  
59  
60

1  
2  
3 release(47) . Lastly, the S protein gives coronaviruses their characteristic spikes that compose their  
4 crownlike appearance. This protein projects through the viral envelope, is heavily glycosylated, and  
5 regulates host cell membrane receptor binding and fusion of the viral and cellular membrane(49). The  
6 functions of the eleven accessory proteins encoded within the one-third closest to the 3' end of the  
7 SARS-CoV-2 genome are not fully understood. These accessory proteins are encoded by the ORF3a,  
8 ORF3b, ORF3c, ORF3d, ORF6, ORF7a, ORF7b, ORF8, ORF9b, ORF9c, and ORF10 genes. Some of these  
9 proteins, including ORF3b, ORF6, ORF7a and ORF8 are interferon antagonists which impair the host  
10 cell immune response(50-53), while ORF3a may promote virus release(54) and is involved in apoptosis  
11 of host cells through caspase-3 activation(55). ORF9b and ORF9c are known to suppress the host  
12 antiviral response by interacting with host cell organelles(56-58), while a clear understanding of the  
13 functions of ORF3c, ORF7b, and ORF10 remains elusive(59). **Figure 1** (A and B) depicts the genome  
14 and structure of SARS-CoV-2.

15  
16  
17  
18  
19  
20  
21  
22  
23  
24  
25  
26  
27  
28  
29  
30  
31  
32  
33  
34  
35  
36  
37  
38  
39  
40  
41  
42  
43  
44  
45  
46  
47  
48  
49  
50  
51  
52  
53  
54  
55  
56  
57  
58  
59  
60  
The S glycoprotein is composed of two functionally distinct subunits (S1 and S2) and is essential for viral entry into host cells. The N-terminal S1 domain of the protein contains the receptor-binding domain (RBD) that directly interacts with the ACE2 receptor on the host cell, the primary receptor that SARS-Cov-2 utilises for cell entry(60). The C-terminal S2 domain fuses the host and viral membranes to allow for entry of the viral genome into the host cell(61). The subunits of the trimeric S complex are either in a closed (pre-fusion stage) or open (post-fusion stage) conformation(62), with one subunit always in an open conformation to allow for ACE2 recognition and binding(63). The RBD itself consists of five anti-parallel  $\beta$ -strands surrounded by several  $\alpha$ -helices(64). From closed to open conformation, the RBD undergoes structural rearrangement whereby the globular head region rotates clockwise, which alters its electropotential surface(64). Once positioned, numerous residues within the RBD form either hydrogen bonds or salt bridges with residues of the ACE2 receptor, allowing for tight binding(65), while the concave structure of the RBD allows for three distinct binding regions(64). Following binding between the S protein and the host cell receptor, host cell proteases cleave the S protein, causing the release of the S2 domain which allows for fusion and cell entry(66). **Figure 1** (C and D) demonstrate the structure and function of the S protein.

The ACE2 receptor is expressed in numerous cell types throughout the human body, including in the lungs, oral and nasal mucosa, heart, gastrointestinal tract, kidneys, liver, spleen, and brain(67), highlighting the widespread infection that SARS-CoV-2 can inflict. Meanwhile, TMPRSS2, a host cell protease, facilitates fusion of the viral and host cell membranes(68), and may play a role in the spread of the virus in the airways(68). Host cell cathepsin L may also aid in SARS-CoV-2 cell entry by cleaving the S protein(69). Indeed, a clinically approved protease inhibitor has been shown to block SARS-CoV-2 cell entry(70). **Figure 2** depicts the mechanism by which SARS-CoV-2 gains entry into and replicates inside host cells, and overviews the host cell immune response.

## 5. Variants of SARS-CoV-2

Most viral mutations have a limited impact on the viruses' ability to infect, replicate, escape host immunity, and transmit, however, certain mutations may give a viral strain a competitive advantage and, through natural selection, give it the ability to become dominant. Many of the mutations observed in SARS-CoV-2 variants are found within the RBD or the N-terminal domain of the S protein, which alters the three-dimensional structure of the S protein. Not only can these changes affect the transmission abilities of the virus but can also allow it to better escape the immune response, including from neutralising antibodies either elicited through vaccine administration or natural infection. The SARS-CoV-2 virus has mutated numerous times, with estimates suggesting that



1  
2  
3 circulating lineages acquire nucleotide mutations at rates of around one to two mutations per  
4 month(71). The current method of identifying variants relies on the use of genomic testing such as  
5 whole genome sequencing, partial S-gene sequencing, or nucleic acid amplification technique (NAAT)-  
6 based assays(72). The aspects of different variants that most people experience, however, is the  
7 clinical symptoms they inflict. Certain variants induce a greater risk of severe disease and death, such  
8 as Alpha and Delta(73), while others are more likely to induce milder symptoms, such as Omicron(74,  
9 75). Moreover, individual symptoms can differ between variants. For example, the Gamma variant is  
10 associated inflicting anosmia and dysgeusia(76), which is less commonly seen in Omicron infections.  
11 Moving forward, the clinical themes and symptoms associated with emerging variants should be  
12 elucidated rapidly in order for the public and healthcare professionals to rapidly identify possible cases  
13 of COVID-19.  
14

15  
16  
17 The WHO have tracked and monitored SARS-CoV-2 variants since the COVID-19 pandemic  
18 began to identify VOCs. As of 25<sup>th</sup> January 2022, the WHO reports five VOC, two VOI, and three VUM(3)  
19 (Table 1). Herein, we report studies that compare SARS-CoV-2 variants to the 'primary' virus strain.  
20 'Primary strain' refers to the strain of the virus that first emerged in Wuhan, China at the end of 2019  
21 and spread around the world in the first wave of infections, which is often also referred to as the  
22 Wuhan-Hu-1, B.1, or wild-type strain.  
23  
24

## 25 26 27 **5.1 Variants of concern**

### 28 **5.1.1 Alpha**

29 The Alpha SARS-CoV-2 variant, of the B.1.1.7 lineage, was first documented in the UK  
30 in September 2020 and classified as a VOC on 18<sup>th</sup> December 2020(3, 77). This variant contains S  
31 protein mutations which have potential biological effects. Firstly, the S protein residue 501, a key  
32 contact residue within the RBD, forms a portion of the binding loop in the contact region of the ACE2  
33 receptor, forms a hydrogen bond with the Y41 residue of the ACE2 receptor, and stabilises the ACE2  
34 K353 residue(65, 78, 79). Alpha harbours an N501Y mutation which increases the binding affinity of  
35 the RBD to the ACE2 receptor(80). Next, the P681H mutation contained within the Alpha variant is  
36 located immediately adjacent to the 682-685 furin cleavage site, at the interface of the S1 and S2  
37 domains(81). The S1/S2 furin cleavage site prompts entry into respiratory epithelial cells and partly  
38 determines the transmissibility of the virus(82-84), while the P681H mutation makes the furin  
39 cleavage site less acidic, meaning it is more effectively recognised and cleaved(85, 86). Alpha also  
40 contains a D614G mutation, located within the S1/S2 furin cleavage site, which increases SARS-CoV-2  
41 binding affinity to the ACE2 receptor and increases infectivity(87). Other mutations harboured within  
42 the Alpha variant enhance the ability of the virus to escape antibody detection, such as the two amino  
43 acid deletion at the sites 69-70 in the N-terminal domain of the S protein(88, 89), while other  
44 mutations demonstrate limited or no effects(90). In February 2021, viruses of the B.1.1.7 lineage with  
45 the added S protein mutation E484K were identified, which may have threatened vaccine  
46 effectiveness due to the mutation conferring an increased resistance to neutralising vaccine-elicited  
47 and monoclonal antibodies(91). This mutation had limited effects, however, and variants containing  
48 it failed to dominate.  
49

50  
51  
52 Epidemiological studies explored the Alpha variant, with a study in Madrid, Spain finding that  
53 the probability of admission to an intensive care unit (ICU) was twice as high in patients infected with  
54 the Alpha variant compared to those infected with the primary strain, while this variant became the  
55 dominant strain within four months, and led to an increase in disease burden as a result(92).  
56 Meanwhile in Cannes, France, infection with the Alpha variant was associated with a 3.8-fold higher  
57  
58  
59  
60



1  
2  
3 risk of transfer to an ICU or death compared to the primary strain(93). During the third COVID-19 wave  
4 in Ontario, Canada, where 91% of infections were caused by the Alpha variant, the risk of both  
5 hospitalisation (adjusted odds ratio (aOR)=1.57) and death (aOR=1.52) was higher compared to  
6 primary strain infections(94). Overall, the Alpha variant was approximately 50-70% more transmissible  
7 and was associated with a 30-60% increased risk of hospitalisation and death compared to the primary  
8 strain(95-100).  
9

10  
11 The Alpha variant was found to have a minimal impact on the effectiveness of current  
12 vaccines(101, 102), while the risk of reinfection remained similar for this variant as with previous  
13 ones(103). On 3<sup>rd</sup> September 2021, the European Centre for Disease Prevention and Control (ECDC)  
14 reclassified the Alpha, and the Alpha+E484K mutation variants from a VOC to a 'de-escalated variant'  
15 (104).  
16  
17

### 18 **5.1.2 Beta**

19  
20 The Beta SARS-CoV-2 variant, of the B.1.351 lineage, was first documented in South Africa in  
21 May 2020(3). This variant contains five S protein mutations of interest: N501Y, E484K, D614G, K417N,  
22 and A701V. Like the Alpha variant, Beta contains the mutations N501Y, E484K, and D614G, which  
23 increase ACE2 receptor binding affinity(80, 87), increase virulence(105), and enhance resistance to  
24 neutralising antibodies(91, 106). The K417 residue of the SARS-CoV-2 S protein interacts with the D30  
25 residue of the ACE2 receptor, forming a salt bridge across the central contact region(65, 78), however,  
26 the K417N mutation appears to have a limited impact on ACE2 receptor binding(80). The A701V  
27 mutation is located close to the furin cleavage site but has a minimal impact on transmissibility or  
28 antibody resistance(101).  
29

30  
31 In a genomic and epidemiological study, it was concluded that the Beta SARS-CoV-2 variant  
32 had a selective advantage over previous variants from its increased transmissibility and immune  
33 escape abilities(107, 108), while the E484K/N501K mutations significantly enhanced the binding  
34 affinity of Beta and, hence, increased its transmissibility(109). A retrospective cohort study found that  
35 infection with the Beta variant was associated with an increased hospitalisation risk compared to an  
36 infection with a non-VOC (hazard ratio (HR)=2.30)(100). Overall, Beta is approximately 25-50% more  
37 transmissible, is associated with a possible increase in risk of hospital mortality, and has enhanced  
38 resistance to antibody neutralisation compared to previous variants(107, 108, 110).  
39  
40  
41  
42

### 43 **5.1.3 Gamma**

44  
45 The Gamma variant is of the P.1 lineage and was first reported in November 2020 from  
46 travellers returning to Japan from Brazil, and was later discovered in Brazil(3, 111). This variant  
47 contains the S protein mutations of interest; K417T, E484K, N501Y, D614G, and H655Y(104). As  
48 mentioned, the N501Y and D614G mutations increase ACE2 receptor binding affinity and increase  
49 infectivity of the virus(80, 87). The N501Y, K417N/T, and E484K mutation trinity, meanwhile, is shared  
50 by both Gamma and Beta variants, and is associated with enhanced infectivity and lethality compared  
51 to the N501Y mutation alone, possibly due to tighter binding of the S protein to the ACE2 receptor  
52 due to increased electrostatic contribution(112). Gamma also possesses the H655Y mutation which  
53 was found to provide enhanced viral escape abilities from multiple human monoclonal antibodies *in*  
54 *vitro*(113).  
55  
56

57  
58 The Gamma variant is associated with heightened transmissibility(109, 110, 114), with one  
59 study concluding that it possesses a 1.7- to 2.4-fold increased transmissibility compared to previous  
60 variants(115). Additionally, the wave of infections caused by the Gamma variant in Brazil was

1  
2  
3 associated with a 13% increase in death rate compared to the previous wave, suggesting the greater  
4 virulence held by Gamma compared to previous viral strains(116). A surveillance study from seven  
5 European countries concluded that the Gamma variant was associated with a higher risk of  
6 hospitalisation (aOR=2.6) and admission to an ICU (aOR=2.2) when compared to non-VOC cases(117).  
7 In Manaus, Brazil the resurgence of COVID-19, despite high seroprevalence, suggested that the  
8 Gamma variant had a moderate resistance to neutralising antibodies(118), however, Gamma has been  
9 shown to be significantly less resistant to neutralising antibodies, compared to other variants,  
10 including Beta(119).  
11  
12  
13  
14

#### 15 **5.1.4 Delta**

16 The Delta variant, from the B.1.617.2 lineage, was first documented in India in October 2020  
17 and was classified as a VOC on 11<sup>th</sup> May 2021(3). Of the S protein mutations of interest, the  
18 aforementioned P681H and D614G are also harboured by the Delta variant(104) and similarly impacts  
19 its ACE2 receptor binding affinity and transmissibility(106, 120, 121). Unlike the E484K mutation seen  
20 in previous variants, Delta contains the E484Q mutation which, along with a L452R mutation also  
21 located within the RBD, causes significantly higher affinity for the ACE2 receptor than the primary  
22 strain or the E484K mutation alone(122). The L452R mutation alone results in greater RBD-ACE2  
23 receptor binding affinity and enhanced escape from neutralising antibodies(123, 124). Lastly, the Delta  
24 variant contains the T478K mutation, located on the interface between the S protein and the ACE2  
25 receptor when bound, which increases the electrostatic potential of the S protein and enhances  
26 binding affinity(125).  
27  
28  
29

30 The Delta variant quickly became the dominant variant in the UK(126), US(127), Europe, and  
31 around the world(128). The mutations present in the Delta variant, enhanced the transmissibility of  
32 the virus as a result of increased binding affinity to the ACE2 receptor(109). **It was estimated that the  
33 reproduction number of the Delta variant is 97% greater than non-VOC/VOI and approximately three  
34 times that of the Alpha, Beta, and Gamma variants**(110), which highlights the competitive advantage  
35 that this variant had over earlier ones and how it rapidly became the dominant strain globally. **The  
36 fast replication rate of Delta likely contributes to its increased transmissibility compared to Alpha,  
37 Beta, and Gamma**. From infected individuals, the Delta variant has been able to be detected by  
38 polymerase chain reaction (PCR) within the first four days from exposure, while non-Delta infections  
39 could only be detected after six days(129). Furthermore, viral loads of people infected with the Delta  
40 variant were found to be significantly higher than people infected with other strains(129), including  
41 Beta(130). Delta is also thought to better escape neutralisation, with the frequency of post-vaccination  
42 infections much higher for the Delta variant than infections with the primary strain in India(131) and  
43 blood sera samples from individuals who had received one dose of a COVID-19 vaccine showing  
44 minimal neutralisation of the Delta variant(132).  
45  
46  
47  
48  
49

50 The Delta variant is also associated with an increased disease severity. In Scotland, infection  
51 with the Delta variant was associated with an increased risk of hospitalisation (HR=1.85) compared to  
52 infection with the Alpha variant(133). Compared to non-VOC infections, North American studies  
53 demonstrated that infection with Delta was associated with a 108%(134) or HR=2.3(100) increased  
54 risk of hospitalisation, a 234% increased risk for admission to an ICU, and a 132% increased risk of  
55 death(134). Lastly, a study in India found that the risk of death was around 1.8 times higher for Delta  
56 infections, while Delta also infected and induced symptoms in a greater proportion of younger people  
57 (0-19 years old), compared to the primary strain(131).  
58  
59  
60

### 5.1.5 Omicron

The Omicron variant is of the B.1.1.529 lineage and was first discovered in November 2021 in South Africa and Botswana before being detected in multiple countries and classified as a VOC on 26<sup>th</sup> November 2021(3). This variant contains over 30 S protein mutations(104), 23 of which have been previously identified, including K417N, T478K, E484A, D614G, H655Y, P681H, and N501Y(135). 15 Omicron mutations are contained within the RBD(17) providing the variant with a significantly enhanced binding affinity to the ACE2 receptor(135, 136). In addition, various single mutations harboured with the RBD of the Omicron variant impair the effectiveness of neutralising antibodies, including K417N, N440K, G446S, E484A, Q493K, G496S, G339D, S371L, and S375F(17).

The emergence of Omicron has been followed by a tidal wave of infections worldwide. Early data from South Africa demonstrated that the proportion of COVID-19 cases caused by the Omicron variant rose from 3% in early October, to 98% by early December(137). In late December 2021, meanwhile, the doubling time for number of positive Omicron cases was between two and three in the UK, US, and much of Europe(138, 139), highlighting the transmissibility of this variant. The mutations harboured by Omicron that enhance its binding affinity(135, 136) and ability to escape neutralising antibodies(17) likely drove its rapid spread, as did its fast replication rate, which is around 70 times faster than the Delta and primary strains(140). The reinfection rate of Omicron has also been found to be significantly higher than that of previous variants in studies from Scotland(141) and South Africa(142).

The Omicron variant has extensive but incomplete escape from naturally acquired and vaccine-induced immunity(143, 144). Compared to the Delta variant, Omicron requires around a ten-fold increased antibody titre to be neutralised, following vaccination with either Oxford-AstraZeneca or Pfizer/BioNtech vaccines(145). Indeed, blood sera from individuals who had received two doses of the Pfizer/BioNtech vaccine exhibited more than a 25-fold reduction in neutralising antibody titres against the Omicron variant compared to the primary strain(146). T-cell responses to Omicron may remain intact, however. One preprint study demonstrated that 70-80% of the T-cell response targeting the S protein was maintained in those vaccinated or with prior infection, while the magnitude of Omicron cross-reactive T-cells was like that of both Delta and Beta variants(147). Furthermore, data from Pfizer/BioNtech revealed that 80% of the epitopes in the Omicron variant S protein that are recognised by CD8<sup>+</sup> T-cells were not affected by this variant's mutations, following two-doses of the vaccine(146). T-cell responses induced from vaccine administration or prior infection may, therefore, provide some protection from severe disease.

Recent real-world evidence has implied that Omicron infection is milder in severity than previous variants. In an early South African analysis, the risk of hospitalisation (aOR=0.2) was lower for Omicron infections compared to non-Omicron SARS-CoV-2 infections(137) while, compared to earlier infections associated with the Delta variant, Omicron-infected individuals had a lower risk of severe disease (aOR=0.3)(137). In December 2021 in England, Omicron cases were found to induce a significantly reduced risk of hospitalisation or presentation for emergency care in comparison to Delta cases(74, 75). The decreased disease severity inflicted by Omicron may be due to its reduced capacity for replication in lung tissue, which was found to be more than ten times less in lung tissue compared to Delta(140). Concordantly, the S protein of the Omicron variant is less efficient at cleaving the ACE2 receptor and entering cells of lung organoids(145), while is also less able to cause fusion between lung cells compared to Delta(145), which is often observed in cases of severe COVID-19. The reduction in replication within the lungs, and the preservation of T-cell responses likely contribute to the milder disease exerted by the Omicron variant.

1  
2  
3 Although the Omicron variant appears to manifest in mild disease, high case numbers may  
4 still result in many hospitalisations and deaths in those vulnerable to the virus. Omicron case  
5 numbers may be beginning to peak, however. In South Africa, a 29.7% decrease in weekly COVID-19  
6 cases were reported in the week ending 25<sup>th</sup> December 2021, compared to the previous week, and  
7 the Omicron wave is said to have passed(148). Concerningly, global case numbers continue to rise  
8 rapidly(149) and many countries will continue to feel the pressure exerted by the wave of Omicron  
9 infections.  
10  
11  
12

## 13 5.2 Variants of interest

### 14 5.2.1 Lambda

15  
16 The Lambda variant, of the C.37 lineage, was first documented in Peru in December 2020 and  
17 was designated as a VOI on 14<sup>th</sup> June 2021(3). This variant contains the S protein mutations; D614G,  
18 L452Q, and F490S(104). The L452Q mutation, located within the RBD, enhances binding affinity to the  
19 ACE2 receptor and increases the infectivity of Lambda(150), while, together L452Q and F490S  
20 increase the resistance of this variant to vaccine-elicited antibody neutralisation(150). Furthermore,  
21 F490S was identified as being a high-risk mutation for enhancing abilities to escape  
22 neutralisation(150).  
23  
24

25 Infectivity of the Lambda variant may be higher than that of Alpha, Gamma, and other D614G  
26 containing variants(151), suggesting that Lambda could potentially spread more rapidly and  
27 effectively. Additionally, compared to the primary SARS-CoV-2 virus, antibody neutralisation was  
28 found to be decreased by 3.05-fold for the Lambda variant, higher than that for Gamma (2.33-fold)  
29 and Alpha (2.03-fold) variants(151). However, findings suggest that the Lambda variant can be  
30 neutralised by monoclonal antibodies and current vaccines are protective against this variant(150).  
31  
32  
33

### 34 5.2.2 Mu

35 The Mu variant, from the B.1.621 lineage, was first documented in Columbia in January 2021  
36 before receiving designation as a VOI on 30<sup>th</sup> August 2021(3). This variant contains the  
37 aforementioned S protein mutations E484K, N501Y, D614G, and P681H(104). Mu also contains the S  
38 protein mutation R346K, located within the RBD(104, 152), which may induce large binding free  
39 energy changes that disrupt the binding of antibodies to the S protein and enhance the ability of the  
40 variant to escape neutralisation(153). As discussed, the E484K, N501Y, D614G, and P681H mutations  
41 have been shown to increase transmissibility(80, 85, 87, 105, 109, 112, 120, 121) and neutralisation  
42 escape(91, 106) suggesting that the Mu SARS-CoV-2 variant is likely to be more infectious than the  
43 primary strain.  
44  
45  
46  
47

48 Although the Lambda and Mu variants have been outcompeted by Delta and now Omicron,  
49 the development and spread of VOIs will need to be closely monitored and studied to appreciate their  
50 pathogenicity, transmissibility, and virulence.  
51  
52

## 53 5.3 VUM

54 As of 25<sup>th</sup> January 2022, there are three VUM listed by the WHO(3) (*table 1*).

## 57 6. Vaccinations

58 The COVID-19 pandemic prompted a rapid international search for safe and effective vaccines  
59 against the SARS-CoV-2 virus. In line with previous vaccine development, including for both SARS-CoV  
60

1  
2  
3 and MERS-CoV, the S protein was a key target for COVID-19 vaccine development(154). As of 24<sup>th</sup>  
4 January 2022, 33 approved vaccines are in use in 197 countries, with ten vaccines having gained  
5 emergency use listing approval from the WHO(4), (**table 2**). As of 25<sup>th</sup> January 2022 there are 194  
6 vaccines in pre-clinical development and 140 in clinical development(155). Numerous studies have  
7 explored the effectiveness of approved vaccines, however, large variations in vaccine effectiveness  
8 are reported. This variability is likely due to several factors in the studies including, the country, date,  
9 and population size of the study, as well as the SARS-CoV-2 variants circulating during the study period.  
10 These factors, along with how the effectiveness is reported, mean that it is difficult to compare  
11 vaccines and fully understand how effective each vaccine is. Here, we review the COVID-19 vaccines  
12 in use around the world.  
13  
14  
15  
16

### 17 **6.1 Pfizer/BioNTech - BNT162b2**

18 The BNT162b2 vaccine (Comirnaty) is a lipid nanoparticle-formulated, nucleoside-modified  
19 mRNA vaccine encoding a modified SARS-CoV-2 S protein which was developed through a  
20 collaborative effort between Pfizer (New York, US) and BioNTech (Mainz, Germany)(156, 157).  
21 BNT162b2 gained WHO emergency use listing on 31<sup>st</sup> December 2020(158) and, as of 24<sup>th</sup> January  
22 2022, has been approved for use in 136 countries(4).  
23  
24

25 Following administration of BNT162b2, a Th1-biased response is observed, with tumour  
26 necrosis factor alpha (TNF $\alpha$ ), interferon gamma (IFN $\gamma$ ), and interleukin-2 (IL-2) all elevated following  
27 vaccination, compared to placebo(159, 160). Highest neutralisation titres are found between seven  
28 and fourteen days following the second dose(161), while those previously infected with COVID-19  
29 showed a four-fold increase in antibody binding and a 18-fold increase in neutralisation titres  
30 compared to previously uninfected individuals following two-doses(162). The BNT162b vaccine is well  
31 tolerated, with limited reactogenicity. Redness and swelling at injection site have been reported,  
32 however mild or moderate pain at the injection site is the most commonly reported reaction to  
33 vaccination(161). Fatigue, muscle pain, headache and chills are other commonly reported symptoms  
34 following BNT162b2 administration(163). The rate of systemic reactions after a second dose of  
35 BNT162b has been found to be 1.7 to 2 times higher than after a first dose, possibly suggesting an  
36 immunity-boosting effect(164). Many safety reports of this vaccine describe no serious adverse  
37 events(161, 164, 165), however, a large study found that BNT162b2 was associated with an increased  
38 risk of myocarditis, lymphadenopathy, appendicitis, and herpes zoster infection(166). Although rare,  
39 allergic reaction or anaphylaxis has also been reported following administration of the BNT162b2  
40 vaccine(163). **Table 2** outlines clinical trial and real-world data for vaccine effectiveness.  
41  
42  
43  
44  
45  
46

### 47 **6.2 Oxford-AstraZeneca – AZD1222**

48 The AZD1222 vaccine (Vaxzevria) is a non-replicating vector of the chimpanzee adenovirus  
49 ChAdOx1, modified to encode the SARS-CoV-2 S protein(167). Developed through collaboration  
50 between the University of Oxford and AstraZeneca (Cambridge, UK), this vaccine was given WHO  
51 emergency use listing on 16<sup>th</sup> February 2021(158) and has been approved for use in 137 countries, as  
52 of 24<sup>th</sup> January 2022(4). The WHO has granted emergency use listing to two versions of this vaccine  
53 (AZD1222 and Covishield) in order to utilise Covishield as part of their worldwide COVAX initiative, which  
54 is being produced by the Serum Institute of India and AstraZeneca-SKBio (Republic of Korea)(168).  
55

56 Following administration of AZD1222, significant antibody production, predominantly of IgG1  
57 and IgG3 subclasses, and a Th-1 cell response, with increased expression of IFN $\gamma$  and TNF $\alpha$ , is  
58 seen(122, 169). One dose of AZD1222 has been shown to produce a neutralising antibody response in  
59  
60

1  
2  
3 91% of participants, while a second dose resulted in 100% of participants producing neutralising  
4 antibodies(170). Mild and moderate itch, pain, redness, swelling, tenderness, and warmth are  
5 common local reactions, while chills, fatigue, fever, headache, muscle ache, and nausea are commonly  
6 reported systemic reactions following AZD1222 administration(170). Rare symptoms, including severe  
7 chest pain, nasal bleeding, and allergic reaction have been reported following AZD1222  
8 administration(171). **Table 2** outlines clinical trial and real-world data for vaccine effectiveness.  
9  
10

### 11 12 **6.3 Johnson & Johnson - Ad26.COV.2.S**

13 The Ad26.COV.2.S vaccine is a non-replicating adenovirus vector, modified to contain the  
14 SARS-CoV-2 S protein in a prefusion-stabilised conformation and requires a single dose(172). This  
15 vector was developed from the recombinant human adenovirus type 26 by the Janssen  
16 pharmaceutical company of Johnson & Johnson (New Brunswick, New Jersey, US)(172) and was listed  
17 for WHO emergency use listing on 12<sup>th</sup> March 2021(158). As of 24<sup>th</sup> January 2022, Ad26.COV.2.S has  
18 been approved for use in 106 countries(4).  
19

20 The Ad26.COV.2.S vaccine induces the production of a variety of antibody subclasses, such as  
21 IgG, IgM, and IgA, and promotes several non-neutralising antibody responses, including activation of  
22 CD4+ and CD8+ Th1-cells and production of IFN $\gamma$ , IL-2, and TNF $\alpha$ (173, 174). Although neutralising  
23 antibody responses induced by Ad26.COV.2.S are reduced against SARS-CoV-2 variants, non-  
24 neutralising antibody and T-cell responses have been found to be preserved against VOC(173), while  
25 a prior COVID-19 infection significantly increases levels of S protein-binding antibodies, antibody-  
26 dependent cellular cytotoxicity, and neutralising antibodies against VOCs including Beta and  
27 Delta(175). Ad26.COV.2.S is safe and well tolerated, with a large clinical trial demonstrating that  
28 headache, fatigue, and myalgia, are the most common systemic reactions, while injection-site pain is  
29 the most common local reaction following administration(172). Like other vaccines, Ad26.COV.2.S has  
30 been associated with serious adverse events, such as allergic reactions and cerebral venous sinus  
31 thrombosis, however, these are rare(163, 176). **Table 2** outlines clinical trial and real-world data for  
32 vaccine effectiveness.  
33  
34  
35  
36  
37  
38

### 39 **6.4 Moderna – mRNA-1273**

40 The mRNA-1273 vaccine (Spikevax) developed by Moderna (Massachusetts, US) is a lipid-  
41 nanoparticle-encapsulated mRNA vaccine expressing the SARS-CoV-2 S protein that has been  
42 prefusion-stabilised(177). This vaccine gained WHO emergency use listing on 30<sup>th</sup> April 2021(158), and  
43 as of 24<sup>th</sup> January 2022, has been approved for use in 85 countries(4).  
44

45 The mRNA-1273 vaccine elicits a strong CD4+ Th-1 cell response, with TNF $\alpha$ , IFN $\gamma$ , and IL-2  
46 expression increased following administration(178-180), while neutralising antibody titres have been  
47 shown to significantly increase up until around 28 days following the second dose of the vaccine, and  
48 afterwards remain consistently high(181). Fatigue, muscle pain, headache, chills, joint pain, and  
49 injection-site pain/reaction are common adverse effects caused by the mRNA-1273 vaccine(163, 177),  
50 while serious adverse effects are often avoided(177, 181). Serious adverse events, including allergic  
51 reaction and anaphylaxis are rare, but not inconceivable following mRNA-1273 administration(163).  
52 **Table 2** outlines clinical trial and real-world data for vaccine effectiveness.  
53  
54  
55

### 56 **6.5 Other WHO emergency use listed COVID-19 vaccines**

57 In addition to the five COVID-19 vaccines described previously, five other vaccines have gained  
58 emergency use listing by the WHO. First, the Sinopharm BBIBP-CorV COVID-19 vaccine (Covilo) was  
59  
60

1  
2  
3 developed by the Beijing Bio-Institute of Biological Products, a subsidiary of China National Biotec  
4 Group, and was given WHO emergency use listing on 7<sup>th</sup> May 2021(158). This vaccine is a 19nCoV-  
5 CDC-Tan-HB02 strain SARS-CoV-2 antigen that is produced in Vero cells, inactivated by  $\beta$ -  
6 propiolactone, and then purified and absorbed with aluminium hydroxide(182). Next, the CoronaVac  
7 vaccine, developed by Sinovac Biotech (Beijing, China), was listed for WHO emergency use on 1<sup>st</sup> June  
8 2021(158). Like the BBIBP-CorV vaccine, this vaccine is a Vero cell-based, aluminium hydroxide-  
9 adjuvanted,  $\beta$ -propiolactone-inactivated vaccine, however, it is based on the SARS-CoV-2 CZ02  
10 strain(183). Covaxin (BBV152) is a whole virion inactivated SARS-CoV-2 vaccine formula developed by  
11 Bharat Biotech International Ltd (India)(184) which gained emergency use listing from the WHO On 3<sup>rd</sup>  
12 November 2021(185). Lastly, Covovax and its originator, Nuvaxovid (NVX-CoV2372), were both  
13 developed by Novavax (Maryland, United States) and the Coalition for Epidemic Preparedness  
14 Innovations (Oslo, Norway), and gained emergency use listing on 17<sup>st</sup> and 21<sup>th</sup> December 2021,  
15 respectively(186, 187). Both vaccines are manufactured using the same technology, and consist of a  
16 recombinant SARS-CoV-2 S protein nanoparticle administered with the adjuvant Matrix-M as a co-  
17 formulation(188). These vaccines produce similar immune responses to those already discussed.  
18 Studies assessing the efficacy of these vaccines are outlined in **table 2**.  
19  
20  
21  
22  
23  
24

### 25 **6.10 Other approved vaccines**

26 In addition to the vaccines that have received emergency use listing from the WHO, around  
27 the world, vaccines have been developed, tested, and approved to combat COVID-19. As of 24<sup>th</sup>  
28 January 2022, 33 vaccines, including the ten described above, have been approved in at least one  
29 country(4). The remaining 23 approved vaccines are outlined in **table 3**.  
30  
31  
32

### 33 **6.11 Waning immunity and boosters**

34 Throughout the COVID-19 pandemic, emerging variants have threatened the effectiveness of  
35 vaccines (**table 2**). Simultaneously, waning immunity following vaccination questions how long  
36 vaccines remain effective and highlights the importance of booster doses. Indeed, protection against  
37 SARS-CoV-2 following vaccination decreases over time, both in terms of antibody titres(189-191) and  
38 vaccine effectiveness(192-195). Cellular responses, such as T-cell immunity, may persist for longer  
39 periods, however(196, 197). With a gradual loss of protection from SARS-CoV-2 following COVID-19  
40 vaccination, many countries are now rolling out booster programmes with the aim of raising levels of  
41 immunity.  
42  
43  
44

45 Since booster programmes began, evidence that a booster vaccine dose enhances antibody  
46 and cellular responses has accumulated. Following a third dose of vaccine, neutralising antibody titres  
47 increase significantly(198-201) and, in some cases, to higher levels than after the primary two  
48 doses(198). Additionally, boosters have also been found to increase neutralising antibody titres  
49 against Beta, Gamma, Delta, and Omicron variants(199, 202, 203). T-cell response is also enhanced  
50 following a third dose(200, 204, 205). Together, enhancing neutralising antibody and cellular  
51 responses with a booster vaccine dose is likely to provide a greater level of protection than relying on  
52 immunity built through a primary regimen.  
53  
54

55 The antibody and cellular responses observed following booster vaccinations have been found  
56 to correlate with increased levels of protection against SAR-CoV-2 infection and severe illness. On 30<sup>th</sup>  
57 July 2021, Israel was the first country to offer a third dose of BNT162b2 to certain groups.  
58 Subsequently, several studies have revealed that those who received a third vaccine dose were  
59 significantly less likely to be infected or have severe disease with SARS-CoV-2 compared to those who  
60



1  
2  
3 received two-doses(206-209). In those aged 60 or older, an observational study demonstrated that  
4 the rate of severe COVID-19 and death was lower in the boosted group by a factor of 17.9 and 14.7,  
5 respectively, compared to the non-boosted group(210). Booster doses of COVID-19 vaccine have been  
6 shown to be effective against infection with Delta(211, 212) and, to a lesser degree, Omicron  
7 variants(75, 145, 146, 212-214) despite the numerous mutations harboured by these variants. Overall,  
8 increasing evidence is pointing towards the benefits of booster doses of COVID-19 vaccines, therefore  
9 it is expected that booster programmes will continue to roll out across the globe. Based on current  
10 evidence, the CDC recommend that the time interval for receiving a booster following the primary  
11 regimen is five months for Pfizer/BioNTech BNT162b2 primary regimen, six months for Moderna  
12 mRNA-1273 primary regimen, and two months for Johnson & Johnson Ad26.COV2.S primary  
13 regimen(215). As the pandemic progresses and new variants emerge, variant-specific vaccines may  
14 require development, with pre-clinical studies demonstrating their efficacy(216) and pharmaceutical  
15 companies, such as Pfizer, advancing in variant-specific vaccine development(146). Policy makers  
16 should also consider when vaccine boosters will be given in the future and who will receive booster  
17 doses in the long-term.  
18  
19  
20  
21  
22

## 23 **7. Emerging Treatments**

24  
25 As more is learnt about the virus, the therapeutic strategy against COVID-19 develops. There  
26 are currently over two thousand ongoing trials assessing certain treatment strategies for COVID-  
27 19(217). Recently, antivirals including molnupiravir (Lagevrio) and nirmatrelvir/ritonavir (Paxlovid)  
28 have been approved in the UK(218, 219), US(220, 221), and Europe(222, 223) for treating COVID-19  
29 in certain risk groups. Similarly, sotrovimab (Xevudy), a monoclonal antibody treatment, has recently  
30 been approved for use in treating certain COVID-19 patients in the UK(224), US(225), and Europe(226).  
31 These drugs have been shown to be effective at preventing poor clinical outcomes, including death,  
32 in those vulnerable to severe COVID-19 infection. Other drug treatments, such as janus kinase  
33 inhibitors, corticosteroids, and anti-inflammatories have contrasting evidence to support their use,  
34 and therefore, the use of specific drugs is either recommended for or against by certain treatment  
35 and management guidelines, which are discussed below.  
36  
37  
38  
39  
40

## 41 **8. Guidelines**

42 The treatment and management of COVID-19 is a continually evolving topic, however, health  
43 authorities have published and continue to update guidelines and recommendations for treating  
44 COVID-19. The WHO living guideline on COVID-19 and therapeutics is regularly updated, with the  
45 latest version, published on 14<sup>th</sup> January 2022 containing 14 recommendations on COVID-19  
46 treatment(227). In the UK, the National Institute for Health and Care Excellence (NICE)(228) and  
47 Medicines and Healthcare products Regulatory Agency (MHRA)(229) provide updated guidelines on  
48 COVID-19 treatment, while in Europe, the ECDC regularly publishes several guidelines providing  
49 recommendations on a range of COVID-19 related topics(230). In the US, the National Institutes of  
50 Health (NIH)(231) and the CDC(232) provide guidance on COVID-19 treatment and management, with  
51 the CDC supplying guidelines for specific groups including, employers, schools, health departments,  
52 and governments.  
53  
54  
55  
56

## 57 **9. Considerations for the future**

58 **Novel infectious diseases and pandemics are an unpredictable but inevitable aspect of nature**  
59 **and it is, therefore, important that we learn from past pandemics to prepare for future ones. Firstly,**  
60



1  
2  
3 the COVID-19 pandemic has highlighted and amplified the existing inequalities within society(233),  
4 with non-white ethnicity, social disadvantage, and unemployment all risk factors for testing positive  
5 for COVID-19(234) and those most economically deprived found to be particularly vulnerable(235).  
6 These inequalities require addressing to be better prepared for similar situations in the future. Next,  
7 to progress through a pandemic we should be racing the pathogen, not each other. This statement  
8 becomes apparent when you consider the problems countries faced when seeking out PPE(236), and  
9 the vaccine inequity seen around the world(237), with developed countries often better placed to be  
10 able to purchase these items. Initiatives such as the WHO's COVAX programme are vital to protect  
11 those most vulnerable and reduce the global spread of disease. In October 2021, the UK government  
12 released a publication outlining where the policies implemented to reduce the impact of the COVID-  
13 19 pandemic failed, and the lessons learned from these failures (238). Here, it is clear that there is  
14 room for improvement, with the publication presenting conclusions and recommendations on how to  
15 enhance pandemic preparedness, lockdown and social distancing measures, testing and contact  
16 tracing, social care, and vaccines. In countries such as the UK, US, and much of Europe, where the  
17 COVID-19 death rate has been high, steps need to be taken and lessons need to be learnt in order to  
18 be better prepared for the next pandemic. The responsibility of improving pandemic response lies  
19 with policy makers, the medical/scientific community, and the public, and will ultimately require a  
20 collaborative approach.

21  
22  
23  
24  
25  
26 Certain aspects of the response to the COVID-19 pandemic have been a triumph, however.  
27 One of the major victories was the rapid development and rollout of vaccines(239), which continue to  
28 be effective. The rollout of rapid testing and quarantine for positive cases was also important to at  
29 least disrupt the spread of the virus, especially given that asymptomatic individuals can contribute to  
30 the spread. Furthermore, the swift identification and sharing of knowledge of SARS-CoV-2 variants  
31 between countries should be applauded. Lessons can be learned from countries where COVID-19 was  
32 controlled. In Taiwan, managing the pandemic as directed by pre-COVID-19 pandemic plans prompted  
33 an immediate response; screening of all airline passengers arriving from Wuhan and high risk areas,  
34 restricting entry for non-Taiwanese citizens, 14-day quarantine period for contacts of confirmed cases  
35 or returning travellers, a ban on large gatherings, and widespread mask wearing were some of the  
36 quickly implemented management strategies(240). New Zealand implemented similarly effective  
37 restrictions, with the addition of a national lockdown(240). Many of the pandemic control components  
38 that kept case and death numbers low in Taiwan and New Zealand could be adopted by other  
39 countries in the future and may lead to greater outcomes in terms of protecting both health of  
40 individuals and the health and wellbeing of the country. Overall, there is much to be learnt from the  
41 COVID-19 pandemic and, as we emerge from it, inspection of which policies failed, and which  
42 succeeded are imperative.

## 43 44 45 46 47 48 49 50 **10. Conclusion**

51 COVID-19 remains prevalent and life-threatening. Although rollout of vaccines has been  
52 successful, we must aim to address unmet goals, such as attaining a high global vaccination coverage  
53 and ensuring that all healthcare systems have the capacity to cope with seasonal waves. With Omicron  
54 highly prevalent, we must continue to learn, develop therapeutics, and remain vigilant to new VOCs.  
55 Here, we have provided an overview of the virology of SARS-CoV-2, including the mutations harboured  
56 by variants of the virus and how these mutations effect its transmissibility and virulence. Lastly, we  
57 discussed the vaccines that have been developed and administered around the world and provided  
58  
59  
60

evidence supporting the rollout of booster doses. Future priorities should focus on continuing vaccination programmes and developing variant-specific vaccines as new mutations emerge. This, along with the expansion of our knowledge of SARS-CoV-2 and which therapies are most successful to treat infections with it will ultimately lead to favourable outcomes moving forward.

### **Research Questions**

- 1) How will the SARS-CoV-2 virus mutate in the future, and which mutations will give a competitive advantage that will allow the virus to inflict disease to many people?
- 2) How do we keep up with the rapidly changing SARS-CoV-2 environment and ensure that vaccines remain effective?
- 3) How do we manage the booster programme and when will future booster vaccinations be required in order to maintain high levels of immunity?
- 4) How can we learn from the current and past pandemics so that we are better prepared for the next one?

**Patient Involvement:** Patients who had been infected with covid-19 were contacted and requested to review the initial drafts of this manuscript. The received feedback was mostly positive and assisted in developing and focusing our review. Final drafts were also reviewed by patients who had had covid-19 and similar positive feedback was received.

**Contributorship statement and guarantor:** MY and HC performed the literature search and drafted the manuscript. HC revised and finalised the manuscript. JS reviewed and revised the manuscript. PE was responsible for the concept and design of the work. PE reviewed, revised, and finalised the manuscript. PE is the guarantor.

**Competing interests:** We have read and understood the BMJ policy on declaration of interests and declare the following interests: PE was funded by the Medical Research Council and now by Higher Education Funding Council for England (HEFCE). He has also received grants from Alzheimer's Research, UK, Alzheimer's Drug Discovery Foundation, Alzheimer's Society, UK, Medical Research Council, Alzheimer's Association US, Van-Geest foundation, and European Union grants. PE is a consultant to Roche, Pfizer, and Novo Nordisk. He has received educational and research grants from GE Healthcare, Novo Nordisk, Piramal Life Science/Life Molecular Imaging, Avid Radiopharmaceuticals and Eli Lilly. He is a member of the Scientific Advisory Board at Novo Nordisk. None of these were related to COVID-19

**Copyright statement:** The Corresponding Author has the right to grant on behalf of all authors and does grant on behalf of all authors, an exclusive licence (or non-exclusive for government employees) on a worldwide basis to the BMJ Publishing Group Ltd to permit this article (if accepted) to be published in BMJ editions and any other BMJPL products and sub-licenses such use and exploit all subsidiary rights, as set out in our licence ([bmj.com/advice/copyright.shtml](https://bmj.com/advice/copyright.shtml))."

### **Figure Legends:**

**Figure 1: Genome and structure of SARS-CoV-2. A) SARS-CoV-2 genome and S protein amino acid composition.** The SARS-CoV-2 genome is approximately 30,000 base pairs (bp) long and consists of open reading frames (ORF) and elements that are essential for the virus' structure. The spike S

1  
2  
3 protein is responsible for binding and entry into host cells. SARS-CoV-2 variants of concern (VOC)  
4 contain various S protein non-synonymous mutations that result in amino acid changes in the  
5 receptor binding domain (orange text) and the S1/S2 subunit interface (black text) which have been  
6 demonstrated to enhance transmissibility of the virus. VOC include Alpha ( $\alpha$ ), Beta ( $\beta$ ), Gamma ( $\gamma$ ),  
7 and Delta ( $\delta$ ). **B) SARS-CoV-2 structure.** SARS-CoV-2 is a RNA virus that has a crown-like appearance  
8 and contains four major structural proteins: nucleocapsid (N), spike (S), envelope (E), and membrane  
9 (M). **C) S and ACE2 interaction.** The SARS-CoV-2 S protein directly interacts with human angiotensin-  
10 converting enzyme 2 (ACE2) receptors in order to gain entry into host cells. The receptor binding  
11 domain (RBD) of the S protein tightly binds to ACE2. **D) Spike protein structure.** The S protein  
12 protrudes out from the main SARS-CoV-2 bulk and is comprised of two subunits: S1 and S2. S1  
13 contains the RBD which directly interacts with the human ACE2 receptor, while the S1/S2 interface  
14 contains a furin cleavage site which is cleaved to allow S2 to fuse with the host cell membrane. Both  
15 the RBD and the S1/S2 interface contain transmissibility increasing mutations that are harboured in  
16 variants of concern.  
17  
18  
19

20  
21 **Figure 2: Viral entry and host response. A) At the alveolar epithelial cell layer.** Epithelial cells in the  
22 lungs express both angiotensin-converting enzyme 2 (ACE2) receptors and transmembrane protease  
23 serine 2 (TMPRSS2), allowing for infection by SARS-CoV-2. Replication of the virus within these cells  
24 induces an intense immune response that attracts monocytes, T-cells and macrophages and, in some  
25 cases, can result in a cytokine storm. **B) Within nearby blood vessels.** Cytokines produced by the  
26 epithelial cell layer are released into blood vessels supplying the infected tissue, which causes the  
27 recruitment of further immune cells to the area, driving the damaging inflammatory response  
28 further. Circulating cytokines also create a systemic inflammatory environment. **C) Adaptive**  
29 **immune response.** Circulating lymphocytes carry viral antigens to lymph nodes and bone marrow to  
30 begin the adaptive immune system processes whereby B-cells, and later antibodies, are activated. **D)**  
31 **SARS-CoV2 host replication.** The SARS-CoV-2 virus utilises the ACE2 receptor and TMPRSS2 to gain  
32 entry into human cells. Following release of the viral RNA within the host cell, the virus utilises the  
33 host endoplasmic reticulum (ER) and Golgi apparatus to produce and manufacture new viral  
34 particles, which are released out of the cell to infect other cells and new hosts.  
35  
36  
37

38  
39 **Table 1: SARS-CoV-2 variants and their S protein mutations.** \*first detection worldwide.  
40 Information correct as of 24<sup>th</sup> January 2022.

41  
42 **Table 2: Vaccine effectiveness of vaccines that have gained WHO emergency use listing.** \*Adjusted  
43 for covariates when reported by study, dates are reported in dd/mm/yyyy format. Vaccine  
44 effectiveness days/months refers to days/months since vaccination dose. Information correct as of  
45 reported conclusion date of each study.  
46

47  
48 **Table 3: COVID-19 vaccines approved in at least one country.** Information correct as of 24<sup>th</sup>  
49 January 2022.

## 50 51 References

- 52 1. CDC.org [Internet]. Human Coronavirus Types. Centres for Disease Control and Prevention.  
53 [15 February 2020; cited 12 October 2021]. Available from:  
54 <https://www.cdc.gov/coronavirus/types.html>  
55
- 56 2. Who.int [Internet]. Weekly operational update on COVID-19 - 25 January 2022. World Health  
57 Organisation. [25 January 2022; cited 26 January 2022]. Available from:  
58 [https://www.who.int/publications/m/item/weekly-operational-update-on-covid-19---25-](https://www.who.int/publications/m/item/weekly-operational-update-on-covid-19---25-january-2022)  
59 [january-2022](https://www.who.int/publications/m/item/weekly-operational-update-on-covid-19---25-january-2022)  
60

- 1
  - 2
  - 3
  - 4
  - 5
  - 6
  - 7
  - 8
  - 9
  - 10
  - 11
  - 12
  - 13
  - 14
  - 15
  - 16
  - 17
  - 18
  - 19
  - 20
  - 21
  - 22
  - 23
  - 24
  - 25
  - 26
  - 27
  - 28
  - 29
  - 30
  - 31
  - 32
  - 33
  - 34
  - 35
  - 36
  - 37
  - 38
  - 39
  - 40
  - 41
  - 42
  - 43
  - 44
  - 45
  - 46
  - 47
  - 48
  - 49
  - 50
  - 51
  - 52
  - 53
  - 54
  - 55
  - 56
  - 57
  - 58
  - 59
  - 60
3. Who.int [Internet]. Tracking SARS-CoV-2 variants. World Health Organisation. [25 January 2022; cited 26 January 2022]. Available from: <https://www.who.int/en/activities/tracking-SARS-CoV-2-variants/>
  4. covid19.trackvaccines.org [Internet]. COVID-19 Vaccine Tracker. [24 January 2022; cited 26 January 2022]. Available from: <https://covid19.trackvaccines.org/>
  5. Chan JF, Yuan S, Kok KH, To KK, Chu H, Yang J, et al. A familial cluster of pneumonia associated with the 2019 novel coronavirus indicating person-to-person transmission: a study of a family cluster. *Lancet*. 2020;395(10223):514-23.
  6. Who.int [Internet]. Transmission of SARS-CoV-2: implications for infection prevention precautions - Scientific Brief. World Health Organisation. [9 July 2020; cited 28 October 2021]. Available from: <https://www.who.int/news-room/commentaries/detail/transmission-of-sars-cov-2-implications-for-infection-prevention-precautions>
  7. Gidari A, Sabbatini S, Bastianelli S, Pierucci S, Busti C, Bartolini D, et al. SARS-CoV-2 Survival on Surfaces and the Effect of UV-C Light. *Viruses*. 2021;13(3).
  8. Pottage T, Garratt I, Onianwa O, Spencer A, Paton S, Verlander NQ, et al. A comparison of persistence of SARS-CoV-2 variants on stainless steel. *J Hosp Infect*. 2021;114:163-6.
  9. Guo L, Wang M, Zhang L, Mao N, An C, Xu L, et al. Transmission risk of viruses in large mucosal droplets on the surface of objects: A time-based analysis. *Infect Dis Now*. 2021;51(3):219-27.
  10. Carraturo F, Del Giudice C, Morelli M, Cerullo V, Libralato G, Galdiero E, et al. Persistence of SARS-CoV-2 in the environment and COVID-19 transmission risk from environmental matrices and surfaces. *Environ Pollut*. 2020;265(Pt B):115010.
  11. Hui KP, Cheung M-C, Perera RA, Ng K-C, Bui CH, Ho JC, et al. Tropism, replication competence, and innate immune responses of the coronavirus SARS-CoV-2 in human respiratory tract and conjunctiva: an analysis in ex-vivo and in-vitro cultures. *The Lancet Respiratory Medicine*. 2020;8(7):687-95.
  12. McAloon C, Collins A, Hunt K, Barber A, Byrne AW, Butler F, et al. Incubation period of COVID-19: a rapid systematic review and meta-analysis of observational research. *BMJ Open*. 2020;10(8):e039652.
  13. Bliddal S, Banasik K, Pedersen OB, Nissen J, Cantwell L, Schwinn M, et al. Acute and persistent symptoms in non-hospitalized PCR-confirmed COVID-19 patients. *Sci Rep*. 2021;11(1):13153.
  14. Grant MC, Geoghegan L, Arbyn M, Mohammed Z, McGuinness L, Clarke EL, et al. The prevalence of symptoms in 24,410 adults infected by the novel coronavirus (SARS-CoV-2; COVID-19): A systematic review and meta-analysis of 148 studies from 9 countries. *PLoS One*. 2020;15(6):e0234765.
  15. Kronbichler A, Kresse D, Yoon S, Lee KH, Effenberger M, Shin JI. Asymptomatic patients as a source of COVID-19 infections: A systematic review and meta-analysis. *Int J Infect Dis*. 2020;98:180-6.
  16. Arons MM, Hatfield KM, Reddy SC, Kimball A, James A, Jacobs JR, et al. Presymptomatic SARS-CoV-2 Infections and Transmission in a Skilled Nursing Facility. *N Engl J Med*. 2020;382(22):2081-90.
  17. Cao Y, Wang J, Jian F, Xiao T, Song W, Yisimayi A, et al. B.1.1.529 escapes the majority of SARS-CoV-2 neutralizing antibodies of diverse epitopes. *BioRxiv [Preprint]*. 2021.
  18. Wolff D, Nee S, Hickey NS, Marschollek M. Risk factors for Covid-19 severity and fatality: a structured literature review. *Infection*. 2021;49(1):15-28.
  19. Zhou F, Yu T, Du R, Fan G, Liu Y, Liu Z, et al. Clinical course and risk factors for mortality of adult inpatients with COVID-19 in Wuhan, China: a retrospective cohort study. *Lancet*. 2020;395(10229):1054-62.

- 1
  - 2
  - 3
  - 4
  - 5
  - 6
  - 7
  - 8
  - 9
  - 10
  - 11
  - 12
  - 13
  - 14
  - 15
  - 16
  - 17
  - 18
  - 19
  - 20
  - 21
  - 22
  - 23
  - 24
  - 25
  - 26
  - 27
  - 28
  - 29
  - 30
  - 31
  - 32
  - 33
  - 34
  - 35
  - 36
  - 37
  - 38
  - 39
  - 40
  - 41
  - 42
  - 43
  - 44
  - 45
  - 46
  - 47
  - 48
  - 49
  - 50
  - 51
  - 52
  - 53
  - 54
  - 55
  - 56
  - 57
  - 58
  - 59
  - 60
20. Zhang J, Wang X, Jia X, Li J, Hu K, Chen G, et al. Risk factors for disease severity, unimprovement, and mortality in COVID-19 patients in Wuhan, China. *Clin Microbiol Infect.* 2020;26(6):767-72.
21. Ebinger JE, Achamallah N, Ji H, Claggett BL, Sun N, Botting P, et al. Pre-existing traits associated with Covid-19 illness severity. *PLoS One.* 2020;15(7):e0236240.
22. Williamson EJ, Walker AJ, Bhaskaran K, Bacon S, Bates C, Morton CE, et al. Factors associated with COVID-19-related death using OpenSAFELY. *Nature.* 2020;584(7821):430-6.
23. Li R, Tian J, Yang F, Lv L, Yu J, Sun G, et al. Clinical characteristics of 225 patients with COVID-19 in a tertiary Hospital near Wuhan, China. *J Clin Virol.* 2020;127:104363.
24. Guo L, Shi Z, Zhang Y, Wang C, Do Vale Moreira NC, Zuo H, et al. Comorbid diabetes and the risk of disease severity or death among 8807 COVID-19 patients in China: A meta-analysis. *Diabetes Res Clin Pract.* 2020;166:108346.
25. Feng Y, Ling Y, Bai T, Xie Y, Huang J, Li J, et al. COVID-19 with Different Severities: A Multicenter Study of Clinical Features. *Am J Respir Crit Care Med.* 2020;201(11):1380-8.
26. Tian J, Yuan X, Xiao J, Zhong Q, Yang C, Liu B, et al. Clinical characteristics and risk factors associated with COVID-19 disease severity in patients with cancer in Wuhan, China: a multicentre, retrospective, cohort study. *Lancet Oncol.* 2020;21(7):893-903.
27. Liang W, Guan W, Chen R, Wang W, Li J, Xu K, et al. Cancer patients in SARS-CoV-2 infection: a nationwide analysis in China. *Lancet Oncol.* 2020;21(3):335-7.
28. Vizcarra P, Perez-Elias MJ, Quereda C, Moreno A, Vivancos MJ, Dronza F, et al. Description of COVID-19 in HIV-infected individuals: a single-centre, prospective cohort. *Lancet HIV.* 2020;7(8):e554-e64.
29. Baillie JK, Wilson JF, Bulteel N, Hayward C, Klaric L, Porteous DJ, et al. Mapping the human genetic architecture of COVID-19. *Nature.* 2021.
30. Shelton JF, Shastri AJ, Ye C, Weldon CH, Filshtein-Somnez T, Coker D, et al. Trans-ethnic analysis reveals genetic and non-genetic associations with COVID-19 susceptibility and severity. *MedRxiv [Preprint].* 2020.
31. Ellinghaus D, Degenhardt F, Bujanda L, Buti M, Albillos A, Invernizzi P, et al. Genomewide association study of severe covid-19 with respiratory failure/[...]. *New England Journal of Medicine Boston: Massachusetts Medical Society,* 2020, vol 383, no 16. 2020.
32. Hoffmann M, Kleine-Weber H, Schroeder S, Krüger N, Herrler T, Erichsen S, et al. SARS-CoV-2 cell entry depends on ACE2 and TMPRSS2 and is blocked by a clinically proven protease inhibitor. *cell.* 2020;181(2):271-80. e8.
33. Hou Y, Zhao J, Martin W, Kallianpur A, Chung MK, Jehi L, et al. New insights into genetic susceptibility of COVID-19: an ACE2 and TMPRSS2 polymorphism analysis. *BMC medicine.* 2020;18(1):1-8.
34. Barbry P, Muus C, Luecken M, Eraslan G, Waghay A, Heimberg G, et al. Integrated analyses of single-cell atlases reveal age, gender, and smoking status associations with cell type-specific expression of mediators of SARS-CoV-2 viral entry and highlights inflammatory programs in putative target cells. *BioRxiv [Preprint].* 2020.
35. Prakrithi P, Lakra P, Sundar D, Kapoor M, Mukerji M, Gupta I, et al. Genetic Risk Prediction of COVID-19 Susceptibility and Severity in the Indian Population. *Front Genet.* 2021;12:714185.
36. Huang QM, Zhang PD, Li ZH, Zhou JM, Liu D, Zhang XR, et al. Genetic Risk and Chronic Obstructive Pulmonary Disease Independently Predict the Risk of Incident Severe COVID-19. *Ann Am Thorac Soc.* 2022;19(1):58-65.
37. Zhou Y, Qian X, Liu Z, Yang H, Liu T, Chen K, et al. Coagulation factors and the incidence of COVID-19 severity: Mendelian randomization analyses and supporting evidence. *Signal Transduct Target Ther.* 2021;6(1):222.

- 1
  - 2
  - 3
  - 4
  - 5
  - 6
  - 7
  - 8
  - 9
  - 10
  - 11
  - 12
  - 13
  - 14
  - 15
  - 16
  - 17
  - 18
  - 19
  - 20
  - 21
  - 22
  - 23
  - 24
  - 25
  - 26
  - 27
  - 28
  - 29
  - 30
  - 31
  - 32
  - 33
  - 34
  - 35
  - 36
  - 37
  - 38
  - 39
  - 40
  - 41
  - 42
  - 43
  - 44
  - 45
  - 46
  - 47
  - 48
  - 49
  - 50
  - 51
  - 52
  - 53
  - 54
  - 55
  - 56
  - 57
  - 58
  - 59
  - 60
38. Payne S. Family Coronaviridae. *Viruses* 2017. p. 149-58.
39. Masters PS, Kuo L, Ye R, Hurst KR, Koetzner CA, Hsue B. Genetic and molecular biological analysis of protein-protein interactions in coronavirus assembly. *Adv Exp Med Biol.* 2006;581:163-73.
40. Khailany RA, Safdar M, Ozaslan M. Genomic characterization of a novel SARS-CoV-2. *Gene Rep.* 2020;19:100682.
41. Thoms M, Buschauer R, Ameismeier M, Koepke L, Denk T, Hirschenberger M, et al. Structural basis for translational shutdown and immune evasion by the Nsp1 protein of SARS-CoV-2. *Science.* 2020;369(6508):1249-55.
42. Schubert K, Karousis ED, Jomaa A, Scaiola A, Echeverria B, Gurzeler LA, et al. SARS-CoV-2 Nsp1 binds the ribosomal mRNA channel to inhibit translation. *Nat Struct Mol Biol.* 2020;27(10):959-66.
43. Huang C, Lokugamage KG, Rozovics JM, Narayanan K, Semler BL, Makino S. SARS coronavirus nsp1 protein induces template-dependent endonucleolytic cleavage of mRNAs: viral mRNAs are resistant to nsp1-induced RNA cleavage. *PLoS Pathog.* 2011;7(12):e1002433.
44. Snijder EJ, Decroly E, Ziebuhr J. The Nonstructural Proteins Directing Coronavirus RNA Synthesis and Processing. *Adv Virus Res.* 2016;96:59-126.
45. V'Kovski P, Gerber M, Kelly J, Pfaender S, Ebert N, Braga Lagache S, et al. Determination of host proteins composing the microenvironment of coronavirus replicase complexes by proximity-labeling. *Elife.* 2019;8.
46. Masters PS. The molecular biology of coronaviruses. *Advances in virus research.* 2006;66:193-292.
47. Siu Y, Teoh K, Lo J, Chan C, Kien F, Escriou N, et al. The M, E, and N structural proteins of the severe acute respiratory syndrome coronavirus are required for efficient assembly, trafficking, and release of virus-like particles. *Journal of virology.* 2008;82(22):11318-30.
48. Kuo L, Masters PS. Genetic evidence for a structural interaction between the carboxy termini of the membrane and nucleocapsid proteins of mouse hepatitis virus. *J Virol.* 2002;76(10):4987-99.
49. Hulswit RJ, de Haan CA, Bosch BJ. Coronavirus Spike Protein and Tropism Changes. *Adv Virus Res.* 2016;96:29-57.
50. Konno Y, Kimura I, Uriu K, Fukushi M, Irie T, Koyanagi Y, et al. SARS-CoV-2 ORF3b Is a Potent Interferon Antagonist Whose Activity Is Increased by a Naturally Occurring Elongation Variant. *Cell Rep.* 2020;32(12):108185.
51. Kopecky-Bromberg SA, Martinez-Sobrido L, Frieman M, Baric RA, Palese P. Severe acute respiratory syndrome coronavirus open reading frame (ORF) 3b, ORF 6, and nucleocapsid proteins function as interferon antagonists. *J Virol.* 2007;81(2):548-57.
52. Xia H, Cao Z, Xie X, Zhang X, Chen JY, Wang H, et al. Evasion of Type I Interferon by SARS-CoV-2. *Cell Rep.* 2020;33(1):108234.
53. Wong HH, Fung TS, Fang S, Huang M, Le MT, Liu DX. Accessory proteins 8b and 8ab of severe acute respiratory syndrome coronavirus suppress the interferon signaling pathway by mediating ubiquitin-dependent rapid degradation of interferon regulatory factor 3. *Virology.* 2018;515:165-75.
54. Azad GK, Khan PK. Variations in Orf3a protein of SARS-CoV-2 alter its structure and function. *Biochem Biophys Rep.* 2021;26:100933.
55. Ren Y, Shu T, Wu D, Mu J, Wang C, Huang M, et al. The ORF3a protein of SARS-CoV-2 induces apoptosis in cells. *Cell Mol Immunol.* 2020;17(8):881-3.
56. Kreimendahl S, Rassow J. The Mitochondrial Outer Membrane Protein Tom70-Mediator in Protein Traffic, Membrane Contact Sites and Innate Immunity. *Int J Mol Sci.* 2020;21(19).

- 1
  - 2
  - 3
  - 4
  - 5
  - 6
  - 7
  - 8
  - 9
  - 10
  - 11
  - 12
  - 13
  - 14
  - 15
  - 16
  - 17
  - 18
  - 19
  - 20
  - 21
  - 22
  - 23
  - 24
  - 25
  - 26
  - 27
  - 28
  - 29
  - 30
  - 31
  - 32
  - 33
  - 34
  - 35
  - 36
  - 37
  - 38
  - 39
  - 40
  - 41
  - 42
  - 43
  - 44
  - 45
  - 46
  - 47
  - 48
  - 49
  - 50
  - 51
  - 52
  - 53
  - 54
  - 55
  - 56
  - 57
  - 58
  - 59
  - 60
57. Gordon DE, Jang GM, Bouhaddou M, Xu J, Obernier K, White KM, et al. A SARS-CoV-2 protein interaction map reveals targets for drug repurposing. *Nature*. 2020;583(7816):459-68.
58. Dominguez Andres A, Feng Y, Campos AR, Yin J, Yang CC, James B, et al. SARS-CoV-2 ORF9c Is a Membrane-Associated Protein that Suppresses Antiviral Responses in Cells. *BioRxiv* [Preprint]. 2020.
59. Redondo N, Zaldivar-Lopez S, Garrido JJ, Montoya M. SARS-CoV-2 Accessory Proteins in Viral Pathogenesis: Knowns and Unknowns. *Front Immunol*. 2021;12:708264.
60. Bosch BJ, van der Zee R, de Haan CA, Rottier PJ. The coronavirus spike protein is a class I virus fusion protein: structural and functional characterization of the fusion core complex. *J Virol*. 2003;77(16):8801-11.
61. Li F. Structure, Function, and Evolution of Coronavirus Spike Proteins. *Annu Rev Virol*. 2016;3(1):237-61.
62. Wrapp D, Wang N, Corbett KS, Goldsmith JA, Hsieh CL, Abiona O, et al. Cryo-EM structure of the 2019-nCoV spike in the prefusion conformation. *Science*. 2020;367(6483):1260-3.
63. Walls AC, Park YJ, Tortorici MA, Wall A, McGuire AT, Veesler D. Structure, Function, and Antigenicity of the SARS-CoV-2 Spike Glycoprotein. *Cell*. 2020;181(2):281-92 e6.
64. Khare S, Azevedo M, Parajuli P, Gokulan K. Conformational Changes of the Receptor Binding Domain of SARS-CoV-2 Spike Protein and Prediction of a B-Cell Antigenic Epitope Using Structural Data. *Front Artif Intell*. 2021;4:630955.
65. Lan J, Ge J, Yu J, Shan S, Zhou H, Fan S, et al. Structure of the SARS-CoV-2 spike receptor-binding domain bound to the ACE2 receptor. *Nature*. 2020;581(7807):215-20.
66. Millet JK, Whittaker GR. Host cell proteases: Critical determinants of coronavirus tropism and pathogenesis. *Virus Res*. 2015;202:120-34.
67. Hamming I, Timens W, Bulthuis ML, Lely AT, Navis G, van Goor H. Tissue distribution of ACE2 protein, the functional receptor for SARS coronavirus. A first step in understanding SARS pathogenesis. *J Pathol*. 2004;203(2):631-7.
68. Glowacka I, Bertram S, Muller MA, Allen P, Soilleux E, Pfefferle S, et al. Evidence that TMPRSS2 activates the severe acute respiratory syndrome coronavirus spike protein for membrane fusion and reduces viral control by the humoral immune response. *J Virol*. 2011;85(9):4122-34.
69. Zhao MM, Yang WL, Yang FY, Zhang L, Huang WJ, Hou W, et al. Cathepsin L plays a key role in SARS-CoV-2 infection in humans and humanized mice and is a promising target for new drug development. *Signal Transduct Target Ther*. 2021;6(1):134.
70. Hoffmann M, Kleine-Weber H, Schroeder S, Kruger N, Herrler T, Erichsen S, et al. SARS-CoV-2 Cell Entry Depends on ACE2 and TMPRSS2 and Is Blocked by a Clinically Proven Protease Inhibitor. *Cell*. 2020;181(2):271-80 e8.
71. Duchene S, Featherstone L, Haritopoulou-Sinanidou M, Rambaut A, Lemey P, Baele G. Temporal signal and the phylodynamic threshold of SARS-CoV-2. *Virus Evol*. 2020;6(2):veaa061.
72. Ecdc.europa.eu [Internet]. Methods for the detection and characterisation of SARS-CoV-2 variants - first update. European Centre for Disease Prevention and Control. [20 December 2021; cited 7 January 2022]. Available from: <https://www.ecdc.europa.eu/en/publications-data/methods-detection-and-characterisation-sars-cov-2-variants-first-update>
73. Cdc.gov [Internet]. COVID-19: About Variants. Centers for Disease Control and Prevention. [13 December 2021; cited 7 January 2022]. Available from: <https://www.cdc.gov/coronavirus/2019-ncov/variants/about-variants.html>
74. Imperial.ac.uk [Internet]. Report 50 - Hospitalisation risk for Omicron cases in England. Imperial College London, MRC Centre for Global Infectious Disease Analysis. [22 December

- 2021; cited 10 January 2022]. Available from: <https://www.imperial.ac.uk/mrc-global-infectious-disease-analysis/covid-19/report-50-severity-omicron/>
75. Gov.uk [Internet]. SARS-CoV-2 variants of concern and variants under investigation in England - Technical briefing 33. UK Health Security Agency. [23 December 2021; cited 10 January 2022]. Available from: [https://assets.publishing.service.gov.uk/government/uploads/system/uploads/attachment\\_data/file/1043807/technical-briefing-33.pdf](https://assets.publishing.service.gov.uk/government/uploads/system/uploads/attachment_data/file/1043807/technical-briefing-33.pdf)
76. Luna-Muschi A, Borges IC, de Faria E, Barboza AS, Maia FL, Leme MD, et al. Clinical features of COVID-19 by SARS-CoV-2 Gamma variant: A prospective cohort study of vaccinated and unvaccinated healthcare workers. *J Infect*. 2021.
77. Gov.uk [Internet]. Investigation of novel SARS-CoV-2 variant - Variant of Concern 202012/01 - Technical briefing 5. UK Health Security Agency (formerly Public Health England). [14 January 2021; cited 10 January 2022]. Available from: [https://assets.publishing.service.gov.uk/government/uploads/system/uploads/attachment\\_data/file/959426/Variant\\_of\\_Concern\\_VOC\\_202012\\_01\\_Technical\\_Briefing\\_5.pdf](https://assets.publishing.service.gov.uk/government/uploads/system/uploads/attachment_data/file/959426/Variant_of_Concern_VOC_202012_01_Technical_Briefing_5.pdf)
78. Wang Y, Liu M, Gao J. Enhanced receptor binding of SARS-CoV-2 through networks of hydrogen-bonding and hydrophobic interactions. *Proc Natl Acad Sci U S A*. 2020;117(25):13967-74.
79. Yi C, Sun X, Ye J, Ding L, Liu M, Yang Z, et al. Key residues of the receptor binding motif in the spike protein of SARS-CoV-2 that interact with ACE2 and neutralizing antibodies. *Cell Mol Immunol*. 2020;17(6):621-30.
80. Starr TN, Greaney AJ, Hilton SK, Ellis D, Crawford KHD, Dingens AS, et al. Deep Mutational Scanning of SARS-CoV-2 Receptor Binding Domain Reveals Constraints on Folding and ACE2 Binding. *Cell*. 2020;182(5):1295-310 e20.
81. Huang Y, Yang C, Xu XF, Xu W, Liu SW. Structural and functional properties of SARS-CoV-2 spike protein: potential antiviral drug development for COVID-19. *Acta Pharmacol Sin*. 2020;41(9):1141-9.
82. Hoffmann M, Kleine-Weber H, Pohlmann S. A Multibasic Cleavage Site in the Spike Protein of SARS-CoV-2 Is Essential for Infection of Human Lung Cells. *Mol Cell*. 2020;78(4):779-84 e5.
83. Peacock TP, Goldhill DH, Zhou J, Baillon L, Frise R, Swann OC, et al. The furin cleavage site of SARS-CoV-2 spike protein is a key determinant for transmission due to enhanced replication in airway cells. *BioRxiv [Preprint]*. 2020.
84. Zhu Y, Feng F, Hu G, Wang Y, Yu Y, Zhu Y, et al. The S1/S2 boundary of SARS-CoV-2 spike protein modulates cell entry pathways and transmission. *BioRxiv [Preprint]*. 2020.
85. Scudellari M. How the coronavirus infects cells - and why Delta is so dangerous. *Nature*. 2021;595(7869):640-4.
86. Wang Q, Qiu Y, Li JY, Zhou ZJ, Liao CH, Ge XY. A Unique Protease Cleavage Site Predicted in the Spike Protein of the Novel Pneumonia Coronavirus (2019-nCoV) Potentially Related to Viral Transmissibility. *Virol Sin*. 2020;35(3):337-9.
87. Yurkovetskiy L, Wang X, Pascal KE, Tomkins-Tinch C, Nyalile TP, Wang Y, et al. Structural and Functional Analysis of the D614G SARS-CoV-2 Spike Protein Variant. *Cell*. 2020;183(3):739-51 e8.
88. McCarthy KR, Rennick LJ, Nambulli S, Robinson-McCarthy LR, Bain WG, Haidar G, et al. Natural deletions in the SARS-CoV-2 spike glycoprotein drive antibody escape. *BioRxiv [Preprint]*. 2021.
89. Kemp SA, Collier DA, Datir R, Ferreira I, Gayed S, Jahun A, et al. Neutralising antibodies in Spike mediated SARS-CoV-2 adaptation. *MedRxiv [Preprint]*. 2020.



- 1
  - 2
  - 3
  - 4
  - 5
  - 6
  - 7
  - 8
  - 9
  - 10
  - 11
  - 12
  - 13
  - 14
  - 15
  - 16
  - 17
  - 18
  - 19
  - 20
  - 21
  - 22
  - 23
  - 24
  - 25
  - 26
  - 27
  - 28
  - 29
  - 30
  - 31
  - 32
  - 33
  - 34
  - 35
  - 36
  - 37
  - 38
  - 39
  - 40
  - 41
  - 42
  - 43
  - 44
  - 45
  - 46
  - 47
  - 48
  - 49
  - 50
  - 51
  - 52
  - 53
  - 54
  - 55
  - 56
  - 57
  - 58
  - 59
  - 60
90. Gamage AM, Tan KS, Chan WOY, Liu J, Tan CW, Ong YK, et al. Infection of human Nasal Epithelial Cells with SARS-CoV-2 and a 382-nt deletion isolate lacking ORF8 reveals similar viral kinetics and host transcriptional profiles. *PLoS Pathog.* 2020;16(12):e1009130.
91. Collier DA, De Marco A, Ferreira I, Meng B, Datir RP, Walls AC, et al. Sensitivity of SARS-CoV-2 B.1.1.7 to mRNA vaccine-elicited antibodies. *Nature.* 2021;593(7857):136-41.
92. Martínez-García L, Espinel MA, Abreu M, González-Alba JM, Gijón D, McGee A, et al. Emergence and Spread of B. 1.1. 7 Lineage in Primary Care and Clinical Impact in the Morbi-Mortality among Hospitalized Patients in Madrid, Spain. *Microorganisms.* 2021;9(7):1517.
93. Vassallo M, Manni S, Klotz C, Fabre R, Pini P, Blanchouin E, et al. Patients Admitted for Variant Alpha COVID-19 Have Poorer Outcomes than Those Infected with the Old Strain. *J Clin Med.* 2021;10(16).
94. McAlister FA, Nabipour M, Chu A, Lee DS, Saxinger L, Bakal JA. Lessons from the COVID-19 third wave in Canada: the impact of variants of concern and shifting demographics. *MedRxiv [Preprint].* 2021.
95. Davies NG, Abbott S, Barnard RC, Jarvis CI, Kucharski AJ, Munday JD, et al. Estimated transmissibility and impact of SARS-CoV-2 lineage B.1.1.7 in England. *Science.* 2021;372(6538).
96. Leung K, Shum MH, Leung GM, Lam TT, Wu JT. Early transmissibility assessment of the N501Y mutant strains of SARS-CoV-2 in the United Kingdom, October to November 2020. *Euro Surveill.* 2021;26(1).
97. Zhao S, Lou J, Cao L, Zheng H, Chong MKC, Chen Z, et al. Quantifying the transmission advantage associated with N501Y substitution of SARS-CoV-2 in the UK: an early data-driven analysis. *J Travel Med.* 2021;28(2).
98. Gov.uk [Internet]. NERVTAG paper on COVID-19 variant of concern B.1.1.7. NERVTAG - COVID-19 Public statements. [22 January 2021; cited 7 October 2021] Available from: [https://assets.publishing.service.gov.uk/government/uploads/system/uploads/attachment\\_data/file/961037/NERVTAG\\_note\\_on\\_B.1.1.7\\_severity\\_for\\_SAGE\\_77\\_\\_1\\_.pdf](https://assets.publishing.service.gov.uk/government/uploads/system/uploads/attachment_data/file/961037/NERVTAG_note_on_B.1.1.7_severity_for_SAGE_77__1_.pdf)
99. Challen R, Brooks-Pollock E, Read JM, Dyson L, Tsaneva-Atanasova K, Danon L. Risk of mortality in patients infected with SARS-CoV-2 variant of concern 202012/1: matched cohort study. *BMJ.* 2021;372:n579.
100. Paredes MI, Lunn SM, Famulare M, Frisbie LA, Painter I, Burstein R, et al. Associations between SARS-CoV-2 variants and risk of COVID-19 hospitalization among confirmed cases in Washington State: a retrospective cohort study. *MedRxiv [Preprint].* 2021.
101. Wang P, Nair MS, Liu L, Iketani S, Luo Y, Guo Y, et al. Antibody Resistance of SARS-CoV-2 Variants B.1.351 and B.1.1.7. *BioRxiv [Preprint].* 2021:2021.01.25.428137.
102. Wu K, Werner AP, Moliva JI, Koch M, Choi A, Stewart-Jones GBE, et al. mRNA-1273 vaccine induces neutralizing antibodies against spike mutants from global SARS-CoV-2 variants. *BioRxiv [Preprint].* 2021.
103. Gallais F, Gantner P, Bruel T, Velay A, Planas D, Wendling M-J, et al. Anti-SARS-CoV-2 Antibodies Persist for up to 13 Months and Reduce Risk of Reinfection. *MedRxiv [Preprint].* 2021.
104. Ecdc.europa.eu [Internet]. SARS-CoV-2 variants of concern as of 20 January 2022. European Centre for Disease Prevention and Control. [20 January 2022; cited 24 January 2022] Available from: <https://www.ecdc.europa.eu/en/covid-19/variants-concern>
105. Gu H, Chen Q, Yang G, He L, Fan H, Deng YQ, et al. Adaptation of SARS-CoV-2 in BALB/c mice for testing vaccine efficacy. *Science.* 2020;369(6511):1603-7.
106. Plante JA, Liu Y, Liu J, Xia H, Johnson BA, Lokugamage KG, et al. Spike mutation D614G alters SARS-CoV-2 fitness. *Nature.* 2021;592(7852):116-21.

- 1  
2  
3  
4  
5  
6  
7  
8  
9  
10  
11  
12  
13  
14  
15  
16  
17  
18  
19  
20  
21  
22  
23  
24  
25  
26  
27  
28  
29  
30  
31  
32  
33  
34  
35  
36  
37  
38  
39  
40  
41  
42  
43  
44  
45  
46  
47  
48  
49  
50  
51  
52  
53  
54  
55  
56  
57  
58  
59  
60
107. Pearson CA, Russell TW, Davies NG, Kucharski AJ, group CC-w, Edmunds WJ, et al. Estimates of severity and transmissibility of novel South Africa SARS-CoV-2 variant 501Y.V2. Centre for Mathematical Modelling of Infectious Diseases. CMMID Repository [Preprint]. 2021.
  108. Wibmer CK, Ayres F, Hermanus T, Madzivhandila M, Kgagudi P, Oosthuysen B, et al. SARS-CoV-2 501Y.V2 escapes neutralization by South African COVID-19 donor plasma. *Nat Med.* 2021;27(4):622-5.
  109. Sinha S, Tam B, Wang SM. Altered interaction between RBD and ACE2 receptor contributes towards the increased transmissibility of SARS CoV-2 delta, kappa, beta, and gamma strains with RBD double mutations. *BioRxiv* [Preprint]. 2021.
  110. Campbell F, Archer B, Laurenson-Schafer H, Jinnai Y, Konings F, Batra N, et al. Increased transmissibility and global spread of SARS-CoV-2 variants of concern as at June 2021. *Euro Surveill.* 2021;26(24).
  111. Ecdc.europa.eu [Internet]. Risk assessment: SARS-CoV-2 - increased circulation of variants of concern and vaccine rollout in the EU/EEA, 14th update. European Centre for Disease Prevention and Control. [15 February 2021; cited 8 October 2021] Available from: <https://www.ecdc.europa.eu/en/publications-data/covid-19-risk-assessment-variants-vaccine-fourteenth-update-february-2021>
  112. Khan A, Zia T, Suleman M, Khan T, Ali SS, Abbasi AA, et al. Higher infectivity of the SARS-CoV-2 new variants is associated with K417N/T, E484K, and N501Y mutants: An insight from structural data. *J Cell Physiol.* 2021;236(10):7045-57.
  113. Baum A, Fulton BO, Wloga E, Copin R, Pascal KE, Russo V, et al. Antibody cocktail to SARS-CoV-2 spike protein prevents rapid mutational escape seen with individual antibodies. *Science.* 2020;369(6506):1014-8.
  114. Curran J, Dol J, Boulos L, Somerville M, McCulloch H, MacDonald M, et al. Transmission characteristics of SARS-CoV-2 variants of concern. *MedRxiv* [Preprint]. 2021.
  115. de Faria E, Guedes AR, Oliveira MS, de Godoy Moreira MV, Maia FL, dos Santos Barboza A, et al. Performance of vaccination with CoronaVac in a cohort of healthcare workers (HCW) - preliminary report. *MedRxiv* [Preprint]. 2021.
  116. Freitas ARR, Beckedorff OA, Cavalcanti LPG, Siqueira AM, Castro DB, Costa CFD, et al. The emergence of novel SARS-CoV-2 variant P.1 in Amazonas (Brazil) was temporally associated with a change in the age and sex profile of COVID-19 mortality: A population based ecological study. *Lancet Reg Health Am.* 2021;1:100021.
  117. Funk T, Pharris A, Spiteri G, Bundle N, Melidou A, Carr M, et al. Characteristics of SARS-CoV-2 variants of concern B.1.1.7, B.1.351 or P.1: data from seven EU/EEA countries, weeks 38/2020 to 10/2021. *Euro Surveill.* 2021;26(16).
  118. Sabino EC, Buss LF, Carvalho MPS, Prete CA, Jr., Crispim MAE, Fraiji NA, et al. Resurgence of COVID-19 in Manaus, Brazil, despite high seroprevalence. *Lancet.* 2021;397(10273):452-5.
  119. Dejnirattisai W, Zhou D, Supasa P, Liu C, Mentzer AJ, Ginn HM, et al. Antibody evasion by the P.1 strain of SARS-CoV-2. *Cell.* 2021;184(11):2939-54 e9.
  120. Korber B, Fischer WM, Gnanakaran S, Yoon H, Theiler J, Abfalterer W, et al. Tracking Changes in SARS-CoV-2 Spike: Evidence that D614G Increases Infectivity of the COVID-19 Virus. *Cell.* 2020;182(4):812-27 e19.
  121. Volz E, Hill V, McCrone JT, Price A, Jorgensen D, O'Toole A, et al. Evaluating the Effects of SARS-CoV-2 Spike Mutation D614G on Transmissibility and Pathogenicity. *Cell.* 2021;184(1):64-75 e11.

- 1  
2  
3  
4  
5  
6  
7  
8  
9  
10  
11  
12  
13  
14  
15  
16  
17  
18  
19  
20  
21  
22  
23  
24  
25  
26  
27  
28  
29  
30  
31  
32  
33  
34  
35  
36  
37  
38  
39  
40  
41  
42  
43  
44  
45  
46  
47  
48  
49  
50  
51  
52  
53  
54  
55  
56  
57  
58  
59  
60
122. Augusto G, Mohsen MO, Zinkhan S, Liu X, Vogel M, Bachmann MF. In vitro data suggest that Indian delta variant B.1.617 of SARS-CoV-2 escapes neutralization by both receptor affinity and immune evasion. *Allergy*. 2021.
  123. Tchesnokova V, Kulakesara H, Larson L, Bowers V, Rechkina E, Kisiela D, et al. Acquisition of the L452R mutation in the ACE2-binding interface of Spike protein triggers recent massive expansion of SARS-Cov-2 variants. *BioRxiv [Preprint]*. 2021.
  124. Li Q, Wu J, Nie J, Zhang L, Hao H, Liu S, et al. The Impact of Mutations in SARS-CoV-2 Spike on Viral Infectivity and Antigenicity. *Cell*. 2020;182(5):1284-94 e9.
  125. Di Giacomo S, Mercatelli D, Rakhimov A, Giorgi FM. Preliminary report on severe acute respiratory syndrome coronavirus 2 (SARS-CoV-2) Spike mutation T478K. *J Med Virol*. 2021;93(9):5638-43.
  126. Torjesen I. Covid-19: Delta variant is now UK's most dominant strain and spreading through schools. *BMJ*. 2021;373:n1445.
  127. Reuters.com [Internet]. Delta COVID variant now dominant strain worldwide, U.S. deaths surge -officials. O'donnell C, Mason J, Reuters. [16 July 2021; cited 6 January 2022]. Available from: [www.reuters.com](http://www.reuters.com)
  128. Euro.who.int [Internet]. SARS-CoV-2 Delta variant now dominant in much of European region; efforts must be reinforced to prevent transmission, warns WHO Regional Office for Europe and ECDC. World Health Organisation. [23 July 2021; cited 11 October 2021]. Available from: <https://www.euro.who.int/en/media-centre/sections/press-releases/2021/sars-cov-2-delta-variant-now-dominant-in-much-of-european-region-efforts-must-be-reinforced-to-prevent-transmission,-warns-who-regional-office-for-europe-and-ecdc>
  129. Li B, Deng A, Li K, Hu Y, Li Z, Xiong Q, et al. Viral infection and transmission in a large, well-traced outbreak caused by the SARS-CoV-2 Delta variant *MedRxiv [Preprint]*. 2021.
  130. Teyssou E, Delagreverie H, Visseaux B, Lambert-Niclot S, Brichler S, Ferre V, et al. The Delta SARS-CoV-2 variant has a higher viral load than the Beta and the historical variants in nasopharyngeal samples from newly diagnosed COVID-19 patients. *J Infect*. 2021;83(4):e1-e3.
  131. Kumar A, Asghar A, Raza K, Narayan RK, Jha RK, Satyam A, et al. Demographic characteristics of SARS-CoV-2 B.1.617.2 (Delta) variant infections in Indian population. *MedRxiv [Preprint]*. 2021.
  132. Planas D, Veyer D, Baidaliuk A, Staropoli I, Guivel-Benhassine F, Rajah MM, et al. Reduced sensitivity of SARS-CoV-2 variant Delta to antibody neutralization. *Nature*. 2021;596(7871):276-80.
  133. Sheikh A, McMenamain J, Taylor B, Robertson C, Public Health S, the EIIC. SARS-CoV-2 Delta VOC in Scotland: demographics, risk of hospital admission, and vaccine effectiveness. *Lancet*. 2021;397(10293):2461-2.
  134. Fisman DN, Tuite AR. Progressive Increase in Virulence of Novel SARS-CoV-2 Variants in Ontario, Canada. *MedRxiv [Preprint]*. 2021.
  135. Cameroni E, Saliba C, Bowen JE, Rosen LE, Culap K, Pinto D, et al. Broadly neutralizing antibodies overcome SARS-CoV-2 Omicron antigenic shift. *BioRxiv [Preprint]*. 2021.
  136. Shah M, Woo HG. Omicron: A heavily mutated SARS-CoV-2 variant exhibits stronger binding to ACE2 and potently escape approved COVID-19 therapeutic antibodies. *BioRxiv [Preprint]*. 2021.
  137. Wolter N, Jassat W, Walaza S, Welch R, Moultrie H, Groome M, et al. Early assessment of the clinical severity of the SARS-CoV-2 Omicron variant in South Africa. *MedRxiv [Preprint]*. 2021.
  138. Gov.uk [Internet]. Omicron daily overview: 24 December 2021. UK Health Security Agency. [24 December 2021; cited 4 January 2022]. Available from:

- 1  
2  
3 [https://assets.publishing.service.gov.uk/government/uploads/system/uploads/attachment\\_data/file/1043866/20211224\\_OS\\_Daily\\_Omicron\\_Overview.pdf](https://assets.publishing.service.gov.uk/government/uploads/system/uploads/attachment_data/file/1043866/20211224_OS_Daily_Omicron_Overview.pdf)
- 4  
5  
6 139. Who.int [Internet]. Enhancing readiness for Omicron (B.1.1.529): Technical brief and  
7 priority actions for Member States. World Health Organisation. [23 December 2021; cited 4  
8 January 2022]. Available from: [https://www.who.int/docs/default-source/coronaviruse/2021-12-23-global-technical-brief-and-priority-action-on-omicron.pdf?sfvrsn=d0e9fb6c\\_8](https://www.who.int/docs/default-source/coronaviruse/2021-12-23-global-technical-brief-and-priority-action-on-omicron.pdf?sfvrsn=d0e9fb6c_8)
- 9  
10  
11  
12 140. Med.hku.hk [Internet]. HKUMed finds Omicron SARS-CoV-2 can infect faster and  
13 better than Delta in human bronchus but with less severe infection in lung. The University of  
14 Hong Kong, LKS Faculty of Medicine. [15 December 2021; cited 5 January 2022]. Available  
15 from: <https://www.med.hku.hk/en/news/press/20211215-omicron-sars-cov-2-infection>
- 16  
17 141. Sheikh A, Kerr S, Woolhouse M, McMenamin J, C. R. Severity of Omicron variant of  
18 concern and vaccine effectiveness against symptomatic disease: national cohort with nested  
19 test negative design study in Scotland. 2021.
- 20  
21 142. Pulliam JRC, van Schalkwyk C, Govender N, von Gottberg A, Cohen C, Groome MJ, et  
22 al. Increased risk of SARS-CoV-2 reinfection associated with emergence of the Omicron variant  
23 in South Africa. MedRxiv [Preprint]. 2021.
- 24  
25 143. Sandile Cele, Laurelle Jackson, Khadija Khan, David Khoury, Thandeka Moyo-Gwete,  
26 Houriyah Tegally, et al. SARS-CoV-2 Omicron has extensive but incomplete escape of Pfizer  
27 BNT162b2 elicited neutralization and requires ACE2 for infection. MedRxiv [Preprint]. 2021.
- 28  
29 144. Planas D, Saunders N, Maes P, Guivel-Benhassine F, Planchais C, Buchrieser J, et al.  
30 Considerable escape of SARS-CoV-2 variant Omicron to antibody neutralization. BioRxiv  
31 [Preprint]. 2021.
- 32  
33 145. Meng B, Ferreira IATM, Abdullahi A, Saito A, Kimura I, Yamasoba D, et al. SARS-CoV-2  
34 Omicron spike mediated immune escape, infectivity and cell-cell fusion. BioRxiv [Preprint].  
35 2021.
- 36  
37 146. Pfizer.com [Internet]. Pfizer and BioNTech Provide Update on Omicron Variant. Pfizer.  
38 [8 December 2021; cited 4 January 2022]. Available from:  
39 <https://www.pfizer.com/news/press-release/press-release-detail/pfizer-and-biontech-provide-update-omicron-variant>
- 40  
41 147. Keeton R, Tincho MB, Ngomti A, Baguma R, Benede N, Suzuki A, et al. SARS-CoV-2  
42 spike T cell responses induced upon vaccination or infection remain robust against Omicron.  
43 MedRxiv [Preprint]. 2021.
- 44  
45 148. Sacoronavirus.co.za [Internet]. Cabinet approves changes to covid-19 regulations.  
46 South Africa Department of Health. [30 December 2021; cited 7 January 2022]. Available from:  
47 <https://sacoronavirus.co.za/2021/12/30/media-release-cabinet-approves-changes-to-covid-19-regulations/>
- 48  
49 149. Taylor L. Covid-19: Omicron drives weekly record high in global infections. BMJ.  
50 2022;376:o66.
- 51  
52 150. Tada T, Zhou H, Dcosta BM, Samanovic MI, Mulligan MJ, Landau NR. SARS-CoV-2  
53 Lambda Variant Remains Susceptible to Neutralization by mRNA Vaccine-elicited Antibodies  
54 and Convalescent Serum. BioRxiv [Preprint]. 2021.
- 55  
56 151. Acevedo ML, Alonso-Palomares L, Bustamante A, Gaggero A, Paredes F, Cortés CP, et  
57 al. Infectivity and immune escape of the new SARS-CoV-2 variant of interest Lambda. MedRxiv  
58 [Preprint]. 2021.
- 59  
60 152. Laiton-Donato K, Franco-Munoz C, Alvarez-Diaz DA, Ruiz-Moreno HA, Usme-Ciro JA,  
Prada DA, et al. Characterization of the emerging B.1.621 variant of interest of SARS-CoV-2.  
Infect Genet Evol. 2021;95:105038.

153. Chen J, Gao K, Wang R, Wei GW. Revealing the Threat of Emerging SARS-CoV-2 Mutations to Antibody Therapies. *J Mol Biol.* 2021;433(18):167155.
154. Amanat F, Krammer F. SARS-CoV-2 vaccines: status report. *Immunity.* 2020;52(4):583-9.
155. [dataset] Who.int. COVID-19 vaccine tracker and landscape. World Health Organisation. [25 January 2022; cited 26 January 2022]. Available from: <https://www.who.int/publications/m/item/draft-landscape-of-covid-19-candidate-vaccines>
156. Polack FP, Thomas SJ, Kitchin N, Absalon J, Gurtman A, Lockhart S, et al. Safety and Efficacy of the BNT162b2 mRNA Covid-19 Vaccine. *N Engl J Med.* 2020;383(27):2603-15.
157. Wrapp D, Wang N, Corbett KS, Goldsmith JA, Hsieh C-L, Abiona O, et al. Cryo-EM structure of the 2019-nCoV spike in the prefusion conformation. *Science.* 2020;367(6483):1260-3.
158. Who.int [Internet]. Coronavirus disease (COVID-19): Vaccines. World Health Organisation. [20 January 2022; cited 26 January 2022]. Available from: [https://www.who.int/news-room/questions-and-answers/item/coronavirus-disease-\(covid-19\)-vaccines](https://www.who.int/news-room/questions-and-answers/item/coronavirus-disease-(covid-19)-vaccines)
159. Sahin U, Muik A, Vogler I, Derhovanessian E, Kranz LM, Vormehr M, et al. BNT162b2 vaccine induces neutralizing antibodies and poly-specific T cells in humans. *Nature.* 2021;595(7868):572-7.
160. Arunachalam PS, Scott MKD, Hagan T, Li C, Feng Y, Wimmers F, et al. Systems vaccinology of the BNT162b2 mRNA vaccine in humans. *Nature.* 2021;596(7872):410-6.
161. Walsh EE, Frenck RW, Jr., Falsey AR, Kitchin N, Absalon J, Gurtman A, et al. Safety and Immunogenicity of Two RNA-Based Covid-19 Vaccine Candidates. *N Engl J Med.* 2020;383(25):2439-50.
162. Appelman B, van der Straten K, Lavell AHA, Schinkel M, Slim MA, Poniman M, et al. Time since SARS-CoV-2 infection and humoral immune response following BNT162b2 mRNA vaccination. *EBioMedicine.* 2021;72:103589.
163. Beatty AL, Peyser ND, Butcher XE, Cocohoba JM, Lin F, Olgin JE, et al. Analysis of COVID-19 Vaccine Type and Adverse Effects Following Vaccination. *JAMA Netw Open.* 2021;4(12):e2140364.
164. Vizcarra P, Haemmerle J, Velasco H, Velasco T, Fernandez-Escribano M, Vallejo A, et al. BNT162b2 mRNA COVID-19 vaccine Reactogenicity: The key role of immunity. *Vaccine.* 2021;39(51):7367-74.
165. Salmeron Rios S, Mas Romero M, Cortes Zamora EB, Tabernero Sahuquillo MT, Romero Rizos L, Sanchez-Jurado PM, et al. Immunogenicity of the BNT162b2 vaccine in frail or disabled nursing home residents: COVID-A study. *J Am Geriatr Soc.* 2021;69(6):1441-7.
166. Barda N, Dagan N, Ben-Shlomo Y, Kepten E, Waxman J, Ohana R, et al. Safety of the BNT162b2 mRNA Covid-19 Vaccine in a Nationwide Setting. *N Engl J Med.* 2021;385(12):1078-90.
167. Sharma O, Sultan AA, Ding H, Triggler CR. A Review of the Progress and Challenges of Developing a Vaccine for COVID-19. *Front Immunol.* 2020;11:585354.
168. Who.int [Internet]. WHO lists two additional COVID-19 vaccines for emergency use and COVAX roll-out. World Health Organisation. [15 February 2021; cited 13 October 2021]. Available from: <https://www.who.int/news/item/15-02-2021-who-lists-two-additional-covid-19-vaccines-for-emergency-use-and-covax-roll-out>
169. Ewer KJ, Barrett JR, Belij-Rammerstorfer S, Sharpe H, Makinson R, Morter R, et al. T cell and antibody responses induced by a single dose of ChAdOx1 nCoV-19 (AZD1222) vaccine in a phase 1/2 clinical trial. *Nat Med.* 2021;27(2):270-8.

170. Folegatti PM, Ewer KJ, Aley PK, Angus B, Becker S, Belij-Rammerstorfer S, et al. Safety and immunogenicity of the ChAdOx1 nCoV-19 vaccine against SARS-CoV-2: a preliminary report of a phase 1/2, single-blind, randomised controlled trial. *Lancet*. 2020;396(10249):467-78.
171. Al Khames Aga QA, Alkhaffaf WH, Hatem TH, Nassir KF, Batineh Y, Dahham AT, et al. Safety of COVID-19 vaccines. *J Med Virol*. 2021;93(12):6588-94.
172. Sadoff J, Gray G, Vandebosch A, Cardenas V, Shukarev G, Grinsztejn B, et al. Safety and Efficacy of Single-Dose Ad26.COV2.S Vaccine against Covid-19. *N Engl J Med*. 2021;384(23):2187-201.
173. Alter G, Yu J, Liu J, Chandrashekar A, Borducchi EN, Tostanoski LH, et al. Immunogenicity of Ad26.COV2.S vaccine against SARS-CoV-2 variants in humans. *Nature*. 2021;596(7871):268-72.
174. Sadoff J, Le Gars M, Shukarev G, Heerwegh D, Truyers C, de Groot AM, et al. Interim Results of a Phase 1-2a Trial of Ad26.COV2.S Covid-19 Vaccine. *N Engl J Med*. 2021;384(19):1824-35.
175. Keeton R, Richardson SI, Moyo-Gwete T, Hermanus T, Tincho MB, Benede N, et al. Prior infection with SARS-CoV-2 boosts and broadens Ad26.COV2.S immunogenicity in a variant-dependent manner. *Cell Host Microbe*. 2021;29(11):1611-9 e5.
176. See I, Su JR, Lale A, Woo EJ, Guh AY, Shimabukuro TT, et al. US Case Reports of Cerebral Venous Sinus Thrombosis With Thrombocytopenia After Ad26.COV2.S Vaccination, March 2 to April 21, 2021. *JAMA*. 2021;325(24):2448-56.
177. Baden LR, El Sahly HM, Essink B, Kotloff K, Frey S, Novak R, et al. Efficacy and Safety of the mRNA-1273 SARS-CoV-2 Vaccine. *N Engl J Med*. 2021;384(5):403-16.
178. Mukhopadhyay L, Yadav PD, Gupta N, Mohandas S, Patil DY, Shete-Aich A, et al. Comparison of the immunogenicity & protective efficacy of various SARS-CoV-2 vaccine candidates in non-human primates. *Indian J Med Res*. 2021;153(1 & 2):93-114.
179. Anderson EJ, Rouphael NG, Widge AT, Jackson LA, Roberts PC, Makhene M, et al. Safety and Immunogenicity of SARS-CoV-2 mRNA-1273 Vaccine in Older Adults. *N Engl J Med*. 2020;383(25):2427-38.
180. Jackson LA, Anderson EJ, Rouphael NG, Roberts PC, Makhene M, Coler RN, et al. An mRNA Vaccine against SARS-CoV-2 - Preliminary Report. *N Engl J Med*. 2020;383(20):1920-31.
181. Chu L, McPhee R, Huang W, Bennett H, Pajon R, Nestorova B, et al. A preliminary report of a randomized controlled phase 2 trial of the safety and immunogenicity of mRNA-1273 SARS-CoV-2 vaccine. *Vaccine*. 2021;39(20):2791-9.
182. Who.int [Internet]. Interim recommendations for use of the inactivated COVID-19 vaccine BIBP developed by China National Biotec Group (CNBG), Sinopharm. World Health Organisation. [28 October 2021; cited 7 January 2022]. Available from: <https://www.who.int/publications/i/item/WHO-2019-nCoV-vaccines-SAGE-recommendation-BIBP>
183. Who.int [Internet]. Background document on the inactivated vaccine Sinovac-CoronaVac against COVID-19. World Health Organisation. [1 June 2021; cited 13 October 2021]. Available from: [https://www.who.int/publications/i/item/WHO-2019-nCoV-vaccines-SAGE\\_recommendation-Sinovac-CoronaVac-background-2021.1](https://www.who.int/publications/i/item/WHO-2019-nCoV-vaccines-SAGE_recommendation-Sinovac-CoronaVac-background-2021.1)
184. Who.int [Internet]. Background document on the Bharat Biotech BBV152 COVAXIN® (COVID-19) vaccine. World Health Organisation. [3 November 2021; cited 7 January 2022]. Available from: <https://www.who.int/publications/i/item/WHO-2019-nCoV-vaccines-SAGE-recommendation-bbv152-covaxin-background>

- 1  
2  
3  
4  
5  
6  
7  
8  
9  
10  
11  
12  
13  
14  
15  
16  
17  
18  
19  
20  
21  
22  
23  
24  
25  
26  
27  
28  
29  
30  
31  
32  
33  
34  
35  
36  
37  
38  
39  
40  
41  
42  
43  
44  
45  
46  
47  
48  
49  
50  
51  
52  
53  
54  
55  
56  
57  
58  
59  
60
185. Who.int [Internet]. WHO issues emergency use listing for eighth COVID-19 vaccine. World Health Organisation. [3 November 2021; cited 7 January 2022]. Available from: <https://www.who.int/news/item/03-11-2021-who-issues-emergency-use-listing-for-eighth-covid-19-vaccine>
  186. Who.int [Internet]. WHO lists 9th COVID-19 vaccine for emergency use with aim to increase access to vaccination in lower-income countries. World Health Organisation. [17 December 2021; cited 7 January 2022]. Available from: <https://www.who.int/news/item/17-12-2021-who-lists-9th-covid-19-vaccine-for-emergency-use-with-aim-to-increase-access-to-vaccination-in-lower-income-countries>
  187. Who.int [Internet]. WHO lists 10th COVID-19 vaccine for emergency use: Nuvaxovid. World Health Organisation. [21 December 2021; cited 7 January 2022]. Available from: <https://www.who.int/news/item/21-12-2021-who-lists-10th-covid-19-vaccine-for-emergency-use-nuvaxovid>
  188. Who.int [Internet]. Interim recommendations for use of the Novavax NVX-CoV2373 vaccine against COVID-19. World Health Organisation. [20 December 2021; cited 7 January 2022]. Available from: <https://www.who.int/publications/i/item/WHO-2019-nCoV-vaccines-SAGE-recommendation-novavax-nvx-cov2373>
  189. Mishra SK, Pradhan SK, Pati S, Sahu S, Nanda RK. Waning of Anti-spike Antibodies in AZD1222 (ChAdOx1) Vaccinated Healthcare Providers: A Prospective Longitudinal Study. *Cureus*. 2021;13(11):e19879.
  190. Tre-Hardy M, Cupaiolo R, Wilmet A, Antoine-Moussiaux T, Della Vecchia A, Horeanga A, et al. Immunogenicity of mRNA-1273 COVID vaccine after 6 months surveillance in health care workers; a third dose is necessary. *J Infect*. 2021;83(5):559-64.
  191. Shrotri M, Navaratnam AMD, Nguyen V, Byrne T, Geismar C, Fragaszy E, et al. Spike-antibody waning after second dose of BNT162b2 or ChAdOx1. *Lancet*. 2021;398(10298):385-7.
  192. Chemaitelly H, Tang P, Hasan MR, AlMukdad S, Yassine HM, Benslimane FM, et al. Waning of BNT162b2 Vaccine Protection against SARS-CoV-2 Infection in Qatar. *N Engl J Med*. 2021.
  193. Mizrahi B, Lotan R, Kalkstein N, Peretz A, Perez G, Ben-Tov A, et al. Correlation of SARS-CoV-2 Breakthrough Infections to Time-from-vaccine; Preliminary Study. *MedRxiv [Preprint]*. 2021.
  194. Thomas SJ, Moreira ED, Kitchin N, Absalon J, Gurtman A, Lockhart S, et al. Six Month Safety and Efficacy of the BNT162b2 mRNA COVID-19 Vaccine. *MedRxiv [Preprint]*. 2021.
  195. Tre-Hardy M, Cupaiolo R, Wilmet A, Antoine-Moussiaux T, Della Vecchia A, Horeanga A, et al. Six-month interim analysis of ongoing immunogenicity surveillance of the mRNA-1273 vaccine in healthcare workers: A third dose is expected. *J Infect*. 2021.
  196. Almendro-Vazquez P, Laguna-Goya R, Ruiz-Ruigomez M, Utrero-Rico A, Lalueza A, Maestro de la Calle G, et al. Longitudinal dynamics of SARS-CoV-2-specific cellular and humoral immunity after natural infection or BNT162b2 vaccination. *PLoS Pathog*. 2021;17(12):e1010211.
  197. Cohen KW, Linderman SL, Moodie Z, Czartoski J, Lai L, Mantus G, et al. Longitudinal analysis shows durable and broad immune memory after SARS-CoV-2 infection with persisting antibody responses and memory B and T cells. *Cell Rep Med*. 2021;2(7):100354.
  198. Zeng G, Wu Q, Pan H, Li M, Yang J, Wang L, et al. Immunogenicity and safety of a third dose of CoronaVac, and immune persistence of a two-dose schedule, in healthy adults: interim results from two single-centre, double-blind, randomised, placebo-controlled phase 2 clinical trials. *Lancet Infect Dis*. 2021.

199. Choi A, Koch M, Wu K, Chu L, Ma L, Hill A, et al. Safety and immunogenicity of SARS-CoV-2 variant mRNA vaccine boosters in healthy adults: an interim analysis. *Nat Med*. 2021.
200. Flaxman A, Marchevsky NG, Jenkin D, Aboagye J, Aley PK, Angus B, et al. Reactogenicity and immunogenicity after a late second dose or a third dose of ChAdOx1 nCoV-19 in the UK: a substudy of two randomised controlled trials (COV001 and COV002). *Lancet*. 2021;398(10304):981-90.
201. Iketani S, Liu L, Nair MS, Mohri H, Wang M, Huang Y, et al. A third COVID-19 vaccine shot markedly boosts neutralizing antibody potency and breadth *MedRxiv [Preprint]*. 2021.
202. Garcia-Beltran WF, St Denis KJ, Hoelzemer A, Lam EC, Nitido AD, Sheehan ML, et al. mRNA-based COVID-19 vaccine boosters induce neutralizing immunity against SARS-CoV-2 Omicron variant. *MedRxiv [Preprint]*. 2021.
203. Yorsaeng R, Suntronwong N, Phowatthanasathian H, Assawakosri S, Kanokudom S, Thongmee T, et al. Immunogenicity of a third dose viral-vectored COVID-19 vaccine after receiving two-dose inactivated vaccines in healthy adults. *Vaccine*. 2022;40(3):524-30.
204. Munro APS, Janani L, Cornelius V, Aley PK, Babbage G, Baxter D, et al. Safety and immunogenicity of seven COVID-19 vaccines as a third dose (booster) following two doses of ChAdOx1 nCov-19 or BNT162b2 in the UK (COV-BOOST): a blinded, multicentre, randomised, controlled, phase 2 trial. *Lancet*. 2021;398(10318):2258-76.
205. Madelon N, Heikkilä N, Sabater Royo I, Fontannaz P, Breville G, Lauper K, et al. Omicron-specific cytotoxic T-cell responses are boosted following a third dose of mRNA COVID-19 vaccine in anti-CD20-treated multiple sclerosis patients *MedRxiv [Preprint]*. 2021.
206. Bar-On YM, Goldberg Y, Mandel M, Bodenheimer O, Freedman L, Kalkstein N, et al. Protection of BNT162b2 Vaccine Booster against Covid-19 in Israel. *N Engl J Med*. 2021;385(15):1393-400.
207. Barda N, Dagan N, Cohen C, Hernan MA, Lipsitch M, Kohane IS, et al. Effectiveness of a third dose of the BNT162b2 mRNA COVID-19 vaccine for preventing severe outcomes in Israel: an observational study. *Lancet*. 2021;398(10316):2093-100.
208. Arbel R, Hammerman A, Sergienko R, Friger M, Peretz A, Netzer D, et al. BNT162b2 Vaccine Booster and Mortality Due to Covid-19. *N Engl J Med*. 2021;385(26):2413-20.
209. Spitzer A, Angel Y, Marudi O, Zeltser D, Saiag E, Goldshmidt H, et al. Association of a Third Dose of BNT162b2 Vaccine With Incidence of SARS-CoV-2 Infection Among Health Care Workers in Israel. *JAMA*. 2022.
210. Bar-On YM, Goldberg Y, Mandel M, Bodenheimer O, Freedman L, Alroy-Preis S, et al. Protection against Covid-19 by BNT162b2 Booster across Age Groups. *N Engl J Med*. 2021;385(26):2421-30.
211. Levine-Tiefenbrun M, Yelin I, Alapi H, Katz R, Herzel E, Kuint J, et al. Viral loads of Delta-variant SARS-CoV-2 breakthrough infections after vaccination and booster with BNT162b2. *Nat Med*. 2021;27(12):2108-10.
212. Andrews N, Stowe J, Kirsebom F, Toffa S, Rickeard T, Gallagher E, et al. Effectiveness of COVID-19 vaccines against the Omicron (B.1.1.529) variant of concern. *medRxiv [Preprint]*. 2021.
213. Hansen CH, Schelde AB, Moustsen-Helm IR, Emborg H-D, Krause TG, Mølbak K, et al. Vaccine effectiveness against SARS-CoV-2 infection with the Omicron or Delta variants following a two-dose or booster BNT162b2 or mRNA-1273 vaccination series: A Danish cohort study *MedRxiv [Preprint]*. 2021.
214. Lusvardi S, Pollett SD, Neerukonda SN, Wang W, Wang R, Vassell R, et al. SARS-CoV-2 Omicron neutralization by therapeutic antibodies, convalescent sera, and post-mRNA vaccine booster. *BioRxiv [Preprint]*. 2021.



- 1  
2  
3  
4  
5  
6  
7  
8  
9  
10  
11  
12  
13  
14  
15  
16  
17  
18  
19  
20  
21  
22  
23  
24  
25  
26  
27  
28  
29  
30  
31  
32  
33  
34  
35  
36  
37  
38  
39  
40  
41  
42  
43  
44  
45  
46  
47  
48  
49  
50  
51  
52  
53  
54  
55  
56  
57  
58  
59  
60
215. Cdc.gov [Internet]. CDC Recommends Pfizer Booster at 5 Months, Additional Primary Dose for Certain Immunocompromised Children. Centers for Disease Control and Prevention. [4 January 2022; cited 7 January 2022]. Available from: <https://www.cdc.gov/media/releases/2022/s0104-Pfizer-Booster.html>
  216. Wu K, Choi A, Koch M, Elbashir S, Ma L, Lee D, et al. Variant SARS-CoV-2 mRNA vaccines confer broad neutralization as primary or booster series in mice. *Vaccine*. 2021;39(51):7394-400.
  217. Covid19-trials.com [Internet]. Global Coronavirus COVID-19 Clinical Trial Tracker. Cytel Inc. [cited 12 January 2022]. Available from: <https://www.covid19-trials.com/>
  218. Gov.uk [Internet]. First oral antiviral for COVID-19, Lagevrio (molnupiravir), approved by MHRA. Medicines and Healthcare products Regulatory Agency. [4 November 2021; cited 12 January 2022]. Available from: <https://www.gov.uk/government/news/first-oral-antiviral-for-covid-19-lagevrio-molnupiravir-approved-by-mhra>
  219. Gov.uk [Internet]. Oral COVID-19 antiviral, Paxlovid, approved by UK regulator. Medicines and Healthcare products Regulatory Agency. [31 December 2021; cited 12 January 2022]. Available from: <https://www.gov.uk/government/news/oral-covid-19-antiviral-paxlovid-approved-by-uk-regulator>
  220. Fda.gov [Internet]. Coronavirus (COVID-19) Update: FDA Authorizes Additional Oral Antiviral for Treatment of COVID-19 in Certain Adults. U.S. Food and Drug Administration. [23 December 2021; cited 12 January 2022]. Available from: <https://www.fda.gov/news-events/press-announcements/coronavirus-covid-19-update-fda-authorizes-additional-oral-antiviral-treatment-covid-19-certain>
  221. Fda.gov [Internet]. Coronavirus (COVID-19) Update: FDA Authorizes First Oral Antiviral for Treatment of COVID-19. U.S. Food and Drug Administration. [22 December 2021; cited 12 January 2022]. Available from: <https://www.fda.gov/news-events/press-announcements/coronavirus-covid-19-update-fda-authorizes-first-oral-antiviral-treatment-covid-19>
  222. ema.europa.eu [Internet]. EMA issues advice on use of Lagevrio (molnupiravir) for the treatment of COVID-19. European Medicines Agency. [19 November 2021.; cited 12 January 2022]. Available from: <https://www.ema.europa.eu/en/news/ema-issues-advice-use-lagevrio-molnupiravir-treatment-covid-19>
  223. ema.europa.eu [Internet]. EMA issues advice on use of Paxlovid (PF-07321332 and ritonavir) for the treatment of COVID-19: rolling review starts in parallel. European Medicines Agency. [16 December 2021.; cited 12 January 2022]. Available from: <https://www.ema.europa.eu/en/news/ema-issues-advice-use-paxlovid-pf-07321332-ritonavir-treatment-covid-19-rolling-review-starts>
  224. Gov.uk [Internet]. MHRA approves Xevudy (sotrovimab), a COVID-19 treatment found to cut hospitalisation and death by 79%. Medicines and Healthcare products Regulatory Agency. [2 December 2021; cited 12 January 2022]. Available from: [https://www.gov.uk/government/news/mhra-approves-xevudy-sotrovimab-a-covid-19-treatment-found-to-cut-hospitalisation-and-death-by-79#:~:text=and%20licensing%20guidance-,MHRA%20approves%20Xevudy%20\(sotrovimab\)%2C%20a%20COVID%2D19%20treatment,risk%20of%20developing%20severe%20disease.](https://www.gov.uk/government/news/mhra-approves-xevudy-sotrovimab-a-covid-19-treatment-found-to-cut-hospitalisation-and-death-by-79#:~:text=and%20licensing%20guidance-,MHRA%20approves%20Xevudy%20(sotrovimab)%2C%20a%20COVID%2D19%20treatment,risk%20of%20developing%20severe%20disease.)
  225. Fda.gov [Internet]. Coronavirus (COVID-19) Update: FDA Authorizes Additional Monoclonal Antibody for Treatment of COVID-19. U.S. Food and Drug Administration. [26 May 2021; cited 12 January 2022]. Available from: <https://www.fda.gov/news-events/press->

- announcements/coronavirus-covid-19-update-fda-authorizes-additional-monoclonal-antibody-treatment-covid-19
226. [ema.europa.eu](https://www.ema.europa.eu/en/news/covid-19-ema-recommends-authorisation-antibody-medicine-xevudy#:~:text=EMA's%20human%20medicines%20committee%20(CHMP,medicine%20together%20with%20Vir%20Biotechnology.) [Internet]. COVID-19: EMA recommends authorisation of antibody medicine Xevudy. European Medicines Agency. [16 December 2021.; cited 12 January 2022]. Available from: [https://www.ema.europa.eu/en/news/covid-19-ema-recommends-authorisation-antibody-medicine-xevudy#:~:text=EMA's%20human%20medicines%20committee%20\(CHMP,medicine%20together%20with%20Vir%20Biotechnology.](https://www.ema.europa.eu/en/news/covid-19-ema-recommends-authorisation-antibody-medicine-xevudy#:~:text=EMA's%20human%20medicines%20committee%20(CHMP,medicine%20together%20with%20Vir%20Biotechnology.)
227. [Who.int](https://www.who.int/publications/i/item/WHO-2019-nCoV-therapeutics-2022.1) [Internet]. Therapeutics and COVID-19: living guideline. World Health Organisation. [14 January 2022; cited 21 January 2022] Available from: <https://www.who.int/publications/i/item/WHO-2019-nCoV-therapeutics-2022.1>
228. [Nice.org.uk](https://www.nice.org.uk/guidance/ng191) [Internet]. COVID-19 rapid guideline: managing COVID-19 NICE guideline [NG191]. National Institute for Health and Care Excellence. [16 December 2021; cited 21 January 2022]. Available from: <https://www.nice.org.uk/guidance/ng191>
229. [Gov.uk](https://www.gov.uk/government/collections/mhra-guidance-on-coronavirus-covid-19) [Internet]. MHRA guidance on coronavirus (COVID-19). Medicines and Healthcare products Regulatory Agency. [16 September 2021; cited 21 January 2022]. Available from: <https://www.gov.uk/government/collections/mhra-guidance-on-coronavirus-covid-19>
230. [ecdc.europa.eu](https://www.ecdc.europa.eu/en/covid-19/all-reports-covid-19) [Internet]. All resources on COVID-19 – Guidance and technical reports. [2022; cited 21 January 2022]. Available from: <https://www.ecdc.europa.eu/en/covid-19/all-reports-covid-19>
231. [Nih.gov](https://www.covid19treatmentguidelines.nih.gov/) [Internet]. Coronavirus Disease 2019 (COVID-19) Treatment Guidelines. National Institutes of Health [19 January 2022; cited 21 January 2022]. Available from: <https://www.covid19treatmentguidelines.nih.gov/>
232. [Cdc.gov](https://www.cdc.gov/coronavirus/2019-ncov/communication/guidance.html) [Internet]. Guidance for COVID-19. Centers for Disease Control and Prevention. [15 March 2021; cited 21 January 2022]. Available from: <https://www.cdc.gov/coronavirus/2019-ncov/communication/guidance.html>
233. Blundell R, Costa Dias M, Joyce R, Xu X. COVID-19 and Inequalities. *Fisc Stud.* 2020.
234. Chadeau-Hyam M, Bodinier B, Elliott J, Whitaker MD, Tzoulaki I, Vermeulen R, et al. Risk factors for positive and negative COVID-19 tests: a cautious and in-depth analysis of UK biobank data. *Int J Epidemiol.* 2020;49(5):1454-67.
235. Patel JA, Nielsen FBH, Badiani AA, Assi S, Unadkat VA, Patel B, et al. Poverty, inequality and COVID-19: the forgotten vulnerable. *Public Health.* 2020;183:110-1.
236. Cohen J, Rodgers YVM. Contributing factors to personal protective equipment shortages during the COVID-19 pandemic. *Prev Med.* 2020;141:106263.
237. [Who.int](https://www.who.int/campaigns/vaccine-equity) [Internet]. Vaccine Equity. World Health Organisation. [cited 10 January 2022]. Available from: <https://www.who.int/campaigns/vaccine-equity>
238. [parliament.uk](https://publications.parliament.uk/pa/cm5802/cmselect/cmsctech/92/9203.htm) [Internet]. Coronavirus: lessons learned to date. The House of Commons, Science and Technology Committee, and Health and Social Care Committee. [12 October 2021; cited 10 January 2022]. Available from: <https://publications.parliament.uk/pa/cm5802/cmselect/cmsctech/92/9203.htm>
239. Ball P. The lightning-fast quest for COVID vaccines - and what it means for other diseases. *Nature.* 2021;589(7840):16-8.
240. Summers J, Cheng HY, Lin HH, Barnard LT, Kvalsvig A, Wilson N, et al. Potential lessons from the Taiwan and New Zealand health responses to the COVID-19 pandemic. *Lancet Reg Health West Pac.* 2020;4:100044.

- 1
  - 2
  - 3
  - 4
  - 5
  - 6
  - 7
  - 8
  - 9
  - 10
  - 11
  - 12
  - 13
  - 14
  - 15
  - 16
  - 17
  - 18
  - 19
  - 20
  - 21
  - 22
  - 23
  - 24
  - 25
  - 26
  - 27
  - 28
  - 29
  - 30
  - 31
  - 32
  - 33
  - 34
  - 35
  - 36
  - 37
  - 38
  - 39
  - 40
  - 41
  - 42
  - 43
  - 44
  - 45
  - 46
  - 47
  - 48
  - 49
  - 50
  - 51
  - 52
  - 53
  - 54
  - 55
  - 56
  - 57
  - 58
  - 59
  - 60
241. Dagan N, Barda N, Kepten E, Miron O, Perchik S, Katz MA, et al. BNT162b2 mRNA Covid-19 Vaccine in a Nationwide Mass Vaccination Setting. *N Engl J Med.* 2021;384(15):1412-23.
242. Lopez Bernal J, Andrews N, Gower C, Gallagher E, Simmons R, Thelwall S, et al. Effectiveness of Covid-19 Vaccines against the B.1.617.2 (Delta) Variant. *N Engl J Med.* 2021;385(7):585-94.
243. Abu-Raddad LJ, Chemaitelly H, Butt AA, National Study Group for C-V. Effectiveness of the BNT162b2 Covid-19 Vaccine against the B.1.1.7 and B.1.351 Variants. *N Engl J Med.* 2021;385(2):187-9.
244. Chung H, He S, Nasreen S, Sundaram ME, Buchan SA, Wilson SE, et al. Effectiveness of BNT162b2 and mRNA-1273 covid-19 vaccines against symptomatic SARS-CoV-2 infection and severe covid-19 outcomes in Ontario, Canada: test negative design study. *BMJ.* 2021;374:n1943.
245. Nasreen S, Chung H, He S, Brown KA, Gubbay JB, Buchan SA, et al. Effectiveness of mRNA and ChAdOx1 COVID-19 vaccines against symptomatic SARS CoV-2 infection and severe outcomes with variants of concern in Ontario. *MedRxiv [Preprint].* 2021.
246. Puranik A, Lenehan PJ, Silvert E, Niesen MJM, Corchado-Garcia J, O'Horo JC, et al. Comparison of two highly-effective mRNA vaccines for COVID-19 during periods of Alpha and Delta variant prevalence. *MedRxiv [Preprint].* 2021.
247. Julia Stowe, Nick Andrews, Charlotte Gower, Eileen Gallagher, Lara Utsi, Ruth Simmons, et al. Effectiveness of COVID-19 vaccines against hospital admission with the Delta (B.1.617.2) variant. *Public Health England [preprint].* 2021.
248. Lopez Bernal J, Andrews N, Gower C, Robertson C, Stowe J, Tessier E, et al. Effectiveness of the Pfizer-BioNTech and Oxford-AstraZeneca vaccines on covid-19 related symptoms, hospital admissions, and mortality in older adults in England: test negative case-control study. *BMJ.* 2021;373:n1088.
249. Skowronski DM, Setayeshgar S, Zou M, Prystajecky N, Tyson JR, Galanis E, et al. Single-dose mRNA vaccine effectiveness against SARS-CoV-2, including Alpha and Gamma variants: a test-negative design in adults 70 years and older in British Columbia, Canada. *Clin Infect Dis.* 2021.
250. Carazo S, Talbot D, Boulianne N, Brisson M, Gilca R, Deceuninck G, et al. Single-dose mRNA vaccine effectiveness against SARS-CoV-2 in healthcare workers extending 16 weeks post-vaccination: a test-negative design from Quebec, Canada. *Clin Infect Dis.* 2021.
251. Charmet T, Schaeffer L, Grant R, Galmiche S, Cheny O, Von Platen C, et al. Impact of original, B.1.1.7, and B.1.351/P.1 SARS-CoV-2 lineages on vaccine effectiveness of two doses of COVID-19 mRNA vaccines: Results from a nationwide case-control study in France. *Lancet Reg Health Eur.* 2021;8:100171.
252. Tang P, Hasan MR, Chemaitelly H, Yassine HM, Benslimane FM, Al Khatib HA, et al. BNT162b2 and mRNA-1273 COVID-19 vaccine effectiveness against the SARS-CoV-2 Delta variant in Qatar. *Nat Med.* 2021;27(12):2136-43.
253. Hall VJ, Foulkes S, Saei A, Andrews N, Oguti B, Charlett A, et al. COVID-19 vaccine coverage in health-care workers in England and effectiveness of BNT162b2 mRNA vaccine against infection (SIREN): a prospective, multicentre, cohort study. *Lancet.* 2021;397(10286):1725-35.
254. Haas EJ, Angulo FJ, McLaughlin JM, Anis E, Singer SR, Khan F, et al. Impact and effectiveness of mRNA BNT162b2 vaccine against SARS-CoV-2 infections and COVID-19 cases, hospitalisations, and deaths following a nationwide vaccination campaign in Israel: an observational study using national surveillance data. *Lancet.* 2021;397(10287):1819-29.

- 1  
2  
3  
4  
5  
6  
7  
8  
9  
10  
11  
12  
13  
14  
15  
16  
17  
18  
19  
20  
21  
22  
23  
24  
25  
26  
27  
28  
29  
30  
31  
32  
33  
34  
35  
36  
37  
38  
39  
40  
41  
42  
43  
44  
45  
46  
47  
48  
49  
50  
51  
52  
53  
54  
55  
56  
57  
58  
59  
60
255. Nanduri S, Pilishvili T, Derado G, Soe MM, Dollard P, Wu H, et al. Effectiveness of Pfizer-BioNTech and Moderna Vaccines in Preventing SARS-CoV-2 Infection Among Nursing Home Residents Before and During Widespread Circulation of the SARS-CoV-2 B.1.617.2 (Delta) Variant - National Healthcare Safety Network, March 1-August 1, 2021. *MMWR Morb Mortal Wkly Rep.* 2021;70(34):1163-6.
256. Fowlkes A, Gaglani M, Groover K, Thiese MS, Tyner H, Ellingson K, et al. Effectiveness of COVID-19 Vaccines in Preventing SARS-CoV-2 Infection Among Frontline Workers Before and During B.1.617.2 (Delta) Variant Predominance - Eight U.S. Locations, December 2020-August 2021. *MMWR Morb Mortal Wkly Rep.* 2021;70(34):1167-9.
257. Lefevre B, Tondeur L, Madec Y, Grant R, Lina B, van der Werf S, et al. Beta SARS-CoV-2 variant and BNT162b2 vaccine effectiveness in long-term care facilities in France. *Lancet Healthy Longev.* 2021.
258. Pouwels KB, Pritchard E, Matthews PC, Stoesser N, Eyre DW, Vihta K-D, et al. Effect of Delta variant on viral burden and vaccine effectiveness against new SARS-CoV-2 infections in the UK. *Nature Medicine.* 2021.
259. Williams C, Al-Bargash D, Macalintal C, Stuart R, Seth A, Latham J, et al. COVID-19 Outbreak Associated with a SARS-CoV-2 P.1 Lineage in a Long-Term Care Home after Implementation of a Vaccination Program - Ontario, April-May 2021. *Clin Infect Dis.* 2021.
260. Fabiani M, Ramigni M, Gobetto V, Mateo-Urdiales A, Pezzotti P, Piovesan C. Effectiveness of the Comirnaty (BNT162b2, BioNTech/Pfizer) vaccine in preventing SARS-CoV-2 infection among healthcare workers, Treviso province, Veneto region, Italy, 27 December 2020 to 24 March 2021. *Euro Surveill.* 2021;26(17).
261. Thomas SJ, Moreira ED, Jr., Kitchin N, Absalon J, Gurtman A, Lockhart S, et al. Safety and Efficacy of the BNT162b2 mRNA Covid-19 Vaccine through 6 Months. *N Engl J Med.* 2021;385(19):1761-73.
262. Angel Y, Spitzer A, Henig O, Saiag E, Sprecher E, Padova H, et al. Association Between Vaccination With BNT162b2 and Incidence of Symptomatic and Asymptomatic SARS-CoV-2 Infections Among Health Care Workers. *JAMA.* 2021;325(24):2457-65.
263. Bjork J, Inghammar M, Moghaddassi M, Rasmussen M, Malmqvist U, Kahn F. High level of protection against COVID-19 after two doses of BNT162b2 vaccine in the working age population - first results from a cohort study in Southern Sweden. *Infect Dis (Lond).* 2022;54(2):128-33.
264. Cabezas C, Coma E, Mora-Fernandez N, Li X, Martinez-Marcos M, Fina F, et al. Associations of BNT162b2 vaccination with SARS-CoV-2 infection and hospital admission and death with covid-19 in nursing homes and healthcare workers in Catalonia: prospective cohort study. *BMJ.* 2021;374:n1868.
265. Emborg H-D, Valentiner-Branth P, Schelde AB, Nielsen KF, Gram MA, Moustsen-Helms IR, et al. Vaccine effectiveness of the BNT162b2 mRNA COVID-19 vaccine against RT-PCR confirmed SARS-CoV2 infections, hospitalisations and mortality in prioritised risk groups. *MedRxiv [Preprint].* 2021.
266. Gras-Valenti P, Chico-Sanchez P, Algado-Selles N, Jimenez-Sepulveda NJ, Gomez-Sotero IL, Fuster-Perez M, et al. [Effectiveness of the first dose of BNT162b2 vaccine to preventing covid-19 in healthcare personnel.]. *Rev Esp Salud Publica.* 2021;95.
267. Mason TFD, Whitston M, Hodgson J, Watkinson RE, Lau YS, Abdulrazeg O, et al. Effects of BNT162b2 mRNA vaccine on COVID-19 infection and hospitalisation amongst older people: matched case control study for England. *BMC Med.* 2021;19(1):275.

- 1  
2  
3  
4  
5  
6  
7  
8  
9  
10  
11  
12  
13  
14  
15  
16  
17  
18  
19  
20  
21  
22  
23  
24  
25  
26  
27  
28  
29  
30  
31  
32  
33  
34  
35  
36  
37  
38  
39  
40  
41  
42  
43  
44  
45  
46  
47  
48  
49  
50  
51  
52  
53  
54  
55  
56  
57  
58  
59  
60
268. Monge S, Olmedo C, Alejos B, Lapena MF, Sierra MJ, Limia A, et al. Direct and Indirect Effectiveness of mRNA Vaccination against Severe Acute Respiratory Syndrome Coronavirus 2 in Long-Term Care Facilities, Spain. *Emerg Infect Dis*. 2021;27(10):2595-603.
269. Pritchard E, Matthews PC, Stoesser N, Eyre DW, Gethings O, Vihta KD, et al. Impact of vaccination on new SARS-CoV-2 infections in the United Kingdom. *Nat Med*. 2021;27(8):1370-8.
270. Regev-Yochay G, Amit S, Bergwerk M, Lipsitch M, Leshem E, Kahn R, et al. Decreased infectivity following BNT162b2 vaccination: A prospective cohort study in Israel. *Lancet Reg Health Eur*. 2021;7:100150.
271. Shrotri M, Krutikov M, Palmer T, Giddings R, Azmi B, Subbarao S, et al. Vaccine effectiveness of the first dose of ChAdOx1 nCoV-19 and BNT162b2 against SARS-CoV-2 infection in residents of long-term care facilities in England (VIVALDI): a prospective cohort study. *Lancet Infect Dis*. 2021;21(11):1529-38.
272. Swift MD, Breeher LE, Tande AJ, Tommaso CP, Hainy CM, Chu H, et al. Effectiveness of Messenger RNA Coronavirus Disease 2019 (COVID-19) Vaccines Against Severe Acute Respiratory Syndrome Coronavirus 2 (SARS-CoV-2) Infection in a Cohort of Healthcare Personnel. *Clin Infect Dis*. 2021;73(6):e1376-e9.
273. Thompson MG, Burgess JL, Naleway AL, Tyner H, Yoon SK, Meece J, et al. Prevention and Attenuation of Covid-19 with the BNT162b2 and mRNA-1273 Vaccines. *N Engl J Med*. 2021;385(4):320-9.
274. Frencck RW, Jr., Klein NP, Kitchin N, Gurtman A, Absalon J, Lockhart S, et al. Safety, Immunogenicity, and Efficacy of the BNT162b2 Covid-19 Vaccine in Adolescents. *N Engl J Med*. 2021;385(3):239-50.
275. June Choe Y, Yi S, Hwang I, Kim J, Park YJ, Cho E, et al. Safety and effectiveness of BNT162b2 mRNA Covid-19 vaccine in adolescents. *Vaccine*. 2021.
276. Lutrick K, Rivers P, Yoo YM, Grant L, Hollister J, Jovel K, et al. Interim Estimate of Vaccine Effectiveness of BNT162b2 (Pfizer-BioNTech) Vaccine in Preventing SARS-CoV-2 Infection Among Adolescents Aged 12-17 Years - Arizona, July-December 2021. *MMWR Morb Mortal Wkly Rep*. 2021;70(5152):1761-5.
277. Glatman-Freedman A, Bromberg M, Dichtiar R, Hershkovitz Y, Keinan-Boker L. The BNT162b2 vaccine effectiveness against new COVID-19 cases and complications of breakthrough cases: A nation-wide retrospective longitudinal multiple cohort analysis using individualised data. *EBioMedicine*. 2021;72:103574.
278. Pilishvili T, Fleming-Dutra KE, Farrar JL, Gierke R, Mohr NM, Talan DA, et al. Interim Estimates of Vaccine Effectiveness of Pfizer-BioNTech and Moderna COVID-19 Vaccines Among Health Care Personnel - 33 U.S. Sites, January-March 2021. *MMWR Morb Mortal Wkly Rep*. 2021;70(20):753-8.
279. Martinez-Baz I, Miqueleiz A, Casado I, Navascues A, Trobajo-Sanmartin C, Burgui C, et al. Effectiveness of COVID-19 vaccines in preventing SARS-CoV-2 infection and hospitalisation, Navarre, Spain, January to April 2021. *Euro Surveill*. 2021;26(21).
280. Vasileiou E, Simpson CR, Shi T, Kerr S, Agrawal U, Akbari A, et al. Interim findings from first-dose mass COVID-19 vaccination roll-out and COVID-19 hospital admissions in Scotland: a national prospective cohort study. *Lancet*. 2021;397(10285):1646-57.
281. [ecdc.europa.eu](https://ecdc.europa.eu) [Internet]. Interim analysis of COVID-19 vaccine effectiveness against Severe Acute Respiratory Infection due to laboratory-confirmed SARS-CoV-2 among individuals aged 50 years and older, ECDC multi-country study – first update. European Centre for Disease Prevention and Control. [20 January 2022; cited 24 January 2022]. Available from:

- 1  
2  
3 [https://www.ecdc.europa.eu/en/publications-data/interim-analysis-covid-19-vaccine-](https://www.ecdc.europa.eu/en/publications-data/interim-analysis-covid-19-vaccine-effectiveness-against-severe-acute-respiratory)  
4 [effectiveness-against-severe-acute-respiratory](https://www.ecdc.europa.eu/en/publications-data/interim-analysis-covid-19-vaccine-effectiveness-against-severe-acute-respiratory)  
5  
6 282. Rosenberg ES, Dorabawila V, Easton D, Bauer UE, Kumar J, Hoen R, et al. Covid-19  
7 Vaccine Effectiveness in New York State. *N Engl J Med*. 2022;386(2):116-27.  
8 283. Olson SM, Newhams MM, Halasa NB, Price AM, Boom JA, Sahni LC, et al. Effectiveness  
9 of BNT162b2 Vaccine against Critical Covid-19 in Adolescents. *N Engl J Med*. 2022.  
10 284. Zambrano LD, Newhams MM, Olson SM, Halasa NB, Price AM, Boom JA, et al.  
11 Effectiveness of BNT162b2 (Pfizer-BioNTech) mRNA Vaccination Against Multisystem  
12 Inflammatory Syndrome in Children Among Persons Aged 12-18 Years - United States, July-  
13 December 2021. *MMWR Morb Mortal Wkly Rep*. 2022;71(2):52-8.  
14 285. Emary KRW, Golubchik T, Aley PK, Ariani CV, Angus B, Bibi S, et al. Efficacy of ChAdOx1  
15 nCoV-19 (AZD1222) vaccine against SARS-CoV-2 variant of concern 202012/01 (B.1.1.7): an  
16 exploratory analysis of a randomised controlled trial. *Lancet*. 2021;397(10282):1351-62.  
17 286. [astrazeneca.com](https://www.astrazeneca.com) [Internet]. AZD1222 US Phase III trial met primary efficacy endpoint  
18 in preventing COVID-19 at interim analysis. AstraZeneca. [22 March 2021; cited 15 October  
19 2021]. Available from: [https://www.astrazeneca.com/media-centre/press-](https://www.astrazeneca.com/media-centre/press-releases/2021/astrazeneca-us-vaccine-trial-met-primary-endpoint.html)  
20 [releases/2021/astrazeneca-us-vaccine-trial-met-primary-endpoint.html](https://www.astrazeneca.com/media-centre/press-releases/2021/astrazeneca-us-vaccine-trial-met-primary-endpoint.html)  
21  
22 287. Voysey M, Clemens SAC, Madhi SA, Weckx LY, Folegatti PM, Aley PK, et al. Safety and  
23 efficacy of the ChAdOx1 nCoV-19 vaccine (AZD1222) against SARS-CoV-2: an interim analysis  
24 of four randomised controlled trials in Brazil, South Africa, and the UK. *Lancet*.  
25 2021;397(10269):99-111.  
26 288. Madhi SA, Baillie V, Cutland CL, Voysey M, Koen AL, Fairlie L, et al. Efficacy of the  
27 ChAdOx1 nCoV-19 Covid-19 Vaccine against the B.1.351 Variant. *N Engl J Med*.  
28 2021;384(20):1885-98.  
29 289. Pramod S, Govindan D, Ramasubramani P, Kar SS, Aggarwal R, Manoharan N, et al.  
30 Effectiveness of Covishield vaccine in preventing Covid-19 – A test-negative case control study.  
31 *MedRxiv [Preprint]*. 2021.  
32 290. Falsey AR, Sobieszczyk ME, Hirsch I, Sproule S, Robb ML, Corey L, et al. Phase 3 Safety  
33 and Efficacy of AZD1222 (ChAdOx1 nCoV-19) Covid-19 Vaccine. *N Engl J Med*.  
34 2021;385(25):2348-60.  
35 291. Clemens SAC, Folegatti PM, Emary KRW, Weckx LY, Ratcliff J, Bibi S, et al. Efficacy of  
36 ChAdOx1 nCoV-19 (AZD1222) vaccine against SARS-CoV-2 lineages circulating in Brazil. *Nat*  
37 *Commun*. 2021;12(1):5861.  
38 292. Voysey M, Costa Clemens SA, Madhi SA, Weckx LY, Folegatti PM, Aley PK, et al. Single-  
39 dose administration and the influence of the timing of the booster dose on immunogenicity  
40 and efficacy of ChAdOx1 nCoV-19 (AZD1222) vaccine: a pooled analysis of four randomised  
41 trials. *Lancet*. 2021;397(10277):881-91.  
42 293. Bhattacharya A, Ranjan P, Ghosh T, Agarwal H, Seth S, Maher GT, et al. Evaluation of  
43 the dose-effect association between the number of doses and duration since the last dose of  
44 COVID-19 vaccine, and its efficacy in preventing the disease and reducing disease severity: A  
45 single centre, cross-sectional analytical study from India. *Diabetes Metab Syndr*.  
46 2021;15(5):102238.  
47 294. Malathi Murugesan, Prasad Mathews, Hema Paul, Rajiv Karthik, Joy John Mammen,  
48 Rupali. P. Protective Effect Conferred by Prior Infection and Vaccination on COVID-19 in a  
49 Healthcare Worker Cohort in South India. *SSRN [Preprint]*. 2021.  
50 295. Alencar CH, Cavalcanti LPG, Almeida MM, Barbosa PPL, Cavalcante KKS, Melo DN, et  
51 al. High Effectiveness of SARS-CoV-2 Vaccines in Reducing COVID-19-Related Deaths in over  
52 75-Year-Olds, Ceara State, Brazil. *Trop Med Infect Dis*. 2021;6(3).  
53  
54  
55  
56  
57  
58  
59  
60

- 1
  - 2
  - 3
  - 4
  - 5
  - 6
  - 7
  - 8
  - 9
  - 10
  - 11
  - 12
  - 13
  - 14
  - 15
  - 16
  - 17
  - 18
  - 19
  - 20
  - 21
  - 22
  - 23
  - 24
  - 25
  - 26
  - 27
  - 28
  - 29
  - 30
  - 31
  - 32
  - 33
  - 34
  - 35
  - 36
  - 37
  - 38
  - 39
  - 40
  - 41
  - 42
  - 43
  - 44
  - 45
  - 46
  - 47
  - 48
  - 49
  - 50
  - 51
  - 52
  - 53
  - 54
  - 55
  - 56
  - 57
  - 58
  - 59
  - 60
296. Cerqueira-Silva T, Oliveira VdA, Pescarini J, Bertoldo Júnior J, Machado TM, Flores-Ortiz R, et al. The effectiveness of Vaxzevria and CoronaVac vaccines: A nationwide longitudinal retrospective study of 61 million Brazilians (VigiVac-COVID19). . MedRxiv [Preprint]. 2021.
297. Otavio T Ranzani, Rogério dos Santos Leite, Larissa Domingues Castilho, Crhistine Cavalheiro Maymone Gonçalves, Geraldo Resende, Rosana Leite de Melo, et al. Vaccine effectiveness of Ad26.COV2.S against symptomatic COVID-19 and clinical outcomes in Brazil: a test-negative study design. MedRxiv [Preprint]. 2021.
298. Corchado-Garcia J, Puyraimond-Zemmour D, Hughes T, Cristea-Platon T, Lenehan P, Pawlowski C, et al. Real-world effectiveness of Ad26.COV2.S adenoviral vector vaccine for COVID-19. MedRxiv [Preprint]. 2021.
299. Barlow RS, Jian K, Larson L. Effectiveness of COVID-19 Vaccines Against SARS-CoV-2 Infection During a Delta Variant Epidemic Surge in Multnomah County, Oregon, July 2021. MedRxiv [Preprint]. 2021.
300. Polinski JM, Weckstein AR, Batech M, Kabelac C, Kamath T, Harvey R, et al. Effectiveness of the Single-Dose Ad26.COV2.S COVID Vaccine. MedRxiv [Preprint]. 2021.
301. Corchado-Garcia J, Zemmour D, Hughes T, Bandi H, Cristea-Platon T, Lenehan P, et al. Analysis of the Effectiveness of the Ad26.COV2.S Adenoviral Vector Vaccine for Preventing COVID-19. JAMA Netw Open. 2021;4(11):e2132540.
302. Chin ET, Leidner D, Zhang Y, Long E, Prince L, Li Y, et al. Effectiveness of the mRNA-1273 Vaccine during a SARS-CoV-2 Delta Outbreak in a Prison. N Engl J Med. 2021;385(24):2300-1.
303. Gupta K, O'Brien WJ, Bellino P, Linsenmeyer K, Doshi SJ, Sprague RS, et al. Incidence of SARS-CoV-2 Infection in Health Care Workers After a Single Dose of mRNA-1273 Vaccine. JAMA Netw Open. 2021;4(6):e2116416.
304. Chemaitelly H, Yassine HM, Benslimane FM, Al Khatib HA, Tang P, Hasan MR, et al. mRNA-1273 COVID-19 vaccine effectiveness against the B.1.1.7 and B.1.351 variants and severe COVID-19 disease in Qatar. Nat Med. 2021;27(9):1614-21.
305. Herlihy R, Bamberg W, Burakoff A, Alden N, Severson R, Bush E, et al. Rapid Increase in Circulation of the SARS-CoV-2 B.1.617.2 (Delta) Variant - Mesa County, Colorado, April-June 2021. MMWR Morb Mortal Wkly Rep. 2021;70(32):1084-7.
306. Bruxvoort KJ, Sy LS, Qian L, Ackerson BK, Luo Y, Lee GS, et al. Real-world effectiveness of the mRNA-1273 vaccine against COVID-19: Interim results from a prospective observational cohort study. Lancet Reg Health Am. 2021:100134.
307. Bruxvoort KJ, Sy LS, Qian L, Ackerson BK, Luo Y, Lee GS, et al. Effectiveness of mRNA-1273 against delta, mu, and other emerging variants of SARS-CoV-2: test negative case-control study. BMJ. 2021;375:e068848.
308. El Sahly HM, Baden LR, Essink B, Doblecki-Lewis S, Martin JM, Anderson EJ, et al. Efficacy of the mRNA-1273 SARS-CoV-2 Vaccine at Completion of Blinded Phase. N Engl J Med. 2021;385(19):1774-85.
309. Li XN, Huang Y, Wang W, Jing QL, Zhang CH, Qin PZ, et al. Effectiveness of inactivated SARS-CoV-2 vaccines against the Delta variant infection in Guangzhou: a test-negative case-control real-world study. Emerg Microbes Infect. 2021;10(1):1751-9.
310. Min Kang, Yao Yi, Yan Li, Limei Sun, Aiping Deng, Ting Hu, et al. Effectiveness of Inactivated COVID-19 Vaccines Against COVID-19 Pneumonia and Severe Illness Caused by the B.1.617.2 (Delta) Variant: Evidence from an Outbreak in Guangdong, China. SSRN [Preprint]. 2021.

- 1  
2  
3  
4  
5  
6  
7  
8  
9  
10  
11  
12  
13  
14  
15  
16  
17  
18  
19  
20  
21  
22  
23  
24  
25  
26  
27  
28  
29  
30  
31  
32  
33  
34  
35  
36  
37  
38  
39  
40  
41  
42  
43  
44  
45  
46  
47  
48  
49  
50  
51  
52  
53  
54  
55  
56  
57  
58  
59  
60
311. Silva-Valencia Javier, Soto-Becerra Percy, Escobar-Agreda Stefan, Fernández-Navarro Manuel, Moscoso-Porras Miguel, Solari Lely, et al. Effectiveness of the BBIPB-CorV Vaccine in Preventing Infection and Death in Health Care Workers in Peru 2021. SSRN [Preprint]. 2021.
  312. Al Kaabi N, Zhang Y, Xia S, Yang Y, Al Qahtani MM, Abdulrazzaq N, et al. Effect of 2 Inactivated SARS-CoV-2 Vaccines on Symptomatic COVID-19 Infection in Adults: A Randomized Clinical Trial. *JAMA*. 2021;326(1):35-45.
  313. Farida Ismail ALHosani, Anderson Eduardo Stanciole, Bashir Aden, Andrey Timoshkin, Omar Najim, Walid Abbas Zaher, et al. Sinopharm's BBIPB-CorV vaccine effectiveness on preventing hospital admission and deaths: results from a retrospective study in the Emirate of Abu Dhabi, United Arab Emirates (UAE). SSRN [Preprint]. 2021.
  314. AlQahtani M, Bhattacharyya S, Alawadi A, Mahmeed HA, Sayed JA, Justman J, et al. Morbidity and mortality from COVID-19 postvaccination breakthrough infections in association with vaccines and the emergence of variants in Bahrain. *Research Square* [Preprint]. 2021.
  315. Jara A, Undurraga EA, Gonzalez C, Paredes F, Fontecilla T, Jara G, et al. Effectiveness of an Inactivated SARS-CoV-2 Vaccine in Chile. *N Engl J Med*. 2021;385(10):875-84.
  316. Ranzani OT, Hitchings MDT, Dorion M, D'Agostini TL, de Paula RC, de Paula OFP, et al. Effectiveness of the CoronaVac vaccine in older adults during a gamma variant associated epidemic of covid-19 in Brazil: test negative case-control study. *BMJ*. 2021;374:n2015.
  317. Hitchings MDT, Ranzani OT, Torres MSS, de Oliveira SB, Almiron M, Said R, et al. Effectiveness of CoronaVac among healthcare workers in the setting of high SARS-CoV-2 Gamma variant transmission in Manaus, Brazil: A test-negative case-control study. *Lancet Reg Health Am*. 2021;1:100025.
  318. Enny S. Paixao, Kerry LM Wong, Flavia Jôse Oliveira Alves, Vinicius de Araújo Oliveira, Thiago Cerqueira-Silva, Juracy Bertoldo Júnior, et al. Effectiveness of the CoronaVac vaccine in prevention of symptomatic and progression to severe Covid-19 in pregnant women in Brazil. SSRN [Preprint]. 2021.
  319. Hitchings MDT, Ranzani OT, Scaramuzzini Torres MS, de Oliveira SB, Almiron M, Said R, et al. Effectiveness of CoronaVac in the setting of high SARS-CoV-2 P.1 variant transmission in Brazil: A test-negative case-control study. *MedRxiv* [Preprint]. 2021.
  320. Tanriover MD, Doganay HL, Akova M, Guner HR, Azap A, Akhan S, et al. Efficacy and safety of an inactivated whole-virion SARS-CoV-2 vaccine (CoronaVac): interim results of a double-blind, randomised, placebo-controlled, phase 3 trial in Turkey. *Lancet*. 2021;398(10296):213-22.
  321. Palacios R, Batista AP, Albuquerque CSN, Patiño EG, Santos JdP, Tilli Reis Pessoa Conde M, et al. Efficacy and Safety of a COVID-19 Inactivated Vaccine in Healthcare Professionals in Brazil: The PROFISCOV Study. SSRN [Preprint]. 2021.
  322. Ella R, Reddy S, Blackwelder W, Potdar V, Yadav P, Sarangi V, et al. Efficacy, safety, and lot-to-lot immunogenicity of an inactivated SARS-CoV-2 vaccine (BBV152): interim results of a randomised, double-blind, controlled, phase 3 trial. *Lancet*. 2021;398(10317):2173-84.
  323. Desai D, Khan AR, Soneja M, Mittal A, Naik S, Kodan P, et al. Effectiveness of an inactivated virus-based SARS-CoV-2 vaccine, BBV152, in India: a test-negative, case-control study. *Lancet Infect Dis*. 2021.
  324. Malhotra S, Mani K, Lodha R, Bakhshi S, Mathur VP, Gupta P, et al. SARS-CoV-2 Reinfection Rate and Estimated Effectiveness of the Inactivated Whole Virion Vaccine BBV152 Against Reinfection Among Health Care Workers in New Delhi, India. *JAMA Netw Open*. 2022;5(1):e2142210.



- 1  
2  
3 325. Heath PT, Galiza EP, Baxter DN, Boffito M, Browne D, Burns F, et al. Safety and Efficacy  
4 of NVX-CoV2373 Covid-19 Vaccine. *N Engl J Med*. 2021;385(13):1172-83.  
5  
6 326. Dunkle LM, Kotloff KL, Gay CL, Anez G, Adelglass JM, Barrat Hernandez AQ, et al.  
7 Efficacy and Safety of NVX-CoV2373 in Adults in the United States and Mexico. *N Engl J Med*.  
8 2021.  
9  
10 327. Toback S, Galiza E, Cosgrove C, Galloway J, Goodman AL, Swift PA, et al. Safety,  
11 immunogenicity, and efficacy of a COVID-19 vaccine (NVX-CoV2373) co-administered with  
12 seasonal influenza vaccines: an exploratory substudy of a randomised, observer-blinded,  
13 placebo-controlled, phase 3 trial. *Lancet Respir Med*. 2021.  
14  
15 328. Shinde V, Bhikha S, Hoosain Z, Archary M, Borhat Q, Fairlie L, et al. Efficacy of NVX-  
16 CoV2373 Covid-19 Vaccine against the B.1.351 Variant. *N Engl J Med*. 2021;384(20):1899-909.  
17  
18  
19  
20  
21  
22  
23  
24  
25  
26  
27  
28  
29  
30  
31  
32  
33  
34  
35  
36  
37  
38  
39  
40  
41  
42  
43  
44  
45  
46  
47  
48  
49  
50  
51  
52  
53  
54  
55  
56  
57  
58  
59  
60

## Response to Reviewers - COVID-19: Virology, variants, and vaccines

We would like to thank the editor and reviewers for their insightful and useful comments on our review. We have addressed the comments within the article and outlined the changes we have made below. We believe these alterations and changes have significantly improved the review as a result. The reviewer's comments are preceded by "**Comment**" and our response is preceded by "**Response**". Where possible, we have included the in-text amendments after each response in italics. Any changes or additions to the text are also highlighted in the manuscript.

### Editors' comments:

#### Comment

1. Please provide a **document labelled 'response to reviewers'** which gives a point-by-point response to both the referees comments and those of the editors.

#### Response

*Thank you. This document provides a point-by-point response of both the editors and reviewers comments.*

#### Comment

2. Abstract: as the review is not a systematic review and therefore not classed as original Research, please remove the structured headings. The abstract should just summarise what the review is about in 2-300 words (ie the same as your BMJ review).

#### Response

*Thank you for the suggestion. We have updated the abstract and removed the structured headings. It now reads as following:*

#### ***"Abstract***

*As of 25th January 2022, there have been over 349 million confirmed cases of COVID-19, with over 5.59 million confirmed deaths associated with the SARS-CoV-2 virus. The COVID-19 pandemic has prompted an extensive, global effort to study the molecular evolution of the virus and develop vaccines to combat its spread. Although rigorous determination of SARS-CoV-2 infectivity remains elusive, due to the continuous evolution of the virus, steps have been made to understand its genome, structure, and emerging genetic mutations. The SARS-CoV-2 genome is composed of a number of open reading frames (ORFs) and structural proteins, including the spike protein, which is essential for entry into host cells. As of the 25th January 2022, the WHO reports five variants of concern (VOC) two variants of interest (VOI) and three variants under monitoring (VUM). The mutations harboured in these variants confer an increased transmissibility, severity of disease, and escape from neutralising antibodies compared to the primary strain. The current vaccine strategy, including booster doses, provides protection from severe disease. As of 24th January 2022, there are 33 approved vaccines in use in 197 countries. In this review, we discuss the genetics, structure and transmission methods of SARS-CoV-2 and its variants, highlighting how mutations provide enhanced abilities to spread and inflict disease. We also outline the vaccines currently in use around the world, providing evidence for the immunogenicity and effectiveness of each."*

#### Comment

3. Methods: please include the dates you searched from and to. Due to the additions requested below the end search date will be more current. Please provide more detail about the exclusion criteria (study design etc).

#### Response

<https://mc.manuscriptcentral.com/bmjmedicine>

*We have updated the dates we searched to and from.*

*Due to the restrictions on the word count, we have provided some more information on selection criteria within the methods section, however, we have also provided a supplementary file describing the specific search terms and the inclusion/exclusion criteria that we used.*

*The methods section now reads as:*

*“We searched PubMed and Embase databases for COVID-19-related articles published between 1st January 2020 and 25th January 2022 and for general coronavirus-related articles published from 1st January 2000 onwards. Our search terms included SARS-CoV-2, COVID-19, and specific terms including virology, genome, variants, and vaccine. Additional, specific search terms are outlined in supplementary file 1. We performed further manual searching for additional articles and data using relevant databases, including who.int, gov.uk, and ecdc.europa.eu/en. Due to the rapidly evolving nature of the literature involving SARS-CoV-2, we also searched preprint databases including MedRxiv and BioRxiv. Due to the various topics addressed here, studies were selected through different criteria, details of which can be found in supplementary file 1. Overall, studies were selected based on quality and journal reputation, with real-world studies with large sample sizes of greatest interest.”*

## Comment

4. **OMICRON:** Please can you include in relevant sections throughout the review what is known about the new OMICRON variant, and any other variants of interest.

## Response

*We have included a section dedicated to the Omicron variant in the variants of concern section, while relevant omicron studies have been included and discussed elsewhere, e.g. in the waning immunity and boosters section.*

*This section now reads as:*

### *“5.1.5 Omicron*

*The Omicron variant is of the B.1.1.529 lineage and was first discovered in November 2021 in South Africa and Botswana before being detected in multiple countries and classified as a VOC on 26th November 2021(3). This variant contains over 30 S protein mutations(100), 23 of which have been previously identified, including K417N, T478K, E484A, D614G, H655Y, P681H, and N501Y(131). 15 Omicron mutations are contained within the RBD(17) providing the variant with a significantly enhanced binding affinity to the ACE2 receptor(131, 132). In addition, various single mutations harboured with the RBD of the Omicron variant impair the effectiveness of neutralising antibodies, including K417N, N440K, G446S, E484A, Q493K, G496S, G339D, S371L, and S375F(17).*

*The emergence of Omicron has been followed by a tidal wave of infections worldwide. Early data from South Africa demonstrated that the proportion of COVID-19 cases caused by the Omicron variant rose from 3% in early October, to 98% by early December(133). In late December 2021, meanwhile, the doubling time for number of positive Omicron cases was between two and three in the UK, US, and much of Europe(134, 135), highlighting the transmissibility of this variant. The mutations harboured by Omicron that enhance its binding affinity(131, 132) and ability to escape neutralising antibodies(17) likely drove its rapid spread, as did its fast replication rate, which is around 70 times faster than the Delta and wild-type strains(136). The reinfection rate of Omicron has also been found to be significantly higher than that of previous variants in studies from Scotland(137) and South Africa(138).*

*The Omicron variant has extensive but incomplete escape from naturally acquired and vaccine-induced immunity(139, 140). Compared to the Delta variant, Omicron requires around a ten-fold*

1 increased antibody titre to be neutralised, following vaccination with either Oxford-AstraZeneca or  
2 Pfizer/BioNtech vaccines(141). Indeed, blood sera from individuals who had received two doses of the  
3 Pfizer/BioNtech vaccine exhibited more than a 25-fold reduction in neutralising antibody titres  
4 against the Omicron variant compared to the wild-type strain(142). T-cell responses to Omicron may  
5 remain intact, however. One preprint study demonstrated that 70-80% of the T-cell response  
6 targeting the S protein was maintained in those vaccinated or with prior infection, while the  
7 magnitude of Omicron cross-reactive T-cells was similar to that of both Delta and Beta variants(143).  
8 Furthermore, data from Pfizer/BioNtech revealed that 80% of the epitopes in the Omicron variant S  
9 protein that are recognised by CD8+ T-cells were not affected by this variant's mutations, following  
10 two-doses of the vaccine(142). T-cell responses induced from vaccine administration or prior infection  
11 may, therefore, provide some protection from severe disease.  
12  
13

14 Recent real-world evidence has implied that Omicron infection is milder in severity than  
15 previous variants. In an early South African analysis, the risk of hospitalisation ( $aOR=0.2$ ) was lower  
16 for Omicron infections compared to non-Omicron SARS-CoV-2 infections(133) while, compared to  
17 earlier infections associated with the Delta variant, Omicron-infected individuals had a lower risk of  
18 severe disease ( $aOR=0.3$ )(133). In December 2021 in England, Omicron cases were found to induce a  
19 significantly reduced risk of hospitalisation or presentation for emergency care in comparison to  
20 Delta cases(144, 145). The decreased disease severity inflicted by Omicron may be due to its reduced  
21 capacity for replication in lung tissue, which was found to be more than ten times less in lung tissue  
22 compared to Delta(136). Concordantly, the S protein of the Omicron variant is less efficient at  
23 cleaving the ACE2 receptor and entering cells of lung organoids(141), while is also less able to cause  
24 fusion between lung cells compared to Delta(141), which is often observed in cases of severe COVID-  
25 19. The reduction in replication within the lungs, and the preservation of T-cell responses likely  
26 contribute to the milder disease exerted by the Omicron variant.  
27  
28  
29

30 Although the Omicron variant appears to manifest in mild disease, high case numbers may  
31 still result in a large number of hospitalisations and deaths in those vulnerable to the virus. Omicron  
32 case numbers may be beginning to peak, however. In South Africa, a 29.7% decrease in weekly  
33 COVID-19 cases were reported in the week ending 25th December 2021, compared to the previous  
34 week, and the Omicron wave is said to have passed(146). Concerningly, global case numbers  
35 continue to rise rapidly(147) and many countries will continue to feel the pressure exerted by the  
36 wave of Omicron infections.”  
37  
38  
39

#### 40 **Comment**

- 41  
42 5. Vaccination/Waning immunity sections: please update these sections to include any new data on  
43 efficacy, and the recent data on the efficacy of the different booster jabs.  
44

#### 45 **Response**

46  
47 *We have updated these sections with new data. Table 2 has also been updated to include*  
48 *new data on vaccine effectiveness.*  
49

50  
51 *The waning immunity and boosters section now reads as:*

52 *“6.11 Waning immunity and boosters*

53 *Throughout the COVID-19 pandemic, emerging variants have threatened the effectiveness of*  
54 *vaccines (table 2). Simultaneously, waning immunity following vaccination questions how long*  
55 *vaccines remain effective, and highlights the importance of booster doses. Indeed, protection against*  
56 *SARS-CoV-2 following vaccination decreases over time, both in terms of antibody titres(188-190) and*  
57 *vaccine effectiveness(191-194). Cellular responses, such as T-cell immunity, may persist for longer*  
58 *periods, however(195, 196). With a gradual loss of protection from SARS-CoV-2 following COVID-19*  
59 *vaccination, many countries are now rolling out booster programmes with the aim of raising levels of*  
60 *immunity.*

1 Since booster programmes began, evidence that a booster vaccine dose enhances antibody  
 2 and cellular responses has accumulated. Following a third dose of vaccine, neutralising antibody  
 3 titres increase significantly(197-200) and, in some cases, to higher levels than after the primary two  
 4 doses(197). Additionally, boosters have also been found to increase neutralising antibody titres  
 5 against Beta, Gamma, Delta, and Omicron variants(198, 201, 202). T-cell response is also enhanced  
 6 following a third dose(199, 203, 204). Together, enhancing neutralising antibody and cellular  
 7 responses with a booster vaccine dose is likely to provide a greater level of protection than relying on  
 8 immunity built through a primary regimen.  
 9

10 The antibody and cellular responses observed following booster vaccinations have been  
 11 found to correlate with increased levels of protection against SAR-CoV-2 infection and severe illness.  
 12 On 30th July 2021, Israel was the first country to offer a third dose of BNT162b2 to certain groups.  
 13 Subsequently, several studies have revealed that those who received a third vaccine dose were  
 14 significantly less likely to be infected or have severe disease with SARS-CoV-2 compared to those who  
 15 received two-doses(205-208). In those aged 60 or older, an observational study demonstrated that  
 16 the rate of severe COVID-19 and death was lower in the boosted group by a factor of 17.9 and 14.7,  
 17 respectively, compared to the non-boosted group(209). Booster doses of COVID-19 vaccine have been  
 18 shown to be effective against infection with Delta(210, 211) and, to a lesser degree, Omicron  
 19 variants(141, 142, 145, 211-213) despite the numerous mutations harboured by these variants.  
 20 Overall, increasing evidence is pointing towards the benefits of booster doses of COVID-19 vaccines,  
 21 therefore it is expected that booster programmes will continue to roll out across the globe. Based on  
 22 current evidence, the CDC recommend that the time interval for receiving a booster following the  
 23 primary regimen is five months for Pfizer/BioNTech BNT162b2 primary regimen, six months for  
 24 Moderna mRNA-1273 primary regimen, and two months for Johnson & Johnson Ad26.COVS primary  
 25 regimen(214). As the pandemic progresses and new variants emerge, variant-specific  
 26 vaccines may require development, with pre-clinical studies demonstrating their efficacy(215) and  
 27 pharmaceutical companies, such as Pfizer, advancing in variant-specific vaccine development(142).  
 28 Policy makers should also consider when vaccine boosters will be given in the future and who will  
 29 receive booster doses in the long-term.”  
 30  
 31  
 32  
 33  
 34

### 35 Comment

36 6. Tables: please update the tables to include any new data.  
 37

### 38 Response

39 Thank you, the following sentences outline the updates that have been made to each table.  
 40

41 Table 1 has been updated to include the current VOC/VUI/VUM, as listed by WHO.  
 42

43 Table 2 has been updated to include new data on vaccine effectiveness.  
 44

45 Table 3 has been updated to include current vaccines that are approved in at least 1 county,  
 46 that are not discussed in the main manuscript text.  
 47  
 48  
 49

### 50 Comment

51 7. Please include a section on **EMERGING TREATMENTS**: Please include a brief section on new  
 52 techniques and advances that are currently being studied, cite the appropriate studies, and say  
 53 when they will report.  
 54  
 55

### 56 Response

57 Thank you, we have now included this section with some discussion of recently approved  
 58 drugs and those in development:  
 59  
 60

“7. Emerging Treatments



1  
2  
3  
4  
5  
6  
7  
8  
9  
10  
11  
12  
13  
14  
15  
16  
17  
18  
19  
20  
21  
22  
23  
24  
25  
26  
27  
28  
29  
30  
31  
32  
33  
34  
35  
36  
37  
38  
39  
40  
41  
42  
43  
44  
45  
46  
47  
48  
49  
50  
51  
52  
53  
54  
55  
56  
57  
58  
59  
60

*As more is learnt about the virus, the therapeutic strategy against COVID-19 develops. There are currently over two thousand ongoing trials assessing certain treatment strategies for COVID-19(216). Recently, antivirals including molnupiravir (Lagevrio) and nirmatrelvir/ritonavir (Paxlovid) have been approved in the UK(217, 218), US(219, 220), and Europe(221, 222) for treating COVID-19 in certain risk groups. Similarly, sotrovimab (Xevudy), a monoclonal antibody treatment, has recently been approved for use in treating certain COVID-19 patients in the UK(223), US(224), and Europe(225). These drugs have been shown to be effective at preventing poor clinical outcomes, including death, in those vulnerable to severe COVID-19 infection. Other drug treatments, such as janus kinase inhibitors, corticosteroids, and anti-inflammatories have contrasting evidence to support their use, and therefore, the use of specific drugs is either recommended for or against by certain treatment and management guidelines, which are discussed below."*

#### Comment

8. **GUIDELINES:** Please cite any relevant international guidelines and say how they differ, what their strengths and weaknesses are, and under what circumstances they are most appropriate. Please give preference to the most independent and recently updated guidelines.

#### Response

*Thank you, we have now included this section to outline which treatment guidelines are available for COVID-19.*

*"8. Guidelines*

*The treatment and management of COVID-19 is a continually evolving topic, however, health authorities have published and continue to update guidelines and recommendations for treating COVID-19. The WHO living guideline on COVID-19 and therapeutics is regularly updated, with the latest version, published on 14th January 2022 containing 14 recommendations on COVID-19 treatment(226). In the UK, the National Institute for Health and Care Excellence (NICE)(227) and Medicines and Healthcare products Regulatory Agency (MHRA)(228) provide updated guidelines on COVID-19 treatment, while in Europe, the ECDC regularly publishes several guidelines providing recommendations on a range of COVID-19 related topics(229). In the US, the National Institutes of Health (NIH)(230) and the CDC(231) provide guidance on COVID-19 treatment and management, with the CDC supplying guidelines for specific groups including, employers, schools, health departments, and governments."*

#### Reviewer: 1

#### Comment

1. In the section "3. Viral transmission, clinical presentation, and genetic susceptibility of COVID-19", there could be a further briefing of the spectrum of the characteristic symptoms (clinical characteristics). It would also benefit by mentioning that the whole of the population would be susceptible to COVID-19 although there exist some subgroups more susceptible to develop poorer clinical outcomes.

#### Response

Thank you, we have added to this section to mention the broad spectrum of COVID-19 symptoms and have mentioned that although everyone is susceptible to covid-19, some groups are more susceptible to poorer outcomes:

*"The clinical presentation of COVID-19 is non-specific, heterogeneous, and infection can result in a wide spectrum of symptoms. Following an incubation period of 4-14 days, symptoms develop ranging*

1 from mild to severe disease and, in some cases, can result in death(12). The most common COVID-19  
2 symptoms include fever, cough, dyspnoea, and fatigue(13, 14), while myalgia, gastrointestinal issues,  
3 cognitive deficits, and other symptoms are reported. Asymptomatic individuals can also test positive  
4 for COVID-19(15, 16). Although the entire population is susceptible to COVID-19 infection, some  
5 subgroups within the general population exist that are more susceptible to developing poorer clinical  
6 outcomes.”  
7

## 8 Comment

- 9
- 10 2. Also within the same section, the description for the gene loci associated with the risk of severe  
11 disease could be streamlined a bit since the contents did not seem to be aligned well in the current  
12 form. There could also be the introduction regarding the polygenetic risk score and the  
13 comorbidities (e.g., COPD) for predicting the susceptibility to COVID-19.  
14  
15

## 16 Response

17  
18 *Thank you for this comment. This section has been shortened in order to keep the focus*  
19 *firmly on the main topics of the article. We have also included a short introduction of*  
20 *polygenetic risk scores and how they may be used along with comorbidities to infer risk of*  
21 *COVID-19:*  
22

23  
24 “The utilisation of polygenetic risk scores (PRS) may be useful in determining an individual’s risk for  
25 developing severe disease caused by COVID-19(35). A PRS infers a person’s risk of susceptibility to or  
26 development of a certain disease based on the total number of genomic variations they possess.  
27 Determining PRS with the inclusion of comorbidities, such as chronic obstructive pulmonary  
28 disease(36), or other aspects, such as coagulation factors(37), may improve the usefulness of PRS in  
29 determining a person’s risk of severe COVID-19.”  
30  
31

## 32 Comment

- 33
- 34 3. In the section "4. Virology of SARS-CoV-2", it would be better to summarize the duration that the  
35 SARS-CoV-2 could survive in the environment (e.g., metal surface, etc.).  
36

## 37 Response

38  
39 *Towards the end of section “4. Virology of SARS-CoV-2”, which now provides a useful*  
40 *description of how long the virus can survive in the environment, which is a contributing*  
41 *factor to its transmission:*  
42

43  
44 *“The SARS-CoV-2 virus may survive on surfaces or suspended in air droplets for varying periods of time.*  
45 *Indeed, on plastic, stainless steel, and glass surfaces, the half-life of the virus is around 5.3, 4.4, and*  
46 *4.2 hours, respectively(7), with no difference seen between SARS-CoV-2 variants(8). Although SARS-*  
47 *CoV-2 can be detected on inanimate surfaces for hours and days, due to the evaporation of water*  
48 *droplets, the viruses’ living environment, the concentration of the virus plummets rapidly(9). Protective*  
49 *measures, including using personal protective equipment (PPE), maintaining indoor ventilation, and*  
50 *disinfecting hands and surfaces, can effectively limit the spread of SARS-CoV-2(10).”*  
51

## 52 Comment

- 53
- 54 4. Perhaps it would merit if the conformational changes of the S protein that occur after binding with  
55 the host cell be described.  
56

## 57 Response

58  
59 *Thank you. To address this comment, we have added a short description of the S protein*  
60 *structure and the conformational changes that occur:*

1  
2  
3  
4  
5  
6  
7  
8  
9  
10  
11  
12  
13  
14  
15  
16  
17  
18  
19  
20  
21  
22  
23  
24  
25  
26  
27  
28  
29  
30  
31  
32  
33  
34  
35  
36  
37  
38  
39  
40  
41  
42  
43  
44  
45  
46  
47  
48  
49  
50  
51  
52  
53  
54  
55  
56  
57  
58  
59  
60

*“The subunits of the trimeric S complex are either in a closed (pre-fusion stage) or open (post-fusion stage) conformation(62), with one subunit always in an open conformation to allow for ACE2 recognition and binding(63). The RBD itself consists of five anti-parallel  $\beta$ -strands surrounded by several  $\alpha$ -helices(64). From closed to open conformation, the RBD undergoes structural rearrangement whereby the globular head region rotates clockwise, which alters its electropotential surface(64). Once positioned, numerous residues within the RBD form either hydrogen bonds or salt bridges with residues of the ACE2 receptor, allowing for tight binding(65), while the concave structure of the RBD allows for three distinct binding regions(64).”*

**Comment**

5. Not sure why there should be the section "4.1 Other human coronaviruses" which seemed less relevant to the topic.

**Response**

*Thank you, we agree that this section was less relevant and did not add much to the overall manuscript, therefore, this section has been removed.*

**Comment**

6. In the section "5. Variants of SARS-CoV-2" perhaps it would not be necessary to address the abbreviations for VOI and VUM again since this has already been introduced well before.

**Response**

*Thank you, we agree with this comment. As VOC/VOI/VUM have been defined previously in the introduction, it is not needed here. This repetition of definitions has been removed from section 5.*

**Comment**

7. I am afraid that the authors should contemplate on what the focus of the VOC should be. Basic science or clinical themes? Most of the current efforts seemed to focus on the former rather than the latter. However, the impact of the variants on the subsequent waves of outbreaks globally would seem more important to the epidemiologist and clinicians. This is perhaps most relevant to the Delta strain.

**Response**

*This is an important point and we have included the following section to stress the importance of the clinical themes, in addition to the basic science in regard to VOCs: “The current method of identifying variants relies on the use of genomic testing such as whole genome sequencing, partial S-gene sequencing, or nucleic acid amplification technique (NAAT)-based assays(72). The aspects of different variants that most people experience, however, is the clinical symptoms they inflict. Certain variants induce a greater risk of severe disease and death, such as Alpha and Delta(73), while others are more likely to induce milder symptoms, such as Omicron(74, 75). Moreover, individual symptoms can differ between variants. For example, the Gamma variant is associated with inflicting anosmia and dysgeusia(76), which is less commonly seen in Omicron infections. Moving forward, the clinical themes and symptoms associated with emerging variants should be elucidated rapidly in order for the public and healthcare professionals to rapidly identify possible cases of COVID-19.”*

**Comment**

8. The section "6. Vaccinations" seemed to be a pile-up of the evidence without a clear focus. I am afraid that not all identical weight should be given to the different vaccines. Moreover, the most



well-proven efficacy, safety, reactogenicity and adverse events should be summarized in a clearer way.

## Response

*We agree that this section had little focus and certain vaccines should have greater weight than others. We have attempted to address this by giving the major vaccines the majority of the weight and giving each vaccine section a clear structure: i) what the vaccine is ii) immunogenicity iii) reactogenicity iv) safety/adverse events v) mention that effectiveness can be seen in table 2. To save on words, effectiveness has not been fully outlined in the text, instead table 2 outlines studies that give estimations of effectiveness for each vaccine. This section now reads as:*

### *“6. Vaccinations*

*The COVID-19 pandemic prompted a rapid international search for safe and effective vaccines against the SARS-CoV-2 virus. In line with previous vaccine development, including for both SARS-CoV and MERS-CoV, the S protein was a key target for COVID-19 vaccine development(154). As of 24th January 2022, 33 approved vaccines are in use in 197 countries, with ten vaccines having gained emergency use listing approval from the WHO(4), (table 2). As of 25th January 2022 there are 194 vaccines in pre-clinical development and 140 in clinical development(155). Numerous studies have explored the effectiveness of approved vaccines, however, large variations in vaccine effectiveness are reported. This variability is likely due to several factors in the studies including, the country, date, and population size of the study, as well as the SARS-CoV-2 variants circulating during the study period. These factors, along with how the effectiveness is reported, mean that it is difficult to compare vaccines and fully understand how effective each vaccine is. Here, we review the COVID-19 vaccines in use around the world.*

#### *6.1 Pfizer/BioNtech - BNT162b2*

*The BNT162b2 vaccine (Comirnaty) is a lipid nanoparticle-formulated, nucleoside-modified mRNA vaccine encoding a modified SARS-CoV-2 S protein which was developed through a collaborative effort between Pfizer (New York, US) and BioNTech (Mainz, Germany)(156, 157). BNT162b2 gained WHO emergency use listing on 31st December 2020(158) and, as of 24th January 2022, has been approved for use in 136 countries(4). Following administration of BNT162b2, a Th1-biased response is observed, with tumour necrosis factor alpha (TNF $\alpha$ ), interferon gamma (IFN $\gamma$ ), and interleukin-2 (IL-2) all elevated following vaccination, compared to placebo(159, 160). Highest neutralisation titres are found between seven and fourteen days following the second dose(161), while those previously infected with COVID-19 showed a four-fold increase in antibody binding and a 18-fold increase in neutralisation titres compared to previously uninfected individuals following two-doses(162). The BNT162b vaccine is well tolerated, with limited reactogenicity. Redness and swelling at injection site have been reported, however mild or moderate pain at the injection site is the most commonly reported reaction to vaccination(161). Fatigue, muscle pain, headache and chills are other commonly reported symptoms following BNT162b2 administration(163). The rate of systemic reactions after a second dose of BNT162b has been found to be 1.7 to 2 times higher than after a first dose, possibly suggesting an immunity-boosting effect(164). Many safety reports of this vaccine describe no serious adverse events(161, 164, 165), however, a large study found that BNT162b2 was associated with an increased risk of myocarditis, lymphadenopathy, appendicitis, and herpes zoster*

1 infection(166). Although rare, allergic reaction or anaphylaxis has also been reported  
2 following administration of the BNT162b2 vaccine(163). Table 2 outlines clinical trial and  
3 real-world data for vaccine effectiveness.  
4

## 5 6.2 Oxford-AstraZeneca – AZD1222

7 The AZD1222 vaccine (Vaxzevria) is a non-replicating vector of the chimpanzee  
8 adenovirus ChAdOx1, modified to encode the SARS-CoV-2 S protein(167). Developed through  
9 collaboration between the University of Oxford and AstraZeneca (Cambridge, UK), this  
10 vaccine was given WHO emergency use listing on 16th February 2021(158) and has been  
11 approved for use in 137 countries, as of 24th January 2022(4). The WHO has granted  
12 emergency use listing to two versions of this vaccine (AZD1222 and Covishield) in order to  
13 utilise Covishield as part of their worldwide COVAX initiative, which is being produced by the  
14 Serum Institute of India and AstraZeneca-SKBio (Republic of Korea)(168).  
15

16 Following administration of AZD1222, significant antibody production, predominantly  
17 of IgG1 and IgG3 subclasses, and a Th-1 cell response, with increased expression of IFN $\gamma$  and  
18 TNF $\alpha$ , is seen(122, 169). One dose of AZD1222 has been shown to produce a neutralising  
19 antibody response in 91% of participants, while a second dose resulted in 100% of  
20 participants producing neutralising antibodies(170). Mild and moderate itch, pain, redness,  
21 swelling, tenderness, and warmth are common local reactions, while chills, fatigue, fever,  
22 headache, muscle ache, and nausea are commonly reported systemic reactions following  
23 AZD1222 administration(170). Rare symptoms, including severe chest pain, nasal bleeding,  
24 and allergic reaction have been reported following AZD1222 administration(171). Table 2  
25 outlines clinical trial and real-world data for vaccine effectiveness.  
26  
27  
28  
29  
30  
31

## 32 6.3 Johnson & Johnson - Ad26.COV.2.S

33 The Ad26.COV.2.S vaccine is a non-replicating adenovirus vector, modified to contain  
34 the SARS-CoV-2 S protein in a prefusion-stabilised conformation and requires a single  
35 dose(172). This vector was developed from the recombinant human adenovirus type 26 by  
36 the Janssen pharmaceutical company of Johnson & Johnson (New Brunswick, New Jersey,  
37 US)(172) and was listed for WHO emergency use listing on 12th March 2021(158). As of 24th  
38 January 2022, Ad26.COV.2.S has been approved for use in 106 countries(4).  
39

40 The Ad26.COV.2.S vaccine induces the production of a variety of antibody subclasses,  
41 such as IgG, IgM and IgA, and promotes several non-neutralising antibody responses,  
42 including activation of CD4+ and CD8+ Th1-cells and production of IFN $\gamma$ , IL-2, and TNF $\alpha$ (173,  
43 174). Although neutralising antibody responses induced by Ad26.COV.2.S are reduced against  
44 SARS-CoV-2 variants, non-neutralising antibody and T-cell responses have been found to be  
45 preserved against VOC(173), while a prior COVID-19 infection significantly increases levels of  
46 S protein-binding antibodies, antibody-dependent cellular cytotoxicity, and neutralising  
47 antibodies against VOCs including Beta and Delta(175). Ad26.COV.2.S is safe and well  
48 tolerated, with a large clinical trial demonstrating that headache, fatigue, and myalgia, are  
49 the most common systemic reactions, while injection-site pain is the most common local  
50 reaction following administration(172). Like other vaccines, Ad26.COV.2.S has been  
51 associated with serious adverse events, such as allergic reactions and cerebral venous sinus  
52 thrombosis, however, these are rare(163, 176). Table 2 outlines clinical trial and real-world  
53 data for vaccine effectiveness.  
54  
55  
56  
57  
58  
59  
60

## 6.4 Moderna – mRNA-1273

*The mRNA-1273 vaccine (Spikevax) developed by Moderna (Massachusetts, US) is a lipid-nanoparticle-encapsulated mRNA vaccine expressing the SARS-CoV-2 S protein that has been prefusion-stabilised(177). This vaccine gained WHO emergency use listing on 30th April 2021(158), and as of 24th January 2022, has been approved for use in 85 countries(4).*

*The mRNA-1273 vaccine elicits a strong CD4+ Th-1 cell response, with TNF $\alpha$ , IFN $\gamma$ , and IL-2 expression increased following administration(178-180), while neutralising antibody titres have been shown to significantly increase up until around 28 days following the second dose of the vaccine, and afterwards remain consistently high(181). Fatigue, muscle pain, headache, chills, joint pain, and injection-site pain/reaction are common adverse effects caused by the mRNA-1273 vaccine(163, 177), while serious adverse effects are often avoided(177, 181). Serious adverse events, including allergic reaction and anaphylaxis are rare, but not inconceivable following mRNA-1273 administration(163). Table 2 outlines clinical trial and real-world data for vaccine effectiveness.*

#### 6.5 Other WHO emergency use listed COVID-19 vaccines

*In addition to the five COVID-19 vaccines described previously, five other vaccines have gained emergency use listing by the WHO. First, the Sinopharm BBIBP-CorV COVID-19 vaccine (Covilo) was developed by the Beijing Bio-Institute of Biological Products, a subsidiary of China National Biotec Group, and was given WHO emergency use listing on 7th May 2021(158). This vaccine is a 19nCoV-CDC-Tan-HB02 strain SARS-CoV-2 antigen that is produced in Vero cells, inactivated by  $\beta$ -propiolactone, and then purified and absorbed with aluminium hydroxide(182). Next, the CoronaVac vaccine, developed by Sinovac Biotech (Beijing, China), was listed for WHO emergency use on 1st June 2021(158). Like the BBIBP-CorV vaccine, this vaccine is a Vero cell-based, aluminium hydroxide-adjuvanted,  $\beta$ -propiolactone-inactivated vaccine, however, it is based on the SARS-CoV-2 CZ02 strain(183). Covaxin (BBV152) is a whole virion inactivated SARS-CoV-2 vaccine formula developed by Bharat Biotech International Ltd (India)(184) which gained emergency use listing from the WHO On 3rd November 2021(185). Lastly, Covovax and its originator, Nuvaxovid (NVX-CoV2372), were both developed by Novavax (Maryland, United States) and the Coalition for Epidemic Preparedness Innovations (Oslo, Norway), and gained emergency use listing on 17th and 21st December 2021, respectively(186, 187). Both vaccines are manufactured using the same technology, and consist of a recombinant SARS-CoV-2 S protein nanoparticle administered with the adjuvant Matrix-M as a co-formulation(188). These vaccines produce similar immune responses to those already discussed. Studies assessing the efficacy of these vaccines are outlined in table 2.*

#### 6.10 Other approved vaccines

*In addition to the vaccines that have received emergency use listing from the WHO, around the world, vaccines have been developed, tested and approved to combat COVID-19. As of 24th January 2022, 33 vaccines, including the ten described above, have been approved in at least one country(4). The remaining 23 approved vaccines are outlined in table 3."*

#### Comment

9. Overall, I appreciate the section "6.8 Waning immunity and boosters" but perhaps it would also merit if the interval between the 2nd and 3rd vaccine could be outlined.

#### Response

1 Thank you, we have now added the following statement that outlines the recommended  
2 time interval between the 2<sup>nd</sup> and 3<sup>rd</sup> doses:

3 *“Based on current evidence, the CDC recommend that the time interval for receiving a booster  
4 following the primary regimen is five months for Pfizer/BioNTech BNT162b2 primary regimen, six  
5 months for Moderna mRNA-1273 primary regimen, and two months for Johnson & Johnson  
6 Ad26.COVS primary regimen(216).”*

7  
8  
9 **Reviewer: 2**

10 Major comments:

11  
12  
13 **Comment**

- 14  
15 1. Although this is not a systematic review, selecting 227 articles from the enormous covid-19  
16 literature, especially including bioRxiv and medRxiv, must involve many layers of judgment. It'd be  
17 important to include more details on this selection than currently-included two sentences.

18  
19  
20 **Response**

21 Thank you for this comment. As mentioned in the editor's comment 3, we have included  
22 more detail on the selection criteria that we used in the methods section, and more so in  
23 the supplementary file.

24  
25  
26 **Comment**

- 27  
28 2. Dating: Tables 1 & 2, either in the table or legends need to clearly mark the data and definitions are  
29 as of [mm/dd/yyyy], as the authors acknowledged all these variant classification/vaccine data are  
30 dynamic.

31  
32  
33 **Response**

34  
35 *Thank you, the dynamic nature of this topic does require a time stamp like this. In the legend  
36 of table 1, we have now included that “information is correct as of 24<sup>th</sup> January 2021”. While  
37 in table 2, we have added the dates which the studies took place to and from in order to give  
38 clarity on these data. Similarly we have included the date when information was correct  
39 from in table 3.*

40  
41  
42 **Comment**

- 43  
44 3. Large variations in vaccine effectiveness %: could these possibly be explained by the country/study  
45 date/variants of the publications that were listed? Table 2 made it evident that there were variable  
46 sample sizes and COVID-19 definition of VE against (and in some cases variants), but it remains  
47 unclear to the reader why there could be such large variations.

48  
49  
50 **Response**

51 We agree that the large variations in vaccine effectiveness reported by studies are confusing  
52 and required clarification. We have explained in section 5 why these variations may occur:  
53 *“Numerous studies have explored the effectiveness of approved vaccines, however, large  
54 variations in vaccine effectiveness are reported. This variability is likely due to several factors  
55 in the studies including, the country, date, and population size of the study, as well as the  
56 SARS-CoV-2 variants circulating during the study period. These factors, along with how the  
57 effectiveness is reported, mean that it is difficult to compare vaccines and fully understand  
58 how effective each vaccine is. Here, we review the COVID-19 vaccines in use around the  
59 world.”*



**Comment**

- 1  
2  
3  
4  
5  
6  
7  
8  
9
4. Considerations for the future: The reviewer feels this is the weakest part of the review manuscript, making only vague/broad statements, not considering examples where covid-19 was controlled (ex. Taiwan, New Zealand). Even in countries with fluctuations, some key approaches have worked but are not discussed here. Ex. The rollout of rapid-testing and quarantine of positive cases, especially given asymptomatic individuals can also spread infections.) This part needs to be largely improved upon or toned down in the abstract.

**Response**

10  
11  
12  
13  
14  
15  
16

*Thank you, we agree with this comment and therefore have re-written this section to include two main parts; what went wrong, and what went right when attempting to control COVID-19:*

17  
18

*“9. Considerations for the future*

19  
20  
21  
22  
23  
24  
25  
26  
27  
28  
29  
30  
31  
32  
33  
34  
35  
36  
37  
38  
39  
40  
41  
42  
43

*Novel infectious diseases and pandemics are an unpredictable but inevitable aspect of nature and it is, therefore, important that we learn from past pandemics to prepare for future ones. Firstly, the COVID-19 pandemic has highlighted and amplified the existing inequalities within society(234), with non-white ethnicity, social disadvantage, and unemployment all risk factors for testing positive for COVID-19(235) and those most economically deprived found to be particularly vulnerable(236). These inequalities require addressing in order to be better prepared for similar situations in the future. Next, to progress through a pandemic we should be racing the pathogen, not each other. This statement becomes apparent when you consider the problems countries faced when seeking out PPE(237), and the vaccine inequity seen around the world(238), with developed countries often better placed to be able to purchase these items. Initiatives such as the WHO’s COVAX programme are vital in order to protect those most vulnerable and reduce the global spread of disease. In October 2021, the UK government released a publication outlining where the policies implemented to reduce the impact of the COVID-19 pandemic failed, and the lessons learned from these failures (239). Here, it is clear that there is room for improvement, with the publication presenting conclusions and recommendations on how to enhance pandemic preparedness, lockdown and social distancing measures, testing and contact tracing, social care, and vaccines. In countries such as the UK, US, and much of Europe, where the COVID-19 death rate has been high, steps need to be taken and lessons need to be learnt in order to be better prepared for the next pandemic. The responsibility of improving pandemic response lies with policy makers, the medical/scientific community, and the public, and will ultimately require a collaborative approach.*

44  
45  
46  
47  
48  
49  
50  
51  
52  
53  
54  
55  
56  
57  
58  
59  
60

*Certain aspects of the response to the COVID-19 pandemic have been a triumph, however. One of the major victories was the rapid development and rollout of vaccines(240), which continue to be effective. The rollout of rapid testing and quarantine for positive cases was also important to at least disrupt the spread of the virus, especially given that asymptomatic individuals can contribute to the spread. Furthermore, the swift identification and sharing of knowledge of SARS-CoV-2 variants between countries should be applauded. Lessons can be learned from countries where COVID-19 was controlled. In Taiwan, managing the pandemic as directed by pre-COVID-19 pandemic plans prompted an immediate response; screening of all airline passengers arriving from Wuhan and high risk areas, restricting entry for non-Taiwanese citizens, 14-day quarantine period for contacts of confirmed cases or returning travellers, a ban on large gatherings, and widespread mask wearing were some of the quickly implemented management strategies(241). New Zealand implemented similarly effective restrictions, with the addition of a national lockdown(241). Many of the pandemic control components that kept case and death numbers low in Taiwan and New Zealand could be adopted by other countries in the future and may lead to greater outcomes in terms of protecting both health of individuals and the health and wellbeing of the country. Overall, there is much to be*

1 *learnt from the COVID-19 pandemic and, as we emerge from it, inspection of which policies failed,*  
2 *and which succeeded are imperative.”*

3 Minor comments:

4  
5 **Comment**

- 6  
7 1. Table 1 is a great summary of variants, if journal format allows, color-coding the mutations could  
8 allow people to quickly digest which variants share which mutations.  
9

10 **Response**

11  
12 *Thank you, we agree that colour coding the mutations shared by different variants make it*  
13 *clearer to quickly digest the information, so have colour coded the mutations accordingly.*  
14  
15

16 **Comment**

- 17  
18 2. Figure 1, the texts in the figures (ex. D614G, ORF6, variant designations) could be enlarged  
19

20 **Response**

21  
22 Thank you, the text in figure 1 has been enlarged to make for easier reading.  
23  
24  
25

26 **Reviewer: 3**

27  
28 **Comment**

- 29  
30 1. This review was not written in the systematic review format, which authors can use the statistical  
31 method to measurement the significant different between virology variant and vaccine aspects.  
32

33 **Response**

34  
35 *Thank you for this comment. As this is not a systematic review in the strictest sense, we*  
36 *believe that this is difficult. We have aimed to explore the relationships between vaccines*  
37 *and circulating variants where possible, for example, where vaccine effectiveness against*  
38 *certain variants is stated in articles, we include it in table 2, while the dates that studies took*  
39 *place from and to are included and can be correlated with circulating variants.*  
40  
41

42 **Comment**

- 43  
44 2. The criteria of choosing and exclude scientific data / paper need to be explained to eliminated the  
45 potential bias.  
46

47 **Response**

48  
49 *Thank you, as mentioned in previous responses, we have updated the methods section and*  
50 *included a supplementary file to explain our search and inclusion criteria.*  
51  
52

53 **Comment**

- 54  
55 3. Since, the severity of diseases did not depend on only viral genetic, host, and immune status, as  
56 well as significant risk factors, but also depend on medical treatment and duration of onset in each  
57 data set which are important confounding factors.  
58

59 **Response**

1  
2  
3  
4  
5  
6  
7  
8  
9  
10  
11  
12  
13  
14  
15  
16  
17  
18  
19  
20  
21  
22  
23  
24  
25  
26  
27  
28  
29  
30  
31  
32  
33  
34  
35  
36  
37  
38  
39  
40  
41  
42  
43  
44  
45  
46  
47  
48  
49  
50  
51  
52  
53  
54  
55  
56  
57  
58  
59  
60

*Indeed, duration of disease and the treatment patients receive are important factors in determining the severity of disease patients endure, we have included the following statement to cover this:*

“The duration of symptoms endured by COVID-19 patients, as well as the treatment they receive will also have profound influences on the severity of disease they experience and both the acute and long-term outcomes following recovery.”

#### Comment

4. Most of review data are not suitable for publication in the modern scientific format but can be re-written with additional level of evidence based medicine.

#### Response

*We believe that the review is written in a concise and methodical manner with all comments supported by published evidence and suitable data.*

#### Comment

5. The basic knowledge and 3D structure of spike RBD and NTD molecule in each mutation and vaccine sequence antibody (MRNA)/ (VIRAL VECTORS) should be reviewed if authors want to determine the correlation of vaccine efficacy and variant of SARS-CoV-2. The authors can use the essential real world data of vaccine effectiveness to determine the response of vaccine across the variant in different time and place of epidemic.

#### Response

*Thank you. Due to the limited word count available, it was not possible to explain the spike protein 3D structure changes caused by each mutation, however we have detailed the structure of the spike protein and where the mutations are located within the spike. We have indicated that mutations within the spike alter its 3D structure and influence immune escape:*

*Section 4:*

*“The subunits of the trimeric S complex are either in a closed (pre-fusion stage) or open (post-fusion stage) conformation(62), with one subunit always in an open conformation to allow for ACE2 recognition and binding(63). The RBD itself consists of five anti-parallel  $\beta$ -strands surrounded by several  $\alpha$ -helices(64). From closed to open conformation, the RBD undergoes structural rearrangement whereby the globular head region rotates clockwise, which alters its electrostatic surface(64). Once positioned, numerous residues within the RBD form either hydrogen bonds or salt bridges with residues of the ACE2 receptor, allowing for tight binding(65), while the concave structure of the RBD allows for three distinct binding regions(64).*

*Section 5:*

*“Many of the mutations observed in SARS-CoV-2 variants are found within the RBD or the N-terminal domain of the S protein, which alters the three-dimensional structure of the S protein. Not only can these changes affect the transmission abilities of the virus, but can also allow it to better escape the immune response, including from neutralising antibodies either elicited through vaccine administration or natural infection.”*

#### Comment

6. The booster dose data should be reviewed in term of antibody response and T cell response.

#### Response

*Thank you, we agree with this and we have now included some discussion of antibody and T-cell responses following booster dose:*

<https://mc.manuscriptcentral.com/bmjmedicine>

1  
2  
3  
4  
5  
6  
7  
8  
9  
10  
11  
12  
13  
14  
15  
16  
17  
18  
19  
20  
21  
22  
23  
24  
25  
26  
27  
28  
29  
30  
31  
32  
33  
34  
35  
36  
37  
38  
39  
40  
41  
42  
43  
44  
45  
46  
47  
48  
49  
50  
51  
52  
53  
54  
55  
56  
57  
58  
59  
60

*“Since booster programmes began, evidence that a booster vaccine dose enhances antibody and cellular responses has accumulated. Following a third dose of vaccine, neutralising antibody titres increase significantly(199-202) and, in some cases, to higher levels than after the primary two doses(199). Additionally, boosters have also been found to increase neutralising antibody titres against Beta, Gamma, Delta, and Omicron variants(200, 203, 204). T-cell response is also enhanced following a third dose(201, 205, 206). Together, enhancing neutralising antibody and cellular responses with a booster vaccine dose is likely to provide a greater level of protection than relying on immunity built through a primary regimen.”*

#### **Reviewer: 4**

#### **Comment**

##### 1) Introduction

- Line 22 - can you include the difference between VOI and VUM? e.g. in VUM evidence of phenotypic or epidemiological effect is currently unclear, and a name has not yet been assigned.

#### **Response**

*Thank you, we agree that the differences between VOC, VUI and VUM should have been defined more clearly to include the difference between each. We have updated this as follows:*

*“The World Health Organisation (WHO) classify SARS-CoV-2 variants that increase transmissibility, disease severity or virulence, or decrease the effectiveness of public health measures, diagnostics, therapeutics or vaccines as variants of concern (VOC). Variants with genetic changes that are predicted to enhance the virulence and transmissibility of the virus which have been identified to cause community transmission in multiple countries posing a possible risk to global public health are defined as variants of interest (VOI). Lastly, the WHO defines variants with genetic changes that are suspected to affect virus characteristics and have currently unclear phenotypic or epidemiological effects as variants under monitoring (VUM). VUM are not typically assigned a name until they are upgraded to VOI or VOC. The full working definitions of VOC, VOI and VUM can be found on the WHO ‘tracking SARS-CoV-2 variants’ website: [www.who.int/en/activities/tracking-SARS-CoV-2-variants/\(3\)](http://www.who.int/en/activities/tracking-SARS-CoV-2-variants/(3)).”*

#### **Comment**

##### 2) Methods

- Including the specifics of how the searches were done would add clarity (maybe as a supplementary file), many of the terms which were searched for are not specific

#### **Response**

*Thank you, clarity on the search terms and selection criteria was needed. We have included a supplementary file which includes the specific search terms that we used as well as the selection criteria that was implemented for different sections of the review.*

#### **Comment**

##### 3) Transmission

- Line 32 - maybe use "biological material" instead of "biological samples", presumably the virus doesn't normally spread via the samples themselves

#### **Response**

*Thank you, this has been changed from “biological samples” to “biological material”*



**Comment**

## 4) Virology

Page 6

line 8 typo - "interacting WITH host cell organelles"

line 25 - both halves of this sentence are talking about TMPRSS2 but it doesn't sound like it

**Response**

*Thank you, these errors have been corrected:*

*“with” has now been inserted into “interacting WITH host cell organelles”.*

*The TMPRSS2 sentence has been amended:*

*“Meanwhile, TMPRSS2, a host cell protease, facilitates fusion of the viral and host cell membranes(68), and may play a role in the spread of the virus in the airways(68).”*

**Comment**

## 5) VOC

- You frequently refer to an increase in these variants, and state or imply that this is relative to the wild-type. Can you include a section at the start of 5 where you specify what that wild-type is? Is it clear that samples from a particular time period or geographic area are wild-type?

**Response**

*Thank you. We agree that simply using ‘wild-type’ to discuss a SARS-CoV-2 strain is confusing. Firstly, we have changed this wording to refer to the initial strain that emerged from Wuhan as the ‘primary strain, and have described what is meant by that at the end of section 5:*

*“Herein, we report studies that compare SARS-CoV-2 variants to the ‘primary’ virus strain. ‘Primary strain’ refers to the strain of the virus that first emerged in Wuhan, China at the end of 2019 and spread around the world in the first wave of infections, which is often also referred to as the Wuhan-Hu-1, B.1, or wild-type strain.”*

**Comment**

## 6) VOC - Alpha

line 22 typo "probable" not "probably"

line 48 typo "de-escalated"

**Response**

*Thank you for highlighting these errors.*

*Due to re-wording of this section, “probably” has now been removed, while “de-escalated” has been amended.*

**Comment**

## 7) 5.1.4 VOC – Delta

- p10 48 Transmissibility of Delta is 97% greater, or three times Alpha, Beta and Gamma?
- p10 54 Isn't replication rate a factor in transmissibility rather than an addition to it?
- p11 line 27 - when you talk about younger people, can you specify which age cutoff you are talking about?

**Response**

1 *Thank you for identifying this.*

2 *The transmissibility sentence was worded poorly in the original manuscript, this has been*  
 3 *amended to explain exactly what is meant:*

4 *“It was estimated that the reproduction number of the Delta variant is 97% greater than non-*  
 5 *VOC/VOI and approximately three times that of the Alpha, Beta, and Gamma variants(110),”*  
 6  
 7

8 *We agree that replication rate is a factor in transmissibility, therefore we have amended this*  
 9 *sentence:*

10 *“The fast replication rate of Delta likely contributes to its increased transmissibility compared to*  
 11 *Alpha, Beta, and Gamma.”*  
 12  
 13

14 *We also agree that it was unclear what “younger people” meant, we have amended the*  
 15 *statement as follows:*

16 *“Lastly, a study in India found that the risk of death was around 1.8 times higher for Delta infections,*  
 17 *while Delta also infected and induced symptoms in a greater proportion of younger people (0-19*  
 18 *years old), compared to the primary strain(131).”*  
 19  
 20  
 21

## 22 **Comment**

23  
 24 8) Vaccination 6.1 Pfizer  
 25 line 15 - typo repeating "elicit a strong"

26  
 27  
 28 6.3 Johnson and Johnson  
 29 - Line 9 a bit unclear, is the point that there is a time lag of around 28 days before peak  
 30 effectiveness? After second dose? And compared with how many days?  
 31

32 6.6 Sinovac  
 33 Line 6 - typo "alike" should be "like"

34  
 35 6.8 Boosters  
 36 Line 56 typo "On 30th July 2021" appears twice  
 37  
 38

## 39 **Response**

40  
 41 *Thank you.*

42 *Repetition of “elicit a strong” has been corrected.*

43 *Due to re-wording of the manuscript, the statement commenting on the time lag of around*  
 44 *28 days before peak effectiveness has been removed.*

45 *“like” now replaces “alike” within the Sinovac section.*

46 *“like” now replaces “alike” within the Sinovac section.*  
 47 *The second appearance of “On 30th July 2021” has been removed.*  
 48  
 49

## 50 **Comment**

51 8 Conclusions

52  
 53 - Line 23 "Yet to be eradicated" - this is absolutely true; but this is unlikely to happen for decades if  
 54 ever, and there are other more immediate unmet goals it might be better to mention, such as  
 55 attaining high vaccination coverage globally, ensuring all health systems have the capacity to cope  
 56 with seasonal waves.  
 57  
 58

## 59 **Response**

60 *Thank you, we agree that “yet to be eradicated” is possibly a misleading statement. We have*  
*amended this part of the conclusion as follows:*

<https://mc.manuscriptcentral.com/bmjmedicine>

1  
2  
3  
4  
5  
6  
7  
8  
9  
10  
11  
12  
13  
14  
15  
16  
17  
18  
19  
20  
21  
22  
23  
24  
25  
26  
27  
28  
29  
30  
31  
32  
33  
34  
35  
36  
37  
38  
39  
40  
41  
42  
43  
44  
45  
46  
47  
48  
49  
50  
51  
52  
53  
54  
55  
56  
57  
58  
59  
60

*“Although rollout of vaccines has been successful, we must aim to address unmet goals, such as attaining a high global vaccination coverage and ensuring that all healthcare systems have the capacity to cope with seasonal waves.”*

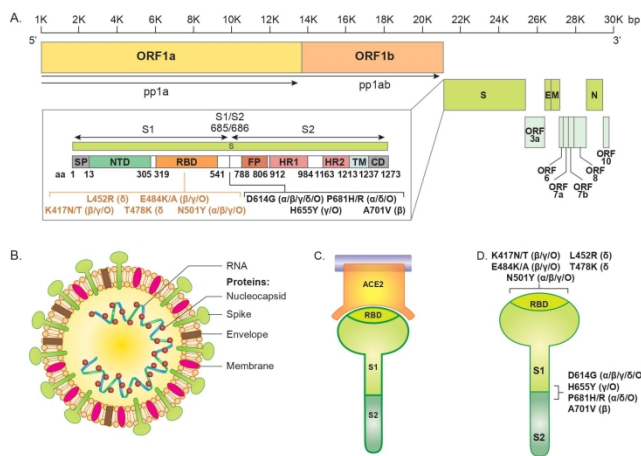

Figure 1: Genome and structure of SARS-CoV-2.

210x297mm (300 x 300 DPI)

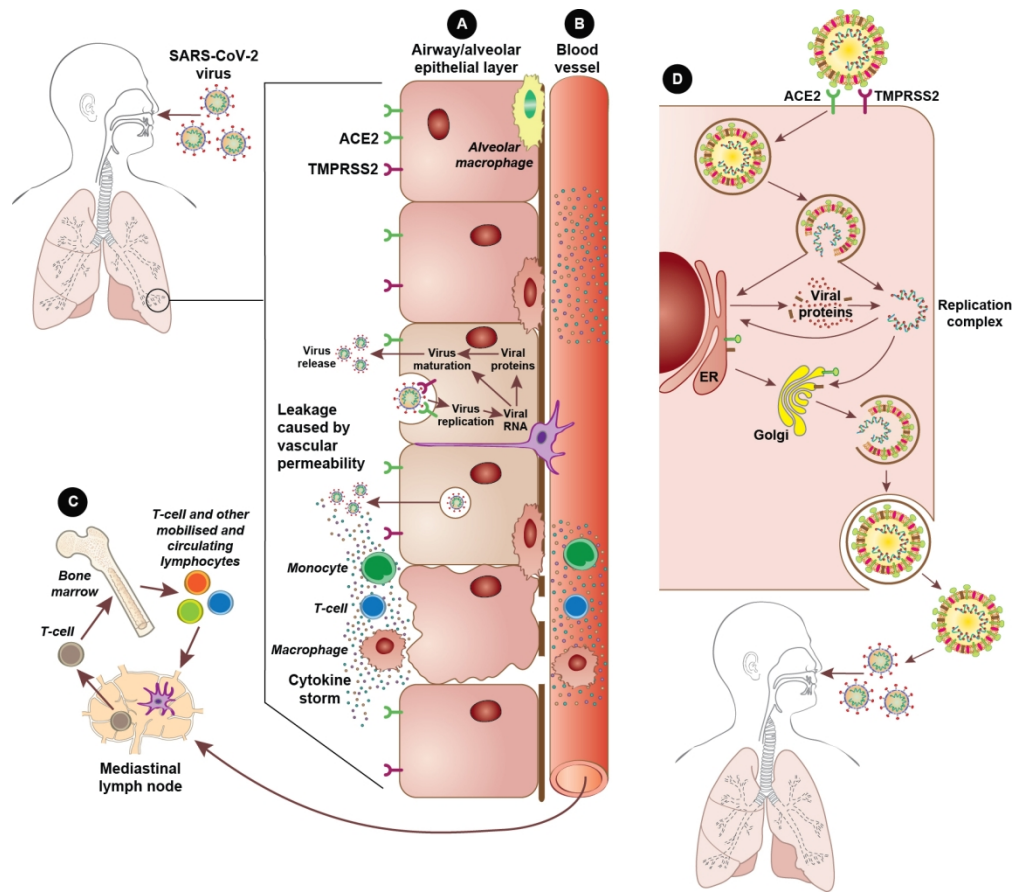

Figure 2: Viral entry and host response.

153x135mm (300 x 300 DPI)

| Variants of concern             |                                 |                                 |            |       |       |                          |                              |                                     |
|---------------------------------|---------------------------------|---------------------------------|------------|-------|-------|--------------------------|------------------------------|-------------------------------------|
| WHO nomenclature or designation | Pango Lineage                   | S protein mutations of interest |            |       |       |                          | First detected samples *     |                                     |
| Alpha                           | B.1.1.7                         | N501Y                           | D614G      | P681H |       |                          | UK, Sept 2020                |                                     |
| Beta                            | B.1.351                         | N501Y                           | D614G      | E484K | K417N | A701V                    | South Africa, May 2020       |                                     |
| Gamma                           | P.1                             | N501Y                           | D614G      | E484K | K417T | H655Y                    | Brazil, Nov 2020             |                                     |
| Delta                           | B.1.617.2                       | L452R                           | D614G      | P681R | T478K |                          | India, Oct 2020              |                                     |
| Omicron                         | B.1.1.529                       | N501Y                           | D614G      | E484A | P681H | K417N                    | H655Y                        | South Africa and Botswana, Nov 2021 |
|                                 |                                 | A67V                            | Δ69-70     | T95I  | G142D | Δ143-145                 | N211I                        |                                     |
|                                 |                                 | Δ212                            | ins215EPE  | G339D | S371L | S373P                    | S375F                        |                                     |
|                                 |                                 | N440K                           | G446S      | S477N | T478K | Q493R                    | G496S                        |                                     |
|                                 |                                 | Q498R                           | Y505H      | T547K | N679K | N764K                    | D796Y                        |                                     |
|                                 |                                 | N856K                           | Q954H      | N969K | L981F |                          |                              |                                     |
| Variants of Interest            |                                 |                                 |            |       |       |                          |                              |                                     |
| WHO nomenclature or designation | Pango Lineage                   | S protein mutations of interest |            |       |       |                          | First detected samples *     |                                     |
| Lambda                          | C.37                            | L452Q                           | D614G      | F490S |       |                          | Peru, Dec 2020               |                                     |
| Mu                              | B.1.621                         | N501Y                           | D614G      | P681H | R346K | E484K                    | Columbia, Jan 2021           |                                     |
| Variants under monitoring       |                                 |                                 |            |       |       |                          |                              |                                     |
| Pango Lineage                   | S protein mutations of interest |                                 |            |       |       | First detected samples * |                              |                                     |
| B.1.1.318                       |                                 | D614G                           | P681H      | E484K |       |                          | Multiple countries, Jan 2021 |                                     |
| C.1.2                           |                                 | N501Y                           | D614G      | E484K | H655Y | N679K                    | Y449H                        | South Africa, May 2021              |
| B.1.640                         |                                 | N501Y                           | D614G      | P681H | F490R | N394S                    | R346S                        | Multiple countries, Sep 2021        |
|                                 |                                 | Y449N                           | 137-145del |       |       |                          |                              |                                     |

| Vaccine and vaccine type                         | Recommended dose and administration                                                                             | Study ref.                                                                                 | Study type                  | Study date and location(s)                                                           | N            | Vaccine effectiveness % (95% confidence interval) * |                                |                        |  |  |
|--------------------------------------------------|-----------------------------------------------------------------------------------------------------------------|--------------------------------------------------------------------------------------------|-----------------------------|--------------------------------------------------------------------------------------|--------------|-----------------------------------------------------|--------------------------------|------------------------|--|--|
|                                                  |                                                                                                                 |                                                                                            |                             |                                                                                      |              | Against                                             | One dose                       | Two doses              |  |  |
| Pfizer/BioNtech (BNT162b2) – mRNA.               | Two doses (30µg, 0.3ml each) intramuscularly (deltoid) with a recommended interval of 21-28 days between doses. | (156)                                                                                      | Randomised controlled trial | 27/7/2020 to 14/11/2020<br>US, Argentina, Brazil, South Africa, Germany, and Turkey. | 37,706       | Symptomatic infection                               |                                | 95% (90.3–97.6%)       |  |  |
|                                                  |                                                                                                                 | (241)                                                                                      | Observational               | 20/12/2020 to 1/2/2021<br>Israel.                                                    | 1,193,236    | Documented infection                                | 46% (40-51%)                   | 92% (88-95%)           |  |  |
|                                                  |                                                                                                                 |                                                                                            |                             |                                                                                      |              | Symptomatic infection                               | 57% (50-63%)                   | 94% (87-98%)           |  |  |
|                                                  |                                                                                                                 |                                                                                            |                             |                                                                                      |              | Hospitalisation                                     | 74% (56-86%)                   | 87% (55-100%)          |  |  |
|                                                  |                                                                                                                 |                                                                                            |                             |                                                                                      |              | Severe disease                                      | 62% (39-80%)                   | 92% (75-100%)          |  |  |
|                                                  |                                                                                                                 | (242)                                                                                      | Test-negative case-control  | 26/10/2020 to 16/5/2021<br>UK.                                                       | 19,109       | Infection with Alpha                                | 47.5% (41.6–52.8%)             | 93.7% (91.6–95.3%)     |  |  |
|                                                  |                                                                                                                 |                                                                                            |                             |                                                                                      |              | Infection with Delta                                | 35.6% (22.7–46.4%)             | 88.0% (85.3–90.1%)     |  |  |
|                                                  |                                                                                                                 | (243)                                                                                      | Test-negative case-control  | 1/2/2021 to 31/3/2021<br>Qatar.                                                      | 213,758      | Infection with Beta                                 |                                | 75.0% (70.5-78.9%)     |  |  |
|                                                  |                                                                                                                 |                                                                                            |                             |                                                                                      |              | Infection with Alpha or Beta                        |                                | 97.4% (92.2-99.5%)     |  |  |
|                                                  |                                                                                                                 | (244)                                                                                      | Test-negative case-control  | 14/12/2020 to 19/4/2021<br>Canada.                                                   | 324,033      | Symptomatic infection                               | 14-20 days: 48% (41-54%)       | ≥7 days: 91% (89-93%)  |  |  |
|                                                  |                                                                                                                 |                                                                                            |                             |                                                                                      |              |                                                     | ≥14 days: 60% (57-64%)         |                        |  |  |
|                                                  |                                                                                                                 |                                                                                            |                             |                                                                                      |              |                                                     | 35-41 days: 71% (63-78%)       |                        |  |  |
|                                                  |                                                                                                                 |                                                                                            |                             |                                                                                      |              | Hospital admission or death                         | 14-20 days: 62% (44-75%)       | ≥7 days: 98% (88-100%) |  |  |
|                                                  |                                                                                                                 |                                                                                            |                             |                                                                                      |              |                                                     | ≥14 days: 70% (60-77%)         |                        |  |  |
|                                                  |                                                                                                                 |                                                                                            |                             |                                                                                      |              |                                                     | ≥35 days: 91% (73-97%)         |                        |  |  |
|                                                  |                                                                                                                 | [NOTE: Participants in this study received an mRNA vaccine (either BNT162b2 or mRNA-1273)] |                             |                                                                                      |              |                                                     |                                |                        |  |  |
|                                                  |                                                                                                                 | (245)                                                                                      | Test-negative case-control  | 14/12/2020 to 3/8/2021<br>Canada.                                                    | 682,071      | Symptomatic infection - Alpha                       | ≥14 days: 66% (95% CI: 64-68%) | ≥7 days: 89% (86–91%)  |  |  |
|                                                  |                                                                                                                 |                                                                                            |                             |                                                                                      |              | Symptomatic infection - Beta or Gamma variants      | ≥14 days: 60% (52-67%)         | ≥7 days: 84% (69–92%)  |  |  |
|                                                  |                                                                                                                 |                                                                                            |                             |                                                                                      |              | Symptomatic infection - Delta                       | ≥14 days: 56% (45-64%)         | ≥7 days: 87% (64–95%)  |  |  |
|                                                  |                                                                                                                 |                                                                                            |                             |                                                                                      |              | Against hospitalisation or death - Alpha            | ≥14 days: 80% (78-82%)         | ≥7 days: 95% (92-97%)  |  |  |
| Against hospitalisation or death - Beta or Gamma | ≥14 days: 77% (69-83%)                                                                                          |                                                                                            |                             |                                                                                      |              | ≥7 days: 95% (81-99%)                               |                                |                        |  |  |
| Against hospitalisation or death - Delta         | ≥14 days: 78% (65-86%)                                                                                          |                                                                                            |                             |                                                                                      |              |                                                     |                                |                        |  |  |
| (246)                                            | Retrospective case-control                                                                                      | January to July 2021<br>US.                                                                | 119,463                     | Infection                                                                            |              | ≥14 days: 86% (81-90.6%)                            |                                |                        |  |  |
|                                                  |                                                                                                                 |                                                                                            |                             | Hospitalisation                                                                      |              | ≥14 days: 85% (73-93%)                              |                                |                        |  |  |
|                                                  |                                                                                                                 |                                                                                            |                             | Admission to an ICU                                                                  |              | ≥14 days: 87% (46-98.6%)                            |                                |                        |  |  |
| (133)                                            | Test-negative observational                                                                                     | 1/4/2021 to 6/6/2021<br>Scotland.                                                          | 400,827                     | Infection - Alpha                                                                    |              | 92% (90–93%)                                        |                                |                        |  |  |
|                                                  |                                                                                                                 |                                                                                            |                             | Infection - Delta                                                                    |              | 79% (75-82%)                                        |                                |                        |  |  |
| (247)                                            |                                                                                                                 |                                                                                            | 14,019                      | Hospitalisation - Alpha                                                              | 83% (62-93%) | 95% (78-99%)                                        |                                |                        |  |  |

|  |       |  |                            |                                  |                                     |                                 |                               |                              |
|--|-------|--|----------------------------|----------------------------------|-------------------------------------|---------------------------------|-------------------------------|------------------------------|
|  |       |  | Test-negative case-control | 12/4/2021 to 4/6/2021 England.   |                                     | Hospitalisation - Delta         | 94% (46-99%)                  | 96% (86-99%)                 |
|  | (248) |  | Test-negative case-control | 8/12/2020 to 19/2/2021. England. | 156,930                             | Infection                       |                               | 10-13 days: 70% (59-78%)     |
|  |       |  |                            |                                  |                                     |                                 |                               | ≥14 days: 89% (85-93%)       |
|  |       |  |                            |                                  |                                     |                                 |                               | 28-34 days: 61% (51-69%)     |
|  | (249) |  | Test-negative case-control | 4/4/2021 to 1/5/2021 Canada.     | 16,993                              | Infection                       | 0-13 days: 14% (0-26%)        |                              |
|  |       |  |                            |                                  |                                     |                                 | 14-20 days: 43% (30-53%)      |                              |
|  |       |  |                            |                                  |                                     |                                 | 35-41 days: 75% (63-83%)      |                              |
|  |       |  |                            |                                  |                                     | Infection                       |                               | ≥21 days: 65% (58-71%)       |
|  |       |  |                            |                                  |                                     | Infection - non-VOC             |                               | 72% (58-81%)                 |
|  |       |  |                            |                                  |                                     | Infection - Alpha               |                               | 67% (57-75%)                 |
|  |       |  |                            |                                  |                                     | Infection - Gamma               |                               | 61% (45-72%)                 |
|  | (250) |  | Test-negative case-control | 17/1/2021 to 5/6/2021 Canada.    | 5,8476                              | Infection                       | ≥14 days: 70.3% (68.1-72.4%)  | ≥7 days: 85.5% (80.4-89.3%)  |
|  | (251) |  | Case-control               | 14/2/2021 to 3/5/2021 France.    | 67,760                              | Infection                       |                               | ≥7 days: 88% (81-92%)        |
|  |       |  |                            |                                  |                                     | Infection - Alpha               |                               | ≥7 days: 86% (81-90%)        |
|  |       |  |                            |                                  |                                     | Infection - Beta/Gamma          |                               | ≥7 days: 77% (63-86%)        |
|  | (252) |  | Test-negative case-control | 23/3/2021 to 7/9/2021 Qatar.     | 1 dose: 906,078<br>2 doses: 877,354 | Infection – Delta               | 65.5% (40.9-79.9%)            | ≥14 days: 59.6% (50.7-66.9%) |
|  |       |  |                            |                                  |                                     | Severe disease or death - Delta |                               | 97.3% (84.4-99.5%)           |
|  | (192) |  | Test-negative case-control | 1/1/2021 to 5/9/2021 Qatar.      | 1 dose: 947,035<br>2 doses: 907,763 | Symptomatic infection           | 0-13 days: -5.5% (-12.9-1.4%) |                              |
|  |       |  |                            |                                  |                                     |                                 | ≥14 days: 47.9% (43.6-51.9%)  |                              |
|  |       |  |                            |                                  |                                     |                                 | 1 month: 81.5% (79.9-83.0%)   |                              |
|  |       |  |                            |                                  |                                     |                                 | 2 months: 72.5% (69.6-75.1%)  |                              |
|  |       |  |                            |                                  |                                     |                                 | 3 months: 70.6% (66.4-74.3%)  |                              |
|  |       |  |                            |                                  |                                     |                                 | 4 months: 57.0% (48.6-64.0%)  |                              |
|  |       |  |                            |                                  |                                     |                                 | 5 months: 12.0% (-6.1-27.1%)  |                              |
|  |       |  |                            |                                  |                                     |                                 | 6 months: 12.8% (-9.1-30.3%)  |                              |
|  |       |  |                            |                                  |                                     | ≥7 months: 27.8% (-1.4-48.7%)   |                               |                              |
|  |       |  |                            |                                  |                                     | Hospitalisation and death       | 0-13 days: 7.5% (-11.9-23.6%) |                              |
|  |       |  |                            |                                  |                                     |                                 | ≥14 days: 65.0% (55.0-72.8%)  |                              |
|  |       |  |                            |                                  |                                     |                                 | 1 month: 95.9% (93.6-97.3%)   |                              |
|  |       |  |                            |                                  |                                     |                                 | 2 months: 96.3% (92.9-98.0%)  |                              |
|  |       |  |                            |                                  |                                     |                                 | 3 months: 93.4% (87.5-96.5%)  |                              |
|  |       |  |                            |                                  |                                     |                                 | 4 months: 80.8% (56.9-91.4%)  |                              |
|  |       |  |                            |                                  |                                     |                                 | 6 months: 81.8% (18.5-95.9%)  |                              |
|  |       |  |                            |                                  |                                     | ≥7 months: 44.1% (-86.5-83.3%)  |                               |                              |
|  | (253) |  | Prospective cohort         | 7/12/2020 to 5/2/2021            | 23,324                              | Infection                       | ≥21 days: 70% (55-85%)        | ≥7 days: 85% (74-96%)        |

1  
2  
3  
4  
5  
6  
7  
8  
9  
10  
11  
12  
13  
14  
15  
16  
17  
18  
19  
20  
21  
22  
23  
24  
25  
26  
27  
28  
29  
30  
31  
32  
33  
34  
35  
36  
37  
38  
39  
40  
41  
42  
43  
44  
45  
46



|    |       |                             |                                                                               |                                  |                                                                                                                       |                                                                                                  |                              |
|----|-------|-----------------------------|-------------------------------------------------------------------------------|----------------------------------|-----------------------------------------------------------------------------------------------------------------------|--------------------------------------------------------------------------------------------------|------------------------------|
|    |       |                             | UK.                                                                           |                                  |                                                                                                                       |                                                                                                  |                              |
| 1  | (254) | Observational               | 24/1/2021 to 3/4/2021 Israel.                                                 | 186,109                          | Infection                                                                                                             |                                                                                                  | ≥7 days: 95.3% (94.9-95.7%)  |
| 2  |       |                             |                                                                               |                                  | Asymptomatic infection                                                                                                |                                                                                                  | ≥7 days: 91.5% (90.7-92.2%)  |
| 3  |       |                             |                                                                               |                                  | Symptomatic infection                                                                                                 |                                                                                                  | ≥7 days: 97.0% (96.7-97.2%)  |
| 4  |       |                             |                                                                               |                                  | Hospitalisation                                                                                                       |                                                                                                  | ≥7 days: 97.2% (96.8-97.5%)  |
| 5  |       |                             |                                                                               |                                  | Severe or critical infection                                                                                          |                                                                                                  | ≥7 days: 97.5% (97.1-97.8%)  |
| 6  |       |                             |                                                                               |                                  | Death                                                                                                                 |                                                                                                  | ≥7 days: 96.7% (96.0-97.3%)  |
| 7  |       |                             |                                                                               |                                  |                                                                                                                       |                                                                                                  |                              |
| 8  | (255) | Observational               | 1/3/2021 to 1/8/2021 US.                                                      | 10,428, 783                      | Infection – Pre-Delta period                                                                                          |                                                                                                  | ≥14 days: 74.2% (68.9-78.7%) |
| 9  |       |                             |                                                                               |                                  | Infection – Intermediate period                                                                                       |                                                                                                  | ≥14 days: 66.5% (58.3-73.1%) |
| 10 |       |                             |                                                                               |                                  | Infection – Delta                                                                                                     |                                                                                                  | ≥14 days: 52.4% (48.0-56.4%) |
| 11 | (256) | Observational               | 14/12/2020 to 14/8/2021 US.                                                   | Delta: 2,840<br>Pre-Delta: 7,012 | Infection – Delta                                                                                                     |                                                                                                  | 14–119 days: 85% (68-93%)    |
| 12 |       |                             |                                                                               |                                  |                                                                                                                       |                                                                                                  | 120–149 days: 81% (34-95%)   |
| 13 |       |                             |                                                                               |                                  |                                                                                                                       |                                                                                                  | ≥150 days: 73% (49-86%)      |
| 14 |       |                             |                                                                               |                                  | Infection – Pre-Delta                                                                                                 |                                                                                                  | 91% (81-96%)                 |
| 15 |       |                             |                                                                               |                                  |                                                                                                                       |                                                                                                  |                              |
| 16 |       |                             |                                                                               |                                  | [NOTE only 65% of participants in this study received BNT162b2 (33% received mRNA-1273, and 2% received Ad26.COV2.S)] |                                                                                                  |                              |
| 17 | (257) | Observational               | 15/1/2021 to 16/4/2021 France.                                                | 378                              | Infection – Beta                                                                                                      |                                                                                                  | ≥7 days: 49% (14-69%)        |
| 18 |       |                             |                                                                               |                                  | Severe disease                                                                                                        |                                                                                                  | ≥7 days: 86% (67-94%)        |
| 19 |       |                             |                                                                               |                                  |                                                                                                                       |                                                                                                  |                              |
| 20 | (258) | Observational               | 1/12/2020 to 1/8/2021 UK.                                                     | 384,543                          | Infection – Alpha                                                                                                     | ≥21 days: 59% (52-65%)                                                                           |                              |
| 21 |       |                             |                                                                               |                                  | Infection – Delta                                                                                                     | ≥21 days: 57% (50-63%)                                                                           |                              |
| 22 |       |                             |                                                                               |                                  | Infection – Alpha                                                                                                     |                                                                                                  | 0-13 days: 77% (66-84%)      |
| 23 |       |                             |                                                                               |                                  |                                                                                                                       |                                                                                                  | ≥14 days: 78% (68-84%)       |
| 24 |       |                             |                                                                               |                                  | Infection – Delta                                                                                                     |                                                                                                  | 0-13 days: 82% (75-87%)      |
| 25 |       |                             |                                                                               |                                  |                                                                                                                       |                                                                                                  | ≥14 days: 80% (77-83%)       |
| 26 |       |                             |                                                                               |                                  |                                                                                                                       |                                                                                                  |                              |
| 27 | (259) | Observational               | April to May 2021. Canada                                                     | 224                              | Infection                                                                                                             |                                                                                                  | 66.2% (2.3-88.3%)            |
| 28 |       |                             |                                                                               |                                  | Symptomatic infection                                                                                                 |                                                                                                  | 25.6% (-157.8-78.5%)         |
| 29 |       |                             |                                                                               |                                  |                                                                                                                       |                                                                                                  |                              |
| 30 | (260) | Retrospective cohort        | 27/12/2020 to 24/3/2021 Italy.                                                | 6,423                            | Infection                                                                                                             | 0-14 days: 47.3% (24.7-63.1%)<br>14-21 days: 84.1% (39.7-95.8%)<br>≥21 days: 85.4% (-35.3-98.4%) | ≥7 days: 95.1% (62.4-99.4%)  |
| 31 |       |                             |                                                                               |                                  | Symptomatic infection                                                                                                 | 0-14 days: 39.9% (9.1-60.3%)<br>14-21 days: 83.3% (14.8-96.7%)<br>≥21 days: 65.9% (-171-95.7%)   | ≥7 days: 93.7% (50.8-99.2%)  |
| 32 |       |                             |                                                                               |                                  |                                                                                                                       |                                                                                                  |                              |
| 33 |       |                             |                                                                               |                                  |                                                                                                                       |                                                                                                  |                              |
| 34 |       |                             |                                                                               |                                  |                                                                                                                       |                                                                                                  |                              |
| 35 | (261) | Randomised controlled trial | 27//7/2020 to 29/10/2020 US, Argentina, Brazil, South Africa, Germany, Turkey | 44,165                           | Infection (without evidence of prior infection)                                                                       |                                                                                                  | ≥7 days: 91.3% (89-93.2%)    |
| 36 |       |                             |                                                                               |                                  | Infection (with evidence of previous infection)                                                                       |                                                                                                  | ≥7 days: 91.1% (88.8-93.0%)  |
| 37 |       |                             |                                                                               |                                  | Infection                                                                                                             | <11 days: 18.2% (-26.1-47.3%)                                                                    | <7 days: 91.5% (72.9-98.3%)  |
| 38 |       |                             |                                                                               |                                  |                                                                                                                       | ≥11 days to second dose: 91.7% (79.6-97.4%)                                                      | ≥7 days: 91.2% (88.9-93.0%)  |
| 39 |       |                             |                                                                               |                                  |                                                                                                                       |                                                                                                  |                              |
| 40 |       |                             |                                                                               |                                  |                                                                                                                       |                                                                                                  |                              |
| 41 |       |                             |                                                                               |                                  |                                                                                                                       |                                                                                                  |                              |
| 42 |       |                             |                                                                               |                                  |                                                                                                                       |                                                                                                  |                              |
| 43 |       |                             |                                                                               |                                  |                                                                                                                       |                                                                                                  |                              |
| 44 |       |                             |                                                                               |                                  |                                                                                                                       |                                                                                                  |                              |
| 45 |       |                             |                                                                               |                                  |                                                                                                                       |                                                                                                  |                              |
| 46 |       |                             |                                                                               |                                  |                                                                                                                       |                                                                                                  |                              |

|  |       |                      |                                  |         |                                                 |                                |                                            |                                                            |                                      |                                       |                                       |
|--|-------|----------------------|----------------------------------|---------|-------------------------------------------------|--------------------------------|--------------------------------------------|------------------------------------------------------------|--------------------------------------|---------------------------------------|---------------------------------------|
|  |       |                      |                                  |         |                                                 |                                | ≥7 days to <2 months: 96.2% (93.3-98.1%)   |                                                            |                                      |                                       |                                       |
|  |       |                      |                                  |         |                                                 |                                | ≥2 months to <4 months: 90.1% (86.6-92.9%) |                                                            |                                      |                                       |                                       |
|  |       |                      |                                  |         |                                                 |                                | ≥4 months: 83.7% (74.7-89.9%)              |                                                            |                                      |                                       |                                       |
|  | (262) | Retrospective cohort | 20/12/2020 to 25/2/2021 Israel.  | 6,710   | Symptomatic Infection                           | 7-21 days: 89% (83-94%)        | ≥7 days: 97% (94-99%)                      |                                                            |                                      |                                       |                                       |
|  |       |                      |                                  |         |                                                 |                                | ≥21 days: 98% (94-100%)                    |                                                            |                                      |                                       |                                       |
|  |       |                      |                                  |         | Asymptomatic Infection                          | 7-21 days: 36% (-51-69%)       | ≥7 days: 86% (69-93%)                      |                                                            |                                      |                                       |                                       |
|  |       |                      |                                  |         |                                                 |                                | ≥21 days: 94% (78-98%)                     |                                                            |                                      |                                       |                                       |
|  | (263) | Cohort               | 27/12/2020 to 28/2/2021 Sweden.  | 805,741 | Infection                                       | ≥14 days: 42% (14-63%)         | <7 days: 60% (27-81%)                      |                                                            |                                      |                                       |                                       |
|  |       |                      |                                  |         |                                                 |                                | ≥7 days: 86% (72-94%)                      |                                                            |                                      |                                       |                                       |
|  | (264) | Prospective cohort   | 27/12/2020 to 26/5/2021 Spain.   | 28,594  | Infection – Nursing home residents              | 12 days: 20% (19.76-20.3%)     | 90.89% (90.84-90.95%)                      |                                                            |                                      |                                       |                                       |
|  |       |                      |                                  |         |                                                 |                                |                                            | 40.28% (40.17-40.39)                                       |                                      |                                       |                                       |
|  |       |                      |                                  |         |                                                 | 26,238                         | Infection – Nursing home staff             | 12 days: 20.27% (19.8-20.73%)                              | 85.02% (84.86-85.17%)                |                                       |                                       |
|  |       |                      |                                  |         |                                                 |                                |                                            | 26.49% (26.25-26.74%)                                      |                                      |                                       |                                       |
|  |       |                      |                                  |         |                                                 | 61,951                         | Infection – Healthcare workers             | 12 days: 15.44% (15.19-15.68%)                             | 94% (93.92-94.1%)                    |                                       |                                       |
|  |       |                      |                                  |         |                                                 |                                |                                            | 33.8% (33.66-33.92%)                                       |                                      |                                       |                                       |
|  |       |                      |                                  | 28,594  | Hospital admission - Nursing home residents     | 12 days: 67.59% (65.29-69.75%) | 95.06% (94.73-95.38%)                      |                                                            |                                      |                                       |                                       |
|  |       |                      |                                  |         |                                                 | 46.24% (45.62-46.86%)          |                                            |                                                            |                                      |                                       |                                       |
|  |       |                      |                                  |         | Death - Nursing home residents                  | 12 days: 43.95% (37.87-49.44%) | 96.73% (96.43-96.99)                       |                                                            |                                      |                                       |                                       |
|  |       |                      |                                  |         |                                                 | 51.71% (51.17-52.23%)          |                                            |                                                            |                                      |                                       |                                       |
|  | (265) | Cohort               | 27/12/2020 to 11/4/2021 Denmark. | 864,096 | Infection - Prioritised risk groups             | 0-14 days: -72% (-80- -64%)    | 0-7 days: 42% (33-50%)                     |                                                            |                                      |                                       |                                       |
|  |       |                      |                                  |         |                                                 |                                |                                            |                                                            | >14 days to second dose: 7% (-1-15%) | > 7 days: 82% (79-84%)                |                                       |
|  |       |                      |                                  |         |                                                 |                                |                                            | COVID-19-related hospitalisation - Prioritised risk groups | 0-14 days: 54% (44-62%)              | 0-7 days: 90% (80-95%)                |                                       |
|  |       |                      |                                  |         |                                                 |                                |                                            |                                                            |                                      | >14 days to second dose: 35% (18-49%) | >7 days: 93% (89-96%)                 |
|  |       |                      |                                  |         |                                                 |                                |                                            | COVID-19-related death - Prioritised risk groups           | 0-14 days: 76% (68-82%)              | >7 days: 94% (90-96%)                 |                                       |
|  |       |                      |                                  |         |                                                 |                                |                                            |                                                            |                                      |                                       | >14 to second dose days: 7% (-15-25%) |
|  | (266) | Case-control         | 27.1.2021 to 7/2/2021 Spain.     | 268     | Infection                                       | 52.6% (95%CI: 1.1-77.3)        |                                            |                                                            |                                      |                                       |                                       |
|  | (267) | Observational        | 15/12/2020 to 3/2/2021 England.  | 170,226 | Infection                                       | 21-27 days: 55.2% (40.8-66.8%) |                                            |                                                            |                                      |                                       |                                       |
|  |       |                      |                                  |         |                                                 |                                |                                            | Emergency hospital attendance                              | 21-27 days: 57.8% (30.8-74.5%)       |                                       |                                       |
|  |       |                      |                                  |         |                                                 |                                |                                            | Hospitalisation                                            | 21-27 days: 50.1% (19.9-69.5%)       |                                       |                                       |
|  | (268) | Cohort               | 27/12/2020 to 10/3/2021 Spain.   | 299,209 | Infection (without evidence of prior infection) | 0-14 days: 28.9% (26.9-31%)    |                                            |                                                            |                                      |                                       |                                       |
|  |       |                      |                                  |         |                                                 |                                |                                            |                                                            |                                      | 15-21 days: 51.9% (50.7-53.1%)        |                                       |
|  |       |                      |                                  |         |                                                 |                                |                                            |                                                            |                                      | 22-28 days: 62.9% (61.9-64%)          |                                       |
|  |       |                      |                                  |         |                                                 |                                |                                            |                                                            |                                      | ≥29 days: 81.8% (81.0-82.7%)          |                                       |
|  |       |                      |                                  |         |                                                 |                                |                                            |                                                            |                                      | 0-14 days: 9.6% (-6.9-26.8%)          |                                       |

|  |       |                                   |                                      |                                             |                                                                                              |                                                               |                                |
|--|-------|-----------------------------------|--------------------------------------|---------------------------------------------|----------------------------------------------------------------------------------------------|---------------------------------------------------------------|--------------------------------|
|  |       |                                   |                                      |                                             | Infection (with evidence of prior infection)                                                 | 15-21 days: 25.5% (15.1-36.6%)                                |                                |
|  |       |                                   |                                      |                                             |                                                                                              | 22-28 days: 34.6% (25.7-44.1%)                                |                                |
|  |       |                                   |                                      |                                             |                                                                                              | ≥29 days: 56.8% (47.1-67.7%)                                  |                                |
|  | (269) | Observational                     | 1/12/2020 to 8/5/2021 UK.            | 383,812                                     | Infection                                                                                    | 8-20 days after either dose: 56% (51-61%)                     |                                |
|  |       |                                   |                                      |                                             |                                                                                              | ≥21 days: 64% (59-68%)                                        | ≥21 days: 80% (74-84%)         |
|  |       |                                   |                                      |                                             | [NOTE: Both BNT162b2 and AZD1222 vaccines were included in this study]                       |                                                               |                                |
|  | (270) | Cohort                            | 19/12/2020 to 14/3/2021 Israel.      | 9,347                                       | Infection                                                                                    | 4-10 days: 28% (-18-57%)                                      | ≥11 days: 65% (45-79%)         |
|  |       |                                   |                                      |                                             |                                                                                              | ≥11 days after first, ≤10 days after second: 55% (32-70%)     |                                |
|  |       |                                   |                                      |                                             | Symptomatic infection                                                                        | 4-10 days: 21% (-32-41%)                                      | ≥11 days: 90% (84-94%)         |
|  |       |                                   |                                      |                                             |                                                                                              | ≥11 days after first, ≤10 days after second: 80% (69-87%)     |                                |
|  | (271) | Prospective cohort                | 8/12/2020 to 15/3/2021 England.      | 10,412                                      | Infection                                                                                    | 0-6 days: 36% (-6-62%)                                        |                                |
|  |       |                                   |                                      |                                             |                                                                                              | 7-13 days: 17% (-28-46%)                                      |                                |
|  |       |                                   |                                      |                                             |                                                                                              | 14-20 days: 4% (-60-43%)                                      |                                |
|  |       |                                   |                                      |                                             |                                                                                              | 21-27 days: 8% (-59-47%)                                      |                                |
|  |       |                                   |                                      |                                             |                                                                                              | 28-34 days: 56% (19-76%)                                      |                                |
|  |       |                                   |                                      |                                             |                                                                                              | 35-48 days: 62% (23-81%)                                      |                                |
|  |       |                                   |                                      |                                             |                                                                                              | ≥49 days: 51% (-17-80%)                                       |                                |
|  |       |                                   |                                      |                                             | [NOTE: Both BNT162b2 and AZD1222 vaccines were included in this study]                       |                                                               |                                |
|  | (272) | Retrospective cohort              | 1/1/2021 to 31/3/2021 US.            | 44,498                                      | Infection                                                                                    | >14 days after first, ≤14 days after second: 78.1% (71.1-82%) |                                |
|  |       |                                   |                                      |                                             |                                                                                              |                                                               | >14 days: 96.8% (95.3-97.8%)   |
|  | (273) | Prospective cohort                | 14/12/2020 to 10/4/2021 US.          | 3,975                                       | Infection                                                                                    | ≥14 days after first, <14 days after second: 80% (60-90%)     |                                |
|  |       |                                   |                                      |                                             |                                                                                              |                                                               | ≥14 days: 93% (78-98%)         |
|  | (274) | Randomised controlled trial       | 15/10/2020 to 12/1/2021 US.          | 2,260                                       | Infection - Adolescents (12-15 years of age) - (without evidence of prior infection)         |                                                               | ≥7 days: 100% (75.3-100%)      |
|  |       |                                   |                                      |                                             | Infection - Adolescents (12-15 years of age) - (with or without evidence of prior infection) |                                                               | ≥7 days: 100% (78.1-100%)      |
|  | (275) | Retrospective cohort              | 19/7/2021 to 13/11/2021 South Korea. | 444,313                                     | Infection – Adolescents (16-18 years of age)                                                 | ≥14 days: 91.1% (89.6-92.5%)                                  | ≥14 days: 99.1% (98.5-99.5%)   |
|  | (276) | Prospective cohort                | 25/7/2021 to 4/12/2021 US.           | 243                                         | Infection - Adolescents (12-17 years of age)                                                 |                                                               | ≥14 days: 92% (79-97%)         |
|  | (277) | Retrospective longitudinal cohort | 21/12/2020 to 6/2/2021 Israel.       | 5,439,734 first dose, 5,112,516 second dose | Infection                                                                                    | 14-20 days: 54.3% (50.6-57.8%)                                | 8-14 days: 89.9% (88.6-91.1%)  |
|  |       |                                   |                                      |                                             | Symptomatic infection                                                                        | 14-20 days: 58.3% (54.7-61.6%)                                | 8-14 days: 93.6% (92.7-94.3%)  |
|  |       |                                   |                                      |                                             | Hospitalisation                                                                              | 14-20 days: 74.5% (69.1-79%)                                  | 8-14 days: 93.8% (91.9-95.2%)  |
|  |       |                                   |                                      |                                             | Severe/Critical disease                                                                      | 14-20 days: 77.3% (71.2-82.1%)                                | 8-14 days: 94.4% (92.6-95.8%)  |
|  |       |                                   |                                      |                                             | Death                                                                                        | 14-20 days: 71.7% (64.1-77.7%)                                | 8-14 days: 91.3% (87.4-94.0%)  |
|  |       |                                   |                                      |                                             | Infection                                                                                    |                                                               | 15-21 days: 96.8% (96.1-97.4%) |

|  |       |                            |                                                                                                                 |           |                                                                                                  |                              |                                |
|--|-------|----------------------------|-----------------------------------------------------------------------------------------------------------------|-----------|--------------------------------------------------------------------------------------------------|------------------------------|--------------------------------|
|  |       |                            |                                                                                                                 |           | Symptomatic infection                                                                            |                              | 15-21 days: 98.1% (97.7-98.5%) |
|  |       |                            |                                                                                                                 |           | Hospitalisation                                                                                  |                              | 15-21 days: 98% (97.1-98.6%)   |
|  |       |                            |                                                                                                                 |           | Severe/Critical disease                                                                          |                              | 15-21 days: 98.6% (97.8-99.1%) |
|  |       |                            |                                                                                                                 |           | Death                                                                                            |                              | 15-21 days: 97.7% (95.9-98.7%) |
|  |       |                            |                                                                                                                 |           | Infection                                                                                        |                              | 22-28 days: 97.3% (96.7-97.8%) |
|  |       |                            |                                                                                                                 |           | Symptomatic infection                                                                            |                              | 22-28 days: 97.9% (97.4-98.3%) |
|  |       |                            |                                                                                                                 |           | Hospitalisation                                                                                  |                              | 22-28 days: 99% (98.4-99.3%)   |
|  |       |                            |                                                                                                                 |           | Severe/Critical disease                                                                          |                              | 22-28 days: 99.2% (98.6-99.5%) |
|  |       |                            |                                                                                                                 |           | Death                                                                                            |                              | 22-28 days: 98.6% (97-99.3%)   |
|  | (278) | Test-negative case-control | January to March 2021 US.                                                                                       | 1,843     | Infection                                                                                        | ≥14 days: 81.7% (74.3-86.9%) | ≤2 days: 81.7% (74.3-86.9%)    |
|  |       |                            |                                                                                                                 |           |                                                                                                  |                              | 3-6 days: 81.7% (74.3-86.9%)   |
|  |       |                            |                                                                                                                 |           |                                                                                                  |                              | ≥7 days: 93.5% (86.5-96.9%)    |
|  |       |                            |                                                                                                                 |           | [NOTE: 76% of case-patients and 78% of controls received BNT162b2, remainder received mRNA-1273] |                              |                                |
|  | (279) | Prospective cohort         | January to April 2021 Spain.                                                                                    | 20,961    | Infection                                                                                        | 21% (3-36%)                  | 65% (56-73%)                   |
|  |       |                            |                                                                                                                 |           | Symptomatic infection                                                                            | 30% (10-45%)                 | 82% (73-88%)                   |
|  |       |                            |                                                                                                                 |           | Symptomatic infection – 18-59 years old                                                          | 50% (12-72%)                 | 85% (74-91%)                   |
|  |       |                            |                                                                                                                 |           | Symptomatic infection - ≥60 years old                                                            | 20% (-7-40%)                 | 76% (55-87%)                   |
|  |       |                            |                                                                                                                 |           | Hospitalisation                                                                                  | 65% (25-83%)                 | 94% (60-99%)                   |
|  | (280) | Prospective cohort         | 8/10/2020 to 22/2/2021 Scotland.                                                                                | 409,588   | Hospitalisation                                                                                  | 0-6 days: 86% (81-90%)       |                                |
|  |       |                            |                                                                                                                 |           |                                                                                                  | 7-13 days: 53% (45-59%)      |                                |
|  |       |                            |                                                                                                                 |           |                                                                                                  | 14-20 days: 69% (62-75%)     |                                |
|  |       |                            |                                                                                                                 |           |                                                                                                  | 21-27 days: 78% (71-83%)     |                                |
|  |       |                            |                                                                                                                 |           |                                                                                                  | 28-34 days: 91% (85-94%)     |                                |
|  |       |                            |                                                                                                                 |           |                                                                                                  | 35-41 days: 78% (69-85%)     |                                |
|  |       |                            |                                                                                                                 |           |                                                                                                  | ≥42 days: 77% (68-83%)       |                                |
|  | (281) | Test-negative case-control | 27/12/2020 to 30/6/2021 Belgium, Croatia, Czechia, France, Greece, Ireland, Luxembourg, Malta, Portugal, Spain. | 1,893     | Infection                                                                                        | ≥14 days: 76% (61-86%)       | ≥14 days: 94% (88-97%)         |
|  | (282) | Prospective cohort         | 1/5/2021 to 3/9/2021 US.                                                                                        | 8,690,825 | Infection - 18-49 years old                                                                      |                              | ≥14 days: 93.3% (92.2-94.4%)   |
|  |       |                            |                                                                                                                 |           | Infection - 50-64 years old                                                                      |                              | ≥14 days: 95.0% (94.0-96.0%)   |
|  |       |                            |                                                                                                                 |           | Infection - ≤65 years old                                                                        |                              | ≥14 days: 91.4% (90.0-92.8%)   |
|  |       |                            |                                                                                                                 |           | Hospitalisation - 18-49 years old                                                                |                              | ≥14 days: 96.1% (94.1-97.6%)   |
|  |       |                            |                                                                                                                 |           | Hospitalisation - 50-64 years old                                                                |                              | ≥14 days: 95.6% (94.2-96.7%)   |
|  |       |                            |                                                                                                                 |           | Hospitalisation - ≤65 years old                                                                  |                              | ≥14 days: 94.8% (94.0-95.5%)   |
|  | (283) |                            |                                                                                                                 | 1,222     | Hospitalisation 12-18 years old                                                                  | 97% (86-100%)                | ≥14 days: 94% (90-96%)         |

|                                                                                                      |                                                                                                       |                             |                             |                                      |                                        |                                                              |                    |                          |
|------------------------------------------------------------------------------------------------------|-------------------------------------------------------------------------------------------------------|-----------------------------|-----------------------------|--------------------------------------|----------------------------------------|--------------------------------------------------------------|--------------------|--------------------------|
|                                                                                                      |                                                                                                       |                             | Test-negative case-control  | 1/7/2021 to 25/10/2021 US.           |                                        | ICU admission – 12-18 years old                              |                    | ≥14 days: 98% (93-99%)   |
|                                                                                                      |                                                                                                       |                             |                             |                                      |                                        | Life support – 12-18 years old                               |                    | ≥14 days: 98% (92-100%)  |
|                                                                                                      |                                                                                                       | (284)                       | Test-negative case-control  | 1/7/2021 to 9/12/2021 US.            | 283                                    | COVID-19 multisystem inflammatory syndrome – 12-18 years old |                    | ≥14 days: 92% (77-97%)   |
|                                                                                                      |                                                                                                       |                             |                             |                                      |                                        |                                                              |                    |                          |
| <b>Oxford University/ AstraZeneca (AZD1222)</b> - Non-replicating adenovirus viral vector (ChAdOx1). | Two doses (0.5ml each) intramuscularly (deltoid) with a recommended interval window of 8 to 12 weeks. | (242)                       | Test-negative case-control  | 26/10/2020 to 16/5/2021 UK.          | 19,109                                 | Infection - Alpha                                            | 48.7% (45.2–51.9%) | 74.5% (68.4–79.4%)       |
|                                                                                                      |                                                                                                       |                             |                             |                                      |                                        | Infection - Delta                                            | 30.0% (24.3–35.3%) | 67.0% (61.3–71.8%)       |
|                                                                                                      |                                                                                                       | (245)                       | Test-negative case-control  | 14/12/2020 to 3/8/2021 Canada.       | 682,071                                | Symptomatic infection - Alpha                                | 64% (60-68%)       |                          |
|                                                                                                      |                                                                                                       |                             |                             |                                      |                                        | Symptomatic infection – Beta or Gamma                        | 48% (28-63%)       |                          |
|                                                                                                      |                                                                                                       |                             |                             |                                      |                                        | Symptomatic infection - Delta                                | 67% (44-80%)       |                          |
|                                                                                                      |                                                                                                       |                             |                             |                                      |                                        | Hospitalisation or death - Alpha                             | 85% (81-88%)       |                          |
|                                                                                                      |                                                                                                       |                             |                             |                                      |                                        | Hospitalisation or death – Bet or Gamma                      | 83% (66-92%)       |                          |
|                                                                                                      |                                                                                                       |                             |                             |                                      |                                        | Hospitalisation or death - Delta                             | 88% (60-96%)       |                          |
|                                                                                                      |                                                                                                       | (133)                       | Test-negative observational | 1/4/2021 to 6/6/2021 Scotland.       | 462,755                                | Infection with Alpha variant                                 |                    | 73% (66-78%)             |
|                                                                                                      |                                                                                                       |                             |                             |                                      |                                        | Infection with Delta variant                                 |                    | 60% (53-66%)             |
|                                                                                                      |                                                                                                       | (285)                       | Randomised controlled trial | 1/10/2020 to 14/1/2021 UK.           | 8,534                                  | Symptomatic infection – Alpha                                |                    | 70.4% (43.6-84%%)        |
|                                                                                                      |                                                                                                       |                             |                             |                                      |                                        | Symptomatic infection – non-Alpha                            |                    | 81.5% (67.9-89.4%)       |
|                                                                                                      |                                                                                                       | (286)                       | Randomised controlled trial | 28/8/2020 to 5/3/2021 US.            | 32,449                                 | Symptomatic infection                                        |                    | 79%                      |
|                                                                                                      |                                                                                                       |                             |                             |                                      |                                        | Severe disease or hospitalisation                            |                    | 100%                     |
|                                                                                                      |                                                                                                       | (247)                       | Test-negative case-control  | 12/4/2021 to 4/6/2021 England.       | 14,019                                 | Hospitalisation – Alpha                                      | 76% (61-85%)       | 86% (53-96%)             |
|                                                                                                      |                                                                                                       |                             |                             |                                      |                                        | Hospitalisation – Delta                                      | 71% (51-83%)       | 92% (75-97%)             |
|                                                                                                      |                                                                                                       | (287)                       | Randomised controlled trial | 23/4/2020 to 4/11/2020 UK, Brazil.   | 11,636                                 | Infection                                                    |                    | 62.1% (41.0-75.7%)       |
|                                                                                                      |                                                                                                       | (288)                       | Randomised controlled trial | 24/6/2020 to 9/11/2020 South Africa. | 2,026                                  | Symptomatic infection                                        |                    | 21.9% (-49.9-59.8%)      |
|                                                                                                      |                                                                                                       |                             |                             |                                      |                                        | Symptomatic infection - Beta                                 |                    | 10.4% (-76.8-54.8%)      |
|                                                                                                      |                                                                                                       | (248)                       | Test-negative case-control  | 8/12/2020 to 19/2/2021. England.     | 156,930                                | Symptomatic infection                                        |                    | 28-34 days: 60% (41-73%) |
|                                                                                                      |                                                                                                       |                             |                             |                                      |                                        | ≥35 days: 73% (27-90%)                                       |                    |                          |
| (258)                                                                                                | Observational                                                                                         | 1/12/2020 to 1/8/2021 UK.   | 384,543                     | Infection - Alpha                    | ≥21 days: 63% (55–69%)                 | 0-13 days: 72% (50-84%)                                      |                    |                          |
|                                                                                                      |                                                                                                       |                             |                             |                                      |                                        | ≥14 days: 79% (56–90%)                                       |                    |                          |
|                                                                                                      |                                                                                                       |                             |                             | Infection Delta                      | ≥21 days: 46% (35–55%)                 | 0-13 days: 71% (64–77%)                                      |                    |                          |
|                                                                                                      |                                                                                                       |                             |                             |                                      |                                        | ≥14 days: 67% (62–71%)                                       |                    |                          |
| (289)                                                                                                | Test-negative case-control                                                                            | 1/3/2021 to 31/5/2021 India | 720                         | Infection                            | 49% (17-68%)                           | 54% (27-71%)                                                 |                    |                          |
|                                                                                                      |                                                                                                       |                             |                             | Symptomatic infection                | 58% (28-75%)                           | 64% (38-78%)                                                 |                    |                          |
|                                                                                                      |                                                                                                       |                             |                             | Moderately severe disease            | Any dosage >3 weeks ago: 95% (44-100%) |                                                              |                    |                          |

|                                                                                                                                                                                                                                                                         |  |                                                                        |                               |                                                  |              |                                                                           |                                           |                                 |  |
|-------------------------------------------------------------------------------------------------------------------------------------------------------------------------------------------------------------------------------------------------------------------------|--|------------------------------------------------------------------------|-------------------------------|--------------------------------------------------|--------------|---------------------------------------------------------------------------|-------------------------------------------|---------------------------------|--|
| 1<br>2<br>3<br>4<br>5<br>6<br>7<br>8<br>9<br>10<br>11<br>12<br>13<br>14<br>15<br>16<br>17<br>18<br>19<br>20<br>21<br>22<br>23<br>24<br>25<br>26<br>27<br>28<br>29<br>30<br>31<br>32<br>33<br>34<br>35<br>36<br>37<br>38<br>39<br>40<br>41<br>42<br>43<br>44<br>45<br>46 |  | (269)                                                                  | Observational                 | 1/12/2020 to 8/5/2021 UK.                        | 383,812      | Infection                                                                 | 8-20 days after either dose: 56% (51-61%) |                                 |  |
|                                                                                                                                                                                                                                                                         |  |                                                                        |                               |                                                  |              |                                                                           | ≥21 days: 64% (59-68%)                    | ≥21 days: 80% (74-84%)          |  |
|                                                                                                                                                                                                                                                                         |  | [NOTE: Both BNT162b2 and AZD1222 vaccines were included in this study] |                               |                                                  |              |                                                                           |                                           |                                 |  |
|                                                                                                                                                                                                                                                                         |  | (290)                                                                  | Randomised controlled trial   | 28/8/2020 to 15/1/2021 US, Chile, Peru.          | 32,451       | Symptomatic infection                                                     |                                           | ≥15 days: 74.0% (65.3-80.5%)    |  |
|                                                                                                                                                                                                                                                                         |  |                                                                        |                               |                                                  |              | Severe or critical infection                                              |                                           | ≥15 days: 100.0% (71.6-NE%)     |  |
|                                                                                                                                                                                                                                                                         |  |                                                                        |                               |                                                  |              | Emergency department visit                                                |                                           | ≥15 days: 94.8% (59.0-99.3%)    |  |
|                                                                                                                                                                                                                                                                         |  |                                                                        |                               |                                                  |              | Hospitalisation                                                           |                                           | ≥15 days: 94.2% (53.3-99.3%)    |  |
|                                                                                                                                                                                                                                                                         |  |                                                                        |                               |                                                  |              | ICU admission                                                             |                                           | ≥15 days: 100.0 (-1781.6-NE%)   |  |
|                                                                                                                                                                                                                                                                         |  | (291)                                                                  | Clinical trial                | 23/6/2020 to 1/12/2020 Brazil.                   | 9433         | Infection – B.1.1.33                                                      |                                           | 88.2 (5.4, 98.5)                |  |
|                                                                                                                                                                                                                                                                         |  |                                                                        |                               |                                                  |              | Infection – B.1.1.28                                                      |                                           | 72.6% (46.4-86.0%)              |  |
|                                                                                                                                                                                                                                                                         |  |                                                                        |                               |                                                  |              | Infection – Zeta                                                          |                                           | 68.7% (54.9-78.3%)              |  |
|                                                                                                                                                                                                                                                                         |  |                                                                        |                               |                                                  |              | Infection – Gamma                                                         |                                           | 63.6% (-2.1-87.0%)              |  |
|                                                                                                                                                                                                                                                                         |  |                                                                        |                               |                                                  |              | Infection – Undetermined variant                                          |                                           | 56.6% (28.2-73.8%)              |  |
|                                                                                                                                                                                                                                                                         |  |                                                                        |                               |                                                  |              | Hospitalisation – Any variant                                             |                                           | 95% (61-99%)                    |  |
|                                                                                                                                                                                                                                                                         |  | (292)                                                                  | Meta-analysis                 | 23/4/2020 to 6/12/2020 UK, Brazil, South Africa. | 17,178       | Asymptomatic infection                                                    |                                           | ≥14 days: 22.2% (-9.9-45%)      |  |
|                                                                                                                                                                                                                                                                         |  |                                                                        |                               |                                                  |              | Symptomatic infection                                                     |                                           | ≥14 days: 66.7% (57.4-74%)      |  |
|                                                                                                                                                                                                                                                                         |  |                                                                        |                               |                                                  |              | Asymptomatic infection - <6 weeks prime-boost interval (standard doses)   |                                           | ≥14 days: -11.8% (-189.5-56.8%) |  |
|                                                                                                                                                                                                                                                                         |  |                                                                        |                               |                                                  |              | Asymptomatic infection - 6-8 weeks prime-boost interval (standard doses)  |                                           | ≥14 days: -74.2% (-330.3-29.5%) |  |
|                                                                                                                                                                                                                                                                         |  |                                                                        |                               |                                                  |              | Asymptomatic infection – 9-11 weeks prime-boost interval (standard doses) |                                           | ≥14 days: 39.9% (-62.3-77.8%)   |  |
|                                                                                                                                                                                                                                                                         |  |                                                                        |                               |                                                  |              | Asymptomatic infection - ≥12 weeks prime-boost interval (standard doses)  |                                           | ≥14 days: 22.8% (-63.3-63.5%)   |  |
|                                                                                                                                                                                                                                                                         |  |                                                                        |                               |                                                  |              | Symptomatic infection - <6 weeks prime-boost interval (standard doses)    |                                           | ≥14 days: 55.1% (33-69.9%)      |  |
|                                                                                                                                                                                                                                                                         |  |                                                                        |                               |                                                  |              | Symptomatic infection - 6-8 weeks prime-boost interval (standard doses)   |                                           | ≥14 days: 59.9% (32-76.4%)      |  |
|                                                                                                                                                                                                                                                                         |  |                                                                        |                               |                                                  |              | Symptomatic infection – 9-11 weeks prime-boost interval (standard doses)  |                                           | ≥14 days: 63.7% (28-81.7%)      |  |
|                                                                                                                                                                                                                                                                         |  |                                                                        |                               |                                                  |              | Symptomatic infection - ≥12 weeks prime-boost interval (standard doses)   |                                           | ≥14 days: 81.3% (60.3-91.2%)    |  |
|                                                                                                                                                                                                                                                                         |  | (293)                                                                  | Cross-sectional observational | 1/5/2021 to 31/5/2021 India.                     | 583          | Infection                                                                 | <14 days: 15% (-68-57%)                   | <14 days: 66% (34-81%)          |  |
|                                                                                                                                                                                                                                                                         |  |                                                                        |                               |                                                  |              |                                                                           | ≥14 days: 44% (7-66%)                     | ≥14 days: 83% (73-89%)          |  |
|                                                                                                                                                                                                                                                                         |  |                                                                        |                               |                                                  |              | Hospitalisation                                                           | <14 days: 43% (-68-81%)                   | <14 days: 83% (17-96%)          |  |
|                                                                                                                                                                                                                                                                         |  |                                                                        |                               |                                                  |              |                                                                           | ≥14 days: 76% (21-92%)                    | ≥14 days: 88% (55-97%)          |  |
|                                                                                                                                                                                                                                                                         |  |                                                                        |                               |                                                  |              | ICU admission or death                                                    | <14 days: 62% (-27-89%)                   | <14 days: 93% (35-99%)          |  |
|                                                                                                                                                                                                                                                                         |  |                                                                        |                               |                                                  |              |                                                                           | ≥14 days: 53% (9-29-83%)                  | ≥14 days: 93% (64-99%)          |  |
|                                                                                                                                                                                                                                                                         |  | [NOTE: Participants either received Covaxin or Covishield (AZD1222)]   |                               |                                                  |              |                                                                           |                                           |                                 |  |
|                                                                                                                                                                                                                                                                         |  | (279)                                                                  | Prospective cohort            | January to April 2021 Spain.                     | 20,961       | Infection                                                                 | 44% (31-54%)                              |                                 |  |
|                                                                                                                                                                                                                                                                         |  |                                                                        |                               |                                                  |              | Symptomatic infection                                                     | 50% (37-61%)                              |                                 |  |
|                                                                                                                                                                                                                                                                         |  |                                                                        |                               | Symptomatic infection – 18-59 years old          | 50% (34-62%) |                                                                           |                                           |                                 |  |

|  |                                                                                                                           |       |                             |                                                                                            |                                |                                                                                      |                                 |                               |                                 |  |
|--|---------------------------------------------------------------------------------------------------------------------------|-------|-----------------------------|--------------------------------------------------------------------------------------------|--------------------------------|--------------------------------------------------------------------------------------|---------------------------------|-------------------------------|---------------------------------|--|
|  |                                                                                                                           |       |                             |                                                                                            |                                | Symptomatic infection - ≥60 years old                                                | 53% (19-72%)                    |                               |                                 |  |
|  |                                                                                                                           |       |                             |                                                                                            |                                | Hospitalisation                                                                      | 92% (46-99%)                    |                               |                                 |  |
|  |                                                                                                                           | (294) | Retrospective cohort        | 1/6/2020 to 31/5/2021 India.                                                               | 11,405                         | Infection (with evidence of prior infection)                                         |                                 | ≥14 days: 91.1% (84.1-94.9%)  |                                 |  |
|  |                                                                                                                           |       |                             |                                                                                            |                                | Infection (without evidence of prior infection)                                      |                                 | ≥14 days: 31.8% (23.5-39.1%)  |                                 |  |
|  |                                                                                                                           |       |                             |                                                                                            |                                | [NOTE: 5.77% of participants received Covaxin, 94.23% received Covishield (AZD1222)] |                                 |                               |                                 |  |
|  |                                                                                                                           | (280) | Prospective cohort          | 8/10/2020 to 22/2/2021 Scotland                                                            | 409,588                        | Hospitalisation                                                                      | 0-6 days: 72% (66-77%)          |                               |                                 |  |
|  |                                                                                                                           |       |                             |                                                                                            |                                |                                                                                      | 7-13 days: 68% (61-73%)         |                               |                                 |  |
|  |                                                                                                                           |       |                             |                                                                                            |                                |                                                                                      | 14-20 days: 73% (66-79%)        |                               |                                 |  |
|  |                                                                                                                           |       |                             |                                                                                            |                                |                                                                                      | 21-27 days: 81% (72-87%)        |                               |                                 |  |
|  |                                                                                                                           |       |                             |                                                                                            |                                |                                                                                      | 28-34 days: 88% (75-94%)        |                               |                                 |  |
|  |                                                                                                                           |       |                             |                                                                                            |                                |                                                                                      | 35-41 days: 97% (63-100%)       |                               |                                 |  |
|  |                                                                                                                           |       |                             |                                                                                            |                                | ≥42 days: 59% (-296-96%)                                                             |                                 |                               |                                 |  |
|  |                                                                                                                           | (295) | Cohort                      | 17/1/2021 to 11/5/2021 Brazil.                                                             | 313,328                        | Death                                                                                | ≥21 days: 94.4% (93.9-94.8%)    | ≥21 days: 99.8 (99.6-99.9%)   |                                 |  |
|  |                                                                                                                           |       |                             |                                                                                            |                                | Death – 75-79 years old                                                              | ≥21 days: 88% (85.8-90%)        |                               |                                 |  |
|  |                                                                                                                           |       |                             |                                                                                            |                                | Death – 80-89 years old                                                              | ≥21 days: 96.8% (96.5-97.2%)    |                               |                                 |  |
|  |                                                                                                                           |       |                             |                                                                                            |                                | Death - ≥90 years old                                                                | ≥21 days: 99.2% (99.1-99.4%)    |                               |                                 |  |
|  |                                                                                                                           | (296) | Retrospective cohort        | 18/1/2021 to 30/6/2021 Brazil.                                                             | 60,577, 870                    | Infection                                                                            | ≥14 days: 34% (33.2-34.7%)      | 0-13 days: 56.9% (55.3-58.5%) |                                 |  |
|  |                                                                                                                           |       |                             |                                                                                            |                                |                                                                                      |                                 | ≥14 days: 70% (68.6-71.3%)    |                                 |  |
|  |                                                                                                                           |       |                             |                                                                                            |                                | Hospitalisation                                                                      | ≥14 days: 52.2% (50.9-53.4%)    | 0-13 days: 69.6% (67.2-71.8%) |                                 |  |
|  |                                                                                                                           |       |                             |                                                                                            |                                |                                                                                      |                                 | ≥14 days: 86.8% (85.2-88.2%)  |                                 |  |
|  |                                                                                                                           |       |                             |                                                                                            |                                | ICU admission                                                                        | ≥14 days: 54% (51.8-56%)        | 0-13 days: 69.2% (65-72.8%)   |                                 |  |
|  |                                                                                                                           |       |                             |                                                                                            |                                |                                                                                      |                                 | ≥14 days: 88.1% (85.4-90.3%)  |                                 |  |
|  |                                                                                                                           |       |                             |                                                                                            |                                | Death                                                                                | ≥14 days: 49.3% (47-51.5%)      | 0-13 days: 72.1% (69.1-74.9%) |                                 |  |
|  |                                                                                                                           |       |                             |                                                                                            |                                |                                                                                      |                                 | ≥14 days: 90.2% (88.3-91.8%)  |                                 |  |
|  |                                                                                                                           |       |                             |                                                                                            |                                |                                                                                      |                                 |                               |                                 |  |
|  | <b>Johnson &amp; Johnson (Ad26.COVS.2.S)</b> - Recombinant, replication-incompetent adenovirus serotype 26 (Ad26) vector. | (172) | Randomised controlled trial | 21/9/2020 to 22/1/2021 Argentina, Brazil, Chile, Colombia, Mexico, Peru, South Africa, US. | 39,321                         | Moderate to severe-critical infection                                                | ≥14 days: 66.9% (59.0-73.4%)    |                               |                                 |  |
|  |                                                                                                                           |       |                             |                                                                                            |                                |                                                                                      | ≥28 days: 66.1% (55.0-74.8%)    |                               |                                 |  |
|  |                                                                                                                           |       |                             |                                                                                            |                                |                                                                                      | Severe-critical infection       | ≥14 days: 76.7% (54.6-89.1%)  |                                 |  |
|  |                                                                                                                           |       |                             |                                                                                            |                                |                                                                                      |                                 | ≥28 days: 85.4% (54.2-96.9%)  |                                 |  |
|  |                                                                                                                           |       | (297)                       | Test-negative case-control                                                                 | 25/6/2021 to 30/9/2021 Brazil. | 11,817                                                                               | Symptomatic infection           | 14-27 days: 27.4% (8.7-42.7%) |                                 |  |
|  |                                                                                                                           |       |                             |                                                                                            |                                |                                                                                      |                                 | ≥28 days: 50.9% (35.5-63.0%)  |                                 |  |
|  |                                                                                                                           |       |                             |                                                                                            |                                |                                                                                      |                                 | Hospitalisation               | 14-27 days: 33.5% (-29.1-69.8%) |  |
|  |                                                                                                                           |       |                             |                                                                                            |                                |                                                                                      |                                 |                               | ≥28 days: 72.9% (35.1-91.1%)    |  |
|  |                                                                                                                           |       |                             |                                                                                            |                                | Admission to an ICU                                                                  | 14-27 days: 56.0% (-52.8-93.1%) |                               |                                 |  |
|  |                                                                                                                           |       |                             |                                                                                            |                                |                                                                                      | ≥28 days: 92.5% (54.9-99.6%)    |                               |                                 |  |
|  |                                                                                                                           |       |                             |                                                                                            |                                |                                                                                      | 14-27 days: 65.2% (-74.7-98.1%) |                               |                                 |  |



|  |                                                                                                               |       |                            |                                |                                  |                                                                                                           |                                 |                              |
|--|---------------------------------------------------------------------------------------------------------------|-------|----------------------------|--------------------------------|----------------------------------|-----------------------------------------------------------------------------------------------------------|---------------------------------|------------------------------|
|  |                                                                                                               |       |                            |                                |                                  | Mechanical ventilation                                                                                    | ≥28 days: 88.7% (17.9-99.5%)    |                              |
|  |                                                                                                               |       |                            |                                |                                  | Death                                                                                                     | 14-27 days: 48.9% (-92.3-92.5%) |                              |
|  |                                                                                                               | (298) | Retrospective case-control | 27/2/2021 to 14/4/2021 US.     | 126,572                          | Symptomatic infection                                                                                     | ≥1 day: 50.6% (14.0-74.0%)      |                              |
|  |                                                                                                               |       |                            |                                |                                  |                                                                                                           | ≥8 days: 65.5% (23.3-87.5%)     |                              |
|  |                                                                                                               |       |                            |                                |                                  |                                                                                                           | ≥15 days: 76.7% (30.3-95.3%)    |                              |
|  |                                                                                                               | (299) | Test-negative case-control | 1/7/2021 to 31/7/2021 US.      | 1,000                            | Symptomatic infection                                                                                     | 51% (95% CI: -2-76%)            |                              |
|  |                                                                                                               | (256) | Observational              | 14/12/2020 to 14/8/2021 US.    | Delta: 2,840<br>Pre-Delta: 7,012 | Infection – Delta                                                                                         | 14–119 days: 85% (68-93%)       |                              |
|  |                                                                                                               |       |                            |                                |                                  |                                                                                                           | 120–149 days: 81% (34-95%)      |                              |
|  |                                                                                                               |       |                            |                                |                                  | Infection – Pre-Delta                                                                                     | ≥150 days: 73% (49-86%)         |                              |
|  |                                                                                                               |       |                            |                                |                                  |                                                                                                           | 91% (81-96%)                    |                              |
|  |                                                                                                               |       |                            |                                |                                  | [NOTE: 2% of study participants received Ad26.COVS.2 (65% received BNT162b2, and 33% received mRNA-1273)] |                                 |                              |
|  |                                                                                                               | (300) | Cohort                     | March to July 2021 US.         | 1,914,670                        | Infection                                                                                                 | 79% (77-80%)                    |                              |
|  |                                                                                                               |       |                            |                                |                                  | Hospitalisation                                                                                           | 81% (79-84%)                    |                              |
|  |                                                                                                               | (301) | Retrospective cohort       | 27/2/2021 to 22/7/2021 US.     | 97,787                           | Infection                                                                                                 | ≥1 day: 73.6% (65.9-79.9%)      |                              |
|  |                                                                                                               |       |                            |                                |                                  |                                                                                                           | ≥8 days: 72.9% (64.2-79.9%)     |                              |
|  |                                                                                                               |       |                            |                                |                                  |                                                                                                           | ≥15 days: 74.2% (64.9-81.6%)    |                              |
|  |                                                                                                               | (282) | Prospective cohort         | 1/5/2021 to 3/9/2021 US.       | 8,690,825                        | Infection - 18-49 years old                                                                               |                                 | ≥14 days: 89% (86.5-91.5%)   |
|  |                                                                                                               |       |                            |                                |                                  | Infection - 50-64 years old                                                                               |                                 | ≥14 days: 86.1% (82.5-89.6%) |
|  |                                                                                                               |       |                            |                                |                                  | Infection - ≤65 years old                                                                                 |                                 | ≥14 days: 80.8% (75.2-86.5%) |
|  |                                                                                                               |       |                            |                                |                                  | Hospitalisation - 18-49 years old                                                                         |                                 | ≥14 days: 95.7% (91.1-98.3%) |
|  |                                                                                                               |       |                            |                                |                                  | Hospitalisation - 50-64 years old                                                                         |                                 | ≥14 days: 87.5% (82.4-91.4%) |
|  |                                                                                                               |       |                            |                                |                                  | Hospitalisation - ≤65 years old                                                                           |                                 | ≥14 days: 85.2% (81.1-88.6%) |
|  |                                                                                                               |       |                            |                                |                                  |                                                                                                           |                                 |                              |
|  | <b>Moderna (mRNA-1273) - mRNA</b>                                                                             | (245) | Test-negative case-control | 14/12/2020 to 3/8/2021 Canada. | 682,071                          | Symptomatic infection – Alpha                                                                             | ≥14 days: 83% (80-86%)          | ≥7 days: 92% (86-96%)        |
|  | Two doses (100µg, 0.5ml each) intramuscularly (deltoid) with a recommended interval of 28 days between doses. |       |                            |                                |                                  | Symptomatic infection – Beta or Gamma                                                                     | ≥14 days: 77% (63-86%)          |                              |
|  |                                                                                                               |       |                            |                                |                                  | Symptomatic infection – Delta                                                                             | ≥14 days: 72% (57-82%)          |                              |
|  |                                                                                                               |       |                            |                                |                                  | Hospitalisation - Alpha                                                                                   | ≥14 days: 79% (74-83%)          | ≥7 days: 94% (89-97%)        |
|  |                                                                                                               |       |                            |                                |                                  | Hospitalisation – Beta or Gamma                                                                           | ≥14 days: 89% (73-95%)          |                              |
|  |                                                                                                               |       |                            |                                |                                  | Hospitalisation - Delta                                                                                   | ≥14 days: 96% (72-99%)          |                              |
|  |                                                                                                               | (246) | Retrospective case-control | January to July 2021 US.       | 60,083                           | Infection                                                                                                 |                                 | ≥14 days: 86% (81-90.6%)     |
|  |                                                                                                               |       |                            |                                |                                  | Hospitalisation                                                                                           |                                 | ≥14 days: 91.6% (81-97%)     |
|  |                                                                                                               |       |                            |                                |                                  | Admission to an ICU                                                                                       |                                 | ≥14 days: 93.3% (57-99.8%)   |
|  |                                                                                                               | (250) | Test-negative case-control | 17/1/2021 to 5/6/2021 Canada.  | 5,8476                           | Infection                                                                                                 | ≥14 days: 68.7% (59.5-75.9%)    | ≥7 days: 84.1% (34.9-96.1%)  |
|  |                                                                                                               | (252) | Test-negative case-control | 23/3/2021 to 7/9/2021          | 1 dose: 490,828                  | Infection - Delta                                                                                         | ≥14 days: 79.7% (60.8-89.5%)    | ≥14 days: 86.1% (78.0-91.3%) |



|  |       |                                   |                                      |                                        |                                                                                                           |                                                                                                                             |                                                                                    |
|--|-------|-----------------------------------|--------------------------------------|----------------------------------------|-----------------------------------------------------------------------------------------------------------|-----------------------------------------------------------------------------------------------------------------------------|------------------------------------------------------------------------------------|
|  |       |                                   |                                      | Qatar.                                 | 2 doses:<br>409,041                                                                                       |                                                                                                                             |                                                                                    |
|  | (255) | Observational                     | 1/3/2021 to<br>1/8/2021<br>US.       | 10,428,<br>783                         | Infection – Pre-Delta period                                                                              |                                                                                                                             | ≥14 days: 74.7% (66.2-81.1%)                                                       |
|  |       |                                   |                                      |                                        | Infection – Intermediate period                                                                           |                                                                                                                             | ≥14 days: 70.4% (60.1-78.0%)                                                       |
|  |       |                                   |                                      |                                        | Infection – Delta                                                                                         |                                                                                                                             | ≥14 days: 50.6% (45.0-55.7%)                                                       |
|  | (256) | Observational                     | 14/12/2020 to<br>14/8/2021<br>US.    | Delta:<br>2,840<br>Pre-Delta:<br>7,012 | Infection – Delta                                                                                         |                                                                                                                             | 14–119 days: 85% (68-93%)<br>120–149 days: 81% (34-95%)<br>≥150 days: 73% (49-86%) |
|  |       |                                   |                                      |                                        | Infection – Pre-Delta                                                                                     |                                                                                                                             | 91% (81-96%)                                                                       |
|  |       |                                   |                                      |                                        | [NOTE: 33% of study participants received mRNA-1273 (2% received Ad26.COV2.S, and 65% received BNT162b2)] |                                                                                                                             |                                                                                    |
|  | (258) | Observational                     | 1/12/2020 to<br>1/8/2021<br>UK.      | 384,543                                | Infection - Delta                                                                                         | 75% (64-83%)                                                                                                                |                                                                                    |
|  | (259) | Observational                     | April to May<br>2021.<br>Canada      | 124                                    | Infection                                                                                                 |                                                                                                                             | 52.5% (26.9-69.1%)                                                                 |
|  |       |                                   |                                      |                                        | Symptomatic infection                                                                                     |                                                                                                                             | 65.6% (33.8-82.1%)                                                                 |
|  |       |                                   |                                      |                                        | Severe infection                                                                                          |                                                                                                                             | 78.6% (47.9-91.2%)                                                                 |
|  | (272) | Retrospective<br>cohort           | 1/1/2021 to<br>31/3/2021<br>US.      | 4,722                                  | Infection                                                                                                 | >14 days after first, ≤14 days after second: 91.2% (80.6-96.1%)<br>>14 days: 98.6% (90.1-99.8%)                             |                                                                                    |
|  | (273) | Prospective<br>cohort             | 14/12/2020 to<br>10/4/2021<br>US.    | 3,975                                  | Infection                                                                                                 | ≥14 days after first, <14 days after second: 83% (40-95%)<br>≥14 days: 82% (20-96%)                                         |                                                                                    |
|  | (177) | Randomised<br>controlled<br>trial | 27/7/2020 to<br>23/10/2020<br>US.    | 30,420                                 | Infection                                                                                                 |                                                                                                                             | ≥14 days: 94.1% (89.3-96.8%)                                                       |
|  |       |                                   |                                      |                                        | Infection - ≥18 to <65 years of age                                                                       |                                                                                                                             | ≥14 days: 95.6% (90.6-97.9%)                                                       |
|  |       |                                   |                                      |                                        | Infection - ≥65 years of age                                                                              |                                                                                                                             | ≥14 days: 86.4% (61.4-95.2%)                                                       |
|  | (302) | Retrospective<br>cohort           | 16/7/2021 to<br>15/8/2021<br>US.     | 827                                    | Infection                                                                                                 |                                                                                                                             | ≥14 days: 56.6% (42.0-67.5%)                                                       |
|  |       |                                   |                                      |                                        | Symptomatic infection                                                                                     |                                                                                                                             | ≥14 days: 84.2% (56.4-94.3%)                                                       |
|  | (303) | Retrospective<br>cohort           | 22/12/2020 to<br>2/2/2021<br>US.     | 4,028                                  | Infection                                                                                                 | 8-42 days: 77.5% (61.2-87%)<br>15-42 days: 95% (86-98.2%)                                                                   |                                                                                    |
|  | (304) | Test negative<br>case-control     | 28/10/2020 to<br>10/5/2021<br>Qatar. | 256,037                                | Infection – Alpha                                                                                         | 0-6 days: 2.4% (0-21.7%)<br>7-13 days: 0.0% (0.0-11.9%)<br>14-20 days: 81.6% (73.1-87.8%)<br>21-27 days: 94.4% (89.1-97.5%) | 0-6 days: 98.0% (94.7-99.5%)<br>7-13 days: 99.2% (95.3-100.0%)                     |
|  |       |                                   |                                      |                                        |                                                                                                           | 0-6 days: 4.2% (0-15.1%)<br>7-13 days: 0.0% (0.0-0.0%)<br>14-20 days: 47.9% (39.5-55.2%)<br>21-27 days: 73.7% (67.6-78.8%)  | 0-6 days: 94.2% (92.1-95.9%)<br>7-13 days: 96.4% (94.3-97.9%)                      |
|  |       |                                   |                                      |                                        |                                                                                                           | 0-6 days: 18.7% (0-44.7%)<br>7-13 days: 0.0% (0.0-10.1%)                                                                    | 0-6 days: 100.0% (93.9-100.0%)<br>7-13 days: 100.0% (86.9-100.0%)                  |
|  |       |                                   |                                      |                                        |                                                                                                           | Any severe, critical, or fatal infection                                                                                    |                                                                                    |





|  |                                                                   |       |                             |                                 |             |                                                                                  |                                                          |                               |                              |
|--|-------------------------------------------------------------------|-------|-----------------------------|---------------------------------|-------------|----------------------------------------------------------------------------------|----------------------------------------------------------|-------------------------------|------------------------------|
|  |                                                                   |       | Test-negative case-control  | 19/1/2021 to 25/3/2021 Brazil.  |             | Symptomatic infection                                                            | ≥14 days: 35.1% (-6.6-60.5%)                             |                               |                              |
|  |                                                                   | (320) | Randomised controlled trial | 14/9/2020 to 5/1/2021 Turkey.   | 10,029      | Symptomatic infection                                                            | 14-27 days: 46.4% (0.4-71.2%)                            | ≥14 days: 83.5% (65.4-92.1%)  |                              |
|  |                                                                   |       |                             |                                 |             | Hospitalisation                                                                  |                                                          | ≥14 days: 100% (20.4-100%)    |                              |
|  |                                                                   | (321) | Randomised controlled trial | 21/7/2020 to 16/12/2020 Brazil. | 9,823       | Infection                                                                        | ≤14 days: -3.3% (-4.8- -1.9%)                            | ≥14 days: 50.7% (35.9-62%)    |                              |
|  |                                                                   |       |                             |                                 |             |                                                                                  | 14-28 days: 94.0% (55.1-99.2%)                           |                               |                              |
|  |                                                                   |       |                             |                                 |             |                                                                                  | ≤28 days: 42.5% (32.9-50.7%)                             |                               |                              |
|  |                                                                   |       |                             |                                 |             |                                                                                  | ≤42 days: 56.5% (49.6-62.5%)                             |                               |                              |
|  |                                                                   |       |                             |                                 |             |                                                                                  | ≤56 days: 60.4% (56.5-63.9%)                             |                               |                              |
|  |                                                                   |       |                             |                                 |             |                                                                                  | ≤70 days: 54.7% (53.2-56.1%)                             |                               |                              |
|  |                                                                   |       |                             |                                 |             |                                                                                  | ≤84 days: 53.7% (52.7-54.7%)                             |                               |                              |
|  |                                                                   |       |                             |                                 |             |                                                                                  | ≤98 days: 52.5% (51.9-53.1%)                             |                               |                              |
|  |                                                                   |       |                             |                                 |             |                                                                                  | Infection requiring medical assistance (hospitalisation) |                               | ≥14 days: 83.7% (58.0-93.7%) |
|  |                                                                   |       |                             |                                 |             |                                                                                  | Moderate infection                                       |                               | ≥14 days: 100% (56.4-100%)   |
|  |                                                                   |       |                             |                                 |             | Severe infection or death                                                        |                                                          | ≥14 days: 100% (16.9-100%)    |                              |
|  |                                                                   |       |                             |                                 |             | Infection - <21 days between 2 doses                                             |                                                          | ≥14 days: 49.1% (33-61.4%)    |                              |
|  |                                                                   |       |                             |                                 |             | Infection - ≥21 days between 2 doses                                             |                                                          | ≥14 days: 62.3% (13.9-83.5%)  |                              |
|  |                                                                   | (295) | Cohort                      | 17/1/2021 to 11/5/2021 Brazil.  | 313,328     | Death                                                                            | ≥21 days: 95.1% (94.7-95.5%)                             | ≥21 days: 99.1% (98.9-99.3%)  |                              |
|  |                                                                   |       |                             |                                 |             | Death – 75-79 years old                                                          | ≥21 days: 86.3% (84.7-87.7%)                             |                               |                              |
|  |                                                                   |       |                             |                                 |             | Death – 80-89 years old                                                          | ≥21 days: 97.6% (97.2-97.9%)                             |                               |                              |
|  |                                                                   |       |                             |                                 |             | Death - ≥90 years old                                                            | ≥21 days: 99.3% (99.1-99.5%)                             |                               |                              |
|  |                                                                   | (296) | Retrospective cohort        | 18/1/2021 to 30/6/2021 Brazil   | 60,577, 870 | Infection                                                                        | ≥14 days: 16.4% (15.2-17.5%)                             | 0-13 days: 40.3% (39.4-41.2%) |                              |
|  |                                                                   |       |                             |                                 |             |                                                                                  |                                                          | ≥14 days: 54.2% (53.4-55.0%)  |                              |
|  |                                                                   |       |                             |                                 |             | Hospitalisation                                                                  | ≥14 days: 26.6% (24.6-28.4%)                             | 0-13 days: 57.3% (56.0-58.6%) |                              |
|  |                                                                   |       |                             |                                 |             |                                                                                  |                                                          | ≥14 days: 72.6% (71.6-73.6%)  |                              |
|  |                                                                   |       |                             |                                 |             | ICU admission                                                                    | ≥14 days: 28.1% (24.9-31.1%)                             | 0-13 days: 58.1% (55.9-60.1%) |                              |
|  |                                                                   |       |                             |                                 |             |                                                                                  |                                                          | ≥14 days: 74.2% (72.6-75.7%)  |                              |
|  |                                                                   |       |                             |                                 |             | Death                                                                            | ≥14 days: 29.4% (26.7-32.0%)                             | 0-13 days: 58.7% (56.9-60.4%) |                              |
|  |                                                                   |       |                             |                                 |             |                                                                                  |                                                          | ≥14 days: 74% (72.6-75.3%)    |                              |
|  |                                                                   |       |                             |                                 |             |                                                                                  |                                                          |                               |                              |
|  | Bharat Biotech – Covaxin – whole virion inactivated virus vaccine | (322) | Randomised controlled trial | 16/11/2020 to 7/1/2021 India.   | 25 798      | Symptomatic infection                                                            |                                                          | ≥14 days: 77.8% (65.2-86.4%)  |                              |
|  |                                                                   |       |                             |                                 |             | Severe disease                                                                   |                                                          | ≥14 days: 93.4% (57.1-99.8%)  |                              |
|  |                                                                   |       |                             |                                 |             | Symptomatic infection – 18-59 years old                                          |                                                          | ≥14 days: 79.4% (66.0-88.2%)  |                              |
|  |                                                                   |       |                             |                                 |             | Symptomatic infection - ≥60 years old                                            |                                                          | ≥14 days: 67.8% (8.0-90.0%)   |                              |
|  |                                                                   |       |                             |                                 |             | Symptomatic infection – participants with pre-existing chronic medical condition |                                                          | ≥14 days: 66.2% (33.8-84.0%)  |                              |
|  |                                                                   |       |                             |                                 |             | Asymptomatic infection                                                           |                                                          | ≥14 days: 63.6% (29.0-82.4%)  |                              |



| Vaccine type                        | Vaccine                         | Company                                                                           | Countries approved for use in                                                                                                 | Clinical trials                                                                                                                                                                                                                                                                                                                                                                                                                                                           |
|-------------------------------------|---------------------------------|-----------------------------------------------------------------------------------|-------------------------------------------------------------------------------------------------------------------------------|---------------------------------------------------------------------------------------------------------------------------------------------------------------------------------------------------------------------------------------------------------------------------------------------------------------------------------------------------------------------------------------------------------------------------------------------------------------------------|
| <b>Inactivated virus</b>            | <b>KoviVac</b>                  | Chumakov Center (Moscow, Russia)                                                  | <b>3 countries:</b><br>Belarus, Cambodia, Russian Federation                                                                  | Phase 1: 502 (Russian Federation).<br>Phase 2:<br>502 (Russian Federation).<br>622 (Russian Federation).                                                                                                                                                                                                                                                                                                                                                                  |
|                                     | <b>QazVac</b>                   | Kazakhstan Research Institute for Biological Safety Problems (RIBSP) (Kazakhstan) | <b>2 countries:</b><br>Kazakhstan, Kyrgyzstan                                                                                 | Phase 1: NCT04530357 (Kazakhstan).<br>Phase 2: NCT04530357 (Kazakhstan).<br>Phase 3: NCT04691908 (Kazakhstan).                                                                                                                                                                                                                                                                                                                                                            |
|                                     | <b>KCONVAC</b>                  | Minhai Biotechnology Co. (Beijing, China)                                         | <b>2 countries:</b><br>China, Indonesia                                                                                       | Phase 1:<br>NCT05003479 (China).<br>ChiCTR2000038804, NCT04758273 (China).<br>Phase 2:<br>ChiCTR2000039462, NCT04756323 (China).<br>NCT05003466 (China).<br>Phase 3: NCT04852705                                                                                                                                                                                                                                                                                          |
|                                     | <b>COVIran Barekat</b>          | Shifa Pharmed Industrial Co. (Tehran, Iran)                                       | <b>1 country:</b><br>Iran                                                                                                     | Phase 1:<br>IRCT20201202049567N1 (Iran).<br>IRCT20201202049567N2 (Iran).<br>IRCT20171122037571N3 (Iran).<br>Phase 2:<br>IRCT20201202049567N3 (Iran).<br>IRCT20171122037571N3 (Iran).<br>Phase 3: IRCT20201202049567N3 (Iran).                                                                                                                                                                                                                                             |
|                                     | <b>Inactivated (Vero Cells)</b> | Sinopharm (Wuhan, China)                                                          | <b>2 countries:</b><br>China, Philippines                                                                                     | Phase 1: ChiCTR2000031809 (China)<br>Phase 2:<br>NCT04885764 (Egypt).<br>ChiCTR2000031809 (China).<br>Phase 3:<br>NCT04885764 (Egypt).<br>ChiCTR2000034780 (United Arab Emirates).<br>NCT04612972 (Peru).<br>NCT04510207 (Bahrain, Egypt, Jordan, United Arab Emirates).<br>ChiCTR2000039000 (Morocco).                                                                                                                                                                   |
|                                     | <b>Turkovac</b>                 | Health Institutes of Turkey (Istanbul, Turkey)                                    | <b>1 country:</b><br>Turkey                                                                                                   | Phase 1: NCT04691947 (Turkey).<br>Phase 2:<br>NCT04824391 (Turkey).<br>NCT04979949 (Turkey).<br>NCT05035238 (Turkey).<br>Phase 3:<br>NCT04942405 (Turkey).<br>NCT05077176 (Turkey).                                                                                                                                                                                                                                                                                       |
|                                     | <b>FAKHRAVAC (MIVAC)</b>        | Organization of Defensive Innovation and Research (Tehran, Iran)                  | <b>1 country:</b><br>Iran                                                                                                     | Phase 1: IRCT20210206050259N1 (Iran).<br>Phase 2: IRCT20210206050259N2 (Iran).<br>Phase 3: IRCT20210206050259N3 (Iran).                                                                                                                                                                                                                                                                                                                                                   |
| <b>Non-replicating viral vector</b> | <b>Convidecia</b>               | CanSino (Tianjin, China)                                                          | <b>10 countries:</b><br>Argentina, Chile, China, Ecuador, Hungary, Indonesia, Malaysia, Mexico, Pakistan, Republic of Moldova | Phase 1:<br>NCT05043259 (China).<br>ChiCTR2000030906, NCT04313127 (China).<br>NCT04568811 (China).<br>NCT04840992 (China).<br>Phase 2:<br>NCT05043259 (China).<br>NCT05162482 (Pakistan).<br>NCT04840992 (China).<br>ChiCTR2000031781, NCT04341389 (China).<br>NCT04566770 (China).<br>NCT05005156 (Argentina).<br>Phase 3:<br>NCT05169008 (Chile, Mexico).<br>NCT04526990 (Argentina, Chile, Mexico, Pakistan, Russian Federation).<br>NCT04540419 (Russian Federation). |
|                                     | <b>Sputnik Light</b>            | Gamaleya Research Institute of Epidemiology and                                   | <b>24 countries:</b><br>Angola, Argentina, Armenia, Bahrain, Belarus, Cambodia, Egypt, Iran, Kazakhstan,                      | Phase 1: NCT04713488 (Russian Federation).<br>Phase 2:<br>NCT04713488 (Russian Federation).                                                                                                                                                                                                                                                                                                                                                                               |



|                            |                                          |                                                                                           |                                                                                                                                                                                                                                                                                                                                                                                                                                                                                                                                                                                                                                                                                                                                                                                                                                                                                                                                                                                       |                                                                                                                                                                                                                                                                                                                                                                                                                                                                                                                                                                                                                                                                                                                                                                                                                        |
|----------------------------|------------------------------------------|-------------------------------------------------------------------------------------------|---------------------------------------------------------------------------------------------------------------------------------------------------------------------------------------------------------------------------------------------------------------------------------------------------------------------------------------------------------------------------------------------------------------------------------------------------------------------------------------------------------------------------------------------------------------------------------------------------------------------------------------------------------------------------------------------------------------------------------------------------------------------------------------------------------------------------------------------------------------------------------------------------------------------------------------------------------------------------------------|------------------------------------------------------------------------------------------------------------------------------------------------------------------------------------------------------------------------------------------------------------------------------------------------------------------------------------------------------------------------------------------------------------------------------------------------------------------------------------------------------------------------------------------------------------------------------------------------------------------------------------------------------------------------------------------------------------------------------------------------------------------------------------------------------------------------|
|                            |                                          | Microbiology<br>(Moscow, Russia)                                                          | Kyrgyzstan, Lao People's<br>Democratic Republic,<br>Mauritius, Mongolia,<br>Nicaragua, Philippines,<br>Republic of the Congo, Russian<br>Federation, San Marino,<br>Tunisia, Turkmenistan, United<br>Arab Emirates, United Republic<br>of Tanzania, Venezuela, West<br>Bank                                                                                                                                                                                                                                                                                                                                                                                                                                                                                                                                                                                                                                                                                                           | NCT05027672 (Argentina).<br>Phase 3: NCT04741061 (Russian<br>Federation).                                                                                                                                                                                                                                                                                                                                                                                                                                                                                                                                                                                                                                                                                                                                              |
|                            | <b>Sputnik V</b>                         | Gamaleya Research<br>Institute of<br>Epidemiology and<br>Microbiology<br>(Moscow, Russia) | <b>74 countries:</b><br>Albania, Algeria, Angola,<br>Antigua and Barbuda,<br>Argentina, Armenia,<br>Azerbaijan, Bahrain,<br>Bangladesh, Belarus, Bolivia,<br>Bosnia and Herzegovina, Brazil,<br>Cambodia, Cameroon, Chile,<br>Djibouti, Ecuador, Egypt,<br>Gabon, Ghana, Guatemala,<br>Guinea, Guyana, Honduras,<br>Hungary, India, Indonesia, Iran,<br>Iraq, Jordan, Kazakhstan,<br>Kenya, Kyrgyzstan, Lao<br>People's Democratic Republic,<br>Lebanon, Libya, Maldives, Mali,<br>Mauritius, Mexico, Mongolia,<br>Montenegro, Morocco,<br>Myanmar, Namibia, Nepal,<br>Nicaragua, Nigeria, North<br>Macedonia, Oman, Pakistan,<br>Panama, Paraguay, Philippines,<br>Republic of Moldova, Republic<br>of the Congo, Russian<br>Federation, Rwanda, Saint<br>Vincent and the Grenadines,<br>San Marino, Serbia, Seychelles,<br>Sri Lanka, Syrian Arab Republic,<br>Tunisia, Turkey, Turkmenistan,<br>United Arab Emirates,<br>Uzbekistan, Venezuela,<br>Vietnam, West Bank,<br>Zimbabwe | Phase 1:<br>NCT04760730 (United Arab Emirates).<br>NCT04684446 (Belarus, Russian Federation).<br>NCT04436471, 241 (Russian Federation).<br>NCT04437875 (Russian Federation).<br>Phase 2:<br>NCT05027672 (Argentina).<br>NCT04988048 (Argentina).<br>NCT04954092 (Russian Federation).<br>NCT04962906 (Argentina).<br>NCT04983537 (Argentina).<br>NCT04760730 (United Arab Emirates).<br>NCT04684446 (Belarus, Russian Federation).<br>NCT04686773 (Azerbaijan).<br>NCT04436471, 241 (Russian Federation).<br>NCT04437875 (Russian Federation).<br>NCT04587219 (Russian Federation).<br>NCT04640233 (India).<br>Phase 3:<br>NCT04564716 (Belarus).<br>NCT04530396 (Russian Federation).<br>NCT04642339 (Venezuela).<br>NCT04656613 (United Arab Emirates).<br>NCT04954092 (Russian Federation).<br>NCT04640233 (India). |
| <b>RNA</b>                 | <b>TAK-919 (Moderna<br/>formulation)</b> | Takeda (Tokyo, Japan)                                                                     | <b>1 country:</b><br>Japan                                                                                                                                                                                                                                                                                                                                                                                                                                                                                                                                                                                                                                                                                                                                                                                                                                                                                                                                                            | Phase 1: NCT04677660 (Japan).<br>Phase 2: NCT04677660 (Japan).                                                                                                                                                                                                                                                                                                                                                                                                                                                                                                                                                                                                                                                                                                                                                         |
| <b>DNA</b>                 | <b>ZyCoV-D</b>                           | Zyodus Cadila<br>(Ahmedabad, India)                                                       | <b>1 country:</b><br>India                                                                                                                                                                                                                                                                                                                                                                                                                                                                                                                                                                                                                                                                                                                                                                                                                                                                                                                                                            | Phase 1:<br>CTRI/2020/07/026352 (India).<br>CTRI/2021/03/032051 (India).<br>Phase 2:<br>CTRI/2020/07/026352 (India).<br>CTRI/2021/03/032051 (India).<br>Phase 3: CTRI/2021/01/030416 (India).                                                                                                                                                                                                                                                                                                                                                                                                                                                                                                                                                                                                                          |
| <b>Protein<br/>subunit</b> | <b>ZF2001</b>                            | Anhui Zhifei Longcom<br>(Hefei, China)                                                    | <b>3 countries:</b><br>China, Indonesia,<br>Uzbekistan                                                                                                                                                                                                                                                                                                                                                                                                                                                                                                                                                                                                                                                                                                                                                                                                                                                                                                                                | Phase 1:<br>NCT04445194 (China).<br>NCT04636333 (China).<br>NCT04550351, ChiCTR2000035691 (China).<br>NCT04961359 (China).<br>Phase 2:<br>NCT04466085 (China).<br>NCT05109598 (China).<br>NCT04813562 (China).<br>Phase 3:<br>NCT05091411 (China).<br>NCT05128643 (China).<br>NCT05107375 (China).<br>ChiCTR2000040153, NCT04646590 (China,<br>Ecuador, Indonesia, Pakistan, Uzbekistan).<br>ChiCTR2100050849 (China).                                                                                                                                                                                                                                                                                                                                                                                                 |
|                            | <b>Abdala</b>                            | Center for Genetic<br>Engineering and<br>Biotechnology (CIGB)<br>(Havana, Cuba)           | <b>6 countries:</b><br>Cuba, Mexico, Nicaragua,<br>Saint Vincent and the<br>Grenadines, Venezuela,<br>Vietnam                                                                                                                                                                                                                                                                                                                                                                                                                                                                                                                                                                                                                                                                                                                                                                                                                                                                         | Phase 1:<br>RPCEC00000345 (Cuba).<br>RPCEC00000346 (Cuba).<br>Phase 2:<br>RPCEC00000345 (Cuba)<br>RPCEC00000346 (Cuba).                                                                                                                                                                                                                                                                                                                                                                                                                                                                                                                                                                                                                                                                                                |

|    |                                                           |                                                               |                                                                                    |                                                                                                                                                                                                                                                                                                    |
|----|-----------------------------------------------------------|---------------------------------------------------------------|------------------------------------------------------------------------------------|----------------------------------------------------------------------------------------------------------------------------------------------------------------------------------------------------------------------------------------------------------------------------------------------------|
|    |                                                           |                                                               |                                                                                    | Phase 3: RPCEC00000359 (Cuba).                                                                                                                                                                                                                                                                     |
| 1  | <b>EpiVacCorona</b>                                       | FBRI (Koltsovo, Russia)                                       | <b>4 countries:</b><br>Cambodia, Russian<br>Federation, Turkmenistan,<br>Venezuela | Phase 1: NCT04527575 (Russian<br>Federation).<br>Phase 2: NCT04527575 (Russian<br>Federation).<br>Phase 3: NCT04780035 (Russian<br>Federation).<br>NCT05021016 (Russian Federation)                                                                                                                |
| 2  |                                                           |                                                               |                                                                                    |                                                                                                                                                                                                                                                                                                    |
| 3  |                                                           |                                                               |                                                                                    |                                                                                                                                                                                                                                                                                                    |
| 4  |                                                           |                                                               |                                                                                    |                                                                                                                                                                                                                                                                                                    |
| 5  |                                                           |                                                               |                                                                                    |                                                                                                                                                                                                                                                                                                    |
| 6  |                                                           |                                                               |                                                                                    |                                                                                                                                                                                                                                                                                                    |
| 7  |                                                           |                                                               |                                                                                    |                                                                                                                                                                                                                                                                                                    |
| 8  | <b>Aurora-CoV</b>                                         | FBRI (Koltsovo, Russia)                                       | <b>1 country:</b><br>Russian Federation                                            | Phase 1: 197 (Russian Federation).<br>Phase 2: 197 (Russian Federation).                                                                                                                                                                                                                           |
| 9  |                                                           |                                                               |                                                                                    |                                                                                                                                                                                                                                                                                                    |
| 10 | <b>MVC-COV1901</b>                                        | Medigen<br>Biotechnology Corp.<br>(Taipei City, Taiwan)       | <b>2 countries:</b><br>Somaliland, Taiwan                                          | Phase 1:<br>NCT05132855 (Taiwan).<br>NCT04487210 (Taiwan).<br>Phase 2:<br>NCT05132855 (Taiwan).<br>NCT04695652 (Taiwan, Vietnam).<br>NCT04822025 (Taiwan).<br>NCT04951388 (Taiwan).<br>NCT05038618 (Taiwan).<br>NCT05048849 (Taiwan).<br>NCT05054621 (Taiwan).<br>Phase 3: NCT05011526 (Paraguay)  |
| 11 |                                                           |                                                               |                                                                                    |                                                                                                                                                                                                                                                                                                    |
| 12 |                                                           |                                                               |                                                                                    |                                                                                                                                                                                                                                                                                                    |
| 13 |                                                           |                                                               |                                                                                    |                                                                                                                                                                                                                                                                                                    |
| 14 |                                                           |                                                               |                                                                                    |                                                                                                                                                                                                                                                                                                    |
| 15 |                                                           |                                                               |                                                                                    |                                                                                                                                                                                                                                                                                                    |
| 16 |                                                           |                                                               |                                                                                    |                                                                                                                                                                                                                                                                                                    |
| 17 |                                                           |                                                               |                                                                                    |                                                                                                                                                                                                                                                                                                    |
| 18 |                                                           |                                                               |                                                                                    |                                                                                                                                                                                                                                                                                                    |
| 19 |                                                           |                                                               |                                                                                    |                                                                                                                                                                                                                                                                                                    |
| 20 |                                                           |                                                               |                                                                                    |                                                                                                                                                                                                                                                                                                    |
| 21 | <b>SpikoGen</b>                                           | Vaxine/CinnaGen Co.<br>(Iran)                                 | <b>1 country:</b><br>Iran                                                          | Phase 1: NCT04453852 (Australia).<br>Phase 2:<br>IRCT20150303021315N23 (Iran).<br>NCT04944368, IRCT20150303021315N23<br>(Iran).<br>NCT05148871 (Australia).<br>Phase 3: NCT05005559,<br>IRCT20150303021315N24 (Iran).<br>NCT05148871 (Australia).<br>NCT05175625, IRCT20150303021315N26<br>(Iran). |
| 22 |                                                           |                                                               |                                                                                    |                                                                                                                                                                                                                                                                                                    |
| 23 |                                                           |                                                               |                                                                                    |                                                                                                                                                                                                                                                                                                    |
| 24 |                                                           |                                                               |                                                                                    |                                                                                                                                                                                                                                                                                                    |
| 25 |                                                           |                                                               |                                                                                    |                                                                                                                                                                                                                                                                                                    |
| 26 |                                                           |                                                               |                                                                                    |                                                                                                                                                                                                                                                                                                    |
| 27 |                                                           |                                                               |                                                                                    |                                                                                                                                                                                                                                                                                                    |
| 28 |                                                           |                                                               |                                                                                    |                                                                                                                                                                                                                                                                                                    |
| 29 |                                                           |                                                               |                                                                                    |                                                                                                                                                                                                                                                                                                    |
| 30 |                                                           |                                                               |                                                                                    |                                                                                                                                                                                                                                                                                                    |
| 31 | <b>Corbevax</b>                                           | Biological E Limited<br>(Telangana, India)                    | <b>1 country:</b><br>India                                                         | Phase 1: CTRI/2020/11/029032 (India).<br>Phase 2:<br>CTRI/2020/11/029032 (India).<br>CTRI/2021/06/034014 (India).<br>CTRI/2021/10/037066 (India).<br>Phase 3:<br>CTRI/2021/06/034014 (India).<br>CTRI/2021/08/036074 (India).<br>CTRI/2021/10/037066 (India).                                      |
| 32 |                                                           |                                                               |                                                                                    |                                                                                                                                                                                                                                                                                                    |
| 33 |                                                           |                                                               |                                                                                    |                                                                                                                                                                                                                                                                                                    |
| 34 |                                                           |                                                               |                                                                                    |                                                                                                                                                                                                                                                                                                    |
| 35 |                                                           |                                                               |                                                                                    |                                                                                                                                                                                                                                                                                                    |
| 36 |                                                           |                                                               |                                                                                    |                                                                                                                                                                                                                                                                                                    |
| 37 |                                                           |                                                               |                                                                                    |                                                                                                                                                                                                                                                                                                    |
| 38 |                                                           |                                                               |                                                                                    |                                                                                                                                                                                                                                                                                                    |
| 39 | <b>Soberana 02</b>                                        | Instituto Finlay de<br>Vacunas Cuba<br>(Havana, Cuba)         | <b>4 countries:</b><br>Cuba, Iran, Nicaragua,<br>Venezuela                         | Phase 1: IFV/COR/06 (Cuba).<br>Phase 2: IFV/COR/08 (Cuba).<br>Phase 3: IFV/COR/09 (Cuba).                                                                                                                                                                                                          |
| 40 |                                                           |                                                               |                                                                                    |                                                                                                                                                                                                                                                                                                    |
| 41 |                                                           |                                                               |                                                                                    |                                                                                                                                                                                                                                                                                                    |
| 42 | <b>Soberana Plus</b>                                      | Instituto Finlay de<br>Vacunas Cuba<br>(Havana, Cuba)         | <b>1 country:</b><br>Cuba                                                          | Phase 1:<br>IFV/COR/15 (Cuba).<br>IFV/COR/05 (Cuba).<br>Phase 2:<br>IFV/COR/11 (Cuba).<br>IFV/COR/15 (Cuba).<br>Phase 3: IFV/COR/09 (Cuba).                                                                                                                                                        |
| 43 |                                                           |                                                               |                                                                                    |                                                                                                                                                                                                                                                                                                    |
| 44 |                                                           |                                                               |                                                                                    |                                                                                                                                                                                                                                                                                                    |
| 45 |                                                           |                                                               |                                                                                    |                                                                                                                                                                                                                                                                                                    |
| 46 |                                                           |                                                               |                                                                                    |                                                                                                                                                                                                                                                                                                    |
| 47 |                                                           |                                                               |                                                                                    |                                                                                                                                                                                                                                                                                                    |
| 48 | <b>Razi Cov Pars</b>                                      | Razi Vaccine and<br>Serum Research<br>Institute (Karaj, Iran) | <b>1 country:</b><br>Iran                                                          | Phase 1: IRCT20201214049709N1 (Iran).<br>Phase 2: IRCT20201214049709N2 (Iran).<br>Phase 3: IRCT20201214049709N3 (Iran).                                                                                                                                                                            |
| 49 |                                                           |                                                               |                                                                                    |                                                                                                                                                                                                                                                                                                    |
| 50 |                                                           |                                                               |                                                                                    |                                                                                                                                                                                                                                                                                                    |
| 51 | <b>Recombinant SARS-<br/>CoV-2 Vaccine (CHO<br/>Cell)</b> | National Vaccine and<br>Serum Institute<br>(Beijing, China)   | <b>1 country:</b><br>United Arab Emirates                                          | Phase 1: NCT04869592 (China).<br>Phase 2: NCT04869592 (China)<br>Phase 3: NCT05069129 (United Arab<br>Emirates)                                                                                                                                                                                    |
| 52 |                                                           |                                                               |                                                                                    |                                                                                                                                                                                                                                                                                                    |
| 53 |                                                           |                                                               |                                                                                    |                                                                                                                                                                                                                                                                                                    |
| 54 |                                                           |                                                               |                                                                                    |                                                                                                                                                                                                                                                                                                    |
| 55 |                                                           |                                                               |                                                                                    |                                                                                                                                                                                                                                                                                                    |
| 56 |                                                           |                                                               |                                                                                    |                                                                                                                                                                                                                                                                                                    |
| 57 |                                                           |                                                               |                                                                                    |                                                                                                                                                                                                                                                                                                    |
| 58 |                                                           |                                                               |                                                                                    |                                                                                                                                                                                                                                                                                                    |
| 59 |                                                           |                                                               |                                                                                    |                                                                                                                                                                                                                                                                                                    |
| 60 |                                                           |                                                               |                                                                                    |                                                                                                                                                                                                                                                                                                    |



## **Supplementary file 1:**

### **1a: Specific database search terms:**

“transmission”, “host cell entry”, “clinical presentation”, “symptoms”, “risk factors”, “genetic risk”, “coronavirus”, “structure”, “genetics”, “replication”, open reading frame”, “structural proteins”, “accessory proteins”, “spike”, “receptor binding domain”, “mutation”, “variant of concern”, “variant of interest”, “alpha”, “beta”, “gamma”, “delta”, “omicron”, “lambda”, “mu”, “pfizer”, “BNT162b2”, “oxford-AtraZeneca”, “AZD1222”, “ChAdOx1”, “johnson and johnson”, “janssen”, “Ad26.COVID.2.S”, “moderna”, “mrna-1273”, “sinopharm”, “BBIBP-CorV”, “sinovac”, “CoronaVac”, “bharat biotech”, “Covaxin”, “BBV152”, “Novavax”, “Coalition for Epidemic Preparedness Innovations”, “Covovax”, “Nuvaxovid”, “NVX-CoV2372”, “immunogenicity” “antibody”, “neutralisation”, “reactogenicity”, “safety”, “adverse events”, “effectiveness”, “efficacy”, “immunity”, “booster”, “treatment”, “therapy”, “guideline”, “recommendations”.

### **1b: Selection of studies (inclusion/exclusion criteria):**

***Virology studies*** – preference was given to studies directly examining/discussing SARS-CoV-2, however, useful papers that explored the structure, genetics, and virology of coronaviruses in general were considered.

***Variant studies*** – in general, large epidemiological studies that explored the prevalence and risk of certain outcomes (e.g. hospitalisation, death, etc.) with COVID-19 infection for certain variants were included. Authors aimed to include studies from multiple countries.

***Vaccine studies*** – Studies with human derived data (e.g. blood sera, phase 1/2 trials) were of greatest interest when collating information on immunogenicity, reactogenicity, and safety. Large randomised controlled trials, test-negative case-control, and observational studies were of selected when exploring vaccine efficacy. Review articles summarising effectiveness studies were excluded, unless a meta-analysis was performed.

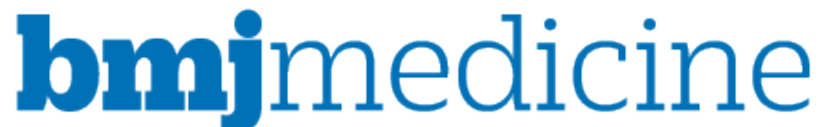**COVID-19: Virology, variants, and vaccines**

|                               |                                                                                                                                                                                                                                                                                                  |
|-------------------------------|--------------------------------------------------------------------------------------------------------------------------------------------------------------------------------------------------------------------------------------------------------------------------------------------------|
| Journal:                      | <i>BMJ Medicine</i>                                                                                                                                                                                                                                                                              |
| Manuscript ID                 | bmjmed-2021-000040.R2                                                                                                                                                                                                                                                                            |
| Article Type:                 | Specialist review                                                                                                                                                                                                                                                                                |
| Date Submitted by the Author: | 24-Feb-2022                                                                                                                                                                                                                                                                                      |
| Complete List of Authors:     | Young, Megan; Imperial College London, Faculty of Medicine<br>Crook, Harry; Imperial College London, Faculty of Medicine<br>Scott, Janet; University of Glasgow, Centre for Virus Research<br>Edison, Paul; Imperial College London, Faculty of Medicine; Cardiff University, School of Medicine |
| Keywords:                     | Covid-19, COVID-19, Virology                                                                                                                                                                                                                                                                     |
|                               |                                                                                                                                                                                                                                                                                                  |

SCHOLARONE™  
Manuscripts

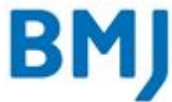

I, the Submitting Author has the right to grant and does grant on behalf of all authors of the Work (as defined in the below author licence), an exclusive licence and/or a non-exclusive licence for contributions from authors who are: i) UK Crown employees; ii) where BMJ has agreed a CC-BY licence shall apply, and/or iii) in accordance with the terms applicable for US Federal Government officers or employees acting as part of their official duties; on a worldwide, perpetual, irrevocable, royalty-free basis to BMJ Publishing Group Ltd ("BMJ") its licensees and where the relevant Journal is co-owned by BMJ to the co-owners of the Journal, to publish the Work in this journal and any other BMJ products and to exploit all rights, as set out in our [licence](#).

The Submitting Author accepts and understands that any supply made under these terms is made by BMJ to the Submitting Author unless you are acting as an employee on behalf of your employer or a postgraduate student of an affiliated institution which is paying any applicable article publishing charge ("APC") for Open Access articles. Where the Submitting Author wishes to make the Work available on an Open Access basis (and intends to pay the relevant APC), the terms of reuse of such Open Access shall be governed by a Creative Commons licence – details of these licences and which [Creative Commons](#) licence will apply to this Work are set out in our licence referred to above.

Other than as permitted in any relevant BMJ Author's Self Archiving Policies, I confirm this Work has not been accepted for publication elsewhere, is not being considered for publication elsewhere and does not duplicate material already published. I confirm all authors consent to publication of this Work and authorise the granting of this licence.

1  
2  
3 **COVID-19: Virology, variants, and vaccinations**  
4  
5

6 **Keywords:** Covid-19, Coronavirus, Virology, SARS-CoV-2 variants, Vaccines.  
7

8 **Megan Young<sup>1†</sup>, Harry Crook<sup>1†</sup>, Janet Scott<sup>2</sup>, Paul Edison<sup>1,3,\*</sup>**  
9

10  
11 <sup>1</sup> Faculty of Medicine, Imperial College London, London, UK.

12 <sup>2</sup> Medical Research Council-University of Glasgow Centre for Virus Research, University of  
13 Glasgow, UK

14 <sup>3</sup> School of Medicine, Cardiff University, Cardiff, UK.  
15

16  
17 † Both authors contributed equally to the manuscript  
18  
19

20 \*Corresponding author:

21 Dr Paul Edison, MD, MRCP, PhD, FRCP, FRCPI,

22 Clinical Senior Lecturer, Imperial College London and Honorary Professor, Cardiff University,  
23 UK

24 Division of Neurology, Faculty of Medicine, Imperial College London

25 Level 2, Commonwealth Building,

26 Hammersmith Campus, Imperial College London,

27 Du Cane Road, London, W12 0NN, UK  
28  
29  
30

31  
32 Tel: +442075941081

33 E-mail: paul.edison@imperial.ac.uk  
34  
35  
36

37 No authors have any competing interests.  
38  
39  
40  
41  
42  
43  
44  
45  
46  
47  
48  
49  
50  
51  
52  
53  
54  
55  
56  
57  
58  
59  
60

## **Abstract**

As of 25<sup>th</sup> January 2022, there have been over 349 million confirmed cases of COVID-19, with over 5.59 million confirmed deaths associated with the SARS-CoV-2 virus. The COVID-19 pandemic has prompted an extensive, global effort to study the molecular evolution of the virus and develop vaccines to combat its spread. Although rigorous determination of SARS-CoV-2 infectivity remains elusive, due to the continuous evolution of the virus, steps have been made to understand its genome, structure, and emerging genetic mutations. The SARS-CoV-2 genome is composed of several open reading frames (ORFs) and structural proteins, including the spike protein, which is essential for entry into host cells. As of 25<sup>th</sup> January 2022, the WHO reports five variants of concern (VOC) two variants of interest (VOI) and three variants under monitoring (VUM). The mutations harboured in these variants confer an increased transmissibility, severity of disease, and escape from neutralising antibodies compared to the primary strain. The current vaccine strategy, including booster doses, provides protection from severe disease. As of 24<sup>th</sup> January 2022, there are 33 approved vaccines in use in 197 countries. In this review, we discuss the genetics, structure and transmission methods of SARS-CoV-2 and its variants, highlighting how mutations provide enhanced abilities to spread and inflict disease. We also outline the vaccines currently in use around the world, providing evidence for the immunogenicity and effectiveness of each.

## **Introduction**

There are seven coronaviruses that infect humans, all belonging to either alpha- or beta-coronavirus subgroups, including 229E (alpha), NL63 (alpha), OC43 (beta), and HKU1 (beta)(1). Over the last two decades, three notable beta-coronaviruses, severe acute respiratory syndrome coronavirus (SARS-CoV) in 2002, Middle East respiratory syndrome coronavirus (MERS-CoV) in 2011, and most recently, severe acute respiratory syndrome 2 (SARS-CoV-2) in 2019, have emerged and caused severe illness resulting in debilitating disease and worldwide fatalities. SARS-CoV-2 is the pathogen responsible for the current Coronavirus 2019 (COVID-19) pandemic and has caused more than 5.59 million deaths in approximately two years and resulted in multisystem illness in several million people(2).

All viruses change and mutate over time, with most changes having little to no impact. However, some mutations may alter its pathogenic or transmission potential and could, therefore, increase disease severity or hinder the effectiveness of vaccines and therapeutic strategies. The World Health Organisation (WHO) (3) classify SARS-CoV-2 variants that increase transmissibility, disease severity or virulence, or decrease the effectiveness of public health measures, diagnostics, therapeutics, or vaccines as variants of concern (VOC). Variants with genetic changes that are predicted to enhance the virulence and transmissibility of the virus which have been identified to cause community transmission in multiple countries posing a possible risk to global public health are defined as variants of interest (VOI). Lastly, the WHO defines variants with genetic changes that are suspected to affect virus characteristics and have currently unclear phenotypic or epidemiological effects as variants under monitoring (VUM). VUM are not typically assigned a name until they are upgraded to VOI or VOC. The full working definitions of VOC, VOI and VUM can be found on the WHO 'tracking SARS-CoV-2 variants' website: [www.who.int/en/activities/tracking-SARS-CoV-2-variants/](http://www.who.int/en/activities/tracking-SARS-CoV-2-variants/)(3). As of 25<sup>th</sup> January 2022, the WHO reports five VOC; Alpha, Beta, Gamma, Delta and Omicron, two VOI;

1  
2  
3 Lambda and Mu, and three VUM(3). Former VOC/VOI/VUM have been reclassified as  
4 ‘formerly monitored variants’ due to them either no longer circulating, having little impact on  
5 the epidemiological situation, or having no concerning properties(3). Since the beginning of  
6 the COVID-19 pandemic, the rapid development of effective COVID-19 vaccines has taken  
7 place around the world. As of 24<sup>th</sup> January 2022, there are 33 approved vaccines in use in 197  
8 countries, with ten vaccines having gained emergency use listing approval from the WHO(4).  
9

10  
11 In this review, we provide an overview of the genome and structure of SARS-CoV-2,  
12 describing how these elements allow the virus to infect and replicate inside of host cells, before  
13 outlining how certain mutations harboured by SARS-CoV-2 variants enhance these abilities.  
14 Next, we examine the current state of vaccine development around the world and provide  
15 evidence of the effectiveness of booster doses.  
16  
17  
18

### 19 **Methods**

20 We searched PubMed and Embase databases for COVID-19-related articles published  
21 between 1<sup>st</sup> January 2020 and 25<sup>th</sup> January 2022 and for general coronavirus-related articles  
22 published from 1<sup>st</sup> January 2000 onwards. Our search terms included SARS-CoV-2, COVID-  
23 19, and specific terms including virology, genome, variants, and vaccine. Additional, specific  
24 search terms are outlined in supplementary file 1. We performed further manual searching for  
25 additional articles and data using relevant databases, including who.int, gov.uk, and  
26 ecdc.europa.eu/en. Due to the rapidly evolving nature of the literature involving SARS-CoV-  
27 2, we also searched preprint databases including MedRxiv and BioRxiv. Due to the various  
28 topics addressed here, studies were selected through different criteria, details of which can be  
29 found in supplementary file 1. Overall, studies were selected based on quality and impact factor  
30 of publishing journal, with real-world studies with large sample sizes of greatest interest.  
31  
32  
33  
34  
35

### 36 **Viral transmission, clinical presentation, and genetic susceptibility of COVID-19**

37 SARS-CoV-2 is predominantly spread via respiratory droplet transmission, spreading  
38 between people through close contact, coughing, or sneezing. It has been documented that the  
39 virus can also spread through airborne transmission, fomite transmission, and via other modes,  
40 such as through biological material including urine and faeces, and through (5, 6). The SARS-  
41 CoV-2 virus may survive on surfaces or suspended in air droplets for long periods of time.  
42 Indeed, on plastic, stainless steel, and glass surfaces, the half-life of the virus is around 5.3, 4.4,  
43 and 4.2 hours, respectively(7), with no difference seen between SARS-CoV-2 variants(8).  
44 Although SARS-CoV-2 can be detected on inanimate surfaces for hours and days, due to the  
45 evaporation of water droplets, the viruses’ living environment, the concentration of the virus  
46 plummets rapidly(9). Protective measures, including using personal protective equipment  
47 (PPE), maintaining indoor ventilation, and disinfecting hands and surfaces, can effectively  
48 limit the spread of SARS-CoV-2(10).  
49  
50  
51  
52  
53

54 Once inside the airways, SARS-CoV-2 can directly or indirectly infect ciliated, mucus-  
55 secreting, and club cells of bronchial epithelium, type 1 pneumocytes within the lungs, and the  
56 conjunctival mucosa(11). The clinical presentation of COVID-19 is non-specific,  
57 heterogeneous, and infection can result in a wide spectrum of symptoms. Following an  
58 incubation period of 4-14 days, symptoms develop ranging from mild to severe disease and, in  
59 some cases, can result in death(12). The most common COVID-19 symptoms include fever,  
60

1  
2  
3 cough, dyspnoea, and fatigue(13, 14), while myalgia, gastrointestinal issues, cognitive deficits,  
4 and other symptoms are reported. Asymptomatic individuals can also test positive for COVID-  
5 19(15, 16). Although the entire population is susceptible to COVID-19 infection, some  
6 subgroups within the general population exist that are more susceptible to developing poorer  
7 clinical outcomes.  
8  
9

10 Risk factors associated with increased risk of hospitalisation, severe disease, and fatal  
11 outcome with COVID-19 have been identified. Older age(17-19), male sex(20, 21), non-white  
12 ethnicity(21, 22), comorbidities including diabetes, hypertension, and lung disease(18, 23-25),  
13 malignancy and immunodeficiency(26-28) have all been associated with more severe COVID-  
14 19. The duration of symptoms endured by COVID-19 patients, as well as the treatment they  
15 receive will also have profound influences on the severity of disease they experience and both  
16 the acute and long-term outcomes following recovery. The host genetic background is thought  
17 to have an influence on the susceptibility and severity of COVID-19, possibly explaining the  
18 broad spectrum of clinical manifestations that can develop in seemingly similar individuals. A  
19 study examining individuals with COVID-19 across numerous ancestry groups identified four  
20 gene loci associated with susceptibility to COVID-19; SLC6A20, RPL24, ABO, PLEKHA4,  
21 and nine associated with increased risk of severe COVID-19; LZTFL1, FOXP4, TMEM65,  
22 OAS1, KANSL1, TAC4, DPP9, RAVR1, and IFNAR2(29). Meanwhile, genome-wide  
23 association studies spanning across Europe, the United States (US), and the United Kingdom  
24 (UK) identified a gene cluster on chromosome three (chr3p21.31) as being strongly linked with  
25 susceptibility and severity of COVID-19(30, 31). Polymorphisms in the angiotensin-  
26 converting enzyme 2 (ACE2) receptor and transmembrane protease serine 2 (TMPRSS2) have  
27 also been shown to enhance SARS-CoV-2 viral entry(32, 33), with differential polymorphisms  
28 seen across ethnic populations, which may partly explain why certain ethnic groups are more  
29 susceptible to severe COVID-19. Increased ACE2 receptor levels have also been associated  
30 with other risk factors of COVID-19 including smoking and increasing age(34). The use of  
31 polygenetic risk scores (PRS) may be useful in determining an individual's risk for developing  
32 severe disease caused by COVID-19(35). A PRS infers a person's risk of susceptibility to, or  
33 development of a certain disease based on the total number of genomic variations they possess.  
34 Determining PRS with the inclusion of comorbidities, such as chronic obstructive pulmonary  
35 disease(36), or other aspects, such as coagulation factors(37), may improve the usefulness of  
36 PRS in determining a person's risk of severe COVID-19.  
37  
38  
39  
40  
41  
42  
43  
44  
45  
46

### **Virology of SARS-CoV-2**

47 SARS-CoV-2 is a positive-stranded ribonucleic acid (RNA) virus belonging to  
48 Coronaviridae family. Coronaviruses, which have crownlike appearances, are the largest  
49 known RNA viruses and are thought to primarily infect vertebrates(38, 39). SARS-CoV-2  
50 belongs to the beta genus of the coronaviruses and has a genome varying from 29.8kb to 29.9kb  
51 in size(40). Human coronaviruses (HCoV) genomes consist of a variable number of open  
52 reading frames (ORFs). Following the typical 5'-3' order, the beginning two-thirds of the  
53 SARS-CoV-2 genome contains two ORFs, ORF1a and ORF1b which, inside the host cell, are  
54 translated at the rough endoplasmic reticulum into polyprotein 1a (pp1a) and polyprotein 1ab  
55 (pp1ab), respectively(40). These polyproteins are cleaved into 16 non-structural proteins (nsp);  
56 nsp1-11, from pp1a and nsp12-16, from pp1ab. The proteolytic release of nsp1 occurs rapidly,  
57  
58  
59  
60

1  
2  
3 which enables it to interfere with translation processes of the host cell by inducing cellular  
4 mRNA degradation(41-43). Nsp2-16 contain the viruses' replication and transcription complex  
5 (RTC) and encode multiple enzymes with many functions including, proteases, helicase,  
6 polymerase, exo- and endo-nuclease, N7- and 2'O-methyltransferases, and de-ubiquitination  
7 enzymes(44, 45). The final third of HCoV genomes contain genes that encode structural and  
8 accessory proteins. The four major structural proteins encoded here are the nucleocapsid (N),  
9 membrane (M), envelope (E), and spike glycoprotein (S) proteins(46, 47). The N protein is  
10 associated with the viral RNA genome and is involved in RNA synthesis regulation and  
11 interacts with the M protein during viral budding(39, 48). The M protein is important for viral  
12 assembly, it contains a short N-terminal domain that projects onto the external surface of the  
13 envelope and a long internal C terminus(39). The E protein function is largely unknown;  
14 however, along with the N and M proteins, it is required for viral assembly and release(47) .  
15 Lastly, the S protein gives coronaviruses their characteristic spikes that compose their  
16 crownlike appearance. This protein projects through the viral envelope, is heavily glycosylated,  
17 and regulates host cell membrane receptor binding and fusion of the viral and cellular  
18 membrane(49). The functions of the eleven accessory proteins encoded within the one-third  
19 closest to the 3' end of the SARS-CoV-2 genome are not fully understood. These accessory  
20 proteins are encoded by the ORF3a, ORF3b, ORF3c, ORF3d, ORF6, ORF7a, ORF7b, ORF8,  
21 ORF9b, ORF9c, and ORF10 genes. Some of these proteins, including ORF3b, ORF6, ORF7a  
22 and ORF8 are interferon antagonists which impair the host cell immune response(50-53), while  
23 ORF3a may promote virus release(54) and is involved in apoptosis of host cells through  
24 caspase-3 activation(55). ORF9b and ORF9c are known to suppress the host antiviral response  
25 by interacting with host cell organelles(56-58), while a clear understanding of the functions of  
26 ORF3c, ORF7b, and ORF10 remains elusive(59). **Figure 1** (A and B) depicts the genome and  
27 structure of SARS-CoV-2.

28  
29  
30  
31  
32  
33  
34  
35  
36  
37  
38  
39  
40  
41  
42  
43  
44  
45  
46  
47  
48  
49  
50  
51  
52  
53  
54  
55  
56  
57  
58  
59  
60  
The S glycoprotein is composed of two functionally distinct subunits (S1 and S2) and is essential for viral entry into host cells. The N-terminal S1 domain of the protein contains the receptor-binding domain (RBD) that directly interacts with the ACE2 receptor on the host cell, the primary receptor that SARS-Cov-2 utilises for cell entry(60). The C-terminal S2 domain fuses the host and viral membranes to allow for entry of the viral genome into the host cell(61). The subunits of the trimeric S complex are either in a closed (pre-fusion stage) or open (post-fusion stage) conformation(62), with one subunit always in an open conformation to allow for ACE2 recognition and binding(63). The RBD itself consists of five anti-parallel  $\beta$ -strands surrounded by several  $\alpha$ -helices(64). From closed to open conformation, the RBD undergoes structural rearrangement whereby the globular head region rotates clockwise, which alters its electropotential surface(64). Once positioned, numerous residues within the RBD form either hydrogen bonds or salt bridges with residues of the ACE2 receptor, allowing for tight binding(65), while the concave structure of the RBD allows for three distinct binding regions(64). Following binding between the S protein and the host cell receptor, host cell proteases cleave the S protein, causing the release of the S2 domain which allows for fusion and cell entry(66). **Figure 1** (C and D) demonstrate the structure and function of the S protein.

The ACE2 receptor is expressed in numerous cell types throughout the human body, including in the lungs, oral and nasal mucosa, heart, gastrointestinal tract, kidneys, liver, spleen, and brain(67), highlighting the widespread infection that SARS-CoV-2 can inflict.



1  
2  
3  
4  
5  
6  
7  
8  
9  
10  
11  
12  
13  
14  
15  
16  
17  
18  
19  
20  
21  
22  
23  
24  
25  
26  
27  
28  
29  
30  
31  
32  
33  
34  
35  
36  
37  
38  
39  
40  
41  
42  
43  
44  
45  
46  
47  
48  
49  
50  
51  
52  
53  
54  
55  
56  
57  
58  
59  
60

Meanwhile, TMPRSS2, a host cell protease, facilitates fusion of the viral and host cell membranes(68), and may play a role in the spread of the virus in the airways(68). Host cell cathepsin L may also aid in SARS-CoV-2 cell entry by cleaving the S protein(69). Indeed, a clinically approved protease inhibitor has been shown to block SARS-CoV-2 cell entry(70). **Figure 2** depicts the mechanism by which SARS-CoV-2 gains entry into and replicates inside host cells, and summarises the host cell immune response.

### **Variants of SARS-CoV-2**

Most viral mutations have a limited impact on the viruses' ability to infect, replicate, escape host immunity, and transmit, however, certain mutations may give a viral strain a competitive advantage and, through natural selection, give it the ability to become dominant. Many of the mutations observed in SARS-CoV-2 variants are found within the RBD or the N-terminal domain of the S protein, which alters the three-dimensional structure of the S protein. Not only can these changes affect the transmission abilities of the virus but can also allow it to better escape the immune response, including from neutralising antibodies either elicited through vaccine administration or natural infection.

The SARS-CoV-2 virus has mutated numerous times, with estimates suggesting that circulating lineages acquire nucleotide mutations at rates of around one to two mutations per month(71). The current method of identifying variants relies on the use of genomic testing such as whole genome sequencing, partial S-gene sequencing, or nucleic acid amplification technique (NAAT)-based assays(72). The aspects of different variants that most people experience, however, is the clinical symptoms they inflict. Certain variants induce a greater risk of severe disease and death, such as Alpha and Delta(73), while others are more likely to induce milder symptoms, such as Omicron(74, 75). Moreover, individual symptoms can differ between variants. For example, the Gamma variant is associated inflicting anosmia and dysgeusia(76), which is less commonly seen in Omicron infections. Moving forward, the clinical themes and symptoms associated with emerging variants should be elucidated rapidly so that the public and healthcare professionals can rapidly identify possible cases of COVID-19.

The WHO have tracked and monitored SARS-CoV-2 variants since the COVID-19 pandemic began to identify VOCs. As of 25<sup>th</sup> January 2022, the WHO reports five VOC, two VOI, and three VUM(3) (**Table 1**). Herein, we report studies that compare SARS-CoV-2 variants to the 'primary' virus strain. 'Primary strain' refers to the strain of the virus that first emerged in Wuhan, China at the end of 2019 and spread around the world in the first wave of infections, which is often also referred to as the Wuhan-Hu-1, B.1, or wild-type strain.

### **Variants of concern**

#### ***Alpha***

The Alpha SARS-CoV-2 variant, of the B.1.1.7 lineage, was first documented in the UK in September 2020 and classified as a VOC on 18<sup>th</sup> December 2020(3, 77). This variant contains S protein mutations which have potential biological effects. Firstly, the S protein residue 501, a key contact residue within the RBD, forms a portion of the binding loop in the contact region of the ACE2 receptor, forms a hydrogen bond with the Y41 residue of the ACE2 receptor, and stabilises the ACE2 K353 residue(65, 78, 79). Alpha harbours an N501Y

1  
2  
3 mutation which increases the binding affinity of the RBD to the ACE2 receptor(80). Next, the  
4 P681H mutation contained within the Alpha variant is located immediately adjacent to the 682-  
5 685 furin cleavage site, at the interface of the S1 and S2 domains(81). The S1/S2 furin cleavage  
6 site prompts entry into respiratory epithelial cells and partly determines the transmissibility of  
7 the virus(82-84), while the P681H mutation makes the furin cleavage site less acidic, meaning  
8 it is more effectively recognised and cleaved(85, 86). Alpha also contains a D614G mutation,  
9 located within the S1/S2 furin cleavage site, which increases SARS-CoV-2 binding affinity to  
10 the ACE2 receptor and increases infectivity(87). Other mutations harboured within the Alpha  
11 variant enhance the ability of the virus to escape antibody detection, such as the two amino  
12 acid deletion at the sites 69-70 in the N-terminal domain of the S protein(88, 89), while other  
13 mutations demonstrate limited or no effects(90). In February 2021, viruses of the B.1.1.7  
14 lineage with the added S protein mutation E484K were identified, which may have threatened  
15 vaccine effectiveness due to the mutation conferring an increased resistance to neutralising  
16 vaccine-elicited and monoclonal antibodies(91). This mutation had limited effects, however,  
17 and variants containing it failed to dominate.

23 Epidemiological studies explored the Alpha variant, with a case-control study of 27,633  
24 respiratory samples originating from 20 primary care centres in Madrid, Spain, finding that the  
25 probability of admission to an intensive care unit (ICU) was twice as high in patients infected  
26 with the Alpha variant compared to those infected with the primary strain(92). Furthermore,  
27 this variant became the dominant strain within four months, and led to an increase in disease  
28 burden as a result(92).

31 Meanwhile in Cannes, France, infection with the Alpha variant was associated with a  
32 3.8-fold higher risk of transfer to an ICU or death compared to the primary strain, as determined  
33 through a retrospective cohort study of 158 COVID-19 patients(93). A large retrospective  
34 cohort study found that, during the third COVID-19 wave in Canada, where 91% of infections  
35 were caused by the Alpha variant, the risk of both hospitalisation (adjusted odds ratio  
36 (aOR)=1.57) and death (aOR=1.52) was higher compared to primary strain infections(94).  
37 Overall, the Alpha variant was approximately 50-70% more transmissible and was associated  
38 with a 30-60% increased risk of hospitalisation and death compared to the primary strain(95-  
39 100).

43 The Alpha variant was found to have a minimal impact on the effectiveness of current  
44 vaccines(101, 102), while the risk of reinfection remained similar for this variant as with  
45 previous ones(103). On 3<sup>rd</sup> September 2021, the European Centre for Disease Prevention and  
46 Control (ECDC) reclassified the Alpha, and the Alpha+E484K mutation variants from a VOC  
47 to a 'de-escalated variant' (104).

### 49 **Beta**

51 The Beta SARS-CoV-2 variant, of the B.1.351 lineage, was first documented in South  
52 Africa in May 2020(3). This variant contains five S protein mutations of interest: N501Y,  
53 E484K, D614G, K417N, and A701V. Like the Alpha variant, Beta contains the mutations  
54 N501Y, E484K, and D614G, which increase ACE2 receptor binding affinity(80, 87), increase  
55 virulence(105), and enhance resistance to neutralising antibodies(91, 106). The K417 residue  
56 of the SARS-CoV-2 S protein interacts with the D30 residue of the ACE2 receptor, forming a  
57 salt bridge across the central contact region(65, 78), however, the K417N mutation appears to  
58  
59  
60

1  
2  
3 have a limited impact on ACE2 receptor binding(80). The A701V mutation is located close to  
4 the furin cleavage site but has a minimal impact on transmissibility or antibody resistance(101).  
5

6 In a genomic and epidemiological study, it was concluded that the Beta SARS-CoV-2  
7 variant had a selective advantage over previous variants from its increased transmissibility and  
8 immune escape abilities(107, 108), while the E484K/N501K mutations significantly enhanced  
9 the binding affinity of Beta and, hence, increased its transmissibility(109). A retrospective  
10 cohort study of 22,068 participants found that infection with the Beta variant was associated  
11 with an increased hospitalisation risk compared to an infection with a non-VOC (hazard ratio  
12 (HR)=2.30)(100). Overall, Beta is approximately 25-50% more transmissible, is associated  
13 with a possible increase in risk of hospital mortality, and has enhanced resistance to antibody  
14 neutralisation compared to previous variants(107, 108, 110).  
15  
16  
17  
18

### 19 **Gamma**

20 The Gamma variant is of the P.1 lineage and was first reported in November 2020 from  
21 travellers returning to Japan from Brazil, and was later discovered in Brazil(3, 111). This  
22 variant contains the S protein mutations of interest; K417T, E484K, N501Y, D614G, and  
23 H655Y(104). As mentioned, the N501Y and D614G mutations increase ACE2 receptor  
24 binding affinity and increase infectivity of the virus(80, 87). The N501Y, K417N/T, and E484K  
25 mutation trinity, meanwhile, is shared by both Gamma and Beta variants, and is associated with  
26 enhanced infectivity and lethality compared to the N501Y mutation alone, possibly due to  
27 tighter binding of the S protein to the ACE2 receptor due to increased electrostatic  
28 contribution(112). Gamma also possesses the H655Y mutation which was found to provide  
29 enhanced viral escape abilities from multiple human monoclonal antibodies *in vitro*(113).  
30  
31  
32  
33

34 The Gamma variant is associated with heightened transmissibility(109, 110, 114), with  
35 one study concluding that it possesses a 1.7- to 2.4-fold increased transmissibility compared to  
36 previous variants(115). Additionally, the wave of infections caused by the Gamma variant in  
37 Brazil was associated with a 13% increase in death rate compared to the previous wave,  
38 suggesting the greater virulence held by Gamma compared to previous viral strains(116).  
39

40 A surveillance study from seven European countries concluded that the Gamma variant  
41 was associated with a higher risk of hospitalisation (aOR=2.6) and admission to an ICU  
42 (aOR=2.2) when compared to non-VOC cases(117). In Manaus, Brazil the resurgence of  
43 COVID-19, despite high seroprevalence, suggested that the Gamma variant had a moderate  
44 resistance to neutralising antibodies(118), however, Gamma has been shown to be significantly  
45 less resistant to neutralising antibodies, compared to other variants, including Beta(119).  
46  
47  
48  
49

### 50 **4 Delta**

51 The Delta variant, from the B.1.617.2 lineage, was first documented in India in October  
52 2020 and was classified as a VOC on 11<sup>th</sup> May 2021(3). Of the S protein mutations of interest,  
53 the aforementioned P681H and D614G are also harboured by the Delta variant(104) and  
54 similarly impacts its ACE2 receptor binding affinity and transmissibility(106, 120, 121).  
55 Unlike the E484K mutation seen in previous variants, Delta contains the E484Q mutation  
56 which, along with a L452R mutation also located within the RBD, causes significantly higher  
57 affinity for the ACE2 receptor than the primary strain or the E484K mutation alone(122). The  
58 L452R mutation alone results in greater RBD-ACE2 receptor binding affinity and enhanced  
59  
60

1  
2  
3 escape from neutralising antibodies(123, 124). Lastly, the Delta variant contains the T478K  
4 mutation, located on the interface between the S protein and the ACE2 receptor when bound,  
5 which increases the electrostatic potential of the S protein and enhances binding affinity(125).  
6

7 The Delta variant quickly became the dominant variant in the UK(126), US(127),  
8 Europe, and around the world(128). The mutations present in the Delta variant, enhanced the  
9 transmissibility of the virus as a result of increased binding affinity to the ACE2 receptor(109).  
10 It was estimated that the reproduction number of the Delta variant is 97% greater than non-  
11 VOC/VOI and approximately three times that of the Alpha, Beta, and Gamma variants(110),  
12 which highlights the competitive advantage that this variant had over earlier ones and how it  
13 rapidly became the dominant strain globally. The fast replication rate of Delta likely contributes  
14 to its increased transmissibility compared to Alpha, Beta, and Gamma. From infected  
15 individuals, the Delta variant has been able to be detected by polymerase chain reaction (PCR)  
16 within the first four days from exposure, while non-Delta infections could only be detected  
17 after six days(129). Furthermore, viral loads of people infected with the Delta variant were  
18 found to be significantly higher than people infected with other strains(129), including  
19 Beta(130). Delta is also thought to better escape neutralisation, with the frequency of post-  
20 vaccination infections much higher for the Delta variant than infections with the primary strain  
21 in India(131) and blood sera samples from individuals who had received one dose of a COVID-  
22 19 vaccine showing minimal neutralisation of the Delta variant(132).  
23

24 The Delta variant is also associated with an increased disease severity. In Scotland,  
25 infection with the Delta variant was associated with an increased risk of hospitalisation  
26 (HR=1.85) compared to infection with the Alpha variant(133). Compared to non-VOC  
27 infections, North American retrospective cohort studies demonstrated that infection with Delta  
28 was associated with a 108%(134) or HR=2.3(100) increased risk of hospitalisation, a 234%  
29 increased risk for admission to an ICU, and a 132% increased risk of death(134). Lastly, a  
30 cross-sectional study of 6238 Delta and 3262 primary strain cases in India found that the risk  
31 of death was around 1.8 times higher for Delta infections, while Delta also infected and induced  
32 symptoms in a greater proportion of younger people (0-19 years old), compared to the primary  
33 strain(131).  
34

### 35 **Omicron**

36 The Omicron variant is of the B.1.1.529 lineage and was first discovered in November  
37 2021 in South Africa and Botswana before being detected in multiple countries and classified  
38 as a VOC on 26<sup>th</sup> November 2021(3). This variant contains over 30 S protein mutations(104),  
39 23 of which have been previously identified, including K417N, T478K, E484A, D614G,  
40 H655Y, P681H, and N501Y(135). 15 Omicron mutations are contained within the RBD(17)  
41 providing the variant with a significantly enhanced binding affinity to the ACE2 receptor(135,  
42 136). In addition, various single mutations harboured with the RBD of the Omicron variant  
43 impair the effectiveness of neutralising antibodies, including K417N, N440K, G446S, E484A,  
44 Q493K, G496S, G339D, S371L, and S375F(17).  
45

46 The emergence of Omicron has been followed by a tidal wave of infections worldwide.  
47 Early data from South Africa demonstrated that the proportion of COVID-19 cases caused by  
48 the Omicron variant rose from 3% in early October, to 98% by early December(137). In late  
49  
50  
51  
52  
53  
54  
55  
56  
57  
58  
59  
60

1  
2  
3 December 2021, meanwhile, the doubling time for number of positive Omicron cases was  
4 between two and three in the UK, US, and much of Europe(138, 139), highlighting the  
5 transmissibility of this variant. The mutations harboured by Omicron that enhance its binding  
6 affinity(135, 136) and ability to escape neutralising antibodies(17) likely drove its rapid spread,  
7 as did its fast replication rate, which is around 70 times faster than the Delta and primary  
8 strains(140). The reinfection rate of Omicron has also been found to be significantly higher  
9 than that of previous variants in studies from Scotland(141) and South Africa(142).  
10  
11

12 The Omicron variant has extensive but incomplete escape from naturally acquired and  
13 vaccine-induced immunity(143, 144). Compared to the Delta variant, Omicron requires around  
14 a ten-fold increased antibody titre to be neutralised, following vaccination with either Oxford-  
15 AstraZeneca or Pfizer/BioNtech vaccines(145). Indeed, blood sera from individuals who had  
16 received two doses of the Pfizer/BioNtech vaccine exhibited more than a 25-fold reduction in  
17 neutralising antibody titres against the Omicron variant compared to the primary strain(146).  
18 T-cell responses to Omicron may remain intact, however. One preprint study demonstrated that  
19 70-80% of the T-cell response targeting the S protein was maintained in those vaccinated or  
20 with prior infection, while the magnitude of Omicron cross-reactive T-cells was like that of  
21 both Delta and Beta variants(147). Furthermore, data from Pfizer/BioNtech revealed that 80%  
22 of the epitopes in the Omicron variant S protein that are recognised by CD8+ T-cells were not  
23 affected by this variant's mutations, following two-doses of the vaccine(146). T-cell responses  
24 induced from vaccine administration or prior infection may, therefore, provide some protection  
25 from severe disease.  
26  
27  
28  
29

30 Recent real-world evidence has implied that Omicron infection is milder in severity  
31 than previous variants. In an early South African analysis, the risk of hospitalisation (aOR=0.2)  
32 was lower for Omicron infections compared to non-Omicron SARS-CoV-2 infections(137)  
33 while, compared to earlier infections associated with the Delta variant, Omicron-infected  
34 individuals had a lower risk of severe disease (aOR=0.3)(137). In December 2021 in England,  
35 Omicron cases were found to induce a significantly reduced risk of hospitalisation or  
36 presentation for emergency care in comparison to Delta cases(74, 75). The decreased disease  
37 severity inflicted by Omicron may be due to its reduced capacity for replication in lung tissue,  
38 which was found to be more than ten times less in lung tissue compared to Delta(140).  
39 Concordantly, the S protein of the Omicron variant is less efficient at cleaving the ACE2  
40 receptor and entering cells of lung organoids(145), while is also less able to cause fusion  
41 between lung cells compared to Delta(145), which is often observed in cases of severe COVID-  
42 19. The reduction in replication within the lungs, and the preservation of T-cell responses likely  
43 contribute to the milder disease exerted by the Omicron variant.  
44  
45  
46  
47

48 Although the Omicron variant appears to manifest in mild disease, high case numbers  
49 may still result in many hospitalisations and deaths in those vulnerable to the virus. Omicron  
50 case numbers may be beginning to peak, however. In South Africa, a 29.7% decrease in weekly  
51 COVID-19 cases were reported in the week ending 25<sup>th</sup> December 2021, compared to the  
52 previous week, and the Omicron wave is said to have passed(148). Concerningly, global case  
53 numbers continue to rise rapidly(149) and many countries will continue to feel the pressure  
54 exerted by the wave of Omicron infections.  
55  
56  
57  
58

## 59 Variants of interest

60

### ***Lambda***

The Lambda variant, of the C.37 lineage, was first documented in Peru in December 2020 and was designated as a VOI on 14<sup>th</sup> June 2021(3). This variant contains the S protein mutations; D614G, L452Q, and F490S(104). The L452Q mutation, located within the RBD, enhances binding affinity to the ACE2 receptor and increases the infectivity of Lambda(150), while, together L452Q and F490S increase the resistance of this variant to vaccine-elicited antibody neutralisation(150). Furthermore, F490S was identified as being a high-risk mutation for enhancing abilities to escape neutralisation(150).

Infectivity of the Lambda variant may be higher than that of Alpha, Gamma, and other D614G containing variants(151), suggesting that Lambda could potentially spread more rapidly and effectively. Additionally, compared to the primary SARS-CoV-2 virus, antibody neutralisation was found to be decreased by 3.05-fold for the Lambda variant, higher than that for Gamma (2.33-fold) and Alpha (2.03-fold) variants(151). However, findings suggest that the Lambda variant can be neutralised by monoclonal antibodies and current vaccines are protective against this variant(150).

### ***Mu***

The Mu variant, from the B.1.621 lineage, was first documented in Columbia in January 2021 before receiving designation as a VOI on 30<sup>th</sup> August 2021(3). This variant contains the aforementioned S protein mutations E484K, N501Y, D614G, and P681H(104). Mu also contains the S protein mutation R346K, located within the RBD(104, 152), which may induce large binding free energy changes that disrupt the binding of antibodies to the S protein and enhance the ability of the variant to escape neutralisation(153). As discussed, the E484K, N501Y, D614G, and P681H mutations have been shown to increase transmissibility(80, 85, 87, 105, 109, 112, 120, 121) and neutralisation escape(91, 106) suggesting that the Mu SARS-CoV-2 variant is likely to be more infectious than the primary strain.

Although the Lambda and Mu variants have been outcompeted by Delta and now Omicron, the development and spread of VOIs will need to be closely monitored and studied to appreciate their pathogenicity, transmissibility, and virulence.

### **VUM**

As of 25<sup>th</sup> January 2022, there are three VUM listed by the WHO(3) (*table 1*).

### **Vaccinations**

The COVID-19 pandemic prompted a rapid international search for safe and effective vaccines against the SARS-CoV-2 virus. In line with previous vaccine development, including for both SARS-CoV and MERS-CoV, the S protein was a key target for COVID-19 vaccine development(154). As of 24<sup>th</sup> January 2022, 33 approved vaccines are in use in 197 countries, with ten vaccines having gained emergency use listing approval from the WHO(4), (*table 2*). As of 25<sup>th</sup> January 2022 there are 194 vaccines in pre-clinical development and 140 in clinical development(155). Numerous studies have explored the effectiveness of approved vaccines, however, large variations in vaccine effectiveness are reported. This variability is likely due to several factors in the studies including, the country, date, and population size of the study, as

well as the SARS-CoV-2 variants circulating during the study period. These factors, along with how the effectiveness is reported, mean that it is difficult to compare vaccines and fully understand how effective each vaccine is. Here, we review the COVID-19 vaccines in use around the world.

### ***Pfizer/BioNtech - BNT162b2***

The BNT162b2 vaccine (Comirnaty) is a lipid nanoparticle-formulated, nucleoside-modified mRNA vaccine encoding a modified SARS-CoV-2 S protein which was developed through a collaborative effort between Pfizer (New York, US) and BioNTech (Mainz, Germany)(156, 157). BNT162b2 gained WHO emergency use listing on 31<sup>st</sup> December 2020(158) and, as of 24<sup>th</sup> January 2022, has been approved for use in 136 countries(4).

Following administration of BNT162b2, a Th1-biased response is observed, with tumour necrosis factor alpha (TNF $\alpha$ ), interferon gamma (IFN $\gamma$ ), and interleukin-2 (IL-2) all elevated following vaccination, compared to placebo(159, 160). Highest neutralisation titres are found between seven and fourteen days following the second dose(161), while those previously infected with COVID-19 showed a four-fold increase in antibody binding and a 18-fold increase in neutralisation titres compared to previously uninfected individuals following two-doses(162). The BNT162b vaccine is well tolerated, with limited reactogenicity. Redness and swelling at injection site have been reported, however mild or moderate pain at the injection site is the most commonly reported reaction to vaccination(161). Fatigue, muscle pain, headache and chills are other commonly reported symptoms following BNT162b2 administration(163). The rate of systemic reactions after a second dose of BNT162b has been found to be 1.7 to 2 times higher than after a first dose, possibly suggesting an immunity-boosting effect(164). Many safety reports of this vaccine describe no serious adverse events(161, 164, 165), however, a large study found that BNT162b2 was associated with an increased risk of myocarditis, lymphadenopathy, appendicitis, and herpes zoster infection(166). Although rare, allergic reaction or anaphylaxis has also been reported following administration of the BNT162b2 vaccine(163). **Table 2** outlines clinical trial and real-world data for vaccine effectiveness.

### ***Oxford-AstraZeneca – AZD1222***

The AZD1222 vaccine (Vaxzevria) is a non-replicating vector of the chimpanzee adenovirus ChAdOx1, modified to encode the SARS-CoV-2 S protein(167). Developed through collaboration between the University of Oxford and AstraZeneca (Cambridge, UK), this vaccine was given WHO emergency use listing on 16<sup>th</sup> February 2021(158) and has been approved for use in 137 countries, as of 24<sup>th</sup> January 2022(4). The WHO has granted emergency use listing to two versions of this vaccine (AZD1222 and Covishield) in order to utilise Covishield as part of their worldwide COVAX initiative, which is being produced by the Serum Institute of India and AstraZeneca-SKBio (Republic of Korea)(168).

Following administration of AZD1222, significant antibody production, predominantly of IgG1 and IgG3 subclasses, and a Th-1 cell response, with increased expression of IFN $\gamma$  and TNF $\alpha$ , is seen(122, 169). One dose of AZD1222 has been shown to produce a neutralising antibody response in 91% of participants, while a second dose resulted in 100% of participants producing neutralising antibodies(170). Mild and moderate itch, pain, redness, swelling,

1  
2  
3 tenderness, and warmth are common local reactions, while chills, fatigue, fever, headache,  
4 muscle ache, and nausea are commonly reported systemic reactions following AZD1222  
5 administration(170). Rare symptoms, including severe chest pain, nasal bleeding, and allergic  
6 reaction have been reported following AZD1222 administration(171). **Table 2** outlines clinical  
7 trial and real-world data for vaccine effectiveness.  
8  
9

### 10 11 ***Johnson & Johnson - Ad26.COV.2.S***

12 The Ad26.COV.2.S vaccine is a non-replicating adenovirus vector, modified to contain  
13 the SARS-CoV-2 S protein in a prefusion-stabilised conformation and requires a single  
14 dose(172). This vector was developed from the recombinant human adenovirus type 26 by the  
15 Janssen pharmaceutical company of Johnson & Johnson (New Brunswick, New Jersey,  
16 US)(172) and was listed for WHO emergency use listing on 12<sup>th</sup> March 2021(158). As of 24<sup>th</sup>  
17 January 2022, Ad26.COV.2.S has been approved for use in 106 countries(4).  
18  
19

20 The Ad26.COV.2.S vaccine induces the production of a variety of antibody subclasses,  
21 such as IgG, IgM, and IgA, and promotes several non-neutralising antibody responses,  
22 including activation of CD4+ and CD8+ Th1-cells and production of IFN $\gamma$ , IL-2, and  
23 TNF $\alpha$ (173, 174). Although neutralising antibody responses induced by Ad26.COV.2.S are  
24 reduced against SARS-CoV-2 variants, non-neutralising antibody and T-cell responses have  
25 been found to be preserved against VOC(173), while a prior COVID-19 infection significantly  
26 increases levels of S protein-binding antibodies, antibody-dependent cellular cytotoxicity, and  
27 neutralising antibodies against VOCs including Beta and Delta(175). Ad26.COV.2.S is safe  
28 and well tolerated, with a large clinical trial demonstrating that headache, fatigue, and myalgia,  
29 are the most common systemic reactions, while injection-site pain is the most common local  
30 reaction following administration(172). Like other vaccines, Ad26.COV.2.S has been  
31 associated with serious adverse events, such as allergic reactions and cerebral venous sinus  
32 thrombosis, however, these are rare(163, 176). **Table 2** outlines clinical trial and real-world  
33 data for vaccine effectiveness.  
34  
35  
36  
37  
38  
39

### 40 41 ***Moderna – mRNA-1273***

42 The mRNA-1273 vaccine (Spikevax) developed by Moderna (Massachusetts, US) is a  
43 lipid-nanoparticle-encapsulated mRNA vaccine expressing the SARS-CoV-2 S protein that has  
44 been prefusion-stabilised(177). This vaccine gained WHO emergency use listing on 30<sup>th</sup> April  
45 2021(158), and as of 24<sup>th</sup> January 2022, has been approved for use in 85 countries(4).  
46

47 The mRNA-1273 vaccine elicits a strong CD4+ Th-1 cell response, with TNF $\alpha$ , IFN $\gamma$ ,  
48 and IL-2 expression increased following administration(178-180), while neutralising antibody  
49 titres have been shown to significantly increase up until around 28 days following the second  
50 dose of the vaccine, and afterwards remain consistently high(181). Fatigue, muscle pain,  
51 headache, chills, joint pain, and injection-site pain/reaction are common adverse effects caused  
52 by the mRNA-1273 vaccine(163, 177), while serious adverse effects are often avoided(177,  
53 181). Serious adverse events, including allergic reaction and anaphylaxis are rare, but not  
54 inconceivable following mRNA-1273 administration(163). **Table 2** outlines clinical trial and  
55 real-world data for vaccine effectiveness.  
56  
57  
58  
59

### 60 ***Other WHO emergency use listed COVID-19 vaccines***



1  
2  
3  
4  
5  
6  
7  
8  
9  
10  
11  
12  
13  
14  
15  
16  
17  
18  
19  
20  
21  
22  
23  
24  
25  
26  
27  
28  
29  
30  
31  
32  
33  
34  
35  
36  
37  
38  
39  
40  
41  
42  
43  
44  
45  
46  
47  
48  
49  
50  
51  
52  
53  
54  
55  
56  
57  
58  
59  
60

In addition to the five COVID-19 vaccines described previously, five other vaccines have gained emergency use listing by the WHO. First, the Sinopharm BBIBP-CorV COVID-19 vaccine (Covilo) was developed by the Beijing Bio-Institute of Biological Products, a subsidiary of China National Biotec Group, and was given WHO emergency use listing on 7<sup>th</sup> May 2021(158). This vaccine is a 19nCoV-CDC-Tan-HB02 strain SARS-CoV-2 antigen that is produced in Vero cells, inactivated by  $\beta$ -propiolactone, and then purified and absorbed with aluminium hydroxide(182). Next, the CoronaVac vaccine, developed by Sinovac Biotech (Beijing, China), was listed for WHO emergency use on 1<sup>st</sup> June 2021(158). Like the BBIBP-CorV vaccine, this vaccine is a Vero cell-based, aluminium hydroxide-adjuvanted,  $\beta$ -propiolactone-inactivated vaccine, however, it is based on the SARS-CoV-2 CZ02 strain(183). Covaxin (BBV152) is a whole virion inactivated SARS-CoV-2 vaccine formula developed by Bharat Biotech International Ltd (India)(184) which gained emergency use listing from the WHO On 3<sup>rd</sup> November 2021(185). Lastly, Covovax and its originator, Nuvaxovid (NVX-CoV2372), were both developed by Novavax (Maryland, United States) and the Coalition for Epidemic Preparedness Innovations (Oslo, Norway), and gained emergency use listing on 17<sup>st</sup> and 21<sup>th</sup> December 2021, respectively(186, 187). Both vaccines are manufactured using the same technology, and consist of a recombinant SARS-CoV-2 S protein nanoparticle administered with the adjuvant Matrix-M as a co-formulation(188). These vaccines produce similar immune responses to those already discussed. Studies assessing the efficacy of these vaccines are outlined in *table 2*.

### ***Other approved vaccines***

In addition to the vaccines that have received emergency use listing from the WHO, around the world, vaccines have been developed, tested, and approved to combat COVID-19. As of 24<sup>th</sup> January 2022, 33 vaccines, including the ten described above, have been approved in at least one country(4). The remaining 23 approved vaccines are outlined in *table 3*.

### ***Waning immunity and boosters***

Throughout the COVID-19 pandemic, emerging variants have threatened the effectiveness of vaccines (*table 2*). Simultaneously, waning immunity following vaccination questions how long vaccines remain effective and highlights the importance of booster doses. Indeed, protection against SARS-CoV-2 following vaccination decreases over time, both in terms of antibody titres(189-191) and vaccine effectiveness(192-195). However, cellular responses, such as T-cell immunity, may persist for longer periods (196, 197). With a gradual loss of protection from SARS-CoV-2 following COVID-19 vaccination, many countries are now rolling out booster programmes with the aim of raising levels of immunity.

Since booster programmes began, evidence that a booster vaccine dose enhances antibody and cellular responses has accumulated. Following a third dose of vaccine, neutralising antibody titres increase significantly(198-201) and, in some cases, to higher levels than after the primary two doses(198). Additionally, boosters have also been found to increase neutralising antibody titres against Beta, Gamma, Delta, and Omicron variants(199, 202, 203). T-cell response is also enhanced following a third dose(200, 204, 205). Together, enhancing neutralising antibody and cellular responses with a booster vaccine dose is likely to provide a greater level of protection than relying on immunity built through a primary regimen.

1  
2  
3 The antibody and cellular responses observed following booster vaccinations have been  
4 found to correlate with increased levels of protection against SAR-CoV-2 infection and severe  
5 illness. On 30<sup>th</sup> July 2021, Israel was the first country to offer a third dose of BNT162b2 to  
6 certain groups. Subsequently, several studies have revealed that those who received a third  
7 vaccine dose were significantly less likely to be infected or have severe disease with SARS-  
8 CoV-2 compared to those who received two-doses(206-209). In those aged 60 or older, an  
9 observational study demonstrated that the rate of severe COVID-19 and death was lower in the  
10 boosted group by a factor of 17.9 and 14.7, respectively, compared to the non-boosted  
11 group(210). Booster doses of COVID-19 vaccine have been shown to be effective against  
12 infection with Delta(211, 212) and, to a lesser degree, Omicron variants(75, 145, 146, 212-  
13 214) despite the numerous mutations harboured by these variants. Overall, increasing evidence  
14 is pointing towards the benefits of booster doses of COVID-19 vaccines, therefore it is expected  
15 that booster programmes will continue to roll out across the globe. Based on current evidence,  
16 the CDC recommend that the time interval for receiving a booster following the primary  
17 regimen is five months for Pfizer/BioNTech BNT162b2 primary regimen, six months for  
18 Moderna mRNA-1273 primary regimen, and two months for Johnson & Johnson  
19 Ad26.COV2.S primary regimen(215). As the pandemic progresses and new variants emerge,  
20 variant-specific vaccines may require development, with pre-clinical studies demonstrating  
21 their efficacy(216) and pharmaceutical companies, such as Pfizer, advancing in variant-specific  
22 vaccine development(146). Policy makers should also consider when vaccine boosters will be  
23 given in the future and who will receive booster doses in the long-term.

### 31 32 **Emerging Treatments**

33 As more is learnt about the virus, the therapeutic strategy against COVID-19 develops.  
34 There are currently over two thousand ongoing trials assessing certain treatment strategies for  
35 COVID-19(217). Recently, antivirals including molnupiravir (Lagevrio) and  
36 nirmatrelvir/ritonavir (Paxlovid) have been approved in the UK(218, 219), US(220, 221), and  
37 Europe(222, 223) for treating COVID-19 in certain risk groups. Similarly, sotrovimab  
38 (Xevudy), a monoclonal antibody treatment, has recently been approved for use in treating  
39 certain COVID-19 patients in the UK(224), US(225), and Europe(226). These drugs have been  
40 shown to be effective at preventing poor clinical outcomes, including death, in those vulnerable  
41 to severe COVID-19 infection. Other drug treatments, such as janus kinase inhibitors,  
42 corticosteroids, and anti-inflammatories have contrasting evidence to support their use, and  
43 therefore, the use of specific drugs is either recommended for or against by certain treatment  
44 and management guidelines, which are discussed below.

### 50 51 **Guidelines**

52 The treatment and management of COVID-19 is a continually evolving topic, however,  
53 health authorities have published and continue to update guidelines and recommendations for  
54 treating COVID-19. The WHO living guideline on COVID-19 and therapeutics is regularly  
55 updated, with the latest version, published on 14<sup>th</sup> January 2022 containing 14  
56 recommendations on COVID-19 treatment(227). In the UK, the National Institute for Health  
57 and Care Excellence (NICE)(228) and Medicines and Healthcare products Regulatory Agency  
58 (MHRA)(229) provide updated guidelines on COVID-19 treatment, while in Europe, the  
59  
60

1  
2  
3 ECDC regularly publishes several guidelines providing recommendations on a range of  
4 COVID-19 related topics(230). In the US, the National Institutes of Health (NIH)(231) and the  
5 CDC(232) provide guidance on COVID-19 treatment and management, with the CDC  
6 supplying guidelines for specific groups including, employers, schools, health departments,  
7 and governments.  
8  
9

### 10 11 **Considerations for the future**

12 Novel infectious diseases and pandemics are an unpredictable but inevitable aspect of  
13 nature and it is, therefore, important that we learn from past pandemics to prepare for future  
14 ones. Firstly, the COVID-19 pandemic has highlighted and amplified the existing inequalities  
15 within society(233), with non-white ethnicity, social disadvantage, and unemployment all risk  
16 factors for testing positive for COVID-19(234) and those most economically deprived found  
17 to be particularly vulnerable(235). These inequalities require addressing to be better prepared  
18 for similar situations in the future.  
19

20  
21 Next, to progress through a pandemic we should be racing the pathogen, not each other.  
22 This statement becomes apparent when you consider the problems countries faced when  
23 seeking out PPE(236), and the vaccine inequity seen around the world(237), with developed  
24 countries often better placed to be able to purchase these items. Initiatives such as the WHO's  
25 COVAX programme are vital to protect those most vulnerable and reduce the global spread of  
26 disease. In October 2021, the UK government released a publication outlining where the  
27 policies implemented to reduce the impact of the COVID-19 pandemic failed, and the lessons  
28 learned from these failures (238). Here, there is room for improvement, with the publication  
29 presenting conclusions and recommendations on how to enhance pandemic preparedness,  
30 lockdown and social distancing measures, testing and contact tracing, social care, and vaccines.  
31 In countries such as the UK, US, and much of Europe, where the COVID-19 death rate has  
32 been high, steps need to be taken and lessons need to be learnt in order to be better prepared  
33 for the next pandemic. The responsibility of improving pandemic response lies with policy  
34 makers, the medical/scientific community, and the public, and will ultimately require a  
35 collaborative approach.  
36  
37

38  
39 However, certain aspects of the response to the COVID-19 pandemic have been a  
40 triumph. One of the major victories was the rapid development and rollout of vaccines(239),  
41 which continue to be effective. The rollout of rapid testing and quarantine for positive cases  
42 was also important to at least disrupt the spread of the virus, especially given that asymptomatic  
43 individuals can contribute to the spread. Furthermore, the swift identification and sharing of  
44 knowledge of SARS-CoV-2 variants between countries should be applauded. Lessons can be  
45 learned from countries where COVID-19 was controlled. In Taiwan, managing the pandemic  
46 as directed by pre-COVID-19 pandemic plans prompted an immediate response; screening of  
47 all airline passengers arriving from Wuhan and high risk areas, restricting entry for non-  
48 Taiwanese citizens, 14-day quarantine period for contacts of confirmed cases or returning  
49 travellers, a ban on large gatherings, and widespread mask wearing were some of the quickly  
50 implemented management strategies(240). New Zealand implemented similarly effective  
51 restrictions, with the addition of a national lockdown(240). Many of the pandemic control  
52 components that kept case and death numbers low in Taiwan and New Zealand could be  
53 adopted by other countries in the future and may lead to greater outcomes in terms of protecting  
54  
55  
56  
57  
58  
59  
60

1  
2  
3 both health of individuals and the health and wellbeing of the country. Overall, there is much  
4 to be learnt from the COVID-19 pandemic and, as we emerge from it, inspection of which  
5 policies failed, and which succeeded are imperative.  
6  
7

### 8 **Conclusion**

9  
10 COVID-19 remains prevalent and life-threatening. Although rollout of vaccines has  
11 been successful as attaining a high global vaccination coverage and ensuring that all healthcare  
12 systems have the capacity to cope with seasonal waves are essential. With Omicron highly  
13 prevalent, we must continue to learn, develop therapeutics, and remain vigilant to new VOCs.  
14 Here, we have provided an overview of the virology of SARS-CoV-2, including the mutations  
15 harboured by variants of the virus and how these mutations effect its transmissibility and  
16 virulence. Lastly, we discussed the vaccines that have been developed and administered around  
17 the world and provided evidence supporting the rollout of booster doses. Future priorities  
18 should focus on continuing vaccination programmes and developing variant-specific vaccines  
19 as new mutations emerge. This, along with the expansion of our knowledge of SARS-CoV-2  
20 and which therapies are most successful to treat infections with it will ultimately lead to  
21 favourable outcomes moving forward.  
22  
23  
24  
25  
26

### 27 **Research Questions**

- 28 1) How will the SARS-CoV-2 virus mutate in the future, and which mutations will give a  
29 competitive advantage that will allow the virus to inflict disease to many people?
- 30 2) How do we keep up with the rapidly changing SARS-CoV-2 environment and ensure  
31 that vaccines remain effective?
- 32 3) How do we manage the booster programme and when will future booster vaccinations  
33 be required in order to maintain high levels of immunity?
- 34 4) How can we learn from the current and past pandemics so that we are better prepared  
35 for the next one?  
36  
37  
38  
39

40 **Patient Involvement:** Patients who had been infected with covid-19 were contacted and  
41 requested to review the initial drafts of this manuscript. The received feedback was mostly  
42 positive and assisted in developing and focusing our review. Final drafts were also reviewed  
43 by patients who had had covid-19 and similar positive feedback was received.  
44  
45

46 **Contributorship statement and guarantor:** MY and HC performed the literature search  
47 and drafted the manuscript. HC revised and finalised the manuscript. JS reviewed and revised  
48 the manuscript. PE was responsible for the concept and design of the work. PE reviewed,  
49 revised, and finalised the manuscript. PE is the guarantor.  
50  
51  
52

53 **Competing interests:** We have read and understood the BMJ policy on declaration of interests  
54 and declare the following interests: PE was funded by the Medical Research Council and now  
55 by Higher Education Funding Council for England (HEFCE). He has also received grants from  
56 Alzheimer's Research, UK, Alzheimer's Drug Discovery Foundation, Alzheimer's Society,  
57 UK, Medical Research Council, Alzheimer's Association US, Van-Geest foundation, and  
58 European Union grants. PE is a consultant to Roche, Pfizer, and Novo Nordisk. He has received  
59  
60

educational and research grants from GE Healthcare, Novo Nordisk, Piramal Life Science/Life Molecular Imaging, Avid Radiopharmaceuticals and Eli Lilly. He is a member of the Scientific Advisory Board at Novo Nordisk. None of these were related to COVID-19

**Copyright statement:** The Corresponding Author has the right to grant on behalf of all authors and does grant on behalf of all authors, an exclusive licence (or non-exclusive for government employees) on a worldwide basis to the BMJ Publishing Group Ltd to permit this article (if accepted) to be published in BMJ editions and any other BMJ PGL products and sub-licenses such use and exploit all subsidiary rights, as set out in our licence (bmj.com/advice/copyright.shtml).”

### **Figure Legends:**

**Figure 1: Genome and structure of SARS-CoV-2. A) SARS-CoV-2 genome and S protein amino acid composition.** The SARS-CoV-2 genome is approximately 30,000 base pairs (bp) long and consists of open reading frames (ORF) and elements that are essential for the virus’ structure. The spike S protein is responsible for binding and entry into host cells. SARS-CoV-2 variants of concern (VOC) contain various S protein non-synonymous mutations that result in amino acid changes in the receptor binding domain (orange text) and the S1/S2 subunit interface (black text) which have been demonstrated to enhance transmissibility of the virus. VOC include Alpha ( $\alpha$ ), Beta ( $\beta$ ), Gamma ( $\gamma$ ), and Delta ( $\delta$ ). **B) SARS-CoV-2 structure.** SARS-CoV-2 is a RNA virus that has a crown-like appearance and contains four major structural proteins: nucleocapsid (N), spike (S), envelope (E), and membrane (M). **C) S and ACE2 interaction.** The SARS-CoV-2 S protein directly interacts with human angiotensin-converting enzyme 2 (ACE2) receptors in order to gain entry into host cells. The receptor binding domain (RBD) of the S protein tightly binds to ACE2. **D) Spike protein structure.** The S protein protrudes out from the main SARS-CoV-2 bulk and is comprised of two subunits: S1 and S2. S1 contains the RBD which directly interacts with the human ACE2 receptor, while the S1/S2 interface contains a furin cleavage site which is cleaved to allow S2 to fuse with the host cell membrane. Both the RBD and the S1/S2 interface contain transmissibility increasing mutations that are harboured in variants of concern.

**Figure 2: Viral entry and host response. A) At the alveolar epithelial cell layer.** Epithelial cells in the lungs express both angiotensin-converting enzyme 2 (ACE2) receptors and transmembrane protease serine 2 (TMPRSS2), allowing for infection by SARS-CoV-2. Replication of the virus within these cells induces an intense immune response that attracts monocytes, T-cells and macrophages and, in some cases, can result in a cytokine storm. **B) Within nearby blood vessels.** Cytokines produced by the epithelial cell layer are released into blood vessels supplying the infected tissue, which causes the recruitment of further immune cells to the area, driving the damaging inflammatory response further. Circulating cytokines also create a systemic inflammatory environment. **C) Adaptive immune response.** Circulating lymphocytes carry viral antigens to lymph nodes and bone marrow to begin the adaptive immune system processes whereby B-cells, and later antibodies, are activated. **D) SARS-CoV2 host replication.** The SARS-CoV-2 virus utilises the ACE2 receptor and TMPRSS2 to gain entry into human cells. Following release of the viral RNA within the host cell, the virus utilises the host endoplasmic reticulum (ER) and Golgi apparatus to produce

and manufacture new viral particles, which are released out of the cell to infect other cells and new hosts.

**Table 1: SARS-CoV-2 variants and their S protein mutations.** \*first detection worldwide. Information correct as of 24<sup>th</sup> January 2022.

**Table 2: Vaccine effectiveness of vaccines that have gained WHO emergency use listing.** \*Adjusted for covariates when reported by study, dates are reported in dd/mm/yyyy format. Vaccine effectiveness days/months refers to days/months since vaccination dose. Information correct as of reported conclusion date of each study.

**Table 3: COVID-19 vaccines approved in at least one country.** Information correct as of 24<sup>th</sup> January 2022.

## References

1. CDC.org [Internet]. Human Coronavirus Types. Centres for Disease Control and Prevention. [15 February 2020; cited 12 October 2021]. Available from: <https://www.cdc.gov/coronavirus/types.html>
2. Who.int [Internet]. Weekly operational update on COVID-19 - 25 January 2022. World Health Organisation. [25 January 2022; cited 26 January 2022]. Available from: <https://www.who.int/publications/m/item/weekly-operational-update-on-covid-19---25-january-2022>
3. Who.int [Internet]. Tracking SARS-CoV-2 variants. World Health Organisation. [25 January 2022; cited 26 January 2022]. Available from: <https://www.who.int/en/activities/tracking-SARS-CoV-2-variants/>
4. covid19.trackvaccines.org [Internet]. COVID-19 Vaccine Tracker. [24 January 2022; cited 26 January 2022]. Available from: <https://covid19.trackvaccines.org/>
5. Chan JF, Yuan S, Kok KH, To KK, Chu H, Yang J, et al. A familial cluster of pneumonia associated with the 2019 novel coronavirus indicating person-to-person transmission: a study of a family cluster. *Lancet*. 2020;395(10223):514-23.
6. Who.int [Internet]. Transmission of SARS-CoV-2: implications for infection prevention precautions - Scientific Brief. World Health Organisation. [9 July 2020; cited 28 October 2021]. Available from: <https://www.who.int/news-room/commentaries/detail/transmission-of-sars-cov-2-implications-for-infection-prevention-precautions>
7. Gidari A, Sabbatini S, Bastianelli S, Pierucci S, Busti C, Bartolini D, et al. SARS-CoV-2 Survival on Surfaces and the Effect of UV-C Light. *Viruses*. 2021;13(3).
8. Pottage T, Garratt I, Onianwa O, Spencer A, Paton S, Verlander NQ, et al. A comparison of persistence of SARS-CoV-2 variants on stainless steel. *J Hosp Infect*. 2021;114:163-6.
9. Guo L, Wang M, Zhang L, Mao N, An C, Xu L, et al. Transmission risk of viruses in large mucosal droplets on the surface of objects: A time-based analysis. *Infect Dis Now*. 2021;51(3):219-27.
10. Carraturo F, Del Giudice C, Morelli M, Cerullo V, Libralato G, Galdiero E, et al. Persistence of SARS-CoV-2 in the environment and COVID-19 transmission risk from environmental matrices and surfaces. *Environ Pollut*. 2020;265(Pt B):115010.

11. Hui KP, Cheung M-C, Perera RA, Ng K-C, Bui CH, Ho JC, et al. Tropism, replication competence, and innate immune responses of the coronavirus SARS-CoV-2 in human respiratory tract and conjunctiva: an analysis in ex-vivo and in-vitro cultures. *The Lancet Respiratory Medicine*. 2020;8(7):687-95.
12. McAloon C, Collins A, Hunt K, Barber A, Byrne AW, Butler F, et al. Incubation period of COVID-19: a rapid systematic review and meta-analysis of observational research. *BMJ Open*. 2020;10(8):e039652.
13. Bliddal S, Banasik K, Pedersen OB, Nissen J, Cantwell L, Schwinn M, et al. Acute and persistent symptoms in non-hospitalized PCR-confirmed COVID-19 patients. *Sci Rep*. 2021;11(1):13153.
14. Grant MC, Geoghegan L, Arbyn M, Mohammed Z, McGuinness L, Clarke EL, et al. The prevalence of symptoms in 24,410 adults infected by the novel coronavirus (SARS-CoV-2; COVID-19): A systematic review and meta-analysis of 148 studies from 9 countries. *PLoS One*. 2020;15(6):e0234765.
15. Kronbichler A, Kresse D, Yoon S, Lee KH, Effenberger M, Shin JI. Asymptomatic patients as a source of COVID-19 infections: A systematic review and meta-analysis. *Int J Infect Dis*. 2020;98:180-6.
16. Arons MM, Hatfield KM, Reddy SC, Kimball A, James A, Jacobs JR, et al. Presymptomatic SARS-CoV-2 Infections and Transmission in a Skilled Nursing Facility. *N Engl J Med*. 2020;382(22):2081-90.
17. Cao Y, Wang J, Jian F, Xiao T, Song W, Yisimayi A, et al. B.1.1.529 escapes the majority of SARS-CoV-2 neutralizing antibodies of diverse epitopes. *BioRxiv* [Preprint]. 2021.
18. Wolff D, Nee S, Hickey NS, Marschollek M. Risk factors for Covid-19 severity and fatality: a structured literature review. *Infection*. 2021;49(1):15-28.
19. Zhou F, Yu T, Du R, Fan G, Liu Y, Liu Z, et al. Clinical course and risk factors for mortality of adult inpatients with COVID-19 in Wuhan, China: a retrospective cohort study. *Lancet*. 2020;395(10229):1054-62.
20. Zhang J, Wang X, Jia X, Li J, Hu K, Chen G, et al. Risk factors for disease severity, unimprovement, and mortality in COVID-19 patients in Wuhan, China. *Clin Microbiol Infect*. 2020;26(6):767-72.
21. Ebinger JE, Achamallah N, Ji H, Claggett BL, Sun N, Botting P, et al. Pre-existing traits associated with Covid-19 illness severity. *PLoS One*. 2020;15(7):e0236240.
22. Williamson EJ, Walker AJ, Bhaskaran K, Bacon S, Bates C, Morton CE, et al. Factors associated with COVID-19-related death using OpenSAFELY. *Nature*. 2020;584(7821):430-6.
23. Li R, Tian J, Yang F, Lv L, Yu J, Sun G, et al. Clinical characteristics of 225 patients with COVID-19 in a tertiary Hospital near Wuhan, China. *J Clin Virol*. 2020;127:104363.
24. Guo L, Shi Z, Zhang Y, Wang C, Do Vale Moreira NC, Zuo H, et al. Comorbid diabetes and the risk of disease severity or death among 8807 COVID-19 patients in China: A meta-analysis. *Diabetes Res Clin Pract*. 2020;166:108346.
25. Feng Y, Ling Y, Bai T, Xie Y, Huang J, Li J, et al. COVID-19 with Different Severities: A Multicenter Study of Clinical Features. *Am J Respir Crit Care Med*. 2020;201(11):1380-8.

- 1
  - 2
  - 3
  - 4
  - 5
  - 6
  - 7
  - 8
  - 9
  - 10
  - 11
  - 12
  - 13
  - 14
  - 15
  - 16
  - 17
  - 18
  - 19
  - 20
  - 21
  - 22
  - 23
  - 24
  - 25
  - 26
  - 27
  - 28
  - 29
  - 30
  - 31
  - 32
  - 33
  - 34
  - 35
  - 36
  - 37
  - 38
  - 39
  - 40
  - 41
  - 42
  - 43
  - 44
  - 45
  - 46
  - 47
  - 48
  - 49
  - 50
  - 51
  - 52
  - 53
  - 54
  - 55
  - 56
  - 57
  - 58
  - 59
  - 60
26. Tian J, Yuan X, Xiao J, Zhong Q, Yang C, Liu B, et al. Clinical characteristics and risk factors associated with COVID-19 disease severity in patients with cancer in Wuhan, China: a multicentre, retrospective, cohort study. *Lancet Oncol.* 2020;21(7):893-903.
27. Liang W, Guan W, Chen R, Wang W, Li J, Xu K, et al. Cancer patients in SARS-CoV-2 infection: a nationwide analysis in China. *Lancet Oncol.* 2020;21(3):335-7.
28. Vizcarra P, Perez-Elias MJ, Quereda C, Moreno A, Vivancos MJ, Drona F, et al. Description of COVID-19 in HIV-infected individuals: a single-centre, prospective cohort. *Lancet HIV.* 2020;7(8):e554-e64.
29. Baillie JK, Wilson JF, Bulteel N, Hayward C, Klaric L, Porteous DJ, et al. Mapping the human genetic architecture of COVID-19. *Nature.* 2021.
30. Shelton JF, Shastri AJ, Ye C, Weldon CH, Filshtein-Somnez T, Coker D, et al. Trans-ethnic analysis reveals genetic and non-genetic associations with COVID-19 susceptibility and severity. *MedRxiv [Preprint].* 2020.
31. Ellinghaus D, Degenhardt F, Bujanda L, Buti M, Albillos A, Invernizzi P, et al. Genomewide association study of severe covid-19 with respiratory failure/[...]. *New England Journal of Medicine Boston: Massachusetts Medical Society,* 2020, vol 383, no 16. 2020.
32. Hoffmann M, Kleine-Weber H, Schroeder S, Krüger N, Herrler T, Erichsen S, et al. SARS-CoV-2 cell entry depends on ACE2 and TMPRSS2 and is blocked by a clinically proven protease inhibitor. *cell.* 2020;181(2):271-80. e8.
33. Hou Y, Zhao J, Martin W, Kallianpur A, Chung MK, Jehi L, et al. New insights into genetic susceptibility of COVID-19: an ACE2 and TMPRSS2 polymorphism analysis. *BMC medicine.* 2020;18(1):1-8.
34. Barbry P, Muus C, Luecken M, Eraslan G, Waghay A, Heimberg G, et al. Integrated analyses of single-cell atlases reveal age, gender, and smoking status associations with cell type-specific expression of mediators of SARS-CoV-2 viral entry and highlights inflammatory programs in putative target cells. *BioRxiv [Preprint].* 2020.
35. Prakrithi P, Lakra P, Sundar D, Kapoor M, Mukerji M, Gupta I, et al. Genetic Risk Prediction of COVID-19 Susceptibility and Severity in the Indian Population. *Front Genet.* 2021;12:714185.
36. Huang QM, Zhang PD, Li ZH, Zhou JM, Liu D, Zhang XR, et al. Genetic Risk and Chronic Obstructive Pulmonary Disease Independently Predict the Risk of Incident Severe COVID-19. *Ann Am Thorac Soc.* 2022;19(1):58-65.
37. Zhou Y, Qian X, Liu Z, Yang H, Liu T, Chen K, et al. Coagulation factors and the incidence of COVID-19 severity: Mendelian randomization analyses and supporting evidence. *Signal Transduct Target Ther.* 2021;6(1):222.
38. Payne S. Family Coronaviridae. *Viruses* 2017. p. 149-58.
39. Masters PS, Kuo L, Ye R, Hurst KR, Koetzner CA, Hsue B. Genetic and molecular biological analysis of protein-protein interactions in coronavirus assembly. *Adv Exp Med Biol.* 2006;581:163-73.
40. Khailany RA, Safdar M, Ozaslan M. Genomic characterization of a novel SARS-CoV-2. *Gene Rep.* 2020;19:100682.
41. Thoms M, Buschauer R, Ameismeier M, Koepke L, Denk T, Hirschenberger M, et al. Structural basis for translational shutdown and immune evasion by the Nsp1 protein of SARS-CoV-2. *Science.* 2020;369(6508):1249-55.



- 1
- 2
- 3
- 4 42. Schubert K, Karousis ED, Jomaa A, Scaiola A, Echeverria B, Gurzeler LA, et al. SARS-CoV-2 Nsp1 binds the ribosomal mRNA channel to inhibit translation. *Nat Struct Mol Biol.* 2020;27(10):959-66.
- 5
- 6
- 7 43. Huang C, Lokugamage KG, Rozovics JM, Narayanan K, Semler BL, Makino S. SARS coronavirus nsp1 protein induces template-dependent endonucleolytic cleavage of mRNAs: viral mRNAs are resistant to nsp1-induced RNA cleavage. *PLoS Pathog.* 2011;7(12):e1002433.
- 8
- 9
- 10
- 11
- 12 44. Snijder EJ, Decroly E, Ziebuhr J. The Nonstructural Proteins Directing Coronavirus RNA Synthesis and Processing. *Adv Virus Res.* 2016;96:59-126.
- 13
- 14 45. V'Kovski P, Gerber M, Kelly J, Pfaender S, Ebert N, Braga Lagache S, et al. Determination of host proteins composing the microenvironment of coronavirus replicase complexes by proximity-labeling. *Elife.* 2019;8.
- 15
- 16
- 17 46. Masters PS. The molecular biology of coronaviruses. *Advances in virus research.* 2006;66:193-292.
- 18
- 19
- 20
- 21 47. Siu Y, Teoh K, Lo J, Chan C, Kien F, Escriou N, et al. The M, E, and N structural proteins of the severe acute respiratory syndrome coronavirus are required for efficient assembly, trafficking, and release of virus-like particles. *Journal of virology.* 2008;82(22):11318-30.
- 22
- 23
- 24
- 25 48. Kuo L, Masters PS. Genetic evidence for a structural interaction between the carboxy termini of the membrane and nucleocapsid proteins of mouse hepatitis virus. *J Virol.* 2002;76(10):4987-99.
- 26
- 27
- 28
- 29 49. Hulswit RJ, de Haan CA, Bosch BJ. Coronavirus Spike Protein and Tropism Changes. *Adv Virus Res.* 2016;96:29-57.
- 30
- 31
- 32 50. Konno Y, Kimura I, Uriu K, Fukushi M, Irie T, Koyanagi Y, et al. SARS-CoV-2 ORF3b Is a Potent Interferon Antagonist Whose Activity Is Increased by a Naturally Occurring Elongation Variant. *Cell Rep.* 2020;32(12):108185.
- 33
- 34
- 35 51. Kopecky-Bromberg SA, Martinez-Sobrido L, Frieman M, Baric RA, Palese P. Severe acute respiratory syndrome coronavirus open reading frame (ORF) 3b, ORF 6, and nucleocapsid proteins function as interferon antagonists. *J Virol.* 2007;81(2):548-57.
- 36
- 37
- 38 52. Xia H, Cao Z, Xie X, Zhang X, Chen JY, Wang H, et al. Evasion of Type I Interferon by SARS-CoV-2. *Cell Rep.* 2020;33(1):108234.
- 39
- 40
- 41 53. Wong HH, Fung TS, Fang S, Huang M, Le MT, Liu DX. Accessory proteins 8b and 8ab of severe acute respiratory syndrome coronavirus suppress the interferon signaling pathway by mediating ubiquitin-dependent rapid degradation of interferon regulatory factor 3. *Virology.* 2018;515:165-75.
- 42
- 43
- 44 54. Azad GK, Khan PK. Variations in Orf3a protein of SARS-CoV-2 alter its structure and function. *Biochem Biophys Rep.* 2021;26:100933.
- 45
- 46
- 47 55. Ren Y, Shu T, Wu D, Mu J, Wang C, Huang M, et al. The ORF3a protein of SARS-CoV-2 induces apoptosis in cells. *Cell Mol Immunol.* 2020;17(8):881-3.
- 48
- 49
- 50 56. Kreimendahl S, Rassow J. The Mitochondrial Outer Membrane Protein Tom70-Mediator in Protein Traffic, Membrane Contact Sites and Innate Immunity. *Int J Mol Sci.* 2020;21(19).
- 51
- 52
- 53 57. Gordon DE, Jang GM, Bouhaddou M, Xu J, Obernier K, White KM, et al. A SARS-CoV-2 protein interaction map reveals targets for drug repurposing. *Nature.* 2020;583(7816):459-68.
- 54
- 55
- 56
- 57
- 58
- 59
- 60

- 1
  - 2
  - 3
  - 4
  - 5
  - 6
  - 7
  - 8
  - 9
  - 10
  - 11
  - 12
  - 13
  - 14
  - 15
  - 16
  - 17
  - 18
  - 19
  - 20
  - 21
  - 22
  - 23
  - 24
  - 25
  - 26
  - 27
  - 28
  - 29
  - 30
  - 31
  - 32
  - 33
  - 34
  - 35
  - 36
  - 37
  - 38
  - 39
  - 40
  - 41
  - 42
  - 43
  - 44
  - 45
  - 46
  - 47
  - 48
  - 49
  - 50
  - 51
  - 52
  - 53
  - 54
  - 55
  - 56
  - 57
  - 58
  - 59
  - 60
58. Dominguez Andres A, Feng Y, Campos AR, Yin J, Yang CC, James B, et al. SARS-CoV-2 ORF9c Is a Membrane-Associated Protein that Suppresses Antiviral Responses in Cells. *BioRxiv* [Preprint]. 2020.
59. Redondo N, Zaldivar-Lopez S, Garrido JJ, Montoya M. SARS-CoV-2 Accessory Proteins in Viral Pathogenesis: Knowns and Unknowns. *Front Immunol.* 2021;12:708264.
60. Bosch BJ, van der Zee R, de Haan CA, Rottier PJ. The coronavirus spike protein is a class I virus fusion protein: structural and functional characterization of the fusion core complex. *J Virol.* 2003;77(16):8801-11.
61. Li F. Structure, Function, and Evolution of Coronavirus Spike Proteins. *Annu Rev Virol.* 2016;3(1):237-61.
62. Wrapp D, Wang N, Corbett KS, Goldsmith JA, Hsieh CL, Abiona O, et al. Cryo-EM structure of the 2019-nCoV spike in the prefusion conformation. *Science.* 2020;367(6483):1260-3.
63. Walls AC, Park YJ, Tortorici MA, Wall A, McGuire AT, Veesler D. Structure, Function, and Antigenicity of the SARS-CoV-2 Spike Glycoprotein. *Cell.* 2020;181(2):281-92 e6.
64. Khare S, Azevedo M, Parajuli P, Gokulan K. Conformational Changes of the Receptor Binding Domain of SARS-CoV-2 Spike Protein and Prediction of a B-Cell Antigenic Epitope Using Structural Data. *Front Artif Intell.* 2021;4:630955.
65. Lan J, Ge J, Yu J, Shan S, Zhou H, Fan S, et al. Structure of the SARS-CoV-2 spike receptor-binding domain bound to the ACE2 receptor. *Nature.* 2020;581(7807):215-20.
66. Millet JK, Whittaker GR. Host cell proteases: Critical determinants of coronavirus tropism and pathogenesis. *Virus Res.* 2015;202:120-34.
67. Hamming I, Timens W, Bulthuis ML, Lely AT, Navis G, van Goor H. Tissue distribution of ACE2 protein, the functional receptor for SARS coronavirus. A first step in understanding SARS pathogenesis. *J Pathol.* 2004;203(2):631-7.
68. Glowacka I, Bertram S, Muller MA, Allen P, Soilleux E, Pfefferle S, et al. Evidence that TMPRSS2 activates the severe acute respiratory syndrome coronavirus spike protein for membrane fusion and reduces viral control by the humoral immune response. *J Virol.* 2011;85(9):4122-34.
69. Zhao MM, Yang WL, Yang FY, Zhang L, Huang WJ, Hou W, et al. Cathepsin L plays a key role in SARS-CoV-2 infection in humans and humanized mice and is a promising target for new drug development. *Signal Transduct Target Ther.* 2021;6(1):134.
70. Hoffmann M, Kleine-Weber H, Schroeder S, Kruger N, Herrler T, Erichsen S, et al. SARS-CoV-2 Cell Entry Depends on ACE2 and TMPRSS2 and Is Blocked by a Clinically Proven Protease Inhibitor. *Cell.* 2020;181(2):271-80 e8.
71. Duchene S, Featherstone L, Haritopoulou-Sinanidou M, Rambaut A, Lemey P, Baele G. Temporal signal and the phylodynamic threshold of SARS-CoV-2. *Virus Evol.* 2020;6(2):veaa061.
72. [Ecdc.europa.eu](https://www.ecdc.europa.eu/en/publications-data/methods-detection-and-characterisation-sars-cov-2-variants-first-update) [Internet]. Methods for the detection and characterisation of SARS-CoV-2 variants - first update. European Centre for Disease Prevention and Control. [20 December 2021; cited 7 January 2022]. Available from: <https://www.ecdc.europa.eu/en/publications-data/methods-detection-and-characterisation-sars-cov-2-variants-first-update>

- 1
  - 2
  - 3
  - 4
  - 5
  - 6
  - 7
  - 8
  - 9
  - 10
  - 11
  - 12
  - 13
  - 14
  - 15
  - 16
  - 17
  - 18
  - 19
  - 20
  - 21
  - 22
  - 23
  - 24
  - 25
  - 26
  - 27
  - 28
  - 29
  - 30
  - 31
  - 32
  - 33
  - 34
  - 35
  - 36
  - 37
  - 38
  - 39
  - 40
  - 41
  - 42
  - 43
  - 44
  - 45
  - 46
  - 47
  - 48
  - 49
  - 50
  - 51
  - 52
  - 53
  - 54
  - 55
  - 56
  - 57
  - 58
  - 59
  - 60
73. Cdc.gov [Internet]. COVID-19: About Variants. Centers for Disease Control and Prevention. [13 December 2021; cited 7 January 2022]. Available from: <https://www.cdc.gov/coronavirus/2019-ncov/variants/about-variants.html>
74. Imperial.ac.uk [Internet]. Report 50 - Hospitalisation risk for Omicron cases in England. Imperial College London, MRC Centre for Global Infectious Disease Analysis. [22 December 2021; cited 10 January 2022]. Available from: <https://www.imperial.ac.uk/mrc-global-infectious-disease-analysis/covid-19/report-50-severity-omicron/>
75. Gov.uk [Internet]. SARS-CoV-2 variants of concern and variants under investigation in England - Technical briefing 33. UK Health Security Agency. [23 December 2021; cited 10 January 2022]. Available from: [https://assets.publishing.service.gov.uk/government/uploads/system/uploads/attachment\\_data/file/1043807/technical-briefing-33.pdf](https://assets.publishing.service.gov.uk/government/uploads/system/uploads/attachment_data/file/1043807/technical-briefing-33.pdf)
76. Luna-Muschi A, Borges IC, de Faria E, Barboza AS, Maia FL, Leme MD, et al. Clinical features of COVID-19 by SARS-CoV-2 Gamma variant: A prospective cohort study of vaccinated and unvaccinated healthcare workers. *J Infect.* 2021.
77. Gov.uk [Internet]. Investigation of novel SARS-CoV-2 variant - Variant of Concern 202012/01 - Technical briefing 5. UK Health Security Agency (formerly Public Health England). [14 January 2021; cited 10 January 2022]. Available from: [https://assets.publishing.service.gov.uk/government/uploads/system/uploads/attachment\\_data/file/959426/Variant\\_of\\_Concern\\_VOC\\_202012\\_01\\_Technical\\_Briefing\\_5.pdf](https://assets.publishing.service.gov.uk/government/uploads/system/uploads/attachment_data/file/959426/Variant_of_Concern_VOC_202012_01_Technical_Briefing_5.pdf)
78. Wang Y, Liu M, Gao J. Enhanced receptor binding of SARS-CoV-2 through networks of hydrogen-bonding and hydrophobic interactions. *Proc Natl Acad Sci U S A.* 2020;117(25):13967-74.
79. Yi C, Sun X, Ye J, Ding L, Liu M, Yang Z, et al. Key residues of the receptor binding motif in the spike protein of SARS-CoV-2 that interact with ACE2 and neutralizing antibodies. *Cell Mol Immunol.* 2020;17(6):621-30.
80. Starr TN, Greaney AJ, Hilton SK, Ellis D, Crawford KHD, Dingens AS, et al. Deep Mutational Scanning of SARS-CoV-2 Receptor Binding Domain Reveals Constraints on Folding and ACE2 Binding. *Cell.* 2020;182(5):1295-310 e20.
81. Huang Y, Yang C, Xu XF, Xu W, Liu SW. Structural and functional properties of SARS-CoV-2 spike protein: potential antiviral drug development for COVID-19. *Acta Pharmacol Sin.* 2020;41(9):1141-9.
82. Hoffmann M, Kleine-Weber H, Pohlmann S. A Multibasic Cleavage Site in the Spike Protein of SARS-CoV-2 Is Essential for Infection of Human Lung Cells. *Mol Cell.* 2020;78(4):779-84 e5.
83. Peacock TP, Goldhill DH, Zhou J, Baillon L, Frise R, Swann OC, et al. The furin cleavage site of SARS-CoV-2 spike protein is a key determinant for transmission due to enhanced replication in airway cells. *BioRxiv [Preprint].* 2020.
84. Zhu Y, Feng F, Hu G, Wang Y, Yu Y, Zhu Y, et al. The S1/S2 boundary of SARS-CoV-2 spike protein modulates cell entry pathways and transmission. *BioRxiv [Preprint].* 2020.
85. Scudellari M. How the coronavirus infects cells - and why Delta is so dangerous. *Nature.* 2021;595(7869):640-4.

- 1  
2  
3  
4  
5  
6  
7  
8  
9  
10  
11  
12  
13  
14  
15  
16  
17  
18  
19  
20  
21  
22  
23  
24  
25  
26  
27  
28  
29  
30  
31  
32  
33  
34  
35  
36  
37  
38  
39  
40  
41  
42  
43  
44  
45  
46  
47  
48  
49  
50  
51  
52  
53  
54  
55  
56  
57  
58  
59  
60
86. Wang Q, Qiu Y, Li JY, Zhou ZJ, Liao CH, Ge XY. A Unique Protease Cleavage Site Predicted in the Spike Protein of the Novel Pneumonia Coronavirus (2019-nCoV) Potentially Related to Viral Transmissibility. *Virologica Sinica*. 2020;35(3):337-9.
  87. Yurkovetskiy L, Wang X, Pascal KE, Tomkins-Tinch C, Nyalile TP, Wang Y, et al. Structural and Functional Analysis of the D614G SARS-CoV-2 Spike Protein Variant. *Cell*. 2020;183(3):739-51 e8.
  88. McCarthy KR, Rennick LJ, Nambulli S, Robinson-McCarthy LR, Bain WG, Haidar G, et al. Natural deletions in the SARS-CoV-2 spike glycoprotein drive antibody escape. *BioRxiv [Preprint]*. 2021.
  89. Kemp SA, Collier DA, Datir R, Ferreira I, Gayed S, Jahun A, et al. Neutralising antibodies in Spike mediated SARS-CoV-2 adaptation. *MedRxiv [Preprint]*. 2020.
  90. Gamage AM, Tan KS, Chan WOY, Liu J, Tan CW, Ong YK, et al. Infection of human Nasal Epithelial Cells with SARS-CoV-2 and a 382-nt deletion isolate lacking ORF8 reveals similar viral kinetics and host transcriptional profiles. *PLoS Pathog*. 2020;16(12):e1009130.
  91. Collier DA, De Marco A, Ferreira I, Meng B, Datir RP, Walls AC, et al. Sensitivity of SARS-CoV-2 B.1.1.7 to mRNA vaccine-elicited antibodies. *Nature*. 2021;593(7857):136-41.
  92. Martínez-García L, Espinel MA, Abreu M, González-Alba JM, Gijón D, McGee A, et al. Emergence and Spread of B. 1.1. 7 Lineage in Primary Care and Clinical Impact in the Morbi-Mortality among Hospitalized Patients in Madrid, Spain. *Microorganisms*. 2021;9(7):1517.
  93. Vassallo M, Manni S, Klotz C, Fabre R, Pini P, Blanchouin E, et al. Patients Admitted for Variant Alpha COVID-19 Have Poorer Outcomes than Those Infected with the Old Strain. *J Clin Med*. 2021;10(16).
  94. McAlister FA, Nabipoor M, Chu A, Lee DS, Saxinger L, Bakal JA. Lessons from the COVID-19 third wave in Canada: the impact of variants of concern and shifting demographics. *MedRxiv [Preprint]*. 2021.
  95. Davies NG, Abbott S, Barnard RC, Jarvis CI, Kucharski AJ, Munday JD, et al. Estimated transmissibility and impact of SARS-CoV-2 lineage B.1.1.7 in England. *Science*. 2021;372(6538).
  96. Leung K, Shum MH, Leung GM, Lam TT, Wu JT. Early transmissibility assessment of the N501Y mutant strains of SARS-CoV-2 in the United Kingdom, October to November 2020. *Euro Surveill*. 2021;26(1).
  97. Zhao S, Lou J, Cao L, Zheng H, Chong MKC, Chen Z, et al. Quantifying the transmission advantage associated with N501Y substitution of SARS-CoV-2 in the UK: an early data-driven analysis. *J Travel Med*. 2021;28(2).
  98. Gov.uk [Internet]. NERVTAG paper on COVID-19 variant of concern B.1.1.7. NERVTAG - COVID-19 Public statements. [22 January 2021; cited 7 October 2021] Available from: [https://assets.publishing.service.gov.uk/government/uploads/system/uploads/attachment\\_data/file/961037/NERVTAG\\_note\\_on\\_B.1.1.7\\_severity\\_for\\_SAGE\\_77\\_\\_1\\_.pdf](https://assets.publishing.service.gov.uk/government/uploads/system/uploads/attachment_data/file/961037/NERVTAG_note_on_B.1.1.7_severity_for_SAGE_77__1_.pdf)
  99. Challen R, Brooks-Pollock E, Read JM, Dyson L, Tsaneva-Atanasova K, Danon L. Risk of mortality in patients infected with SARS-CoV-2 variant of concern 202012/1: matched cohort study. *BMJ*. 2021;372:n579.

100. Paredes MI, Lunn SM, Famulare M, Frisbie LA, Painter I, Burstein R, et al. Associations between SARS-CoV-2 variants and risk of COVID-19 hospitalization among confirmed cases in Washington State: a retrospective cohort study. *MedRxiv* [Preprint]. 2021.
101. Wang P, Nair MS, Liu L, Iketani S, Luo Y, Guo Y, et al. Antibody Resistance of SARS-CoV-2 Variants B.1.351 and B.1.1.7. *BioRxiv* [Preprint]. 2021:2021.01.25.428137.
102. Wu K, Werner AP, Moliva JI, Koch M, Choi A, Stewart-Jones GBE, et al. mRNA-1273 vaccine induces neutralizing antibodies against spike mutants from global SARS-CoV-2 variants. *BioRxiv* [Preprint]. 2021.
103. Gallais F, Gantner P, Bruel T, Velay A, Planas D, Wendling M-J, et al. Anti-SARS-CoV-2 Antibodies Persist for up to 13 Months and Reduce Risk of Reinfection. *MedRxiv* [Preprint]. 2021.
104. [Ecdc.europa.eu](https://www.ecdc.europa.eu/en/covid-19/variants-concern) [Internet]. SARS-CoV-2 variants of concern as of 20 January 2022. European Centre for Disease Prevention and Control. [20 January 2022; cited 24 January 2022] Available from: <https://www.ecdc.europa.eu/en/covid-19/variants-concern>
105. Gu H, Chen Q, Yang G, He L, Fan H, Deng YQ, et al. Adaptation of SARS-CoV-2 in BALB/c mice for testing vaccine efficacy. *Science*. 2020;369(6511):1603-7.
106. Plante JA, Liu Y, Liu J, Xia H, Johnson BA, Lokugamage KG, et al. Spike mutation D614G alters SARS-CoV-2 fitness. *Nature*. 2021;592(7852):116-21.
107. Pearson CA, Russell TW, Davies NG, Kucharski AJ, group CC-w, Edmunds WJ, et al. Estimates of severity and transmissibility of novel South Africa SARS-CoV-2 variant 501Y.V2. Centre for Mathematical Modelling of Infectious Diseases. CMMID Repository [Preprint]. 2021.
108. Wibmer CK, Ayres F, Hermanus T, Madzivhandila M, Kgagudi P, Oosthuysen B, et al. SARS-CoV-2 501Y.V2 escapes neutralization by South African COVID-19 donor plasma. *Nat Med*. 2021;27(4):622-5.
109. Sinha S, Tam B, Wang SM. Altered interaction between RBD and ACE2 receptor contributes towards the increased transmissibility of SARS CoV-2 delta, kappa, beta, and gamma strains with RBD double mutations. *BioRxiv* [Preprint]. 2021.
110. Campbell F, Archer B, Laurenson-Schafer H, Jinnai Y, Konings F, Batra N, et al. Increased transmissibility and global spread of SARS-CoV-2 variants of concern as at June 2021. *Euro Surveill*. 2021;26(24).
111. [Ecdc.europa.eu](https://www.ecdc.europa.eu/en/publications-data/covid-19-risk-assessment-variants-vaccine-fourteenth-update-february-2021) [Internet]. Risk assessment: SARS-CoV-2 - increased circulation of variants of concern and vaccine rollout in the EU/EEA, 14th update. European Centre for Disease Prevention and Control. [15 February 2021; cited 8 October 2021] Available from: <https://www.ecdc.europa.eu/en/publications-data/covid-19-risk-assessment-variants-vaccine-fourteenth-update-february-2021>
112. Khan A, Zia T, Suleman M, Khan T, Ali SS, Abbasi AA, et al. Higher infectivity of the SARS-CoV-2 new variants is associated with K417N/T, E484K, and N501Y mutants: An insight from structural data. *J Cell Physiol*. 2021;236(10):7045-57.
113. Baum A, Fulton BO, Wloga E, Copin R, Pascal KE, Russo V, et al. Antibody cocktail to SARS-CoV-2 spike protein prevents rapid mutational escape seen with individual antibodies. *Science*. 2020;369(6506):1014-8.

114. Curran J, Dol J, Boulos L, Somerville M, McCulloch H, MacDonald M, et al. Transmission characteristics of SARS-CoV-2 variants of concern. *MedRxiv [Preprint]*. 2021.
115. de Faria E, Guedes AR, Oliveira MS, de Godoy Moreira MV, Maia FL, dos Santos Barboza A, et al. Performance of vaccination with CoronaVac in a cohort of healthcare workers (HCW) - preliminary report. *MedRxiv [Preprint]*. 2021.
116. Freitas ARR, Beckedorff OA, Cavalcanti LPG, Siqueira AM, Castro DB, Costa CFD, et al. The emergence of novel SARS-CoV-2 variant P.1 in Amazonas (Brazil) was temporally associated with a change in the age and sex profile of COVID-19 mortality: A population based ecological study. *Lancet Reg Health Am*. 2021;1:100021.
117. Funk T, Pharris A, Spiteri G, Bundle N, Melidou A, Carr M, et al. Characteristics of SARS-CoV-2 variants of concern B.1.1.7, B.1.351 or P.1: data from seven EU/EEA countries, weeks 38/2020 to 10/2021. *Euro Surveill*. 2021;26(16).
118. Sabino EC, Buss LF, Carvalho MPS, Prete CA, Jr., Crispim MAE, Fraiji NA, et al. Resurgence of COVID-19 in Manaus, Brazil, despite high seroprevalence. *Lancet*. 2021;397(10273):452-5.
119. Dejnirattisai W, Zhou D, Supasa P, Liu C, Mentzer AJ, Ginn HM, et al. Antibody evasion by the P.1 strain of SARS-CoV-2. *Cell*. 2021;184(11):2939-54 e9.
120. Korber B, Fischer WM, Gnanakaran S, Yoon H, Theiler J, Abfalterer W, et al. Tracking Changes in SARS-CoV-2 Spike: Evidence that D614G Increases Infectivity of the COVID-19 Virus. *Cell*. 2020;182(4):812-27 e19.
121. Volz E, Hill V, McCrone JT, Price A, Jorgensen D, O'Toole A, et al. Evaluating the Effects of SARS-CoV-2 Spike Mutation D614G on Transmissibility and Pathogenicity. *Cell*. 2021;184(1):64-75 e11.
122. Augusto G, Mohsen MO, Zinkhan S, Liu X, Vogel M, Bachmann MF. In vitro data suggest that Indian delta variant B.1.617 of SARS-CoV-2 escapes neutralization by both receptor affinity and immune evasion. *Allergy*. 2021.
123. Tchesnokova V, Kulakesara H, Larson L, Bowers V, Rechkina E, Kisiela D, et al. Acquisition of the L452R mutation in the ACE2-binding interface of Spike protein triggers recent massive expansion of SARS-Cov-2 variants. *BioRxiv [Preprint]*. 2021.
124. Li Q, Wu J, Nie J, Zhang L, Hao H, Liu S, et al. The Impact of Mutations in SARS-CoV-2 Spike on Viral Infectivity and Antigenicity. *Cell*. 2020;182(5):1284-94 e9.
125. Di Giacomo S, Mercatelli D, Rakhimov A, Giorgi FM. Preliminary report on severe acute respiratory syndrome coronavirus 2 (SARS-CoV-2) Spike mutation T478K. *J Med Virol*. 2021;93(9):5638-43.
126. Torjesen I. Covid-19: Delta variant is now UK's most dominant strain and spreading through schools. *BMJ*. 2021;373:n1445.
127. Reuters.com [Internet]. Delta COVID variant now dominant strain worldwide, U.S. deaths surge -officials. O'donnell C, Mason J, Reuters. [16 July 2021; cited 6 January 2022]. Available from: [www.reuters.com](http://www.reuters.com)
128. Euro.who.int [Internet]. SARS-CoV-2 Delta variant now dominant in much of European region; efforts must be reinforced to prevent transmission, warns WHO Regional Office for Europe and ECDC. World Health Organisation. [23 July 2021; cited 11 October 2021]. Available from: <https://www.euro.who.int/en/media->

- centre/sections/press-releases/2021/sars-cov-2-delta-variant-now-dominant-in-much-of-european-region-efforts-must-be-reinforced-to-prevent-transmission,-warns-who-regional-office-for-europe-and-ecdc
129. Li B, Deng A, Li K, Hu Y, Li Z, Xiong Q, et al. Viral infection and transmission in a large, well-traced outbreak caused by the SARS-CoV-2 Delta variant MedRxiv [Preprint]. 2021.
130. Teyssou E, Delagreverie H, Visseaux B, Lambert-Niclot S, Briclher S, Ferre V, et al. The Delta SARS-CoV-2 variant has a higher viral load than the Beta and the historical variants in nasopharyngeal samples from newly diagnosed COVID-19 patients. *J Infect.* 2021;83(4):e1-e3.
131. Kumar A, Asghar A, Raza K, Narayan RK, Jha RK, Satyam A, et al. Demographic characteristics of SARS-CoV-2 B.1.617.2 (Delta) variant infections in Indian population. MedRxiv [Preprint]. 2021.
132. Planas D, Veyer D, Baidaliuk A, Staropoli I, Guivel-Benhassine F, Rajah MM, et al. Reduced sensitivity of SARS-CoV-2 variant Delta to antibody neutralization. *Nature.* 2021;596(7871):276-80.
133. Sheikh A, McMenamin J, Taylor B, Robertson C, Public Health S, the EIIC. SARS-CoV-2 Delta VOC in Scotland: demographics, risk of hospital admission, and vaccine effectiveness. *Lancet.* 2021;397(10293):2461-2.
134. Fisman DN, Tuite AR. Progressive Increase in Virulence of Novel SARS-CoV-2 Variants in Ontario, Canada. MedRxiv [Preprint]. 2021.
135. Cameroni E, Saliba C, Bowen JE, Rosen LE, Culap K, Pinto D, et al. Broadly neutralizing antibodies overcome SARS-CoV-2 Omicron antigenic shift. BioRxiv [Preprint]. 2021.
136. Shah M, Woo HG. Omicron: A heavily mutated SARS-CoV-2 variant exhibits stronger binding to ACE2 and potentially escape approved COVID-19 therapeutic antibodies. BioRxiv [Preprint]. 2021.
137. Wolter N, Jassat W, Walaza S, Welch R, Moultrie H, Groome M, et al. Early assessment of the clinical severity of the SARS-CoV-2 Omicron variant in South Africa. MedRxiv [Preprint]. 2021.
138. Gov.uk [Internet]. Omicron daily overview: 24 December 2021. UK Health Security Agency. [24 December 2021; cited 4 January 2022]. Available from: [https://assets.publishing.service.gov.uk/government/uploads/system/uploads/attachment\\_data/file/1043866/20211224\\_OS\\_Daily\\_Omicron\\_Overview.pdf](https://assets.publishing.service.gov.uk/government/uploads/system/uploads/attachment_data/file/1043866/20211224_OS_Daily_Omicron_Overview.pdf)
139. Who.int [Internet]. Enhancing readiness for Omicron (B.1.1.529): Technical brief and priority actions for Member States. World Health Organisation. [23 December 2021; cited 4 January 2022]. Available from: [https://www.who.int/docs/default-source/coronaviruse/2021-12-23-global-technical-brief-and-priority-action-on-omicron.pdf?sfvrsn=d0e9fb6c\\_8](https://www.who.int/docs/default-source/coronaviruse/2021-12-23-global-technical-brief-and-priority-action-on-omicron.pdf?sfvrsn=d0e9fb6c_8)
140. Med.hku.hk [Internet]. HKUMed finds Omicron SARS-CoV-2 can infect faster and better than Delta in human bronchus but with less severe infection in lung. The University of Hong Kong, LKS Faculty of Medicine. [15 December 2021; cited 5 January 2022]. Available from: <https://www.med.hku.hk/en/news/press/20211215-omicron-sars-cov-2-infection>

141. Sheikh A, Kerr S, Woolhouse M, McMenamin J, C. R. Severity of Omicron variant of concern and vaccine effectiveness against symptomatic disease: national cohort with nested test negative design study in Scotland. 2021.
142. Pulliam JRC, van Schalkwyk C, Govender N, von Gottberg A, Cohen C, Groome MJ, et al. Increased risk of SARS-CoV-2 reinfection associated with emergence of the Omicron variant in South Africa. MedRxiv [Preprint]. 2021.
143. Sandile Cele, Laurelle Jackson, Khadija Khan, David Khoury, Thandeka Moyo-Gwete, Houriiyah Tegally, et al. SARS-CoV-2 Omicron has extensive but incomplete escape of Pfizer BNT162b2 elicited neutralization and requires ACE2 for infection. MedRxiv [Preprint]. 2021.
144. Planas D, Saunders N, Maes P, Guivel-Benhassine F, Planchais C, Buchrieser J, et al. Considerable escape of SARS-CoV-2 variant Omicron to antibody neutralization. BioRxiv [Preprint]. 2021.
145. Meng B, Ferreira IATM, Abdullahi A, Saito A, Kimura I, Yamasoba D, et al. SARS-CoV-2 Omicron spike mediated immune escape, infectivity and cell-cell fusion. BioRxiv [Preprint]. 2021.
146. Pfizer.com [Internet]. Pfizer and BioNTech Provide Update on Omicron Variant. Pfizer. [8 December 2021; cited 4 January 2022]. Available from: <https://www.pfizer.com/news/press-release/press-release-detail/pfizer-and-biontech-provide-update-omicron-variant>
147. Keeton R, Tincho MB, Ngomti A, Baguma R, Benede N, Suzuki A, et al. SARS-CoV-2 spike T cell responses induced upon vaccination or infection remain robust against Omicron. MedRxiv [Preprint]. 2021.
148. Sacoronavirus.co.za [Internet]. Cabinet approves changes to covid-19 regulations. South Africa Department of Health. [30 December 2021; cited 7 January 2022]. Available from: <https://sacoronavirus.co.za/2021/12/30/media-release-cabinet-approves-changes-to-covid-19-regulations/>
149. Taylor L. Covid-19: Omicron drives weekly record high in global infections. BMJ. 2022;376:o66.
150. Tada T, Zhou H, Dcosta BM, Samanovic MI, Mulligan MJ, Landau NR. SARS-CoV-2 Lambda Variant Remains Susceptible to Neutralization by mRNA Vaccine-elicited Antibodies and Convalescent Serum. BioRxiv [Preprint]. 2021.
151. Acevedo ML, Alonso-Palomares L, Bustamante A, Gaggero A, Paredes F, Cortés CP, et al. Infectivity and immune escape of the new SARS-CoV-2 variant of interest Lambda. MedRxiv [Preprint]. 2021.
152. Laiton-Donato K, Franco-Munoz C, Alvarez-Diaz DA, Ruiz-Moreno HA, Usme-Ciro JA, Prada DA, et al. Characterization of the emerging B.1.621 variant of interest of SARS-CoV-2. Infect Genet Evol. 2021;95:105038.
153. Chen J, Gao K, Wang R, Wei GW. Revealing the Threat of Emerging SARS-CoV-2 Mutations to Antibody Therapies. J Mol Biol. 2021;433(18):167155.
154. Amanat F, Krammer F. SARS-CoV-2 vaccines: status report. Immunity. 2020;52(4):583-9.
155. Who.int [Internet]. COVID-19 vaccine tracker and landscape. World Health Organisation. [25 January 2022; cited 26 January 2022]. Available from: <https://www.who.int/publications/m/item/draft-landscape-of-covid-19-candidate-vaccines>



156. Polack FP, Thomas SJ, Kitchin N, Absalon J, Gurtman A, Lockhart S, et al. Safety and Efficacy of the BNT162b2 mRNA Covid-19 Vaccine. *N Engl J Med.* 2020;383(27):2603-15.
157. Wrapp D, Wang N, Corbett KS, Goldsmith JA, Hsieh C-L, Abiona O, et al. Cryo-EM structure of the 2019-nCoV spike in the prefusion conformation. *Science.* 2020;367(6483):1260-3.
158. Who.int [Internet]. Coronavirus disease (COVID-19): Vaccines. World Health Organisation. [20 January 2022; cited 26 January 2022]. Available from: [https://www.who.int/news-room/questions-and-answers/item/coronavirus-disease-\(covid-19\)-vaccines](https://www.who.int/news-room/questions-and-answers/item/coronavirus-disease-(covid-19)-vaccines)
159. Sahin U, Muik A, Vogler I, Derhovanessian E, Kranz LM, Vormehr M, et al. BNT162b2 vaccine induces neutralizing antibodies and poly-specific T cells in humans. *Nature.* 2021;595(7868):572-7.
160. Arunachalam PS, Scott MKD, Hagan T, Li C, Feng Y, Wimmers F, et al. Systems vaccinology of the BNT162b2 mRNA vaccine in humans. *Nature.* 2021;596(7872):410-6.
161. Walsh EE, Frenck RW, Jr., Falsey AR, Kitchin N, Absalon J, Gurtman A, et al. Safety and Immunogenicity of Two RNA-Based Covid-19 Vaccine Candidates. *N Engl J Med.* 2020;383(25):2439-50.
162. Appelman B, van der Straten K, Lavell AHA, Schinkel M, Slim MA, Poniman M, et al. Time since SARS-CoV-2 infection and humoral immune response following BNT162b2 mRNA vaccination. *EBioMedicine.* 2021;72:103589.
163. Beatty AL, Peyser ND, Butcher XE, Cocohoba JM, Lin F, Olgin JE, et al. Analysis of COVID-19 Vaccine Type and Adverse Effects Following Vaccination. *JAMA Netw Open.* 2021;4(12):e2140364.
164. Vizcarra P, Haemmerle J, Velasco H, Velasco T, Fernandez-Escribano M, Vallejo A, et al. BNT162b2 mRNA COVID-19 vaccine Reactogenicity: The key role of immunity. *Vaccine.* 2021;39(51):7367-74.
165. Salmeron Rios S, Mas Romero M, Cortes Zamora EB, Tabernero Sahuquillo MT, Romero Rijos L, Sanchez-Jurado PM, et al. Immunogenicity of the BNT162b2 vaccine in frail or disabled nursing home residents: COVID-A study. *J Am Geriatr Soc.* 2021;69(6):1441-7.
166. Barda N, Dagan N, Ben-Shlomo Y, Kepten E, Waxman J, Ohana R, et al. Safety of the BNT162b2 mRNA Covid-19 Vaccine in a Nationwide Setting. *N Engl J Med.* 2021;385(12):1078-90.
167. Sharma O, Sultan AA, Ding H, Triggler CR. A Review of the Progress and Challenges of Developing a Vaccine for COVID-19. *Front Immunol.* 2020;11:585354.
168. Who.int [Internet]. WHO lists two additional COVID-19 vaccines for emergency use and COVAX roll-out. World Health Organisation. [15 February 2021; cited 13 October 2021]. Available from: <https://www.who.int/news/item/15-02-2021-who-lists-two-additional-covid-19-vaccines-for-emergency-use-and-covax-roll-out>
169. Ewer KJ, Barrett JR, Belij-Rammerstorfer S, Sharpe H, Makinson R, Morter R, et al. T cell and antibody responses induced by a single dose of ChAdOx1 nCoV-19 (AZD1222) vaccine in a phase 1/2 clinical trial. *Nat Med.* 2021;27(2):270-8.
170. Folegatti PM, Ewer KJ, Aley PK, Angus B, Becker S, Belij-Rammerstorfer S, et al. Safety and immunogenicity of the ChAdOx1 nCoV-19 vaccine against SARS-

- 1  
2  
3  
4  
5  
6  
7  
8  
9  
10  
11  
12  
13  
14  
15  
16  
17  
18  
19  
20  
21  
22  
23  
24  
25  
26  
27  
28  
29  
30  
31  
32  
33  
34  
35  
36  
37  
38  
39  
40  
41  
42  
43  
44  
45  
46  
47  
48  
49  
50  
51  
52  
53  
54  
55  
56  
57  
58  
59  
60
- CoV-2: a preliminary report of a phase 1/2, single-blind, randomised controlled trial. *Lancet*. 2020;396(10249):467-78.
171. Al Khames Aga QA, Alkhaffaf WH, Hatem TH, Nassir KF, Batineh Y, Dahham AT, et al. Safety of COVID-19 vaccines. *J Med Virol*. 2021;93(12):6588-94.
172. Sadoff J, Gray G, Vandebosch A, Cardenas V, Shukarev G, Grinsztejn B, et al. Safety and Efficacy of Single-Dose Ad26.COV2.S Vaccine against Covid-19. *N Engl J Med*. 2021;384(23):2187-201.
173. Alter G, Yu J, Liu J, Chandrashekar A, Borducchi EN, Tostanoski LH, et al. Immunogenicity of Ad26.COV2.S vaccine against SARS-CoV-2 variants in humans. *Nature*. 2021;596(7871):268-72.
174. Sadoff J, Le Gars M, Shukarev G, Heerwegh D, Truysers C, de Groot AM, et al. Interim Results of a Phase 1-2a Trial of Ad26.COV2.S Covid-19 Vaccine. *N Engl J Med*. 2021;384(19):1824-35.
175. Keeton R, Richardson SI, Moyo-Gwete T, Hermanus T, Tincho MB, Benede N, et al. Prior infection with SARS-CoV-2 boosts and broadens Ad26.COV2.S immunogenicity in a variant-dependent manner. *Cell Host Microbe*. 2021;29(11):1611-9 e5.
176. See I, Su JR, Lale A, Woo EJ, Guh AY, Shimabukuro TT, et al. US Case Reports of Cerebral Venous Sinus Thrombosis With Thrombocytopenia After Ad26.COV2.S Vaccination, March 2 to April 21, 2021. *JAMA*. 2021;325(24):2448-56.
177. Baden LR, El Sahly HM, Essink B, Kotloff K, Frey S, Novak R, et al. Efficacy and Safety of the mRNA-1273 SARS-CoV-2 Vaccine. *N Engl J Med*. 2021;384(5):403-16.
178. Mukhopadhyay L, Yadav PD, Gupta N, Mohandas S, Patil DY, Shete-Aich A, et al. Comparison of the immunogenicity & protective efficacy of various SARS-CoV-2 vaccine candidates in non-human primates. *Indian J Med Res*. 2021;153(1 & 2):93-114.
179. Anderson EJ, Rouphael NG, Widge AT, Jackson LA, Roberts PC, Makhene M, et al. Safety and Immunogenicity of SARS-CoV-2 mRNA-1273 Vaccine in Older Adults. *N Engl J Med*. 2020;383(25):2427-38.
180. Jackson LA, Anderson EJ, Rouphael NG, Roberts PC, Makhene M, Coler RN, et al. An mRNA Vaccine against SARS-CoV-2 - Preliminary Report. *N Engl J Med*. 2020;383(20):1920-31.
181. Chu L, McPhee R, Huang W, Bennett H, Pajon R, Nestorova B, et al. A preliminary report of a randomized controlled phase 2 trial of the safety and immunogenicity of mRNA-1273 SARS-CoV-2 vaccine. *Vaccine*. 2021;39(20):2791-9.
182. Who.int [Internet]. Interim recommendations for use of the inactivated COVID-19 vaccine BIBP developed by China National Biotech Group (CNBG), Sinopharm. World Health Organisation. [28 October 2021; cited 7 January 2022]. Available from: <https://www.who.int/publications/i/item/WHO-2019-nCoV-vaccines-SAGE-recommendation-BIBP>
183. Who.int [Internet]. Background document on the inactivated vaccine Sinovac-CoronaVac against COVID-19. World Health Organisation. [1 June 2021; cited 13 October 2021]. Available from: [https://www.who.int/publications/i/item/WHO-2019-nCoV-vaccines-SAGE\\_recommendation-Sinovac-CoronaVac-background-2021.1](https://www.who.int/publications/i/item/WHO-2019-nCoV-vaccines-SAGE_recommendation-Sinovac-CoronaVac-background-2021.1)
184. Who.int [Internet]. Background document on the Bharat Biotech BBV152 COVAXIN® (COVID-19) vaccine. World Health Organisation. [3 November 2021;

- 1  
2  
3 cited 7 January 2022]. Available from: <https://www.who.int/publications/i/item/WHO-2019-nCoV-vaccines-SAGE-recommendation-bbv152-covaxin-background>
- 4  
5  
6 185. Who.int [Internet]. WHO issues emergency use listing for eighth COVID-19  
7 vaccine. World Health Organisation. [3 November 2021; cited 7 January 2022].  
8 Available from: [https://www.who.int/news/item/03-11-2021-who-issues-emergency-](https://www.who.int/news/item/03-11-2021-who-issues-emergency-use-listing-for-eighth-covid-19-vaccine)  
9 [use-listing-for-eighth-covid-19-vaccine](https://www.who.int/news/item/03-11-2021-who-issues-emergency-use-listing-for-eighth-covid-19-vaccine)
- 10  
11 186. Who.int [Internet]. WHO lists 9th COVID-19 vaccine for emergency use with  
12 aim to increase access to vaccination in lower-income countries. World Health  
13 Organisation. [17 December 2021; cited 7 January 2022]. Available from:  
14 [https://www.who.int/news/item/17-12-2021-who-lists-9th-covid-19-vaccine-for-](https://www.who.int/news/item/17-12-2021-who-lists-9th-covid-19-vaccine-for-emergency-use-with-aim-to-increase-access-to-vaccination-in-lower-income-countries)  
15 [emergency-use-with-aim-to-increase-access-to-vaccination-in-lower-income-](https://www.who.int/news/item/17-12-2021-who-lists-9th-covid-19-vaccine-for-emergency-use-with-aim-to-increase-access-to-vaccination-in-lower-income-countries)  
16 [countries](https://www.who.int/news/item/17-12-2021-who-lists-9th-covid-19-vaccine-for-emergency-use-with-aim-to-increase-access-to-vaccination-in-lower-income-countries)
- 17  
18 187. Who.int [Internet]. WHO lists 10th COVID-19 vaccine for emergency use:  
19 Nuvaxovid. World Health Organisation. [21 December 2021; cited 7 January 2022].  
20 Available from: [https://www.who.int/news/item/21-12-2021-who-lists-10th-covid-19-](https://www.who.int/news/item/21-12-2021-who-lists-10th-covid-19-vaccine-for-emergency-use-nuvaxovid)  
21 [vaccine-for-emergency-use-nuvaxovid](https://www.who.int/news/item/21-12-2021-who-lists-10th-covid-19-vaccine-for-emergency-use-nuvaxovid)
- 22  
23 188. Who.int [Internet]. Interim recommendations for use of the Novavax NVX-  
24 CoV2373 vaccine against COVID-19. World Health Organisation. [20 December 2021;  
25 cited 7 January 2022]. Available from: [https://www.who.int/publications/i/item/WHO-](https://www.who.int/publications/i/item/WHO-2019-nCoV-vaccines-SAGE-recommendation-novavax-nvx-cov2373)  
26 [2019-nCoV-vaccines-SAGE-recommendation-novavax-nvx-cov2373](https://www.who.int/publications/i/item/WHO-2019-nCoV-vaccines-SAGE-recommendation-novavax-nvx-cov2373)
- 27  
28 189. Mishra SK, Pradhan SK, Pati S, Sahu S, Nanda RK. Waning of Anti-spike  
29 Antibodies in AZD1222 (ChAdOx1) Vaccinated Healthcare Providers: A Prospective  
30 Longitudinal Study. *Cureus*. 2021;13(11):e19879.
- 31  
32 190. Tre-Hardy M, Cupaiolo R, Wilmet A, Antoine-Moussiaux T, Della Vecchia A,  
33 Horeanga A, et al. Immunogenicity of mRNA-1273 COVID vaccine after 6 months  
34 surveillance in health care workers; a third dose is necessary. *J Infect*. 2021;83(5):559-  
35 64.
- 36  
37 191. Shrotri M, Navaratnam AMD, Nguyen V, Byrne T, Geismar C, Fragaszy E, et  
38 al. Spike-antibody waning after second dose of BNT162b2 or ChAdOx1. *Lancet*.  
39 2021;398(10298):385-7.
- 40  
41 192. Chemaitelly H, Tang P, Hasan MR, AlMukdad S, Yassine HM, Benslimane  
42 FM, et al. Waning of BNT162b2 Vaccine Protection against SARS-CoV-2 Infection in  
43 Qatar. *N Engl J Med*. 2021.
- 44  
45 193. Mizrahi B, Lotan R, Kalkstein N, Peretz A, Perez G, Ben-Tov A, et al.  
46 Correlation of SARS-CoV-2 Breakthrough Infections to Time-from-vaccine;  
47 Preliminary Study. *MedRxiv* [Preprint]. 2021.
- 48  
49 194. Thomas SJ, Moreira ED, Kitchin N, Absalon J, Gurtman A, Lockhart S, et al.  
50 Six Month Safety and Efficacy of the BNT162b2 mRNA COVID-19 Vaccine.  
51 *MedRxiv* [Preprint]. 2021.
- 52  
53 195. Tre-Hardy M, Cupaiolo R, Wilmet A, Antoine-Moussiaux T, Della Vecchia A,  
54 Horeanga A, et al. Six-month interim analysis of ongoing immunogenicity surveillance  
55 of the mRNA-1273 vaccine in healthcare workers: A third dose is expected. *J Infect*.  
56 2021.
- 57  
58 196. Almendro-Vazquez P, Laguna-Goya R, Ruiz-Ruigomez M, Utrero-Rico A,  
59 Lalueza A, Maestro de la Calle G, et al. Longitudinal dynamics of SARS-CoV-2-  
60

- 1  
2  
3 specific cellular and humoral immunity after natural infection or BNT162b2  
4 vaccination. *PLoS Pathog.* 2021;17(12):e1010211.
- 5  
6 197. Cohen KW, Linderman SL, Moodie Z, Czartoski J, Lai L, Mantus G, et al.  
7 Longitudinal analysis shows durable and broad immune memory after SARS-CoV-2  
8 infection with persisting antibody responses and memory B and T cells. *Cell Rep Med.*  
9 2021;2(7):100354.
- 10  
11 198. Zeng G, Wu Q, Pan H, Li M, Yang J, Wang L, et al. Immunogenicity and safety  
12 of a third dose of CoronaVac, and immune persistence of a two-dose schedule, in  
13 healthy adults: interim results from two single-centre, double-blind, randomised,  
14 placebo-controlled phase 2 clinical trials. *Lancet Infect Dis.* 2021.
- 15  
16 199. Choi A, Koch M, Wu K, Chu L, Ma L, Hill A, et al. Safety and immunogenicity  
17 of SARS-CoV-2 variant mRNA vaccine boosters in healthy adults: an interim analysis.  
18 *Nat Med.* 2021.
- 19  
20 200. Flaxman A, Marchevsky NG, Jenkin D, Aboagye J, Aley PK, Angus B, et al.  
21 Reactogenicity and immunogenicity after a late second dose or a third dose of  
22 ChAdOx1 nCoV-19 in the UK: a substudy of two randomised controlled trials  
23 (COV001 and COV002). *Lancet.* 2021;398(10304):981-90.
- 24  
25 201. Iketani S, Liu L, Nair MS, Mohri H, Wang M, Huang Y, et al. A third COVID-  
26 19 vaccine shot markedly boosts neutralizing antibody potency and breadth *MedRxiv*  
27 [Preprint]. 2021.
- 28  
29 202. Garcia-Beltran WF, St Denis KJ, Hoelzemer A, Lam EC, Nitido AD, Sheehan  
30 ML, et al. mRNA-based COVID-19 vaccine boosters induce neutralizing immunity  
31 against SARS-CoV-2 Omicron variant. *MedRxiv [Preprint].* 2021.
- 32  
33 203. Yorsaeng R, Suntronwong N, Phowatthanasathian H, Assawakosri S,  
34 Kanokudom S, Thongmee T, et al. Immunogenicity of a third dose viral-vectored  
35 COVID-19 vaccine after receiving two-dose inactivated vaccines in healthy adults.  
36 *Vaccine.* 2022;40(3):524-30.
- 37  
38 204. Munro APS, Janani L, Cornelius V, Aley PK, Babbage G, Baxter D, et al. Safety  
39 and immunogenicity of seven COVID-19 vaccines as a third dose (booster) following  
40 two doses of ChAdOx1 nCov-19 or BNT162b2 in the UK (COV-BOOST): a blinded,  
41 multicentre, randomised, controlled, phase 2 trial. *Lancet.* 2021;398(10318):2258-76.
- 42  
43 205. Madelon N, Heikkilä N, Sabater Royo I, Fontannaz P, Breville G, Lauper K, et  
44 al. Omicron-specific cytotoxic T-cell responses are boosted following a third dose of  
45 mRNA COVID-19 vaccine in anti-CD20-treated multiple sclerosis patients *MedRxiv*  
46 [Preprint]. 2021.
- 47  
48 206. Bar-On YM, Goldberg Y, Mandel M, Bodenheimer O, Freedman L, Kalkstein  
49 N, et al. Protection of BNT162b2 Vaccine Booster against Covid-19 in Israel. *N Engl*  
50 *J Med.* 2021;385(15):1393-400.
- 51  
52 207. Barda N, Dagan N, Cohen C, Hernan MA, Lipsitch M, Kohane IS, et al.  
53 Effectiveness of a third dose of the BNT162b2 mRNA COVID-19 vaccine for  
54 preventing severe outcomes in Israel: an observational study. *Lancet.*  
55 2021;398(10316):2093-100.
- 56  
57 208. Arbel R, Hammerman A, Sergienko R, Friger M, Peretz A, Netzer D, et al.  
58 BNT162b2 Vaccine Booster and Mortality Due to Covid-19. *N Engl J Med.*  
59 2021;385(26):2413-20.  
60

- 1
  - 2
  - 3
  - 4
  - 5
  - 6
  - 7
  - 8
  - 9
  - 10
  - 11
  - 12
  - 13
  - 14
  - 15
  - 16
  - 17
  - 18
  - 19
  - 20
  - 21
  - 22
  - 23
  - 24
  - 25
  - 26
  - 27
  - 28
  - 29
  - 30
  - 31
  - 32
  - 33
  - 34
  - 35
  - 36
  - 37
  - 38
  - 39
  - 40
  - 41
  - 42
  - 43
  - 44
  - 45
  - 46
  - 47
  - 48
  - 49
  - 50
  - 51
  - 52
  - 53
  - 54
  - 55
  - 56
  - 57
  - 58
  - 59
  - 60
209. Spitzer A, Angel Y, Marudi O, Zeltser D, Saiag E, Goldshmidt H, et al. Association of a Third Dose of BNT162b2 Vaccine With Incidence of SARS-CoV-2 Infection Among Health Care Workers in Israel. *JAMA*. 2022.
210. Bar-On YM, Goldberg Y, Mandel M, Bodenheimer O, Freedman L, Alroy-Preis S, et al. Protection against Covid-19 by BNT162b2 Booster across Age Groups. *N Engl J Med*. 2021;385(26):2421-30.
211. Levine-Tiefenbrun M, Yelin I, Alapi H, Katz R, Herzel E, Kuint J, et al. Viral loads of Delta-variant SARS-CoV-2 breakthrough infections after vaccination and booster with BNT162b2. *Nat Med*. 2021;27(12):2108-10.
212. Andrews N, Stowe J, Kirsebom F, Toffa S, Rickeard T, Gallagher E, et al. Effectiveness of COVID-19 vaccines against the Omicron (B.1.1.529) variant of concern. *medRxiv* [Preprint]. 2021.
213. Hansen CH, Schelde AB, Moustsen-Helm IR, Emborg H-D, Krause TG, Mølbak K, et al. Vaccine effectiveness against SARS-CoV-2 infection with the Omicron or Delta variants following a two-dose or booster BNT162b2 or mRNA-1273 vaccination series: A Danish cohort study *MedRxiv* [Preprint]. 2021.
214. Lusvardi S, Pollett SD, Neerukonda SN, Wang W, Wang R, Vassell R, et al. SARS-CoV-2 Omicron neutralization by therapeutic antibodies, convalescent sera, and post-mRNA vaccine booster. *BioRxiv* [Preprint]. 2021.
215. Cdc.gov [Internet]. CDC Recommends Pfizer Booster at 5 Months, Additional Primary Dose for Certain Immunocompromised Children. Centers for Disease Control and Prevention. [4 January 2022; cited 7 January 2022]. Available from: <https://www.cdc.gov/media/releases/2022/s0104-Pfizer-Booster.html>
216. Wu K, Choi A, Koch M, Elbashir S, Ma L, Lee D, et al. Variant SARS-CoV-2 mRNA vaccines confer broad neutralization as primary or booster series in mice. *Vaccine*. 2021;39(51):7394-400.
217. Covid19-trials.com [Internet]. Global Coronavirus COVID-19 Clinical Trial Tracker. Cytel Inc. [cited 12 January 2022]. Available from: <https://www.covid19-trials.com/>
218. Gov.uk [Internet]. First oral antiviral for COVID-19, Lagevrio (molnupiravir), approved by MHRA. Medicines and Healthcare products Regulatory Agency. [4 November 2021; cited 12 January 2022]. Available from: <https://www.gov.uk/government/news/first-oral-antiviral-for-covid-19-lagevrio-molnupiravir-approved-by-mhra>
219. Gov.uk [Internet]. Oral COVID-19 antiviral, Paxlovid, approved by UK regulator. Medicines and Healthcare products Regulatory Agency. [31 December 2021; cited 12 January 2022]. Available from: <https://www.gov.uk/government/news/oral-covid-19-antiviral-paxlovid-approved-by-uk-regulator>
220. Fda.gov [Internet]. Coronavirus (COVID-19) Update: FDA Authorizes Additional Oral Antiviral for Treatment of COVID-19 in Certain Adults. U.S. Food and Drug Administration. [23 December 2021; cited 12 January 2022]. Available from: <https://www.fda.gov/news-events/press-announcements/coronavirus-covid-19-update-fda-authorizes-additional-oral-antiviral-treatment-covid-19-certain>
221. Fda.gov [Internet]. Coronavirus (COVID-19) Update: FDA Authorizes First Oral Antiviral for Treatment of COVID-19. U.S. Food and Drug Administration. [22 December 2021; cited 12 January 2022]. Available from: <https://www.fda.gov/news->

- 1  
2  
3 events/press-announcements/coronavirus-covid-19-update-fda-authorizes-first-oral-  
4 antiviral-treatment-covid-19  
5  
6 222. [ema.europa.eu](https://www.ema.europa.eu) [Internet]. EMA issues advice on use of Lagevrio (molnupiravir)  
7 for the treatment of COVID-19. European Medicines Agency. [19 November 2021.;  
8 cited 12 January 2022]. Available from: [https://www.ema.europa.eu/en/news/ema-](https://www.ema.europa.eu/en/news/ema-issues-advice-use-lagevrio-molnupiravir-treatment-covid-19)  
9 [issues-advice-use-lagevrio-molnupiravir-treatment-covid-19](https://www.ema.europa.eu/en/news/ema-issues-advice-use-lagevrio-molnupiravir-treatment-covid-19)  
10  
11 223. [ema.europa.eu](https://www.ema.europa.eu) [Internet]. EMA issues advice on use of Paxlovid (PF-07321332  
12 and ritonavir) for the treatment of COVID-19: rolling review starts in parallel. European  
13 Medicines Agency. [16 December 2021.; cited 12 January 2022]. Available from:  
14 [https://www.ema.europa.eu/en/news/ema-issues-advice-use-paxlovid-pf-07321332-](https://www.ema.europa.eu/en/news/ema-issues-advice-use-paxlovid-pf-07321332-ritonavir-treatment-covid-19-rolling-review-starts)  
15 [ritonavir-treatment-covid-19-rolling-review-starts](https://www.ema.europa.eu/en/news/ema-issues-advice-use-paxlovid-pf-07321332-ritonavir-treatment-covid-19-rolling-review-starts)  
16  
17 224. [Gov.uk](https://www.gov.uk) [Internet]. MHRA approves Xevudy (sotrovimab), a COVID-19  
18 treatment found to cut hospitalisation and death by 79%. Medicines and Healthcare  
19 products Regulatory Agency. [2 December 2021; cited 12 January 2022]. Available  
20 from: [https://www.gov.uk/government/news/mhra-approves-xevudy-sotrovimab-a-](https://www.gov.uk/government/news/mhra-approves-xevudy-sotrovimab-a-covid-19-treatment-found-to-cut-hospitalisation-and-death-by-79#:~:text=and%20licensing%20guidance-,MHRA%20approves%20Xevudy%20(sotrovimab)%2C%20a%20COVID%2D19%20treatment,risk%20of%20developing%20severe%20disease.)  
21 [covid-19-treatment-found-to-cut-hospitalisation-and-death-by-](https://www.gov.uk/government/news/mhra-approves-xevudy-sotrovimab-a-covid-19-treatment-found-to-cut-hospitalisation-and-death-by-79#:~:text=and%20licensing%20guidance-,MHRA%20approves%20Xevudy%20(sotrovimab)%2C%20a%20COVID%2D19%20treatment,risk%20of%20developing%20severe%20disease.)  
22 [79#:~:text=and%20licensing%20guidance-](https://www.gov.uk/government/news/mhra-approves-xevudy-sotrovimab-a-covid-19-treatment-found-to-cut-hospitalisation-and-death-by-79#:~:text=and%20licensing%20guidance-,MHRA%20approves%20Xevudy%20(sotrovimab)%2C%20a%20COVID%2D19%20treatment,risk%20of%20developing%20severe%20disease.)  
23 [,MHRA%20approves%20Xevudy%20\(sotrovimab\)%2C%20a%20COVID%2D19%20](https://www.gov.uk/government/news/mhra-approves-xevudy-sotrovimab-a-covid-19-treatment-found-to-cut-hospitalisation-and-death-by-79#:~:text=and%20licensing%20guidance-,MHRA%20approves%20Xevudy%20(sotrovimab)%2C%20a%20COVID%2D19%20treatment,risk%20of%20developing%20severe%20disease.)  
24 [treatment,risk%20of%20developing%20severe%20disease.](https://www.gov.uk/government/news/mhra-approves-xevudy-sotrovimab-a-covid-19-treatment-found-to-cut-hospitalisation-and-death-by-79#:~:text=and%20licensing%20guidance-,MHRA%20approves%20Xevudy%20(sotrovimab)%2C%20a%20COVID%2D19%20treatment,risk%20of%20developing%20severe%20disease.)  
25  
26 225. [Fda.gov](https://www.fda.gov) [Internet]. Coronavirus (COVID-19) Update: FDA Authorizes  
27 Additional Monoclonal Antibody for Treatment of COVID-19. U.S. Food and Drug  
28 Administration. [26 May 2021; cited 12 January 2022]. Available from:  
29 [https://www.fda.gov/news-events/press-announcements/coronavirus-covid-19-update-](https://www.fda.gov/news-events/press-announcements/coronavirus-covid-19-update-fda-authorizes-additional-monoclonal-antibody-treatment-covid-19)  
30 [fda-authorizes-additional-monoclonal-antibody-treatment-covid-19](https://www.fda.gov/news-events/press-announcements/coronavirus-covid-19-update-fda-authorizes-additional-monoclonal-antibody-treatment-covid-19)  
31  
32 226. [ema.europa.eu](https://www.ema.europa.eu) [Internet]. COVID-19: EMA recommends authorisation of  
33 antibody medicine Xevudy. European Medicines Agency. [16 December 2021.; cited  
34 12 January 2022]. Available from: [https://www.ema.europa.eu/en/news/covid-19-ema-](https://www.ema.europa.eu/en/news/covid-19-ema-recommends-authorisation-antibody-medicine-xevudy#:~:text=EMA's%20human%20medicines%20committee%20(CHMP,medicin)  
35 [recommends-authorisation-antibody-medicine-](https://www.ema.europa.eu/en/news/covid-19-ema-recommends-authorisation-antibody-medicine-xevudy#:~:text=EMA's%20human%20medicines%20committee%20(CHMP,medicin)  
36 [xevudy#:~:text=EMA's%20human%20medicines%20committee%20\(CHMP,medicin](https://www.ema.europa.eu/en/news/covid-19-ema-recommends-authorisation-antibody-medicine-xevudy#:~:text=EMA's%20human%20medicines%20committee%20(CHMP,medicin)  
37 [e%20together%20with%20Vir%20Biotechnology.](https://www.ema.europa.eu/en/news/covid-19-ema-recommends-authorisation-antibody-medicine-xevudy#:~:text=EMA's%20human%20medicines%20committee%20(CHMP,medicin)  
38  
39 227. [Who.int](https://www.who.int) [Internet]. Therapeutics and COVID-19: living guideline. World  
40 Health Organisation. [14 January 2022; cited 21 January 2022] Available from:  
41 <https://www.who.int/publications/i/item/WHO-2019-nCoV-therapeutics-2022.1>  
42  
43 228. [Nice.org.uk](https://www.nice.org.uk) [Internet]. COVID-19 rapid guideline: managing COVID-19 NICE  
44 guideline [NG191]. National Institute for Health and Care Excellence. [16 December  
45 2021; cited 21 January 2022]. Available from:  
46 <https://www.nice.org.uk/guidance/ng191>  
47  
48 229. [Gov.uk](https://www.gov.uk) [Internet]. MHRA guidance on coronavirus (COVID-19). Medicines  
49 and Healthcare products Regulatory Agency. [16 September 2021; cited 21 January  
50 2022]. Available from: [https://www.gov.uk/government/collections/mhra-guidance-](https://www.gov.uk/government/collections/mhra-guidance-on-coronavirus-covid-19)  
51 [on-coronavirus-covid-19](https://www.gov.uk/government/collections/mhra-guidance-on-coronavirus-covid-19)  
52  
53 230. [ecdc.europa.eu](https://www.ecdc.europa.eu) [Internet]. All resources on COVID-19 – Guidance and  
54 technical reports. [2022; cited 21 January 2022]. Available from:  
55 <https://www.ecdc.europa.eu/en/covid-19/all-reports-covid-19>  
56  
57  
58  
59  
60

- 1
  - 2
  - 3
  - 4
  - 5
  - 6
  - 7
  - 8
  - 9
  - 10
  - 11
  - 12
  - 13
  - 14
  - 15
  - 16
  - 17
  - 18
  - 19
  - 20
  - 21
  - 22
  - 23
  - 24
  - 25
  - 26
  - 27
  - 28
  - 29
  - 30
  - 31
  - 32
  - 33
  - 34
  - 35
  - 36
  - 37
  - 38
  - 39
  - 40
  - 41
  - 42
  - 43
  - 44
  - 45
  - 46
  - 47
  - 48
  - 49
  - 50
  - 51
  - 52
  - 53
  - 54
  - 55
  - 56
  - 57
  - 58
  - 59
  - 60
231. Nih.gov [Internet]. Coronavirus Disease 2019 (COVID-19) Treatment Guidelines. National Institutes of Health [19 January 2022; cited 21 January 2022]. Available from: <https://www.covid19treatmentguidelines.nih.gov/>
232. Cdc.gov [Internet]. Guidance for COVID-19. Centers for Disease Control and Prevention. [15 March 2021; cited 21 January 2022]. Available from: <https://www.cdc.gov/coronavirus/2019-ncov/communication/guidance.html>
233. Blundell R, Costa Dias M, Joyce R, Xu X. COVID-19 and Inequalities. *Fisc Stud.* 2020.
234. Chadeau-Hyam M, Bodinier B, Elliott J, Whitaker MD, Tzoulaki I, Vermeulen R, et al. Risk factors for positive and negative COVID-19 tests: a cautious and in-depth analysis of UK biobank data. *Int J Epidemiol.* 2020;49(5):1454-67.
235. Patel JA, Nielsen FBH, Badiani AA, Assi S, Unadkat VA, Patel B, et al. Poverty, inequality and COVID-19: the forgotten vulnerable. *Public Health.* 2020;183:110-1.
236. Cohen J, Rodgers YVM. Contributing factors to personal protective equipment shortages during the COVID-19 pandemic. *Prev Med.* 2020;141:106263.
237. Who.int [Internet]. Vaccine Equity. World Health Organisation. [cited 10 January 2022]. Available from: <https://www.who.int/campaigns/vaccine-equity>
238. parliament.uk [Internet]. Coronavirus: lessons learned to date. The House of Commons, Science and Technology Committee, and Health and Social Care Committee. [12 October 2021; cited 10 January 2022]. Available from: <https://publications.parliament.uk/pa/cm5802/cmselect/cmsctech/92/9203.htm>
239. Ball P. The lightning-fast quest for COVID vaccines - and what it means for other diseases. *Nature.* 2021;589(7840):16-8.
240. Summers J, Cheng HY, Lin HH, Barnard LT, Kvalsvig A, Wilson N, et al. Potential lessons from the Taiwan and New Zealand health responses to the COVID-19 pandemic. *Lancet Reg Health West Pac.* 2020;4:100044.
241. Dagan N, Barda N, Kepten E, Miron O, Perchik S, Katz MA, et al. BNT162b2 mRNA Covid-19 Vaccine in a Nationwide Mass Vaccination Setting. *N Engl J Med.* 2021;384(15):1412-23.
242. Lopez Bernal J, Andrews N, Gower C, Gallagher E, Simmons R, Thelwall S, et al. Effectiveness of Covid-19 Vaccines against the B.1.617.2 (Delta) Variant. *N Engl J Med.* 2021;385(7):585-94.
243. Abu-Raddad LJ, Chemaitelly H, Butt AA, National Study Group for C-V. Effectiveness of the BNT162b2 Covid-19 Vaccine against the B.1.1.7 and B.1.351 Variants. *N Engl J Med.* 2021;385(2):187-9.
244. Chung H, He S, Nasreen S, Sundaram ME, Buchan SA, Wilson SE, et al. Effectiveness of BNT162b2 and mRNA-1273 covid-19 vaccines against symptomatic SARS-CoV-2 infection and severe covid-19 outcomes in Ontario, Canada: test negative design study. *BMJ.* 2021;374:n1943.
245. Nasreen S, Chung H, He S, Brown KA, Gubbay JB, Buchan SA, et al. Effectiveness of mRNA and ChAdOx1 COVID-19 vaccines against symptomatic SARS CoV-2 infection and severe outcomes with variants of concern in Ontario. *MedRxiv [Preprint].* 2021.

- 1  
2  
3  
4  
5  
6  
7  
8  
9  
10  
11  
12  
13  
14  
15  
16  
17  
18  
19  
20  
21  
22  
23  
24  
25  
26  
27  
28  
29  
30  
31  
32  
33  
34  
35  
36  
37  
38  
39  
40  
41  
42  
43  
44  
45  
46  
47  
48  
49  
50  
51  
52  
53  
54  
55  
56  
57  
58  
59  
60
246. Puranik A, Lenehan PJ, Silvert E, Niesen MJM, Corchado-Garcia J, O'Horo JC, et al. Comparison of two highly-effective mRNA vaccines for COVID-19 during periods of Alpha and Delta variant prevalence. *MedRxiv [Preprint]*. 2021.
  247. Julia Stowe, Nick Andrews, Charlotte Gower, Eileen Gallagher, Lara Utsi, Ruth Simmons, et al. Effectiveness of COVID-19 vaccines against hospital admission with the Delta (B.1.617.2) variant. *Public Health England [preprint]*. 2021.
  248. Lopez Bernal J, Andrews N, Gower C, Robertson C, Stowe J, Tessier E, et al. Effectiveness of the Pfizer-BioNTech and Oxford-AstraZeneca vaccines on covid-19 related symptoms, hospital admissions, and mortality in older adults in England: test negative case-control study. *BMJ*. 2021;373:n1088.
  249. Skowronski DM, Setayeshgar S, Zou M, Prystajecky N, Tyson JR, Galanis E, et al. Single-dose mRNA vaccine effectiveness against SARS-CoV-2, including Alpha and Gamma variants: a test-negative design in adults 70 years and older in British Columbia, Canada. *Clin Infect Dis*. 2021.
  250. Carazo S, Talbot D, Boulianne N, Brisson M, Gilca R, Deceuninck G, et al. Single-dose mRNA vaccine effectiveness against SARS-CoV-2 in healthcare workers extending 16 weeks post-vaccination: a test-negative design from Quebec, Canada. *Clin Infect Dis*. 2021.
  251. Charmet T, Schaeffer L, Grant R, Galmiche S, Cheny O, Von Platen C, et al. Impact of original, B.1.1.7, and B.1.351/P.1 SARS-CoV-2 lineages on vaccine effectiveness of two doses of COVID-19 mRNA vaccines: Results from a nationwide case-control study in France. *Lancet Reg Health Eur*. 2021;8:100171.
  252. Tang P, Hasan MR, Chemaitelly H, Yassine HM, Benslimane FM, Al Khatib HA, et al. BNT162b2 and mRNA-1273 COVID-19 vaccine effectiveness against the SARS-CoV-2 Delta variant in Qatar. *Nat Med*. 2021;27(12):2136-43.
  253. Hall VJ, Foulkes S, Saei A, Andrews N, Oguti B, Charlett A, et al. COVID-19 vaccine coverage in health-care workers in England and effectiveness of BNT162b2 mRNA vaccine against infection (SIREN): a prospective, multicentre, cohort study. *Lancet*. 2021;397(10286):1725-35.
  254. Haas EJ, Angulo FJ, McLaughlin JM, Anis E, Singer SR, Khan F, et al. Impact and effectiveness of mRNA BNT162b2 vaccine against SARS-CoV-2 infections and COVID-19 cases, hospitalisations, and deaths following a nationwide vaccination campaign in Israel: an observational study using national surveillance data. *Lancet*. 2021;397(10287):1819-29.
  255. Nanduri S, Pilishvili T, Derado G, Soe MM, Dollard P, Wu H, et al. Effectiveness of Pfizer-BioNTech and Moderna Vaccines in Preventing SARS-CoV-2 Infection Among Nursing Home Residents Before and During Widespread Circulation of the SARS-CoV-2 B.1.617.2 (Delta) Variant - National Healthcare Safety Network, March 1-August 1, 2021. *MMWR Morb Mortal Wkly Rep*. 2021;70(34):1163-6.
  256. Fowlkes A, Gaglani M, Groover K, Thiese MS, Tyner H, Ellingson K, et al. Effectiveness of COVID-19 Vaccines in Preventing SARS-CoV-2 Infection Among Frontline Workers Before and During B.1.617.2 (Delta) Variant Predominance - Eight U.S. Locations, December 2020-August 2021. *MMWR Morb Mortal Wkly Rep*. 2021;70(34):1167-9.



- 1  
2  
3  
4  
5  
6  
7  
8  
9  
10  
11  
12  
13  
14  
15  
16  
17  
18  
19  
20  
21  
22  
23  
24  
25  
26  
27  
28  
29  
30  
31  
32  
33  
34  
35  
36  
37  
38  
39  
40  
41  
42  
43  
44  
45  
46  
47  
48  
49  
50  
51  
52  
53  
54  
55  
56  
57  
58  
59  
60
257. Lefevre B, Tondeur L, Madec Y, Grant R, Lina B, van der Werf S, et al. Beta SARS-CoV-2 variant and BNT162b2 vaccine effectiveness in long-term care facilities in France. *Lancet Healthy Longev.* 2021.
  258. Pouwels KB, Pritchard E, Matthews PC, Stoesser N, Eyre DW, Vihta K-D, et al. Effect of Delta variant on viral burden and vaccine effectiveness against new SARS-CoV-2 infections in the UK. *Nature Medicine.* 2021.
  259. Williams C, Al-Bargash D, Macalintal C, Stuart R, Seth A, Latham J, et al. COVID-19 Outbreak Associated with a SARS-CoV-2 P.1 Lineage in a Long-Term Care Home after Implementation of a Vaccination Program - Ontario, April-May 2021. *Clin Infect Dis.* 2021.
  260. Fabiani M, Ramigni M, Gobetto V, Mateo-Urdiales A, Pezzotti P, Piovesan C. Effectiveness of the Comirnaty (BNT162b2, BioNTech/Pfizer) vaccine in preventing SARS-CoV-2 infection among healthcare workers, Treviso province, Veneto region, Italy, 27 December 2020 to 24 March 2021. *Euro Surveill.* 2021;26(17).
  261. Thomas SJ, Moreira ED, Jr., Kitchin N, Absalon J, Gurtman A, Lockhart S, et al. Safety and Efficacy of the BNT162b2 mRNA Covid-19 Vaccine through 6 Months. *N Engl J Med.* 2021;385(19):1761-73.
  262. Angel Y, Spitzer A, Henig O, Saiag E, Sprecher E, Padova H, et al. Association Between Vaccination With BNT162b2 and Incidence of Symptomatic and Asymptomatic SARS-CoV-2 Infections Among Health Care Workers. *JAMA.* 2021;325(24):2457-65.
  263. Bjork J, Inghammar M, Moghaddassi M, Rasmussen M, Malmqvist U, Kahn F. High level of protection against COVID-19 after two doses of BNT162b2 vaccine in the working age population - first results from a cohort study in Southern Sweden. *Infect Dis (Lond).* 2022;54(2):128-33.
  264. Cabezas C, Coma E, Mora-Fernandez N, Li X, Martinez-Marcos M, Fina F, et al. Associations of BNT162b2 vaccination with SARS-CoV-2 infection and hospital admission and death with covid-19 in nursing homes and healthcare workers in Catalonia: prospective cohort study. *BMJ.* 2021;374:n1868.
  265. Emborg H-D, Valentiner-Branth P, Schelde AB, Nielsen KF, Gram MA, Moustsen-Helms IR, et al. Vaccine effectiveness of the BNT162b2 mRNA COVID-19 vaccine against RT-PCR confirmed SARS-CoV2 infections, hospitalisations and mortality in prioritised risk groups. *MedRxiv [Preprint].* 2021.
  266. Gras-Valenti P, Chico-Sanchez P, Algado-Selles N, Jimenez-Sepulveda NJ, Gomez-Sotero IL, Fuster-Perez M, et al. [Effectiveness of the first dose of BNT162b2 vaccine to preventing covid-19 in healthcare personnel.]. *Rev Esp Salud Publica.* 2021;95.
  267. Mason TFD, Whitston M, Hodgson J, Watkinson RE, Lau YS, Abdulrazeg O, et al. Effects of BNT162b2 mRNA vaccine on COVID-19 infection and hospitalisation amongst older people: matched case control study for England. *BMC Med.* 2021;19(1):275.
  268. Monge S, Olmedo C, Alejos B, Lapena MF, Sierra MJ, Limia A, et al. Direct and Indirect Effectiveness of mRNA Vaccination against Severe Acute Respiratory Syndrome Coronavirus 2 in Long-Term Care Facilities, Spain. *Emerg Infect Dis.* 2021;27(10):2595-603.

- 1  
2  
3  
4  
5  
6  
7  
8  
9  
10  
11  
12  
13  
14  
15  
16  
17  
18  
19  
20  
21  
22  
23  
24  
25  
26  
27  
28  
29  
30  
31  
32  
33  
34  
35  
36  
37  
38  
39  
40  
41  
42  
43  
44  
45  
46  
47  
48  
49  
50  
51  
52  
53  
54  
55  
56  
57  
58  
59  
60
269. Pritchard E, Matthews PC, Stoesser N, Eyre DW, Gethings O, Vihta KD, et al. Impact of vaccination on new SARS-CoV-2 infections in the United Kingdom. *Nat Med.* 2021;27(8):1370-8.
  270. Regev-Yochay G, Amit S, Bergwerk M, Lipsitch M, Leshem E, Kahn R, et al. Decreased infectivity following BNT162b2 vaccination: A prospective cohort study in Israel. *Lancet Reg Health Eur.* 2021;7:100150.
  271. Shrotri M, Krutikov M, Palmer T, Giddings R, Azmi B, Subbarao S, et al. Vaccine effectiveness of the first dose of ChAdOx1 nCoV-19 and BNT162b2 against SARS-CoV-2 infection in residents of long-term care facilities in England (VIVALDI): a prospective cohort study. *Lancet Infect Dis.* 2021;21(11):1529-38.
  272. Swift MD, Breeher LE, Tande AJ, Tommaso CP, Hainy CM, Chu H, et al. Effectiveness of Messenger RNA Coronavirus Disease 2019 (COVID-19) Vaccines Against Severe Acute Respiratory Syndrome Coronavirus 2 (SARS-CoV-2) Infection in a Cohort of Healthcare Personnel. *Clin Infect Dis.* 2021;73(6):e1376-e9.
  273. Thompson MG, Burgess JL, Naleway AL, Tyner H, Yoon SK, Meece J, et al. Prevention and Attenuation of Covid-19 with the BNT162b2 and mRNA-1273 Vaccines. *N Engl J Med.* 2021;385(4):320-9.
  274. Freck RW, Jr., Klein NP, Kitchin N, Gurtman A, Absalon J, Lockhart S, et al. Safety, Immunogenicity, and Efficacy of the BNT162b2 Covid-19 Vaccine in Adolescents. *N Engl J Med.* 2021;385(3):239-50.
  275. June Choe Y, Yi S, Hwang I, Kim J, Park YJ, Cho E, et al. Safety and effectiveness of BNT162b2 mRNA Covid-19 vaccine in adolescents. *Vaccine.* 2021.
  276. Lutrick K, Rivers P, Yoo YM, Grant L, Hollister J, Jovel K, et al. Interim Estimate of Vaccine Effectiveness of BNT162b2 (Pfizer-BioNTech) Vaccine in Preventing SARS-CoV-2 Infection Among Adolescents Aged 12-17 Years - Arizona, July-December 2021. *MMWR Morb Mortal Wkly Rep.* 2021;70(5152):1761-5.
  277. Glatman-Freedman A, Bromberg M, Dichtiar R, Hershkovitz Y, Keinan-Boker L. The BNT162b2 vaccine effectiveness against new COVID-19 cases and complications of breakthrough cases: A nation-wide retrospective longitudinal multiple cohort analysis using individualised data. *EBioMedicine.* 2021;72:103574.
  278. Pilishvili T, Fleming-Dutra KE, Farrar JL, Gierke R, Mohr NM, Talan DA, et al. Interim Estimates of Vaccine Effectiveness of Pfizer-BioNTech and Moderna COVID-19 Vaccines Among Health Care Personnel - 33 U.S. Sites, January-March 2021. *MMWR Morb Mortal Wkly Rep.* 2021;70(20):753-8.
  279. Martinez-Baz I, Miqueleiz A, Casado I, Navascues A, Trobajo-Sanmartin C, Burgui C, et al. Effectiveness of COVID-19 vaccines in preventing SARS-CoV-2 infection and hospitalisation, Navarre, Spain, January to April 2021. *Euro Surveill.* 2021;26(21).
  280. Vasileiou E, Simpson CR, Shi T, Kerr S, Agrawal U, Akbari A, et al. Interim findings from first-dose mass COVID-19 vaccination roll-out and COVID-19 hospital admissions in Scotland: a national prospective cohort study. *Lancet.* 2021;397(10285):1646-57.
  281. [ecdc.europa.eu](https://ecdc.europa.eu) [Internet]. Interim analysis of COVID-19 vaccine effectiveness against Severe Acute Respiratory Infection due to laboratory-confirmed SARS-CoV-2 among individuals aged 50 years and older, ECDC multi-country study – first update. European Centre for Disease Prevention and Control. [20 January 2022; cited 24

- 1  
2  
3 January 2022]. Available from: [https://www.ecdc.europa.eu/en/publications-](https://www.ecdc.europa.eu/en/publications-data/interim-analysis-covid-19-vaccine-effectiveness-against-severe-acute-respiratory)  
4 data/interim-analysis-covid-19-vaccine-effectiveness-against-severe-acute-respiratory  
5  
6 282. Rosenberg ES, Dorabawila V, Easton D, Bauer UE, Kumar J, Hoen R, et al.  
7 Covid-19 Vaccine Effectiveness in New York State. *N Engl J Med.* 2022;386(2):116-  
8 27.  
9  
10 283. Olson SM, Newhams MM, Halasa NB, Price AM, Boom JA, Sahni LC, et al.  
11 Effectiveness of BNT162b2 Vaccine against Critical Covid-19 in Adolescents. *N Engl*  
12 *J Med.* 2022.  
13  
14 284. Zambrano LD, Newhams MM, Olson SM, Halasa NB, Price AM, Boom JA, et  
15 al. Effectiveness of BNT162b2 (Pfizer-BioNTech) mRNA Vaccination Against  
16 Multisystem Inflammatory Syndrome in Children Among Persons Aged 12-18 Years -  
17 United States, July-December 2021. *MMWR Morb Mortal Wkly Rep.* 2022;71(2):52-  
18 8.  
19  
20 285. Emary KRW, Golubchik T, Aley PK, Ariani CV, Angus B, Bibi S, et al.  
21 Efficacy of ChAdOx1 nCoV-19 (AZD1222) vaccine against SARS-CoV-2 variant of  
22 concern 202012/01 (B.1.1.7): an exploratory analysis of a randomised controlled trial.  
23 *Lancet.* 2021;397(10282):1351-62.  
24  
25 286. [astrazeneca.com](https://www.astrazeneca.com) [Internet]. AZD1222 US Phase III trial met primary efficacy  
26 endpoint in preventing COVID-19 at interim analysis. AstraZeneca. [22 March 2021;  
27 cited 15 October 2021]. Available from: [https://www.astrazeneca.com/media-](https://www.astrazeneca.com/media-centre/press-releases/2021/astrazeneca-us-vaccine-trial-met-primary-endpoint.html)  
28 [centre/press-releases/2021/astrazeneca-us-vaccine-trial-met-primary-endpoint.html](https://www.astrazeneca.com/media-centre/press-releases/2021/astrazeneca-us-vaccine-trial-met-primary-endpoint.html)  
29  
30 287. Voysey M, Clemens SAC, Madhi SA, Weckx LY, Folegatti PM, Aley PK, et  
31 al. Safety and efficacy of the ChAdOx1 nCoV-19 vaccine (AZD1222) against SARS-  
32 CoV-2: an interim analysis of four randomised controlled trials in Brazil, South Africa,  
33 and the UK. *Lancet.* 2021;397(10269):99-111.  
34  
35 288. Madhi SA, Baillie V, Cutland CL, Voysey M, Koen AL, Fairlie L, et al. Efficacy  
36 of the ChAdOx1 nCoV-19 Covid-19 Vaccine against the B.1.351 Variant. *N Engl J*  
37 *Med.* 2021;384(20):1885-98.  
38  
39 289. Pramod S, Govindan D, Ramasubramani P, Kar SS, Aggarwal R, Manoharan  
40 N, et al. Effectiveness of Covishield vaccine in preventing Covid-19 – A test-negative  
41 case control study. *MedRxiv [Preprint].* 2021.  
42  
43 290. Falsey AR, Sobieszczyk ME, Hirsch I, Sproule S, Robb ML, Corey L, et al.  
44 Phase 3 Safety and Efficacy of AZD1222 (ChAdOx1 nCoV-19) Covid-19 Vaccine. *N*  
45 *Engl J Med.* 2021;385(25):2348-60.  
46  
47 291. Clemens SAC, Folegatti PM, Emary KRW, Weckx LY, Ratcliff J, Bibi S, et al.  
48 Efficacy of ChAdOx1 nCoV-19 (AZD1222) vaccine against SARS-CoV-2 lineages  
49 circulating in Brazil. *Nat Commun.* 2021;12(1):5861.  
50  
51 292. Voysey M, Costa Clemens SA, Madhi SA, Weckx LY, Folegatti PM, Aley PK,  
52 et al. Single-dose administration and the influence of the timing of the booster dose on  
53 immunogenicity and efficacy of ChAdOx1 nCoV-19 (AZD1222) vaccine: a pooled  
54 analysis of four randomised trials. *Lancet.* 2021;397(10277):881-91.  
55  
56 293. Bhattacharya A, Ranjan P, Ghosh T, Agarwal H, Seth S, Maher GT, et al.  
57 Evaluation of the dose-effect association between the number of doses and duration  
58 since the last dose of COVID-19 vaccine, and its efficacy in preventing the disease and  
59 reducing disease severity: A single centre, cross-sectional analytical study from India.  
60 *Diabetes Metab Syndr.* 2021;15(5):102238.

- 1
  - 2
  - 3
  - 4
  - 5
  - 6
  - 7
  - 8
  - 9
  - 10
  - 11
  - 12
  - 13
  - 14
  - 15
  - 16
  - 17
  - 18
  - 19
  - 20
  - 21
  - 22
  - 23
  - 24
  - 25
  - 26
  - 27
  - 28
  - 29
  - 30
  - 31
  - 32
  - 33
  - 34
  - 35
  - 36
  - 37
  - 38
  - 39
  - 40
  - 41
  - 42
  - 43
  - 44
  - 45
  - 46
  - 47
  - 48
  - 49
  - 50
  - 51
  - 52
  - 53
  - 54
  - 55
  - 56
  - 57
  - 58
  - 59
  - 60
294. Malathi Murugesan, Prasad Mathews, Hema Paul, Rajiv Karthik, Joy John Mammen, Rupali. P. Protective Effect Conferred by Prior Infection and Vaccination on COVID-19 in a Healthcare Worker Cohort in South India. SSRN [Preprint]. 2021.
295. Alencar CH, Cavalcanti LPG, Almeida MM, Barbosa PPL, Cavalcante KKS, Melo DN, et al. High Effectiveness of SARS-CoV-2 Vaccines in Reducing COVID-19-Related Deaths in over 75-Year-Olds, Ceara State, Brazil. *Trop Med Infect Dis.* 2021;6(3).
296. Cerqueira-Silva T, Oliveira Vda, Pescarini J, Bertoldo Júnior J, Machado TM, Flores-Ortiz R, et al. The effectiveness of Vaxzevria and CoronaVac vaccines: A nationwide longitudinal retrospective study of 61 million Brazilians (VigiVac-COVID19). . MedRxiv [Preprint]. 2021.
297. Otavio T Ranzani, Rogério dos Santos Leite, Larissa Domingues Castilho, Crhistinne Cavalheiro Maymone Gonçalves, Geraldo Resende, Rosana Leite de Melo, et al. Vaccine effectiveness of Ad26.COVS against symptomatic COVID-19 and clinical outcomes in Brazil: a test-negative study design. MedRxiv [Preprint]. 2021.
298. Corchado-Garcia J, Puyraimond-Zemmour D, Hughes T, Cristea-Platon T, Lenehan P, Pawlowski C, et al. Real-world effectiveness of Ad26.COVS adenoviral vector vaccine for COVID-19. MedRxiv [Preprint]. 2021.
299. Barlow RS, Jian K, Larson L. Effectiveness of COVID-19 Vaccines Against SARS-CoV-2 Infection During a Delta Variant Epidemic Surge in Multnomah County, Oregon, July 2021. MedRxiv [Preprint]. 2021.
300. Polinski JM, Weckstein AR, Batech M, Kabelac C, Kamath T, Harvey R, et al. Effectiveness of the Single-Dose Ad26.COVS COVID Vaccine. MedRxiv [Preprint]. 2021.
301. Corchado-Garcia J, Zemmour D, Hughes T, Bandi H, Cristea-Platon T, Lenehan P, et al. Analysis of the Effectiveness of the Ad26.COVS Adenoviral Vector Vaccine for Preventing COVID-19. *JAMA Netw Open.* 2021;4(11):e2132540.
302. Chin ET, Leidner D, Zhang Y, Long E, Prince L, Li Y, et al. Effectiveness of the mRNA-1273 Vaccine during a SARS-CoV-2 Delta Outbreak in a Prison. *N Engl J Med.* 2021;385(24):2300-1.
303. Gupta K, O'Brien WJ, Bellino P, Linsenmeyer K, Doshi SJ, Sprague RS, et al. Incidence of SARS-CoV-2 Infection in Health Care Workers After a Single Dose of mRNA-1273 Vaccine. *JAMA Netw Open.* 2021;4(6):e2116416.
304. Chemaitelly H, Yassine HM, Benslimane FM, Al Khatib HA, Tang P, Hasan MR, et al. mRNA-1273 COVID-19 vaccine effectiveness against the B.1.1.7 and B.1.351 variants and severe COVID-19 disease in Qatar. *Nat Med.* 2021;27(9):1614-21.
305. Herlihy R, Bamberg W, Burakoff A, Alden N, Severson R, Bush E, et al. Rapid Increase in Circulation of the SARS-CoV-2 B.1.617.2 (Delta) Variant - Mesa County, Colorado, April-June 2021. *MMWR Morb Mortal Wkly Rep.* 2021;70(32):1084-7.
306. Bruxvoort KJ, Sy LS, Qian L, Ackerson BK, Luo Y, Lee GS, et al. Real-world effectiveness of the mRNA-1273 vaccine against COVID-19: Interim results from a prospective observational cohort study. *Lancet Reg Health Am.* 2021:100134.
307. Bruxvoort KJ, Sy LS, Qian L, Ackerson BK, Luo Y, Lee GS, et al. Effectiveness of mRNA-1273 against delta, mu, and other emerging variants of SARS-CoV-2: test negative case-control study. *BMJ.* 2021;375:e068848.

- 1  
2  
3  
4  
5  
6  
7  
8  
9  
10  
11  
12  
13  
14  
15  
16  
17  
18  
19  
20  
21  
22  
23  
24  
25  
26  
27  
28  
29  
30  
31  
32  
33  
34  
35  
36  
37  
38  
39  
40  
41  
42  
43  
44  
45  
46  
47  
48  
49  
50  
51  
52  
53  
54  
55  
56  
57  
58  
59  
60
308. El Sahly HM, Baden LR, Essink B, Doblecki-Lewis S, Martin JM, Anderson EJ, et al. Efficacy of the mRNA-1273 SARS-CoV-2 Vaccine at Completion of Blinded Phase. *N Engl J Med*. 2021;385(19):1774-85.
  309. Li XN, Huang Y, Wang W, Jing QL, Zhang CH, Qin PZ, et al. Effectiveness of inactivated SARS-CoV-2 vaccines against the Delta variant infection in Guangzhou: a test-negative case-control real-world study. *Emerg Microbes Infect*. 2021;10(1):1751-9.
  310. Min Kang, Yao Yi, Yan Li, Limei Sun, Aiping Deng, Ting Hu, et al. Effectiveness of Inactivated COVID-19 Vaccines Against COVID-19 Pneumonia and Severe Illness Caused by the B.1.617.2 (Delta) Variant: Evidence from an Outbreak in Guangdong, China. SSRN [Preprint]. 2021.
  311. Silva-Valencia Javier, Soto-Becerra Percy, Escobar-Agreda Stefan, Fernández-Navarro Manuel, Moscoso-Porras Miguel, Solari Lely, et al. Effectiveness of the BBIPB-CorV Vaccine in Preventing Infection and Death in Health Care Workers in Peru 2021. SSRN [Preprint]. 2021.
  312. Al Kaabi N, Zhang Y, Xia S, Yang Y, Al Qahtani MM, Abdulrazzaq N, et al. Effect of 2 Inactivated SARS-CoV-2 Vaccines on Symptomatic COVID-19 Infection in Adults: A Randomized Clinical Trial. *JAMA*. 2021;326(1):35-45.
  313. Farida Ismail AlHosani, Anderson Eduardo Stanciole, Bashir Aden, Andrey Timoshkin, Omar Najim, Walid Abbas Zaher, et al. Sinopharm's BBIPB-CorV vaccine effectiveness on preventing hospital admission and deaths: results from a retrospective study in the Emirate of Abu Dhabi, United Arab Emirates (UAE). SSRN [Preprint]. 2021.
  314. AlQahtani M, Bhattacharyya S, Alawadi A, Mahmeed HA, Sayed JA, Justman J, et al. Morbidity and mortality from COVID-19 postvaccination breakthrough infections in association with vaccines and the emergence of variants in Bahrain. *Research Square* [Preprint]. 2021.
  315. Jara A, Undurraga EA, Gonzalez C, Paredes F, Fontecilla T, Jara G, et al. Effectiveness of an Inactivated SARS-CoV-2 Vaccine in Chile. *N Engl J Med*. 2021;385(10):875-84.
  316. Ranzani OT, Hitchings MDT, Dorion M, D'Agostini TL, de Paula RC, de Paula OFP, et al. Effectiveness of the CoronaVac vaccine in older adults during a gamma variant associated epidemic of covid-19 in Brazil: test negative case-control study. *BMJ*. 2021;374:n2015.
  317. Hitchings MDT, Ranzani OT, Torres MSS, de Oliveira SB, Almiron M, Said R, et al. Effectiveness of CoronaVac among healthcare workers in the setting of high SARS-CoV-2 Gamma variant transmission in Manaus, Brazil: A test-negative case-control study. *Lancet Reg Health Am*. 2021;1:100025.
  318. Enny S. Paixao, Kerry LM Wong, Flavia Jôse Oliveira Alves, Vinicius de Araújo Oliveira, Thiago Cerqueira-Silva, Juracy Bertoldo Júnior, et al. Effectiveness of the CoronaVac vaccine in prevention of symptomatic and progression to severe Covid-19 in pregnant women in Brazil. SSRN [Preprint]. 2021.
  319. Hitchings MDT, Ranzani OT, Scaramuzzini Torres MS, de Oliveira SB, Almiron M, Said R, et al. Effectiveness of CoronaVac in the setting of high SARS-CoV-2 P.1 variant transmission in Brazil: A test-negative case-control study. *MedRxiv* [Preprint]. 2021.

- 1  
2  
3 320. Tanriover MD, Doganay HL, Akova M, Guner HR, Azap A, Akhan S, et al.  
4 Efficacy and safety of an inactivated whole-virion SARS-CoV-2 vaccine (CoronaVac):  
5 interim results of a double-blind, randomised, placebo-controlled, phase 3 trial in  
6 Turkey. *Lancet*. 2021;398(10296):213-22.  
7  
8 321. Palacios R, Batista AP, Albuquerque CSN, Patiño EG, Santos JdP, Tilli Reis  
9 Pessoa Conde M, et al. Efficacy and Safety of a COVID-19 Inactivated Vaccine in  
10 Healthcare Professionals in Brazil: The PROFISCOV Study. SSRN [Preprint]. 2021.  
11  
12 322. Ella R, Reddy S, Blackwelder W, Potdar V, Yadav P, Sarangi V, et al. Efficacy,  
13 safety, and lot-to-lot immunogenicity of an inactivated SARS-CoV-2 vaccine  
14 (BBV152): interim results of a randomised, double-blind, controlled, phase 3 trial.  
15 *Lancet*. 2021;398(10317):2173-84.  
16  
17 323. Desai D, Khan AR, Soneja M, Mittal A, Naik S, Kodan P, et al. Effectiveness  
18 of an inactivated virus-based SARS-CoV-2 vaccine, BBV152, in India: a test-negative,  
19 case-control study. *Lancet Infect Dis*. 2021.  
20  
21 324. Malhotra S, Mani K, Lodha R, Bakhshi S, Mathur VP, Gupta P, et al. SARS-  
22 CoV-2 Reinfection Rate and Estimated Effectiveness of the Inactivated Whole Virion  
23 Vaccine BBV152 Against Reinfection Among Health Care Workers in New Delhi,  
24 India. *JAMA Netw Open*. 2022;5(1):e2142210.  
25  
26 325. Heath PT, Galiza EP, Baxter DN, Boffito M, Browne D, Burns F, et al. Safety  
27 and Efficacy of NVX-CoV2373 Covid-19 Vaccine. *N Engl J Med*. 2021;385(13):1172-  
28 83.  
29  
30 326. Dunkle LM, Kotloff KL, Gay CL, Anez G, Adelglass JM, Barrat Hernandez  
31 AQ, et al. Efficacy and Safety of NVX-CoV2373 in Adults in the United States and  
32 Mexico. *N Engl J Med*. 2021.  
33  
34 327. Toback S, Galiza E, Cosgrove C, Galloway J, Goodman AL, Swift PA, et al.  
35 Safety, immunogenicity, and efficacy of a COVID-19 vaccine (NVX-CoV2373) co-  
36 administered with seasonal influenza vaccines: an exploratory substudy of a  
37 randomised, observer-blinded, placebo-controlled, phase 3 trial. *Lancet Respir Med*.  
38 2021.  
39  
40 328. Shinde V, Bhikha S, Hoosain Z, Archary M, Bhorat Q, Fairlie L, et al. Efficacy  
41 of NVX-CoV2373 Covid-19 Vaccine against the B.1.351 Variant. *N Engl J Med*.  
42 2021;384(20):1899-909.  
43  
44  
45  
46  
47  
48  
49  
50  
51  
52  
53  
54  
55  
56  
57  
58  
59  
60

## **COVID-19: Virology, variants, and vaccinations**

**Keywords:** Covid-19, Coronavirus, Virology, SARS-CoV-2 variants, Vaccines.

**Megan Young<sup>1†</sup>, Harry Crook<sup>1†</sup>, Janet Scott<sup>2</sup>, Paul Edison<sup>1,3,\*</sup>**

<sup>1</sup> Faculty of Medicine, Imperial College London, London, UK.

<sup>2</sup> Medical Research Council-University of Glasgow Centre for Virus Research, University of Glasgow, UK

<sup>3</sup> School of Medicine, Cardiff University, Cardiff, UK.

† Both authors contributed equally to the manuscript

\*Corresponding author:

Dr Paul Edison, MD, MRCP, PhD, FRCP, FRCPI,

Clinical Senior Lecturer, Imperial College London and Honorary Professor, Cardiff University, UK

Division of Neurology, Faculty of Medicine, Imperial College London

Level 2, Commonwealth Building,

Hammersmith Campus, Imperial College London,

Du Cane Road, London, W12 0NN, UK

Tel: +442075941081

E-mail: paul.edison@imperial.ac.uk

No authors have any competing interests.

## **Abstract**

As of 25<sup>th</sup> January 2022, there have been over 349 million confirmed cases of COVID-19, with over 5.59 million confirmed deaths associated with the SARS-CoV-2 virus. The COVID-19 pandemic has prompted an extensive, global effort to study the molecular evolution of the virus and develop vaccines to combat its spread. Although rigorous determination of SARS-CoV-2 infectivity remains elusive, due to the continuous evolution of the virus, steps have been made to understand its genome, structure, and emerging genetic mutations. The SARS-CoV-2 genome is composed of ~~a number of several~~ open reading frames (ORFs) and structural proteins, including the spike protein, which is essential for entry into host cells. As of 25<sup>th</sup> January 2022, the WHO reports five variants of concern (VOC) two variants of interest (VOI) and three variants under monitoring (VUM). The mutations harboured in these variants confer an increased transmissibility, severity of disease, and escape from neutralising antibodies compared to the primary strain. The current vaccine strategy, including booster doses, provides protection from severe disease. As of 24<sup>th</sup> January 2022, there are 33 approved vaccines in use in 197 countries. In this review, we discuss the genetics, structure and transmission methods of SARS-CoV-2 and its variants, highlighting how mutations provide enhanced abilities to spread and inflict disease. We also outline the vaccines currently in use around the world, providing evidence for the immunogenicity and effectiveness of each.

## **1. Introduction**

There are seven coronaviruses that infect humans, all belonging to either alpha- or beta-coronavirus subgroups, including 229E (alpha), NL63 (alpha), OC43 (beta), and HKU1 (beta)(1). Over the last two decades, three notable beta-coronaviruses, severe acute respiratory syndrome coronavirus (SARS-CoV) in 2002, Middle East respiratory syndrome coronavirus (MERS-CoV) in 2011, and most recently, severe acute respiratory syndrome 2 (SARS-CoV-2) in 2019, have emerged and caused severe illness resulting in debilitating disease and worldwide fatalities. SARS-CoV-2 is the pathogen responsible for the current Coronavirus 2019 (COVID-19) pandemic and has caused more than 5.59 million deaths in approximately two years and resulted in multisystem illness in several million people(2).

All viruses change and mutate over time, with most changes having little to no impact. However, some mutations may alter its pathogenic or transmission potential and could, therefore, increase disease severity or hinder the effectiveness of vaccines and therapeutic strategies. The World Health Organisation (WHO) (3) classify SARS-CoV-2 variants that increase transmissibility, disease severity or virulence, or decrease the effectiveness of public health measures, diagnostics, therapeutics, or vaccines as variants of concern (VOC). Variants with genetic changes that are predicted to enhance the virulence and transmissibility of the virus which have been identified to cause community transmission in multiple countries posing a possible risk to global public health are defined as variants of interest (VOI). Lastly, the WHO defines variants with genetic changes that are suspected to affect virus characteristics and have currently unclear phenotypic or epidemiological effects as variants under monitoring (VUM). VUM are not typically assigned a name until they are upgraded to VOI or VOC. The full working definitions of VOC, VOI and VUM can be found on the WHO 'tracking SARS-CoV-2 variants' website: [www.who.int/en/activities/tracking-SARS-CoV-2-variants/](http://www.who.int/en/activities/tracking-SARS-CoV-2-variants/)(3). As of 25<sup>th</sup> January 2022, the WHO reports five VOC; Alpha, Beta, Gamma, Delta and Omicron, two VOI;



1  
2  
3  
4  
5  
6  
7  
8  
9  
10  
11  
12  
13  
14  
15  
16  
17  
18  
19  
20  
21  
22  
23  
24  
25  
26  
27  
28  
29  
30  
31  
32  
33  
34  
35  
36  
37  
38  
39  
40  
41  
42  
43  
44  
45  
46  
47  
48  
49  
50  
51  
52  
53  
54  
55  
56  
57  
58  
59  
60

Lambda and Mu, and three VUM(3). Former VOC/VOI/VUM have been reclassified as ‘formerly monitored variants’ due to them either no longer circulating, having little impact on the epidemiological situation, or having no concerning properties(3). Since the beginning of the COVID-19 pandemic, the rapid development of effective COVID-19 vaccines has taken place around the world. As of 24<sup>th</sup> January 2022, there are 33 approved vaccines in use in 197 countries, with ten vaccines having gained emergency use listing approval from the WHO(4).

In this review, we provide an overview of the genome and structure of SARS-CoV-2, describing how these elements allow the virus to infect and replicate inside of host cells, before outlining how certain mutations harboured by SARS-CoV-2 variants enhance these abilities. Next, we examine the current state of vaccine development around the world and provide evidence of the effectiveness of booster doses.

## 2. Methods

We searched PubMed and Embase databases for COVID-19-related articles published between 1<sup>st</sup> January 2020 and 25<sup>th</sup> January 2022 and for general coronavirus-related articles published from 1<sup>st</sup> January 2000 onwards. Our search terms included SARS-CoV-2, COVID-19, and specific terms including virology, genome, variants, and vaccine. Additional, specific search terms are outlined in supplementary file 1. We performed further manual searching for additional articles and data using relevant databases, including who.int, gov.uk, and ecdc.europa.eu/en. Due to the rapidly evolving nature of the literature involving SARS-CoV-2, we also searched preprint databases including MedRxiv and BioRxiv. Due to the various topics addressed here, studies were selected through different criteria, details of which can be found in supplementary file 1. Overall, studies were selected based on quality and **impact factor of publishing journal reputation**, with real-world studies with large sample sizes of greatest interest.

## 3. Viral transmission, clinical presentation, and genetic susceptibility of COVID-19

SARS-CoV-2 is predominantly spread via respiratory droplet transmission, spreading between people through close contact, coughing, or sneezing. It has been documented that the virus can also spread through airborne transmission, fomite transmission, and via other modes, such as through biological material including urine and faeces, and through (5, 6). **The SARS-CoV-2 virus may survive on surfaces or suspended in air droplets for long periods of time. Indeed, on plastic, stainless steel, and glass surfaces, the half-life of the virus is around 5.3, 4.4, and 4.2 hours, respectively(7), with no difference seen between SARS-CoV-2 variants(8). Although SARS-CoV-2 can be detected on inanimate surfaces for hours and days, due to the evaporation of water droplets, the viruses’ living environment, the concentration of the virus plummets rapidly(9). Protective measures, including using personal protective equipment (PPE), maintaining indoor ventilation, and disinfecting hands and surfaces, can effectively limit the spread of SARS-CoV-2(10).**

Once inside the airways, SARS-CoV-2 can directly or indirectly infect ciliated, mucus-secreting, and club cells of bronchial epithelium, type 1 pneumocytes within the lungs, and the conjunctival mucosa(11). **The clinical presentation of COVID-19 is non-specific, heterogeneous, and infection can result in a wide spectrum of symptoms. Following an incubation period of 4-14 days, symptoms develop ranging from mild to severe disease and, in**

1  
2  
3 some cases, can result in death(12). The most common COVID-19 symptoms include fever,  
4 cough, dyspnoea, and fatigue(13, 14), while myalgia, gastrointestinal issues, cognitive deficits,  
5 and other symptoms are reported. Asymptomatic individuals can also test positive for COVID-  
6 19(15, 16). Although the entire population is susceptible to COVID-19 infection, some  
7 subgroups within the general population exist that are more susceptible to developing poorer  
8 clinical outcomes.  
9

10  
11 Risk factors associated with increased risk of hospitalisation, severe disease, and fatal  
12 outcome with COVID-19 have been identified. Older age(17-19), male sex(20, 21), non-white  
13 ethnicity(21, 22), comorbidities including diabetes, hypertension, and lung disease(18, 23-25),  
14 malignancy and immunodeficiency(26-28) have all been associated with more severe COVID-  
15 19. The duration of symptoms endured by COVID-19 patients, as well as the treatment they  
16 receive will also have profound influences on the severity of disease they experience and both  
17 the acute and long-term outcomes following recovery. The host genetic background is thought  
18 to have an influence on the susceptibility and severity of COVID-19, possibly explaining the  
19 broad spectrum of clinical manifestations that can develop in seemingly similar individuals. A  
20 study examining individuals with COVID-19 across numerous ancestry groups identified four  
21 gene loci associated with susceptibility to COVID-19; SLC6A20, RPL24, ABO, PLEKHA4,  
22 and nine associated with increased risk of severe COVID-19; LZTFL1, FOXP4, TMEM65,  
23 OAS1, KANSL1, TAC4, DPP9, RAVR1, and IFNAR2(29). Meanwhile, genome-wide  
24 association studies spanning across Europe, the United States (US), and the United Kingdom  
25 (UK) identified a gene cluster on chromosome three (chr3p21.31) as being strongly linked with  
26 susceptibility and severity of COVID-19(30, 31). Polymorphisms in the angiotensin-  
27 converting enzyme 2 (ACE2) receptor and transmembrane protease serine 2 (TMPRSS2) have  
28 also been shown to enhance SARS-CoV-2 viral entry(32, 33), with differential polymorphisms  
29 seen across ethnic populations, which may partly explain why certain ethnic groups are more  
30 susceptible to severe COVID-19. Increased ACE2 receptor levels have also been associated  
31 with other risk factors of COVID-19 including smoking and increasing age(34). The utilisation  
32 use -of polygenetic risk scores (PRS) may be useful in determining an individual's risk for  
33 developing severe disease caused by COVID-19(35). A PRS infers a person's risk of  
34 susceptibility to, or development of a certain disease based on the total number of genomic  
35 variations they possess. Determining PRS with the inclusion of comorbidities, such as chronic  
36 obstructive pulmonary disease(36), or other aspects, such as coagulation factors(37), may  
37 improve the usefulness of PRS in determining a person's risk of severe COVID-19.  
38  
39  
40  
41  
42  
43  
44  
45  
46  
47

#### 48 **4. Virology of SARS-CoV-2**

49 SARS-CoV-2 is a positive-stranded ribonucleic acid (RNA) virus belonging to  
50 Coronaviridae family. Coronaviruses, which have crownlike appearances, are the largest  
51 known RNA viruses and are thought to primarily infect vertebrates(38, 39). SARS-CoV-2  
52 belongs to the beta genus of the coronaviruses and has a genome varying from 29.8kb to 29.9kb  
53 in size(40). Human coronaviruses (HCoV) genomes consist of a variable number of open  
54 reading frames (ORFs). Following the typical 5'-3' order, the beginning two-thirds of the  
55 SARS-CoV-2 genome contains two ORFs, ORF1a and ORF1b which, inside the host cell, are  
56 translated at the rough endoplasmic reticulum into polyprotein 1a (pp1a) and polyprotein 1b  
57 (pp1ab), respectively(40). These polyproteins are cleaved into 16 non-structural proteins (nsp);  
58  
59  
60

1  
2  
3 nsp1-11, from pp1a and nsp12-16, from pp1ab. The proteolytic release of nsp1 occurs rapidly,  
4 which enables it to interfere with translation processes of the host cell by inducing cellular  
5 mRNA degradation(41-43). Nsp2-16 contain the viruses' replication and transcription complex  
6 (RTC) and encode multiple enzymes with many functions including, proteases, helicase,  
7 polymerase, exo- and endo-nuclease, N7- and 2'O-methyltransferases, and de-ubiquitination  
8 enzymes(44, 45). The final third of HCoV genomes contain genes that encode structural and  
9 accessory proteins. The four major structural proteins encoded here are the nucleocapsid (N),  
10 membrane (M), envelope (E), and spike glycoprotein (S) proteins(46, 47). The N protein is  
11 associated with the viral RNA genome and is involved in RNA synthesis regulation and  
12 interacts with the M protein during viral budding(39, 48). The M protein is important for viral  
13 assembly, it contains a short N-terminal domain that projects onto the external surface of the  
14 envelope and a long internal C terminus(39). The E protein function is largely unknown;  
15 however, along with the N and M proteins, it is required for viral assembly and release(47) .  
16 Lastly, the S protein gives coronaviruses their characteristic spikes that compose their  
17 crownlike appearance. This protein projects through the viral envelope, is heavily glycosylated,  
18 and regulates host cell membrane receptor binding and fusion of the viral and cellular  
19 membrane(49). The functions of the eleven accessory proteins encoded within the one-third  
20 closest to the 3' end of the SARS-CoV-2 genome are not fully understood. These accessory  
21 proteins are encoded by the ORF3a, ORF3b, ORF3c, ORF3d, ORF6, ORF7a, ORF7b, ORF8,  
22 ORF9b, ORF9c, and ORF10 genes. Some of these proteins, including ORF3b, ORF6, ORF7a  
23 and ORF8 are interferon antagonists which impair the host cell immune response(50-53), while  
24 ORF3a may promote virus release(54) and is involved in apoptosis of host cells through  
25 caspase-3 activation(55). ORF9b and ORF9c are known to suppress the host antiviral response  
26 by interacting with host cell organelles(56-58), while a clear understanding of the functions of  
27 ORF3c, ORF7b, and ORF10 remains elusive(59). **Figure 1** (A and B) depicts the genome and  
28 structure of SARS-CoV-2.

29  
30  
31  
32  
33  
34  
35  
36  
37  
38  
39  
40  
41  
42  
43  
44  
45  
46  
47  
48  
49  
50  
51  
52  
53  
54  
55  
56  
57  
58  
59  
60  
The S glycoprotein is composed of two functionally distinct subunits (S1 and S2) and is essential for viral entry into host cells. The N-terminal S1 domain of the protein contains the receptor-binding domain (RBD) that directly interacts with the ACE2 receptor on the host cell, the primary receptor that SARS-Cov-2 utilises for cell entry(60). The C-terminal S2 domain fuses the host and viral membranes to allow for entry of the viral genome into the host cell(61). The subunits of the trimeric S complex are either in a closed (pre-fusion stage) or open (post-fusion stage) conformation(62), with one subunit always in an open conformation to allow for ACE2 recognition and binding(63). The RBD itself consists of five anti-parallel  $\beta$ -strands surrounded by several  $\alpha$ -helices(64). From closed to open conformation, the RBD undergoes structural rearrangement whereby the globular head region rotates clockwise, which alters its electropotential surface(64). Once positioned, numerous residues within the RBD form either hydrogen bonds or salt bridges with residues of the ACE2 receptor, allowing for tight binding(65), while the concave structure of the RBD allows for three distinct binding regions(64). Following binding between the S protein and the host cell receptor, host cell proteases cleave the S protein, causing the release of the S2 domain which allows for fusion and cell entry(66). **Figure 1** (C and D) demonstrate the structure and function of the S protein.

The ACE2 receptor is expressed in numerous cell types throughout the human body, including in the lungs, oral and nasal mucosa, heart, gastrointestinal tract, kidneys, liver,

spleen, and brain(67), highlighting the widespread infection that SARS-CoV-2 can inflict. Meanwhile, TMPRSS2, a host cell protease, facilitates fusion of the viral and host cell membranes(68), and may play a role in the spread of the virus in the airways(68). Host cell cathepsin L may also aid in SARS-CoV-2 cell entry by cleaving the S protein(69). Indeed, a clinically approved protease inhibitor has been shown to block SARS-CoV-2 cell entry(70). **Figure 2** depicts the mechanism by which SARS-CoV-2 gains entry into and replicates inside host cells, and [overviews-summarises](#) the host cell immune response.

## **5. Variants of SARS-CoV-2**

Most viral mutations have a limited impact on the viruses' ability to infect, replicate, escape host immunity, and transmit, however, certain mutations may give a viral strain a competitive advantage and, through natural selection, give it the ability to become dominant. Many of the mutations observed in SARS-CoV-2 variants are found within the RBD or the N-terminal domain of the S protein, which alters the three-dimensional structure of the S protein. Not only can these changes affect the transmission abilities of the virus but can also allow it to better escape the immune response, including from neutralising antibodies either elicited through vaccine administration or natural infection.

The SARS-CoV-2 virus has mutated numerous times, with estimates suggesting that circulating lineages acquire nucleotide mutations at rates of around one to two mutations per month(71). The current method of identifying variants relies on the use of genomic testing such as whole genome sequencing, partial S-gene sequencing, or nucleic acid amplification technique (NAAT)-based assays(72). The aspects of different variants that most people experience, however, is the clinical symptoms they inflict. Certain variants induce a greater risk of severe disease and death, such as Alpha and Delta(73), while others are more likely to induce milder symptoms, such as Omicron(74, 75). Moreover, individual symptoms can differ between variants. For example, the Gamma variant is associated inflicting anosmia and dysgeusia(76), which is less commonly seen in Omicron infections. Moving forward, the clinical themes and symptoms associated with emerging variants should be elucidated rapidly in order for the so that the public and healthcare professionals can to rapidly identify possible cases of COVID-19.

The WHO have tracked and monitored SARS-CoV-2 variants since the COVID-19 pandemic began to identify VOCs. As of 25<sup>th</sup> January 2022, the WHO reports five VOC, two VOI, and three VUM(3) (**Table 1**). Herein, we report studies that compare SARS-CoV-2 variants to the 'primary' virus strain. 'Primary strain' refers to the strain of the virus that first emerged in Wuhan, China at the end of 2019 and spread around the world in the first wave of infections, which is often also referred to as the Wuhan-Hu-1, B.1, or wild-type strain.

## **5.1 Variants of concern**

### ***5.1.1 Alpha***

The Alpha SARS-CoV-2 variant, of the B.1.1.7 lineage, was first documented in the UK in September 2020 and classified as a VOC on 18<sup>th</sup> December 2020(3, 77). This variant contains S protein mutations which have potential biological effects. Firstly, the S protein residue 501, a key contact residue within the RBD, forms a portion of the binding loop in the contact region of the ACE2 receptor, forms a hydrogen bond with the Y41 residue of the ACE2

1  
2  
3 receptor, and stabilises the ACE2 K353 residue(65, 78, 79). Alpha harbours an N501Y  
4 mutation which increases the binding affinity of the RBD to the ACE2 receptor(80). Next, the  
5 P681H mutation contained within the Alpha variant is located immediately adjacent to the 682-  
6 685 furin cleavage site, at the interface of the S1 and S2 domains(81). The S1/S2 furin cleavage  
7 site prompts entry into respiratory epithelial cells and partly determines the transmissibility of  
8 the virus(82-84), while the P681H mutation makes the furin cleavage site less acidic, meaning  
9 it is more effectively recognised and cleaved(85, 86). Alpha also contains a D614G mutation,  
10 located within the S1/S2 furin cleavage site, which increases SARS-CoV-2 binding affinity to  
11 the ACE2 receptor and increases infectivity(87). Other mutations harboured within the Alpha  
12 variant enhance the ability of the virus to escape antibody detection, such as the two amino  
13 acid deletion at the sites 69-70 in the N-terminal domain of the S protein(88, 89), while other  
14 mutations demonstrate limited or no effects(90). In February 2021, viruses of the B.1.1.7  
15 lineage with the added S protein mutation E484K were identified, which may have threatened  
16 vaccine effectiveness due to the mutation conferring an increased resistance to neutralising  
17 vaccine-elicited and monoclonal antibodies(91). This mutation had limited effects, however,  
18 and variants containing it failed to dominate.

19  
20  
21  
22  
23  
24 Epidemiological studies explored the Alpha variant, with a [case-control study of 27,633](#)  
25 [respiratory samples originating from 20 primary care centres](#) in Madrid, Spain, finding that the  
26 probability of admission to an intensive care unit (ICU) was twice as high in patients infected  
27 with the Alpha variant compared to those infected with the primary strain(92);  
28 [Furthermore, while](#) this variant became the dominant strain within four months, and led to an  
29 increase in disease burden as a result(92).

30  
31  
32  
33  
34  
35  
36  
37  
38  
39  
40  
41  
42  
43  
44  
45  
46  
47  
48  
49  
50  
51  
52  
53  
54  
55  
56  
57  
58  
59  
60  
61  
62  
63  
64  
65  
66  
67  
68  
69  
70  
71  
72  
73  
74  
75  
76  
77  
78  
79  
80  
81  
82  
83  
84  
85  
86  
87  
88  
89  
90  
91  
92  
93  
94  
95  
96  
97  
98  
99  
100  
101  
102  
103  
104  
105  
106  
107  
108  
109  
110  
111  
112  
113  
114  
115  
116  
117  
118  
119  
120  
121  
122  
123  
124  
125  
126  
127  
128  
129  
130  
131  
132  
133  
134  
135  
136  
137  
138  
139  
140  
141  
142  
143  
144  
145  
146  
147  
148  
149  
150  
151  
152  
153  
154  
155  
156  
157  
158  
159  
160  
161  
162  
163  
164  
165  
166  
167  
168  
169  
170  
171  
172  
173  
174  
175  
176  
177  
178  
179  
180  
181  
182  
183  
184  
185  
186  
187  
188  
189  
190  
191  
192  
193  
194  
195  
196  
197  
198  
199  
200  
201  
202  
203  
204  
205  
206  
207  
208  
209  
210  
211  
212  
213  
214  
215  
216  
217  
218  
219  
220  
221  
222  
223  
224  
225  
226  
227  
228  
229  
230  
231  
232  
233  
234  
235  
236  
237  
238  
239  
240  
241  
242  
243  
244  
245  
246  
247  
248  
249  
250  
251  
252  
253  
254  
255  
256  
257  
258  
259  
260  
261  
262  
263  
264  
265  
266  
267  
268  
269  
270  
271  
272  
273  
274  
275  
276  
277  
278  
279  
280  
281  
282  
283  
284  
285  
286  
287  
288  
289  
290  
291  
292  
293  
294  
295  
296  
297  
298  
299  
300  
301  
302  
303  
304  
305  
306  
307  
308  
309  
310  
311  
312  
313  
314  
315  
316  
317  
318  
319  
320  
321  
322  
323  
324  
325  
326  
327  
328  
329  
330  
331  
332  
333  
334  
335  
336  
337  
338  
339  
340  
341  
342  
343  
344  
345  
346  
347  
348  
349  
350  
351  
352  
353  
354  
355  
356  
357  
358  
359  
360  
361  
362  
363  
364  
365  
366  
367  
368  
369  
370  
371  
372  
373  
374  
375  
376  
377  
378  
379  
380  
381  
382  
383  
384  
385  
386  
387  
388  
389  
390  
391  
392  
393  
394  
395  
396  
397  
398  
399  
400  
401  
402  
403  
404  
405  
406  
407  
408  
409  
410  
411  
412  
413  
414  
415  
416  
417  
418  
419  
420  
421  
422  
423  
424  
425  
426  
427  
428  
429  
430  
431  
432  
433  
434  
435  
436  
437  
438  
439  
440  
441  
442  
443  
444  
445  
446  
447  
448  
449  
450  
451  
452  
453  
454  
455  
456  
457  
458  
459  
460  
461  
462  
463  
464  
465  
466  
467  
468  
469  
470  
471  
472  
473  
474  
475  
476  
477  
478  
479  
480  
481  
482  
483  
484  
485  
486  
487  
488  
489  
490  
491  
492  
493  
494  
495  
496  
497  
498  
499  
500  
501  
502  
503  
504  
505  
506  
507  
508  
509  
510  
511  
512  
513  
514  
515  
516  
517  
518  
519  
520  
521  
522  
523  
524  
525  
526  
527  
528  
529  
530  
531  
532  
533  
534  
535  
536  
537  
538  
539  
540  
541  
542  
543  
544  
545  
546  
547  
548  
549  
550  
551  
552  
553  
554  
555  
556  
557  
558  
559  
560  
561  
562  
563  
564  
565  
566  
567  
568  
569  
570  
571  
572  
573  
574  
575  
576  
577  
578  
579  
580  
581  
582  
583  
584  
585  
586  
587  
588  
589  
590  
591  
592  
593  
594  
595  
596  
597  
598  
599  
600  
601  
602  
603  
604  
605  
606  
607  
608  
609  
610  
611  
612  
613  
614  
615  
616  
617  
618  
619  
620  
621  
622  
623  
624  
625  
626  
627  
628  
629  
630  
631  
632  
633  
634  
635  
636  
637  
638  
639  
640  
641  
642  
643  
644  
645  
646  
647  
648  
649  
650  
651  
652  
653  
654  
655  
656  
657  
658  
659  
660  
661  
662  
663  
664  
665  
666  
667  
668  
669  
670  
671  
672  
673  
674  
675  
676  
677  
678  
679  
680  
681  
682  
683  
684  
685  
686  
687  
688  
689  
690  
691  
692  
693  
694  
695  
696  
697  
698  
699  
700  
701  
702  
703  
704  
705  
706  
707  
708  
709  
710  
711  
712  
713  
714  
715  
716  
717  
718  
719  
720  
721  
722  
723  
724  
725  
726  
727  
728  
729  
730  
731  
732  
733  
734  
735  
736  
737  
738  
739  
740  
741  
742  
743  
744  
745  
746  
747  
748  
749  
750  
751  
752  
753  
754  
755  
756  
757  
758  
759  
760  
761  
762  
763  
764  
765  
766  
767  
768  
769  
770  
771  
772  
773  
774  
775  
776  
777  
778  
779  
780  
781  
782  
783  
784  
785  
786  
787  
788  
789  
790  
791  
792  
793  
794  
795  
796  
797  
798  
799  
800  
801  
802  
803  
804  
805  
806  
807  
808  
809  
810  
811  
812  
813  
814  
815  
816  
817  
818  
819  
820  
821  
822  
823  
824  
825  
826  
827  
828  
829  
830  
831  
832  
833  
834  
835  
836  
837  
838  
839  
840  
841  
842  
843  
844  
845  
846  
847  
848  
849  
850  
851  
852  
853  
854  
855  
856  
857  
858  
859  
860  
861  
862  
863  
864  
865  
866  
867  
868  
869  
870  
871  
872  
873  
874  
875  
876  
877  
878  
879  
880  
881  
882  
883  
884  
885  
886  
887  
888  
889  
890  
891  
892  
893  
894  
895  
896  
897  
898  
899  
900  
901  
902  
903  
904  
905  
906  
907  
908  
909  
910  
911  
912  
913  
914  
915  
916  
917  
918  
919  
920  
921  
922  
923  
924  
925  
926  
927  
928  
929  
930  
931  
932  
933  
934  
935  
936  
937  
938  
939  
940  
941  
942  
943  
944  
945  
946  
947  
948  
949  
950  
951  
952  
953  
954  
955  
956  
957  
958  
959  
960  
961  
962  
963  
964  
965  
966  
967  
968  
969  
970  
971  
972  
973  
974  
975  
976  
977  
978  
979  
980  
981  
982  
983  
984  
985  
986  
987  
988  
989  
990  
991  
992  
993  
994  
995  
996  
997  
998  
999  
1000

Meanwhile in Cannes, France, infection with the Alpha variant was associated with a 3.8-fold higher risk of transfer to an ICU or death compared to the primary strain, [as determined through a retrospective cohort study of 158 COVID-19 patients](#)(93). [A large retrospective cohort study found that, during the third COVID-19 wave in Ontario,](#) Canada, where 91% of infections were caused by the Alpha variant, the risk of both hospitalisation (adjusted odds ratio (aOR)=1.57) and death (aOR=1.52) was higher compared to primary strain infections(94). Overall, the Alpha variant was approximately 50-70% more transmissible and was associated with a 30-60% increased risk of hospitalisation and death compared to the primary strain(95-100).

The Alpha variant was found to have a minimal impact on the effectiveness of current vaccines(101, 102), while the risk of reinfection remained similar for this variant as with previous ones(103). On 3<sup>rd</sup> September 2021, the European Centre for Disease Prevention and Control (ECDC) reclassified the Alpha, and the Alpha+E484K mutation variants from a VOC to a 'de-escalated variant' (104).

### **5.1.2 Beta**

The Beta SARS-CoV-2 variant, of the B.1.351 lineage, was first documented in South Africa in May 2020(3). This variant contains five S protein mutations of interest: N501Y, E484K, D614G, K417N, and A701V. Like the Alpha variant, Beta contains the mutations N501Y, E484K, and D614G, which increase ACE2 receptor binding affinity(80, 87), increase virulence(105), and enhance resistance to neutralising antibodies(91, 106). The K417 residue of the SARS-CoV-2 S protein interacts with the D30 residue of the ACE2 receptor, forming a



1  
2  
3 salt bridge across the central contact region(65, 78), however, the K417N mutation appears to  
4 have a limited impact on ACE2 receptor binding(80). The A701V mutation is located close to  
5 the furin cleavage site but has a minimal impact on transmissibility or antibody resistance(101).

6  
7 In a genomic and epidemiological study, it was concluded that the Beta SARS-CoV-2  
8 variant had a selective advantage over previous variants from its increased transmissibility and  
9 immune escape abilities(107, 108), while the E484K/N501K mutations significantly enhanced  
10 the binding affinity of Beta and, hence, increased its transmissibility(109). A retrospective  
11 cohort study [of 22,068 participants](#) found that infection with the Beta variant was associated  
12 with an increased hospitalisation risk compared to an infection with a non-VOC (hazard ratio  
13 (HR)=2.30)(100). Overall, Beta is approximately 25-50% more transmissible, is associated  
14 with a possible increase in risk of hospital mortality, and has enhanced resistance to antibody  
15 neutralisation compared to previous variants(107, 108, 110).

### 20 **5.1.3 Gamma**

21  
22 The Gamma variant is of the P.1 lineage and was first reported in November 2020 from  
23 travellers returning to Japan from Brazil, and was later discovered in Brazil(3, 111). This  
24 variant contains the S protein mutations of interest; K417T, E484K, N501Y, D614G, and  
25 H655Y(104). As mentioned, the N501Y and D614G mutations increase ACE2 receptor  
26 binding affinity and increase infectivity of the virus(80, 87). The N501Y, K417N/T, and E484K  
27 mutation trinity, meanwhile, is shared by both Gamma and Beta variants, and is associated with  
28 enhanced infectivity and lethality compared to the N501Y mutation alone, possibly due to  
29 tighter binding of the S protein to the ACE2 receptor due to increased electrostatic  
30 contribution(112). Gamma also possesses the H655Y mutation which was found to provide  
31 enhanced viral escape abilities from multiple human monoclonal antibodies *in vitro*(113).

32  
33 The Gamma variant is associated with heightened transmissibility(109, 110, 114), with  
34 one study concluding that it possesses a 1.7- to 2.4-fold increased transmissibility compared to  
35 previous variants(115). Additionally, the wave of infections caused by the Gamma variant in  
36 Brazil was associated with a 13% increase in death rate compared to the previous wave,  
37 suggesting the greater virulence held by Gamma compared to previous viral strains(116).

38  
39 A surveillance study from seven European countries concluded that the Gamma variant  
40 was associated with a higher risk of hospitalisation (aOR=2.6) and admission to an ICU  
41 (aOR=2.2) when compared to non-VOC cases(117). In Manaus, Brazil the resurgence of  
42 COVID-19, despite high seroprevalence, suggested that the Gamma variant had a moderate  
43 resistance to neutralising antibodies(118), however, Gamma has been shown to be significantly  
44 less resistant to neutralising antibodies, compared to other variants, including Beta(119).

### 51 **5.1.4 Delta**

52  
53 The Delta variant, from the B.1.617.2 lineage, was first documented in India in October  
54 2020 and was classified as a VOC on 11<sup>th</sup> May 2021(3). Of the S protein mutations of interest,  
55 the aforementioned P681H and D614G are also harboured by the Delta variant(104) and  
56 similarly impacts its ACE2 receptor binding affinity and transmissibility(106, 120, 121).  
57 Unlike the E484K mutation seen in previous variants, Delta contains the E484Q mutation  
58 which, along with a L452R mutation also located within the RBD, causes significantly higher  
59 affinity for the ACE2 receptor than the primary strain or the E484K mutation alone(122). The  
60

1  
2  
3 L452R mutation alone results in greater RBD-ACE2 receptor binding affinity and enhanced  
4 escape from neutralising antibodies(123, 124). Lastly, the Delta variant contains the T478K  
5 mutation, located on the interface between the S protein and the ACE2 receptor when bound,  
6 which increases the electrostatic potential of the S protein and enhances binding affinity(125).  
7

8 The Delta variant quickly became the dominant variant in the UK(126), US(127),  
9 Europe, and around the world(128). The mutations present in the Delta variant, enhanced the  
10 transmissibility of the virus as a result of increased binding affinity to the ACE2 receptor(109).  
11 It was estimated that the reproduction number of the Delta variant is 97% greater than non-  
12 VOC/VOI and approximately three times that of the Alpha, Beta, and Gamma variants(110),  
13 which highlights the competitive advantage that this variant had over earlier ones and how it  
14 rapidly became the dominant strain globally. The fast replication rate of Delta likely contributes  
15 to its increased transmissibility compared to Alpha, Beta, and Gamma. From infected  
16 individuals, the Delta variant has been able to be detected by polymerase chain reaction (PCR)  
17 within the first four days from exposure, while non-Delta infections could only be detected  
18 after six days(129). Furthermore, viral loads of people infected with the Delta variant were  
19 found to be significantly higher than people infected with other strains(129), including  
20 Beta(130). Delta is also thought to better escape neutralisation, with the frequency of post-  
21 vaccination infections much higher for the Delta variant than infections with the primary strain  
22 in India(131) and blood sera samples from individuals who had received one dose of a COVID-  
23 19 vaccine showing minimal neutralisation of the Delta variant(132).  
24  
25

26 The Delta variant is also associated with an increased disease severity. In Scotland,  
27 infection with the Delta variant was associated with an increased risk of hospitalisation  
28 (HR=1.85) compared to infection with the Alpha variant(133). Compared to non-VOC  
29 infections, North American [retrospective cohort](#) studies demonstrated that infection with Delta  
30 was associated with a 108%(134) or HR=2.3(100) increased risk of hospitalisation, a 234%  
31 increased risk for admission to an ICU, and a 132% increased risk of death(134). Lastly, a  
32 [cross-sectional study of 6238 Delta and 3262 primary strain cases](#) in India found that the risk  
33 of death was around 1.8 times higher for Delta infections, while Delta also infected and induced  
34 symptoms in a greater proportion of younger people (0-19 years old), compared to the primary  
35 strain(131).  
36  
37  
38  
39  
40  
41  
42  
43

#### 44 **5.1.5 Omicron**

45 The Omicron variant is of the B.1.1.529 lineage and was first discovered in November  
46 2021 in South Africa and Botswana before being detected in multiple countries and classified  
47 as a VOC on 26<sup>th</sup> November 2021(3). This variant contains over 30 S protein mutations(104),  
48 23 of which have been previously identified, including K417N, T478K, E484A, D614G,  
49 H655Y, P681H, and N501Y(135). 15 Omicron mutations are contained within the RBD(17)  
50 providing the variant with a significantly enhanced binding affinity to the ACE2 receptor(135,  
51 136). In addition, various single mutations harboured with the RBD of the Omicron variant  
52 impair the effectiveness of neutralising antibodies, including K417N, N440K, G446S, E484A,  
53 Q493K, G496S, G339D, S371L, and S375F(17).  
54  
55  
56  
57

58 The emergence of Omicron has been followed by a tidal wave of infections worldwide.  
59 Early data from South Africa demonstrated that the proportion of COVID-19 cases caused by  
60

1  
2  
3 the Omicron variant rose from 3% in early October, to 98% by early December(137). In late  
4 December 2021, meanwhile, the doubling time for number of positive Omicron cases was  
5 between two and three in the UK, US, and much of Europe(138, 139), highlighting the  
6 transmissibility of this variant. The mutations harboured by Omicron that enhance its binding  
7 affinity(135, 136) and ability to escape neutralising antibodies(17) likely drove its rapid spread,  
8 as did its fast replication rate, which is around 70 times faster than the Delta and primary  
9 strains(140). The reinfection rate of Omicron has also been found to be significantly higher  
10 than that of previous variants in studies from Scotland(141) and South Africa(142).

11  
12  
13  
14 The Omicron variant has extensive but incomplete escape from naturally acquired and  
15 vaccine-induced immunity(143, 144). Compared to the Delta variant, Omicron requires around  
16 a ten-fold increased antibody titre to be neutralised, following vaccination with either Oxford-  
17 AstraZeneca or Pfizer/BioNtech vaccines(145). Indeed, blood sera from individuals who had  
18 received two doses of the Pfizer/BioNtech vaccine exhibited more than a 25-fold reduction in  
19 neutralising antibody titres against the Omicron variant compared to the primary strain(146).  
20 T-cell responses to Omicron may remain intact, however. One preprint study demonstrated that  
21 70-80% of the T-cell response targeting the S protein was maintained in those vaccinated or  
22 with prior infection, while the magnitude of Omicron cross-reactive T-cells was like that of  
23 both Delta and Beta variants(147). Furthermore, data from Pfizer/BioNtech revealed that 80%  
24 of the epitopes in the Omicron variant S protein that are recognised by CD8+ T-cells were not  
25 affected by this variant's mutations, following two-doses of the vaccine(146). T-cell responses  
26 induced from vaccine administration or prior infection may, therefore, provide some protection  
27 from severe disease.  
28  
29  
30  
31

32 Recent real-world evidence has implied that Omicron infection is milder in severity  
33 than previous variants. In an early South African analysis, the risk of hospitalisation (aOR=0.2)  
34 was lower for Omicron infections compared to non-Omicron SARS-CoV-2 infections(137)  
35 while, compared to earlier infections associated with the Delta variant, Omicron-infected  
36 individuals had a lower risk of severe disease (aOR=0.3)(137). In December 2021 in England,  
37 Omicron cases were found to induce a significantly reduced risk of hospitalisation or  
38 presentation for emergency care in comparison to Delta cases(74, 75). The decreased disease  
39 severity inflicted by Omicron may be due to its reduced capacity for replication in lung tissue,  
40 which was found to be more than ten times less in lung tissue compared to Delta(140).  
41 Concordantly, the S protein of the Omicron variant is less efficient at cleaving the ACE2  
42 receptor and entering cells of lung organoids(145), while is also less able to cause fusion  
43 between lung cells compared to Delta(145), which is often observed in cases of severe COVID-  
44 19. The reduction in replication within the lungs, and the preservation of T-cell responses likely  
45 contribute to the milder disease exerted by the Omicron variant.  
46  
47  
48  
49

50 Although the Omicron variant appears to manifest in mild disease, high case numbers  
51 may still result in many hospitalisations and deaths in those vulnerable to the virus. Omicron  
52 case numbers may be beginning to peak, however. In South Africa, a 29.7% decrease in weekly  
53 COVID-19 cases were reported in the week ending 25<sup>th</sup> December 2021, compared to the  
54 previous week, and the Omicron wave is said to have passed(148). Concerningly, global case  
55 numbers continue to rise rapidly(149) and many countries will continue to feel the pressure  
56 exerted by the wave of Omicron infections.  
57  
58  
59  
60



## 5.2 Variants of interest

### 5.2.1 Lambda

The Lambda variant, of the C.37 lineage, was first documented in Peru in December 2020 and was designated as a VOI on 14<sup>th</sup> June 2021(3). This variant contains the S protein mutations; D614G, L452Q, and F490S(104). The L452Q mutation, located within the RBD, enhances binding affinity to the ACE2 receptor and increases the infectivity of Lambda(150), while, together L452Q and F490S increase the resistance of this variant to vaccine-elicited antibody neutralisation(150). Furthermore, F490S was identified as being a high-risk mutation for enhancing abilities to escape neutralisation(150).

Infectivity of the Lambda variant may be higher than that of Alpha, Gamma, and other D614G containing variants(151), suggesting that Lambda could potentially spread more rapidly and effectively. Additionally, compared to the primary SARS-CoV-2 virus, antibody neutralisation was found to be decreased by 3.05-fold for the Lambda variant, higher than that for Gamma (2.33-fold) and Alpha (2.03-fold) variants(151). However, findings suggest that the Lambda variant can be neutralised by monoclonal antibodies and current vaccines are protective against this variant(150).

### 5.2.2 Mu

The Mu variant, from the B.1.621 lineage, was first documented in Columbia in January 2021 before receiving designation as a VOI on 30<sup>th</sup> August 2021(3). This variant contains the aforementioned S protein mutations E484K, N501Y, D614G, and P681H(104). Mu also contains the S protein mutation R346K, located within the RBD(104, 152), which may induce large binding free energy changes that disrupt the binding of antibodies to the S protein and enhance the ability of the variant to escape neutralisation(153). As discussed, the E484K, N501Y, D614G, and P681H mutations have been shown to increase transmissibility(80, 85, 87, 105, 109, 112, 120, 121) and neutralisation escape(91, 106) suggesting that the Mu SARS-CoV-2 variant is likely to be more infectious than the primary strain.

Although the Lambda and Mu variants have been outcompeted by Delta and now Omicron, the development and spread of VOIs will need to be closely monitored and studied to appreciate their pathogenicity, transmissibility, and virulence.

## 5.3 VUM

As of 25<sup>th</sup> January 2022, there are three VUM listed by the WHO(3) (*table 1*).

## 6. Vaccinations

The COVID-19 pandemic prompted a rapid international search for safe and effective vaccines against the SARS-CoV-2 virus. In line with previous vaccine development, including for both SARS-CoV and MERS-CoV, the S protein was a key target for COVID-19 vaccine development(154). As of 24<sup>th</sup> January 2022, 33 approved vaccines are in use in 197 countries, with ten vaccines having gained emergency use listing approval from the WHO(4), (*table 2*). As of 25<sup>th</sup> January 2022 there are 194 vaccines in pre-clinical development and 140 in clinical

1  
2  
3 development(155). Numerous studies have explored the effectiveness of approved vaccines,  
4 however, large variations in vaccine effectiveness are reported. This variability is likely due to  
5 several factors in the studies including, the country, date, and population size of the study, as  
6 well as the SARS-CoV-2 variants circulating during the study period. These factors, along with  
7 how the effectiveness is reported, mean that it is difficult to compare vaccines and fully  
8 understand how effective each vaccine is. Here, we review the COVID-19 vaccines in use  
9 around the world.  
10  
11  
12  
13

### 14 **6.1 Pfizer/BioNtech - BNT162b2**

15 The BNT162b2 vaccine (Comirnaty) is a lipid nanoparticle-formulated, nucleoside-  
16 modified mRNA vaccine encoding a modified SARS-CoV-2 S protein which was developed  
17 through a collaborative effort between Pfizer (New York, US) and BioNTech (Mainz,  
18 Germany)(156, 157). BNT162b2 gained WHO emergency use listing on 31<sup>st</sup> December  
19 2020(158) and, as of 24<sup>th</sup> January 2022, has been approved for use in 136 countries(4).  
20  
21

22 Following administration of BNT162b2, a Th1-biased response is observed, with  
23 tumour necrosis factor alpha (TNF $\alpha$ ), interferon gamma (IFN $\gamma$ ), and interleukin-2 (IL-2) all  
24 elevated following vaccination, compared to placebo(159, 160). Highest neutralisation titres  
25 are found between seven and fourteen days following the second dose(161), while those  
26 previously infected with COVID-19 showed a four-fold increase in antibody binding and a 18-  
27 fold increase in neutralisation titres compared to previously uninfected individuals following  
28 two-doses(162). The BNT162b vaccine is well tolerated, with limited reactogenicity. Redness  
29 and swelling at injection site have been reported, however mild or moderate pain at the injection  
30 site is the most commonly reported reaction to vaccination(161). Fatigue, muscle pain,  
31 headache and chills are other commonly reported symptoms following BNT162b2  
32 administration(163). The rate of systemic reactions after a second dose of BNT162b has been  
33 found to be 1.7 to 2 times higher than after a first dose, possibly suggesting an immunity-  
34 boosting effect(164). Many safety reports of this vaccine describe no serious adverse  
35 events(161, 164, 165), however, a large study found that BNT162b2 was associated with an  
36 increased risk of myocarditis, lymphadenopathy, appendicitis, and herpes zoster  
37 infection(166). Although rare, allergic reaction or anaphylaxis has also been reported following  
38 administration of the BNT162b2 vaccine(163). **Table 2** outlines clinical trial and real-world  
39 data for vaccine effectiveness.  
40  
41  
42  
43  
44  
45  
46

### 47 **6.2 Oxford-AstraZeneca – AZD1222**

48 The AZD1222 vaccine (Vaxzevria) is a non-replicating vector of the chimpanzee  
49 adenovirus ChAdOx1, modified to encode the SARS-CoV-2 S protein(167). Developed  
50 through collaboration between the University of Oxford and AstraZeneca (Cambridge, UK),  
51 this vaccine was given WHO emergency use listing on 16<sup>th</sup> February 2021(158) and has been  
52 approved for use in 137 countries, as of 24<sup>th</sup> January 2022(4). The WHO has granted emergency  
53 use listing to two versions of this vaccine (AZD1222 and Covishield) in order to utilise  
54 Covishield as part of their worldwide COVAX initiative, which is being produced by the Serum  
55 Institute of India and AstraZeneca-SKBio (Republic of Korea)(168).  
56  
57  
58  
59  
60

1  
2  
3  
4  
5  
6  
7  
8  
9  
10  
11  
12  
13  
14  
15  
16  
17  
18  
19  
20  
21  
22  
23  
24  
25  
26  
27  
28  
29  
30  
31  
32  
33  
34  
35  
36  
37  
38  
39  
40  
41  
42  
43  
44  
45  
46  
47  
48  
49  
50  
51  
52  
53  
54  
55  
56  
57  
58  
59  
60

Following administration of AZD1222, significant antibody production, predominantly of IgG1 and IgG3 subclasses, and a Th-1 cell response, with increased expression of IFN $\gamma$  and TNF $\alpha$ , is seen(122, 169). One dose of AZD1222 has been shown to produce a neutralising antibody response in 91% of participants, while a second dose resulted in 100% of participants producing neutralising antibodies(170). Mild and moderate itch, pain, redness, swelling, tenderness, and warmth are common local reactions, while chills, fatigue, fever, headache, muscle ache, and nausea are commonly reported systemic reactions following AZD1222 administration(170). Rare symptoms, including severe chest pain, nasal bleeding, and allergic reaction have been reported following AZD1222 administration(171). **Table 2** outlines clinical trial and real-world data for vaccine effectiveness.

### 6.3 Johnson & Johnson - Ad26.COV.2.S

The Ad26.COV.2.S vaccine is a non-replicating adenovirus vector, modified to contain the SARS-CoV-2 S protein in a prefusion-stabilised conformation and requires a single dose(172). This vector was developed from the recombinant human adenovirus type 26 by the Janssen pharmaceutical company of Johnson & Johnson (New Brunswick, New Jersey, US)(172) and was listed for WHO emergency use listing on 12<sup>th</sup> March 2021(158). As of 24<sup>th</sup> January 2022, Ad26.COV.2.S has been approved for use in 106 countries(4).

The Ad26.COV.2.S vaccine induces the production of a variety of antibody subclasses, such as IgG, IgM, and IgA, and promotes several non-neutralising antibody responses, including activation of CD4<sup>+</sup> and CD8<sup>+</sup> Th1-cells and production of IFN $\gamma$ , IL-2, and TNF $\alpha$ (173, 174). Although neutralising antibody responses induced by Ad26.COV.2.S are reduced against SARS-CoV-2 variants, non-neutralising antibody and T-cell responses have been found to be preserved against VOC(173), while a prior COVID-19 infection significantly increases levels of S protein-binding antibodies, antibody-dependent cellular cytotoxicity, and neutralising antibodies against VOCs including Beta and Delta(175). Ad26.COV.2.S is safe and well tolerated, with a large clinical trial demonstrating that headache, fatigue, and myalgia, are the most common systemic reactions, while injection-site pain is the most common local reaction following administration(172). Like other vaccines, Ad26.COV.2.S has been associated with serious adverse events, such as allergic reactions and cerebral venous sinus thrombosis, however, these are rare(163, 176). **Table 2** outlines clinical trial and real-world data for vaccine effectiveness.

### 6.4 Moderna – mRNA-1273

The mRNA-1273 vaccine (Spikevax) developed by Moderna (Massachusetts, US) is a lipid-nanoparticle-encapsulated mRNA vaccine expressing the SARS-CoV-2 S protein that has been prefusion-stabilised(177). This vaccine gained WHO emergency use listing on 30<sup>th</sup> April 2021(158), and as of 24<sup>th</sup> January 2022, has been approved for use in 85 countries(4).

The mRNA-1273 vaccine elicits a strong CD4<sup>+</sup> Th-1 cell response, with TNF $\alpha$ , IFN $\gamma$ , and IL-2 expression increased following administration(178-180), while neutralising antibody titres have been shown to significantly increase up until around 28 days following the second dose of the vaccine, and afterwards remain consistently high(181). Fatigue, muscle pain, headache, chills, joint pain, and injection-site pain/reaction are common adverse effects caused by the mRNA-1273 vaccine(163, 177), while serious adverse effects are often avoided(177,

1  
2  
3 181). Serious adverse events, including allergic reaction and anaphylaxis are rare, but not  
4 inconceivable following mRNA-1273 administration(163). **Table 2** outlines clinical trial and  
5 real-world data for vaccine effectiveness.  
6  
7

### 8 **6.5 Other WHO emergency use listed COVID-19 vaccines**

9  
10 In addition to the five COVID-19 vaccines described previously, five other vaccines  
11 have gained emergency use listing by the WHO. First, the Sinopharm BBIBP-CorV COVID-  
12 19 vaccine (Covilo) was developed by the Beijing Bio-Institute of Biological Products, a  
13 subsidiary of China National Biotec Group, and was given WHO emergency use listing on 7<sup>th</sup>  
14 May 2021(158). This vaccine is a 19nCoV-CDC-Tan-HB02 strain SARS-CoV-2 antigen that  
15 is produced in Vero cells, inactivated by  $\beta$ -propiolactone, and then purified and absorbed with  
16 aluminium hydroxide(182). Next, the CoronaVac vaccine, developed by Sinovac Biotech  
17 (Beijing, China), was listed for WHO emergency use on 1<sup>st</sup> June 2021(158). Like the BBIBP-  
18 CorV vaccine, this vaccine is a Vero cell-based, aluminium hydroxide-adjuvanted,  $\beta$ -  
19 propiolactone-inactivated vaccine, however, it is based on the SARS-CoV-2 CZ02 strain(183).  
20 Covaxin (BBV152) is a whole virion inactivated SARS-CoV-2 vaccine formula developed by  
21 Bharat Biotech International Ltd (India)(184) which gained emergency use listing from the  
22 WHO On 3<sup>rd</sup> November 2021(185). Lastly, Covovax and its originator, Nuvaxovid (NVX-  
23 CoV2372), were both developed by Novavax (Maryland, United States) and the Coalition for  
24 Epidemic Preparedness Innovations (Oslo, Norway), and gained emergency use listing on 17<sup>st</sup>  
25 and 21<sup>th</sup> December 2021, respectively(186, 187). Both vaccines are manufactured using the  
26 same technology, and consist of a recombinant SARS-CoV-2 S protein nanoparticle  
27 administered with the adjuvant Matrix-M as a co-formulation(188). These vaccines produce  
28 similar immune responses to those already discussed. Studies assessing the efficacy of these  
29 vaccines are outlined in **table 2**.  
30  
31  
32  
33  
34  
35  
36  
37

### 38 **6.10 Other approved vaccines**

39 In addition to the vaccines that have received emergency use listing from the WHO,  
40 around the world, vaccines have been developed, tested, and approved to combat COVID-19.  
41 As of 24<sup>th</sup> January 2022, 33 vaccines, including the ten described above, have been approved  
42 in at least one country(4). The remaining 23 approved vaccines are outlined in **table 3**.  
43  
44

### 45 **6.11 Waning immunity and boosters**

46 Throughout the COVID-19 pandemic, emerging variants have threatened the  
47 effectiveness of vaccines (**table 2**). Simultaneously, waning immunity following vaccination  
48 questions how long vaccines remain effective and highlights the importance of booster doses.  
49 Indeed, protection against SARS-CoV-2 following vaccination decreases over time, both in  
50 terms of antibody titres(189-191) and vaccine effectiveness(192-195). **However, cellular**  
51 responses, such as T-cell immunity, may persist for longer periods; **however**(196, 197). With  
52 a gradual loss of protection from SARS-CoV-2 following COVID-19 vaccination, many  
53 countries are now rolling out booster programmes with the aim of raising levels of immunity.  
54  
55

56 Since booster programmes began, evidence that a booster vaccine dose enhances  
57 antibody and cellular responses has accumulated. Following a third dose of vaccine,  
58 neutralising antibody titres increase significantly(198-201) and, in some cases, to higher levels  
59  
60

1  
2  
3 than after the primary two doses(198). Additionally, boosters have also been found to increase  
4 neutralising antibody titres against Beta, Gamma, Delta, and Omicron variants(199, 202, 203).  
5 T-cell response is also enhanced following a third dose(200, 204, 205). Together, enhancing  
6 neutralising antibody and cellular responses with a booster vaccine dose is likely to provide a  
7 greater level of protection than relying on immunity built through a primary regimen.  
8  
9

10 The antibody and cellular responses observed following booster vaccinations have been  
11 found to correlate with increased levels of protection against SAR-CoV-2 infection and severe  
12 illness. On 30<sup>th</sup> July 2021, Israel was the first country to offer a third dose of BNT162b2 to  
13 certain groups. Subsequently, several studies have revealed that those who received a third  
14 vaccine dose were significantly less likely to be infected or have severe disease with SARS-  
15 CoV-2 compared to those who received two-doses(206-209). In those aged 60 or older, an  
16 observational study demonstrated that the rate of severe COVID-19 and death was lower in the  
17 boosted group by a factor of 17.9 and 14.7, respectively, compared to the non-boosted  
18 group(210). Booster doses of COVID-19 vaccine have been shown to be effective against  
19 infection with Delta(211, 212) and, to a lesser degree, Omicron variants(75, 145, 146, 212-  
20 214) despite the numerous mutations harboured by these variants. Overall, increasing evidence  
21 is pointing towards the benefits of booster doses of COVID-19 vaccines, therefore it is expected  
22 that booster programmes will continue to roll out across the globe. Based on current evidence,  
23 the CDC recommend that the time interval for receiving a booster following the primary  
24 regimen is five months for Pfizer/BioNTech BNT162b2 primary regimen, six months for  
25 Moderna mRNA-1273 primary regimen, and two months for Johnson & Johnson  
26 Ad26.COVS primary regimen(215). As the pandemic progresses and new variants emerge,  
27 variant-specific vaccines may require development, with pre-clinical studies demonstrating  
28 their efficacy(216) and pharmaceutical companies, such as Pfizer, advancing in variant-specific  
29 vaccine development(146). Policy makers should also consider when vaccine boosters will be  
30 given in the future and who will receive booster doses in the long-term.  
31  
32  
33  
34  
35  
36  
37  
38

### 39 **7. Emerging Treatments**

40 As more is learnt about the virus, the therapeutic strategy against COVID-19 develops.  
41 There are currently over two thousand ongoing trials assessing certain treatment strategies for  
42 COVID-19(217). Recently, antivirals including molnupiravir (Lagevrio) and  
43 nirmatrelvir/ritonavir (Paxlovid) have been approved in the UK(218, 219), US(220, 221), and  
44 Europe(222, 223) for treating COVID-19 in certain risk groups. Similarly, sotrovimab  
45 (Xevudy), a monoclonal antibody treatment, has recently been approved for use in treating  
46 certain COVID-19 patients in the UK(224), US(225), and Europe(226). These drugs have been  
47 shown to be effective at preventing poor clinical outcomes, including death, in those vulnerable  
48 to severe COVID-19 infection. Other drug treatments, such as janus kinase inhibitors,  
49 corticosteroids, and anti-inflammatories have contrasting evidence to support their use, and  
50 therefore, the use of specific drugs is either recommended for or against by certain treatment  
51 and management guidelines, which are discussed below.  
52  
53  
54  
55  
56  
57

### 58 **8. Guidelines**

59 The treatment and management of COVID-19 is a continually evolving topic, however,  
60 health authorities have published and continue to update guidelines and recommendations for



1  
2  
3 treating COVID-19. The WHO living guideline on COVID-19 and therapeutics is regularly  
4 updated, with the latest version, published on 14<sup>th</sup> January 2022 containing 14  
5 recommendations on COVID-19 treatment(227). In the UK, the National Institute for Health  
6 and Care Excellence (NICE)(228) and Medicines and Healthcare products Regulatory Agency  
7 (MHRA)(229) provide updated guidelines on COVID-19 treatment, while in Europe, the  
8 ECDC regularly publishes several guidelines providing recommendations on a range of  
9 COVID-19 related topics(230). In the US, the National Institutes of Health (NIH)(231) and the  
10 CDC(232) provide guidance on COVID-19 treatment and management, with the CDC  
11 supplying guidelines for specific groups including, employers, schools, health departments,  
12 and governments.  
13  
14  
15  
16  
17

### 18 **9. Considerations for the future**

19 **Novel infectious diseases and pandemics are an unpredictable but inevitable aspect of**  
20 **nature and it is, therefore, important that we learn from past pandemics to prepare for future**  
21 **ones. Firstly, the COVID-19 pandemic has highlighted and amplified the existing inequalities**  
22 **within society(233), with non-white ethnicity, social disadvantage, and unemployment all risk**  
23 **factors for testing positive for COVID-19(234) and those most economically deprived found**  
24 **to be particularly vulnerable(235). These inequalities require addressing to be better prepared**  
25 **for similar situations in the future.**  
26  
27

28 **Next, to progress through a pandemic we should be racing the pathogen, not each other.**  
29 **This statement becomes apparent when you consider the problems countries faced when**  
30 **seeking out PPE(236), and the vaccine inequity seen around the world(237), with developed**  
31 **countries often better placed to be able to purchase these items. Initiatives such as the WHO's**  
32 **COVAX programme are vital to protect those most vulnerable and reduce the global spread of**  
33 **disease. In October 2021, the UK government released a publication outlining where the**  
34 **policies implemented to reduce the impact of the COVID-19 pandemic failed, and the lessons**  
35 **learned from these failures (238). Here, ~~it is clear that~~ there is room for improvement, with the**  
36 **publication presenting conclusions and recommendations on how to enhance pandemic**  
37 **preparedness, lockdown and social distancing measures, testing and contact tracing, social care,**  
38 **and vaccines. In countries such as the UK, US, and much of Europe, where the COVID-19**  
39 **death rate has been high, steps need to be taken and lessons need to be learnt in order to be**  
40 **better prepared for the next pandemic. The responsibility of improving pandemic response lies**  
41 **with policy makers, the medical/scientific community, and the public, and will ultimately**  
42 **require a collaborative approach.**  
43  
44  
45  
46  
47

48 **However, ~~c~~certain aspects of the response to the COVID-19 pandemic have been a**  
49 **triumph, ~~however~~. One of the major victories was the rapid development and rollout of**  
50 **vaccines(239), which continue to be effective. The rollout of rapid testing and quarantine for**  
51 **positive cases was also important to at least disrupt the spread of the virus, especially given**  
52 **that asymptomatic individuals can contribute to the spread. Furthermore, the swift**  
53 **identification and sharing of knowledge of SARS-CoV-2 variants between countries should be**  
54 **applauded. Lessons can be learned from countries where COVID-19 was controlled. In Taiwan,**  
55 **managing the pandemic as directed by pre-COVID-19 pandemic plans prompted an immediate**  
56 **response; screening of all airline passengers arriving from Wuhan and high risk areas,**  
57 **restricting entry for non-Taiwanese citizens, 14-day quarantine period for contacts of**  
58  
59  
60

confirmed cases or returning travellers, a ban on large gatherings, and widespread mask wearing were some of the quickly implemented management strategies(240). New Zealand implemented similarly effective restrictions, with the addition of a national lockdown(240). Many of the pandemic control components that kept case and death numbers low in Taiwan and New Zealand could be adopted by other countries in the future and may lead to greater outcomes in terms of protecting both health of individuals and the health and wellbeing of the country. Overall, there is much to be learnt from the COVID-19 pandemic and, as we emerge from it, inspection of which policies failed, and which succeeded are imperative.

## **10. Conclusion**

COVID-19 remains prevalent and life-threatening. Although rollout of vaccines has been successful, ~~we must aim to address unmet goals, such~~ as attaining a high global vaccination coverage and ensuring that all healthcare systems have the capacity to cope with seasonal waves ~~are essential~~. With Omicron highly prevalent, we must continue to learn, develop therapeutics, and remain vigilant to new VOCs. Here, we have provided an overview of the virology of SARS-CoV-2, including the mutations harboured by variants of the virus and how these mutations effect its transmissibility and virulence. Lastly, we discussed the vaccines that have been developed and administered around the world and provided evidence supporting the rollout of booster doses. Future priorities should focus on continuing vaccination programmes and developing variant-specific vaccines as new mutations emerge. This, along with the expansion of our knowledge of SARS-CoV-2 and which therapies are most successful to treat infections with it will ultimately lead to favourable outcomes moving forward.

## **Research Questions**

- 1) How will the SARS-CoV-2 virus mutate in the future, and which mutations will give a competitive advantage that will allow the virus to inflict disease to many people?
- 2) How do we keep up with the rapidly changing SARS-CoV-2 environment and ensure that vaccines remain effective?
- 3) How do we manage the booster programme and when will future booster vaccinations be required in order to maintain high levels of immunity?
- 4) How can we learn from the current and past pandemics so that we are better prepared for the next one?

**Patient Involvement:** Patients who had been infected with covid-19 were contacted and requested to review the initial drafts of this manuscript. The received feedback was mostly positive and assisted in developing and focusing our review. Final drafts were also reviewed by patients who had had covid-19 and similar positive feedback was received.

**Contributorship statement and guarantor:** MY and HC performed the literature search and drafted the manuscript. HC revised and finalised the manuscript. JS reviewed and revised the manuscript. PE was responsible for the concept and design of the work. PE reviewed, revised, and finalised the manuscript. PE is the guarantor.

1  
2  
3  
4  
5 **Competing interests:** We have read and understood the BMJ policy on declaration of interests  
6 and declare the following interests: PE was funded by the Medical Research Council and now  
7 by Higher Education Funding Council for England (HEFCE). He has also received grants from  
8 Alzheimer's Research, UK, Alzheimer's Drug Discovery Foundation, Alzheimer's Society,  
9 UK, Medical Research Council, Alzheimer's Association US, Van-Geest foundation, and  
10 European Union grants. PE is a consultant to Roche, Pfizer, and Novo Nordisk. He has received  
11 educational and research grants from GE Healthcare, Novo Nordisk, Piramal Life Science/Life  
12 Molecular Imaging, Avid Radiopharmaceuticals and Eli Lilly. He is a member of the Scientific  
13 Advisory Board at Novo Nordisk. None of these were related to COVID-19  
14  
15  
16  
17

18 **Copyright statement:** The Corresponding Author has the right to grant on behalf of all authors  
19 and does grant on behalf of all authors, an exclusive licence (or non-exclusive for government  
20 employees) on a worldwide basis to the BMJ Publishing Group Ltd to permit this article (if  
21 accepted) to be published in BMJ editions and any other BMJ PGL products and sub-licenses  
22 such use and exploit all subsidiary rights, as set out in our licence  
23 (bmj.com/advice/copyright.shtml).”  
24  
25  
26

### 27 **Figure Legends:**

28  
29 **Figure 1: Genome and structure of SARS-CoV-2. A) SARS-CoV-2 genome and S**  
30 **protein amino acid composition.** The SARS-CoV-2 genome is approximately 30,000 base  
31 pairs (bp) long and consists of open reading frames (ORF) and elements that are essential for  
32 the virus' structure. The spike S protein is responsible for binding and entry into host cells.  
33 SARS-CoV-2 variants of concern (VOC) contain various S protein non-synonymous  
34 mutations that result in amino acid changes in the receptor binding domain (orange text) and  
35 the S1/S2 subunit interface (black text) which have been demonstrated to enhance  
36 transmissibility of the virus. VOC include Alpha ( $\alpha$ ), Beta ( $\beta$ ), Gamma ( $\gamma$ ), and Delta ( $\delta$ ). **B)**  
37 **SARS-CoV-2 structure.** SARS-CoV-2 is a RNA virus that has a crown-like appearance and  
38 contains four major structural proteins: nucleocapsid (N), spike (S), envelope (E), and  
39 membrane (M). **C) S and ACE2 interaction.** The SARS-CoV-2 S protein directly interacts  
40 with human angiotensin-converting enzyme 2 (ACE2) receptors in order to gain entry into  
41 host cells. The receptor binding domain (RBD) of the S protein tightly binds to ACE2. **D)**  
42 **Spike protein structure.** The S protein protrudes out from the main SARS-CoV-2 bulk and  
43 is comprised of two subunits: S1 and S2. S1 contains the RBD which directly interacts with  
44 the human ACE2 receptor, while the S1/S2 interface contains a furin cleavage site which is  
45 cleaved to allow S2 to fuse with the host cell membrane. Both the RBD and the S1/S2  
46 interface contain transmissibility increasing mutations that are harboured in variants of  
47 concern.  
48  
49  
50  
51  
52

53 **Figure 2: Viral entry and host response. A) At the alveolar epithelial cell layer.** Epithelial  
54 cells in the lungs express both angiotensin-converting enzyme 2 (ACE2) receptors and  
55 transmembrane protease serine 2 (TMPRSS2), allowing for infection by SARS-CoV-2.  
56 Replication of the virus within these cells induces an intense immune response that attracts  
57 monocytes, T-cells and macrophages and, in some cases, can result in a cytokine storm. **B)**  
58 **Within nearby blood vessels.** Cytokines produced by the epithelial cell layer are released  
59  
60



1  
2  
3 into blood vessels supplying the infected tissue, which causes the recruitment of further  
4 immune cells to the area, driving the damaging inflammatory response further. Circulating  
5 cytokines also create a systemic inflammatory environment. **C) Adaptive immune response.**  
6 Circulating lymphocytes carry viral antigens to lymph nodes and bone marrow to begin the  
7 adaptive immune system processes whereby B-cells, and later antibodies, are activated. **D)**  
8 **SARS-CoV2 host replication.** The SARS-CoV-2 virus utilises the ACE2 receptor and  
9 TMPRSS2 to gain entry into human cells. Following release of the viral RNA within the host  
10 cell, the virus utilises the host endoplasmic reticulum (ER) and Golgi apparatus to produce  
11 and manufacture new viral particles, which are released out of the cell to infect other cells  
12 and new hosts.  
13  
14  
15

16 **Table 1: SARS-CoV-2 variants and their S protein mutations.** \*first detection worldwide.  
17 Information correct as of 24<sup>th</sup> January 2022.  
18

19 **Table 2: Vaccine effectiveness of vaccines that have gained WHO emergency use listing.**  
20 \*Adjusted for covariates when reported by study, dates are reported in dd/mm/yyyy format.  
21 Vaccine effectiveness days/months refers to days/months since vaccination dose. Information  
22 correct as of reported conclusion date of each study.  
23  
24

25 **Table 3: COVID-19 vaccines approved in at least one country.** Information correct as of  
26 24th January 2022.  
27  
28

## 29 References

- 30 1. CDC.org [Internet]. Human Coronavirus Types. Centres for Disease Control and  
31 Prevention. [15 February 2020; cited 12 October 2021]. Available from:  
32 <https://www.cdc.gov/coronavirus/types.html>  
33
- 34 2. Who.int [Internet]. Weekly operational update on COVID-19 - 25 January 2022. World  
35 Health Organisation. [25 January 2022; cited 26 January 2022]. Available from:  
36 [https://www.who.int/publications/m/item/weekly-operational-update-on-covid-19---](https://www.who.int/publications/m/item/weekly-operational-update-on-covid-19---25-january-2022)  
37 [25-january-2022](https://www.who.int/publications/m/item/weekly-operational-update-on-covid-19---25-january-2022)  
38
- 39 3. Who.int [Internet]. Tracking SARS-CoV-2 variants. World Health Organisation. [25  
40 January 2022; cited 26 January 2022]. Available from:  
41 <https://www.who.int/en/activities/tracking-SARS-CoV-2-variants/>  
42
- 43 4. covid19.trackvaccines.org [Internet]. COVID-19 Vaccine Tracker. [24 January 2022;  
44 cited 26 January 2022]. Available from: <https://covid19.trackvaccines.org/>  
45
- 46 5. Chan JF, Yuan S, Kok KH, To KK, Chu H, Yang J, et al. A familial cluster of  
47 pneumonia associated with the 2019 novel coronavirus indicating person-to-person  
48 transmission: a study of a family cluster. *Lancet.* 2020;395(10223):514-23.  
49
- 50 6. Who.int [Internet]. Transmission of SARS-CoV-2: implications for infection  
51 prevention precautions - Scientific Brief. World Health Organisation. [9 July 2020;  
52 cited 28 October 2021]. Available from: [https://www.who.int/news-](https://www.who.int/news-room/commentaries/detail/transmission-of-sars-cov-2-implications-for-infection-prevention-precautions)  
53 [room/commentaries/detail/transmission-of-sars-cov-2-implications-for-infection-](https://www.who.int/news-room/commentaries/detail/transmission-of-sars-cov-2-implications-for-infection-prevention-precautions)  
54 [prevention-precautions](https://www.who.int/news-room/commentaries/detail/transmission-of-sars-cov-2-implications-for-infection-prevention-precautions)  
55
- 56 7. Gidari A, Sabbatini S, Bastianelli S, Pierucci S, Busti C, Bartolini D, et al. SARS-CoV-  
57 2 Survival on Surfaces and the Effect of UV-C Light. *Viruses.* 2021;13(3).  
58  
59  
60

- 1
  - 2
  - 3
  - 4
  - 5
  - 6
  - 7
  - 8
  - 9
  - 10
  - 11
  - 12
  - 13
  - 14
  - 15
  - 16
  - 17
  - 18
  - 19
  - 20
  - 21
  - 22
  - 23
  - 24
  - 25
  - 26
  - 27
  - 28
  - 29
  - 30
  - 31
  - 32
  - 33
  - 34
  - 35
  - 36
  - 37
  - 38
  - 39
  - 40
  - 41
  - 42
  - 43
  - 44
  - 45
  - 46
  - 47
  - 48
  - 49
  - 50
  - 51
  - 52
  - 53
  - 54
  - 55
  - 56
  - 57
  - 58
  - 59
  - 60
8. Pottage T, Garratt I, Onianwa O, Spencer A, Paton S, Verlander NQ, et al. A comparison of persistence of SARS-CoV-2 variants on stainless steel. *J Hosp Infect.* 2021;114:163-6.
  9. Guo L, Wang M, Zhang L, Mao N, An C, Xu L, et al. Transmission risk of viruses in large mucosalivary droplets on the surface of objects: A time-based analysis. *Infect Dis Now.* 2021;51(3):219-27.
  10. Carraturo F, Del Giudice C, Morelli M, Cerullo V, Libralato G, Galdiero E, et al. Persistence of SARS-CoV-2 in the environment and COVID-19 transmission risk from environmental matrices and surfaces. *Environ Pollut.* 2020;265(Pt B):115010.
  11. Hui KP, Cheung M-C, Perera RA, Ng K-C, Bui CH, Ho JC, et al. Tropism, replication competence, and innate immune responses of the coronavirus SARS-CoV-2 in human respiratory tract and conjunctiva: an analysis in ex-vivo and in-vitro cultures. *The Lancet Respiratory Medicine.* 2020;8(7):687-95.
  12. McAloon C, Collins A, Hunt K, Barber A, Byrne AW, Butler F, et al. Incubation period of COVID-19: a rapid systematic review and meta-analysis of observational research. *BMJ Open.* 2020;10(8):e039652.
  13. Bliddal S, Banasik K, Pedersen OB, Nissen J, Cantwell L, Schwinn M, et al. Acute and persistent symptoms in non-hospitalized PCR-confirmed COVID-19 patients. *Sci Rep.* 2021;11(1):13153.
  14. Grant MC, Geoghegan L, Arbyn M, Mohammed Z, McGuinness L, Clarke EL, et al. The prevalence of symptoms in 24,410 adults infected by the novel coronavirus (SARS-CoV-2; COVID-19): A systematic review and meta-analysis of 148 studies from 9 countries. *PLoS One.* 2020;15(6):e0234765.
  15. Kronbichler A, Kresse D, Yoon S, Lee KH, Effenberger M, Shin JI. Asymptomatic patients as a source of COVID-19 infections: A systematic review and meta-analysis. *Int J Infect Dis.* 2020;98:180-6.
  16. Arons MM, Hatfield KM, Reddy SC, Kimball A, James A, Jacobs JR, et al. Presymptomatic SARS-CoV-2 Infections and Transmission in a Skilled Nursing Facility. *N Engl J Med.* 2020;382(22):2081-90.
  17. Cao Y, Wang J, Jian F, Xiao T, Song W, Yisimayi A, et al. B.1.1.529 escapes the majority of SARS-CoV-2 neutralizing antibodies of diverse epitopes. *BioRxiv [Preprint].* 2021.
  18. Wolff D, Nee S, Hickey NS, Marschollek M. Risk factors for Covid-19 severity and fatality: a structured literature review. *Infection.* 2021;49(1):15-28.
  19. Zhou F, Yu T, Du R, Fan G, Liu Y, Liu Z, et al. Clinical course and risk factors for mortality of adult inpatients with COVID-19 in Wuhan, China: a retrospective cohort study. *Lancet.* 2020;395(10229):1054-62.
  20. Zhang J, Wang X, Jia X, Li J, Hu K, Chen G, et al. Risk factors for disease severity, unimprovement, and mortality in COVID-19 patients in Wuhan, China. *Clin Microbiol Infect.* 2020;26(6):767-72.
  21. Ebinger JE, Achamallah N, Ji H, Claggett BL, Sun N, Botting P, et al. Pre-existing traits associated with Covid-19 illness severity. *PLoS One.* 2020;15(7):e0236240.
  22. Williamson EJ, Walker AJ, Bhaskaran K, Bacon S, Bates C, Morton CE, et al. Factors associated with COVID-19-related death using OpenSAFELY. *Nature.* 2020;584(7821):430-6.

23. Li R, Tian J, Yang F, Lv L, Yu J, Sun G, et al. Clinical characteristics of 225 patients with COVID-19 in a tertiary Hospital near Wuhan, China. *J Clin Virol.* 2020;127:104363.
24. Guo L, Shi Z, Zhang Y, Wang C, Do Vale Moreira NC, Zuo H, et al. Comorbid diabetes and the risk of disease severity or death among 8807 COVID-19 patients in China: A meta-analysis. *Diabetes Res Clin Pract.* 2020;166:108346.
25. Feng Y, Ling Y, Bai T, Xie Y, Huang J, Li J, et al. COVID-19 with Different Severities: A Multicenter Study of Clinical Features. *Am J Respir Crit Care Med.* 2020;201(11):1380-8.
26. Tian J, Yuan X, Xiao J, Zhong Q, Yang C, Liu B, et al. Clinical characteristics and risk factors associated with COVID-19 disease severity in patients with cancer in Wuhan, China: a multicentre, retrospective, cohort study. *Lancet Oncol.* 2020;21(7):893-903.
27. Liang W, Guan W, Chen R, Wang W, Li J, Xu K, et al. Cancer patients in SARS-CoV-2 infection: a nationwide analysis in China. *Lancet Oncol.* 2020;21(3):335-7.
28. Vizcarra P, Perez-Elias MJ, Quereda C, Moreno A, Vivancos MJ, Drona F, et al. Description of COVID-19 in HIV-infected individuals: a single-centre, prospective cohort. *Lancet HIV.* 2020;7(8):e554-e64.
29. Baillie JK, Wilson JF, Bulteel N, Hayward C, Klaric L, Porteous DJ, et al. Mapping the human genetic architecture of COVID-19. *Nature.* 2021.
30. Shelton JF, Shastri AJ, Ye C, Weldon CH, Filshtein-Somnez T, Coker D, et al. Trans-ethnic analysis reveals genetic and non-genetic associations with COVID-19 susceptibility and severity. *MedRxiv [Preprint].* 2020.
31. Ellinghaus D, Degenhardt F, Bujanda L, Buti M, Albillos A, Invernizzi P, et al. Genomewide association study of severe covid-19 with respiratory failure/[...]. *New England Journal of Medicine Boston: Massachusetts Medical Society,* 2020, vol 383, no 16. 2020.
32. Hoffmann M, Kleine-Weber H, Schroeder S, Krüger N, Herrler T, Erichsen S, et al. SARS-CoV-2 cell entry depends on ACE2 and TMPRSS2 and is blocked by a clinically proven protease inhibitor. *cell.* 2020;181(2):271-80. e8.
33. Hou Y, Zhao J, Martin W, Kallianpur A, Chung MK, Jehi L, et al. New insights into genetic susceptibility of COVID-19: an ACE2 and TMPRSS2 polymorphism analysis. *BMC medicine.* 2020;18(1):1-8.
34. Barbry P, Muus C, Luecken M, Eraslan G, Waghray A, Heimberg G, et al. Integrated analyses of single-cell atlases reveal age, gender, and smoking status associations with cell type-specific expression of mediators of SARS-CoV-2 viral entry and highlights inflammatory programs in putative target cells. *BioRxiv [Preprint].* 2020.
35. Prakrithi P, Lakra P, Sundar D, Kapoor M, Mukerji M, Gupta I, et al. Genetic Risk Prediction of COVID-19 Susceptibility and Severity in the Indian Population. *Front Genet.* 2021;12:714185.
36. Huang QM, Zhang PD, Li ZH, Zhou JM, Liu D, Zhang XR, et al. Genetic Risk and Chronic Obstructive Pulmonary Disease Independently Predict the Risk of Incident Severe COVID-19. *Ann Am Thorac Soc.* 2022;19(1):58-65.
37. Zhou Y, Qian X, Liu Z, Yang H, Liu T, Chen K, et al. Coagulation factors and the incidence of COVID-19 severity: Mendelian randomization analyses and supporting evidence. *Signal Transduct Target Ther.* 2021;6(1):222.
38. Payne S. Family Coronaviridae. *Viruses* 2017. p. 149-58.

- 1
  - 2
  - 3
  - 4
  - 5
  - 6
  - 7
  - 8
  - 9
  - 10
  - 11
  - 12
  - 13
  - 14
  - 15
  - 16
  - 17
  - 18
  - 19
  - 20
  - 21
  - 22
  - 23
  - 24
  - 25
  - 26
  - 27
  - 28
  - 29
  - 30
  - 31
  - 32
  - 33
  - 34
  - 35
  - 36
  - 37
  - 38
  - 39
  - 40
  - 41
  - 42
  - 43
  - 44
  - 45
  - 46
  - 47
  - 48
  - 49
  - 50
  - 51
  - 52
  - 53
  - 54
  - 55
  - 56
  - 57
  - 58
  - 59
  - 60
39. Masters PS, Kuo L, Ye R, Hurst KR, Koetzner CA, Hsue B. Genetic and molecular biological analysis of protein-protein interactions in coronavirus assembly. *Adv Exp Med Biol.* 2006;581:163-73.
40. Khailany RA, Safdar M, Ozaslan M. Genomic characterization of a novel SARS-CoV-2. *Gene Rep.* 2020;19:100682.
41. Thoms M, Buschauer R, Ameismeier M, Koepke L, Denk T, Hirschenberger M, et al. Structural basis for translational shutdown and immune evasion by the Nsp1 protein of SARS-CoV-2. *Science.* 2020;369(6508):1249-55.
42. Schubert K, Karousis ED, Jomaa A, Scaiola A, Echeverria B, Gurzeler LA, et al. SARS-CoV-2 Nsp1 binds the ribosomal mRNA channel to inhibit translation. *Nat Struct Mol Biol.* 2020;27(10):959-66.
43. Huang C, Lokugamage KG, Rozovics JM, Narayanan K, Semler BL, Makino S. SARS coronavirus nsp1 protein induces template-dependent endonucleolytic cleavage of mRNAs: viral mRNAs are resistant to nsp1-induced RNA cleavage. *PLoS Pathog.* 2011;7(12):e1002433.
44. Snijder EJ, Decroly E, Ziebuhr J. The Nonstructural Proteins Directing Coronavirus RNA Synthesis and Processing. *Adv Virus Res.* 2016;96:59-126.
45. V'Kovski P, Gerber M, Kelly J, Pfaender S, Ebert N, Braga Lagache S, et al. Determination of host proteins composing the microenvironment of coronavirus replicase complexes by proximity-labeling. *Elife.* 2019;8.
46. Masters PS. The molecular biology of coronaviruses. *Advances in virus research.* 2006;66:193-292.
47. Siu Y, Teoh K, Lo J, Chan C, Kien F, Escriou N, et al. The M, E, and N structural proteins of the severe acute respiratory syndrome coronavirus are required for efficient assembly, trafficking, and release of virus-like particles. *Journal of virology.* 2008;82(22):11318-30.
48. Kuo L, Masters PS. Genetic evidence for a structural interaction between the carboxy termini of the membrane and nucleocapsid proteins of mouse hepatitis virus. *J Virol.* 2002;76(10):4987-99.
49. Hulswit RJ, de Haan CA, Bosch BJ. Coronavirus Spike Protein and Tropism Changes. *Adv Virus Res.* 2016;96:29-57.
50. Konno Y, Kimura I, Uriu K, Fukushi M, Irie T, Koyanagi Y, et al. SARS-CoV-2 ORF3b Is a Potent Interferon Antagonist Whose Activity Is Increased by a Naturally Occurring Elongation Variant. *Cell Rep.* 2020;32(12):108185.
51. Kopecky-Bromberg SA, Martinez-Sobrido L, Frieman M, Baric RA, Palese P. Severe acute respiratory syndrome coronavirus open reading frame (ORF) 3b, ORF 6, and nucleocapsid proteins function as interferon antagonists. *J Virol.* 2007;81(2):548-57.
52. Xia H, Cao Z, Xie X, Zhang X, Chen JY, Wang H, et al. Evasion of Type I Interferon by SARS-CoV-2. *Cell Rep.* 2020;33(1):108234.
53. Wong HH, Fung TS, Fang S, Huang M, Le MT, Liu DX. Accessory proteins 8b and 8ab of severe acute respiratory syndrome coronavirus suppress the interferon signaling pathway by mediating ubiquitin-dependent rapid degradation of interferon regulatory factor 3. *Virology.* 2018;515:165-75.
54. Azad GK, Khan PK. Variations in Orf3a protein of SARS-CoV-2 alter its structure and function. *Biochem Biophys Rep.* 2021;26:100933.

- 1
- 2
- 3
- 4 55. Ren Y, Shu T, Wu D, Mu J, Wang C, Huang M, et al. The ORF3a protein of SARS-
- 5 CoV-2 induces apoptosis in cells. *Cell Mol Immunol.* 2020;17(8):881-3.
- 6 56. Kreimendahl S, Rassow J. The Mitochondrial Outer Membrane Protein Tom70-
- 7 Mediator in Protein Traffic, Membrane Contact Sites and Innate Immunity. *Int J Mol*
- 8 *Sci.* 2020;21(19).
- 9 57. Gordon DE, Jang GM, Bouhaddou M, Xu J, Obernier K, White KM, et al. A SARS-
- 10 CoV-2 protein interaction map reveals targets for drug repurposing. *Nature.*
- 11 2020;583(7816):459-68.
- 12 58. Dominguez Andres A, Feng Y, Campos AR, Yin J, Yang CC, James B, et al. SARS-
- 13 CoV-2 ORF9c Is a Membrane-Associated Protein that Suppresses Antiviral Responses
- 14 in Cells. *BioRxiv [Preprint].* 2020.
- 15 59. Redondo N, Zaldivar-Lopez S, Garrido JJ, Montoya M. SARS-CoV-2 Accessory
- 16 Proteins in Viral Pathogenesis: Knowns and Unknowns. *Front Immunol.*
- 17 2021;12:708264.
- 18 60. Bosch BJ, van der Zee R, de Haan CA, Rottier PJ. The coronavirus spike protein is a
- 19 class I virus fusion protein: structural and functional characterization of the fusion core
- 20 complex. *J Virol.* 2003;77(16):8801-11.
- 21 61. Li F. Structure, Function, and Evolution of Coronavirus Spike Proteins. *Annu Rev*
- 22 *Virol.* 2016;3(1):237-61.
- 23 62. Wrapp D, Wang N, Corbett KS, Goldsmith JA, Hsieh CL, Abiona O, et al. Cryo-EM
- 24 structure of the 2019-nCoV spike in the prefusion conformation. *Science.*
- 25 2020;367(6483):1260-3.
- 26 63. Walls AC, Park YJ, Tortorici MA, Wall A, McGuire AT, Velesler D. Structure,
- 27 Function, and Antigenicity of the SARS-CoV-2 Spike Glycoprotein. *Cell.*
- 28 2020;181(2):281-92 e6.
- 29 64. Khare S, Azevedo M, Parajuli P, Gokulan K. Conformational Changes of the Receptor
- 30 Binding Domain of SARS-CoV-2 Spike Protein and Prediction of a B-Cell Antigenic
- 31 Epitope Using Structural Data. *Front Artif Intell.* 2021;4:630955.
- 32 65. Lan J, Ge J, Yu J, Shan S, Zhou H, Fan S, et al. Structure of the SARS-CoV-2 spike
- 33 receptor-binding domain bound to the ACE2 receptor. *Nature.* 2020;581(7807):215-20.
- 34 66. Millet JK, Whittaker GR. Host cell proteases: Critical determinants of coronavirus
- 35 tropism and pathogenesis. *Virus Res.* 2015;202:120-34.
- 36 67. Hamming I, Timens W, Bulthuis ML, Lely AT, Navis G, van Goor H. Tissue
- 37 distribution of ACE2 protein, the functional receptor for SARS coronavirus. A first step
- 38 in understanding SARS pathogenesis. *J Pathol.* 2004;203(2):631-7.
- 39 68. Glowacka I, Bertram S, Muller MA, Allen P, Soilleux E, Pfefferle S, et al. Evidence
- 40 that TMPRSS2 activates the severe acute respiratory syndrome coronavirus spike
- 41 protein for membrane fusion and reduces viral control by the humoral immune
- 42 response. *J Virol.* 2011;85(9):4122-34.
- 43 69. Zhao MM, Yang WL, Yang FY, Zhang L, Huang WJ, Hou W, et al. Cathepsin L plays
- 44 a key role in SARS-CoV-2 infection in humans and humanized mice and is a promising
- 45 target for new drug development. *Signal Transduct Target Ther.* 2021;6(1):134.
- 46 70. Hoffmann M, Kleine-Weber H, Schroeder S, Kruger N, Herrler T, Erichsen S, et al.
- 47 SARS-CoV-2 Cell Entry Depends on ACE2 and TMPRSS2 and Is Blocked by a
- 48 Clinically Proven Protease Inhibitor. *Cell.* 2020;181(2):271-80 e8.
- 49
- 50
- 51
- 52
- 53
- 54
- 55
- 56
- 57
- 58
- 59
- 60

- 1  
2  
3 71. Duchene S, Featherstone L, Haritopoulou-Sinanidou M, Rambaut A, Lemey P, Baele  
4 G. Temporal signal and the phylodynamic threshold of SARS-CoV-2. *Virus Evol.*  
5 2020;6(2):veaa061.
- 6  
7 72. Ecdc.europa.eu [Internet]. Methods for the detection and characterisation of SARS-  
8 CoV-2 variants - first update. European Centre for Disease Prevention and Control. [20  
9 December 2021; cited 7 January 2022]. Available from:  
10 [https://www.ecdc.europa.eu/en/publications-data/methods-detection-and-](https://www.ecdc.europa.eu/en/publications-data/methods-detection-and-characterisation-sars-cov-2-variants-first-update)  
11 [characterisation-sars-cov-2-variants-first-update](https://www.ecdc.europa.eu/en/publications-data/methods-detection-and-characterisation-sars-cov-2-variants-first-update)
- 12  
13 73. Cdc.gov [Internet]. COVID-19: About Variants. Centers for Disease Control and  
14 Prevention. [13 December 2021; cited 7 January 2022]. Available from:  
15 <https://www.cdc.gov/coronavirus/2019-ncov/variants/about-variants.html>
- 16  
17 74. Imperial.ac.uk [Internet]. Report 50 - Hospitalisation risk for Omicron cases in  
18 England. Imperial College London, MRC Centre for Global Infectious Disease  
19 Analysis. [22 December 2021; cited 10 January 2022]. Available from:  
20 [https://www.imperial.ac.uk/mrc-global-infectious-disease-analysis/covid-19/report-](https://www.imperial.ac.uk/mrc-global-infectious-disease-analysis/covid-19/report-50-severity-omicron/)  
21 [50-severity-omicron/](https://www.imperial.ac.uk/mrc-global-infectious-disease-analysis/covid-19/report-50-severity-omicron/)
- 22  
23 75. Gov.uk [Internet]. SARS-CoV-2 variants of concern and variants under investigation  
24 in England - Technical briefing 33. UK Health Security Agency. [23 December 2021;  
25 cited 10 January 2022]. Available from:  
26 [https://assets.publishing.service.gov.uk/government/uploads/system/uploads/attachme](https://assets.publishing.service.gov.uk/government/uploads/system/uploads/attachment_data/file/1043807/technical-briefing-33.pdf)  
27 [nt\\_data/file/1043807/technical-briefing-33.pdf](https://assets.publishing.service.gov.uk/government/uploads/system/uploads/attachment_data/file/1043807/technical-briefing-33.pdf)
- 28  
29 76. Luna-Muschi A, Borges IC, de Faria E, Barboza AS, Maia FL, Leme MD, et al. Clinical  
30 features of COVID-19 by SARS-CoV-2 Gamma variant: A prospective cohort study of  
31 vaccinated and unvaccinated healthcare workers. *J Infect.* 2021.
- 32  
33 77. Gov.uk [Internet]. Investigation of novel SARS-CoV-2 variant - Variant of Concern  
34 202012/01 - Technical briefing 5. UK Health Security Agency (formerly Public Health  
35 England). [14 January 2021; cited 10 January 2022]. Available from:  
36 [https://assets.publishing.service.gov.uk/government/uploads/system/uploads/attachme](https://assets.publishing.service.gov.uk/government/uploads/system/uploads/attachment_data/file/959426/Variant_of_Concern_VOC_202012_01_Technical_Briefing_5.pdf)  
37 [nt\\_data/file/959426/Variant\\_of\\_Concern\\_VOC\\_202012\\_01\\_Technical\\_Briefing\\_5.pdf](https://assets.publishing.service.gov.uk/government/uploads/system/uploads/attachment_data/file/959426/Variant_of_Concern_VOC_202012_01_Technical_Briefing_5.pdf)  
38  
39 f
- 40  
41 78. Wang Y, Liu M, Gao J. Enhanced receptor binding of SARS-CoV-2 through networks  
42 of hydrogen-bonding and hydrophobic interactions. *Proc Natl Acad Sci U S A.*  
43 2020;117(25):13967-74.
- 44  
45 79. Yi C, Sun X, Ye J, Ding L, Liu M, Yang Z, et al. Key residues of the receptor binding  
46 motif in the spike protein of SARS-CoV-2 that interact with ACE2 and neutralizing  
47 antibodies. *Cell Mol Immunol.* 2020;17(6):621-30.
- 48  
49 80. Starr TN, Greaney AJ, Hilton SK, Ellis D, Crawford KHD, Dingens AS, et al. Deep  
50 Mutational Scanning of SARS-CoV-2 Receptor Binding Domain Reveals Constraints  
51 on Folding and ACE2 Binding. *Cell.* 2020;182(5):1295-310 e20.
- 52  
53 81. Huang Y, Yang C, Xu XF, Xu W, Liu SW. Structural and functional properties of  
54 SARS-CoV-2 spike protein: potential antiviral drug development for COVID-19. *Acta*  
55 *Pharmacol Sin.* 2020;41(9):1141-9.
- 56  
57 82. Hoffmann M, Kleine-Weber H, Pohlmann S. A Multibasic Cleavage Site in the Spike  
58 Protein of SARS-CoV-2 Is Essential for Infection of Human Lung Cells. *Mol Cell.*  
59 2020;78(4):779-84 e5.
- 60

- 1
  - 2
  - 3
  - 4
  - 5
  - 6
  - 7
  - 8
  - 9
  - 10
  - 11
  - 12
  - 13
  - 14
  - 15
  - 16
  - 17
  - 18
  - 19
  - 20
  - 21
  - 22
  - 23
  - 24
  - 25
  - 26
  - 27
  - 28
  - 29
  - 30
  - 31
  - 32
  - 33
  - 34
  - 35
  - 36
  - 37
  - 38
  - 39
  - 40
  - 41
  - 42
  - 43
  - 44
  - 45
  - 46
  - 47
  - 48
  - 49
  - 50
  - 51
  - 52
  - 53
  - 54
  - 55
  - 56
  - 57
  - 58
  - 59
  - 60
83. Peacock TP, Goldhill DH, Zhou J, Baillon L, Frise R, Swann OC, et al. The furin cleavage site of SARS-CoV-2 spike protein is a key determinant for transmission due to enhanced replication in airway cells. *BioRxiv* [Preprint]. 2020.
84. Zhu Y, Feng F, Hu G, Wang Y, Yu Y, Zhu Y, et al. The S1/S2 boundary of SARS-CoV-2 spike protein modulates cell entry pathways and transmission. *BioRxiv* [Preprint]. 2020.
85. Scudellari M. How the coronavirus infects cells - and why Delta is so dangerous. *Nature*. 2021;595(7869):640-4.
86. Wang Q, Qiu Y, Li JY, Zhou ZJ, Liao CH, Ge XY. A Unique Protease Cleavage Site Predicted in the Spike Protein of the Novel Pneumonia Coronavirus (2019-nCoV) Potentially Related to Viral Transmissibility. *Viol Sin*. 2020;35(3):337-9.
87. Yurkovetskiy L, Wang X, Pascal KE, Tomkins-Tinch C, Nyalile TP, Wang Y, et al. Structural and Functional Analysis of the D614G SARS-CoV-2 Spike Protein Variant. *Cell*. 2020;183(3):739-51 e8.
88. McCarthy KR, Rennick LJ, Nambulli S, Robinson-McCarthy LR, Bain WG, Haidar G, et al. Natural deletions in the SARS-CoV-2 spike glycoprotein drive antibody escape. *BioRxiv* [Preprint]. 2021.
89. Kemp SA, Collier DA, Datir R, Ferreira I, Gayed S, Jahun A, et al. Neutralising antibodies in Spike mediated SARS-CoV-2 adaptation. *MedRxiv* [Preprint]. 2020.
90. Gamage AM, Tan KS, Chan WOY, Liu J, Tan CW, Ong YK, et al. Infection of human Nasal Epithelial Cells with SARS-CoV-2 and a 382-nt deletion isolate lacking ORF8 reveals similar viral kinetics and host transcriptional profiles. *PLoS Pathog*. 2020;16(12):e1009130.
91. Collier DA, De Marco A, Ferreira I, Meng B, Datir RP, Walls AC, et al. Sensitivity of SARS-CoV-2 B.1.1.7 to mRNA vaccine-elicited antibodies. *Nature*. 2021;593(7857):136-41.
92. Martínez-García L, Espinel MA, Abreu M, González-Alba JM, Gijón D, McGee A, et al. Emergence and Spread of B. 1.1. 7 Lineage in Primary Care and Clinical Impact in the Morbi-Mortality among Hospitalized Patients in Madrid, Spain. *Microorganisms*. 2021;9(7):1517.
93. Vassallo M, Manni S, Klotz C, Fabre R, Pini P, Blanchouin E, et al. Patients Admitted for Variant Alpha COVID-19 Have Poorer Outcomes than Those Infected with the Old Strain. *J Clin Med*. 2021;10(16).
94. McAlister FA, Nabipoor M, Chu A, Lee DS, Saxinger L, Bakal JA. Lessons from the COVID-19 third wave in Canada: the impact of variants of concern and shifting demographics. *MedRxiv* [Preprint]. 2021.
95. Davies NG, Abbott S, Barnard RC, Jarvis CI, Kucharski AJ, Munday JD, et al. Estimated transmissibility and impact of SARS-CoV-2 lineage B.1.1.7 in England. *Science*. 2021;372(6538).
96. Leung K, Shum MH, Leung GM, Lam TT, Wu JT. Early transmissibility assessment of the N501Y mutant strains of SARS-CoV-2 in the United Kingdom, October to November 2020. *Euro Surveill*. 2021;26(1).
97. Zhao S, Lou J, Cao L, Zheng H, Chong MKC, Chen Z, et al. Quantifying the transmission advantage associated with N501Y substitution of SARS-CoV-2 in the UK: an early data-driven analysis. *J Travel Med*. 2021;28(2).

- 1  
2  
3 98. Gov.uk [Internet]. NERVTAG paper on COVID-19 variant of concern B.1.1.7.  
4 NERVTAG - COVID-19 Public statements. [22 January 2021; cited 7 October 2021]  
5 Available from:  
6 [https://assets.publishing.service.gov.uk/government/uploads/system/uploads/attachme](https://assets.publishing.service.gov.uk/government/uploads/system/uploads/attachment_data/file/961037/NERVTAG_note_on_B.1.1.7_severity_for_SAGE_77__1_.pdf)  
7 [nt\\_data/file/961037/NERVTAG\\_note\\_on\\_B.1.1.7\\_severity\\_for\\_SAGE\\_77\\_\\_1\\_.pdf](https://assets.publishing.service.gov.uk/government/uploads/system/uploads/attachment_data/file/961037/NERVTAG_note_on_B.1.1.7_severity_for_SAGE_77__1_.pdf)  
8
- 9 99. Challen R, Brooks-Pollock E, Read JM, Dyson L, Tsaneva-Atanasova K, Danon L.  
10 Risk of mortality in patients infected with SARS-CoV-2 variant of concern 202012/1:  
11 matched cohort study. *BMJ*. 2021;372:n579.  
12
- 13 100. Paredes MI, Lunn SM, Famulare M, Frisbie LA, Painter I, Burstein R, et al.  
14 Associations between SARS-CoV-2 variants and risk of COVID-19 hospitalization  
15 among confirmed cases in Washington State: a retrospective cohort study. *MedRxiv*  
16 [Preprint]. 2021.  
17
- 18 101. Wang P, Nair MS, Liu L, Iketani S, Luo Y, Guo Y, et al. Antibody Resistance  
19 of SARS-CoV-2 Variants B.1.351 and B.1.1.7. *BioRxiv* [Preprint].  
20 2021:2021.01.25.428137.  
21
- 22 102. Wu K, Werner AP, Moliva JI, Koch M, Choi A, Stewart-Jones GBE, et al.  
23 mRNA-1273 vaccine induces neutralizing antibodies against spike mutants from global  
24 SARS-CoV-2 variants. *BioRxiv* [Preprint]. 2021.  
25
- 26 103. Gallais F, Gantner P, Bruel T, Velay A, Planas D, Wendling M-J, et al. Anti-  
27 SARS-CoV-2 Antibodies Persist for up to 13 Months and Reduce Risk of Reinfection.  
28 *MedRxiv* [Preprint]. 2021.  
29
- 30 104. [Ecdc.europa.eu](https://ecdc.europa.eu/en/covid-19/variants-concern) [Internet]. SARS-CoV-2 variants of concern as of 20 January  
31 2022. European Centre for Disease Prevention and Control. [20 January 2022; cited 24  
32 January 2022] Available from: [https://www.ecdc.europa.eu/en/covid-19/variants-](https://www.ecdc.europa.eu/en/covid-19/variants-concern)  
33 [concern](https://www.ecdc.europa.eu/en/covid-19/variants-concern)  
34
- 35 105. Gu H, Chen Q, Yang G, He L, Fan H, Deng YQ, et al. Adaptation of SARS-  
36 CoV-2 in BALB/c mice for testing vaccine efficacy. *Science*. 2020;369(6511):1603-7.  
37
- 38 106. Plante JA, Liu Y, Liu J, Xia H, Johnson BA, Lokugamage KG, et al. Spike  
39 mutation D614G alters SARS-CoV-2 fitness. *Nature*. 2021;592(7852):116-21.  
40
- 41 107. Pearson CA, Russell TW, Davies NG, Kucharski AJ, group CC-w, Edmunds  
42 WJ, et al. Estimates of severity and transmissibility of novel South Africa SARS-CoV-2  
43 variant 501Y.V2. Centre for Mathematical Modelling of Infectious Diseases. *CMMID*  
44 Repository [Preprint]. 2021.  
45
- 46 108. Wibmer CK, Ayres F, Hermanus T, Madzivhandila M, Kgagudi P, Oosthuysen  
47 B, et al. SARS-CoV-2 501Y.V2 escapes neutralization by South African COVID-19  
48 donor plasma. *Nat Med*. 2021;27(4):622-5.  
49
- 50 109. Sinha S, Tam B, Wang SM. Altered interaction between RBD and ACE2  
51 receptor contributes towards the increased transmissibility of SARS CoV-2 delta,  
52 kappa, beta, and gamma strains with RBD double mutations. *BioRxiv* [Preprint]. 2021.  
53
- 54 110. Campbell F, Archer B, Laurenson-Schafer H, Jinnai Y, Konings F, Batra N, et  
55 al. Increased transmissibility and global spread of SARS-CoV-2 variants of concern as  
56 at June 2021. *Euro Surveill*. 2021;26(24).  
57
- 58 111. [Ecdc.europa.eu](https://ecdc.europa.eu/en/covid-19/variants-concern) [Internet]. Risk assessment: SARS-CoV-2 - increased  
59 circulation of variants of concern and vaccine rollout in the EU/EEA, 14th update.  
60 European Centre for Disease Prevention and Control. [15 February 2021; cited 8



- October 2021] Available from: <https://www.ecdc.europa.eu/en/publications-data/covid-19-risk-assessment-variants-vaccine-fourteenth-update-february-2021>
112. Khan A, Zia T, Suleman M, Khan T, Ali SS, Abbasi AA, et al. Higher infectivity of the SARS-CoV-2 new variants is associated with K417N/T, E484K, and N501Y mutants: An insight from structural data. *J Cell Physiol.* 2021;236(10):7045-57.
  113. Baum A, Fulton BO, Wloga E, Copin R, Pascal KE, Russo V, et al. Antibody cocktail to SARS-CoV-2 spike protein prevents rapid mutational escape seen with individual antibodies. *Science.* 2020;369(6506):1014-8.
  114. Curran J, Dol J, Boulos L, Somerville M, McCulloch H, MacDonald M, et al. Transmission characteristics of SARS-CoV-2 variants of concern. *MedRxiv [Preprint].* 2021.
  115. de Faria E, Guedes AR, Oliveira MS, de Godoy Moreira MV, Maia FL, dos Santos Barboza A, et al. Performance of vaccination with CoronaVac in a cohort of healthcare workers (HCW) - preliminary report. *MedRxiv [Preprint].* 2021.
  116. Freitas ARR, Beckedorff OA, Cavalcanti LPG, Siqueira AM, Castro DB, Costa CFD, et al. The emergence of novel SARS-CoV-2 variant P.1 in Amazonas (Brazil) was temporally associated with a change in the age and sex profile of COVID-19 mortality: A population based ecological study. *Lancet Reg Health Am.* 2021;1:100021.
  117. Funk T, Pharris A, Spiteri G, Bundle N, Melidou A, Carr M, et al. Characteristics of SARS-CoV-2 variants of concern B.1.1.7, B.1.351 or P.1: data from seven EU/EEA countries, weeks 38/2020 to 10/2021. *Euro Surveill.* 2021;26(16).
  118. Sabino EC, Buss LF, Carvalho MPS, Prete CA, Jr., Crispim MAE, Fraiji NA, et al. Resurgence of COVID-19 in Manaus, Brazil, despite high seroprevalence. *Lancet.* 2021;397(10273):452-5.
  119. Dejnirattisai W, Zhou D, Supasa P, Liu C, Mentzer AJ, Ginn HM, et al. Antibody evasion by the P.1 strain of SARS-CoV-2. *Cell.* 2021;184(11):2939-54 e9.
  120. Korber B, Fischer WM, Gnanakaran S, Yoon H, Theiler J, Abfalterer W, et al. Tracking Changes in SARS-CoV-2 Spike: Evidence that D614G Increases Infectivity of the COVID-19 Virus. *Cell.* 2020;182(4):812-27 e19.
  121. Volz E, Hill V, McCrone JT, Price A, Jorgensen D, O'Toole A, et al. Evaluating the Effects of SARS-CoV-2 Spike Mutation D614G on Transmissibility and Pathogenicity. *Cell.* 2021;184(1):64-75 e11.
  122. Augusto G, Mohsen MO, Zinkhan S, Liu X, Vogel M, Bachmann MF. In vitro data suggest that Indian delta variant B.1.617 of SARS-CoV-2 escapes neutralization by both receptor affinity and immune evasion. *Allergy.* 2021.
  123. Tchesnokova V, Kulakesara H, Larson L, Bowers V, Rechkina E, Kisiela D, et al. Acquisition of the L452R mutation in the ACE2-binding interface of Spike protein triggers recent massive expansion of SARS-Cov-2 variants. *BioRxiv [Preprint].* 2021.
  124. Li Q, Wu J, Nie J, Zhang L, Hao H, Liu S, et al. The Impact of Mutations in SARS-CoV-2 Spike on Viral Infectivity and Antigenicity. *Cell.* 2020;182(5):1284-94 e9.
  125. Di Giacomo S, Mercatelli D, Rakhimov A, Giorgi FM. Preliminary report on severe acute respiratory syndrome coronavirus 2 (SARS-CoV-2) Spike mutation T478K. *J Med Virol.* 2021;93(9):5638-43.

126. Torjesen I. Covid-19: Delta variant is now UK's most dominant strain and spreading through schools. *BMJ*. 2021;373:n1445.
127. Reuters.com [Internet]. Delta COVID variant now dominant strain worldwide, U.S. deaths surge -officials. O'donnell C, Mason J, Reuters. [16 July 2021; cited 6 January 2022]. Available from: [www.reuters.com](http://www.reuters.com)
128. Euro.who.int [Internet]. SARS-CoV-2 Delta variant now dominant in much of European region; efforts must be reinforced to prevent transmission, warns WHO Regional Office for Europe and ECDC. World Health Organisation. [23 July 2021; cited 11 October 2021]. Available from: <https://www.euro.who.int/en/media-centre/sections/press-releases/2021/sars-cov-2-delta-variant-now-dominant-in-much-of-european-region-efforts-must-be-reinforced-to-prevent-transmission,-warns-who-regional-office-for-europe-and-ecdc>
129. Li B, Deng A, Li K, Hu Y, Li Z, Xiong Q, et al. Viral infection and transmission in a large, well-traced outbreak caused by the SARS-CoV-2 Delta variant *MedRxiv* [Preprint]. 2021.
130. Teyssou E, Delagreverie H, Visseaux B, Lambert-Niclot S, Briclher S, Ferre V, et al. The Delta SARS-CoV-2 variant has a higher viral load than the Beta and the historical variants in nasopharyngeal samples from newly diagnosed COVID-19 patients. *J Infect*. 2021;83(4):e1-e3.
131. Kumar A, Asghar A, Raza K, Narayan RK, Jha RK, Satyam A, et al. Demographic characteristics of SARS-CoV-2 B.1.617.2 (Delta) variant infections in Indian population. *MedRxiv* [Preprint]. 2021.
132. Planas D, Veyer D, Baidaliuk A, Staropoli I, Guivel-Benhassine F, Rajah MM, et al. Reduced sensitivity of SARS-CoV-2 variant Delta to antibody neutralization. *Nature*. 2021;596(7871):276-80.
133. Sheikh A, McMenamin J, Taylor B, Robertson C, Public Health S, the EIIC. SARS-CoV-2 Delta VOC in Scotland: demographics, risk of hospital admission, and vaccine effectiveness. *Lancet*. 2021;397(10293):2461-2.
134. Fisman DN, Tuite AR. Progressive Increase in Virulence of Novel SARS-CoV-2 Variants in Ontario, Canada. *MedRxiv* [Preprint]. 2021.
135. Cameroni E, Saliba C, Bowen JE, Rosen LE, Culap K, Pinto D, et al. Broadly neutralizing antibodies overcome SARS-CoV-2 Omicron antigenic shift. *BioRxiv* [Preprint]. 2021.
136. Shah M, Woo HG. Omicron: A heavily mutated SARS-CoV-2 variant exhibits stronger binding to ACE2 and potently escape approved COVID-19 therapeutic antibodies. *BioRxiv* [Preprint]. 2021.
137. Wolter N, Jassat W, Walaza S, Welch R, Moultrie H, Groome M, et al. Early assessment of the clinical severity of the SARS-CoV-2 Omicron variant in South Africa. *MedRxiv* [Preprint]. 2021.
138. Gov.uk [Internet]. Omicron daily overview: 24 December 2021. UK Health Security Agency. [24 December 2021; cited 4 January 2022]. Available from: [https://assets.publishing.service.gov.uk/government/uploads/system/uploads/attachment\\_data/file/1043866/20211224\\_OS\\_Daily\\_Omicron\\_Overview.pdf](https://assets.publishing.service.gov.uk/government/uploads/system/uploads/attachment_data/file/1043866/20211224_OS_Daily_Omicron_Overview.pdf)
139. Who.int [Internet]. Enhancing readiness for Omicron (B.1.1.529): Technical brief and priority actions for Member States. World Health Organisation. [23 December 2021; cited 4 January 2022]. Available from: <https://www.who.int/docs/default->

- source/coronaviruse/2021-12-23-global-technical-brief-and-priority-action-on-omicron.pdf?sfvrsn=d0e9fb6c\_8
140. Med.hku.hk [Internet]. HKUMed finds Omicron SARS-CoV-2 can infect faster and better than Delta in human bronchus but with less severe infection in lung. The University of Hong Kong, LKS Faculty of Medicine. [15 December 2021; cited 5 January 2022]. Available from: <https://www.med.hku.hk/en/news/press/20211215-omicron-sars-cov-2-infection>
  141. Sheikh A, Kerr S, Woolhouse M, McMenamin J, C. R. Severity of Omicron variant of concern and vaccine effectiveness against symptomatic disease: national cohort with nested test negative design study in Scotland. 2021.
  142. Pulliam JRC, van Schalkwyk C, Govender N, von Gottberg A, Cohen C, Groome MJ, et al. Increased risk of SARS-CoV-2 reinfection associated with emergence of the Omicron variant in South Africa. *MedRxiv* [Preprint]. 2021.
  143. Sandile Cele, Laurelle Jackson, Khadija Khan, David Khoury, Thandeka Moyogwete, Houriiyah Tegally, et al. SARS-CoV-2 Omicron has extensive but incomplete escape of Pfizer BNT162b2 elicited neutralization and requires ACE2 for infection. *MedRxiv* [Preprint]. 2021.
  144. Planas D, Saunders N, Maes P, Guivel-Benhassine F, Planchais C, Buchrieser J, et al. Considerable escape of SARS-CoV-2 variant Omicron to antibody neutralization. *BioRxiv* [Preprint]. 2021.
  145. Meng B, Ferreira IATM, Abdullahi A, Saito A, Kimura I, Yamasoba D, et al. SARS-CoV-2 Omicron spike mediated immune escape, infectivity and cell-cell fusion. *BioRxiv* [Preprint]. 2021.
  146. Pfizer.com [Internet]. Pfizer and BioNTech Provide Update on Omicron Variant. Pfizer. [8 December 2021; cited 4 January 2022]. Available from: <https://www.pfizer.com/news/press-release/press-release-detail/pfizer-and-biontech-provide-update-omicron-variant>
  147. Keeton R, Tincho MB, Ngomti A, Baguma R, Benede N, Suzuki A, et al. SARS-CoV-2 spike T cell responses induced upon vaccination or infection remain robust against Omicron. *MedRxiv* [Preprint]. 2021.
  148. Sacoronavirus.co.za [Internet]. Cabinet approves changes to covid-19 regulations. South Africa Department of Health. [30 December 2021; cited 7 January 2022]. Available from: <https://sacoronavirus.co.za/2021/12/30/media-release-cabinet-approves-changes-to-covid-19-regulations/>
  149. Taylor L. Covid-19: Omicron drives weekly record high in global infections. *BMJ*. 2022;376:o66.
  150. Tada T, Zhou H, Dcosta BM, Samanovic MI, Mulligan MJ, Landau NR. SARS-CoV-2 Lambda Variant Remains Susceptible to Neutralization by mRNA Vaccine-elicited Antibodies and Convalescent Serum. *BioRxiv* [Preprint]. 2021.
  151. Acevedo ML, Alonso-Palomares L, Bustamante A, Gaggero A, Paredes F, Cortés CP, et al. Infectivity and immune escape of the new SARS-CoV-2 variant of interest Lambda. *MedRxiv* [Preprint]. 2021.
  152. Laiton-Donato K, Franco-Munoz C, Alvarez-Diaz DA, Ruiz-Moreno HA, Usme-Ciro JA, Prada DA, et al. Characterization of the emerging B.1.621 variant of interest of SARS-CoV-2. *Infect Genet Evol*. 2021;95:105038.

153. Chen J, Gao K, Wang R, Wei GW. Revealing the Threat of Emerging SARS-CoV-2 Mutations to Antibody Therapies. *J Mol Biol.* 2021;433(18):167155.
154. Amanat F, Krammer F. SARS-CoV-2 vaccines: status report. *Immunity.* 2020;52(4):583-9.
155. Who.int [Internet]. COVID-19 vaccine tracker and landscape. World Health Organisation. [25 January 2022; cited 26 January 2022]. Available from: <https://www.who.int/publications/m/item/draft-landscape-of-covid-19-candidate-vaccines>
156. Polack FP, Thomas SJ, Kitchin N, Absalon J, Gurtman A, Lockhart S, et al. Safety and Efficacy of the BNT162b2 mRNA Covid-19 Vaccine. *N Engl J Med.* 2020;383(27):2603-15.
157. Wrapp D, Wang N, Corbett KS, Goldsmith JA, Hsieh C-L, Abiona O, et al. Cryo-EM structure of the 2019-nCoV spike in the prefusion conformation. *Science.* 2020;367(6483):1260-3.
158. Who.int [Internet]. Coronavirus disease (COVID-19): Vaccines. World Health Organisation. [20 January 2022; cited 26 January 2022]. Available from: [https://www.who.int/news-room/questions-and-answers/item/coronavirus-disease-\(covid-19\)-vaccines](https://www.who.int/news-room/questions-and-answers/item/coronavirus-disease-(covid-19)-vaccines)
159. Sahin U, Muik A, Vogler I, Derhovanessian E, Kranz LM, Vormehr M, et al. BNT162b2 vaccine induces neutralizing antibodies and poly-specific T cells in humans. *Nature.* 2021;595(7868):572-7.
160. Arunachalam PS, Scott MKD, Hagan T, Li C, Feng Y, Wimmers F, et al. Systems vaccinology of the BNT162b2 mRNA vaccine in humans. *Nature.* 2021;596(7872):410-6.
161. Walsh EE, Frenck RW, Jr., Falsey AR, Kitchin N, Absalon J, Gurtman A, et al. Safety and Immunogenicity of Two RNA-Based Covid-19 Vaccine Candidates. *N Engl J Med.* 2020;383(25):2439-50.
162. Appelman B, van der Straten K, Lavell AHA, Schinkel M, Slim MA, Poniman M, et al. Time since SARS-CoV-2 infection and humoral immune response following BNT162b2 mRNA vaccination. *EBioMedicine.* 2021;72:103589.
163. Beatty AL, Peyser ND, Butcher XE, Cocohoba JM, Lin F, Olgin JE, et al. Analysis of COVID-19 Vaccine Type and Adverse Effects Following Vaccination. *JAMA Netw Open.* 2021;4(12):e2140364.
164. Vizcarra P, Haemmerle J, Velasco H, Velasco T, Fernandez-Escribano M, Vallejo A, et al. BNT162b2 mRNA COVID-19 vaccine Reactogenicity: The key role of immunity. *Vaccine.* 2021;39(51):7367-74.
165. Salmeron Rios S, Mas Romero M, Cortes Zamora EB, Tabernero Sahuquillo MT, Romero Rijos L, Sanchez-Jurado PM, et al. Immunogenicity of the BNT162b2 vaccine in frail or disabled nursing home residents: COVID-A study. *J Am Geriatr Soc.* 2021;69(6):1441-7.
166. Barda N, Dagan N, Ben-Shlomo Y, Kepten E, Waxman J, Ohana R, et al. Safety of the BNT162b2 mRNA Covid-19 Vaccine in a Nationwide Setting. *N Engl J Med.* 2021;385(12):1078-90.
167. Sharma O, Sultan AA, Ding H, Trigg CR. A Review of the Progress and Challenges of Developing a Vaccine for COVID-19. *Front Immunol.* 2020;11:585354.

168. Who.int [Internet]. WHO lists two additional COVID-19 vaccines for emergency use and COVAX roll-out. World Health Organisation. [15 February 2021; cited 13 October 2021]. Available from: <https://www.who.int/news/item/15-02-2021-who-lists-two-additional-covid-19-vaccines-for-emergency-use-and-covax-roll-out>
169. Ewer KJ, Barrett JR, Belij-Rammerstorfer S, Sharpe H, Makinson R, Morter R, et al. T cell and antibody responses induced by a single dose of ChAdOx1 nCoV-19 (AZD1222) vaccine in a phase 1/2 clinical trial. *Nat Med*. 2021;27(2):270-8.
170. Folegatti PM, Ewer KJ, Aley PK, Angus B, Becker S, Belij-Rammerstorfer S, et al. Safety and immunogenicity of the ChAdOx1 nCoV-19 vaccine against SARS-CoV-2: a preliminary report of a phase 1/2, single-blind, randomised controlled trial. *Lancet*. 2020;396(10249):467-78.
171. Al Khames Aga QA, Alkhaffaf WH, Hatem TH, Nassir KF, Batineh Y, Dahham AT, et al. Safety of COVID-19 vaccines. *J Med Virol*. 2021;93(12):6588-94.
172. Sadoff J, Gray G, Vandebosch A, Cardenas V, Shukarev G, Grinsztejn B, et al. Safety and Efficacy of Single-Dose Ad26.COV2.S Vaccine against Covid-19. *N Engl J Med*. 2021;384(23):2187-201.
173. Alter G, Yu J, Liu J, Chandrashekar A, Borducchi EN, Tostanoski LH, et al. Immunogenicity of Ad26.COV2.S vaccine against SARS-CoV-2 variants in humans. *Nature*. 2021;596(7871):268-72.
174. Sadoff J, Le Gars M, Shukarev G, Heerwegh D, Truyers C, de Groot AM, et al. Interim Results of a Phase 1-2a Trial of Ad26.COV2.S Covid-19 Vaccine. *N Engl J Med*. 2021;384(19):1824-35.
175. Keeton R, Richardson SI, Moyo-Gwete T, Hermanus T, Tincho MB, Benede N, et al. Prior infection with SARS-CoV-2 boosts and broadens Ad26.COV2.S immunogenicity in a variant-dependent manner. *Cell Host Microbe*. 2021;29(11):1611-9 e5.
176. See I, Su JR, Lale A, Woo EJ, Guh AY, Shimabukuro TT, et al. US Case Reports of Cerebral Venous Sinus Thrombosis With Thrombocytopenia After Ad26.COV2.S Vaccination, March 2 to April 21, 2021. *JAMA*. 2021;325(24):2448-56.
177. Baden LR, El Sahly HM, Essink B, Kotloff K, Frey S, Novak R, et al. Efficacy and Safety of the mRNA-1273 SARS-CoV-2 Vaccine. *N Engl J Med*. 2021;384(5):403-16.
178. Mukhopadhyay L, Yadav PD, Gupta N, Mohandas S, Patil DY, Shete-Aich A, et al. Comparison of the immunogenicity & protective efficacy of various SARS-CoV-2 vaccine candidates in non-human primates. *Indian J Med Res*. 2021;153(1 & 2):93-114.
179. Anderson EJ, Roupheal NG, Widge AT, Jackson LA, Roberts PC, Makhene M, et al. Safety and Immunogenicity of SARS-CoV-2 mRNA-1273 Vaccine in Older Adults. *N Engl J Med*. 2020;383(25):2427-38.
180. Jackson LA, Anderson EJ, Roupheal NG, Roberts PC, Makhene M, Coler RN, et al. An mRNA Vaccine against SARS-CoV-2 - Preliminary Report. *N Engl J Med*. 2020;383(20):1920-31.
181. Chu L, McPhee R, Huang W, Bennett H, Pajon R, Nestorova B, et al. A preliminary report of a randomized controlled phase 2 trial of the safety and immunogenicity of mRNA-1273 SARS-CoV-2 vaccine. *Vaccine*. 2021;39(20):2791-9.
182. Who.int [Internet]. Interim recommendations for use of the inactivated COVID-19 vaccine BIBP developed by China National Biotec Group (CNBG), Sinopharm.

- World Health Organisation. [28 October 2021; cited 7 January 2022]. Available from: <https://www.who.int/publications/i/item/WHO-2019-nCoV-vaccines-SAGE-recommendation-BIBP>
183. Who.int [Internet]. Background document on the inactivated vaccine Sinovac-CoronaVac against COVID-19. World Health Organisation. [1 June 2021; cited 13 October 2021]. Available from: [https://www.who.int/publications/i/item/WHO-2019-nCoV-vaccines-SAGE\\_recommendation-Sinovac-CoronaVac-background-2021.1](https://www.who.int/publications/i/item/WHO-2019-nCoV-vaccines-SAGE_recommendation-Sinovac-CoronaVac-background-2021.1)
184. Who.int [Internet]. Background document on the Bharat Biotech BBV152 COVAXIN® (COVID-19) vaccine. World Health Organisation. [3 November 2021; cited 7 January 2022]. Available from: <https://www.who.int/publications/i/item/WHO-2019-nCoV-vaccines-SAGE-recommendation-bbv152-covaxin-background>
185. Who.int [Internet]. WHO issues emergency use listing for eighth COVID-19 vaccine. World Health Organisation. [3 November 2021; cited 7 January 2022]. Available from: <https://www.who.int/news/item/03-11-2021-who-issues-emergency-use-listing-for-eighth-covid-19-vaccine>
186. Who.int [Internet]. WHO lists 9th COVID-19 vaccine for emergency use with aim to increase access to vaccination in lower-income countries. World Health Organisation. [17 December 2021; cited 7 January 2022]. Available from: <https://www.who.int/news/item/17-12-2021-who-lists-9th-covid-19-vaccine-for-emergency-use-with-aim-to-increase-access-to-vaccination-in-lower-income-countries>
187. Who.int [Internet]. WHO lists 10th COVID-19 vaccine for emergency use: Nuvaxovid. World Health Organisation. [21 December 2021; cited 7 January 2022]. Available from: <https://www.who.int/news/item/21-12-2021-who-lists-10th-covid-19-vaccine-for-emergency-use-nuvaxovid>
188. Who.int [Internet]. Interim recommendations for use of the Novavax NVX-CoV2373 vaccine against COVID-19. World Health Organisation. [20 December 2021; cited 7 January 2022]. Available from: <https://www.who.int/publications/i/item/WHO-2019-nCoV-vaccines-SAGE-recommendation-novavax-nvx-cov2373>
189. Mishra SK, Pradhan SK, Pati S, Sahu S, Nanda RK. Waning of Anti-spike Antibodies in AZD1222 (ChAdOx1) Vaccinated Healthcare Providers: A Prospective Longitudinal Study. *Cureus*. 2021;13(11):e19879.
190. Tre-Hardy M, Cupaiolo R, Wilmet A, Antoine-Moussiaux T, Della Vecchia A, Horeanga A, et al. Immunogenicity of mRNA-1273 COVID vaccine after 6 months surveillance in health care workers; a third dose is necessary. *J Infect*. 2021;83(5):559-64.
191. Shrotri M, Navaratnam AMD, Nguyen V, Byrne T, Geismar C, Fragaszy E, et al. Spike-antibody waning after second dose of BNT162b2 or ChAdOx1. *Lancet*. 2021;398(10298):385-7.
192. Chemaitelly H, Tang P, Hasan MR, AlMukdad S, Yassine HM, Benslimane FM, et al. Waning of BNT162b2 Vaccine Protection against SARS-CoV-2 Infection in Qatar. *N Engl J Med*. 2021.
193. Mizrahi B, Lotan R, Kalkstein N, Peretz A, Perez G, Ben-Tov A, et al. Correlation of SARS-CoV-2 Breakthrough Infections to Time-from-vaccine; Preliminary Study. *MedRxiv [Preprint]*. 2021.

194. Thomas SJ, Moreira ED, Kitchin N, Absalon J, Gurtman A, Lockhart S, et al. Six Month Safety and Efficacy of the BNT162b2 mRNA COVID-19 Vaccine. *MedRxiv [Preprint]*. 2021.
195. Tre-Hardy M, Cupaiolo R, Wilmet A, Antoine-Moussiaux T, Della Vecchia A, Horeanga A, et al. Six-month interim analysis of ongoing immunogenicity surveillance of the mRNA-1273 vaccine in healthcare workers: A third dose is expected. *J Infect*. 2021.
196. Almendro-Vazquez P, Laguna-Goya R, Ruiz-Ruigomez M, Utrero-Rico A, Lalueza A, Maestro de la Calle G, et al. Longitudinal dynamics of SARS-CoV-2-specific cellular and humoral immunity after natural infection or BNT162b2 vaccination. *PLoS Pathog*. 2021;17(12):e1010211.
197. Cohen KW, Linderman SL, Moodie Z, Czartoski J, Lai L, Mantus G, et al. Longitudinal analysis shows durable and broad immune memory after SARS-CoV-2 infection with persisting antibody responses and memory B and T cells. *Cell Rep Med*. 2021;2(7):100354.
198. Zeng G, Wu Q, Pan H, Li M, Yang J, Wang L, et al. Immunogenicity and safety of a third dose of CoronaVac, and immune persistence of a two-dose schedule, in healthy adults: interim results from two single-centre, double-blind, randomised, placebo-controlled phase 2 clinical trials. *Lancet Infect Dis*. 2021.
199. Choi A, Koch M, Wu K, Chu L, Ma L, Hill A, et al. Safety and immunogenicity of SARS-CoV-2 variant mRNA vaccine boosters in healthy adults: an interim analysis. *Nat Med*. 2021.
200. Flaxman A, Marchevsky NG, Jenkin D, Aboagye J, Aley PK, Angus B, et al. Reactogenicity and immunogenicity after a late second dose or a third dose of ChAdOx1 nCoV-19 in the UK: a substudy of two randomised controlled trials (COV001 and COV002). *Lancet*. 2021;398(10304):981-90.
201. Iketani S, Liu L, Nair MS, Mohri H, Wang M, Huang Y, et al. A third COVID-19 vaccine shot markedly boosts neutralizing antibody potency and breadth *MedRxiv [Preprint]*. 2021.
202. Garcia-Beltran WF, St Denis KJ, Hoelzemer A, Lam EC, Nitido AD, Sheehan ML, et al. mRNA-based COVID-19 vaccine boosters induce neutralizing immunity against SARS-CoV-2 Omicron variant. *MedRxiv [Preprint]*. 2021.
203. Yorsaeng R, Suntronwong N, Phowatthanasathian H, Assawakosri S, Kanokudom S, Thongmee T, et al. Immunogenicity of a third dose viral-vectored COVID-19 vaccine after receiving two-dose inactivated vaccines in healthy adults. *Vaccine*. 2022;40(3):524-30.
204. Munro APS, Janani L, Cornelius V, Aley PK, Babbage G, Baxter D, et al. Safety and immunogenicity of seven COVID-19 vaccines as a third dose (booster) following two doses of ChAdOx1 nCov-19 or BNT162b2 in the UK (COV-BOOST): a blinded, multicentre, randomised, controlled, phase 2 trial. *Lancet*. 2021;398(10318):2258-76.
205. Madelon N, Heikkilä N, Sabater Royo I, Fontannaz P, Breville G, Lauper K, et al. Omicron-specific cytotoxic T-cell responses are boosted following a third dose of mRNA COVID-19 vaccine in anti-CD20-treated multiple sclerosis patients *MedRxiv [Preprint]*. 2021.

- 1
  - 2
  - 3
  - 4
  - 5
  - 6
  - 7
  - 8
  - 9
  - 10
  - 11
  - 12
  - 13
  - 14
  - 15
  - 16
  - 17
  - 18
  - 19
  - 20
  - 21
  - 22
  - 23
  - 24
  - 25
  - 26
  - 27
  - 28
  - 29
  - 30
  - 31
  - 32
  - 33
  - 34
  - 35
  - 36
  - 37
  - 38
  - 39
  - 40
  - 41
  - 42
  - 43
  - 44
  - 45
  - 46
  - 47
  - 48
  - 49
  - 50
  - 51
  - 52
  - 53
  - 54
  - 55
  - 56
  - 57
  - 58
  - 59
  - 60
206. Bar-On YM, Goldberg Y, Mandel M, Bodenheimer O, Freedman L, Kalkstein N, et al. Protection of BNT162b2 Vaccine Booster against Covid-19 in Israel. *N Engl J Med.* 2021;385(15):1393-400.
207. Barda N, Dagan N, Cohen C, Hernan MA, Lipsitch M, Kohane IS, et al. Effectiveness of a third dose of the BNT162b2 mRNA COVID-19 vaccine for preventing severe outcomes in Israel: an observational study. *Lancet.* 2021;398(10316):2093-100.
208. Arbel R, Hammerman A, Sergienko R, Friger M, Peretz A, Netzer D, et al. BNT162b2 Vaccine Booster and Mortality Due to Covid-19. *N Engl J Med.* 2021;385(26):2413-20.
209. Spitzer A, Angel Y, Marudi O, Zeltser D, Saiag E, Goldshmidt H, et al. Association of a Third Dose of BNT162b2 Vaccine With Incidence of SARS-CoV-2 Infection Among Health Care Workers in Israel. *JAMA.* 2022.
210. Bar-On YM, Goldberg Y, Mandel M, Bodenheimer O, Freedman L, Alroy-Preis S, et al. Protection against Covid-19 by BNT162b2 Booster across Age Groups. *N Engl J Med.* 2021;385(26):2421-30.
211. Levine-Tiefenbrun M, Yelin I, Alapi H, Katz R, Herzal E, Kuint J, et al. Viral loads of Delta-variant SARS-CoV-2 breakthrough infections after vaccination and booster with BNT162b2. *Nat Med.* 2021;27(12):2108-10.
212. Andrews N, Stowe J, Kirsebom F, Toffa S, Rickeard T, Gallagher E, et al. Effectiveness of COVID-19 vaccines against the Omicron (B.1.1.529) variant of concern. *medRxiv [Preprint].* 2021.
213. Hansen CH, Schelde AB, Moustsen-Helm IR, Emborg H-D, Krause TG, Mølbak K, et al. Vaccine effectiveness against SARS-CoV-2 infection with the Omicron or Delta variants following a two-dose or booster BNT162b2 or mRNA-1273 vaccination series: A Danish cohort study *MedRxiv [Preprint].* 2021.
214. Lusvarghi S, Pollett SD, Neerukonda SN, Wang W, Wang R, Vassell R, et al. SARS-CoV-2 Omicron neutralization by therapeutic antibodies, convalescent sera, and post-mRNA vaccine booster. *BioRxiv [Preprint].* 2021.
215. Cdc.gov [Internet]. CDC Recommends Pfizer Booster at 5 Months, Additional Primary Dose for Certain Immunocompromised Children. Centers for Disease Control and Prevention. [4 January 2022; cited 7 January 2022]. Available from: <https://www.cdc.gov/media/releases/2022/s0104-Pfizer-Booster.html>
216. Wu K, Choi A, Koch M, Elbashir S, Ma L, Lee D, et al. Variant SARS-CoV-2 mRNA vaccines confer broad neutralization as primary or booster series in mice. *Vaccine.* 2021;39(51):7394-400.
217. Covid19-trials.com [Internet]. Global Coronavirus COVID-19 Clinical Trial Tracker. Cytel Inc. [cited 12 January 2022]. Available from: <https://www.covid19-trials.com/>
218. Gov.uk [Internet]. First oral antiviral for COVID-19, Lagevrio (molnupiravir), approved by MHRA. Medicines and Healthcare products Regulatory Agency. [4 November 2021; cited 12 January 2022]. Available from: <https://www.gov.uk/government/news/first-oral-antiviral-for-covid-19-lagevrio-molnupiravir-approved-by-mhra>
219. Gov.uk [Internet]. Oral COVID-19 antiviral, Paxlovid, approved by UK regulator. Medicines and Healthcare products Regulatory Agency. [31 December 2021;



- 1  
2  
3 cited 12 January 2022]. Available from: <https://www.gov.uk/government/news/oral-covid-19-antiviral-paxlovid-approved-by-uk-regulator>
- 4  
5  
6 220. Fda.gov [Internet]. Coronavirus (COVID-19) Update: FDA Authorizes  
7 Additional Oral Antiviral for Treatment of COVID-19 in Certain Adults. U.S. Food and  
8 Drug Administration. [23 December 2021; cited 12 January 2022]. Available from:  
9 <https://www.fda.gov/news-events/press-announcements/coronavirus-covid-19-update-fda-authorizes-additional-oral-antiviral-treatment-covid-19-certain>
- 10  
11  
12 221. Fda.gov [Internet]. Coronavirus (COVID-19) Update: FDA Authorizes First  
13 Oral Antiviral for Treatment of COVID-19. U.S. Food and Drug Administration. [22  
14 December 2021; cited 12 January 2022]. Available from: <https://www.fda.gov/news-events/press-announcements/coronavirus-covid-19-update-fda-authorizes-first-oral-antiviral-treatment-covid-19>
- 15  
16  
17  
18 222. ema.europa.eu [Internet]. EMA issues advice on use of Lagevrio (molnupiravir)  
19 for the treatment of COVID-19. European Medicines Agency. [19 November 2021.;  
20 cited 12 January 2022]. Available from: <https://www.ema.europa.eu/en/news/ema-issues-advice-use-lagevrio-molnupiravir-treatment-covid-19>
- 21  
22  
23 223. ema.europa.eu [Internet]. EMA issues advice on use of Paxlovid (PF-07321332  
24 and ritonavir) for the treatment of COVID-19: rolling review starts in parallel. European  
25 Medicines Agency. [16 December 2021.; cited 12 January 2022]. Available from:  
26 <https://www.ema.europa.eu/en/news/ema-issues-advice-use-paxlovid-pf-07321332-ritonavir-treatment-covid-19-rolling-review-starts>
- 27  
28  
29 224. Gov.uk [Internet]. MHRA approves Xevudy (sotrovimab), a COVID-19  
30 treatment found to cut hospitalisation and death by 79%. Medicines and Healthcare  
31 products Regulatory Agency. [2 December 2021; cited 12 January 2022]. Available  
32 from: [https://www.gov.uk/government/news/mhra-approves-xevudy-sotrovimab-a-covid-19-treatment-found-to-cut-hospitalisation-and-death-by-79#:~:text=and%20licensing%20guidance-,MHRA%20approves%20Xevudy%20\(sotrovimab\)%2C%20a%20COVID%2D19%20treatment,risk%20of%20developing%20severe%20disease.](https://www.gov.uk/government/news/mhra-approves-xevudy-sotrovimab-a-covid-19-treatment-found-to-cut-hospitalisation-and-death-by-79#:~:text=and%20licensing%20guidance-,MHRA%20approves%20Xevudy%20(sotrovimab)%2C%20a%20COVID%2D19%20treatment,risk%20of%20developing%20severe%20disease.)
- 33  
34  
35  
36  
37  
38  
39 225. Fda.gov [Internet]. Coronavirus (COVID-19) Update: FDA Authorizes  
40 Additional Monoclonal Antibody for Treatment of COVID-19. U.S. Food and Drug  
41 Administration. [26 May 2021; cited 12 January 2022]. Available from:  
42 <https://www.fda.gov/news-events/press-announcements/coronavirus-covid-19-update-fda-authorizes-additional-monoclonal-antibody-treatment-covid-19>
- 43  
44  
45  
46 226. ema.europa.eu [Internet]. COVID-19: EMA recommends authorisation of  
47 antibody medicine Xevudy. European Medicines Agency. [16 December 2021.; cited  
48 12 January 2022]. Available from: [https://www.ema.europa.eu/en/news/covid-19-ema-recommends-authorisation-antibody-medicine-xevudy#:~:text=EMA's%20human%20medicines%20committee%20\(CHMP,medicine%20together%20with%20Vir%20Biotechnology.](https://www.ema.europa.eu/en/news/covid-19-ema-recommends-authorisation-antibody-medicine-xevudy#:~:text=EMA's%20human%20medicines%20committee%20(CHMP,medicine%20together%20with%20Vir%20Biotechnology.)
- 49  
50  
51  
52  
53 227. Who.int [Internet]. Therapeutics and COVID-19: living guideline. World  
54 Health Organisation. [14 January 2022; cited 21 January 2022] Available from:  
55 <https://www.who.int/publications/i/item/WHO-2019-nCoV-therapeutics-2022.1>
- 56  
57  
58 228. Nice.org.uk [Internet]. COVID-19 rapid guideline: managing COVID-19 NICE  
59 guideline [NG191]. National Institute for Health and Care Excellence. [16 December  
60

- 2021; cited 21 January 2022]. Available from: <https://www.nice.org.uk/guidance/ng191>
229. Gov.uk [Internet]. MHRA guidance on coronavirus (COVID-19). Medicines and Healthcare products Regulatory Agency. [16 September 2021; cited 21 January 2022]. Available from: <https://www.gov.uk/government/collections/mhra-guidance-on-coronavirus-covid-19>
230. [ecdc.europa.eu](https://www.ecdc.europa.eu) [Internet]. All resources on COVID-19 – Guidance and technical reports. [2022; cited 21 January 2022]. Available from: <https://www.ecdc.europa.eu/en/covid-19/all-reports-covid-19>
231. Nih.gov [Internet]. Coronavirus Disease 2019 (COVID-19) Treatment Guidelines. National Institutes of Health [19 January 2022; cited 21 January 2022]. Available from: <https://www.covid19treatmentguidelines.nih.gov/>
232. Cdc.gov [Internet]. Guidance for COVID-19. Centers for Disease Control and Prevention. [15 March 2021; cited 21 January 2022]. Available from: <https://www.cdc.gov/coronavirus/2019-ncov/communication/guidance.html>
233. Blundell R, Costa Dias M, Joyce R, Xu X. COVID-19 and Inequalities. *Fisc Stud.* 2020.
234. Chadeau-Hyam M, Bodinier B, Elliott J, Whitaker MD, Tzoulaki I, Vermeulen R, et al. Risk factors for positive and negative COVID-19 tests: a cautious and in-depth analysis of UK biobank data. *Int J Epidemiol.* 2020;49(5):1454-67.
235. Patel JA, Nielsen FBH, Badiani AA, Assi S, Unadkat VA, Patel B, et al. Poverty, inequality and COVID-19: the forgotten vulnerable. *Public Health.* 2020;183:110-1.
236. Cohen J, Rodgers YVM. Contributing factors to personal protective equipment shortages during the COVID-19 pandemic. *Prev Med.* 2020;141:106263.
237. Who.int [Internet]. Vaccine Equity. World Health Organisation. [cited 10 January 2022]. Available from: <https://www.who.int/campaigns/vaccine-equity>
238. [parliament.uk](https://www.parliament.uk) [Internet]. Coronavirus: lessons learned to date. The House of Commons, Science and Technology Committee, and Health and Social Care Committee. [12 October 2021; cited 10 January 2022]. Available from: <https://publications.parliament.uk/pa/cm5802/cmselect/cmsctech/92/9203.htm>
239. Ball P. The lightning-fast quest for COVID vaccines - and what it means for other diseases. *Nature.* 2021;589(7840):16-8.
240. Summers J, Cheng HY, Lin HH, Barnard LT, Kvalsvig A, Wilson N, et al. Potential lessons from the Taiwan and New Zealand health responses to the COVID-19 pandemic. *Lancet Reg Health West Pac.* 2020;4:100044.
241. Dagan N, Barda N, Kepten E, Miron O, Perchik S, Katz MA, et al. BNT162b2 mRNA Covid-19 Vaccine in a Nationwide Mass Vaccination Setting. *N Engl J Med.* 2021;384(15):1412-23.
242. Lopez Bernal J, Andrews N, Gower C, Gallagher E, Simmons R, Thelwall S, et al. Effectiveness of Covid-19 Vaccines against the B.1.617.2 (Delta) Variant. *N Engl J Med.* 2021;385(7):585-94.
243. Abu-Raddad LJ, Chemaitelly H, Butt AA, National Study Group for C-V. Effectiveness of the BNT162b2 Covid-19 Vaccine against the B.1.1.7 and B.1.351 Variants. *N Engl J Med.* 2021;385(2):187-9.

- 1  
2  
3  
4  
5  
6  
7  
8  
9  
10  
11  
12  
13  
14  
15  
16  
17  
18  
19  
20  
21  
22  
23  
24  
25  
26  
27  
28  
29  
30  
31  
32  
33  
34  
35  
36  
37  
38  
39  
40  
41  
42  
43  
44  
45  
46  
47  
48  
49  
50  
51  
52  
53  
54  
55  
56  
57  
58  
59  
60
244. Chung H, He S, Nasreen S, Sundaram ME, Buchan SA, Wilson SE, et al. Effectiveness of BNT162b2 and mRNA-1273 covid-19 vaccines against symptomatic SARS-CoV-2 infection and severe covid-19 outcomes in Ontario, Canada: test negative design study. *BMJ*. 2021;374:n1943.
245. Nasreen S, Chung H, He S, Brown KA, Gubbay JB, Buchan SA, et al. Effectiveness of mRNA and ChAdOx1 COVID-19 vaccines against symptomatic SARS CoV-2 infection and severe outcomes with variants of concern in Ontario. *MedRxiv [Preprint]*. 2021.
246. Puranik A, Lenehan PJ, Silvert E, Niesen MJM, Corchado-Garcia J, O'Horo JC, et al. Comparison of two highly-effective mRNA vaccines for COVID-19 during periods of Alpha and Delta variant prevalence. *MedRxiv [Preprint]*. 2021.
247. Julia Stowe, Nick Andrews, Charlotte Gower, Eileen Gallagher, Lara Utsi, Ruth Simmons, et al. Effectiveness of COVID-19 vaccines against hospital admission with the Delta (B.1.617.2) variant. *Public Health England [preprint]*. 2021.
248. Lopez Bernal J, Andrews N, Gower C, Robertson C, Stowe J, Tessier E, et al. Effectiveness of the Pfizer-BioNTech and Oxford-AstraZeneca vaccines on covid-19 related symptoms, hospital admissions, and mortality in older adults in England: test negative case-control study. *BMJ*. 2021;373:n1088.
249. Skowronski DM, Setayeshgar S, Zou M, Prystajecky N, Tyson JR, Galanis E, et al. Single-dose mRNA vaccine effectiveness against SARS-CoV-2, including Alpha and Gamma variants: a test-negative design in adults 70 years and older in British Columbia, Canada. *Clin Infect Dis*. 2021.
250. Carazo S, Talbot D, Boulianne N, Brisson M, Gilca R, Deceuninck G, et al. Single-dose mRNA vaccine effectiveness against SARS-CoV-2 in healthcare workers extending 16 weeks post-vaccination: a test-negative design from Quebec, Canada. *Clin Infect Dis*. 2021.
251. Charmet T, Schaeffer L, Grant R, Galmiche S, Cheny O, Von Platen C, et al. Impact of original, B.1.1.7, and B.1.351/P.1 SARS-CoV-2 lineages on vaccine effectiveness of two doses of COVID-19 mRNA vaccines: Results from a nationwide case-control study in France. *Lancet Reg Health Eur*. 2021;8:100171.
252. Tang P, Hasan MR, Chemaitelly H, Yassine HM, Benslimane FM, Al Khatib HA, et al. BNT162b2 and mRNA-1273 COVID-19 vaccine effectiveness against the SARS-CoV-2 Delta variant in Qatar. *Nat Med*. 2021;27(12):2136-43.
253. Hall VJ, Foulkes S, Saei A, Andrews N, Oguti B, Charlett A, et al. COVID-19 vaccine coverage in health-care workers in England and effectiveness of BNT162b2 mRNA vaccine against infection (SIREN): a prospective, multicentre, cohort study. *Lancet*. 2021;397(10286):1725-35.
254. Haas EJ, Angulo FJ, McLaughlin JM, Anis E, Singer SR, Khan F, et al. Impact and effectiveness of mRNA BNT162b2 vaccine against SARS-CoV-2 infections and COVID-19 cases, hospitalisations, and deaths following a nationwide vaccination campaign in Israel: an observational study using national surveillance data. *Lancet*. 2021;397(10287):1819-29.
255. Nanduri S, Pilishvili T, Derado G, Soe MM, Dollard P, Wu H, et al. Effectiveness of Pfizer-BioNTech and Moderna Vaccines in Preventing SARS-CoV-2 Infection Among Nursing Home Residents Before and During Widespread Circulation

- of the SARS-CoV-2 B.1.617.2 (Delta) Variant - National Healthcare Safety Network, March 1-August 1, 2021. *MMWR Morb Mortal Wkly Rep.* 2021;70(34):1163-6.
256. Fowlkes A, Gaglani M, Groover K, Thiese MS, Tyner H, Ellingson K, et al. Effectiveness of COVID-19 Vaccines in Preventing SARS-CoV-2 Infection Among Frontline Workers Before and During B.1.617.2 (Delta) Variant Predominance - Eight U.S. Locations, December 2020-August 2021. *MMWR Morb Mortal Wkly Rep.* 2021;70(34):1167-9.
257. Lefevre B, Tondeur L, Madec Y, Grant R, Lina B, van der Werf S, et al. Beta SARS-CoV-2 variant and BNT162b2 vaccine effectiveness in long-term care facilities in France. *Lancet Healthy Longev.* 2021.
258. Pouwels KB, Pritchard E, Matthews PC, Stoesser N, Eyre DW, Vihta K-D, et al. Effect of Delta variant on viral burden and vaccine effectiveness against new SARS-CoV-2 infections in the UK. *Nature Medicine.* 2021.
259. Williams C, Al-Bargash D, Macalintal C, Stuart R, Seth A, Latham J, et al. COVID-19 Outbreak Associated with a SARS-CoV-2 P.1 Lineage in a Long-Term Care Home after Implementation of a Vaccination Program - Ontario, April-May 2021. *Clin Infect Dis.* 2021.
260. Fabiani M, Ramigni M, Gobetto V, Mateo-Urdiales A, Pezzotti P, Piovesan C. Effectiveness of the Comirnaty (BNT162b2, BioNTech/Pfizer) vaccine in preventing SARS-CoV-2 infection among healthcare workers, Treviso province, Veneto region, Italy, 27 December 2020 to 24 March 2021. *Euro Surveill.* 2021;26(17).
261. Thomas SJ, Moreira ED, Jr., Kitchin N, Absalon J, Gurtman A, Lockhart S, et al. Safety and Efficacy of the BNT162b2 mRNA Covid-19 Vaccine through 6 Months. *N Engl J Med.* 2021;385(19):1761-73.
262. Angel Y, Spitzer A, Henig O, Saiag E, Sprecher E, Padova H, et al. Association Between Vaccination With BNT162b2 and Incidence of Symptomatic and Asymptomatic SARS-CoV-2 Infections Among Health Care Workers. *JAMA.* 2021;325(24):2457-65.
263. Bjork J, Inghammar M, Moghaddassi M, Rasmussen M, Malmqvist U, Kahn F. High level of protection against COVID-19 after two doses of BNT162b2 vaccine in the working age population - first results from a cohort study in Southern Sweden. *Infect Dis (Lond).* 2022;54(2):128-33.
264. Cabezas C, Coma E, Mora-Fernandez N, Li X, Martinez-Marcos M, Fina F, et al. Associations of BNT162b2 vaccination with SARS-CoV-2 infection and hospital admission and death with covid-19 in nursing homes and healthcare workers in Catalonia: prospective cohort study. *BMJ.* 2021;374:n1868.
265. Emborg H-D, Valentiner-Branth P, Schelde AB, Nielsen KF, Gram MA, Moustsen-Helms IR, et al. Vaccine effectiveness of the BNT162b2 mRNA COVID-19 vaccine against RT-PCR confirmed SARS-CoV2 infections, hospitalisations and mortality in prioritised risk groups. *MedRxiv [Preprint].* 2021.
266. Gras-Valenti P, Chico-Sanchez P, Algado-Selles N, Jimenez-Sepulveda NJ, Gomez-Sotero IL, Fuster-Perez M, et al. [Effectiveness of the first dose of BNT162b2 vaccine to preventing covid-19 in healthcare personnel.]. *Rev Esp Salud Publica.* 2021;95.
267. Mason TFD, Whitston M, Hodgson J, Watkinson RE, Lau YS, Abdulrazeg O, et al. Effects of BNT162b2 mRNA vaccine on COVID-19 infection and hospitalisation

- 1  
2  
3 amongst older people: matched case control study for England. *BMC Med.*  
4 2021;19(1):275.  
5  
6 268. Monge S, Olmedo C, Alejos B, Lapena MF, Sierra MJ, Limia A, et al. Direct  
7 and Indirect Effectiveness of mRNA Vaccination against Severe Acute Respiratory  
8 Syndrome Coronavirus 2 in Long-Term Care Facilities, Spain. *Emerg Infect Dis.*  
9 2021;27(10):2595-603.  
10  
11 269. Pritchard E, Matthews PC, Stoesser N, Eyre DW, Gethings O, Vihta KD, et al.  
12 Impact of vaccination on new SARS-CoV-2 infections in the United Kingdom. *Nat*  
13 *Med.* 2021;27(8):1370-8.  
14  
15 270. Regev-Yochay G, Amit S, Bergwerk M, Lipsitch M, Leshem E, Kahn R, et al.  
16 Decreased infectivity following BNT162b2 vaccination: A prospective cohort study in  
17 Israel. *Lancet Reg Health Eur.* 2021;7:100150.  
18  
19 271. Shrotri M, Krutikov M, Palmer T, Giddings R, Azmi B, Subbarao S, et al.  
20 Vaccine effectiveness of the first dose of ChAdOx1 nCoV-19 and BNT162b2 against  
21 SARS-CoV-2 infection in residents of long-term care facilities in England (VIVALDI):  
22 a prospective cohort study. *Lancet Infect Dis.* 2021;21(11):1529-38.  
23  
24 272. Swift MD, Breeher LE, Tande AJ, Tommaso CP, Hainy CM, Chu H, et al.  
25 Effectiveness of Messenger RNA Coronavirus Disease 2019 (COVID-19) Vaccines  
26 Against Severe Acute Respiratory Syndrome Coronavirus 2 (SARS-CoV-2) Infection  
27 in a Cohort of Healthcare Personnel. *Clin Infect Dis.* 2021;73(6):e1376-e9.  
28  
29 273. Thompson MG, Burgess JL, Naleway AL, Tyner H, Yoon SK, Meece J, et al.  
30 Prevention and Attenuation of Covid-19 with the BNT162b2 and mRNA-1273  
31 Vaccines. *N Engl J Med.* 2021;385(4):320-9.  
32  
33 274. Frencck RW, Jr., Klein NP, Kitchin N, Gurtman A, Absalon J, Lockhart S, et al.  
34 Safety, Immunogenicity, and Efficacy of the BNT162b2 Covid-19 Vaccine in  
35 Adolescents. *N Engl J Med.* 2021;385(3):239-50.  
36  
37 275. June Choe Y, Yi S, Hwang I, Kim J, Park YJ, Cho E, et al. Safety and  
38 effectiveness of BNT162b2 mRNA Covid-19 vaccine in adolescents. *Vaccine.* 2021.  
39  
40 276. Lutrick K, Rivers P, Yoo YM, Grant L, Hollister J, Jovel K, et al. Interim  
41 Estimate of Vaccine Effectiveness of BNT162b2 (Pfizer-BioNTech) Vaccine in  
42 Preventing SARS-CoV-2 Infection Among Adolescents Aged 12-17 Years - Arizona,  
43 July-December 2021. *MMWR Morb Mortal Wkly Rep.* 2021;70(5152):1761-5.  
44  
45 277. Glatman-Freedman A, Bromberg M, Dichtiar R, Hershkovitz Y, Keinan-Boker  
46 L. The BNT162b2 vaccine effectiveness against new COVID-19 cases and  
47 complications of breakthrough cases: A nation-wide retrospective longitudinal multiple  
48 cohort analysis using individualised data. *EBioMedicine.* 2021;72:103574.  
49  
50 278. Pilishvili T, Fleming-Dutra KE, Farrar JL, Gierke R, Mohr NM, Talan DA, et  
51 al. Interim Estimates of Vaccine Effectiveness of Pfizer-BioNTech and Moderna  
52 COVID-19 Vaccines Among Health Care Personnel - 33 U.S. Sites, January-March  
53 2021. *MMWR Morb Mortal Wkly Rep.* 2021;70(20):753-8.  
54  
55 279. Martinez-Baz I, Miqueleiz A, Casado I, Navascues A, Trobajo-Sanmartin C,  
56 Burgui C, et al. Effectiveness of COVID-19 vaccines in preventing SARS-CoV-2  
57 infection and hospitalisation, Navarre, Spain, January to April 2021. *Euro Surveill.*  
58 2021;26(21).  
59  
60 280. Vasileiou E, Simpson CR, Shi T, Kerr S, Agrawal U, Akbari A, et al. Interim  
findings from first-dose mass COVID-19 vaccination roll-out and COVID-19 hospital

- admissions in Scotland: a national prospective cohort study. *Lancet*. 2021;397(10285):1646-57.
281. [ecdc.europa.eu](https://www.ecdc.europa.eu) [Internet]. Interim analysis of COVID-19 vaccine effectiveness against Severe Acute Respiratory Infection due to laboratory-confirmed SARS-CoV-2 among individuals aged 50 years and older, ECDC multi-country study – first update. European Centre for Disease Prevention and Control. [20 January 2022; cited 24 January 2022]. Available from: <https://www.ecdc.europa.eu/en/publications-data/interim-analysis-covid-19-vaccine-effectiveness-against-severe-acute-respiratory>
282. Rosenberg ES, Dorabawila V, Easton D, Bauer UE, Kumar J, Hoen R, et al. Covid-19 Vaccine Effectiveness in New York State. *N Engl J Med*. 2022;386(2):116-27.
283. Olson SM, Newhams MM, Halasa NB, Price AM, Boom JA, Sahni LC, et al. Effectiveness of BNT162b2 Vaccine against Critical Covid-19 in Adolescents. *N Engl J Med*. 2022.
284. Zambrano LD, Newhams MM, Olson SM, Halasa NB, Price AM, Boom JA, et al. Effectiveness of BNT162b2 (Pfizer-BioNTech) mRNA Vaccination Against Multisystem Inflammatory Syndrome in Children Among Persons Aged 12-18 Years - United States, July-December 2021. *MMWR Morb Mortal Wkly Rep*. 2022;71(2):52-8.
285. Emary KRW, Golubchik T, Aley PK, Ariani CV, Angus B, Bibi S, et al. Efficacy of ChAdOx1 nCoV-19 (AZD1222) vaccine against SARS-CoV-2 variant of concern 202012/01 (B.1.1.7): an exploratory analysis of a randomised controlled trial. *Lancet*. 2021;397(10282):1351-62.
286. [astrazeneca.com](https://www.astrazeneca.com) [Internet]. AZD1222 US Phase III trial met primary efficacy endpoint in preventing COVID-19 at interim analysis. AstraZeneca. [22 March 2021; cited 15 October 2021]. Available from: <https://www.astrazeneca.com/media-centre/press-releases/2021/astrazeneca-us-vaccine-trial-met-primary-endpoint.html>
287. Voysey M, Clemens SAC, Madhi SA, Weckx LY, Folegatti PM, Aley PK, et al. Safety and efficacy of the ChAdOx1 nCoV-19 vaccine (AZD1222) against SARS-CoV-2: an interim analysis of four randomised controlled trials in Brazil, South Africa, and the UK. *Lancet*. 2021;397(10269):99-111.
288. Madhi SA, Baillie V, Cutland CL, Voysey M, Koen AL, Fairlie L, et al. Efficacy of the ChAdOx1 nCoV-19 Covid-19 Vaccine against the B.1.351 Variant. *N Engl J Med*. 2021;384(20):1885-98.
289. Pramod S, Govindan D, Ramasubramani P, Kar SS, Aggarwal R, Manoharan N, et al. Effectiveness of Covishield vaccine in preventing Covid-19 – A test-negative case control study. *MedRxiv* [Preprint]. 2021.
290. Falsey AR, Sobieszczyk ME, Hirsch I, Sproule S, Robb ML, Corey L, et al. Phase 3 Safety and Efficacy of AZD1222 (ChAdOx1 nCoV-19) Covid-19 Vaccine. *N Engl J Med*. 2021;385(25):2348-60.
291. Clemens SAC, Folegatti PM, Emary KRW, Weckx LY, Ratcliff J, Bibi S, et al. Efficacy of ChAdOx1 nCoV-19 (AZD1222) vaccine against SARS-CoV-2 lineages circulating in Brazil. *Nat Commun*. 2021;12(1):5861.
292. Voysey M, Costa Clemens SA, Madhi SA, Weckx LY, Folegatti PM, Aley PK, et al. Single-dose administration and the influence of the timing of the booster dose on

- immunogenicity and efficacy of ChAdOx1 nCoV-19 (AZD1222) vaccine: a pooled analysis of four randomised trials. *Lancet*. 2021;397(10277):881-91.
293. Bhattacharya A, Ranjan P, Ghosh T, Agarwal H, Seth S, Maher GT, et al. Evaluation of the dose-effect association between the number of doses and duration since the last dose of COVID-19 vaccine, and its efficacy in preventing the disease and reducing disease severity: A single centre, cross-sectional analytical study from India. *Diabetes Metab Syndr*. 2021;15(5):102238.
294. Malathi Murugesan, Prasad Mathews, Hema Paul, Rajiv Karthik, Joy John Mammen, Rupali. P. Protective Effect Conferred by Prior Infection and Vaccination on COVID-19 in a Healthcare Worker Cohort in South India. SSRN [Preprint]. 2021.
295. Alencar CH, Cavalcanti LPG, Almeida MM, Barbosa PPL, Cavalcante KKS, Melo DN, et al. High Effectiveness of SARS-CoV-2 Vaccines in Reducing COVID-19-Related Deaths in over 75-Year-Olds, Ceara State, Brazil. *Trop Med Infect Dis*. 2021;6(3).
296. Cerqueira-Silva T, Oliveira Vda, Pescarini J, Bertoldo Júnior J, Machado TM, Flores-Ortiz R, et al. The effectiveness of Vaxzevria and CoronaVac vaccines: A nationwide longitudinal retrospective study of 61 million Brazilians (VigiVac-COVID19). . MedRxiv [Preprint]. 2021.
297. Otavio T Ranzani, Rogério dos Santos Leite, Larissa Domingues Castilho, Crhistinne Cavalheiro Maymone Gonçalves, Geraldo Resende, Rosana Leite de Melo, et al. Vaccine effectiveness of Ad26.COV2.S against symptomatic COVID-19 and clinical outcomes in Brazil: a test-negative study design. MedRxiv [Preprint]. 2021.
298. Corchado-Garcia J, Puyraimond-Zemmour D, Hughes T, Cristea-Platon T, Lenehan P, Pawlowski C, et al. Real-world effectiveness of Ad26.COV2.S adenoviral vector vaccine for COVID-19. MedRxiv [Preprint]. 2021.
299. Barlow RS, Jian K, Larson L. Effectiveness of COVID-19 Vaccines Against SARS-CoV-2 Infection During a Delta Variant Epidemic Surge in Multnomah County, Oregon, July 2021. MedRxiv [Preprint]. 2021.
300. Polinski JM, Weckstein AR, Batech M, Kabelac C, Kamath T, Harvey R, et al. Effectiveness of the Single-Dose Ad26.COV2.S COVID Vaccine. MedRxiv [Preprint]. 2021.
301. Corchado-Garcia J, Zemmour D, Hughes T, Bandi H, Cristea-Platon T, Lenehan P, et al. Analysis of the Effectiveness of the Ad26.COV2.S Adenoviral Vector Vaccine for Preventing COVID-19. *JAMA Netw Open*. 2021;4(11):e2132540.
302. Chin ET, Leidner D, Zhang Y, Long E, Prince L, Li Y, et al. Effectiveness of the mRNA-1273 Vaccine during a SARS-CoV-2 Delta Outbreak in a Prison. *N Engl J Med*. 2021;385(24):2300-1.
303. Gupta K, O'Brien WJ, Bellino P, Linsenmeyer K, Doshi SJ, Sprague RS, et al. Incidence of SARS-CoV-2 Infection in Health Care Workers After a Single Dose of mRNA-1273 Vaccine. *JAMA Netw Open*. 2021;4(6):e2116416.
304. Chemaitelly H, Yassine HM, Benslimane FM, Al Khatib HA, Tang P, Hasan MR, et al. mRNA-1273 COVID-19 vaccine effectiveness against the B.1.1.7 and B.1.351 variants and severe COVID-19 disease in Qatar. *Nat Med*. 2021;27(9):1614-21.

- 1
  - 2
  - 3
  - 4
  - 5
  - 6
  - 7
  - 8
  - 9
  - 10
  - 11
  - 12
  - 13
  - 14
  - 15
  - 16
  - 17
  - 18
  - 19
  - 20
  - 21
  - 22
  - 23
  - 24
  - 25
  - 26
  - 27
  - 28
  - 29
  - 30
  - 31
  - 32
  - 33
  - 34
  - 35
  - 36
  - 37
  - 38
  - 39
  - 40
  - 41
  - 42
  - 43
  - 44
  - 45
  - 46
  - 47
  - 48
  - 49
  - 50
  - 51
  - 52
  - 53
  - 54
  - 55
  - 56
  - 57
  - 58
  - 59
  - 60
305. Herlihy R, Bamberg W, Burakoff A, Alden N, Severson R, Bush E, et al. Rapid Increase in Circulation of the SARS-CoV-2 B.1.617.2 (Delta) Variant - Mesa County, Colorado, April-June 2021. *MMWR Morb Mortal Wkly Rep.* 2021;70(32):1084-7.
306. Bruxvoort KJ, Sy LS, Qian L, Ackerson BK, Luo Y, Lee GS, et al. Real-world effectiveness of the mRNA-1273 vaccine against COVID-19: Interim results from a prospective observational cohort study. *Lancet Reg Health Am.* 2021:100134.
307. Bruxvoort KJ, Sy LS, Qian L, Ackerson BK, Luo Y, Lee GS, et al. Effectiveness of mRNA-1273 against delta, mu, and other emerging variants of SARS-CoV-2: test negative case-control study. *BMJ.* 2021;375:e068848.
308. El Sahly HM, Baden LR, Essink B, Doblecki-Lewis S, Martin JM, Anderson EJ, et al. Efficacy of the mRNA-1273 SARS-CoV-2 Vaccine at Completion of Blinded Phase. *N Engl J Med.* 2021;385(19):1774-85.
309. Li XN, Huang Y, Wang W, Jing QL, Zhang CH, Qin PZ, et al. Effectiveness of inactivated SARS-CoV-2 vaccines against the Delta variant infection in Guangzhou: a test-negative case-control real-world study. *Emerg Microbes Infect.* 2021;10(1):1751-9.
310. Min Kang, Yao Yi, Yan Li, Limei Sun, Aiping Deng, Ting Hu, et al. Effectiveness of Inactivated COVID-19 Vaccines Against COVID-19 Pneumonia and Severe Illness Caused by the B.1.617.2 (Delta) Variant: Evidence from an Outbreak in Guangdong, China. *SSRN [Preprint].* 2021.
311. Silva-Valencia Javier, Soto-Becerra Percy, Escobar-Agreda Stefan, Fernández-Navarro Manuel, Moscoso-Porras Miguel, Solari Lely, et al. Effectiveness of the BBIPB-CorV Vaccine in Preventing Infection and Death in Health Care Workers in Peru 2021. *SSRN [Preprint].* 2021.
312. Al Kaabi N, Zhang Y, Xia S, Yang Y, Al Qahtani MM, Abdulrazzaq N, et al. Effect of 2 Inactivated SARS-CoV-2 Vaccines on Symptomatic COVID-19 Infection in Adults: A Randomized Clinical Trial. *JAMA.* 2021;326(1):35-45.
313. Farida Ismail AlHosani, Anderson Eduardo Stanciole, Bashir Aden, Andrey Timoshkin, Omar Najim, Walid Abbas Zaher, et al. Sinopharm's BBIBP-CorV vaccine effectiveness on preventing hospital admission and deaths: results from a retrospective study in the Emirate of Abu Dhabi, United Arab Emirates (UAE). *SSRN [Preprint].* 2021.
314. AlQahtani M, Bhattacharyya S, Alawadi A, Mahmeed HA, Sayed JA, Justman J, et al. Morbidity and mortality from COVID-19 postvaccination breakthrough infections in association with vaccines and the emergence of variants in Bahrain. *Research Square [Preprint].* 2021.
315. Jara A, Undurraga EA, Gonzalez C, Paredes F, Fontecilla T, Jara G, et al. Effectiveness of an Inactivated SARS-CoV-2 Vaccine in Chile. *N Engl J Med.* 2021;385(10):875-84.
316. Ranzani OT, Hitchings MDT, Dorion M, D'Agostini TL, de Paula RC, de Paula OFP, et al. Effectiveness of the CoronaVac vaccine in older adults during a gamma variant associated epidemic of covid-19 in Brazil: test negative case-control study. *BMJ.* 2021;374:n2015.
317. Hitchings MDT, Ranzani OT, Torres MSS, de Oliveira SB, Almiron M, Said R, et al. Effectiveness of CoronaVac among healthcare workers in the setting of high



- 1  
2  
3 SARS-CoV-2 Gamma variant transmission in Manaus, Brazil: A test-negative case-  
4 control study. *Lancet Reg Health Am.* 2021;1:100025.  
5  
6 318. Enny S. Paixao, Kerry LM Wong, Flavia Jôse Oliveira Alves, Vinicius de  
7 Araújo Oliveira, Thiago Cerqueira-Silva, Juracy Bertoldo Júnior, et al. Effectiveness of  
8 the CoronaVac vaccine in prevention of symptomatic and progression to severe Covid-  
9 19 in pregnant women in Brazil. SSRN [Preprint]. 2021.  
10  
11 319. Hitchings MDT, Ranzani OT, Scaramuzzini Torres MS, de Oliveira SB,  
12 Almiron M, Said R, et al. Effectiveness of CoronaVac in the setting of high SARS-  
13 CoV-2 P.1 variant transmission in Brazil: A test-negative case-control study. *MedRxiv*  
14 [Preprint]. 2021.  
15  
16 320. Tanriover MD, Doganay HL, Akova M, Guner HR, Azap A, Akhan S, et al.  
17 Efficacy and safety of an inactivated whole-virion SARS-CoV-2 vaccine (CoronaVac):  
18 interim results of a double-blind, randomised, placebo-controlled, phase 3 trial in  
19 Turkey. *Lancet.* 2021;398(10296):213-22.  
20  
21 321. Palacios R, Batista AP, Albuquerque CSN, Patiño EG, Santos JdP, Tilli Reis  
22 Pessoa Conde M, et al. Efficacy and Safety of a COVID-19 Inactivated Vaccine in  
23 Healthcare Professionals in Brazil: The PROFISCOV Study. SSRN [Preprint]. 2021.  
24  
25 322. Ella R, Reddy S, Blackwelder W, Potdar V, Yadav P, Sarangi V, et al. Efficacy,  
26 safety, and lot-to-lot immunogenicity of an inactivated SARS-CoV-2 vaccine  
27 (BBV152): interim results of a randomised, double-blind, controlled, phase 3 trial.  
28 *Lancet.* 2021;398(10317):2173-84.  
29  
30 323. Desai D, Khan AR, Soneja M, Mittal A, Naik S, Kodan P, et al. Effectiveness  
31 of an inactivated virus-based SARS-CoV-2 vaccine, BBV152, in India: a test-negative,  
32 case-control study. *Lancet Infect Dis.* 2021.  
33  
34 324. Malhotra S, Mani K, Lodha R, Bakhshi S, Mathur VP, Gupta P, et al. SARS-  
35 CoV-2 Reinfection Rate and Estimated Effectiveness of the Inactivated Whole Virion  
36 Vaccine BBV152 Against Reinfection Among Health Care Workers in New Delhi,  
37 India. *JAMA Netw Open.* 2022;5(1):e2142210.  
38  
39 325. Heath PT, Galiza EP, Baxter DN, Boffito M, Browne D, Burns F, et al. Safety  
40 and Efficacy of NVX-CoV2373 Covid-19 Vaccine. *N Engl J Med.* 2021;385(13):1172-  
41 83.  
42  
43 326. Dunkle LM, Kotloff KL, Gay CL, Anez G, Adelglass JM, Barrat Hernandez  
44 AQ, et al. Efficacy and Safety of NVX-CoV2373 in Adults in the United States and  
45 Mexico. *N Engl J Med.* 2021.  
46  
47 327. Toback S, Galiza E, Cosgrove C, Galloway J, Goodman AL, Swift PA, et al.  
48 Safety, immunogenicity, and efficacy of a COVID-19 vaccine (NVX-CoV2373) co-  
49 administered with seasonal influenza vaccines: an exploratory substudy of a  
50 randomised, observer-blinded, placebo-controlled, phase 3 trial. *Lancet Respir Med.*  
51 2021.  
52  
53 328. Shinde V, Bhikha S, Hoosain Z, Archary M, Bhorat Q, Fairlie L, et al. Efficacy  
54 of NVX-CoV2373 Covid-19 Vaccine against the B.1.351 Variant. *N Engl J Med.*  
55 2021;384(20):1899-909.  
56  
57  
58  
59  
60

## Response to Reviewers - COVID-19: Virology, variants, and vaccines

We would like to thank the editor and reviewers for their insightful and useful comments on our review. We have addressed the comments within the article and outlined the changes we have made below. We believe these alterations and changes have significantly improved the review as a result. The reviewer's comments are preceded by "**Comment**" and our response is preceded by "**Response**". Where possible, we have included the in-text amendments after each response in italics. Any changes or additions to the text are also highlighted in the manuscript.

### Editors' comments:

#### Comment

1. Please provide a **document labelled 'response to reviewers'** which gives a point-by-point response to both the referees comments and those of the editors.

#### Response

*Thank you. This document provides a point-by-point response of both the editors and reviewers comments.*

#### Comment

2. Abstract: as the review is not a systematic review and therefore not classed as original Research, please remove the structured headings. The abstract should just summarise what the review is about in 2-300 words (ie the same as your BMJ review).

#### Response

*Thank you for the suggestion. We have updated the abstract and removed the structured headings. It now reads as following:*

#### ***"Abstract***

*As of 25th January 2022, there have been over 349 million confirmed cases of COVID-19, with over 5.59 million confirmed deaths associated with the SARS-CoV-2 virus. The COVID-19 pandemic has prompted an extensive, global effort to study the molecular evolution of the virus and develop vaccines to combat its spread. Although rigorous determination of SARS-CoV-2 infectivity remains elusive, due to the continuous evolution of the virus, steps have been made to understand its genome, structure, and emerging genetic mutations. The SARS-CoV-2 genome is composed of a number of open reading frames (ORFs) and structural proteins, including the spike protein, which is essential for entry into host cells. As of the 25th January 2022, the WHO reports five variants of concern (VOC) two variants of interest (VOI) and three variants under monitoring (VUM). The mutations harboured in these variants confer an increased transmissibility, severity of disease, and escape from neutralising antibodies compared to the primary strain. The current vaccine strategy, including booster doses, provides protection from severe disease. As of 24th January 2022, there are 33 approved vaccines in use in 197 countries. In this review, we discuss the genetics, structure and transmission methods of SARS-CoV-2 and its variants, highlighting how mutations provide enhanced abilities to spread and inflict disease. We also outline the vaccines currently in use around the world, providing evidence for the immunogenicity and effectiveness of each."*

#### Comment

3. Methods: please include the dates you searched from and to. Due to the additions requested below the end search date will be more current. Please provide more detail about the exclusion criteria (study design etc).

#### Response

<https://mc.manuscriptcentral.com/bmjmedicine>

*We have updated the dates we searched to and from.*

*Due to the restrictions on the word count, we have provided some more information on selection criteria within the methods section, however, we have also provided a supplementary file describing the specific search terms and the inclusion/exclusion criteria that we used.*

*The methods section now reads as:*

*“We searched PubMed and Embase databases for COVID-19-related articles published between 1st January 2020 and 25th January 2022 and for general coronavirus-related articles published from 1st January 2000 onwards. Our search terms included SARS-CoV-2, COVID-19, and specific terms including virology, genome, variants, and vaccine. Additional, specific search terms are outlined in supplementary file 1. We performed further manual searching for additional articles and data using relevant databases, including who.int, gov.uk, and ecdc.europa.eu/en. Due to the rapidly evolving nature of the literature involving SARS-CoV-2, we also searched preprint databases including MedRxiv and BioRxiv. Due to the various topics addressed here, studies were selected through different criteria, details of which can be found in supplementary file 1. Overall, studies were selected based on quality and journal reputation, with real-world studies with large sample sizes of greatest interest.”*

## Comment

4. **OMICRON:** Please can you include in relevant sections throughout the review what is known about the new OMICRON variant, and any other variants of interest.

## Response

*We have included a section dedicated to the Omicron variant in the variants of concern section, while relevant omicron studies have been included and discussed elsewhere, e.g. in the waning immunity and boosters section.*

*This section now reads as:*

### *“5.1.5 Omicron*

*The Omicron variant is of the B.1.1.529 lineage and was first discovered in November 2021 in South Africa and Botswana before being detected in multiple countries and classified as a VOC on 26th November 2021(3). This variant contains over 30 S protein mutations(100), 23 of which have been previously identified, including K417N, T478K, E484A, D614G, H655Y, P681H, and N501Y(131). 15 Omicron mutations are contained within the RBD(17) providing the variant with a significantly enhanced binding affinity to the ACE2 receptor(131, 132). In addition, various single mutations harboured with the RBD of the Omicron variant impair the effectiveness of neutralising antibodies, including K417N, N440K, G446S, E484A, Q493K, G496S, G339D, S371L, and S375F(17).*

*The emergence of Omicron has been followed by a tidal wave of infections worldwide. Early data from South Africa demonstrated that the proportion of COVID-19 cases caused by the Omicron variant rose from 3% in early October, to 98% by early December(133). In late December 2021, meanwhile, the doubling time for number of positive Omicron cases was between two and three in the UK, US, and much of Europe(134, 135), highlighting the transmissibility of this variant. The mutations harboured by Omicron that enhance its binding affinity(131, 132) and ability to escape neutralising antibodies(17) likely drove its rapid spread, as did its fast replication rate, which is around 70 times faster than the Delta and wild-type strains(136). The reinfection rate of Omicron has also been found to be significantly higher than that of previous variants in studies from Scotland(137) and South Africa(138).*

*The Omicron variant has extensive but incomplete escape from naturally acquired and vaccine-induced immunity(139, 140). Compared to the Delta variant, Omicron requires around a ten-fold*

1 increased antibody titre to be neutralised, following vaccination with either Oxford-AstraZeneca or  
 2 Pfizer/BioNtech vaccines(141). Indeed, blood sera from individuals who had received two doses of the  
 3 Pfizer/BioNtech vaccine exhibited more than a 25-fold reduction in neutralising antibody titres  
 4 against the Omicron variant compared to the wild-type strain(142). T-cell responses to Omicron may  
 5 remain intact, however. One preprint study demonstrated that 70-80% of the T-cell response  
 6 targeting the S protein was maintained in those vaccinated or with prior infection, while the  
 7 magnitude of Omicron cross-reactive T-cells was similar to that of both Delta and Beta variants(143).  
 8 Furthermore, data from Pfizer/BioNtech revealed that 80% of the epitopes in the Omicron variant S  
 9 protein that are recognised by CD8+ T-cells were not affected by this variant's mutations, following  
 10 two-doses of the vaccine(142). T-cell responses induced from vaccine administration or prior infection  
 11 may, therefore, provide some protection from severe disease.  
 12  
 13

14 *Recent real-world evidence has implied that Omicron infection is milder in severity than*  
 15 *previous variants. In an early South African analysis, the risk of hospitalisation (aOR=0.2) was lower*  
 16 *for Omicron infections compared to non-Omicron SARS-CoV-2 infections(133) while, compared to*  
 17 *earlier infections associated with the Delta variant, Omicron-infected individuals had a lower risk of*  
 18 *severe disease (aOR=0.3)(133). In December 2021 in England, Omicron cases were found to induce a*  
 19 *significantly reduced risk of hospitalisation or presentation for emergency care in comparison to*  
 20 *Delta cases(144, 145). The decreased disease severity inflicted by Omicron may be due to its reduced*  
 21 *capacity for replication in lung tissue, which was found to be more than ten times less in lung tissue*  
 22 *compared to Delta(136). Concordantly, the S protein of the Omicron variant is less efficient at*  
 23 *cleaving the ACE2 receptor and entering cells of lung organoids(141), while is also less able to cause*  
 24 *fusion between lung cells compared to Delta(141), which is often observed in cases of severe COVID-*  
 25 *19. The reduction in replication within the lungs, and the preservation of T-cell responses likely*  
 26 *contribute to the milder disease exerted by the Omicron variant.*  
 27  
 28  
 29

30 *Although the Omicron variant appears to manifest in mild disease, high case numbers may*  
 31 *still result in a large number of hospitalisations and deaths in those vulnerable to the virus. Omicron*  
 32 *case numbers may be beginning to peak, however. In South Africa, a 29.7% decrease in weekly*  
 33 *COVID-19 cases were reported in the week ending 25th December 2021, compared to the previous*  
 34 *week, and the Omicron wave is said to have passed(146). Concerningly, global case numbers*  
 35 *continue to rise rapidly(147) and many countries will continue to feel the pressure exerted by the*  
 36 *wave of Omicron infections.”*  
 37  
 38  
 39

#### 40 **Comment**

- 41  
 42 5. Vaccination/Waning immunity sections: please update these sections to include any new data on  
 43 efficacy, and the recent data on the efficacy of the different booster jabs.  
 44

#### 45 **Response**

46  
 47 *We have updated these sections with new data. Table 2 has also been updated to include*  
 48 *new data on vaccine effectiveness.*  
 49

50  
 51 *The waning immunity and boosters section now reads as:*

52 *“6.11 Waning immunity and boosters*

53 *Throughout the COVID-19 pandemic, emerging variants have threatened the effectiveness of*  
 54 *vaccines (table 2). Simultaneously, waning immunity following vaccination questions how long*  
 55 *vaccines remain effective, and highlights the importance of booster doses. Indeed, protection against*  
 56 *SARS-CoV-2 following vaccination decreases over time, both in terms of antibody titres(188-190) and*  
 57 *vaccine effectiveness(191-194). Cellular responses, such as T-cell immunity, may persist for longer*  
 58 *periods, however(195, 196). With a gradual loss of protection from SARS-CoV-2 following COVID-19*  
 59 *vaccination, many countries are now rolling out booster programmes with the aim of raising levels of*  
 60 *immunity.*

1 Since booster programmes began, evidence that a booster vaccine dose enhances antibody  
2 and cellular responses has accumulated. Following a third dose of vaccine, neutralising antibody  
3 titres increase significantly(197-200) and, in some cases, to higher levels than after the primary two  
4 doses(197). Additionally, boosters have also been found to increase neutralising antibody titres  
5 against Beta, Gamma, Delta, and Omicron variants(198, 201, 202). T-cell response is also enhanced  
6 following a third dose(199, 203, 204). Together, enhancing neutralising antibody and cellular  
7 responses with a booster vaccine dose is likely to provide a greater level of protection than relying on  
8 immunity built through a primary regimen.  
9

10 The antibody and cellular responses observed following booster vaccinations have been  
11 found to correlate with increased levels of protection against SAR-CoV-2 infection and severe illness.  
12 On 30th July 2021, Israel was the first country to offer a third dose of BNT162b2 to certain groups.  
13 Subsequently, several studies have revealed that those who received a third vaccine dose were  
14 significantly less likely to be infected or have severe disease with SARS-CoV-2 compared to those who  
15 received two-doses(205-208). In those aged 60 or older, an observational study demonstrated that  
16 the rate of severe COVID-19 and death was lower in the boosted group by a factor of 17.9 and 14.7,  
17 respectively, compared to the non-boosted group(209). Booster doses of COVID-19 vaccine have been  
18 shown to be effective against infection with Delta(210, 211) and, to a lesser degree, Omicron  
19 variants(141, 142, 145, 211-213) despite the numerous mutations harboured by these variants.  
20 Overall, increasing evidence is pointing towards the benefits of booster doses of COVID-19 vaccines,  
21 therefore it is expected that booster programmes will continue to roll out across the globe. Based on  
22 current evidence, the CDC recommend that the time interval for receiving a booster following the  
23 primary regimen is five months for Pfizer/BioNTech BNT162b2 primary regimen, six months for  
24 Moderna mRNA-1273 primary regimen, and two months for Johnson & Johnson Ad26.COVS primary  
25 regimen(214). As the pandemic progresses and new variants emerge, variant-specific  
26 vaccines may require development, with pre-clinical studies demonstrating their efficacy(215) and  
27 pharmaceutical companies, such as Pfizer, advancing in variant-specific vaccine development(142).  
28 Policy makers should also consider when vaccine boosters will be given in the future and who will  
29 receive booster doses in the long-term.”  
30  
31  
32  
33  
34

#### 35 Comment

36 6. Tables: please update the tables to include any new data.  
37

#### 38 Response

39 Thank you, the following sentences outline the updates that have been made to each table.  
40

41 Table 1 has been updated to include the current VOC/VUI/VUM, as listed by WHO.  
42

43 Table 2 has been updated to include new data on vaccine effectiveness.  
44

45 Table 3 has been updated to include current vaccines that are approved in at least 1 county,  
46 that are not discussed in the main manuscript text.  
47  
48  
49

#### 50 Comment

51 7. Please include a section on **EMERGING TREATMENTS**: Please include a brief section on new  
52 techniques and advances that are currently being studied, cite the appropriate studies, and say  
53 when they will report.  
54  
55

#### 56 Response

57 Thank you, we have now included this section with some discussion of recently approved  
58 drugs and those in development:  
59  
60

“7. Emerging Treatments



1  
2  
3  
4  
5  
6  
7  
8  
9  
10  
11  
12  
13  
14  
15  
16  
17  
18  
19  
20  
21  
22  
23  
24  
25  
26  
27  
28  
29  
30  
31  
32  
33  
34  
35  
36  
37  
38  
39  
40  
41  
42  
43  
44  
45  
46  
47  
48  
49  
50  
51  
52  
53  
54  
55  
56  
57  
58  
59  
60

*As more is learnt about the virus, the therapeutic strategy against COVID-19 develops. There are currently over two thousand ongoing trials assessing certain treatment strategies for COVID-19(216). Recently, antivirals including molnupiravir (Lagevrio) and nirmatrelvir/ritonavir (Paxlovid) have been approved in the UK(217, 218), US(219, 220), and Europe(221, 222) for treating COVID-19 in certain risk groups. Similarly, sotrovimab (Xevudy), a monoclonal antibody treatment, has recently been approved for use in treating certain COVID-19 patients in the UK(223), US(224), and Europe(225). These drugs have been shown to be effective at preventing poor clinical outcomes, including death, in those vulnerable to severe COVID-19 infection. Other drug treatments, such as janus kinase inhibitors, corticosteroids, and anti-inflammatories have contrasting evidence to support their use, and therefore, the use of specific drugs is either recommended for or against by certain treatment and management guidelines, which are discussed below."*

#### Comment

8. **GUIDELINES:** Please cite any relevant international guidelines and say how they differ, what their strengths and weaknesses are, and under what circumstances they are most appropriate. Please give preference to the most independent and recently updated guidelines.

#### Response

*Thank you, we have now included this section to outline which treatment guidelines are available for COVID-19.*

*"8. Guidelines*

*The treatment and management of COVID-19 is a continually evolving topic, however, health authorities have published and continue to update guidelines and recommendations for treating COVID-19. The WHO living guideline on COVID-19 and therapeutics is regularly updated, with the latest version, published on 14th January 2022 containing 14 recommendations on COVID-19 treatment(226). In the UK, the National Institute for Health and Care Excellence (NICE)(227) and Medicines and Healthcare products Regulatory Agency (MHRA)(228) provide updated guidelines on COVID-19 treatment, while in Europe, the ECDC regularly publishes several guidelines providing recommendations on a range of COVID-19 related topics(229). In the US, the National Institutes of Health (NIH)(230) and the CDC(231) provide guidance on COVID-19 treatment and management, with the CDC supplying guidelines for specific groups including, employers, schools, health departments, and governments."*

#### Reviewer: 1

#### Comment

1. In the section "3. Viral transmission, clinical presentation, and genetic susceptibility of COVID-19", there could be a further briefing of the spectrum of the characteristic symptoms (clinical characteristics). It would also benefit by mentioning that the whole of the population would be susceptible to COVID-19 although there exist some subgroups more susceptible to develop poorer clinical outcomes.

#### Response

Thank you, we have added to this section to mention the broad spectrum of COVID-19 symptoms and have mentioned that although everyone is susceptible to covid-19, some groups are more susceptible to poorer outcomes:

*"The clinical presentation of COVID-19 is non-specific, heterogeneous, and infection can result in a wide spectrum of symptoms. Following an incubation period of 4-14 days, symptoms develop ranging*

1 from mild to severe disease and, in some cases, can result in death(12). The most common COVID-19  
2 symptoms include fever, cough, dyspnoea, and fatigue(13, 14), while myalgia, gastrointestinal issues,  
3 cognitive deficits, and other symptoms are reported. Asymptomatic individuals can also test positive  
4 for COVID-19(15, 16). Although the entire population is susceptible to COVID-19 infection, some  
5 subgroups within the general population exist that are more susceptible to developing poorer clinical  
6 outcomes.”  
7

## 8 Comment

- 9
- 10 2. Also within the same section, the description for the gene loci associated with the risk of severe  
11 disease could be streamlined a bit since the contents did not seem to be aligned well in the current  
12 form. There could also be the introduction regarding the polygenetic risk score and the  
13 comorbidities (e.g., COPD) for predicting the susceptibility to COVID-19.  
14  
15

## 16 Response

17  
18 *Thank you for this comment. This section has been shortened in order to keep the focus*  
19 *firmly on the main topics of the article. We have also included a short introduction of*  
20 *polygenetic risk scores and how they may be used along with comorbidities to infer risk of*  
21 *COVID-19:*  
22

23  
24 “The utilisation of polygenetic risk scores (PRS) may be useful in determining an individual’s risk for  
25 developing severe disease caused by COVID-19(35). A PRS infers a person’s risk of susceptibility to or  
26 development of a certain disease based on the total number of genomic variations they possess.  
27 Determining PRS with the inclusion of comorbidities, such as chronic obstructive pulmonary  
28 disease(36), or other aspects, such as coagulation factors(37), may improve the usefulness of PRS in  
29 determining a person’s risk of severe COVID-19.”  
30  
31

## 32 Comment

- 33
- 34 3. In the section "4. Virology of SARS-CoV-2", it would be better to summarize the duration that the  
35 SARS-CoV-2 could survive in the environment (e.g., metal surface, etc.).  
36

## 37 Response

38  
39 *Towards the end of section “4. Virology of SARS-CoV-2”, which now provides a useful*  
40 *description of how long the virus can survive in the environment, which is a contributing*  
41 *factor to its transmission:*  
42

43  
44 *“The SARS-CoV-2 virus may survive on surfaces or suspended in air droplets for varying periods of time.*  
45 *Indeed, on plastic, stainless steel, and glass surfaces, the half-life of the virus is around 5.3, 4.4, and*  
46 *4.2 hours, respectively(7), with no difference seen between SARS-CoV-2 variants(8). Although SARS-*  
47 *CoV-2 can be detected on inanimate surfaces for hours and days, due to the evaporation of water*  
48 *droplets, the viruses’ living environment, the concentration of the virus plummets rapidly(9). Protective*  
49 *measures, including using personal protective equipment (PPE), maintaining indoor ventilation, and*  
50 *disinfecting hands and surfaces, can effectively limit the spread of SARS-CoV-2(10).”*  
51

## 52 Comment

- 53
- 54 4. Perhaps it would merit if the conformational changes of the S protein that occur after binding with  
55 the host cell be described.  
56

## 57 Response

58  
59 *Thank you. To address this comment, we have added a short description of the S protein*  
60 *structure and the conformational changes that occur:*

1  
2  
3  
4  
5  
6  
7  
8  
9  
10  
11  
12  
13  
14  
15  
16  
17  
18  
19  
20  
21  
22  
23  
24  
25  
26  
27  
28  
29  
30  
31  
32  
33  
34  
35  
36  
37  
38  
39  
40  
41  
42  
43  
44  
45  
46  
47  
48  
49  
50  
51  
52  
53  
54  
55  
56  
57  
58  
59  
60

*“The subunits of the trimeric S complex are either in a closed (pre-fusion stage) or open (post-fusion stage) conformation(62), with one subunit always in an open conformation to allow for ACE2 recognition and binding(63). The RBD itself consists of five anti-parallel  $\beta$ -strands surrounded by several  $\alpha$ -helices(64). From closed to open conformation, the RBD undergoes structural rearrangement whereby the globular head region rotates clockwise, which alters its electropotential surface(64). Once positioned, numerous residues within the RBD form either hydrogen bonds or salt bridges with residues of the ACE2 receptor, allowing for tight binding(65), while the concave structure of the RBD allows for three distinct binding regions(64).”*

**Comment**

5. Not sure why there should be the section "4.1 Other human coronaviruses" which seemed less relevant to the topic.

**Response**

*Thank you, we agree that this section was less relevant and did not add much to the overall manuscript, therefore, this section has been removed.*

**Comment**

6. In the section "5. Variants of SARS-CoV-2" perhaps it would not be necessary to address the abbreviations for VOI and VUM again since this has already been introduced well before.

**Response**

*Thank you, we agree with this comment. As VOC/VOI/VUM have been defined previously in the introduction, it is not needed here. This repetition of definitions has been removed from section 5.*

**Comment**

7. I am afraid that the authors should contemplate on what the focus of the VOC should be. Basic science or clinical themes? Most of the current efforts seemed to focus on the former rather than the latter. However, the impact of the variants on the subsequent waves of outbreaks globally would seem more important to the epidemiologist and clinicians. This is perhaps most relevant to the Delta strain.

**Response**

*This is an important point and we have included the following section to stress the importance of the clinical themes, in addition to the basic science in regard to VOCs: “The current method of identifying variants relies on the use of genomic testing such as whole genome sequencing, partial S-gene sequencing, or nucleic acid amplification technique (NAAT)-based assays(72). The aspects of different variants that most people experience, however, is the clinical symptoms they inflict. Certain variants induce a greater risk of severe disease and death, such as Alpha and Delta(73), while others are more likely to induce milder symptoms, such as Omicron(74, 75). Moreover, individual symptoms can differ between variants. For example, the Gamma variant is associated with inflicting anosmia and dysgeusia(76), which is less commonly seen in Omicron infections. Moving forward, the clinical themes and symptoms associated with emerging variants should be elucidated rapidly in order for the public and healthcare professionals to rapidly identify possible cases of COVID-19.”*

**Comment**

8. The section "6. Vaccinations" seemed to be a pile-up of the evidence without a clear focus. I am afraid that not all identical weight should be given to the different vaccines. Moreover, the most



well-proven efficacy, safety, reactogenicity and adverse events should be summarized in a clearer way.

## Response

*We agree that this section had little focus and certain vaccines should have greater weight than others. We have attempted to address this by giving the major vaccines the majority of the weight and giving each vaccine section a clear structure: i) what the vaccine is ii) immunogenicity iii) reactogenicity iv) safety/adverse events v) mention that effectiveness can be seen in table 2. To save on words, effectiveness has not been fully outlined in the text, instead table 2 outlines studies that give estimations of effectiveness for each vaccine. This section now reads as:*

### *“6. Vaccinations*

*The COVID-19 pandemic prompted a rapid international search for safe and effective vaccines against the SARS-CoV-2 virus. In line with previous vaccine development, including for both SARS-CoV and MERS-CoV, the S protein was a key target for COVID-19 vaccine development(154). As of 24th January 2022, 33 approved vaccines are in use in 197 countries, with ten vaccines having gained emergency use listing approval from the WHO(4), (table 2). As of 25th January 2022 there are 194 vaccines in pre-clinical development and 140 in clinical development(155). Numerous studies have explored the effectiveness of approved vaccines, however, large variations in vaccine effectiveness are reported. This variability is likely due to several factors in the studies including, the country, date, and population size of the study, as well as the SARS-CoV-2 variants circulating during the study period. These factors, along with how the effectiveness is reported, mean that it is difficult to compare vaccines and fully understand how effective each vaccine is. Here, we review the COVID-19 vaccines in use around the world.*

#### *6.1 Pfizer/BioNTech - BNT162b2*

*The BNT162b2 vaccine (Comirnaty) is a lipid nanoparticle-formulated, nucleoside-modified mRNA vaccine encoding a modified SARS-CoV-2 S protein which was developed through a collaborative effort between Pfizer (New York, US) and BioNTech (Mainz, Germany)(156, 157). BNT162b2 gained WHO emergency use listing on 31st December 2020(158) and, as of 24th January 2022, has been approved for use in 136 countries(4). Following administration of BNT162b2, a Th1-biased response is observed, with tumour necrosis factor alpha (TNF $\alpha$ ), interferon gamma (IFN $\gamma$ ), and interleukin-2 (IL-2) all elevated following vaccination, compared to placebo(159, 160). Highest neutralisation titres are found between seven and fourteen days following the second dose(161), while those previously infected with COVID-19 showed a four-fold increase in antibody binding and a 18-fold increase in neutralisation titres compared to previously uninfected individuals following two-doses(162). The BNT162b vaccine is well tolerated, with limited reactogenicity. Redness and swelling at injection site have been reported, however mild or moderate pain at the injection site is the most commonly reported reaction to vaccination(161). Fatigue, muscle pain, headache and chills are other commonly reported symptoms following BNT162b2 administration(163). The rate of systemic reactions after a second dose of BNT162b has been found to be 1.7 to 2 times higher than after a first dose, possibly suggesting an immunity-boosting effect(164). Many safety reports of this vaccine describe no serious adverse events(161, 164, 165), however, a large study found that BNT162b2 was associated with an increased risk of myocarditis, lymphadenopathy, appendicitis, and herpes zoster*

1  
2  
3  
4  
5  
6  
7  
8  
9  
10  
11  
12  
13  
14  
15  
16  
17  
18  
19  
20  
21  
22  
23  
24  
25  
26  
27  
28  
29  
30  
31  
32  
33  
34  
35  
36  
37  
38  
39  
40  
41  
42  
43  
44  
45  
46  
47  
48  
49  
50  
51  
52  
53  
54  
55  
56  
57  
58  
59  
60

*infection(166). Although rare, allergic reaction or anaphylaxis has also been reported following administration of the BNT162b2 vaccine(163). Table 2 outlines clinical trial and real-world data for vaccine effectiveness.*

## 6.2 Oxford-AstraZeneca – AZD1222

*The AZD1222 vaccine (Vaxzevria) is a non-replicating vector of the chimpanzee adenovirus ChAdOx1, modified to encode the SARS-CoV-2 S protein(167). Developed through collaboration between the University of Oxford and AstraZeneca (Cambridge, UK), this vaccine was given WHO emergency use listing on 16th February 2021(158) and has been approved for use in 137 countries, as of 24th January 2022(4). The WHO has granted emergency use listing to two versions of this vaccine (AZD1222 and Covishield) in order to utilise Covishield as part of their worldwide COVAX initiative, which is being produced by the Serum Institute of India and AstraZeneca-SKBio (Republic of Korea)(168).*

*Following administration of AZD1222, significant antibody production, predominantly of IgG1 and IgG3 subclasses, and a Th-1 cell response, with increased expression of IFN $\gamma$  and TNF $\alpha$ , is seen(122, 169). One dose of AZD1222 has been shown to produce a neutralising antibody response in 91% of participants, while a second dose resulted in 100% of participants producing neutralising antibodies(170). Mild and moderate itch, pain, redness, swelling, tenderness, and warmth are common local reactions, while chills, fatigue, fever, headache, muscle ache, and nausea are commonly reported systemic reactions following AZD1222 administration(170). Rare symptoms, including severe chest pain, nasal bleeding, and allergic reaction have been reported following AZD1222 administration(171). Table 2 outlines clinical trial and real-world data for vaccine effectiveness.*

## 6.3 Johnson & Johnson - Ad26.COV.2.S

*The Ad26.COV.2.S vaccine is a non-replicating adenovirus vector, modified to contain the SARS-CoV-2 S protein in a prefusion-stabilised conformation and requires a single dose(172). This vector was developed from the recombinant human adenovirus type 26 by the Janssen pharmaceutical company of Johnson & Johnson (New Brunswick, New Jersey, US)(172) and was listed for WHO emergency use listing on 12th March 2021(158). As of 24th January 2022, Ad26.COV.2.S has been approved for use in 106 countries(4).*

*The Ad26.COV.2.S vaccine induces the production of a variety of antibody subclasses, such as IgG, IgM and IgA, and promotes several non-neutralising antibody responses, including activation of CD4+ and CD8+ Th1-cells and production of IFN $\gamma$ , IL-2, and TNF $\alpha$ (173, 174). Although neutralising antibody responses induced by Ad26.COV.2.S are reduced against SARS-CoV-2 variants, non-neutralising antibody and T-cell responses have been found to be preserved against VOC(173), while a prior COVID-19 infection significantly increases levels of S protein-binding antibodies, antibody-dependent cellular cytotoxicity, and neutralising antibodies against VOCs including Beta and Delta(175). Ad26.COV.2.S is safe and well tolerated, with a large clinical trial demonstrating that headache, fatigue, and myalgia, are the most common systemic reactions, while injection-site pain is the most common local reaction following administration(172). Like other vaccines, Ad26.COV.2.S has been associated with serious adverse events, such as allergic reactions and cerebral venous sinus thrombosis, however, these are rare(163, 176). Table 2 outlines clinical trial and real-world data for vaccine effectiveness.*

## 6.4 Moderna – mRNA-1273

1 The mRNA-1273 vaccine (Spikevax) developed by Moderna (Massachusetts, US) is a  
2 lipid-nanoparticle-encapsulated mRNA vaccine expressing the SARS-CoV-2 S protein that has  
3 been prefusion-stabilised(177). This vaccine gained WHO emergency use listing on 30th April  
4 2021(158), and as of 24th January 2022, has been approved for use in 85 countries(4).

5 The mRNA-1273 vaccine elicits a strong CD4+ Th-1 cell response, with TNF $\alpha$ , IFN $\gamma$ ,  
6 and IL-2 expression increased following administration(178-180), while neutralising antibody  
7 titres have been shown to significantly increase up until around 28 days following the second  
8 dose of the vaccine, and afterwards remain consistently high(181). Fatigue, muscle pain,  
9 headache, chills, joint pain, and injection-site pain/reaction are common adverse effects  
10 caused by the mRNA-1273 vaccine(163, 177), while serious adverse effects are often  
11 avoided(177, 181). Serious adverse events, including allergic reaction and anaphylaxis are  
12 rare, but not inconceivable following mRNA-1273 administration(163). Table 2 outlines  
13 clinical trial and real-world data for vaccine effectiveness.  
14  
15  
16  
17  
18

### 19 6.5 Other WHO emergency use listed COVID-19 vaccines

20 In addition to the five COVID-19 vaccines described previously, five other vaccines  
21 have gained emergency use listing by the WHO. First, the Sinopharm BBIBP-CorV COVID-19  
22 vaccine (Covilo) was developed by the Beijing Bio-Institute of Biological Products, a  
23 subsidiary of China National Biotec Group, and was given WHO emergency use listing on 7th  
24 May 2021(158). This vaccine is a 19nCoV-CDC-Tan-HB02 strain SARS-CoV-2 antigen that is  
25 produced in Vero cells, inactivated by  $\beta$ -propiolactone, and then purified and absorbed with  
26 aluminium hydroxide(182). Next, the CoronaVac vaccine, developed by Sinovac Biotech  
27 (Beijing, China), was listed for WHO emergency use on 1st June 2021(158). Like the BBIBP-  
28 CorV vaccine, this vaccine is a Vero cell-based, aluminium hydroxide-adjuvanted,  $\beta$ -  
29 propiolactone-inactivated vaccine, however, it is based on the SARS-CoV-2 CZ02 strain(183).  
30 Covaxin (BBV152) is a whole virion inactivated SARS-CoV-2 vaccine formula developed by  
31 Bharat Biotech International Ltd (India)(184) which gained emergency use listing from the  
32 WHO On 3rd November 2021(185). Lastly, Covovax and its originator, Nuvaxovid (NVX-  
33 CoV2372), were both developed by Novavax (Maryland, United States) and the Coalition for  
34 Epidemic Preparedness Innovations (Oslo, Norway), and gained emergency use listing on  
35 17st and 21th December 2021, respectively(186, 187). Both vaccines are manufactured using  
36 the same technology, and consist of a recombinant SARS-CoV-2 S protein nanoparticle  
37 administered with the adjuvant Matrix-M as a co-formulation(188). These vaccines produce  
38 similar immune responses to those already discussed. Studies assessing the efficacy of these  
39 vaccines are outlined in table 2.  
40  
41  
42  
43  
44  
45  
46  
47

### 48 6.10 Other approved vaccines

49 In addition to the vaccines that have received emergency use listing from the WHO,  
50 around the world, vaccines have been developed, tested and approved to combat COVID-19.  
51 As of 24th January 2022, 33 vaccines, including the ten described above, have been  
52 approved in at least one country(4). The remaining 23 approved vaccines are outlined in  
53 table 3.”  
54  
55

#### 56 Comment

- 57  
58 9. Overall, I appreciate the section "6.8 Waning immunity and boosters" but perhaps it would also  
59 merit if the interval between the 2nd and 3rd vaccine could be outlined.  
60

#### Response

1 Thank you, we have now added the following statement that outlines the recommended  
2 time interval between the 2<sup>nd</sup> and 3<sup>rd</sup> doses:

3 *“Based on current evidence, the CDC recommend that the time interval for receiving a booster  
4 following the primary regimen is five months for Pfizer/BioNTech BNT162b2 primary regimen, six  
5 months for Moderna mRNA-1273 primary regimen, and two months for Johnson & Johnson  
6 Ad26.COVS primary regimen(216).”*

7  
8  
9 **Reviewer: 2**

10 Major comments:

11  
12  
13 **Comment**

- 14  
15 1. Although this is not a systematic review, selecting 227 articles from the enormous covid-19  
16 literature, especially including bioRxiv and medRxiv, must involve many layers of judgment. It'd be  
17 important to include more details on this selection than currently-included two sentences.  
18

19  
20 **Response**

21 Thank you for this comment. As mentioned in the editor's comment 3, we have included  
22 more detail on the selection criteria that we used in the methods section, and more so in  
23 the supplementary file.  
24  
25

26  
27 **Comment**

- 28 2. Dating: Tables 1 & 2, either in the table or legends need to clearly mark the data and definitions are  
29 as of [mm/dd/yyyy], as the authors acknowledged all these variant classification/vaccine data are  
30 dynamic.  
31

32  
33 **Response**

34  
35 *Thank you, the dynamic nature of this topic does require a time stamp like this. In the legend  
36 of table 1, we have now included that “information is correct as of 24<sup>th</sup> January 2021”. While  
37 in table 2, we have added the dates which the studies took place to and from in order to give  
38 clarity on these data. Similarly we have included the date when information was correct  
39 from in table 3.*  
40  
41

42  
43 **Comment**

- 44 3. Large variations in vaccine effectiveness %: could these possibly be explained by the country/study  
45 date/variants of the publications that were listed? Table 2 made it evident that there were variable  
46 sample sizes and COVID-19 definition of VE against (and in some cases variants), but it remains  
47 unclear to the reader why there could be such large variations.  
48

49  
50 **Response**

51 We agree that the large variations in vaccine effectiveness reported by studies are confusing  
52 and required clarification. We have explained in section 5 why these variations may occur:  
53 *“Numerous studies have explored the effectiveness of approved vaccines, however, large  
54 variations in vaccine effectiveness are reported. This variability is likely due to several factors  
55 in the studies including, the country, date, and population size of the study, as well as the  
56 SARS-CoV-2 variants circulating during the study period. These factors, along with how the  
57 effectiveness is reported, mean that it is difficult to compare vaccines and fully understand  
58 how effective each vaccine is. Here, we review the COVID-19 vaccines in use around the  
59 world.”*  
60



**Comment**

- 1  
2  
3  
4  
5  
6  
7  
8  
9
4. Considerations for the future: The reviewer feels this is the weakest part of the review manuscript, making only vague/broad statements, not considering examples where covid-19 was controlled (ex. Taiwan, New Zealand). Even in countries with fluctuations, some key approaches have worked but are not discussed here. Ex. The rollout of rapid-testing and quarantine of positive cases, especially given asymptomatic individuals can also spread infections.) This part needs to be largely improved upon or toned down in the abstract.

**Response**

10  
11  
12  
13  
14  
15  
16

*Thank you, we agree with this comment and therefore have re-written this section to include two main parts; what went wrong, and what went right when attempting to control COVID-19:*

17  
18

*“9. Considerations for the future*

19  
20  
21  
22  
23  
24  
25  
26  
27  
28  
29  
30  
31  
32  
33  
34  
35  
36  
37  
38  
39  
40  
41  
42  
43

*Novel infectious diseases and pandemics are an unpredictable but inevitable aspect of nature and it is, therefore, important that we learn from past pandemics to prepare for future ones. Firstly, the COVID-19 pandemic has highlighted and amplified the existing inequalities within society(234), with non-white ethnicity, social disadvantage, and unemployment all risk factors for testing positive for COVID-19(235) and those most economically deprived found to be particularly vulnerable(236). These inequalities require addressing in order to be better prepared for similar situations in the future. Next, to progress through a pandemic we should be racing the pathogen, not each other. This statement becomes apparent when you consider the problems countries faced when seeking out PPE(237), and the vaccine inequity seen around the world(238), with developed countries often better placed to be able to purchase these items. Initiatives such as the WHO’s COVAX programme are vital in order to protect those most vulnerable and reduce the global spread of disease. In October 2021, the UK government released a publication outlining where the policies implemented to reduce the impact of the COVID-19 pandemic failed, and the lessons learned from these failures (239). Here, it is clear that there is room for improvement, with the publication presenting conclusions and recommendations on how to enhance pandemic preparedness, lockdown and social distancing measures, testing and contact tracing, social care, and vaccines. In countries such as the UK, US, and much of Europe, where the COVID-19 death rate has been high, steps need to be taken and lessons need to be learnt in order to be better prepared for the next pandemic. The responsibility of improving pandemic response lies with policy makers, the medical/scientific community, and the public, and will ultimately require a collaborative approach.*

44  
45  
46  
47  
48  
49  
50  
51  
52  
53  
54  
55  
56  
57  
58  
59  
60

*Certain aspects of the response to the COVID-19 pandemic have been a triumph, however. One of the major victories was the rapid development and rollout of vaccines(240), which continue to be effective. The rollout of rapid testing and quarantine for positive cases was also important to at least disrupt the spread of the virus, especially given that asymptomatic individuals can contribute to the spread. Furthermore, the swift identification and sharing of knowledge of SARS-CoV-2 variants between countries should be applauded. Lessons can be learned from countries where COVID-19 was controlled. In Taiwan, managing the pandemic as directed by pre-COVID-19 pandemic plans prompted an immediate response; screening of all airline passengers arriving from Wuhan and high risk areas, restricting entry for non-Taiwanese citizens, 14-day quarantine period for contacts of confirmed cases or returning travellers, a ban on large gatherings, and widespread mask wearing were some of the quickly implemented management strategies(241). New Zealand implemented similarly effective restrictions, with the addition of a national lockdown(241). Many of the pandemic control components that kept case and death numbers low in Taiwan and New Zealand could be adopted by other countries in the future and may lead to greater outcomes in terms of protecting both health of individuals and the health and wellbeing of the country. Overall, there is much to be*

1  
2  
3  
4  
5  
6  
7  
8  
9  
10  
11  
12  
13  
14  
15  
16  
17  
18  
19  
20  
21  
22  
23  
24  
25  
26  
27  
28  
29  
30  
31  
32  
33  
34  
35  
36  
37  
38  
39  
40  
41  
42  
43  
44  
45  
46  
47  
48  
49  
50  
51  
52  
53  
54  
55  
56  
57  
58  
59  
60

*learnt from the COVID-19 pandemic and, as we emerge from it, inspection of which policies failed, and which succeeded are imperative.”*

Minor comments:

**Comment**

1. Table 1 is a great summary of variants, if journal format allows, color-coding the mutations could allow people to quickly digest which variants share which mutations.

**Response**

*Thank you, we agree that colour coding the mutations shared by different variants make it clearer to quickly digest the information, so have colour coded the mutations accordingly.*

**Comment**

2. Figure 1, the texts in the figures (ex. D614G, ORF6, variant designations) could be enlarged

**Response**

Thank you, the text in figure 1 has been enlarged to make for easier reading.

**Reviewer: 3**

**Comment**

1. This review was not written in the systematic review format, which authors can use the statistical method to measurement the significant different between virology variant and vaccine aspects.

**Response**

*Thank you for this comment. As this is not a systematic review in the strictest sense, we believe that this is difficult. We have aimed to explore the relationships between vaccines and circulating variants where possible, for example, where vaccine effectiveness against certain variants is stated in articles, we include it in table 2, while the dates that studies took place from and to are included and can be correlated with circulating variants.*

**Comment**

2. The criteria of choosing and exclude scientific data / paper need to be explained to eliminated the potential bias.

**Response**

*Thank you, as mentioned in previous responses, we have updated the methods section and included a supplementary file to explain our search and inclusion criteria.*

**Comment**

3. Since, the severity of diseases did not depend on only viral genetic, host, and immune status, as well as significant risk factors, but also depend on medical treatment and duration of onset in each data set which are important confounding factors.

**Response**

1  
2  
3  
4  
5  
6  
7  
8  
9  
10  
11  
12  
13  
14  
15  
16  
17  
18  
19  
20  
21  
22  
23  
24  
25  
26  
27  
28  
29  
30  
31  
32  
33  
34  
35  
36  
37  
38  
39  
40  
41  
42  
43  
44  
45  
46  
47  
48  
49  
50  
51  
52  
53  
54  
55  
56  
57  
58  
59  
60

*Indeed, duration of disease and the treatment patients receive are important factors in determining the severity of disease patients endure, we have included the following statement to cover this:*

“The duration of symptoms endured by COVID-19 patients, as well as the treatment they receive will also have profound influences on the severity of disease they experience and both the acute and long-term outcomes following recovery.”

#### Comment

4. Most of review data are not suitable for publication in the modern scientific format but can be re-written with additional level of evidence based medicine.

#### Response

*We believe that the review is written in a concise and methodical manner with all comments supported by published evidence and suitable data.*

#### Comment

5. The basic knowledge and 3D structure of spike RBD and NTD molecule in each mutation and vaccine sequence antibody (MRNA)/ (VIRAL VECTORS) should be reviewed if authors want to determine the correlation of vaccine efficacy and variant of SARS-CoV-2. The authors can use the essential real world data of vaccine effectiveness to determine the response of vaccine across the variant in different time and place of epidemic.

#### Response

*Thank you. Due to the limited word count available, it was not possible to explain the spike protein 3D structure changes caused by each mutation, however we have detailed the structure of the spike protein and where the mutations are located within the spike. We have indicated that mutations within the spike alter its 3D structure and influence immune escape:*

*Section 4:*

*“The subunits of the trimeric S complex are either in a closed (pre-fusion stage) or open (post-fusion stage) conformation(62), with one subunit always in an open conformation to allow for ACE2 recognition and binding(63). The RBD itself consists of five anti-parallel  $\beta$ -strands surrounded by several  $\alpha$ -helices(64). From closed to open conformation, the RBD undergoes structural rearrangement whereby the globular head region rotates clockwise, which alters its electrostatic surface(64). Once positioned, numerous residues within the RBD form either hydrogen bonds or salt bridges with residues of the ACE2 receptor, allowing for tight binding(65), while the concave structure of the RBD allows for three distinct binding regions(64).*

*Section 5:*

*“Many of the mutations observed in SARS-CoV-2 variants are found within the RBD or the N-terminal domain of the S protein, which alters the three-dimensional structure of the S protein. Not only can these changes affect the transmission abilities of the virus, but can also allow it to better escape the immune response, including from neutralising antibodies either elicited through vaccine administration or natural infection.”*

#### Comment

6. The booster dose data should be reviewed in term of antibody response and T cell response.

#### Response

*Thank you, we agree with this and we have now included some discussion of antibody and T-cell responses following booster dose:*

<https://mc.manuscriptcentral.com/bmjmedicine>

1  
2  
3  
4  
5  
6  
7  
8  
9  
10  
11  
12  
13  
14  
15  
16  
17  
18  
19  
20  
21  
22  
23  
24  
25  
26  
27  
28  
29  
30  
31  
32  
33  
34  
35  
36  
37  
38  
39  
40  
41  
42  
43  
44  
45  
46  
47  
48  
49  
50  
51  
52  
53  
54  
55  
56  
57  
58  
59  
60

*“Since booster programmes began, evidence that a booster vaccine dose enhances antibody and cellular responses has accumulated. Following a third dose of vaccine, neutralising antibody titres increase significantly(199-202) and, in some cases, to higher levels than after the primary two doses(199). Additionally, boosters have also been found to increase neutralising antibody titres against Beta, Gamma, Delta, and Omicron variants(200, 203, 204). T-cell response is also enhanced following a third dose(201, 205, 206). Together, enhancing neutralising antibody and cellular responses with a booster vaccine dose is likely to provide a greater level of protection than relying on immunity built through a primary regimen.”*

#### **Reviewer: 4**

#### **Comment**

##### 1) Introduction

- Line 22 - can you include the difference between VOI and VUM? e.g. in VUM evidence of phenotypic or epidemiological effect is currently unclear, and a name has not yet been assigned.

#### **Response**

*Thank you, we agree that the differences between VOC, VUI and VUM should have been defined more clearly to include the difference between each. We have updated this as follows:*

*“The World Health Organisation (WHO) classify SARS-CoV-2 variants that increase transmissibility, disease severity or virulence, or decrease the effectiveness of public health measures, diagnostics, therapeutics or vaccines as variants of concern (VOC). Variants with genetic changes that are predicted to enhance the virulence and transmissibility of the virus which have been identified to cause community transmission in multiple countries posing a possible risk to global public health are defined as variants of interest (VOI). Lastly, the WHO defines variants with genetic changes that are suspected to affect virus characteristics and have currently unclear phenotypic or epidemiological effects as variants under monitoring (VUM). VUM are not typically assigned a name until they are upgraded to VOI or VOC. The full working definitions of VOC, VOI and VUM can be found on the WHO ‘tracking SARS-CoV-2 variants’ website: [www.who.int/en/activities/tracking-SARS-CoV-2-variants/\(3\)](http://www.who.int/en/activities/tracking-SARS-CoV-2-variants/(3)).”*

#### **Comment**

##### 2) Methods

- Including the specifics of how the searches were done would add clarity (maybe as a supplementary file), many of the terms which were searched for are not specific

#### **Response**

*Thank you, clarity on the search terms and selection criteria was needed. We have included a supplementary file which includes the specific search terms that we used as well as the selection criteria that was implemented for different sections of the review.*

#### **Comment**

##### 3) Transmission

- Line 32 - maybe use "biological material" instead of "biological samples", presumably the virus doesn't normally spread via the samples themselves

#### **Response**

*Thank you, this has been changed from “biological samples” to “biological material”*



**Comment**

## 4) Virology

Page 6

line 8 typo - "interacting WITH host cell organelles"

line 25 - both halves of this sentence are talking about TMPRSS2 but it doesn't sound like it

**Response***Thank you, these errors have been corrected:**"with" has now been inserted into "interacting WITH host cell organelles".**The TMPRSS2 sentence has been amended:**"Meanwhile, TMPRSS2, a host cell protease, facilitates fusion of the viral and host cell membranes(68), and may play a role in the spread of the virus in the airways(68)."***Comment**

## 5) VOC

- You frequently refer to an increase in these variants, and state or imply that this is relative to the wild-type. Can you include a section at the start of 5 where you specify what that wild-type is? Is it clear that samples from a particular time period or geographic area are wild-type?

**Response***Thank you. We agree that simply using 'wild-type' to discuss a SARS-CoV-2 strain is confusing. Firstly, we have changed this wording to refer to the initial strain that emerged from Wuhan as the 'primary strain, and have described what is meant by that at the end of section 5:**"Herein, we report studies that compare SARS-CoV-2 variants to the 'primary' virus strain. 'Primary strain' refers to the strain of the virus that first emerged in Wuhan, China at the end of 2019 and spread around the world in the first wave of infections, which is often also referred to as the Wuhan-Hu-1, B.1, or wild-type strain."***Comment**

## 6) VOC - Alpha

line 22 typo "probable" not "probably"

line 48 typo "de-escalated"

**Response***Thank you for highlighting these errors.**Due to re-wording of this section, "probably" has now been removed, while "de-escalated" has been amended.***Comment**

## 7) 5.1.4 VOC – Delta

- p10 48 Transmissibility of Delta is 97% greater, or three times Alpha, Beta and Gamma?
- p10 54 Isn't replication rate a factor in transmissibility rather than an addition to it?
- p11 line 27 - when you talk about younger people, can you specify which age cutoff you are talking about?

**Response**

1 *Thank you for identifying this.*

2 *The transmissibility sentence was worded poorly in the original manuscript, this has been*  
 3 *amended to explain exactly what is meant:*

4 *“It was estimated that the reproduction number of the Delta variant is 97% greater than non-*  
 5 *VOC/VOI and approximately three times that of the Alpha, Beta, and Gamma variants(110),”*  
 6  
 7

8 *We agree that replication rate is a factor in transmissibility, therefore we have amended this*  
 9 *sentence:*

10 *“The fast replication rate of Delta likely contributes to its increased transmissibility compared to*  
 11 *Alpha, Beta, and Gamma.”*  
 12  
 13

14 *We also agree that it was unclear what “younger people” meant, we have amended the*  
 15 *statement as follows:*

16 *“Lastly, a study in India found that the risk of death was around 1.8 times higher for Delta infections,*  
 17 *while Delta also infected and induced symptoms in a greater proportion of younger people (0-19*  
 18 *years old), compared to the primary strain(131).”*  
 19  
 20  
 21

## 22 **Comment**

23  
 24 8) Vaccination 6.1 Pfizer  
 25 line 15 - typo repeating "elicit a strong"

26  
 27  
 28 6.3 Johnson and Johnson

29 - Line 9 a bit unclear, is the point that there is a time lag of around 28 days before peak  
 30 effectiveness? After second dose? And compared with how many days?  
 31

32 6.6 Sinovac

33 Line 6 - typo "alike" should be "like"

34  
 35 6.8 Boosters

36 Line 56 typo "On 30th July 2021" appears twice  
 37  
 38

## 39 **Response**

40  
 41 *Thank you.*

42 *Repetition of “elicit a strong” has been corrected.*

43 *Due to re-wording of the manuscript, the statement commenting on the time lag of around*  
 44 *28 days before peak effectiveness has been removed.*

45 *“like” now replaces “alike” within the Sinovac section.*

46 *The second appearance of “On 30th July 2021” has been removed.*  
 47  
 48

## 49 **Comment**

50  
 51 8 Conclusions

52  
 53 - Line 23 "Yet to be eradicated" - this is absolutely true; but this is unlikely to happen for decades if  
 54 ever, and there are other more immediate unmet goals it might be better to mention, such as  
 55 attaining high vaccination coverage globally, ensuring all health systems have the capacity to cope  
 56 with seasonal waves.  
 57  
 58

## 59 **Response**

60 *Thank you, we agree that “yet to be eradicated” is possibly a misleading statement. We have*  
*amended this part of the conclusion as follows:*

<https://mc.manuscriptcentral.com/bmjmedicine>

1  
2  
3  
4  
5  
6  
7  
8  
9  
10  
11  
12  
13  
14  
15  
16  
17  
18  
19  
20  
21  
22  
23  
24  
25  
26  
27  
28  
29  
30  
31  
32  
33  
34  
35  
36  
37  
38  
39  
40  
41  
42  
43  
44  
45  
46  
47  
48  
49  
50  
51  
52  
53  
54  
55  
56  
57  
58  
59  
60

*“Although rollout of vaccines has been successful, we must aim to address unmet goals, such as attaining a high global vaccination coverage and ensuring that all healthcare systems have the capacity to cope with seasonal waves.”*

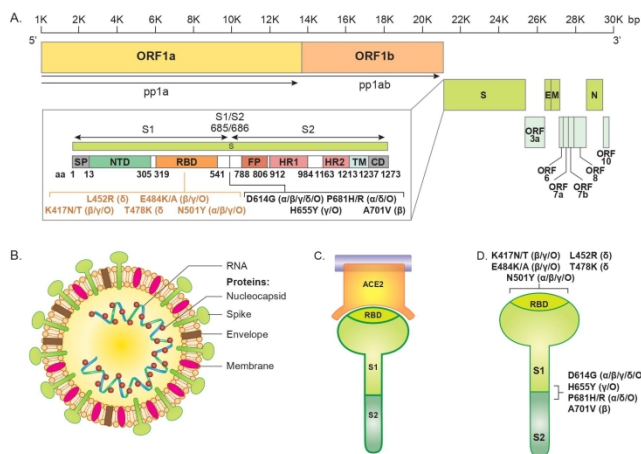

Figure 1: Genome and structure of SARS-CoV-2.

210x297mm (300 x 300 DPI)

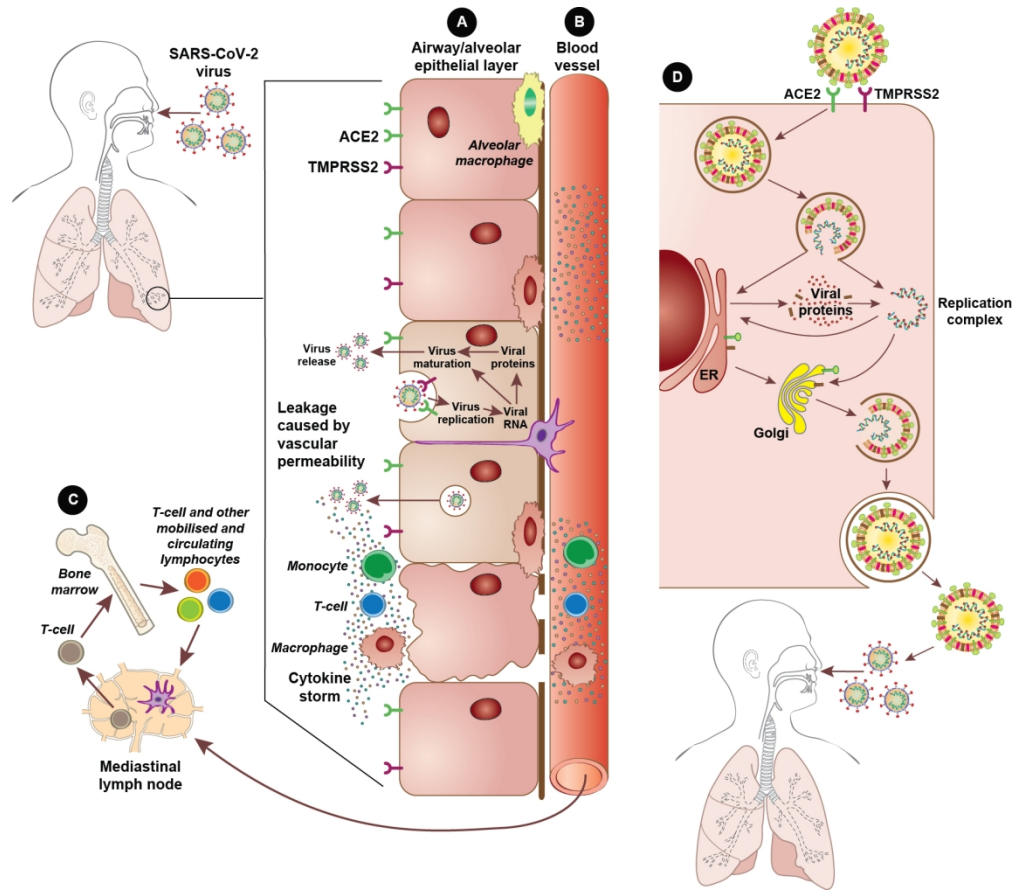

Figure 2: Viral entry and host response.

153x135mm (300 x 300 DPI)

| Variants of concern             |                                 |                                 |            |       |       |                          |                              |
|---------------------------------|---------------------------------|---------------------------------|------------|-------|-------|--------------------------|------------------------------|
| WHO nomenclature or designation | Pango Lineage                   | S protein mutations of interest |            |       |       |                          | First detected samples *     |
| Alpha                           | B.1.1.7                         | N501Y                           | D614G      | P681H |       |                          | UK, Sept 2020                |
| Beta                            | B.1.351                         | N501Y                           | D614G      | E484K | K417N | A701V                    | South Africa, May 2020       |
| Gamma                           | P.1                             | N501Y                           | D614G      | E484K | K417T | H655Y                    | Brazil, Nov 2020             |
| Delta                           | B.1.617.2                       | L452R                           | D614G      | P681R | T478K |                          | India, Oct 2020              |
| Omicron                         | B.1.1.529                       | N501Y                           | D614G      | E484A | P681H | K417N                    | H655Y                        |
|                                 |                                 | A67V                            | Δ69-70     | T95I  | G142D | Δ143-145                 | N211I                        |
|                                 |                                 | Δ212                            | ins215EPE  | G339D | S371L | S373P                    | S375F                        |
|                                 |                                 | N440K                           | G446S      | S477N | T478K | Q493R                    | G496S                        |
|                                 |                                 | Q498R                           | Y505H      | T547K | N679K | N764K                    | D796Y                        |
|                                 |                                 | N856K                           | Q954H      | N969K | L981F |                          |                              |
| Variants of Interest            |                                 |                                 |            |       |       |                          |                              |
| WHO nomenclature or designation | Pango Lineage                   | S protein mutations of interest |            |       |       |                          | First detected samples *     |
| Lambda                          | C.37                            | L452Q                           | D614G      | F490S |       |                          | Peru, Dec 2020               |
| Mu                              | B.1.621                         | N501Y                           | D614G      | P681H | R346K | E484K                    | Columbia, Jan 2021           |
| Variants under monitoring       |                                 |                                 |            |       |       |                          |                              |
| Pango Lineage                   | S protein mutations of interest |                                 |            |       |       | First detected samples * |                              |
| B.1.1.318                       |                                 | D614G                           | P681H      | E484K |       |                          | Multiple countries, Jan 2021 |
| C.1.2                           |                                 | N501Y                           | D614G      | E484K | H655Y | N679K                    | Y449H                        |
| B.1.640                         |                                 | N501Y                           | D614G      | P681H | F490R | N394S                    | R346S                        |
|                                 |                                 | Y449N                           | 137-145del |       |       |                          |                              |

| Vaccine and vaccine type                         | Recommended dose and administration                                                                             | Study ref.                                                                                 | Study type                  | Study date and location(s)                                                           | N            | Vaccine effectiveness % (95% confidence interval) * |                                |                        |  |  |
|--------------------------------------------------|-----------------------------------------------------------------------------------------------------------------|--------------------------------------------------------------------------------------------|-----------------------------|--------------------------------------------------------------------------------------|--------------|-----------------------------------------------------|--------------------------------|------------------------|--|--|
|                                                  |                                                                                                                 |                                                                                            |                             |                                                                                      |              | Against                                             | One dose                       | Two doses              |  |  |
| Pfizer/BioNtech (BNT162b2) – mRNA.               | Two doses (30µg, 0.3ml each) intramuscularly (deltoid) with a recommended interval of 21-28 days between doses. | (156)                                                                                      | Randomised controlled trial | 27/7/2020 to 14/11/2020<br>US, Argentina, Brazil, South Africa, Germany, and Turkey. | 37,706       | Symptomatic infection                               |                                | 95% (90.3–97.6%)       |  |  |
|                                                  |                                                                                                                 | (241)                                                                                      | Observational               | 20/12/2020 to 1/2/2021<br>Israel.                                                    | 1,193,236    | Documented infection                                | 46% (40-51%)                   | 92% (88-95%)           |  |  |
|                                                  |                                                                                                                 |                                                                                            |                             |                                                                                      |              | Symptomatic infection                               | 57% (50-63%)                   | 94% (87-98%)           |  |  |
|                                                  |                                                                                                                 |                                                                                            |                             |                                                                                      |              | Hospitalisation                                     | 74% (56-86%)                   | 87% (55-100%)          |  |  |
|                                                  |                                                                                                                 |                                                                                            |                             |                                                                                      |              | Severe disease                                      | 62% (39-80%)                   | 92% (75-100%)          |  |  |
|                                                  |                                                                                                                 | (242)                                                                                      | Test-negative case-control  | 26/10/2020 to 16/5/2021<br>UK.                                                       | 19,109       | Infection with Alpha                                | 47.5% (41.6–52.8%)             | 93.7% (91.6–95.3%)     |  |  |
|                                                  |                                                                                                                 |                                                                                            |                             |                                                                                      |              | Infection with Delta                                | 35.6% (22.7–46.4%)             | 88.0% (85.3–90.1%)     |  |  |
|                                                  |                                                                                                                 | (243)                                                                                      | Test-negative case-control  | 1/2/2021 to 31/3/2021<br>Qatar.                                                      | 213,758      | Infection with Beta                                 |                                | 75.0% (70.5-78.9%)     |  |  |
|                                                  |                                                                                                                 |                                                                                            |                             |                                                                                      |              | Infection with Alpha or Beta                        |                                | 97.4% (92.2-99.5%)     |  |  |
|                                                  |                                                                                                                 | (244)                                                                                      | Test-negative case-control  | 14/12/2020 to 19/4/2021<br>Canada.                                                   | 324,033      | Symptomatic infection                               | 14-20 days: 48% (41-54%)       | ≥7 days: 91% (89-93%)  |  |  |
|                                                  |                                                                                                                 |                                                                                            |                             |                                                                                      |              |                                                     | ≥14 days: 60% (57-64%)         |                        |  |  |
|                                                  |                                                                                                                 |                                                                                            |                             |                                                                                      |              |                                                     | 35-41 days: 71% (63-78%)       |                        |  |  |
|                                                  |                                                                                                                 |                                                                                            |                             |                                                                                      |              | Hospital admission or death                         | 14-20 days: 62% (44-75%)       | ≥7 days: 98% (88-100%) |  |  |
|                                                  |                                                                                                                 |                                                                                            |                             |                                                                                      |              |                                                     | ≥14 days: 70% (60-77%)         |                        |  |  |
|                                                  |                                                                                                                 |                                                                                            |                             |                                                                                      |              |                                                     | ≥35 days: 91% (73-97%)         |                        |  |  |
|                                                  |                                                                                                                 | [NOTE: Participants in this study received an mRNA vaccine (either BNT162b2 or mRNA-1273)] |                             |                                                                                      |              |                                                     |                                |                        |  |  |
|                                                  |                                                                                                                 | (245)                                                                                      | Test-negative case-control  | 14/12/2020 to 3/8/2021<br>Canada.                                                    | 682,071      | Symptomatic infection - Alpha                       | ≥14 days: 66% (95% CI: 64-68%) | ≥7 days: 89% (86–91%)  |  |  |
|                                                  |                                                                                                                 |                                                                                            |                             |                                                                                      |              | Symptomatic infection - Beta or Gamma variants      | ≥14 days: 60% (52-67%)         | ≥7 days: 84% (69–92%)  |  |  |
|                                                  |                                                                                                                 |                                                                                            |                             |                                                                                      |              | Symptomatic infection - Delta                       | ≥14 days: 56% (45-64%)         | ≥7 days: 87% (64–95%)  |  |  |
|                                                  |                                                                                                                 |                                                                                            |                             |                                                                                      |              | Against hospitalisation or death - Alpha            | ≥14 days: 80% (78-82%)         | ≥7 days: 95% (92-97%)  |  |  |
| Against hospitalisation or death - Beta or Gamma | ≥14 days: 77% (69-83%)                                                                                          |                                                                                            |                             |                                                                                      |              | ≥7 days: 95% (81-99%)                               |                                |                        |  |  |
| Against hospitalisation or death - Delta         | ≥14 days: 78% (65-86%)                                                                                          |                                                                                            |                             |                                                                                      |              |                                                     |                                |                        |  |  |
| (246)                                            | Retrospective case-control                                                                                      | January to July 2021<br>US.                                                                | 119,463                     | Infection                                                                            |              | ≥14 days: 86% (81-90.6%)                            |                                |                        |  |  |
|                                                  |                                                                                                                 |                                                                                            |                             | Hospitalisation                                                                      |              | ≥14 days: 85% (73-93%)                              |                                |                        |  |  |
|                                                  |                                                                                                                 |                                                                                            |                             | Admission to an ICU                                                                  |              | ≥14 days: 87% (46-98.6%)                            |                                |                        |  |  |
| (133)                                            | Test-negative observational                                                                                     | 1/4/2021 to 6/6/2021<br>Scotland.                                                          | 400,827                     | Infection - Alpha                                                                    |              | 92% (90–93%)                                        |                                |                        |  |  |
|                                                  |                                                                                                                 |                                                                                            |                             | Infection - Delta                                                                    |              | 79% (75-82%)                                        |                                |                        |  |  |
| (247)                                            |                                                                                                                 |                                                                                            | 14,019                      | Hospitalisation - Alpha                                                              | 83% (62-93%) | 95% (78-99%)                                        |                                |                        |  |  |

|  |       |  |                            |                                  |                                     |                                 |                               |                              |
|--|-------|--|----------------------------|----------------------------------|-------------------------------------|---------------------------------|-------------------------------|------------------------------|
|  |       |  | Test-negative case-control | 12/4/2021 to 4/6/2021 England.   |                                     | Hospitalisation - Delta         | 94% (46-99%)                  | 96% (86-99%)                 |
|  | (248) |  | Test-negative case-control | 8/12/2020 to 19/2/2021. England. | 156,930                             | Infection                       |                               | 10-13 days: 70% (59-78%)     |
|  |       |  |                            |                                  |                                     |                                 |                               | ≥14 days: 89% (85-93%)       |
|  |       |  |                            |                                  |                                     |                                 |                               | 28-34 days: 61% (51-69%)     |
|  | (249) |  | Test-negative case-control | 4/4/2021 to 1/5/2021 Canada.     | 16,993                              | Infection                       | 0-13 days: 14% (0-26%)        |                              |
|  |       |  |                            |                                  |                                     |                                 | 14-20 days: 43% (30-53%)      |                              |
|  |       |  |                            |                                  |                                     |                                 | 35-41 days: 75% (63-83%)      |                              |
|  |       |  |                            |                                  |                                     | Infection                       |                               | ≥21 days: 65% (58-71%)       |
|  |       |  |                            |                                  |                                     | Infection - non-VOC             |                               | 72% (58-81%)                 |
|  |       |  |                            |                                  |                                     | Infection - Alpha               |                               | 67% (57-75%)                 |
|  |       |  |                            |                                  |                                     | Infection - Gamma               |                               | 61% (45-72%)                 |
|  | (250) |  | Test-negative case-control | 17/1/2021 to 5/6/2021 Canada.    | 5,8476                              | Infection                       | ≥14 days: 70.3% (68.1-72.4%)  | ≥7 days: 85.5% (80.4-89.3%)  |
|  | (251) |  | Case-control               | 14/2/2021 to 3/5/2021 France.    | 67,760                              | Infection                       |                               | ≥7 days: 88% (81-92%)        |
|  |       |  |                            |                                  |                                     | Infection - Alpha               |                               | ≥7 days: 86% (81-90%)        |
|  |       |  |                            |                                  |                                     | Infection - Beta/Gamma          |                               | ≥7 days: 77% (63-86%)        |
|  | (252) |  | Test-negative case-control | 23/3/2021 to 7/9/2021 Qatar.     | 1 dose: 906,078<br>2 doses: 877,354 | Infection – Delta               | 65.5% (40.9-79.9%)            | ≥14 days: 59.6% (50.7-66.9%) |
|  |       |  |                            |                                  |                                     | Severe disease or death - Delta |                               | 97.3% (84.4-99.5%)           |
|  | (192) |  | Test-negative case-control | 1/1/2021 to 5/9/2021 Qatar.      | 1 dose: 947,035<br>2 doses: 907,763 | Symptomatic infection           | 0-13 days: -5.5% (-12.9-1.4%) |                              |
|  |       |  |                            |                                  |                                     |                                 | ≥14 days: 47.9% (43.6-51.9%)  |                              |
|  |       |  |                            |                                  |                                     |                                 | 1 month: 81.5% (79.9-83.0%)   |                              |
|  |       |  |                            |                                  |                                     |                                 | 2 months: 72.5% (69.6-75.1%)  |                              |
|  |       |  |                            |                                  |                                     |                                 | 3 months: 70.6% (66.4-74.3%)  |                              |
|  |       |  |                            |                                  |                                     |                                 | 4 months: 57.0% (48.6-64.0%)  |                              |
|  |       |  |                            |                                  |                                     |                                 | 5 months: 12.0% (-6.1-27.1%)  |                              |
|  |       |  |                            |                                  |                                     |                                 | 6 months: 12.8% (-9.1-30.3%)  |                              |
|  |       |  |                            |                                  |                                     | ≥7 months: 27.8% (-1.4-48.7%)   |                               |                              |
|  |       |  |                            |                                  |                                     | Hospitalisation and death       | 0-13 days: 7.5% (-11.9-23.6%) |                              |
|  |       |  |                            |                                  |                                     |                                 | ≥14 days: 65.0% (55.0-72.8%)  |                              |
|  |       |  |                            |                                  |                                     |                                 | 1 month: 95.9% (93.6-97.3%)   |                              |
|  |       |  |                            |                                  |                                     |                                 | 2 months: 96.3% (92.9-98.0%)  |                              |
|  |       |  |                            |                                  |                                     |                                 | 3 months: 93.4% (87.5-96.5%)  |                              |
|  |       |  |                            |                                  |                                     |                                 | 4 months: 80.8% (56.9-91.4%)  |                              |
|  |       |  |                            |                                  |                                     |                                 | 6 months: 81.8% (18.5-95.9%)  |                              |
|  |       |  |                            |                                  |                                     | ≥7 months: 44.1% (-86.5-83.3%)  |                               |                              |
|  | (253) |  | Prospective cohort         | 7/12/2020 to 5/2/2021            | 23,324                              | Infection                       | ≥21 days: 70% (55-85%)        | ≥7 days: 85% (74-96%)        |

1  
2  
3  
4  
5  
6  
7  
8  
9  
10  
11  
12  
13  
14  
15  
16  
17  
18  
19  
20  
21  
22  
23  
24  
25  
26  
27  
28  
29  
30  
31  
32  
33  
34  
35  
36  
37  
38  
39  
40  
41  
42  
43  
44  
45  
46



|    |       |                             |                                                                               |                                  |                                                                                                                       |                                                                                                  |                              |
|----|-------|-----------------------------|-------------------------------------------------------------------------------|----------------------------------|-----------------------------------------------------------------------------------------------------------------------|--------------------------------------------------------------------------------------------------|------------------------------|
|    |       |                             | UK.                                                                           |                                  |                                                                                                                       |                                                                                                  |                              |
| 1  | (254) | Observational               | 24/1/2021 to 3/4/2021 Israel.                                                 | 186,109                          | Infection                                                                                                             |                                                                                                  | ≥7 days: 95.3% (94.9-95.7%)  |
| 2  |       |                             |                                                                               |                                  | Asymptomatic infection                                                                                                |                                                                                                  | ≥7 days: 91.5% (90.7-92.2%)  |
| 3  |       |                             |                                                                               |                                  | Symptomatic infection                                                                                                 |                                                                                                  | ≥7 days: 97.0% (96.7-97.2%)  |
| 4  |       |                             |                                                                               |                                  | Hospitalisation                                                                                                       |                                                                                                  | ≥7 days: 97.2% (96.8-97.5%)  |
| 5  |       |                             |                                                                               |                                  | Severe or critical infection                                                                                          |                                                                                                  | ≥7 days: 97.5% (97.1-97.8%)  |
| 6  |       |                             |                                                                               |                                  | Death                                                                                                                 |                                                                                                  | ≥7 days: 96.7% (96.0-97.3%)  |
| 7  |       |                             |                                                                               |                                  |                                                                                                                       |                                                                                                  |                              |
| 8  | (255) | Observational               | 1/3/2021 to 1/8/2021 US.                                                      | 10,428, 783                      | Infection – Pre-Delta period                                                                                          |                                                                                                  | ≥14 days: 74.2% (68.9-78.7%) |
| 9  |       |                             |                                                                               |                                  | Infection – Intermediate period                                                                                       |                                                                                                  | ≥14 days: 66.5% (58.3-73.1%) |
| 10 |       |                             |                                                                               |                                  | Infection – Delta                                                                                                     |                                                                                                  | ≥14 days: 52.4% (48.0-56.4%) |
| 11 | (256) | Observational               | 14/12/2020 to 14/8/2021 US.                                                   | Delta: 2,840<br>Pre-Delta: 7,012 | Infection – Delta                                                                                                     |                                                                                                  | 14–119 days: 85% (68-93%)    |
| 12 |       |                             |                                                                               |                                  |                                                                                                                       |                                                                                                  | 120–149 days: 81% (34-95%)   |
| 13 |       |                             |                                                                               |                                  |                                                                                                                       |                                                                                                  | ≥150 days: 73% (49-86%)      |
| 14 |       |                             |                                                                               |                                  | Infection – Pre-Delta                                                                                                 |                                                                                                  | 91% (81-96%)                 |
| 15 |       |                             |                                                                               |                                  |                                                                                                                       |                                                                                                  |                              |
| 16 |       |                             |                                                                               |                                  | [NOTE only 65% of participants in this study received BNT162b2 (33% received mRNA-1273, and 2% received Ad26.COV2.S)] |                                                                                                  |                              |
| 17 | (257) | Observational               | 15/1/2021 to 16/4/2021 France.                                                | 378                              | Infection – Beta                                                                                                      |                                                                                                  | ≥7 days: 49% (14-69%)        |
| 18 |       |                             |                                                                               |                                  | Severe disease                                                                                                        |                                                                                                  | ≥7 days: 86% (67-94%)        |
| 19 |       |                             |                                                                               |                                  |                                                                                                                       |                                                                                                  |                              |
| 20 | (258) | Observational               | 1/12/2020 to 1/8/2021 UK.                                                     | 384,543                          | Infection – Alpha                                                                                                     | ≥21 days: 59% (52-65%)                                                                           |                              |
| 21 |       |                             |                                                                               |                                  | Infection – Delta                                                                                                     | ≥21 days: 57% (50-63%)                                                                           |                              |
| 22 |       |                             |                                                                               |                                  | Infection – Alpha                                                                                                     |                                                                                                  | 0-13 days: 77% (66-84%)      |
| 23 |       |                             |                                                                               |                                  |                                                                                                                       |                                                                                                  | ≥14 days: 78% (68-84%)       |
| 24 |       |                             |                                                                               |                                  | Infection – Delta                                                                                                     |                                                                                                  | 0-13 days: 82% (75-87%)      |
| 25 |       |                             |                                                                               |                                  |                                                                                                                       |                                                                                                  | ≥14 days: 80% (77-83%)       |
| 26 |       |                             |                                                                               |                                  |                                                                                                                       |                                                                                                  |                              |
| 27 | (259) | Observational               | April to May 2021. Canada                                                     | 224                              | Infection                                                                                                             |                                                                                                  | 66.2% (2.3-88.3%)            |
| 28 |       |                             |                                                                               |                                  | Symptomatic infection                                                                                                 |                                                                                                  | 25.6% (-157.8-78.5%)         |
| 29 |       |                             |                                                                               |                                  |                                                                                                                       |                                                                                                  |                              |
| 30 | (260) | Retrospective cohort        | 27/12/2020 to 24/3/2021 Italy.                                                | 6,423                            | Infection                                                                                                             | 0-14 days: 47.3% (24.7-63.1%)<br>14-21 days: 84.1% (39.7-95.8%)<br>≥21 days: 85.4% (-35.3-98.4%) | ≥7 days: 95.1% (62.4-99.4%)  |
| 31 |       |                             |                                                                               |                                  | Symptomatic infection                                                                                                 | 0-14 days: 39.9% (9.1-60.3%)<br>14-21 days: 83.3% (14.8-96.7%)<br>≥21 days: 65.9% (-171-95.7%)   | ≥7 days: 93.7% (50.8-99.2%)  |
| 32 |       |                             |                                                                               |                                  |                                                                                                                       |                                                                                                  |                              |
| 33 |       |                             |                                                                               |                                  |                                                                                                                       |                                                                                                  |                              |
| 34 |       |                             |                                                                               |                                  |                                                                                                                       |                                                                                                  |                              |
| 35 | (261) | Randomised controlled trial | 27//7/2020 to 29/10/2020 US, Argentina, Brazil, South Africa, Germany, Turkey | 44,165                           | Infection (without evidence of prior infection)                                                                       |                                                                                                  | ≥7 days: 91.3% (89-93.2%)    |
| 36 |       |                             |                                                                               |                                  | Infection (with evidence of previous infection)                                                                       |                                                                                                  | ≥7 days: 91.1% (88.8-93.0%)  |
| 37 |       |                             |                                                                               |                                  | Infection                                                                                                             | <11 days: 18.2% (-26.1-47.3%)                                                                    | <7 days: 91.5% (72.9-98.3%)  |
| 38 |       |                             |                                                                               |                                  |                                                                                                                       | ≥11 days to second dose: 91.7% (79.6-97.4%)                                                      | ≥7 days: 91.2% (88.9-93.0%)  |
| 39 |       |                             |                                                                               |                                  |                                                                                                                       |                                                                                                  |                              |
| 40 |       |                             |                                                                               |                                  |                                                                                                                       |                                                                                                  |                              |
| 41 |       |                             |                                                                               |                                  |                                                                                                                       |                                                                                                  |                              |
| 42 |       |                             |                                                                               |                                  |                                                                                                                       |                                                                                                  |                              |
| 43 |       |                             |                                                                               |                                  |                                                                                                                       |                                                                                                  |                              |
| 44 |       |                             |                                                                               |                                  |                                                                                                                       |                                                                                                  |                              |
| 45 |       |                             |                                                                               |                                  |                                                                                                                       |                                                                                                  |                              |
| 46 |       |                             |                                                                               |                                  |                                                                                                                       |                                                                                                  |                              |

|  |       |                      |                                  |         |                                                 |                                |                                            |                                                            |                                      |                                       |                                       |
|--|-------|----------------------|----------------------------------|---------|-------------------------------------------------|--------------------------------|--------------------------------------------|------------------------------------------------------------|--------------------------------------|---------------------------------------|---------------------------------------|
|  |       |                      |                                  |         |                                                 |                                | ≥7 days to <2 months: 96.2% (93.3-98.1%)   |                                                            |                                      |                                       |                                       |
|  |       |                      |                                  |         |                                                 |                                | ≥2 months to <4 months: 90.1% (86.6-92.9%) |                                                            |                                      |                                       |                                       |
|  |       |                      |                                  |         |                                                 |                                | ≥4 months: 83.7% (74.7-89.9%)              |                                                            |                                      |                                       |                                       |
|  | (262) | Retrospective cohort | 20/12/2020 to 25/2/2021 Israel.  | 6,710   | Symptomatic Infection                           | 7-21 days: 89% (83-94%)        | ≥7 days: 97% (94-99%)                      |                                                            |                                      |                                       |                                       |
|  |       |                      |                                  |         |                                                 |                                | ≥21 days: 98% (94-100%)                    |                                                            |                                      |                                       |                                       |
|  |       |                      |                                  |         | Asymptomatic Infection                          | 7-21 days: 36% (-51-69%)       | ≥7 days: 86% (69-93%)                      |                                                            |                                      |                                       |                                       |
|  |       |                      |                                  |         |                                                 |                                | ≥21 days: 94% (78-98%)                     |                                                            |                                      |                                       |                                       |
|  | (263) | Cohort               | 27/12/2020 to 28/2/2021 Sweden.  | 805,741 | Infection                                       | ≥14 days: 42% (14-63%)         | <7 days: 60% (27-81%)                      |                                                            |                                      |                                       |                                       |
|  |       |                      |                                  |         |                                                 |                                | ≥7 days: 86% (72-94%)                      |                                                            |                                      |                                       |                                       |
|  | (264) | Prospective cohort   | 27/12/2020 to 26/5/2021 Spain.   | 28,594  | Infection – Nursing home residents              | 12 days: 20% (19.76-20.3%)     | 90.89% (90.84-90.95%)                      |                                                            |                                      |                                       |                                       |
|  |       |                      |                                  |         |                                                 |                                |                                            | 40.28% (40.17-40.39)                                       |                                      |                                       |                                       |
|  |       |                      |                                  |         |                                                 | 26,238                         | Infection – Nursing home staff             | 12 days: 20.27% (19.8-20.73%)                              | 85.02% (84.86-85.17%)                |                                       |                                       |
|  |       |                      |                                  |         |                                                 |                                |                                            | 26.49% (26.25-26.74%)                                      |                                      |                                       |                                       |
|  |       |                      |                                  |         |                                                 | 61,951                         | Infection – Healthcare workers             | 12 days: 15.44% (15.19-15.68%)                             | 94% (93.92-94.1%)                    |                                       |                                       |
|  |       |                      |                                  |         |                                                 |                                |                                            | 33.8% (33.66-33.92%)                                       |                                      |                                       |                                       |
|  |       |                      |                                  | 28,594  | Hospital admission - Nursing home residents     | 12 days: 67.59% (65.29-69.75%) | 95.06% (94.73-95.38%)                      |                                                            |                                      |                                       |                                       |
|  |       |                      |                                  |         |                                                 | 46.24% (45.62-46.86%)          |                                            |                                                            |                                      |                                       |                                       |
|  |       |                      |                                  |         | Death - Nursing home residents                  | 12 days: 43.95% (37.87-49.44%) | 96.73% (96.43-96.99)                       |                                                            |                                      |                                       |                                       |
|  |       |                      |                                  |         |                                                 | 51.71% (51.17-52.23%)          |                                            |                                                            |                                      |                                       |                                       |
|  | (265) | Cohort               | 27/12/2020 to 11/4/2021 Denmark. | 864,096 | Infection - Prioritised risk groups             | 0-14 days: -72% (-80- -64%)    | 0-7 days: 42% (33-50%)                     |                                                            |                                      |                                       |                                       |
|  |       |                      |                                  |         |                                                 |                                |                                            |                                                            | >14 days to second dose: 7% (-1-15%) | > 7 days: 82% (79-84%)                |                                       |
|  |       |                      |                                  |         |                                                 |                                |                                            | COVID-19-related hospitalisation - Prioritised risk groups | 0-14 days: 54% (44-62%)              | 0-7 days: 90% (80-95%)                |                                       |
|  |       |                      |                                  |         |                                                 |                                |                                            |                                                            |                                      | >14 days to second dose: 35% (18-49%) | >7 days: 93% (89-96%)                 |
|  |       |                      |                                  |         |                                                 |                                |                                            | COVID-19-related death - Prioritised risk groups           | 0-14 days: 76% (68-82%)              | >7 days: 94% (90-96%)                 |                                       |
|  |       |                      |                                  |         |                                                 |                                |                                            |                                                            |                                      |                                       | >14 to second dose days: 7% (-15-25%) |
|  | (266) | Case-control         | 27.1.2021 to 7/2/2021 Spain.     | 268     | Infection                                       | 52.6% (95%CI: 1.1-77.3)        |                                            |                                                            |                                      |                                       |                                       |
|  | (267) | Observational        | 15/12/2020 to 3/2/2021 England.  | 170,226 | Infection                                       | 21-27 days: 55.2% (40.8-66.8%) |                                            |                                                            |                                      |                                       |                                       |
|  |       |                      |                                  |         |                                                 |                                |                                            | Emergency hospital attendance                              | 21-27 days: 57.8% (30.8-74.5%)       |                                       |                                       |
|  |       |                      |                                  |         |                                                 |                                |                                            | Hospitalisation                                            | 21-27 days: 50.1% (19.9-69.5%)       |                                       |                                       |
|  | (268) | Cohort               | 27/12/2020 to 10/3/2021 Spain.   | 299,209 | Infection (without evidence of prior infection) | 0-14 days: 28.9% (26.9-31%)    |                                            |                                                            |                                      |                                       |                                       |
|  |       |                      |                                  |         |                                                 |                                |                                            |                                                            |                                      | 15-21 days: 51.9% (50.7-53.1%)        |                                       |
|  |       |                      |                                  |         |                                                 |                                |                                            |                                                            |                                      | 22-28 days: 62.9% (61.9-64%)          |                                       |
|  |       |                      |                                  |         |                                                 |                                |                                            |                                                            |                                      | ≥29 days: 81.8% (81.0-82.7%)          |                                       |
|  |       |                      |                                  |         |                                                 |                                |                                            |                                                            |                                      | 0-14 days: 9.6% (-6.9-26.8%)          |                                       |

|  |       |                                   |                                      |                                             |                                                                                              |                                                               |                                |
|--|-------|-----------------------------------|--------------------------------------|---------------------------------------------|----------------------------------------------------------------------------------------------|---------------------------------------------------------------|--------------------------------|
|  |       |                                   |                                      |                                             | Infection (with evidence of prior infection)                                                 | 15-21 days: 25.5% (15.1-36.6%)                                |                                |
|  |       |                                   |                                      |                                             |                                                                                              | 22-28 days: 34.6% (25.7-44.1%)                                |                                |
|  |       |                                   |                                      |                                             |                                                                                              | ≥29 days: 56.8% (47.1-67.7%)                                  |                                |
|  | (269) | Observational                     | 1/12/2020 to 8/5/2021 UK.            | 383,812                                     | Infection                                                                                    | 8-20 days after either dose: 56% (51-61%)                     |                                |
|  |       |                                   |                                      |                                             |                                                                                              | ≥21 days: 64% (59-68%)                                        | ≥21 days: 80% (74-84%)         |
|  |       |                                   |                                      |                                             | [NOTE: Both BNT162b2 and AZD1222 vaccines were included in this study]                       |                                                               |                                |
|  | (270) | Cohort                            | 19/12/2020 to 14/3/2021 Israel.      | 9,347                                       | Infection                                                                                    | 4-10 days: 28% (-18-57%)                                      | ≥11 days: 65% (45-79%)         |
|  |       |                                   |                                      |                                             |                                                                                              | ≥11 days after first, ≤10 days after second: 55% (32-70%)     |                                |
|  |       |                                   |                                      |                                             | Symptomatic infection                                                                        | 4-10 days: 21% (-32-41%)                                      | ≥11 days: 90% (84-94%)         |
|  |       |                                   |                                      |                                             |                                                                                              | ≥11 days after first, ≤10 days after second: 80% (69-87%)     |                                |
|  | (271) | Prospective cohort                | 8/12/2020 to 15/3/2021 England.      | 10,412                                      | Infection                                                                                    | 0-6 days: 36% (-6-62%)                                        |                                |
|  |       |                                   |                                      |                                             |                                                                                              | 7-13 days: 17% (-28-46%)                                      |                                |
|  |       |                                   |                                      |                                             |                                                                                              | 14-20 days: 4% (-60-43%)                                      |                                |
|  |       |                                   |                                      |                                             |                                                                                              | 21-27 days: 8% (-59-47%)                                      |                                |
|  |       |                                   |                                      |                                             |                                                                                              | 28-34 days: 56% (19-76%)                                      |                                |
|  |       |                                   |                                      |                                             |                                                                                              | 35-48 days: 62% (23-81%)                                      |                                |
|  |       |                                   |                                      |                                             |                                                                                              | ≥49 days: 51% (-17-80%)                                       |                                |
|  |       |                                   |                                      |                                             | [NOTE: Both BNT162b2 and AZD1222 vaccines were included in this study]                       |                                                               |                                |
|  | (272) | Retrospective cohort              | 1/1/2021 to 31/3/2021 US.            | 44,498                                      | Infection                                                                                    | >14 days after first, ≤14 days after second: 78.1% (71.1-82%) |                                |
|  |       |                                   |                                      |                                             |                                                                                              |                                                               | >14 days: 96.8% (95.3-97.8%)   |
|  | (273) | Prospective cohort                | 14/12/2020 to 10/4/2021 US.          | 3,975                                       | Infection                                                                                    | ≥14 days after first, <14 days after second: 80% (60-90%)     |                                |
|  |       |                                   |                                      |                                             |                                                                                              |                                                               | ≥14 days: 93% (78-98%)         |
|  | (274) | Randomised controlled trial       | 15/10/2020 to 12/1/2021 US.          | 2,260                                       | Infection - Adolescents (12-15 years of age) - (without evidence of prior infection)         |                                                               | ≥7 days: 100% (75.3-100%)      |
|  |       |                                   |                                      |                                             | Infection - Adolescents (12-15 years of age) - (with or without evidence of prior infection) |                                                               | ≥7 days: 100% (78.1-100%)      |
|  | (275) | Retrospective cohort              | 19/7/2021 to 13/11/2021 South Korea. | 444,313                                     | Infection – Adolescents (16-18 years of age)                                                 | ≥14 days: 91.1% (89.6-92.5%)                                  | ≥14 days: 99.1% (98.5-99.5%)   |
|  | (276) | Prospective cohort                | 25/7/2021 to 4/12/2021 US.           | 243                                         | Infection - Adolescents (12-17 years of age)                                                 |                                                               | ≥14 days: 92% (79-97%)         |
|  | (277) | Retrospective longitudinal cohort | 21/12/2020 to 6/2/2021 Israel.       | 5,439,734 first dose, 5,112,516 second dose | Infection                                                                                    | 14-20 days: 54.3% (50.6-57.8%)                                | 8-14 days: 89.9% (88.6-91.1%)  |
|  |       |                                   |                                      |                                             | Symptomatic infection                                                                        | 14-20 days: 58.3% (54.7-61.6%)                                | 8-14 days: 93.6% (92.7-94.3%)  |
|  |       |                                   |                                      |                                             | Hospitalisation                                                                              | 14-20 days: 74.5% (69.1-79%)                                  | 8-14 days: 93.8% (91.9-95.2%)  |
|  |       |                                   |                                      |                                             | Severe/Critical disease                                                                      | 14-20 days: 77.3% (71.2-82.1%)                                | 8-14 days: 94.4% (92.6-95.8%)  |
|  |       |                                   |                                      |                                             | Death                                                                                        | 14-20 days: 71.7% (64.1-77.7%)                                | 8-14 days: 91.3% (87.4-94.0%)  |
|  |       |                                   |                                      |                                             | Infection                                                                                    |                                                               | 15-21 days: 96.8% (96.1-97.4%) |

|  |       |                            |                                                                                                                 |           |                                                                                                  |                              |                                |
|--|-------|----------------------------|-----------------------------------------------------------------------------------------------------------------|-----------|--------------------------------------------------------------------------------------------------|------------------------------|--------------------------------|
|  |       |                            |                                                                                                                 |           | Symptomatic infection                                                                            |                              | 15-21 days: 98.1% (97.7-98.5%) |
|  |       |                            |                                                                                                                 |           | Hospitalisation                                                                                  |                              | 15-21 days: 98% (97.1-98.6%)   |
|  |       |                            |                                                                                                                 |           | Severe/Critical disease                                                                          |                              | 15-21 days: 98.6% (97.8-99.1%) |
|  |       |                            |                                                                                                                 |           | Death                                                                                            |                              | 15-21 days: 97.7% (95.9-98.7%) |
|  |       |                            |                                                                                                                 |           | Infection                                                                                        |                              | 22-28 days: 97.3% (96.7-97.8%) |
|  |       |                            |                                                                                                                 |           | Symptomatic infection                                                                            |                              | 22-28 days: 97.9% (97.4-98.3%) |
|  |       |                            |                                                                                                                 |           | Hospitalisation                                                                                  |                              | 22-28 days: 99% (98.4-99.3%)   |
|  |       |                            |                                                                                                                 |           | Severe/Critical disease                                                                          |                              | 22-28 days: 99.2% (98.6-99.5%) |
|  |       |                            |                                                                                                                 |           | Death                                                                                            |                              | 22-28 days: 98.6% (97-99.3%)   |
|  | (278) | Test-negative case-control | January to March 2021 US.                                                                                       | 1,843     | Infection                                                                                        | ≥14 days: 81.7% (74.3-86.9%) | ≤2 days: 81.7% (74.3-86.9%)    |
|  |       |                            |                                                                                                                 |           |                                                                                                  |                              | 3-6 days: 81.7% (74.3-86.9%)   |
|  |       |                            |                                                                                                                 |           |                                                                                                  |                              | ≥7 days: 93.5% (86.5-96.9%)    |
|  |       |                            |                                                                                                                 |           | [NOTE: 76% of case-patients and 78% of controls received BNT162b2, remainder received mRNA-1273] |                              |                                |
|  | (279) | Prospective cohort         | January to April 2021 Spain.                                                                                    | 20,961    | Infection                                                                                        | 21% (3-36%)                  | 65% (56-73%)                   |
|  |       |                            |                                                                                                                 |           | Symptomatic infection                                                                            | 30% (10-45%)                 | 82% (73-88%)                   |
|  |       |                            |                                                                                                                 |           | Symptomatic infection – 18-59 years old                                                          | 50% (12-72%)                 | 85% (74-91%)                   |
|  |       |                            |                                                                                                                 |           | Symptomatic infection - ≥60 years old                                                            | 20% (-7-40%)                 | 76% (55-87%)                   |
|  |       |                            |                                                                                                                 |           | Hospitalisation                                                                                  | 65% (25-83%)                 | 94% (60-99%)                   |
|  | (280) | Prospective cohort         | 8/10/2020 to 22/2/2021 Scotland.                                                                                | 409,588   | Hospitalisation                                                                                  | 0-6 days: 86% (81-90%)       |                                |
|  |       |                            |                                                                                                                 |           |                                                                                                  | 7-13 days: 53% (45-59%)      |                                |
|  |       |                            |                                                                                                                 |           |                                                                                                  | 14-20 days: 69% (62-75%)     |                                |
|  |       |                            |                                                                                                                 |           |                                                                                                  | 21-27 days: 78% (71-83%)     |                                |
|  |       |                            |                                                                                                                 |           |                                                                                                  | 28-34 days: 91% (85-94%)     |                                |
|  |       |                            |                                                                                                                 |           |                                                                                                  | 35-41 days: 78% (69-85%)     |                                |
|  |       |                            |                                                                                                                 |           |                                                                                                  | ≥42 days: 77% (68-83%)       |                                |
|  | (281) | Test-negative case-control | 27/12/2020 to 30/6/2021 Belgium, Croatia, Czechia, France, Greece, Ireland, Luxembourg, Malta, Portugal, Spain. | 1,893     | Infection                                                                                        | ≥14 days: 76% (61-86%)       | ≥14 days: 94% (88-97%)         |
|  | (282) | Prospective cohort         | 1/5/2021 to 3/9/2021 US.                                                                                        | 8,690,825 | Infection - 18-49 years old                                                                      |                              | ≥14 days: 93.3% (92.2-94.4%)   |
|  |       |                            |                                                                                                                 |           | Infection - 50-64 years old                                                                      |                              | ≥14 days: 95.0% (94.0-96.0%)   |
|  |       |                            |                                                                                                                 |           | Infection - ≤65 years old                                                                        |                              | ≥14 days: 91.4% (90.0-92.8%)   |
|  |       |                            |                                                                                                                 |           | Hospitalisation - 18-49 years old                                                                |                              | ≥14 days: 96.1% (94.1-97.6%)   |
|  |       |                            |                                                                                                                 |           | Hospitalisation - 50-64 years old                                                                |                              | ≥14 days: 95.6% (94.2-96.7%)   |
|  |       |                            |                                                                                                                 |           | Hospitalisation - ≤65 years old                                                                  |                              | ≥14 days: 94.8% (94.0-95.5%)   |
|  | (283) |                            |                                                                                                                 | 1,222     | Hospitalisation 12-18 years old                                                                  | 97% (86-100%)                | ≥14 days: 94% (90-96%)         |

|                                                                                                      |                                                                                                       |                             |                             |                                      |                                        |                                                              |                    |                          |
|------------------------------------------------------------------------------------------------------|-------------------------------------------------------------------------------------------------------|-----------------------------|-----------------------------|--------------------------------------|----------------------------------------|--------------------------------------------------------------|--------------------|--------------------------|
|                                                                                                      |                                                                                                       |                             | Test-negative case-control  | 1/7/2021 to 25/10/2021 US.           |                                        | ICU admission – 12-18 years old                              |                    | ≥14 days: 98% (93-99%)   |
|                                                                                                      |                                                                                                       |                             |                             |                                      |                                        | Life support – 12-18 years old                               |                    | ≥14 days: 98% (92-100%)  |
|                                                                                                      |                                                                                                       | (284)                       | Test-negative case-control  | 1/7/2021 to 9/12/2021 US.            | 283                                    | COVID-19 multisystem inflammatory syndrome – 12-18 years old |                    | ≥14 days: 92% (77-97%)   |
|                                                                                                      |                                                                                                       |                             |                             |                                      |                                        |                                                              |                    |                          |
| <b>Oxford University/ AstraZeneca (AZD1222)</b> - Non-replicating adenovirus viral vector (ChAdOx1). | Two doses (0.5ml each) intramuscularly (deltoid) with a recommended interval window of 8 to 12 weeks. | (242)                       | Test-negative case-control  | 26/10/2020 to 16/5/2021 UK.          | 19,109                                 | Infection - Alpha                                            | 48.7% (45.2–51.9%) | 74.5% (68.4–79.4%)       |
|                                                                                                      |                                                                                                       |                             |                             |                                      |                                        | Infection - Delta                                            | 30.0% (24.3–35.3%) | 67.0% (61.3–71.8%)       |
|                                                                                                      |                                                                                                       | (245)                       | Test-negative case-control  | 14/12/2020 to 3/8/2021 Canada.       | 682,071                                | Symptomatic infection - Alpha                                | 64% (60-68%)       |                          |
|                                                                                                      |                                                                                                       |                             |                             |                                      |                                        | Symptomatic infection – Beta or Gamma                        | 48% (28-63%)       |                          |
|                                                                                                      |                                                                                                       |                             |                             |                                      |                                        | Symptomatic infection - Delta                                | 67% (44-80%)       |                          |
|                                                                                                      |                                                                                                       |                             |                             |                                      |                                        | Hospitalisation or death - Alpha                             | 85% (81-88%)       |                          |
|                                                                                                      |                                                                                                       |                             |                             |                                      |                                        | Hospitalisation or death – Bet or Gamma                      | 83% (66-92%)       |                          |
|                                                                                                      |                                                                                                       |                             |                             |                                      |                                        | Hospitalisation or death - Delta                             | 88% (60-96%)       |                          |
|                                                                                                      |                                                                                                       | (133)                       | Test-negative observational | 1/4/2021 to 6/6/2021 Scotland.       | 462,755                                | Infection with Alpha variant                                 |                    | 73% (66-78%)             |
|                                                                                                      |                                                                                                       |                             |                             |                                      |                                        | Infection with Delta variant                                 |                    | 60% (53-66%)             |
|                                                                                                      |                                                                                                       | (285)                       | Randomised controlled trial | 1/10/2020 to 14/1/2021 UK.           | 8,534                                  | Symptomatic infection – Alpha                                |                    | 70.4% (43.6-84%%)        |
|                                                                                                      |                                                                                                       |                             |                             |                                      |                                        | Symptomatic infection – non-Alpha                            |                    | 81.5% (67.9-89.4%)       |
|                                                                                                      |                                                                                                       | (286)                       | Randomised controlled trial | 28/8/2020 to 5/3/2021 US.            | 32,449                                 | Symptomatic infection                                        |                    | 79%                      |
|                                                                                                      |                                                                                                       |                             |                             |                                      |                                        | Severe disease or hospitalisation                            |                    | 100%                     |
|                                                                                                      |                                                                                                       | (247)                       | Test-negative case-control  | 12/4/2021 to 4/6/2021 England.       | 14,019                                 | Hospitalisation – Alpha                                      | 76% (61-85%)       | 86% (53-96%)             |
|                                                                                                      |                                                                                                       |                             |                             |                                      |                                        | Hospitalisation – Delta                                      | 71% (51-83%)       | 92% (75-97%)             |
|                                                                                                      |                                                                                                       | (287)                       | Randomised controlled trial | 23/4/2020 to 4/11/2020 UK, Brazil.   | 11,636                                 | Infection                                                    |                    | 62.1% (41.0-75.7%)       |
|                                                                                                      |                                                                                                       | (288)                       | Randomised controlled trial | 24/6/2020 to 9/11/2020 South Africa. | 2,026                                  | Symptomatic infection                                        |                    | 21.9% (-49.9-59.8%)      |
|                                                                                                      |                                                                                                       |                             |                             |                                      |                                        | Symptomatic infection - Beta                                 |                    | 10.4% (-76.8-54.8%)      |
|                                                                                                      |                                                                                                       | (248)                       | Test-negative case-control  | 8/12/2020 to 19/2/2021. England.     | 156,930                                | Symptomatic infection                                        |                    | 28-34 days: 60% (41-73%) |
|                                                                                                      |                                                                                                       |                             |                             |                                      |                                        | ≥35 days: 73% (27-90%)                                       |                    |                          |
| (258)                                                                                                | Observational                                                                                         | 1/12/2020 to 1/8/2021 UK.   | 384,543                     | Infection - Alpha                    | ≥21 days: 63% (55–69%)                 | 0-13 days: 72% (50-84%)                                      |                    |                          |
|                                                                                                      |                                                                                                       |                             |                             |                                      |                                        | ≥14 days: 79% (56–90%)                                       |                    |                          |
|                                                                                                      |                                                                                                       |                             |                             | Infection Delta                      | ≥21 days: 46% (35–55%)                 | 0-13 days: 71% (64–77%)                                      |                    |                          |
|                                                                                                      |                                                                                                       |                             |                             |                                      |                                        | ≥14 days: 67% (62–71%)                                       |                    |                          |
| (289)                                                                                                | Test-negative case-control                                                                            | 1/3/2021 to 31/5/2021 India | 720                         | Infection                            | 49% (17-68%)                           | 54% (27-71%)                                                 |                    |                          |
|                                                                                                      |                                                                                                       |                             |                             | Symptomatic infection                | 58% (28-75%)                           | 64% (38-78%)                                                 |                    |                          |
|                                                                                                      |                                                                                                       |                             |                             | Moderately severe disease            | Any dosage >3 weeks ago: 95% (44-100%) |                                                              |                    |                          |

|    |  |       |                               |                                                  |         |                                                                           |                                           |                                 |
|----|--|-------|-------------------------------|--------------------------------------------------|---------|---------------------------------------------------------------------------|-------------------------------------------|---------------------------------|
| 1  |  | (269) | Observational                 | 1/12/2020 to 8/5/2021 UK.                        | 383,812 | Infection                                                                 | 8-20 days after either dose: 56% (51-61%) |                                 |
| 2  |  |       |                               |                                                  |         |                                                                           | ≥21 days: 64% (59-68%)                    | ≥21 days: 80% (74-84%)          |
| 3  |  |       |                               |                                                  |         | [NOTE: Both BNT162b2 and AZD1222 vaccines were included in this study]    |                                           |                                 |
| 4  |  | (290) | Randomised controlled trial   | 28/8/2020 to 15/1/2021 US, Chile, Peru.          | 32,451  | Symptomatic infection                                                     |                                           | ≥15 days: 74.0% (65.3-80.5%)    |
| 5  |  |       |                               |                                                  |         | Severe or critical infection                                              |                                           | ≥15 days: 100.0% (71.6-NE%)     |
| 6  |  |       |                               |                                                  |         | Emergency department visit                                                |                                           | ≥15 days: 94.8% (59.0-99.3%)    |
| 7  |  |       |                               |                                                  |         | Hospitalisation                                                           |                                           | ≥15 days: 94.2% (53.3-99.3%)    |
| 8  |  |       |                               |                                                  |         | ICU admission                                                             |                                           | ≥15 days: 100.0 (-1781.6-NE%)   |
| 9  |  | (291) | Clinical trial                | 23/6/2020 to 1/12/2020 Brazil.                   | 9433    | Infection – B.1.1.33                                                      |                                           | 88.2 (5.4, 98.5)                |
| 10 |  |       |                               |                                                  |         | Infection – B.1.1.28                                                      |                                           | 72.6% (46.4-86.0%)              |
| 11 |  |       |                               |                                                  |         | Infection – Zeta                                                          |                                           | 68.7% (54.9-78.3%)              |
| 12 |  |       |                               |                                                  |         | Infection – Gamma                                                         |                                           | 63.6% (-2.1-87.0%)              |
| 13 |  |       |                               |                                                  |         | Infection – Undetermined variant                                          |                                           | 56.6% (28.2-73.8%)              |
| 14 |  |       |                               |                                                  |         | Hospitalisation – Any variant                                             |                                           | 95% (61-99%)                    |
| 15 |  | (292) | Meta-analysis                 | 23/4/2020 to 6/12/2020 UK, Brazil, South Africa. | 17,178  | Asymptomatic infection                                                    |                                           | ≥14 days: 22.2% (-9.9-45%)      |
| 16 |  |       |                               |                                                  |         | Symptomatic infection                                                     |                                           | ≥14 days: 66.7% (57.4-74%)      |
| 17 |  |       |                               |                                                  |         | Asymptomatic infection - <6 weeks prime-boost interval (standard doses)   |                                           | ≥14 days: -11.8% (-189.5-56.8%) |
| 18 |  |       |                               |                                                  |         | Asymptomatic infection - 6-8 weeks prime-boost interval (standard doses)  |                                           | ≥14 days: -74.2% (-330.3-29.5%) |
| 19 |  |       |                               |                                                  |         | Asymptomatic infection – 9-11 weeks prime-boost interval (standard doses) |                                           | ≥14 days: 39.9% (-62.3-77.8%)   |
| 20 |  |       |                               |                                                  |         | Asymptomatic infection - ≥12 weeks prime-boost interval (standard doses)  |                                           | ≥14 days: 22.8% (-63.3-63.5%)   |
| 21 |  |       |                               |                                                  |         | Symptomatic infection - <6 weeks prime-boost interval (standard doses)    |                                           | ≥14 days: 55.1% (33-69.9%)      |
| 22 |  |       |                               |                                                  |         | Symptomatic infection - 6-8 weeks prime-boost interval (standard doses)   |                                           | ≥14 days: 59.9% (32-76.4%)      |
| 23 |  |       |                               |                                                  |         | Symptomatic infection – 9-11 weeks prime-boost interval (standard doses)  |                                           | ≥14 days: 63.7% (28-81.7%)      |
| 24 |  |       |                               |                                                  |         | Symptomatic infection - ≥12 weeks prime-boost interval (standard doses)   |                                           | ≥14 days: 81.3% (60.3-91.2%)    |
| 25 |  | (293) | Cross-sectional observational | 1/5/2021 to 31/5/2021 India.                     | 583     | Infection                                                                 | <14 days: 15% (-68-57%)                   | <14 days: 66% (34-81%)          |
| 26 |  |       |                               |                                                  |         |                                                                           | ≥14 days: 44% (7-66%)                     | ≥14 days: 83% (73-89%)          |
| 27 |  |       |                               |                                                  |         | Hospitalisation                                                           | <14 days: 43% (-68-81%)                   | <14 days: 83% (17-96%)          |
| 28 |  |       |                               |                                                  |         |                                                                           | ≥14 days: 76% (21-92%)                    | ≥14 days: 88% (55-97%)          |
| 29 |  |       |                               |                                                  |         | ICU admission or death                                                    | <14 days: 62% (-27-89%)                   | <14 days: 93% (35-99%)          |
| 30 |  |       |                               |                                                  |         |                                                                           | ≥14 days: 53% 9-29-83%)                   | ≥14 days: 93% (64-99%)          |
| 31 |  |       |                               |                                                  |         | [NOTE: Participants either received Covaxin or Covishield (AZD1222)]      |                                           |                                 |
| 32 |  | (279) | Prospective cohort            | January to April 2021 Spain.                     | 20,961  | Infection                                                                 | 44% (31-54%)                              |                                 |
| 33 |  |       |                               |                                                  |         | Symptomatic infection                                                     | 50% (37-61%)                              |                                 |
| 34 |  |       |                               |                                                  |         | Symptomatic infection – 18-59 years old                                   | 50% (34-62%)                              |                                 |

1  
2  
3  
4  
5  
6  
7  
8  
9  
10  
11  
12  
13  
14  
15  
16  
17  
18  
19  
20  
21  
22  
23  
24  
25  
26  
27  
28  
29  
30  
31  
32  
33  
34  
35  
36  
37  
38  
39  
40  
41  
42  
43  
44  
45  
46

|  |                                                                                                              |       |                             |                                                                                            |                                |                                                                                      |                              |                               |                                 |  |
|--|--------------------------------------------------------------------------------------------------------------|-------|-----------------------------|--------------------------------------------------------------------------------------------|--------------------------------|--------------------------------------------------------------------------------------|------------------------------|-------------------------------|---------------------------------|--|
|  |                                                                                                              |       |                             |                                                                                            |                                | Symptomatic infection - ≥60 years old                                                | 53% (19-72%)                 |                               |                                 |  |
|  |                                                                                                              |       |                             |                                                                                            |                                | Hospitalisation                                                                      | 92% (46-99%)                 |                               |                                 |  |
|  |                                                                                                              | (294) | Retrospective cohort        | 1/6/2020 to 31/5/2021 India.                                                               | 11,405                         | Infection (with evidence of prior infection)                                         |                              | ≥14 days: 91.1% (84.1-94.9%)  |                                 |  |
|  |                                                                                                              |       |                             |                                                                                            |                                | Infection (without evidence of prior infection)                                      |                              | ≥14 days: 31.8% (23.5-39.1%)  |                                 |  |
|  |                                                                                                              |       |                             |                                                                                            |                                | [NOTE: 5.77% of participants received Covaxin, 94.23% received Covishield (AZD1222)] |                              |                               |                                 |  |
|  |                                                                                                              | (280) | Prospective cohort          | 8/10/2020 to 22/2/2021 Scotland                                                            | 409,588                        | Hospitalisation                                                                      | 0-6 days: 72% (66-77%)       |                               |                                 |  |
|  |                                                                                                              |       |                             |                                                                                            |                                |                                                                                      | 7-13 days: 68% (61-73%)      |                               |                                 |  |
|  |                                                                                                              |       |                             |                                                                                            |                                |                                                                                      | 14-20 days: 73% (66-79%)     |                               |                                 |  |
|  |                                                                                                              |       |                             |                                                                                            |                                |                                                                                      | 21-27 days: 81% (72-87%)     |                               |                                 |  |
|  |                                                                                                              |       |                             |                                                                                            |                                |                                                                                      | 28-34 days: 88% (75-94%)     |                               |                                 |  |
|  |                                                                                                              |       |                             |                                                                                            |                                |                                                                                      | 35-41 days: 97% (63-100%)    |                               |                                 |  |
|  |                                                                                                              |       |                             |                                                                                            |                                | ≥42 days: 59% (-296-96%)                                                             |                              |                               |                                 |  |
|  |                                                                                                              | (295) | Cohort                      | 17/1/2021 to 11/5/2021 Brazil.                                                             | 313,328                        | Death                                                                                | ≥21 days: 94.4% (93.9-94.8%) | ≥21 days: 99.8 (99.6-99.9%)   |                                 |  |
|  |                                                                                                              |       |                             |                                                                                            |                                | Death – 75-79 years old                                                              | ≥21 days: 88% (85.8-90%)     |                               |                                 |  |
|  |                                                                                                              |       |                             |                                                                                            |                                | Death – 80-89 years old                                                              | ≥21 days: 96.8% (96.5-97.2%) |                               |                                 |  |
|  |                                                                                                              |       |                             |                                                                                            |                                | Death - ≥90 years old                                                                | ≥21 days: 99.2% (99.1-99.4%) |                               |                                 |  |
|  |                                                                                                              | (296) | Retrospective cohort        | 18/1/2021 to 30/6/2021 Brazil.                                                             | 60,577, 870                    | Infection                                                                            | ≥14 days: 34% (33.2-34.7%)   | 0-13 days: 56.9% (55.3-58.5%) |                                 |  |
|  |                                                                                                              |       |                             |                                                                                            |                                |                                                                                      |                              | ≥14 days: 70% (68.6-71.3%)    |                                 |  |
|  |                                                                                                              |       |                             |                                                                                            |                                | Hospitalisation                                                                      | ≥14 days: 52.2% (50.9-53.4%) | 0-13 days: 69.6% (67.2-71.8%) |                                 |  |
|  |                                                                                                              |       |                             |                                                                                            |                                |                                                                                      |                              | ≥14 days: 86.8% (85.2-88.2%)  |                                 |  |
|  |                                                                                                              |       |                             |                                                                                            |                                | ICU admission                                                                        | ≥14 days: 54% (51.8-56%)     | 0-13 days: 69.2% (65-72.8%)   |                                 |  |
|  |                                                                                                              |       |                             |                                                                                            |                                |                                                                                      |                              | ≥14 days: 88.1% (85.4-90.3%)  |                                 |  |
|  |                                                                                                              |       |                             |                                                                                            |                                | Death                                                                                | ≥14 days: 49.3% (47-51.5%)   | 0-13 days: 72.1% (69.1-74.9%) |                                 |  |
|  |                                                                                                              |       |                             |                                                                                            |                                |                                                                                      |                              | ≥14 days: 90.2% (88.3-91.8%)  |                                 |  |
|  |                                                                                                              |       |                             |                                                                                            |                                |                                                                                      |                              |                               |                                 |  |
|  | Johnson & Johnson (Ad26.COV2.S) - Recombinant, replication-incompetent adenovirus serotype 26 (Ad26) vector. | (172) | Randomised controlled trial | 21/9/2020 to 22/1/2021 Argentina, Brazil, Chile, Colombia, Mexico, Peru, South Africa, US. | 39,321                         | Moderate to severe-critical infection                                                | ≥14 days: 66.9% (59.0-73.4%) |                               |                                 |  |
|  |                                                                                                              |       |                             |                                                                                            |                                |                                                                                      | ≥28 days: 66.1% (55.0-74.8%) |                               |                                 |  |
|  |                                                                                                              |       |                             |                                                                                            |                                |                                                                                      | Severe-critical infection    | ≥14 days: 76.7% (54.6-89.1%)  |                                 |  |
|  |                                                                                                              |       |                             |                                                                                            |                                |                                                                                      |                              | ≥28 days: 85.4% (54.2-96.9%)  |                                 |  |
|  |                                                                                                              |       | (297)                       | Test-negative case-control                                                                 | 25/6/2021 to 30/9/2021 Brazil. | 11,817                                                                               | Symptomatic infection        | 14-27 days: 27.4% (8.7-42.7%) |                                 |  |
|  |                                                                                                              |       |                             |                                                                                            |                                |                                                                                      |                              | ≥28 days: 50.9% (35.5-63.0%)  |                                 |  |
|  |                                                                                                              |       |                             |                                                                                            |                                |                                                                                      |                              | Hospitalisation               | 14-27 days: 33.5% (-29.1-69.8%) |  |
|  |                                                                                                              |       |                             |                                                                                            |                                |                                                                                      |                              |                               | ≥28 days: 72.9% (35.1-91.1%)    |  |
|  |                                                                                                              |       |                             |                                                                                            |                                |                                                                                      |                              | Admission to an ICU           | 14-27 days: 56.0% (-52.8-93.1%) |  |
|  |                                                                                                              |       |                             |                                                                                            |                                |                                                                                      |                              |                               | ≥28 days: 92.5% (54.9-99.6%)    |  |
|  |                                                                                                              |       |                             |                                                                                            |                                | 14-27 days: 65.2% (-74.7-98.1%)                                                      |                              |                               |                                 |  |



|  |                                   |       |                            |                                |                                  |                                                                                                           |                                 |                              |
|--|-----------------------------------|-------|----------------------------|--------------------------------|----------------------------------|-----------------------------------------------------------------------------------------------------------|---------------------------------|------------------------------|
|  |                                   |       |                            |                                |                                  | Mechanical ventilation                                                                                    | ≥28 days: 88.7% (17.9-99.5%)    |                              |
|  |                                   |       |                            |                                |                                  | Death                                                                                                     | 14-27 days: 48.9% (-92.3-92.5%) |                              |
|  |                                   | (298) | Retrospective case-control | 27/2/2021 to 14/4/2021 US.     | 126,572                          | Symptomatic infection                                                                                     | ≥1 day: 50.6% (14.0-74.0%)      |                              |
|  |                                   |       |                            |                                |                                  |                                                                                                           | ≥8 days: 65.5% (23.3-87.5%)     |                              |
|  |                                   |       |                            |                                |                                  |                                                                                                           | ≥15 days: 76.7% (30.3-95.3%)    |                              |
|  |                                   | (299) | Test-negative case-control | 1/7/2021 to 31/7/2021 US.      | 1,000                            | Symptomatic infection                                                                                     | 51% (95% CI: -2-76%)            |                              |
|  |                                   | (256) | Observational              | 14/12/2020 to 14/8/2021 US.    | Delta: 2,840<br>Pre-Delta: 7,012 | Infection – Delta                                                                                         | 14–119 days: 85% (68-93%)       |                              |
|  |                                   |       |                            |                                |                                  |                                                                                                           | 120–149 days: 81% (34-95%)      |                              |
|  |                                   |       |                            |                                |                                  | Infection – Pre-Delta                                                                                     | ≥150 days: 73% (49-86%)         |                              |
|  |                                   |       |                            |                                |                                  |                                                                                                           | 91% (81-96%)                    |                              |
|  |                                   |       |                            |                                |                                  | [NOTE: 2% of study participants received Ad26.COV2.S (65% received BNT162b2, and 33% received mRNA-1273)] |                                 |                              |
|  |                                   | (300) | Cohort                     | March to July 2021 US.         | 1,914,670                        | Infection                                                                                                 | 79% (77-80%)                    |                              |
|  |                                   |       |                            |                                |                                  | Hospitalisation                                                                                           | 81% (79-84%)                    |                              |
|  |                                   | (301) | Retrospective cohort       | 27/2/2021 to 22/7/2021 US.     | 97,787                           | Infection                                                                                                 | ≥1 day: 73.6% (65.9-79.9%)      |                              |
|  |                                   |       |                            |                                |                                  |                                                                                                           | ≥8 days: 72.9% (64.2-79.9%)     |                              |
|  |                                   |       |                            |                                |                                  |                                                                                                           | ≥15 days: 74.2% (64.9-81.6%)    |                              |
|  |                                   | (282) | Prospective cohort         | 1/5/2021 to 3/9/2021 US.       | 8,690,825                        | Infection - 18-49 years old                                                                               |                                 | ≥14 days: 89% (86.5-91.5%)   |
|  |                                   |       |                            |                                |                                  | Infection - 50-64 years old                                                                               |                                 | ≥14 days: 86.1% (82.5-89.6%) |
|  |                                   |       |                            |                                |                                  | Infection - ≤65 years old                                                                                 |                                 | ≥14 days: 80.8% (75.2-86.5%) |
|  |                                   |       |                            |                                |                                  | Hospitalisation - 18-49 years old                                                                         |                                 | ≥14 days: 95.7% (91.1-98.3%) |
|  |                                   |       |                            |                                |                                  | Hospitalisation - 50-64 years old                                                                         |                                 | ≥14 days: 87.5% (82.4-91.4%) |
|  |                                   |       |                            |                                |                                  | Hospitalisation - ≤65 years old                                                                           |                                 | ≥14 days: 85.2% (81.1-88.6%) |
|  |                                   |       |                            |                                |                                  |                                                                                                           |                                 |                              |
|  | <b>Moderna (mRNA-1273) - mRNA</b> | (245) | Test-negative case-control | 14/12/2020 to 3/8/2021 Canada. | 682,071                          | Symptomatic infection – Alpha                                                                             | ≥14 days: 83% (80-86%)          | ≥7 days: 92% (86-96%)        |
|  |                                   |       |                            |                                |                                  | Symptomatic infection – Beta or Gamma                                                                     | ≥14 days: 77% (63-86%)          |                              |
|  |                                   |       |                            |                                |                                  | Symptomatic infection – Delta                                                                             | ≥14 days: 72% (57-82%)          |                              |
|  |                                   |       |                            |                                |                                  | Hospitalisation - Alpha                                                                                   | ≥14 days: 79% (74-83%)          | ≥7 days: 94% (89-97%)        |
|  |                                   |       |                            |                                |                                  | Hospitalisation – Beta or Gamma                                                                           | ≥14 days: 89% (73-95%)          |                              |
|  |                                   |       |                            |                                |                                  | Hospitalisation - Delta                                                                                   | ≥14 days: 96% (72-99%)          |                              |
|  |                                   | (246) | Retrospective case-control | January to July 2021 US.       | 60,083                           | Infection                                                                                                 |                                 | ≥14 days: 86% (81-90.6%)     |
|  |                                   |       |                            |                                |                                  | Hospitalisation                                                                                           |                                 | ≥14 days: 91.6% (81-97%)     |
|  |                                   |       |                            |                                |                                  | Admission to an ICU                                                                                       |                                 | ≥14 days: 93.3% (57-99.8%)   |
|  |                                   | (250) | Test-negative case-control | 17/1/2021 to 5/6/2021 Canada.  | 5,8476                           | Infection                                                                                                 | ≥14 days: 68.7% (59.5-75.9%)    | ≥7 days: 84.1% (34.9-96.1%)  |
|  |                                   | (252) | Test-negative case-control | 23/3/2021 to 7/9/2021          | 1 dose: 490,828                  | Infection - Delta                                                                                         | ≥14 days: 79.7% (60.8-89.5%)    | ≥14 days: 86.1% (78.0-91.3%) |



|  |       |                                   |                                      |                                            |                                                                                                           |                                                                                                                             |                                                                                    |
|--|-------|-----------------------------------|--------------------------------------|--------------------------------------------|-----------------------------------------------------------------------------------------------------------|-----------------------------------------------------------------------------------------------------------------------------|------------------------------------------------------------------------------------|
|  |       |                                   |                                      | Qatar.                                     | 2 doses:<br>409,041                                                                                       |                                                                                                                             |                                                                                    |
|  | (255) | Observational                     | 1/3/2021 to<br>1/8/2021<br>US.       | 10,428,<br>783                             | Infection – Pre-Delta period                                                                              |                                                                                                                             | ≥14 days: 74.7% (66.2-81.1%)                                                       |
|  |       |                                   |                                      |                                            | Infection – Intermediate period                                                                           |                                                                                                                             | ≥14 days: 70.4% (60.1-78.0%)                                                       |
|  |       |                                   |                                      |                                            | Infection – Delta                                                                                         |                                                                                                                             | ≥14 days: 50.6% (45.0-55.7%)                                                       |
|  | (256) | Observational                     | 14/12/2020 to<br>14/8/2021<br>US.    | Delta:<br>2,840<br>Pre-<br>Delta:<br>7,012 | Infection – Delta                                                                                         |                                                                                                                             | 14–119 days: 85% (68-93%)<br>120–149 days: 81% (34-95%)<br>≥150 days: 73% (49-86%) |
|  |       |                                   |                                      |                                            | Infection – Pre-Delta                                                                                     |                                                                                                                             | 91% (81-96%)                                                                       |
|  |       |                                   |                                      |                                            | [NOTE: 33% of study participants received mRNA-1273 (2% received Ad26.COV2.S, and 65% received BNT162b2)] |                                                                                                                             |                                                                                    |
|  | (258) | Observational                     | 1/12/2020 to<br>1/8/2021<br>UK.      | 384,543                                    | Infection - Delta                                                                                         | 75% (64-83%)                                                                                                                |                                                                                    |
|  | (259) | Observational                     | April to May<br>2021.<br>Canada      | 124                                        | Infection                                                                                                 |                                                                                                                             | 52.5% (26.9-69.1%)                                                                 |
|  |       |                                   |                                      |                                            | Symptomatic infection                                                                                     |                                                                                                                             | 65.6% (33.8-82.1%)                                                                 |
|  |       |                                   |                                      |                                            | Severe infection                                                                                          |                                                                                                                             | 78.6% (47.9-91.2%)                                                                 |
|  | (272) | Retrospective<br>cohort           | 1/1/2021 to<br>31/3/2021<br>US.      | 4,722                                      | Infection                                                                                                 | >14 days after first, ≤14 days after second: 91.2% (80.6-96.1%)<br>>14 days: 98.6% (90.1-99.8%)                             |                                                                                    |
|  | (273) | Prospective<br>cohort             | 14/12/2020 to<br>10/4/2021<br>US.    | 3,975                                      | Infection                                                                                                 | ≥14 days after first, <14 days after second: 83% (40-95%)<br>≥14 days: 82% (20-96%)                                         |                                                                                    |
|  | (177) | Randomised<br>controlled<br>trial | 27/7/2020 to<br>23/10/2020<br>US.    | 30,420                                     | Infection                                                                                                 |                                                                                                                             | ≥14 days: 94.1% (89.3-96.8%)                                                       |
|  |       |                                   |                                      |                                            | Infection - ≥18 to <65 years of age                                                                       |                                                                                                                             | ≥14 days: 95.6% (90.6-97.9%)                                                       |
|  |       |                                   |                                      |                                            | Infection - ≥65 years of age                                                                              |                                                                                                                             | ≥14 days: 86.4% (61.4-95.2%)                                                       |
|  | (302) | Retrospective<br>cohort           | 16/7/2021 to<br>15/8/2021<br>US.     | 827                                        | Infection                                                                                                 |                                                                                                                             | ≥14 days: 56.6% (42.0-67.5%)                                                       |
|  |       |                                   |                                      |                                            | Symptomatic infection                                                                                     |                                                                                                                             | ≥14 days: 84.2% (56.4-94.3%)                                                       |
|  | (303) | Retrospective<br>cohort           | 22/12/2020 to<br>2/2/2021<br>US.     | 4,028                                      | Infection                                                                                                 | 8-42 days: 77.5% (61.2-87%)<br>15-42 days: 95% (86-98.2%)                                                                   |                                                                                    |
|  | (304) | Test negative<br>case-control     | 28/10/2020 to<br>10/5/2021<br>Qatar. | 256,037                                    | Infection – Alpha                                                                                         | 0-6 days: 2.4% (0-21.7%)<br>7-13 days: 0.0% (0.0-11.9%)<br>14-20 days: 81.6% (73.1-87.8%)<br>21-27 days: 94.4% (89.1-97.5%) | 0-6 days: 98.0% (94.7-99.5%)<br>7-13 days: 99.2% (95.3-100.0%)                     |
|  |       |                                   |                                      |                                            |                                                                                                           | 0-6 days: 4.2% (0-15.1%)<br>7-13 days: 0.0% (0.0-0.0%)<br>14-20 days: 47.9% (39.5-55.2%)<br>21-27 days: 73.7% (67.6-78.8%)  | 0-6 days: 94.2% (92.1-95.9%)<br>7-13 days: 96.4% (94.3-97.9%)                      |
|  |       |                                   |                                      |                                            |                                                                                                           | 0-6 days: 18.7% (0-44.7%)<br>7-13 days: 0.0% (0.0-10.1%)                                                                    | 0-6 days: 100.0% (93.9-100.0%)<br>7-13 days: 100.0% (86.9-100.0%)                  |
|  |       |                                   |                                      |                                            |                                                                                                           | Any severe, critical, or fatal infection                                                                                    |                                                                                    |

|                                                                                        |                                                                                                   |                       |                             |                               |                                 |                                                                                                  |                                                                                                    |                    |
|----------------------------------------------------------------------------------------|---------------------------------------------------------------------------------------------------|-----------------------|-----------------------------|-------------------------------|---------------------------------|--------------------------------------------------------------------------------------------------|----------------------------------------------------------------------------------------------------|--------------------|
|                                                                                        |                                                                                                   |                       |                             |                               |                                 | 14-20 days: 70.3% (48.9-83.5%)                                                                   |                                                                                                    |                    |
|                                                                                        |                                                                                                   |                       |                             |                               |                                 | 21-27 days: 92.1% (78.4-97.9%)                                                                   |                                                                                                    |                    |
|                                                                                        |                                                                                                   | (305)                 | Retrospective cohort        | 27/4/2021 to 6/6/2021 US.     | 1,945                           | Symptomatic infection - Mesa County, US                                                          | (36% fully vaccinated) Crude vaccine effectiveness 78% (71-84%)                                    |                    |
|                                                                                        |                                                                                                   |                       |                             |                               |                                 | Symptomatic infection - Other Colorado counties, US                                              | (44% fully vaccinated) Crude vaccine effectiveness 89% (88-91%)                                    |                    |
|                                                                                        |                                                                                                   | (306)                 | Prospective cohort          | 18/12/2020 to 31/03/2021 US.  | 705,756                         | Infection                                                                                        | 87.4% (85.6-89.1%)                                                                                 |                    |
|                                                                                        |                                                                                                   |                       |                             |                               |                                 | Hospitalisation                                                                                  | 95.8% (92.5-97.6%)                                                                                 |                    |
|                                                                                        |                                                                                                   |                       |                             |                               |                                 | Hospital death                                                                                   | 97.9% (84.5-99.7%)                                                                                 |                    |
|                                                                                        |                                                                                                   | (307)                 | Test-negative case control  | 1/3/2021 to 27/7/2021 US.     | 8153 cases and matched controls | Infection - Alpha                                                                                | ≥14 days: 90.1 (82.9 to 94.2)      ≥14 days: 98.4 (96.9 to 99.1)                                   |                    |
|                                                                                        |                                                                                                   |                       |                             |                               |                                 | Infection – Delta                                                                                | ≥14 days: 77.0% (60.7-86.5%)      ≥14 days: 86.7% (84.3-88.7%)                                     |                    |
|                                                                                        |                                                                                                   |                       |                             |                               |                                 | Infection – Epsilon                                                                              | ≥14 days: 76.3% (48.1-89.1%)      ≥14 days: 97.6% (90.2-99.4%)                                     |                    |
|                                                                                        |                                                                                                   |                       |                             |                               |                                 | Infection – Gamma                                                                                | ≥14 days: 74.2% (43.8-88.1%)      ≥14 days: 95.5% (90.9-97.8%)                                     |                    |
|                                                                                        |                                                                                                   |                       |                             |                               |                                 | Infection – Iota                                                                                 | ≥14 days: 88.8% (0.7-98.7%)      ≥14 days: 95.7% (81.7-99.0%)                                      |                    |
|                                                                                        |                                                                                                   |                       |                             |                               |                                 | Infection – Mu                                                                                   | ≥14 days: 45.8% (0.0-88.9%)      ≥14 days: 90.4% (73.9-96.5%)                                      |                    |
|                                                                                        |                                                                                                   |                       |                             |                               |                                 | Infection – Other                                                                                | ≥14 days: 84.3% (65.9-92.7%)      ≥14 days: 96.4% (91.2-98.5%)                                     |                    |
|                                                                                        |                                                                                                   |                       |                             |                               |                                 | Infection - Unidentified                                                                         | ≥14 days: 67.6% (57.1-75.6%)      ≥14 days: 79.9% (76.9-82.5%)                                     |                    |
|                                                                                        |                                                                                                   | (278)                 | Test-negative case-control  | January to March 2021 US.     | 1,843                           | Infection                                                                                        | ≥14 days: 81.7% (74.3-86.9%)      ≤2 days: 81.7% (74.3-86.9%)                                      |                    |
|                                                                                        |                                                                                                   |                       |                             |                               |                                 |                                                                                                  | 3-6 days: 81.7% (74.3-86.9%)                                                                       |                    |
|                                                                                        |                                                                                                   |                       |                             |                               |                                 |                                                                                                  | ≥7 days: 93.5% (86.5-96.9%)                                                                        |                    |
|                                                                                        |                                                                                                   |                       |                             |                               |                                 | [NOTE: 24% of case-patients and 22% of controls received mRNA-1273, remainder received BNT162b2] |                                                                                                    |                    |
|                                                                                        |                                                                                                   | (282)                 | Prospective cohort          | 1/5/2021 to 3/9/2021 US.      | 8,690,825                       | Infection - 18-49 years old                                                                      | ≥14 days: 96.3% (95.4-97.2%)                                                                       |                    |
|                                                                                        |                                                                                                   |                       |                             |                               |                                 | Infection - 50-64 years old                                                                      | ≥14 days: 97.3% (96.4-98.1%)                                                                       |                    |
|                                                                                        |                                                                                                   |                       |                             |                               |                                 | Infection - ≤65 years old                                                                        | ≥14 days: 96.0% (95.1-96.9%)                                                                       |                    |
|                                                                                        |                                                                                                   |                       |                             |                               |                                 | Hospitalisation - 18-49 years old                                                                | ≥14 days: 96.6% (94.3-98.1%)                                                                       |                    |
|                                                                                        |                                                                                                   |                       |                             |                               |                                 | Hospitalisation - 50-64 years old                                                                | ≥14 days: 97.3% (95.9-98.2%)                                                                       |                    |
|                                                                                        |                                                                                                   |                       |                             |                               |                                 | Hospitalisation - ≤65 years old                                                                  | ≥14 days: 97.1% (96.5-97.6%)                                                                       |                    |
|                                                                                        |                                                                                                   | (308)                 | Randomised controlled trial | 27/7/2020 to 23/10/2020 US.   | 30,415                          | Asymptomatic infection                                                                           | 63.0% (56.6-68.5%)                                                                                 |                    |
|                                                                                        |                                                                                                   |                       |                             |                               |                                 | Symptomatic infection                                                                            | 93.2% (91.0-94.8%)                                                                                 |                    |
|                                                                                        |                                                                                                   |                       |                             |                               |                                 | Severe infection                                                                                 | 98.2% (92.8-99.6%)                                                                                 |                    |
|                                                                                        |                                                                                                   |                       |                             |                               |                                 | Death                                                                                            | 100.0% (NE-100.0%)                                                                                 |                    |
|                                                                                        |                                                                                                   |                       |                             |                               |                                 |                                                                                                  |                                                                                                    |                    |
| Sinopharm BBIBP-CorV - Aluminium-hydroxide-adjuvanted, inactivated whole virus vaccine | Two doses (0.5ml) intramuscularly (deltoid) with a recommended interval of 3 weeks between doses. | (309)                 | Test-negative case-control  | 18/5/2021 to 20/6/2021 China. | 366                             | Infection                                                                                        | 13.8% (-60.2-54.8%)                                                                                | 59.0% (16.0-81.6%) |
|                                                                                        |                                                                                                   |                       |                             |                               |                                 | Moderately severe infection                                                                      |                                                                                                    | 70.2% (29.6-89.3%) |
|                                                                                        |                                                                                                   |                       |                             |                               |                                 |                                                                                                  | [NOTE: 27.5% of study participants were vaccinated with Sinopharm BIBP (61.3% received CoronaVac)] |                    |
|                                                                                        |                                                                                                   | (310)                 | Retrospective cohort        | May to June 2021 China.       | 10,813                          | Infection with Pneumonia – Delta                                                                 | 8.4% (-47.6-64.4%)                                                                                 | 69.5% (42.8-96.3%) |
|                                                                                        |                                                                                                   |                       |                             |                               |                                 | Severe/critical disease -Delta                                                                   | 100% (NA)                                                                                          | 100% (NA)          |
| (311)                                                                                  | Retrospective cohort                                                                              | 9/2/2021 to 30/6/2021 | 606,772                     | Infection                     | ≥14 days: 15.3 (12.7 to 17.8)   | ≥14 days: 49.2 (47.9 to 50.4)                                                                    |                                                                                                    |                    |
|                                                                                        |                                                                                                   |                       |                             | COVID-19 mortality            | ≥14 days: 45.2% (28.8-57.8%)    | ≥14 days: 93.9% (90.9-95.9%)                                                                     |                                                                                                    |                    |

|  |  |                                                                                                    |                             |                                       |             |                                        |                                  |                                  |
|--|--|----------------------------------------------------------------------------------------------------|-----------------------------|---------------------------------------|-------------|----------------------------------------|----------------------------------|----------------------------------|
|  |  |                                                                                                    |                             | Peru.                                 |             | Infection - ≥60 years old              | ≥14 days: 14.1% (5.2-22.2%)      | ≥14 days: 54.7% (50.7-58.3%)     |
|  |  |                                                                                                    |                             |                                       |             | COVID-19 mortality - ≥60 years old     | ≥14 days: 25.5% (-10.2-49.7%)    | ≥14 days: 90.6% (83.8-94.5%)     |
|  |  | (312)                                                                                              | Randomised controlled trial | 16/7/2020 to 20/12/2020 UAE, Bahrain. | 40,382      | Infection                              |                                  | ≥14 days: 73.5% (60.6-82.2%)     |
|  |  |                                                                                                    |                             |                                       |             | Symptomatic infection                  |                                  | ≥14 days: 78.1% (64.8-86.3%)     |
|  |  |                                                                                                    |                             |                                       |             | Severe infection                       |                                  | ≥14 days: 100% (NA)              |
|  |  | (313)                                                                                              | Retrospective cohort        | 1/9/2020 to 1/5/2021 UAE.             | 176,640     | Hospitalisation                        | -20% (-28.6-11.8%)               | 79.8% (78-81.4%)                 |
|  |  |                                                                                                    |                             |                                       |             | Critical care admission                | 3.7% (-12.8-18.1%)               | 92.2% (89.7-94.1%)               |
|  |  |                                                                                                    |                             |                                       |             | Death                                  | 27.9% (-61-72.6%)                | 97.1% (83-99.9%)                 |
|  |  | (314)                                                                                              | Observational               | 9/12/2020 to 17/7/2021 Bahrain.       | 569,054     | Symptomatic infection                  |                                  | 45.5%                            |
|  |  |                                                                                                    |                             |                                       |             | Hospitalisation                        |                                  | 44.5%                            |
|  |  |                                                                                                    |                             |                                       |             | Hospitalisation - >50 years old        |                                  | 72%                              |
|  |  |                                                                                                    |                             |                                       |             | Death                                  |                                  | 63%                              |
|  |  | [NOTE: 61.3% of study participants were vaccinated with CoronaVac (27.5% recieved Sinopharm BIBP)] |                             |                                       |             |                                        |                                  |                                  |
|  |  | (309)                                                                                              | Test-negative case-control  | 18/5/2021 to 20/6/2021 China.         | 366         | Infection                              | 13.8% (-60.2-54.8%)              | 59.0% (16.0-81.6%)               |
|  |  |                                                                                                    |                             |                                       |             | Moderately severe infection            |                                  | 70.2% (29.6-89.3%)               |
|  |  | (315)                                                                                              | Observational               | 2/2/2021 to 1/5/2021 Chile.           | 10,187, 720 | Infection                              | 17.2% (15.8-18.6%)               | 63.7% (62.8-64.6%)               |
|  |  |                                                                                                    |                             |                                       |             | Hospitalisation                        | 40.3% (37.6-42.8%)               | 86.5% (85.6-87.4%)               |
|  |  |                                                                                                    |                             |                                       |             | Admission to an ICU                    | 45.3% (41.2-49.2%)               | 90.2% (88.9-91.4%)               |
|  |  |                                                                                                    |                             |                                       |             | Death                                  | 46.0% (40.7-50.8%)               | 86.7% (84.9-88.3%)               |
|  |  | (316)                                                                                              | Test-negative case-control  | 17/1/2021 to 29/4/2021 Brazil.        | 43,774      | Symptomatic infection - Gamma          | 0-13 days: -0.8% (-9.4 to 7.2%)  | 0-13 days: 24.7% (14.7 to 33.4%) |
|  |  |                                                                                                    |                             |                                       |             |                                        | ≥14 days: 12.5% (3.7 to 20.6%)   | ≥14 days: 46.8% (38.7 to 53.8%)  |
|  |  |                                                                                                    |                             |                                       |             | Hospitalisation - Gamma                | 0-13 days: 6.6% (-4.3 to 16.3%)  | 0-13 days: 39.1% (28.0 to 48.5%) |
|  |  |                                                                                                    |                             |                                       |             |                                        | ≥14 days: 16.9% (5.7 to 26.8%)   | ≥14 days: 55.5% (46.5 to 62.9%)  |
|  |  |                                                                                                    |                             |                                       |             | Death - Gamma                          | 0-13 days: 13.1% (-1.5 to 25.6%) | 0-13 days: 48.9% (34.4 to 60.1%) |
|  |  |                                                                                                    |                             |                                       |             |                                        | ≥14 days: 31.2% (17.6 to 42.5%)  | ≥14 days: 61.2% (48.9 to 70.5%)  |
|  |  | (317)                                                                                              | Test-negative case-control  | 19/1/2021 to 13/4/2021 Brazil.        | 53,153      | Infection – Gamma                      | ≥14 days: 49.4% 13.2-71.9%)      | ≥14 days: 37.1% (-53.3-74.2%)    |
|  |  |                                                                                                    |                             |                                       |             | Infection                              | ≥14 days: 35.1% (-6.6-60.5%)     | 37.9% (-46.4-73.6%)              |
|  |  | (115)                                                                                              | Prospective cohort          | February to March 2021 Brazil.        | 20,187      | Infection                              |                                  | ≥14 days: 50.7% (33.3-62.5%)     |
|  |  |                                                                                                    |                             |                                       |             |                                        |                                  | ≥21 days: 51.8% (30-66.0%)       |
|  |  |                                                                                                    |                             |                                       |             |                                        |                                  | ≥28 days: 68.4% (51-80.8%)       |
|  |  |                                                                                                    |                             |                                       |             |                                        |                                  | ≥35 days: 73.8% (57-84.8%)       |
|  |  | (318)                                                                                              | Test-negative case-control  | 15/3/2021 to 3/10/2021 Brazil.        | 19,838      | Symptomatic infection – Pregnant women | ≥14 days: 5.02% (-18.22-23.69%)  | ≥14 days: 40.97% (27.07-52.22%)  |
|  |  |                                                                                                    |                             |                                       |             | Severe infection – Pregnant women      | ≥14 days: 67.74% (20-87%)        | ≥14 days: 85.39% (59.44-94.80%)  |
|  |  | (319)                                                                                              |                             |                                       | 2,656       | Symptomatic infection – Gamma          | ≥14 days: 49.6% (11.3-71.4%)     |                                  |

|  |                                                                   |       |                             |                                 |             |                                                                                  |                                                          |                               |                              |
|--|-------------------------------------------------------------------|-------|-----------------------------|---------------------------------|-------------|----------------------------------------------------------------------------------|----------------------------------------------------------|-------------------------------|------------------------------|
|  |                                                                   |       | Test-negative case-control  | 19/1/2021 to 25/3/2021 Brazil.  |             | Symptomatic infection                                                            | ≥14 days: 35.1% (-6.6-60.5%)                             |                               |                              |
|  |                                                                   | (320) | Randomised controlled trial | 14/9/2020 to 5/1/2021 Turkey.   | 10,029      | Symptomatic infection                                                            | 14-27 days: 46.4% (0.4-71.2%)                            | ≥14 days: 83.5% (65.4-92.1%)  |                              |
|  |                                                                   |       |                             |                                 |             | Hospitalisation                                                                  |                                                          | ≥14 days: 100% (20.4-100%)    |                              |
|  |                                                                   | (321) | Randomised controlled trial | 21/7/2020 to 16/12/2020 Brazil. | 9,823       | Infection                                                                        | ≤14 days: -3.3% (-4.8- -1.9%)                            | ≥14 days: 50.7% (35.9-62%)    |                              |
|  |                                                                   |       |                             |                                 |             |                                                                                  | 14-28 days: 94.0% (55.1-99.2%)                           |                               |                              |
|  |                                                                   |       |                             |                                 |             |                                                                                  | ≤28 days: 42.5% (32.9-50.7%)                             |                               |                              |
|  |                                                                   |       |                             |                                 |             |                                                                                  | ≤42 days: 56.5% (49.6-62.5%)                             |                               |                              |
|  |                                                                   |       |                             |                                 |             |                                                                                  | ≤56 days: 60.4% (56.5-63.9%)                             |                               |                              |
|  |                                                                   |       |                             |                                 |             |                                                                                  | ≤70 days: 54.7% (53.2-56.1%)                             |                               |                              |
|  |                                                                   |       |                             |                                 |             |                                                                                  | ≤84 days: 53.7% (52.7-54.7%)                             |                               |                              |
|  |                                                                   |       |                             |                                 |             |                                                                                  | ≤98 days: 52.5% (51.9-53.1%)                             |                               |                              |
|  |                                                                   |       |                             |                                 |             |                                                                                  | Infection requiring medical assistance (hospitalisation) |                               | ≥14 days: 83.7% (58.0-93.7%) |
|  |                                                                   |       |                             |                                 |             |                                                                                  | Moderate infection                                       |                               | ≥14 days: 100% (56.4-100%)   |
|  |                                                                   |       |                             |                                 |             | Severe infection or death                                                        |                                                          | ≥14 days: 100% (16.9-100%)    |                              |
|  |                                                                   |       |                             |                                 |             | Infection - <21 days between 2 doses                                             |                                                          | ≥14 days: 49.1% (33-61.4%)    |                              |
|  |                                                                   |       |                             |                                 |             | Infection - ≥21 days between 2 doses                                             |                                                          | ≥14 days: 62.3% (13.9-83.5%)  |                              |
|  |                                                                   | (295) | Cohort                      | 17/1/2021 to 11/5/2021 Brazil.  | 313,328     | Death                                                                            | ≥21 days: 95.1% (94.7-95.5%)                             | ≥21 days: 99.1% (98.9-99.3%)  |                              |
|  |                                                                   |       |                             |                                 |             | Death – 75-79 years old                                                          | ≥21 days: 86.3% (84.7-87.7%)                             |                               |                              |
|  |                                                                   |       |                             |                                 |             | Death – 80-89 years old                                                          | ≥21 days: 97.6% (97.2-97.9%)                             |                               |                              |
|  |                                                                   |       |                             |                                 |             | Death - ≥90 years old                                                            | ≥21 days: 99.3% (99.1-99.5%)                             |                               |                              |
|  |                                                                   | (296) | Retrospective cohort        | 18/1/2021 to 30/6/2021 Brazil   | 60,577, 870 | Infection                                                                        | ≥14 days: 16.4% (15.2-17.5%)                             | 0-13 days: 40.3% (39.4-41.2%) |                              |
|  |                                                                   |       |                             |                                 |             |                                                                                  |                                                          | ≥14 days: 54.2% (53.4-55.0%)  |                              |
|  |                                                                   |       |                             |                                 |             | Hospitalisation                                                                  | ≥14 days: 26.6% (24.6-28.4%)                             | 0-13 days: 57.3% (56.0-58.6%) |                              |
|  |                                                                   |       |                             |                                 |             |                                                                                  |                                                          | ≥14 days: 72.6% (71.6-73.6%)  |                              |
|  |                                                                   |       |                             |                                 |             | ICU admission                                                                    | ≥14 days: 28.1% (24.9-31.1%)                             | 0-13 days: 58.1% (55.9-60.1%) |                              |
|  |                                                                   |       |                             |                                 |             |                                                                                  |                                                          | ≥14 days: 74.2% (72.6-75.7%)  |                              |
|  |                                                                   |       |                             |                                 |             | Death                                                                            | ≥14 days: 29.4% (26.7-32.0%)                             | 0-13 days: 58.7% (56.9-60.4%) |                              |
|  |                                                                   |       |                             |                                 |             |                                                                                  |                                                          | ≥14 days: 74% (72.6-75.3%)    |                              |
|  |                                                                   |       |                             |                                 |             |                                                                                  |                                                          |                               |                              |
|  | Bharat Biotech – Covaxin – whole virion inactivated virus vaccine | (322) | Randomised controlled trial | 16/11/2020 to 7/1/2021 India.   | 25 798      | Symptomatic infection                                                            |                                                          | ≥14 days: 77.8% (65.2-86.4%)  |                              |
|  |                                                                   |       |                             |                                 |             | Severe disease                                                                   |                                                          | ≥14 days: 93.4% (57.1-99.8%)  |                              |
|  |                                                                   |       |                             |                                 |             | Symptomatic infection – 18-59 years old                                          |                                                          | ≥14 days: 79.4% (66.0-88.2%)  |                              |
|  |                                                                   |       |                             |                                 |             | Symptomatic infection - ≥60 years old                                            |                                                          | ≥14 days: 67.8% (8.0-90.0%)   |                              |
|  |                                                                   |       |                             |                                 |             | Symptomatic infection – participants with pre-existing chronic medical condition |                                                          | ≥14 days: 66.2% (33.8-84.0%)  |                              |
|  |                                                                   |       |                             |                                 |             | Asymptomatic infection                                                           |                                                          | ≥14 days: 63.6% (29.0-82.4%)  |                              |

|                                      |                                                                                                                                                                                                   |                             |                                       |                                     |                       |                                                                                      |                             |                              |
|--------------------------------------|---------------------------------------------------------------------------------------------------------------------------------------------------------------------------------------------------|-----------------------------|---------------------------------------|-------------------------------------|-----------------------|--------------------------------------------------------------------------------------|-----------------------------|------------------------------|
|                                      |                                                                                                                                                                                                   |                             |                                       |                                     |                       | Symptomatic or asymptomatic infection                                                |                             | ≥14 days: 68.8% (46.7-82.5%) |
|                                      |                                                                                                                                                                                                   | (323)                       | Test-negative case-control            | 15/4/2021 to 15/5/2021 India.       | 3,732                 | Symptomatic infection                                                                | <7 days: 40% (-21-71%)      | <14 days: 27% (-35-61%)      |
|                                      |                                                                                                                                                                                                   |                             |                                       |                                     |                       |                                                                                      | ≥7 days: 1% (-30-25%)       | ≥14 days: 50% (33-62%)       |
|                                      |                                                                                                                                                                                                   |                             |                                       |                                     |                       |                                                                                      | ≥21 days: -1% (-51-33%)     | ≥28 days: 46% (22-62%)       |
|                                      |                                                                                                                                                                                                   |                             |                                       |                                     |                       |                                                                                      |                             | ≥42 days: 57% (21-76%)       |
|                                      |                                                                                                                                                                                                   | (293)                       | Cross-sectional observational         | 1/5/2021 to 31/5/2021 India.        | 583                   | Infection                                                                            | <14 days: 15% (-68-57%)     | <14 days: 66% (34-81%)       |
|                                      |                                                                                                                                                                                                   |                             |                                       |                                     |                       |                                                                                      | ≥14 days: 44% (7-66%)       | ≥14 days: 83% (73-89%)       |
|                                      |                                                                                                                                                                                                   |                             |                                       |                                     |                       | Hospitalisation                                                                      | <14 days: 43% (-68-81%)     | <14 days: 83% (17-96%)       |
|                                      |                                                                                                                                                                                                   |                             |                                       |                                     |                       |                                                                                      | ≥14 days: 76% (21-92%)      | ≥14 days: 88% (55-97%)       |
|                                      |                                                                                                                                                                                                   |                             |                                       |                                     |                       | ICU admission or death                                                               | <14 days: 62% (-27-89%)     | <14 days: 93% (35-99%)       |
|                                      |                                                                                                                                                                                                   |                             |                                       |                                     |                       |                                                                                      | ≥14 days: 53% (9-29-83%)    | ≥14 days: 93% (64-99%)       |
|                                      |                                                                                                                                                                                                   |                             |                                       |                                     |                       | [NOTE: Participants either received Covaxin or Covishield (AZD1222)]                 |                             |                              |
|                                      |                                                                                                                                                                                                   | (294)                       | Retrospective cohort                  | 1/6/2020 to 31/5/2021 India.        | 11,405                | Infection (with evidence of prior infection)                                         |                             | ≥14 days: 91.1% (84.1-94.9%) |
|                                      |                                                                                                                                                                                                   |                             |                                       |                                     |                       | Infection (without evidence of prior infection)                                      |                             | ≥14 days: 31.8% (23.5-39.1%) |
|                                      |                                                                                                                                                                                                   |                             |                                       |                                     |                       | [NOTE: 5.77% of participants received Covaxin, 94.23% received Covishield (AZD1222)] |                             |                              |
|                                      |                                                                                                                                                                                                   | (324)                       | Retrospective cohort                  | 3/3/2020 to 18/6/2021 India.        | 15,244                | Reinfection                                                                          |                             | 86% (77-92%)                 |
|                                      |                                                                                                                                                                                                   |                             |                                       |                                     |                       | Symptomatic reinfection                                                              |                             | 87% (76-93%)                 |
|                                      |                                                                                                                                                                                                   |                             |                                       |                                     |                       | Asymptomatic reinfection                                                             |                             | 84% (47-95%)                 |
|                                      |                                                                                                                                                                                                   |                             |                                       |                                     |                       |                                                                                      |                             |                              |
|                                      | <b>Novavax – NVX-CoV2373 (Nuvaxovid) or Serum Institute of India – COVOVAX (Novavax formulation - recombinant SARS-CoV-2 S protein nanoparticle as a coformulation with the adjuvant Matrix-M</b> | (325)                       | Randomised controlled trial           | 28/9/2020 to 28/10/2020 UK.         | 14,039                | Infection                                                                            |                             | 89.7% (80.2-94.6%)           |
| Infection – 18 to 64 years old       |                                                                                                                                                                                                   |                             |                                       |                                     |                       |                                                                                      | 89.8% (79.7-95.5%)          |                              |
| Infection – 65 to 84 years old       |                                                                                                                                                                                                   |                             |                                       |                                     |                       |                                                                                      | 88.9% (20.2-99.7%)          |                              |
| Infection – Alpha                    |                                                                                                                                                                                                   |                             |                                       |                                     |                       |                                                                                      | 86.3% (71.3-93.5%)          |                              |
| Infection – Non-Alpha                |                                                                                                                                                                                                   |                             |                                       |                                     |                       |                                                                                      | 96.4% (73.8-99.5%)          |                              |
|                                      |                                                                                                                                                                                                   | (326)                       | Randomised controlled trial           | 27/12.2020 to 18/2/2021 US, Mexico. | 29,949                | Infection                                                                            |                             | ≥7 days: 89.3% (81.6-93.8%)  |
| Infection – COVID-19 high risk group |                                                                                                                                                                                                   |                             |                                       |                                     |                       |                                                                                      | ≥7 days: 91.0% (83.6-95.0%) |                              |
|                                      |                                                                                                                                                                                                   | (327)                       | Randomised controlled trial           | 28/9/2020 to 28/10/2020 UK.         | 15,139                | Infection                                                                            |                             | 89.8% (79.7-95.5%)           |
| Infection – 18-64 years old          |                                                                                                                                                                                                   |                             |                                       |                                     |                       | 87.5% (-0.2-98.4%)                                                                   |                             |                              |
|                                      | (328)                                                                                                                                                                                             | Randomised controlled trial | 17/7/2020 to 25/11/2020 South Africa. | 2,684                               | Symptomatic infection |                                                                                      | ≥7 days: 49.4% (6.1-72.8%)  |                              |
| Symptomatic infection – Beta         |                                                                                                                                                                                                   |                             |                                       |                                     |                       | ≥7 days: 51.0% (-0.6-76.2%)                                                          |                             |                              |

| Vaccine type                        | Vaccine                         | Company                                                                           | Countries approved for use in                                                                                                 | Clinical trials                                                                                                                                                                                                                                                                                                                                                                                                                                                           |
|-------------------------------------|---------------------------------|-----------------------------------------------------------------------------------|-------------------------------------------------------------------------------------------------------------------------------|---------------------------------------------------------------------------------------------------------------------------------------------------------------------------------------------------------------------------------------------------------------------------------------------------------------------------------------------------------------------------------------------------------------------------------------------------------------------------|
| <b>Inactivated virus</b>            | <b>KoviVac</b>                  | Chumakov Center (Moscow, Russia)                                                  | <b>3 countries:</b><br>Belarus, Cambodia, Russian Federation                                                                  | Phase 1: 502 (Russian Federation).<br>Phase 2:<br>502 (Russian Federation).<br>622 (Russian Federation).                                                                                                                                                                                                                                                                                                                                                                  |
|                                     | <b>QazVac</b>                   | Kazakhstan Research Institute for Biological Safety Problems (RIBSP) (Kazakhstan) | <b>2 countries:</b><br>Kazakhstan, Kyrgyzstan                                                                                 | Phase 1: NCT04530357 (Kazakhstan).<br>Phase 2: NCT04530357 (Kazakhstan).<br>Phase 3: NCT04691908 (Kazakhstan).                                                                                                                                                                                                                                                                                                                                                            |
|                                     | <b>KCONVAC</b>                  | Minhai Biotechnology Co. (Beijing, China)                                         | <b>2 countries:</b><br>China, Indonesia                                                                                       | Phase 1:<br>NCT05003479 (China).<br>ChiCTR2000038804, NCT04758273 (China).<br>Phase 2:<br>ChiCTR2000039462, NCT04756323 (China).<br>NCT05003466 (China).<br>Phase 3: NCT04852705                                                                                                                                                                                                                                                                                          |
|                                     | <b>COVIran Barekat</b>          | Shifa Pharmed Industrial Co. (Tehran, Iran)                                       | <b>1 country:</b><br>Iran                                                                                                     | Phase 1:<br>IRCT20201202049567N1 (Iran).<br>IRCT20201202049567N2 (Iran).<br>IRCT20171122037571N3 (Iran).<br>Phase 2:<br>IRCT20201202049567N3 (Iran).<br>IRCT20171122037571N3 (Iran).<br>Phase 3: IRCT20201202049567N3 (Iran).                                                                                                                                                                                                                                             |
|                                     | <b>Inactivated (Vero Cells)</b> | Sinopharm (Wuhan, China)                                                          | <b>2 countries:</b><br>China, Philippines                                                                                     | Phase 1: ChiCTR2000031809 (China)<br>Phase 2:<br>NCT04885764 (Egypt).<br>ChiCTR2000031809 (China).<br>Phase 3:<br>NCT04885764 (Egypt).<br>ChiCTR2000034780 (United Arab Emirates).<br>NCT04612972 (Peru).<br>NCT04510207 (Bahrain, Egypt, Jordan, United Arab Emirates).<br>ChiCTR2000039000 (Morocco).                                                                                                                                                                   |
|                                     | <b>Turkovac</b>                 | Health Institutes of Turkey (Istanbul, Turkey)                                    | <b>1 country:</b><br>Turkey                                                                                                   | Phase 1: NCT04691947 (Turkey).<br>Phase 2:<br>NCT04824391 (Turkey).<br>NCT04979949 (Turkey).<br>NCT05035238 (Turkey).<br>Phase 3:<br>NCT04942405 (Turkey).<br>NCT05077176 (Turkey).                                                                                                                                                                                                                                                                                       |
|                                     | <b>FAKHRAVAC (MIVAC)</b>        | Organization of Defensive Innovation and Research (Tehran, Iran)                  | <b>1 country:</b><br>Iran                                                                                                     | Phase 1: IRCT20210206050259N1 (Iran).<br>Phase 2: IRCT20210206050259N2 (Iran).<br>Phase 3: IRCT20210206050259N3 (Iran).                                                                                                                                                                                                                                                                                                                                                   |
| <b>Non-replicating viral vector</b> | <b>Convidecia</b>               | CanSino (Tianjin, China)                                                          | <b>10 countries:</b><br>Argentina, Chile, China, Ecuador, Hungary, Indonesia, Malaysia, Mexico, Pakistan, Republic of Moldova | Phase 1:<br>NCT05043259 (China).<br>ChiCTR2000030906, NCT04313127 (China).<br>NCT04568811 (China).<br>NCT04840992 (China).<br>Phase 2:<br>NCT05043259 (China).<br>NCT05162482 (Pakistan).<br>NCT04840992 (China).<br>ChiCTR2000031781, NCT04341389 (China).<br>NCT04566770 (China).<br>NCT05005156 (Argentina).<br>Phase 3:<br>NCT05169008 (Chile, Mexico).<br>NCT04526990 (Argentina, Chile, Mexico, Pakistan, Russian Federation).<br>NCT04540419 (Russian Federation). |
|                                     | <b>Sputnik Light</b>            | Gamaleya Research Institute of Epidemiology and                                   | <b>24 countries:</b><br>Angola, Argentina, Armenia, Bahrain, Belarus, Cambodia, Egypt, Iran, Kazakhstan,                      | Phase 1: NCT04713488 (Russian Federation).<br>Phase 2:<br>NCT04713488 (Russian Federation).                                                                                                                                                                                                                                                                                                                                                                               |



|                            |                                          |                                                                                           |                                                                                                                                                                                                                                                                                                                                                                                                                                                                                                                                                                                                                                                                                                                                                                                                                                                                                                                                                                                       |                                                                                                                                                                                                                                                                                                                                                                                                                                                                                                                                                                                                                                                                                                                                                                                                                        |
|----------------------------|------------------------------------------|-------------------------------------------------------------------------------------------|---------------------------------------------------------------------------------------------------------------------------------------------------------------------------------------------------------------------------------------------------------------------------------------------------------------------------------------------------------------------------------------------------------------------------------------------------------------------------------------------------------------------------------------------------------------------------------------------------------------------------------------------------------------------------------------------------------------------------------------------------------------------------------------------------------------------------------------------------------------------------------------------------------------------------------------------------------------------------------------|------------------------------------------------------------------------------------------------------------------------------------------------------------------------------------------------------------------------------------------------------------------------------------------------------------------------------------------------------------------------------------------------------------------------------------------------------------------------------------------------------------------------------------------------------------------------------------------------------------------------------------------------------------------------------------------------------------------------------------------------------------------------------------------------------------------------|
|                            |                                          | Microbiology<br>(Moscow, Russia)                                                          | Kyrgyzstan, Lao People's<br>Democratic Republic,<br>Mauritius, Mongolia,<br>Nicaragua, Philippines,<br>Republic of the Congo, Russian<br>Federation, San Marino,<br>Tunisia, Turkmenistan, United<br>Arab Emirates, United Republic<br>of Tanzania, Venezuela, West<br>Bank                                                                                                                                                                                                                                                                                                                                                                                                                                                                                                                                                                                                                                                                                                           | NCT05027672 (Argentina).<br>Phase 3: NCT04741061 (Russian<br>Federation).                                                                                                                                                                                                                                                                                                                                                                                                                                                                                                                                                                                                                                                                                                                                              |
|                            | <b>Sputnik V</b>                         | Gamaleya Research<br>Institute of<br>Epidemiology and<br>Microbiology<br>(Moscow, Russia) | <b>74 countries:</b><br>Albania, Algeria, Angola,<br>Antigua and Barbuda,<br>Argentina, Armenia,<br>Azerbaijan, Bahrain,<br>Bangladesh, Belarus, Bolivia,<br>Bosnia and Herzegovina, Brazil,<br>Cambodia, Cameroon, Chile,<br>Djibouti, Ecuador, Egypt,<br>Gabon, Ghana, Guatemala,<br>Guinea, Guyana, Honduras,<br>Hungary, India, Indonesia, Iran,<br>Iraq, Jordan, Kazakhstan,<br>Kenya, Kyrgyzstan, Lao<br>People's Democratic Republic,<br>Lebanon, Libya, Maldives, Mali,<br>Mauritius, Mexico, Mongolia,<br>Montenegro, Morocco,<br>Myanmar, Namibia, Nepal,<br>Nicaragua, Nigeria, North<br>Macedonia, Oman, Pakistan,<br>Panama, Paraguay, Philippines,<br>Republic of Moldova, Republic<br>of the Congo, Russian<br>Federation, Rwanda, Saint<br>Vincent and the Grenadines,<br>San Marino, Serbia, Seychelles,<br>Sri Lanka, Syrian Arab Republic,<br>Tunisia, Turkey, Turkmenistan,<br>United Arab Emirates,<br>Uzbekistan, Venezuela,<br>Vietnam, West Bank,<br>Zimbabwe | Phase 1:<br>NCT04760730 (United Arab Emirates).<br>NCT04684446 (Belarus, Russian Federation).<br>NCT04436471, 241 (Russian Federation).<br>NCT04437875 (Russian Federation).<br>Phase 2:<br>NCT05027672 (Argentina).<br>NCT04988048 (Argentina).<br>NCT04954092 (Russian Federation).<br>NCT04962906 (Argentina).<br>NCT04983537 (Argentina).<br>NCT04760730 (United Arab Emirates).<br>NCT04684446 (Belarus, Russian Federation).<br>NCT04686773 (Azerbaijan).<br>NCT04436471, 241 (Russian Federation).<br>NCT04437875 (Russian Federation).<br>NCT04587219 (Russian Federation).<br>NCT04640233 (India).<br>Phase 3:<br>NCT04564716 (Belarus).<br>NCT04530396 (Russian Federation).<br>NCT04642339 (Venezuela).<br>NCT04656613 (United Arab Emirates).<br>NCT04954092 (Russian Federation).<br>NCT04640233 (India). |
| <b>RNA</b>                 | <b>TAK-919 (Moderna<br/>formulation)</b> | Takeda (Tokyo, Japan)                                                                     | <b>1 country:</b><br>Japan                                                                                                                                                                                                                                                                                                                                                                                                                                                                                                                                                                                                                                                                                                                                                                                                                                                                                                                                                            | Phase 1: NCT04677660 (Japan).<br>Phase 2: NCT04677660 (Japan).                                                                                                                                                                                                                                                                                                                                                                                                                                                                                                                                                                                                                                                                                                                                                         |
| <b>DNA</b>                 | <b>ZyCoV-D</b>                           | Zyduz Cadila<br>(Ahmedabad, India)                                                        | <b>1 country:</b><br>India                                                                                                                                                                                                                                                                                                                                                                                                                                                                                                                                                                                                                                                                                                                                                                                                                                                                                                                                                            | Phase 1:<br>CTRI/2020/07/026352 (India).<br>CTRI/2021/03/032051 (India).<br>Phase 2:<br>CTRI/2020/07/026352 (India).<br>CTRI/2021/03/032051 (India).<br>Phase 3: CTRI/2021/01/030416 (India).                                                                                                                                                                                                                                                                                                                                                                                                                                                                                                                                                                                                                          |
| <b>Protein<br/>subunit</b> | <b>ZF2001</b>                            | Anhui Zhifei Longcom<br>(Hefei, China)                                                    | <b>3 countries:</b><br>China, Indonesia,<br>Uzbekistan                                                                                                                                                                                                                                                                                                                                                                                                                                                                                                                                                                                                                                                                                                                                                                                                                                                                                                                                | Phase 1:<br>NCT04445194 (China).<br>NCT04636333 (China).<br>NCT04550351, ChiCTR2000035691 (China).<br>NCT04961359 (China).<br>Phase 2:<br>NCT04466085 (China).<br>NCT05109598 (China).<br>NCT04813562 (China).<br>Phase 3:<br>NCT05091411 (China).<br>NCT05128643 (China).<br>NCT05107375 (China).<br>ChiCTR2000040153, NCT04646590 (China,<br>Ecuador, Indonesia, Pakistan, Uzbekistan).<br>ChiCTR2100050849 (China).                                                                                                                                                                                                                                                                                                                                                                                                 |
|                            | <b>Abdala</b>                            | Center for Genetic<br>Engineering and<br>Biotechnology (CIGB)<br>(Havana, Cuba)           | <b>6 countries:</b><br>Cuba, Mexico, Nicaragua,<br>Saint Vincent and the<br>Grenadines, Venezuela,<br>Vietnam                                                                                                                                                                                                                                                                                                                                                                                                                                                                                                                                                                                                                                                                                                                                                                                                                                                                         | Phase 1:<br>RPCEC00000345 (Cuba).<br>RPCEC00000346 (Cuba).<br>Phase 2:<br>RPCEC00000345 (Cuba)<br>RPCEC00000346 (Cuba).                                                                                                                                                                                                                                                                                                                                                                                                                                                                                                                                                                                                                                                                                                |

|    |                                                           |                                                               |                                                                                    |                                                                                                                                                                                                                                                                                                    |
|----|-----------------------------------------------------------|---------------------------------------------------------------|------------------------------------------------------------------------------------|----------------------------------------------------------------------------------------------------------------------------------------------------------------------------------------------------------------------------------------------------------------------------------------------------|
|    |                                                           |                                                               |                                                                                    | Phase 3: RPCEC00000359 (Cuba).                                                                                                                                                                                                                                                                     |
| 1  | <b>EpiVacCorona</b>                                       | FBRI (Koltsovo, Russia)                                       | <b>4 countries:</b><br>Cambodia, Russian<br>Federation, Turkmenistan,<br>Venezuela | Phase 1: NCT04527575 (Russian<br>Federation).<br>Phase 2: NCT04527575 (Russian<br>Federation).<br>Phase 3: NCT04780035 (Russian<br>Federation).<br>NCT05021016 (Russian Federation)                                                                                                                |
| 2  |                                                           |                                                               |                                                                                    |                                                                                                                                                                                                                                                                                                    |
| 3  |                                                           |                                                               |                                                                                    |                                                                                                                                                                                                                                                                                                    |
| 4  |                                                           |                                                               |                                                                                    |                                                                                                                                                                                                                                                                                                    |
| 5  |                                                           |                                                               |                                                                                    |                                                                                                                                                                                                                                                                                                    |
| 6  |                                                           |                                                               |                                                                                    |                                                                                                                                                                                                                                                                                                    |
| 7  |                                                           |                                                               |                                                                                    |                                                                                                                                                                                                                                                                                                    |
| 8  | <b>Aurora-CoV</b>                                         | FBRI (Koltsovo, Russia)                                       | <b>1 country:</b><br>Russian Federation                                            | Phase 1: 197 (Russian Federation).<br>Phase 2: 197 (Russian Federation).                                                                                                                                                                                                                           |
| 9  |                                                           |                                                               |                                                                                    |                                                                                                                                                                                                                                                                                                    |
| 10 | <b>MVC-COV1901</b>                                        | Medigen<br>Biotechnology Corp.<br>(Taipei City, Taiwan)       | <b>2 countries:</b><br>Somaliland, Taiwan                                          | Phase 1:<br>NCT05132855 (Taiwan).<br>NCT04487210 (Taiwan).<br>Phase 2:<br>NCT05132855 (Taiwan).<br>NCT04695652 (Taiwan, Vietnam).<br>NCT04822025 (Taiwan).<br>NCT04951388 (Taiwan).<br>NCT05038618 (Taiwan).<br>NCT05048849 (Taiwan).<br>NCT05054621 (Taiwan).<br>Phase 3: NCT05011526 (Paraguay)  |
| 11 |                                                           |                                                               |                                                                                    |                                                                                                                                                                                                                                                                                                    |
| 12 |                                                           |                                                               |                                                                                    |                                                                                                                                                                                                                                                                                                    |
| 13 |                                                           |                                                               |                                                                                    |                                                                                                                                                                                                                                                                                                    |
| 14 |                                                           |                                                               |                                                                                    |                                                                                                                                                                                                                                                                                                    |
| 15 |                                                           |                                                               |                                                                                    |                                                                                                                                                                                                                                                                                                    |
| 16 |                                                           |                                                               |                                                                                    |                                                                                                                                                                                                                                                                                                    |
| 17 |                                                           |                                                               |                                                                                    |                                                                                                                                                                                                                                                                                                    |
| 18 |                                                           |                                                               |                                                                                    |                                                                                                                                                                                                                                                                                                    |
| 19 |                                                           |                                                               |                                                                                    |                                                                                                                                                                                                                                                                                                    |
| 20 |                                                           |                                                               |                                                                                    |                                                                                                                                                                                                                                                                                                    |
| 21 | <b>SpikoGen</b>                                           | Vaxine/CinnaGen Co.<br>(Iran)                                 | <b>1 country:</b><br>Iran                                                          | Phase 1: NCT04453852 (Australia).<br>Phase 2:<br>IRCT20150303021315N23 (Iran).<br>NCT04944368, IRCT20150303021315N23<br>(Iran).<br>NCT05148871 (Australia).<br>Phase 3: NCT05005559,<br>IRCT20150303021315N24 (Iran).<br>NCT05148871 (Australia).<br>NCT05175625, IRCT20150303021315N26<br>(Iran). |
| 22 |                                                           |                                                               |                                                                                    |                                                                                                                                                                                                                                                                                                    |
| 23 |                                                           |                                                               |                                                                                    |                                                                                                                                                                                                                                                                                                    |
| 24 |                                                           |                                                               |                                                                                    |                                                                                                                                                                                                                                                                                                    |
| 25 |                                                           |                                                               |                                                                                    |                                                                                                                                                                                                                                                                                                    |
| 26 |                                                           |                                                               |                                                                                    |                                                                                                                                                                                                                                                                                                    |
| 27 |                                                           |                                                               |                                                                                    |                                                                                                                                                                                                                                                                                                    |
| 28 |                                                           |                                                               |                                                                                    |                                                                                                                                                                                                                                                                                                    |
| 29 |                                                           |                                                               |                                                                                    |                                                                                                                                                                                                                                                                                                    |
| 30 |                                                           |                                                               |                                                                                    |                                                                                                                                                                                                                                                                                                    |
| 31 | <b>Corbevax</b>                                           | Biological E Limited<br>(Telangana, India)                    | <b>1 country:</b><br>India                                                         | Phase 1: CTRI/2020/11/029032 (India).<br>Phase 2:<br>CTRI/2020/11/029032 (India).<br>CTRI/2021/06/034014 (India).<br>CTRI/2021/10/037066 (India).<br>Phase 3:<br>CTRI/2021/06/034014 (India).<br>CTRI/2021/08/036074 (India).<br>CTRI/2021/10/037066 (India).                                      |
| 32 |                                                           |                                                               |                                                                                    |                                                                                                                                                                                                                                                                                                    |
| 33 |                                                           |                                                               |                                                                                    |                                                                                                                                                                                                                                                                                                    |
| 34 |                                                           |                                                               |                                                                                    |                                                                                                                                                                                                                                                                                                    |
| 35 |                                                           |                                                               |                                                                                    |                                                                                                                                                                                                                                                                                                    |
| 36 |                                                           |                                                               |                                                                                    |                                                                                                                                                                                                                                                                                                    |
| 37 |                                                           |                                                               |                                                                                    |                                                                                                                                                                                                                                                                                                    |
| 38 |                                                           |                                                               |                                                                                    |                                                                                                                                                                                                                                                                                                    |
| 39 | <b>Soberana 02</b>                                        | Instituto Finlay de<br>Vacunas Cuba<br>(Havana, Cuba)         | <b>4 countries:</b><br>Cuba, Iran, Nicaragua,<br>Venezuela                         | Phase 1: IFV/COR/06 (Cuba).<br>Phase 2: IFV/COR/08 (Cuba).<br>Phase 3: IFV/COR/09 (Cuba).                                                                                                                                                                                                          |
| 40 |                                                           |                                                               |                                                                                    |                                                                                                                                                                                                                                                                                                    |
| 41 |                                                           |                                                               |                                                                                    |                                                                                                                                                                                                                                                                                                    |
| 42 | <b>Soberana Plus</b>                                      | Instituto Finlay de<br>Vacunas Cuba<br>(Havana, Cuba)         | <b>1 country:</b><br>Cuba                                                          | Phase 1:<br>IFV/COR/15 (Cuba).<br>IFV/COR/05 (Cuba).<br>Phase 2:<br>IFV/COR/11 (Cuba).<br>IFV/COR/15 (Cuba).<br>Phase 3: IFV/COR/09 (Cuba).                                                                                                                                                        |
| 43 |                                                           |                                                               |                                                                                    |                                                                                                                                                                                                                                                                                                    |
| 44 |                                                           |                                                               |                                                                                    |                                                                                                                                                                                                                                                                                                    |
| 45 |                                                           |                                                               |                                                                                    |                                                                                                                                                                                                                                                                                                    |
| 46 |                                                           |                                                               |                                                                                    |                                                                                                                                                                                                                                                                                                    |
| 47 |                                                           |                                                               |                                                                                    |                                                                                                                                                                                                                                                                                                    |
| 48 | <b>Razi Cov Pars</b>                                      | Razi Vaccine and<br>Serum Research<br>Institute (Karaj, Iran) | <b>1 country:</b><br>Iran                                                          | Phase 1: IRCT20201214049709N1 (Iran).<br>Phase 2: IRCT20201214049709N2 (Iran).<br>Phase 3: IRCT20201214049709N3 (Iran).                                                                                                                                                                            |
| 49 |                                                           |                                                               |                                                                                    |                                                                                                                                                                                                                                                                                                    |
| 50 |                                                           |                                                               |                                                                                    |                                                                                                                                                                                                                                                                                                    |
| 51 | <b>Recombinant SARS-<br/>CoV-2 Vaccine (CHO<br/>Cell)</b> | National Vaccine and<br>Serum Institute<br>(Beijing, China)   | <b>1 country:</b><br>United Arab Emirates                                          | Phase 1: NCT04869592 (China).<br>Phase 2: NCT04869592 (China)<br>Phase 3: NCT05069129 (United Arab<br>Emirates)                                                                                                                                                                                    |
| 52 |                                                           |                                                               |                                                                                    |                                                                                                                                                                                                                                                                                                    |
| 53 |                                                           |                                                               |                                                                                    |                                                                                                                                                                                                                                                                                                    |
| 54 |                                                           |                                                               |                                                                                    |                                                                                                                                                                                                                                                                                                    |
| 55 |                                                           |                                                               |                                                                                    |                                                                                                                                                                                                                                                                                                    |
| 56 |                                                           |                                                               |                                                                                    |                                                                                                                                                                                                                                                                                                    |
| 57 |                                                           |                                                               |                                                                                    |                                                                                                                                                                                                                                                                                                    |
| 58 |                                                           |                                                               |                                                                                    |                                                                                                                                                                                                                                                                                                    |
| 59 |                                                           |                                                               |                                                                                    |                                                                                                                                                                                                                                                                                                    |
| 60 |                                                           |                                                               |                                                                                    |                                                                                                                                                                                                                                                                                                    |



## **Supplementary file 1:**

### **1a: Specific database search terms:**

“transmission”, “host cell entry”, “clinical presentation”, “symptoms”, “risk factors”, “genetic risk”, “coronavirus”, “structure”, “genetics”, “replication”, open reading frame”, “structural proteins”, “accessory proteins”, “spike”, “receptor binding domain”, “mutation”, “variant of concern”, “variant of interest”, “alpha”, “beta”, “gamma”, “delta”, “omicron”, “lambda”, “mu”, “pfizer”, “BNT162b2”, “oxford-AstraZeneca”, “AZD1222”, “ChAdOx1”, “johnson and johnson”, “janssen”, “Ad26.COV.2.S”, “moderna”, “mrna-1273”, “sinopharm”, “BBIBP-CorV”, “sinovac”, “CoronaVac”, “bharat biotech”, “Covaxin”, “BBV152”, “Novavax”, “Coalition for Epidemic Preparedness Innovations”, “Covovax”, “Nuvaxovid”, “NVX-CoV2372”, “immunogenicity” “antibody”, “neutralisation”, “reactogenicity”, “safety”, “adverse events”, “effectiveness”, “efficacy”, “immunity”, “booster”, “treatment”, “therapy”, “guideline”, “recommendations”.

### **1b: Selection of studies (inclusion/exclusion criteria):**

***Virology studies*** – preference was given to studies directly examining/discussing SARS-CoV-2, however, useful papers that explored the structure, genetics, and virology of coronaviruses in general were considered.

***Variant studies*** – in general, large epidemiological studies that explored the prevalence and risk of certain outcomes (e.g. hospitalisation, death, etc.) with COVID-19 infection for certain variants were included. Authors aimed to include studies from multiple countries.

***Vaccine studies*** – Studies with human derived data (e.g. blood sera, phase 1/2 trials) were of greatest interest when collating information on immunogenicity, reactogenicity, and safety. Large randomised controlled trials, test-negative case-control, and observational studies were of selected when exploring vaccine efficacy. Review articles summarising effectiveness studies were excluded, unless a meta-analysis was performed.

| Variants of concern             |                                 |                                 |            |       |       |                          |                              |
|---------------------------------|---------------------------------|---------------------------------|------------|-------|-------|--------------------------|------------------------------|
| WHO nomenclature or designation | Pango Lineage                   | S protein mutations of interest |            |       |       |                          | First detected samples *     |
| Alpha                           | B.1.1.7                         | N501Y                           | D614G      | P681H |       |                          | UK, Sept 2020                |
| Beta                            | B.1.351                         | N501Y                           | D614G      | E484K | K417N | A701V                    | South Africa, May 2020       |
| Gamma                           | P.1                             | N501Y                           | D614G      | E484K | K417T | H655Y                    | Brazil, Nov 2020             |
| Delta                           | B.1.617.2                       | L452R                           | D614G      | P681R | T478K |                          | India, Oct 2020              |
| Omicron                         | B.1.1.529                       | N501Y                           | D614G      | E484A | P681H | K417N                    | H655Y                        |
|                                 |                                 | A67V                            | Δ69-70     | T95I  | G142D | Δ143-145                 | N211I                        |
|                                 |                                 | Δ212                            | ins215EPE  | G339D | S371L | S373P                    | S375F                        |
|                                 |                                 | N440K                           | G446S      | S477N | T478K | Q493R                    | G496S                        |
|                                 |                                 | Q498R                           | Y505H      | T547K | N679K | N764K                    | D796Y                        |
|                                 |                                 | N856K                           | Q954H      | N969K | L981F |                          |                              |
| Variants of Interest            |                                 |                                 |            |       |       |                          |                              |
| WHO nomenclature or designation | Pango Lineage                   | S protein mutations of interest |            |       |       |                          | First detected samples *     |
| Lambda                          | C.37                            | L452Q                           | D614G      | F490S |       |                          | Peru, Dec 2020               |
| Mu                              | B.1.621                         | N501Y                           | D614G      | P681H | R346K | E484K                    | Columbia, Jan 2021           |
| Variants under monitoring       |                                 |                                 |            |       |       |                          |                              |
| Pango Lineage                   | S protein mutations of interest |                                 |            |       |       | First detected samples * |                              |
| B.1.1.318                       |                                 | D614G                           | P681H      | E484K |       |                          | Multiple countries, Jan 2021 |
| C.1.2                           |                                 | N501Y                           | D614G      | E484K | H655Y | N679K                    | Y449H                        |
| B.1.640                         |                                 | N501Y                           | D614G      | P681H | F490R | N394S                    | R346S                        |
|                                 |                                 | Y449N                           | 137-145del |       |       |                          |                              |

| Vaccine and vaccine type                         | Recommended dose and administration                                                                             | Study ref.                                                                                 | Study type                  | Study date and location(s)                                                           | N            | Vaccine effectiveness % (95% confidence interval) * |                                |                        |  |  |
|--------------------------------------------------|-----------------------------------------------------------------------------------------------------------------|--------------------------------------------------------------------------------------------|-----------------------------|--------------------------------------------------------------------------------------|--------------|-----------------------------------------------------|--------------------------------|------------------------|--|--|
|                                                  |                                                                                                                 |                                                                                            |                             |                                                                                      |              | Against                                             | One dose                       | Two doses              |  |  |
| Pfizer/BioNtech (BNT162b2) – mRNA.               | Two doses (30µg, 0.3ml each) intramuscularly (deltoid) with a recommended interval of 21-28 days between doses. | (156)                                                                                      | Randomised controlled trial | 27/7/2020 to 14/11/2020<br>US, Argentina, Brazil, South Africa, Germany, and Turkey. | 37,706       | Symptomatic infection                               |                                | 95% (90.3–97.6%)       |  |  |
|                                                  |                                                                                                                 | (241)                                                                                      | Observational               | 20/12/2020 to 1/2/2021<br>Israel.                                                    | 1,193,236    | Documented infection                                | 46% (40-51%)                   | 92% (88-95%)           |  |  |
|                                                  |                                                                                                                 |                                                                                            |                             |                                                                                      |              | Symptomatic infection                               | 57% (50-63%)                   | 94% (87-98%)           |  |  |
|                                                  |                                                                                                                 |                                                                                            |                             |                                                                                      |              | Hospitalisation                                     | 74% (56-86%)                   | 87% (55-100%)          |  |  |
|                                                  |                                                                                                                 |                                                                                            |                             |                                                                                      |              | Severe disease                                      | 62% (39-80%)                   | 92% (75-100%)          |  |  |
|                                                  |                                                                                                                 | (242)                                                                                      | Test-negative case-control  | 26/10/2020 to 16/5/2021<br>UK.                                                       | 19,109       | Infection with Alpha                                | 47.5% (41.6–52.8%)             | 93.7% (91.6–95.3%)     |  |  |
|                                                  |                                                                                                                 |                                                                                            |                             |                                                                                      |              | Infection with Delta                                | 35.6% (22.7–46.4%)             | 88.0% (85.3–90.1%)     |  |  |
|                                                  |                                                                                                                 | (243)                                                                                      | Test-negative case-control  | 1/2/2021 to 31/3/2021<br>Qatar.                                                      | 213,758      | Infection with Beta                                 |                                | 75.0% (70.5-78.9%)     |  |  |
|                                                  |                                                                                                                 |                                                                                            |                             |                                                                                      |              | Infection with Alpha or Beta                        |                                | 97.4% (92.2-99.5%)     |  |  |
|                                                  |                                                                                                                 | (244)                                                                                      | Test-negative case-control  | 14/12/2020 to 19/4/2021<br>Canada.                                                   | 324,033      | Symptomatic infection                               | 14-20 days: 48% (41-54%)       | ≥7 days: 91% (89-93%)  |  |  |
|                                                  |                                                                                                                 |                                                                                            |                             |                                                                                      |              |                                                     | ≥14 days: 60% (57-64%)         |                        |  |  |
|                                                  |                                                                                                                 |                                                                                            |                             |                                                                                      |              |                                                     | 35-41 days: 71% (63-78%)       |                        |  |  |
|                                                  |                                                                                                                 |                                                                                            |                             |                                                                                      |              | Hospital admission or death                         | 14-20 days: 62% (44-75%)       | ≥7 days: 98% (88-100%) |  |  |
|                                                  |                                                                                                                 |                                                                                            |                             |                                                                                      |              |                                                     | ≥14 days: 70% (60-77%)         |                        |  |  |
|                                                  |                                                                                                                 |                                                                                            |                             |                                                                                      |              |                                                     | ≥35 days: 91% (73-97%)         |                        |  |  |
|                                                  |                                                                                                                 | [NOTE: Participants in this study received an mRNA vaccine (either BNT162b2 or mRNA-1273)] |                             |                                                                                      |              |                                                     |                                |                        |  |  |
|                                                  |                                                                                                                 | (245)                                                                                      | Test-negative case-control  | 14/12/2020 to 3/8/2021<br>Canada.                                                    | 682,071      | Symptomatic infection - Alpha                       | ≥14 days: 66% (95% CI: 64-68%) | ≥7 days: 89% (86–91%)  |  |  |
|                                                  |                                                                                                                 |                                                                                            |                             |                                                                                      |              | Symptomatic infection - Beta or Gamma variants      | ≥14 days: 60% (52-67%)         | ≥7 days: 84% (69–92%)  |  |  |
|                                                  |                                                                                                                 |                                                                                            |                             |                                                                                      |              | Symptomatic infection - Delta                       | ≥14 days: 56% (45-64%)         | ≥7 days: 87% (64–95%)  |  |  |
|                                                  |                                                                                                                 |                                                                                            |                             |                                                                                      |              | Against hospitalisation or death - Alpha            | ≥14 days: 80% (78-82%)         | ≥7 days: 95% (92-97%)  |  |  |
| Against hospitalisation or death - Beta or Gamma | ≥14 days: 77% (69-83%)                                                                                          |                                                                                            |                             |                                                                                      |              | ≥7 days: 95% (81-99%)                               |                                |                        |  |  |
| Against hospitalisation or death - Delta         | ≥14 days: 78% (65-86%)                                                                                          |                                                                                            |                             |                                                                                      |              |                                                     |                                |                        |  |  |
| (246)                                            | Retrospective case-control                                                                                      | January to July 2021<br>US.                                                                | 119,463                     | Infection                                                                            |              | ≥14 days: 86% (81-90.6%)                            |                                |                        |  |  |
|                                                  |                                                                                                                 |                                                                                            |                             | Hospitalisation                                                                      |              | ≥14 days: 85% (73-93%)                              |                                |                        |  |  |
|                                                  |                                                                                                                 |                                                                                            |                             | Admission to an ICU                                                                  |              | ≥14 days: 87% (46-98.6%)                            |                                |                        |  |  |
| (133)                                            | Test-negative observational                                                                                     | 1/4/2021 to 6/6/2021<br>Scotland.                                                          | 400,827                     | Infection - Alpha                                                                    |              | 92% (90–93%)                                        |                                |                        |  |  |
|                                                  |                                                                                                                 |                                                                                            |                             | Infection - Delta                                                                    |              | 79% (75-82%)                                        |                                |                        |  |  |
| (247)                                            | Test-negative                                                                                                   | 12/4/2021 to                                                                               | 14,019                      | Hospitalisation - Alpha                                                              | 83% (62-93%) | 95% (78-99%)                                        |                                |                        |  |  |

|  |       |                               |                                        |                                               |                                 |                                |                              |
|--|-------|-------------------------------|----------------------------------------|-----------------------------------------------|---------------------------------|--------------------------------|------------------------------|
|  |       | case-control                  | 4/6/2021<br>England.                   |                                               | Hospitalisation - Delta         | 94% (46-99%)                   | 96% (86-99%)                 |
|  | (248) | Test-negative<br>case-control | 8/12/2020 to<br>19/2/2021.<br>England. | 156,930                                       | Infection                       |                                | 10-13 days: 70% (59-78%)     |
|  |       |                               |                                        |                                               |                                 |                                | ≥14 days: 89% (85-93%)       |
|  |       |                               |                                        |                                               |                                 |                                | 28-34 days: 61% (51-69%)     |
|  | (249) | Test-negative<br>case-control | 4/4/2021 to<br>1/5/2021<br>Canada.     | 16,993                                        | Infection                       | 0-13 days: 14% (0-26%)         |                              |
|  |       |                               |                                        |                                               |                                 | 14-20 days: 43% (30-53%)       |                              |
|  |       |                               |                                        |                                               |                                 | 35-41 days: 75% (63-83%)       |                              |
|  |       |                               |                                        |                                               | Infection                       |                                | ≥21 days: 65% (58-71%)       |
|  |       |                               |                                        |                                               | Infection - non-VOC             |                                | 72% (58-81%)                 |
|  |       |                               |                                        |                                               | Infection - Alpha               |                                | 67% (57-75%)                 |
|  |       |                               |                                        |                                               | Infection - Gamma               |                                | 61% (45-72%)                 |
|  | (250) | Test-negative<br>case-control | 17/1/2021 to<br>5/6/2021<br>Canada.    | 5,8476                                        | Infection                       | ≥14 days: 70.3% (68.1-72.4%)   | ≥7 days: 85.5% (80.4-89.3%)  |
|  | (251) | Case-control                  | 14/2/2021 to<br>3/5/2021<br>France.    | 67,760                                        | Infection                       |                                | ≥7 days: 88% (81-92%)        |
|  |       |                               |                                        |                                               | Infection - Alpha               |                                | ≥7 days: 86% (81-90%)        |
|  |       |                               |                                        |                                               | Infection - Beta/Gamma          |                                | ≥7 days: 77% (63-86%)        |
|  | (252) | Test-negative<br>case-control | 23/3/2021 to<br>7/9/2021<br>Qatar.     | 1 dose:<br>906,078<br>2 doses:<br>877,354     | Infection – Delta               | 65.5% (40.9-79.9%)             | ≥14 days: 59.6% (50.7-66.9%) |
|  |       |                               |                                        |                                               | Severe disease or death - Delta |                                | 97.3% (84.4-99.5%)           |
|  | (192) | Test-negative<br>case-control | 1/1/2021 to<br>5/9/2021<br>Qatar.      | 1 dose:<br>947,035<br><br>2 doses:<br>907,763 | Symptomatic infection           | 0-13 days: -5.5% (-12.9-1.4%)  |                              |
|  |       |                               |                                        |                                               |                                 | ≥14 days: 47.9% (43.6-51.9%)   |                              |
|  |       |                               |                                        |                                               |                                 | 1 month: 81.5% (79.9-83.0%)    |                              |
|  |       |                               |                                        |                                               |                                 | 2 months: 72.5% (69.6-75.1%)   |                              |
|  |       |                               |                                        |                                               |                                 | 3 months: 70.6% (66.4-74.3%)   |                              |
|  |       |                               |                                        |                                               |                                 | 4 months: 57.0% (48.6-64.0%)   |                              |
|  |       |                               |                                        |                                               |                                 | 5 months: 12.0% (-6.1-27.1%)   |                              |
|  |       |                               |                                        |                                               |                                 | 6 months: 12.8% (-9.1-30.3%)   |                              |
|  |       |                               |                                        |                                               |                                 | ≥7 months: 27.8% (-1.4-48.7%)  |                              |
|  |       |                               |                                        |                                               | Hospitalisation and death       | 0-13 days: 7.5% (-11.9-23.6%)  |                              |
|  |       |                               |                                        |                                               |                                 | ≥14 days: 65.0% (55.0-72.8%)   |                              |
|  |       |                               |                                        |                                               |                                 | 1 month: 95.9% (93.6-97.3%)    |                              |
|  |       |                               |                                        |                                               |                                 | 2 months: 96.3% (92.9-98.0%)   |                              |
|  |       |                               |                                        |                                               |                                 | 3 months: 93.4% (87.5-96.5%)   |                              |
|  |       |                               |                                        |                                               |                                 | 4 months: 80.8% (56.9-91.4%)   |                              |
|  |       |                               |                                        |                                               |                                 | 6 months: 81.8% (18.5-95.9%)   |                              |
|  |       |                               |                                        |                                               |                                 | ≥7 months: 44.1% (-86.5-83.3%) |                              |
|  | (253) | Prospective<br>cohort         | 7/12/2020 to<br>5/2/2021<br>UK.        | 23,324                                        | Infection                       | ≥21 days: 70% (55-85%)         | ≥7 days: 85% (74-96%)        |

|    |  |       |                             |                                                                               |                                  |                                                                                                                       |                                                                                                        |
|----|--|-------|-----------------------------|-------------------------------------------------------------------------------|----------------------------------|-----------------------------------------------------------------------------------------------------------------------|--------------------------------------------------------------------------------------------------------|
| 1  |  | (254) | Observational               | 24/1/2021 to 3/4/2021 Israel.                                                 | 186,109                          | Infection                                                                                                             | ≥7 days: 95.3% (94.9-95.7%)                                                                            |
| 2  |  |       |                             |                                                                               |                                  | Asymptomatic infection                                                                                                | ≥7 days: 91.5% (90.7-92.2%)                                                                            |
| 3  |  |       |                             |                                                                               |                                  | Symptomatic infection                                                                                                 | ≥7 days: 97.0% (96.7-97.2%)                                                                            |
| 4  |  |       |                             |                                                                               |                                  | Hospitalisation                                                                                                       | ≥7 days: 97.2% (96.8-97.5%)                                                                            |
| 5  |  |       |                             |                                                                               |                                  | Severe or critical infection                                                                                          | ≥7 days: 97.5% (97.1-97.8%)                                                                            |
| 6  |  |       |                             |                                                                               |                                  | Death                                                                                                                 | ≥7 days: 96.7% (96.0-97.3%)                                                                            |
| 7  |  | (255) | Observational               | 1/3/2021 to 1/8/2021 US.                                                      | 10,428, 783                      | Infection – Pre-Delta period                                                                                          | ≥14 days: 74.2% (68.9-78.7%)                                                                           |
| 8  |  |       |                             |                                                                               |                                  | Infection – Intermediate period                                                                                       | ≥14 days: 66.5% (58.3-73.1%)                                                                           |
| 9  |  |       |                             |                                                                               |                                  | Infection – Delta                                                                                                     | ≥14 days: 52.4% (48.0-56.4%)                                                                           |
| 10 |  | (256) | Observational               | 14/12/2020 to 14/8/2021 US.                                                   | Delta: 2,840<br>Pre-Delta: 7,012 | Infection – Delta                                                                                                     | 14–119 days: 85% (68-93%)<br>120–149 days: 81% (34-95%)<br>≥150 days: 73% (49-86%)                     |
| 11 |  |       |                             |                                                                               |                                  | Infection – Pre-Delta                                                                                                 | 91% (81-96%)                                                                                           |
| 12 |  |       |                             |                                                                               |                                  | [NOTE only 65% of participants in this study received BNT162b2 (33% received mRNA-1273, and 2% received Ad26.COV2.S)] |                                                                                                        |
| 13 |  | (257) | Observational               | 15/1/2021 to 16/4/2021 France.                                                | 378                              | Infection – Beta                                                                                                      | ≥7 days: 49% (14-69%)                                                                                  |
| 14 |  |       |                             |                                                                               |                                  | Severe disease                                                                                                        | ≥7 days: 86% (67-94%)                                                                                  |
| 15 |  | (258) | Observational               | 1/12/2020 to 1/8/2021 UK.                                                     | 384,543                          | Infection – Alpha                                                                                                     | ≥21 days: 59% (52-65%)                                                                                 |
| 16 |  |       |                             |                                                                               |                                  | Infection – Delta                                                                                                     | ≥21 days: 57% (50-63%)                                                                                 |
| 17 |  |       |                             |                                                                               |                                  | Infection – Alpha                                                                                                     | 0-13 days: 77% (66-84%)<br>≥14 days: 78% (68-84%)                                                      |
| 18 |  |       |                             |                                                                               |                                  | Infection – Delta                                                                                                     | 0-13 days: 82% (75-87%)<br>≥14 days: 80% (77-83%)                                                      |
| 19 |  | (259) | Observational               | April to May 2021. Canada                                                     | 224                              | Infection                                                                                                             | 66.2% (2.3-88.3%)                                                                                      |
| 20 |  |       |                             |                                                                               |                                  | Symptomatic infection                                                                                                 | 25.6% (-157.8-78.5%)                                                                                   |
| 21 |  | (260) | Retrospective cohort        | 27/12/2020 to 24/3/2021 Italy.                                                | 6,423                            | Infection                                                                                                             | 0-14 days: 47.3% (24.7-63.1%)<br>14-21 days: 84.1% (39.7-95.8%)<br>≥21 days: 85.4% (-35.3-98.4%)       |
| 22 |  |       |                             |                                                                               |                                  | Symptomatic infection                                                                                                 | 0-14 days: 39.9% (9.1-60.3%)<br>14-21 days: 83.3% (14.8-96.7%)<br>≥21 days: 65.9% (-171-95.7%)         |
| 23 |  | (261) | Randomised controlled trial | 27//7/2020 to 29/10/2020 US, Argentina, Brazil, South Africa, Germany, Turkey | 44,165                           | Infection (without evidence of prior infection)                                                                       | ≥7 days: 91.3% (89-93.2%)                                                                              |
| 24 |  |       |                             |                                                                               |                                  | Infection (with evidence of previous infection)                                                                       | ≥7 days: 91.1% (88.8-93.0%)                                                                            |
| 25 |  |       |                             |                                                                               |                                  | Infection                                                                                                             | <11 days: 18.2% (-26.1-47.3%)<br>≥11 days to second dose: 91.7% (79.6-97.4%)                           |
| 26 |  |       |                             |                                                                               |                                  |                                                                                                                       | <7 days: 91.5% (72.9-98.3%)<br>≥7 days: 91.2% (88.9-93.0%)<br>≥7 days to <2 months: 96.2% (93.3-98.1%) |

|  |       |                      |                                  |         |                                                            |                                       |                                            |
|--|-------|----------------------|----------------------------------|---------|------------------------------------------------------------|---------------------------------------|--------------------------------------------|
|  |       |                      |                                  |         |                                                            |                                       | ≥2 months to <4 months: 90.1% (86.6-92.9%) |
|  |       |                      |                                  |         |                                                            |                                       | ≥4 months: 83.7% (74.7-89.9%)              |
|  | (262) | Retrospective cohort | 20/12/2020 to 25/2/2021 Israel.  | 6,710   | Symptomatic Infection                                      | 7-21 days: 89% (83-94%)               | ≥7 days: 97% (94-99%)                      |
|  |       |                      |                                  |         |                                                            |                                       | ≥21 days: 98% (94-100%)                    |
|  |       |                      |                                  |         | Asymptomatic Infection                                     | 7-21 days: 36% (-51-69%)              | ≥7 days: 86% (69-93%)                      |
|  |       |                      |                                  |         |                                                            |                                       | ≥21 days: 94% (78-98%)                     |
|  | (263) | Cohort               | 27/12/2020 to 28/2/2021 Sweden.  | 805,741 | Infection                                                  | ≥14 days: 42% (14-63%)                | <7 days: 60% (27-81%)                      |
|  |       |                      |                                  |         |                                                            |                                       | ≥7 days: 86% (72-94%)                      |
|  | (264) | Prospective cohort   | 27/12/2020 to 26/5/2021 Spain.   | 28,594  | Infection – Nursing home residents                         | 12 days: 20% (19.76-20.3%)            | 90.89% (90.84-90.95%)                      |
|  |       |                      |                                  |         |                                                            | 40.28% (40.17-40.39)                  |                                            |
|  |       |                      |                                  | 26,238  | Infection – Nursing home staff                             | 12 days: 20.27% (19.8-20.73%)         | 85.02% (84.86-85.17%)                      |
|  |       |                      |                                  |         |                                                            | 26.49% (26.25-26.74%)                 |                                            |
|  |       |                      |                                  | 61,951  | Infection – Healthcare workers                             | 12 days: 15.44% (15.19-15.68%)        | 94% (93.92-94.1%)                          |
|  |       |                      |                                  |         |                                                            | 33.8% (33.66-33.92%)                  |                                            |
|  |       |                      |                                  | 28,594  | Hospital admission - Nursing home residents                | 12 days: 67.59% (65.29-69.75%)        | 95.06% (94.73-95.38%)                      |
|  |       |                      |                                  |         |                                                            | 46.24% (45.62-46.86%)                 |                                            |
|  |       |                      |                                  |         | Death - Nursing home residents                             | 12 days: 43.95% (37.87-49.44%)        | 96.73% (96.43-96.99)                       |
|  |       |                      |                                  |         |                                                            | 51.71% (51.17-52.23%)                 |                                            |
|  | (265) | Cohort               | 27/12/2020 to 11/4/2021 Denmark. | 864,096 | Infection - Prioritised risk groups                        | 0-14 days: -72% (-80- -64%)           | 0-7 days: 42% (33-50%)                     |
|  |       |                      |                                  |         |                                                            | >14 days to second dose: 7% (-1-15%)  | > 7 days: 82% (79-84%)                     |
|  |       |                      |                                  |         | COVID-19-related hospitalisation - Prioritised risk groups | 0-14 days: 54% (44-62%)               | 0-7 days: 90% (80-95%)                     |
|  |       |                      |                                  |         |                                                            | >14 days to second dose: 35% (18-49%) | >7 days: 93% (89-96%)                      |
|  |       |                      |                                  |         | COVID-19-related death - Prioritised risk groups           | 0-14 days: 76% (68-82%)               | >7 days: 94% (90-96%)                      |
|  |       |                      |                                  |         |                                                            | >14 to second dose days: 7% (-15-25%) |                                            |
|  | (266) | Case-control         | 27.1.2021 to 7/2/2021 Spain.     | 268     | Infection                                                  | 52.6% (95%CI: 1.1-77.3)               |                                            |
|  | (267) | Observational        | 15/12/2020 to 3/2/2021 England.  | 170,226 | Infection                                                  | 21-27 days: 55.2% (40.8-66.8%)        |                                            |
|  |       |                      |                                  |         | Emergency hospital attendance                              | 21-27 days: 57.8% (30.8-74.5%)        |                                            |
|  |       |                      |                                  |         | Hospitalisation                                            | 21-27 days: 50.1% (19.9-69.5%)        |                                            |
|  | (268) | Cohort               | 27/12/2020 to 10/3/2021 Spain.   | 299,209 | Infection (without evidence of prior infection)            | 0-14 days: 28.9% (26.9-31%)           |                                            |
|  |       |                      |                                  |         |                                                            | 15-21 days: 51.9% (50.7-53.1%)        |                                            |
|  |       |                      |                                  |         |                                                            | 22-28 days: 62.9% (61.9-64%)          |                                            |
|  |       |                      |                                  |         |                                                            | ≥29 days: 81.8% (81.0-82.7%)          |                                            |
|  |       |                      |                                  |         | Infection (with evidence of prior infection)               | 0-14 days: 9.6% (-6.9-26.8%)          |                                            |
|  |       |                      |                                  |         |                                                            | 15-21 days: 25.5% (15.1-36.6%)        |                                            |
|  |       |                      |                                  |         |                                                            | 22-28 days: 34.6% (25.7-44.1%)        |                                            |

1  
2  
3  
4  
5  
6  
7  
8  
9  
10  
11  
12  
13  
14  
15  
16  
17  
18  
19  
20  
21  
22  
23  
24  
25  
26  
27  
28  
29  
30  
31  
32  
33  
34  
35  
36  
37  
38  
39  
40  
41  
42  
43  
44  
45  
46

|    |  |       |                                   |                                      |                                             |                                                                                              |                                                               |
|----|--|-------|-----------------------------------|--------------------------------------|---------------------------------------------|----------------------------------------------------------------------------------------------|---------------------------------------------------------------|
|    |  |       |                                   |                                      | infection)                                  | ≥29 days: 56.8% (47.1-67.7%)                                                                 |                                                               |
| 1  |  | (269) | Observational                     | 1/12/2020 to 8/5/2021 UK.            | 383,812                                     | Infection                                                                                    | 8-20 days after either dose: 56% (51-61%)                     |
| 2  |  |       |                                   |                                      |                                             |                                                                                              | ≥21 days: 64% (59-68%)                                        |
| 3  |  |       |                                   |                                      |                                             |                                                                                              | ≥21 days: 80% (74-84%)                                        |
| 4  |  |       |                                   |                                      |                                             | [NOTE: Both BNT162b2 and AZD1222 vaccines were included in this study]                       |                                                               |
| 5  |  | (270) | Cohort                            | 19/12/2020 to 14/3/2021 Israel.      | 9,347                                       | Infection                                                                                    | 4-10 days: 28% (-18-57%)                                      |
| 6  |  |       |                                   |                                      |                                             |                                                                                              | ≥11 days after first, ≤10 days after second: 55% (32-70%)     |
| 7  |  |       |                                   |                                      |                                             | Symptomatic infection                                                                        | 4-10 days: 21% (-32-41%)                                      |
| 8  |  |       |                                   |                                      |                                             |                                                                                              | ≥11 days after first, ≤10 days after second: 80% (69-87%)     |
| 9  |  | (271) | Prospective cohort                | 8/12/2020 to 15/3/2021 England.      | 10,412                                      | Infection                                                                                    | 0-6 days: 36% (-6-62%)                                        |
| 10 |  |       |                                   |                                      |                                             |                                                                                              | 7-13 days: 17% (-28-46%)                                      |
| 11 |  |       |                                   |                                      |                                             |                                                                                              | 14-20 days: 4% (-60-43%)                                      |
| 12 |  |       |                                   |                                      |                                             |                                                                                              | 21-27 days: 8% (-59-47%)                                      |
| 13 |  |       |                                   |                                      |                                             |                                                                                              | 28-34 days: 56% (19-76%)                                      |
| 14 |  |       |                                   |                                      |                                             |                                                                                              | 35-48 days: 62% (23-81%)                                      |
| 15 |  |       |                                   |                                      |                                             |                                                                                              | ≥49 days: 51% (-17-80%)                                       |
| 16 |  |       |                                   |                                      |                                             | [NOTE: Both BNT162b2 and AZD1222 vaccines were included in this study]                       |                                                               |
| 17 |  | (272) | Retrospective cohort              | 1/1/2021 to 31/3/2021 US.            | 44,498                                      | Infection                                                                                    | >14 days after first, ≤14 days after second: 78.1% (71.1-82%) |
| 18 |  |       |                                   |                                      |                                             |                                                                                              | >14 days: 96.8% (95.3-97.8%)                                  |
| 19 |  | (273) | Prospective cohort                | 14/12/2020 to 10/4/2021 US.          | 3,975                                       | Infection                                                                                    | ≥14 days after first, <14 days after second: 80% (60-90%)     |
| 20 |  |       |                                   |                                      |                                             |                                                                                              | ≥14 days: 93% (78-98%)                                        |
| 21 |  | (274) | Randomised controlled trial       | 15/10/2020 to 12/1/2021 US.          | 2,260                                       | Infection - Adolescents (12-15 years of age) - (without evidence of prior infection)         | ≥7 days: 100% (75.3-100%)                                     |
| 22 |  |       |                                   |                                      |                                             | Infection - Adolescents (12-15 years of age) - (with or without evidence of prior infection) | ≥7 days: 100% (78.1-100%)                                     |
| 23 |  | (275) | Retrospective cohort              | 19/7/2021 to 13/11/2021 South Korea. | 444,313                                     | Infection – Adolescents (16-18 years of age)                                                 | ≥14 days: 91.1% (89.6-92.5%)                                  |
| 24 |  |       |                                   |                                      |                                             |                                                                                              | ≥14 days: 99.1% (98.5-99.5%)                                  |
| 25 |  | (276) | Prospective cohort                | 25/7/2021 to 4/12/2021 US.           | 243                                         | Infection - Adolescents (12-17 years of age)                                                 | ≥14 days: 92% (79-97%)                                        |
| 26 |  |       |                                   |                                      |                                             |                                                                                              |                                                               |
| 27 |  | (277) | Retrospective longitudinal cohort | 21/12/2020 to 6/2/2021 Israel.       | 5,439,734 first dose, 5,112,516 second dose | Infection                                                                                    | 14-20 days: 54.3% (50.6-57.8%)                                |
| 28 |  |       |                                   |                                      |                                             | Symptomatic infection                                                                        | 14-20 days: 58.3% (54.7-61.6%)                                |
| 29 |  |       |                                   |                                      |                                             | Hospitalisation                                                                              | 14-20 days: 74.5% (69.1-79%)                                  |
| 30 |  |       |                                   |                                      |                                             | Severe/Critical disease                                                                      | 14-20 days: 77.3% (71.2-82.1%)                                |
| 31 |  |       |                                   |                                      |                                             | Death                                                                                        | 14-20 days: 71.7% (64.1-77.7%)                                |
| 32 |  |       |                                   |                                      |                                             | Infection                                                                                    | 8-14 days: 89.9% (88.6-91.1%)                                 |
| 33 |  |       |                                   |                                      |                                             | Symptomatic infection                                                                        | 8-14 days: 93.6% (92.7-94.3%)                                 |
| 34 |  |       |                                   |                                      |                                             | Hospitalisation                                                                              | 8-14 days: 93.8% (91.9-95.2%)                                 |
| 35 |  |       |                                   |                                      |                                             | Severe/Critical disease                                                                      | 8-14 days: 94.4% (92.6-95.8%)                                 |
| 36 |  |       |                                   |                                      |                                             | Death                                                                                        | 8-14 days: 91.3% (87.4-94.0%)                                 |
| 37 |  |       |                                   |                                      |                                             | Infection                                                                                    | 15-21 days: 96.8% (96.1-97.4%)                                |
| 38 |  |       |                                   |                                      |                                             | Symptomatic infection                                                                        | 15-21 days: 98.1% (97.7-98.5%)                                |
| 39 |  |       |                                   |                                      |                                             | Hospitalisation                                                                              | 15-21 days: 98% (97.1-98.6%)                                  |
| 40 |  |       |                                   |                                      |                                             |                                                                                              |                                                               |
| 41 |  |       |                                   |                                      |                                             |                                                                                              |                                                               |
| 42 |  |       |                                   |                                      |                                             |                                                                                              |                                                               |

|  |       |                            |                                                                                                                 |           |                                                                                                  |                                                                                                                                                                                             |
|--|-------|----------------------------|-----------------------------------------------------------------------------------------------------------------|-----------|--------------------------------------------------------------------------------------------------|---------------------------------------------------------------------------------------------------------------------------------------------------------------------------------------------|
|  |       |                            |                                                                                                                 |           | Severe/Critical disease                                                                          | 15-21 days: 98.6% (97.8-99.1%)                                                                                                                                                              |
|  |       |                            |                                                                                                                 |           | Death                                                                                            | 15-21 days: 97.7% (95.9-98.7%)                                                                                                                                                              |
|  |       |                            |                                                                                                                 |           | Infection                                                                                        | 22-28 days: 97.3% (96.7-97.8%)                                                                                                                                                              |
|  |       |                            |                                                                                                                 |           | Symptomatic infection                                                                            | 22-28 days: 97.9% (97.4-98.3%)                                                                                                                                                              |
|  |       |                            |                                                                                                                 |           | Hospitalisation                                                                                  | 22-28 days: 99% (98.4-99.3%)                                                                                                                                                                |
|  |       |                            |                                                                                                                 |           | Severe/Critical disease                                                                          | 22-28 days: 99.2% (98.6-99.5%)                                                                                                                                                              |
|  |       |                            |                                                                                                                 |           | Death                                                                                            | 22-28 days: 98.6% (97-99.3%)                                                                                                                                                                |
|  | (278) | Test-negative case-control | January to March 2021 US.                                                                                       | 1,843     | Infection                                                                                        | ≥14 days: 81.7% (74.3-86.9%)<br>≤2 days: 81.7% (74.3-86.9%)<br>3-6 days: 81.7% (74.3-86.9%)<br>≥7 days: 93.5% (86.5-96.9%)                                                                  |
|  |       |                            |                                                                                                                 |           | [NOTE: 76% of case-patients and 78% of controls received BNT162b2, remainder received mRNA-1273] |                                                                                                                                                                                             |
|  | (279) | Prospective cohort         | January to April 2021 Spain.                                                                                    | 20,961    | Infection                                                                                        | 21% (3-36%)<br>65% (56-73%)                                                                                                                                                                 |
|  |       |                            |                                                                                                                 |           | Symptomatic infection                                                                            | 30% (10-45%)<br>82% (73-88%)                                                                                                                                                                |
|  |       |                            |                                                                                                                 |           | Symptomatic infection – 18-59 years old                                                          | 50% (12-72%)<br>85% (74-91%)                                                                                                                                                                |
|  |       |                            |                                                                                                                 |           | Symptomatic infection - ≥60 years old                                                            | 20% (-7-40%)<br>76% (55-87%)                                                                                                                                                                |
|  |       |                            |                                                                                                                 |           | Hospitalisation                                                                                  | 65% (25-83%)<br>94% (60-99%)                                                                                                                                                                |
|  | (280) | Prospective cohort         | 8/10/2020 to 22/2/2021 Scotland.                                                                                | 409,588   | Hospitalisation                                                                                  | 0-6 days: 86% (81-90%)<br>7-13 days: 53% (45-59%)<br>14-20 days: 69% (62-75%)<br>21-27 days: 78% (71-83%)<br>28-34 days: 91% (85-94%)<br>35-41 days: 78% (69-85%)<br>≥42 days: 77% (68-83%) |
|  | (281) | Test-negative case-control | 27/12/2020 to 30/6/2021 Belgium, Croatia, Czechia, France, Greece, Ireland, Luxembourg, Malta, Portugal, Spain. | 1,893     | Infection                                                                                        | ≥14 days: 76% (61-86%)<br>≥14 days: 94% (88-97%)                                                                                                                                            |
|  | (282) | Prospective cohort         | 1/5/2021 to 3/9/2021 US.                                                                                        | 8,690,825 | Infection - 18-49 years old                                                                      | ≥14 days: 93.3% (92.2-94.4%)                                                                                                                                                                |
|  |       |                            |                                                                                                                 |           | Infection - 50-64 years old                                                                      | ≥14 days: 95.0% (94.0-96.0%)                                                                                                                                                                |
|  |       |                            |                                                                                                                 |           | Infection - ≤65 years old                                                                        | ≥14 days: 91.4% (90.0-92.8%)                                                                                                                                                                |
|  |       |                            |                                                                                                                 |           | Hospitalisation - 18-49 years old                                                                | ≥14 days: 96.1% (94.1-97.6%)                                                                                                                                                                |
|  |       |                            |                                                                                                                 |           | Hospitalisation - 50-64 years old                                                                | ≥14 days: 95.6% (94.2-96.7%)                                                                                                                                                                |
|  |       |                            |                                                                                                                 |           | Hospitalisation - ≤65 years old                                                                  | ≥14 days: 94.8% (94.0-95.5%)                                                                                                                                                                |
|  | (283) | Test-negative case-control | 1/7/2021 to 25/10/2021 US.                                                                                      | 1,222     | Hospitalisation 12-18 years old                                                                  | 97% (86-100%)<br>≥14 days: 94% (90-96%)                                                                                                                                                     |
|  |       |                            |                                                                                                                 |           | ICU admission – 12-18 years old                                                                  | ≥14 days: 98% (93-99%)                                                                                                                                                                      |
|  |       |                            |                                                                                                                 |           | Life support – 12-18 years old                                                                   | ≥14 days: 98% (92-100%)                                                                                                                                                                     |



|                                                                                                      |                                                                                                       |       |                             |                                      |         |                                                              |                                           |                          |
|------------------------------------------------------------------------------------------------------|-------------------------------------------------------------------------------------------------------|-------|-----------------------------|--------------------------------------|---------|--------------------------------------------------------------|-------------------------------------------|--------------------------|
|                                                                                                      |                                                                                                       | (284) | Test-negative case-control  | 1/7/2021 to 9/12/2021 US.            | 283     | COVID-19 multisystem inflammatory syndrome – 12-18 years old |                                           | ≥14 days: 92% (77-97%)   |
| <b>Oxford University/ AstraZeneca (AZD1222)</b> - Non-replicating adenovirus viral vector (ChAdOx1). | Two doses (0.5ml each) intramuscularly (deltoid) with a recommended interval window of 8 to 12 weeks. | (242) | Test-negative case-control  | 26/10/2020 to 16/5/2021 UK.          | 19,109  | Infection - Alpha                                            | 48.7% (45.2–51.9%)                        | 74.5% (68.4–79.4%)       |
|                                                                                                      |                                                                                                       |       |                             |                                      |         | Infection - Delta                                            | 30.0% (24.3–35.3%)                        | 67.0% (61.3–71.8%)       |
|                                                                                                      |                                                                                                       | (245) | Test-negative case-control  | 14/12/2020 to 3/8/2021 Canada.       | 682,071 | Symptomatic infection - Alpha                                | 64% (60-68%)                              |                          |
|                                                                                                      |                                                                                                       |       |                             |                                      |         | Symptomatic infection – Beta or Gamma                        | 48% (28-63%)                              |                          |
|                                                                                                      |                                                                                                       |       |                             |                                      |         | Symptomatic infection - Delta                                | 67% (44-80%)                              |                          |
|                                                                                                      |                                                                                                       |       |                             |                                      |         | Hospitalisation or death - Alpha                             | 85% (81-88%)                              |                          |
|                                                                                                      |                                                                                                       |       |                             |                                      |         | Hospitalisation or death – Bet or Gamma                      | 83% (66-92%)                              |                          |
|                                                                                                      |                                                                                                       |       |                             |                                      |         | Hospitalisation or death - Delta                             | 88% (60-96%)                              |                          |
|                                                                                                      |                                                                                                       | (133) | Test-negative observational | 1/4/2021 to 6/6/2021 Scotland.       | 462,755 | Infection with Alpha variant                                 |                                           | 73% (66-78%)             |
|                                                                                                      |                                                                                                       |       |                             |                                      |         | Infection with Delta variant                                 |                                           | 60% (53-66%)             |
|                                                                                                      |                                                                                                       | (285) | Randomised controlled trial | 1/10/2020 to 14/1/2021 UK.           | 8,534   | Symptomatic infection – Alpha                                |                                           | 70.4% (43.6-84%)         |
|                                                                                                      |                                                                                                       |       |                             |                                      |         | Symptomatic infection – non-Alpha                            |                                           | 81.5% (67.9-89.4%)       |
|                                                                                                      |                                                                                                       | (286) | Randomised controlled trial | 28/8/2020 to 5/3/2021 US.            | 32,449  | Symptomatic infection                                        |                                           | 79%                      |
|                                                                                                      |                                                                                                       |       |                             |                                      |         | Severe disease or hospitalisation                            |                                           | 100%                     |
|                                                                                                      |                                                                                                       | (247) | Test-negative case-control  | 12/4/2021 to 4/6/2021 England.       | 14,019  | Hospitalisation – Alpha                                      | 76% (61-85%)                              | 86% (53-96%)             |
|                                                                                                      |                                                                                                       |       |                             |                                      |         | Hospitalisation – Delta                                      | 71% (51-83%)                              | 92% (75-97%)             |
|                                                                                                      |                                                                                                       | (287) | Randomised controlled trial | 23/4/2020 to 4/11/2020 UK, Brazil.   | 11,636  | Infection                                                    |                                           | 62.1% (41.0-75.7%)       |
|                                                                                                      |                                                                                                       | (288) | Randomised controlled trial | 24/6/2020 to 9/11/2020 South Africa. | 2,026   | Symptomatic infection                                        |                                           | 21.9% (-49.9-59.8%)      |
|                                                                                                      |                                                                                                       |       |                             |                                      |         | Symptomatic infection - Beta                                 |                                           | 10.4% (-76.8-54.8%)      |
|                                                                                                      |                                                                                                       | (248) | Test-negative case-control  | 8/12/2020 to 19/2/2021. England.     | 156,930 | Symptomatic infection                                        |                                           | 28-34 days: 60% (41-73%) |
|                                                                                                      |                                                                                                       |       |                             |                                      |         |                                                              |                                           | ≥35 days: 73% (27-90%)   |
|                                                                                                      |                                                                                                       | (258) | Observational               | 1/12/2020 to 1/8/2021 UK.            | 384,543 | Infection - Alpha                                            | ≥21 days: 63% (55–69%)                    | 0-13 days: 72% (50-84%)  |
|                                                                                                      |                                                                                                       |       |                             |                                      |         |                                                              |                                           | ≥14 days: 79% (56–90%)   |
|                                                                                                      |                                                                                                       |       |                             |                                      |         | Infection Delta                                              | ≥21 days: 46% (35–55%)                    | 0-13 days: 71% (64–77%)  |
|                                                                                                      |                                                                                                       |       |                             |                                      |         |                                                              |                                           | ≥14 days: 67% (62–71%)   |
|                                                                                                      |                                                                                                       | (289) | Test-negative case-control  | 1/3/2021 to 31/5/2021 India          | 720     | Infection                                                    | 49% (17-68%)                              | 54% (27-71%)             |
|                                                                                                      |                                                                                                       |       |                             |                                      |         | Symptomatic infection                                        | 58% (28-75%)                              | 64% (38-78%)             |
|                                                                                                      |                                                                                                       |       |                             |                                      |         | Moderately severe disease                                    | Any dosage >3 weeks ago: 95% (44-100%)    |                          |
|                                                                                                      |                                                                                                       | (269) | Observational               | 1/12/2020 to 8/5/2021 UK.            | 383,812 | Infection                                                    | 8-20 days after either dose: 56% (51-61%) |                          |
|                                                                                                      |                                                                                                       |       |                             |                                      |         |                                                              | ≥21 days: 64% (59-68%)                    | ≥21 days: 80% (74-84%)   |

[NOTE: Both BNT162b2 and AZD1222 vaccines were included in this study]

|                                                                                                                                                                                                                                                 |              |                                                                      |                               |                                                     |        |                                                                           |                         |                                 |  |
|-------------------------------------------------------------------------------------------------------------------------------------------------------------------------------------------------------------------------------------------------|--------------|----------------------------------------------------------------------|-------------------------------|-----------------------------------------------------|--------|---------------------------------------------------------------------------|-------------------------|---------------------------------|--|
| 1<br>2<br>3<br>4<br>5<br>6<br>7<br>8<br>9<br>10<br>11<br>12<br>13<br>14<br>15<br>16<br>17<br>18<br>19<br>20<br>21<br>22<br>23<br>24<br>25<br>26<br>27<br>28<br>29<br>30<br>31<br>32<br>33<br>34<br>35<br>36<br>37<br>38<br>39<br>40<br>41<br>42 |              | (290)                                                                | Randomised controlled trial   | 28/8/2020 to 15/1/2021<br>US, Chile, Peru.          | 32,451 | Symptomatic infection                                                     |                         | ≥15 days: 74.0% (65.3-80.5%)    |  |
|                                                                                                                                                                                                                                                 |              |                                                                      |                               |                                                     |        | Severe or critical infection                                              |                         | ≥15 days: 100.0% (71.6-NE%)     |  |
|                                                                                                                                                                                                                                                 |              |                                                                      |                               |                                                     |        | Emergency department visit                                                |                         | ≥15 days: 94.8% (59.0-99.3%)    |  |
|                                                                                                                                                                                                                                                 |              |                                                                      |                               |                                                     |        | Hospitalisation                                                           |                         | ≥15 days: 94.2% (53.3-99.3%)    |  |
|                                                                                                                                                                                                                                                 |              |                                                                      |                               |                                                     |        | ICU admission                                                             |                         | ≥15 days: 100.0 (-1781.6-NE%)   |  |
|                                                                                                                                                                                                                                                 |              | (291)                                                                | Clinical trial                | 23/6/2020 to 1/12/2020<br>Brazil.                   | 9433   | Infection – B.1.1.33                                                      |                         | 88.2 (5.4, 98.5)                |  |
|                                                                                                                                                                                                                                                 |              |                                                                      |                               |                                                     |        | Infection – B.1.1.28                                                      |                         | 72.6% (46.4-86.0%)              |  |
|                                                                                                                                                                                                                                                 |              |                                                                      |                               |                                                     |        | Infection – Zeta                                                          |                         | 68.7% (54.9-78.3%)              |  |
|                                                                                                                                                                                                                                                 |              |                                                                      |                               |                                                     |        | Infection – Gamma                                                         |                         | 63.6% (-2.1-87.0%)              |  |
|                                                                                                                                                                                                                                                 |              |                                                                      |                               |                                                     |        | Infection – Undetermined variant                                          |                         | 56.6% (28.2-73.8%)              |  |
|                                                                                                                                                                                                                                                 |              |                                                                      |                               |                                                     |        | Hospitalisation – Any variant                                             |                         | 95% (61-99%)                    |  |
|                                                                                                                                                                                                                                                 |              | (292)                                                                | Meta-analysis                 | 23/4/2020 to 6/12/2020<br>UK, Brazil, South Africa. | 17,178 | Asymptomatic infection                                                    |                         | ≥14 days: 22.2% (-9.9-45%)      |  |
|                                                                                                                                                                                                                                                 |              |                                                                      |                               |                                                     |        | Symptomatic infection                                                     |                         | ≥14 days: 66.7% (57.4-74%)      |  |
|                                                                                                                                                                                                                                                 |              |                                                                      |                               |                                                     |        | Asymptomatic infection - <6 weeks prime-boost interval (standard doses)   |                         | ≥14 days: -11.8% (-189.5-56.8%) |  |
|                                                                                                                                                                                                                                                 |              |                                                                      |                               |                                                     |        | Asymptomatic infection - 6-8 weeks prime-boost interval (standard doses)  |                         | ≥14 days: -74.2% (-330.3-29.5%) |  |
|                                                                                                                                                                                                                                                 |              |                                                                      |                               |                                                     |        | Asymptomatic infection – 9-11 weeks prime-boost interval (standard doses) |                         | ≥14 days: 39.9% (-62.3-77.8%)   |  |
|                                                                                                                                                                                                                                                 |              |                                                                      |                               |                                                     |        | Asymptomatic infection - ≥12 weeks prime-boost interval (standard doses)  |                         | ≥14 days: 22.8% (-63.3-63.5%)   |  |
|                                                                                                                                                                                                                                                 |              |                                                                      |                               |                                                     |        | Symptomatic infection - <6 weeks prime-boost interval (standard doses)    |                         | ≥14 days: 55.1% (33-69.9%)      |  |
|                                                                                                                                                                                                                                                 |              |                                                                      |                               |                                                     |        | Symptomatic infection - 6-8 weeks prime-boost interval (standard doses)   |                         | ≥14 days: 59.9% (32-76.4%)      |  |
|                                                                                                                                                                                                                                                 |              |                                                                      |                               |                                                     |        | Symptomatic infection – 9-11 weeks prime-boost interval (standard doses)  |                         | ≥14 days: 63.7% (28-81.7%)      |  |
|                                                                                                                                                                                                                                                 |              |                                                                      |                               |                                                     |        | Symptomatic infection - ≥12 weeks prime-boost interval (standard doses)   |                         | ≥14 days: 81.3% (60.3-91.2%)    |  |
|                                                                                                                                                                                                                                                 |              | (293)                                                                | Cross-sectional observational | 1/5/2021 to 31/5/2021<br>India.                     | 583    | Infection                                                                 | <14 days: 15% (-68-57%) | <14 days: 66% (34-81%)          |  |
|                                                                                                                                                                                                                                                 |              |                                                                      |                               |                                                     |        |                                                                           | ≥14 days: 44% (7-66%)   | ≥14 days: 83% (73-89%)          |  |
|                                                                                                                                                                                                                                                 |              |                                                                      |                               |                                                     |        | Hospitalisation                                                           | <14 days: 43% (-68-81%) | <14 days: 83% (17-96%)          |  |
|                                                                                                                                                                                                                                                 |              |                                                                      |                               |                                                     |        |                                                                           | ≥14 days: 76% (21-92%)  | ≥14 days: 88% (55-97%)          |  |
|                                                                                                                                                                                                                                                 |              |                                                                      |                               |                                                     |        | ICU admission or death                                                    | <14 days: 62% (-27-89%) | <14 days: 93% (35-99%)          |  |
|                                                                                                                                                                                                                                                 |              | ≥14 days: 53% 9-29-83%)                                              | ≥14 days: 93% (64-99%)        |                                                     |        |                                                                           |                         |                                 |  |
|                                                                                                                                                                                                                                                 |              | [NOTE: Participants either received Covaxin or Covishield (AZD1222)] |                               |                                                     |        |                                                                           |                         |                                 |  |
|                                                                                                                                                                                                                                                 |              | (279)                                                                | Prospective cohort            | January to April 2021<br>Spain.                     | 20,961 | Infection                                                                 | 44% (31-54%)            |                                 |  |
| Symptomatic infection                                                                                                                                                                                                                           | 50% (37-61%) |                                                                      |                               |                                                     |        |                                                                           |                         |                                 |  |
| Symptomatic infection – 18-59 years old                                                                                                                                                                                                         | 50% (34-62%) |                                                                      |                               |                                                     |        |                                                                           |                         |                                 |  |
| Symptomatic infection - ≥60 years old                                                                                                                                                                                                           | 53% (19-72%) |                                                                      |                               |                                                     |        |                                                                           |                         |                                 |  |
| Hospitalisation                                                                                                                                                                                                                                 | 92% (46-99%) |                                                                      |                               |                                                     |        |                                                                           |                         |                                 |  |

43  
44  
45  
46

|  |                                                                                                              |       |                             |                                                                                            |                                 |                                                                                      |                               |                               |                                 |  |
|--|--------------------------------------------------------------------------------------------------------------|-------|-----------------------------|--------------------------------------------------------------------------------------------|---------------------------------|--------------------------------------------------------------------------------------|-------------------------------|-------------------------------|---------------------------------|--|
|  |                                                                                                              | (294) | Retrospective cohort        | 1/6/2020 to 31/5/2021 India.                                                               | 11,405                          | Infection (with evidence of prior infection)                                         |                               | ≥14 days: 91.1% (84.1-94.9%)  |                                 |  |
|  |                                                                                                              |       |                             |                                                                                            |                                 | Infection (without evidence of prior infection)                                      |                               | ≥14 days: 31.8% (23.5-39.1%)  |                                 |  |
|  |                                                                                                              |       |                             |                                                                                            |                                 | [NOTE: 5.77% of participants received Covaxin, 94.23% received Covishield (AZD1222)] |                               |                               |                                 |  |
|  |                                                                                                              | (280) | Prospective cohort          | 8/10/2020 to 22/2/2021 Scotland                                                            | 409,588                         | Hospitalisation                                                                      | 0-6 days: 72% (66-77%)        |                               |                                 |  |
|  |                                                                                                              |       |                             |                                                                                            |                                 |                                                                                      | 7-13 days: 68% (61-73%)       |                               |                                 |  |
|  |                                                                                                              |       |                             |                                                                                            |                                 |                                                                                      | 14-20 days: 73% (66-79%)      |                               |                                 |  |
|  |                                                                                                              |       |                             |                                                                                            |                                 |                                                                                      | 21-27 days: 81% (72-87%)      |                               |                                 |  |
|  |                                                                                                              |       |                             |                                                                                            |                                 |                                                                                      | 28-34 days: 88% (75-94%)      |                               |                                 |  |
|  |                                                                                                              |       |                             |                                                                                            |                                 |                                                                                      | 35-41 days: 97% (63-100%)     |                               |                                 |  |
|  |                                                                                                              |       |                             |                                                                                            |                                 | ≥42 days: 59% (-296-96%)                                                             |                               |                               |                                 |  |
|  |                                                                                                              | (295) | Cohort                      | 17/1/2021 to 11/5/2021 Brazil.                                                             | 313,328                         | Death                                                                                | ≥21 days: 94.4% (93.9-94.8%)  | ≥21 days: 99.8 (99.6-99.9%)   |                                 |  |
|  |                                                                                                              |       |                             |                                                                                            |                                 | Death – 75-79 years old                                                              | ≥21 days: 88% (85.8-90%)      |                               |                                 |  |
|  |                                                                                                              |       |                             |                                                                                            |                                 | Death – 80-89 years old                                                              | ≥21 days: 96.8% (96.5-97.2%)  |                               |                                 |  |
|  |                                                                                                              |       |                             |                                                                                            |                                 | Death - ≥90 years old                                                                | ≥21 days: 99.2% (99.1-99.4%)  |                               |                                 |  |
|  |                                                                                                              | (296) | Retrospective cohort        | 18/1/2021 to 30/6/2021 Brazil.                                                             | 60,577, 870                     | Infection                                                                            | ≥14 days: 34% (33.2-34.7%)    | 0-13 days: 56.9% (55.3-58.5%) |                                 |  |
|  |                                                                                                              |       |                             |                                                                                            |                                 |                                                                                      |                               | ≥14 days: 70% (68.6-71.3%)    |                                 |  |
|  |                                                                                                              |       |                             |                                                                                            |                                 | Hospitalisation                                                                      | ≥14 days: 52.2% (50.9-53.4%)  | 0-13 days: 69.6% (67.2-71.8%) |                                 |  |
|  |                                                                                                              |       |                             |                                                                                            |                                 |                                                                                      |                               | ≥14 days: 86.8% (85.2-88.2%)  |                                 |  |
|  |                                                                                                              |       |                             |                                                                                            |                                 | ICU admission                                                                        | ≥14 days: 54% (51.8-56%)      | 0-13 days: 69.2% (65-72.8%)   |                                 |  |
|  |                                                                                                              |       |                             |                                                                                            |                                 |                                                                                      |                               | ≥14 days: 88.1% (85.4-90.3%)  |                                 |  |
|  |                                                                                                              |       |                             |                                                                                            |                                 | Death                                                                                | ≥14 days: 49.3% (47-51.5%)    | 0-13 days: 72.1% (69.1-74.9%) |                                 |  |
|  |                                                                                                              |       |                             |                                                                                            |                                 |                                                                                      |                               | ≥14 days: 90.2% (88.3-91.8%)  |                                 |  |
|  |                                                                                                              |       |                             |                                                                                            |                                 |                                                                                      |                               |                               |                                 |  |
|  | Johnson & Johnson (Ad26.COV2.S) - Recombinant, replication-incompetent adenovirus serotype 26 (Ad26) vector. | (172) | Randomised controlled trial | 21/9/2020 to 22/1/2021 Argentina, Brazil, Chile, Colombia, Mexico, Peru, South Africa, US. | 39,321                          | Moderate to severe-critical infection                                                | ≥14 days: 66.9% (59.0-73.4%)  |                               |                                 |  |
|  |                                                                                                              |       |                             |                                                                                            |                                 |                                                                                      | ≥28 days: 66.1% (55.0-74.8%)  |                               |                                 |  |
|  |                                                                                                              |       |                             |                                                                                            |                                 |                                                                                      | Severe-critical infection     | ≥14 days: 76.7% (54.6-89.1%)  |                                 |  |
|  |                                                                                                              |       |                             |                                                                                            |                                 |                                                                                      |                               | ≥28 days: 85.4% (54.2-96.9%)  |                                 |  |
|  |                                                                                                              | (297) | Test-negative case-control  | 25/6/2021 to 30/9/2021 Brazil.                                                             | 11,817                          | Symptomatic infection                                                                | 14-27 days: 27.4% (8.7-42.7%) |                               |                                 |  |
|  |                                                                                                              |       |                             |                                                                                            |                                 |                                                                                      |                               | ≥28 days: 50.9% (35.5-63.0%)  |                                 |  |
|  |                                                                                                              |       |                             |                                                                                            |                                 |                                                                                      |                               | Hospitalisation               | 14-27 days: 33.5% (-29.1-69.8%) |  |
|  |                                                                                                              |       |                             |                                                                                            |                                 |                                                                                      |                               |                               | ≥28 days: 72.9% (35.1-91.1%)    |  |
|  |                                                                                                              |       |                             |                                                                                            |                                 |                                                                                      |                               | Admission to an ICU           | 14-27 days: 56.0% (-52.8-93.1%) |  |
|  |                                                                                                              |       |                             |                                                                                            |                                 |                                                                                      |                               |                               | ≥28 days: 92.5% (54.9-99.6%)    |  |
|  |                                                                                                              |       | Mechanical ventilation      | 14-27 days: 65.2% (-74.7-98.1%)                                                            |                                 |                                                                                      |                               |                               |                                 |  |
|  |                                                                                                              |       |                             | ≥28 days: 88.7% (17.9-99.5%)                                                               |                                 |                                                                                      |                               |                               |                                 |  |
|  |                                                                                                              |       |                             |                                                                                            | 14-27 days: 48.9% (-92.3-92.5%) |                                                                                      |                               |                               |                                 |  |

|                                   |                                                                                                               |                                                                                                             |                            |                                |                                     |                               |                                       |                              |                              |                             |                            |
|-----------------------------------|---------------------------------------------------------------------------------------------------------------|-------------------------------------------------------------------------------------------------------------|----------------------------|--------------------------------|-------------------------------------|-------------------------------|---------------------------------------|------------------------------|------------------------------|-----------------------------|----------------------------|
|                                   |                                                                                                               |                                                                                                             |                            |                                |                                     | Death                         | ≥28 days: 90.5% (31.5-99.6%)          |                              |                              |                             |                            |
|                                   |                                                                                                               | (298)                                                                                                       | Retrospective case-control | 27/2/2021 to 14/4/2021 US.     | 126,572                             | Symptomatic infection         | ≥1 day: 50.6% (14.0-74.0%)            |                              |                              |                             |                            |
|                                   |                                                                                                               |                                                                                                             |                            |                                |                                     |                               | ≥8 days: 65.5% (23.3-87.5%)           |                              |                              |                             |                            |
|                                   |                                                                                                               |                                                                                                             |                            |                                |                                     |                               | ≥15 days: 76.7% (30.3-95.3%)          |                              |                              |                             |                            |
|                                   |                                                                                                               | (299)                                                                                                       | Test-negative case-control | 1/7/2021 to 31/7/2021 US.      | 1,000                               | Symptomatic infection         | 51% (95% CI: -2-76%)                  |                              |                              |                             |                            |
|                                   |                                                                                                               | (256)                                                                                                       | Observational              | 14/12/2020 to 14/8/2021 US.    | Delta: 2,840<br>Pre-Delta: 7,012    | Infection – Delta             | 14–119 days: 85% (68-93%)             |                              |                              |                             |                            |
|                                   |                                                                                                               |                                                                                                             |                            |                                |                                     |                               |                                       | 120–149 days: 81% (34-95%)   |                              |                             |                            |
|                                   |                                                                                                               |                                                                                                             |                            |                                |                                     |                               |                                       |                              |                              | ≥150 days: 73% (49-86%)     |                            |
|                                   |                                                                                                               |                                                                                                             |                            |                                |                                     |                               |                                       |                              | Infection – Pre-Delta        | 91% (81-96%)                |                            |
|                                   |                                                                                                               | [NOTE: 2% of study participants received Ad26.COVS.2.S (65% received BNT162b2, and 33% received mRNA-1273)] |                            |                                |                                     |                               |                                       |                              |                              |                             |                            |
|                                   |                                                                                                               | (300)                                                                                                       | Cohort                     | March to July 2021 US.         | 1,914,670                           | Infection                     | 79% (77-80%)                          |                              |                              |                             |                            |
|                                   |                                                                                                               |                                                                                                             |                            |                                |                                     |                               | Hospitalisation                       | 81% (79-84%)                 |                              |                             |                            |
|                                   |                                                                                                               | (301)                                                                                                       | Retrospective cohort       | 27/2/2021 to 22/7/2021 US.     | 97,787                              | Infection                     | ≥1 day: 73.6% (65.9-79.9%)            |                              |                              |                             |                            |
|                                   |                                                                                                               |                                                                                                             |                            |                                |                                     |                               |                                       | ≥8 days: 72.9% (64.2-79.9%)  |                              |                             |                            |
|                                   |                                                                                                               |                                                                                                             |                            |                                |                                     |                               |                                       | ≥15 days: 74.2% (64.9-81.6%) |                              |                             |                            |
|                                   |                                                                                                               | (282)                                                                                                       | Prospective cohort         | 1/5/2021 to 3/9/2021 US.       | 8,690,825                           | Infection - 18-49 years old   |                                       | ≥14 days: 89% (86.5-91.5%)   |                              |                             |                            |
|                                   |                                                                                                               |                                                                                                             |                            |                                |                                     |                               | Infection - 50-64 years old           |                              | ≥14 days: 86.1% (82.5-89.6%) |                             |                            |
|                                   |                                                                                                               |                                                                                                             |                            |                                |                                     |                               | Infection - ≤65 years old             |                              | ≥14 days: 80.8% (75.2-86.5%) |                             |                            |
|                                   |                                                                                                               |                                                                                                             |                            |                                |                                     |                               | Hospitalisation - 18-49 years old     |                              | ≥14 days: 95.7% (91.1-98.3%) |                             |                            |
|                                   |                                                                                                               |                                                                                                             |                            |                                |                                     |                               | Hospitalisation - 50-64 years old     |                              | ≥14 days: 87.5% (82.4-91.4%) |                             |                            |
|                                   |                                                                                                               |                                                                                                             |                            |                                |                                     |                               | Hospitalisation - ≤65 years old       |                              | ≥14 days: 85.2% (81.1-88.6%) |                             |                            |
|                                   |                                                                                                               |                                                                                                             |                            |                                |                                     |                               |                                       |                              |                              |                             |                            |
| <b>Moderna (mRNA-1273) - mRNA</b> | Two doses (100µg, 0.5ml each) intramuscularly (deltoid) with a recommended interval of 28 days between doses. | (245)                                                                                                       | Test-negative case-control | 14/12/2020 to 3/8/2021 Canada. | 682,071                             | Symptomatic infection – Alpha | ≥14 days: 83% (80-86%)                | ≥7 days: 92% (86-96%)        |                              |                             |                            |
|                                   |                                                                                                               |                                                                                                             |                            |                                |                                     |                               | Symptomatic infection – Beta or Gamma | ≥14 days: 77% (63-86%)       |                              |                             |                            |
|                                   |                                                                                                               |                                                                                                             |                            |                                |                                     |                               | Symptomatic infection – Delta         | ≥14 days: 72% (57-82%)       |                              |                             |                            |
|                                   |                                                                                                               |                                                                                                             |                            |                                |                                     |                               | Hospitalisation - Alpha               | ≥14 days: 79% (74-83%)       | ≥7 days: 94% (89-97%)        |                             |                            |
|                                   |                                                                                                               |                                                                                                             |                            |                                |                                     |                               | Hospitalisation – Beta or Gamma       | ≥14 days: 89% (73-95%)       |                              |                             |                            |
|                                   |                                                                                                               |                                                                                                             |                            |                                | Hospitalisation - Delta             | ≥14 days: 96% (72-99%)        |                                       |                              |                              |                             |                            |
|                                   |                                                                                                               |                                                                                                             | (246)                      | Retrospective case-control     | January to July 2021 US.            | 60,083                        | Infection                             |                              | ≥14 days: 86% (81-90.6%)     |                             |                            |
|                                   |                                                                                                               |                                                                                                             |                            |                                |                                     |                               |                                       | Hospitalisation              |                              | ≥14 days: 91.6% (81-97%)    |                            |
|                                   |                                                                                                               |                                                                                                             |                            |                                |                                     |                               |                                       |                              | Admission to an ICU          |                             | ≥14 days: 93.3% (57-99.8%) |
|                                   |                                                                                                               |                                                                                                             |                            | (250)                          | Test-negative case-control          | 17/1/2021 to 5/6/2021 Canada. | 5,8476                                | Infection                    | ≥14 days: 68.7% (59.5-75.9%) | ≥7 days: 84.1% (34.9-96.1%) |                            |
|                                   |                                                                                                               | (252)                                                                                                       | Test-negative case-control | 23/3/2021 to 7/9/2021 Qatar.   | 1 dose: 490,828<br>2 doses: 409,041 | Infection - Delta             | ≥14 days: 79.7% (60.8-89.5%)          | ≥14 days: 86.1% (78.0-91.3%) |                              |                             |                            |
|                                   |                                                                                                               | (255)                                                                                                       | Observational              | 1/3/2021 to                    | 10,428,                             | Infection – Pre-Delta period  |                                       | ≥14 days: 74.7% (66.2-81.1%) |                              |                             |                            |

|  |       |                             |                                |                                  |                                                                                                           |                                                                 |
|--|-------|-----------------------------|--------------------------------|----------------------------------|-----------------------------------------------------------------------------------------------------------|-----------------------------------------------------------------|
|  |       |                             | 1/8/2021 US.                   | 783                              | Infection – Intermediate period                                                                           | ≥14 days: 70.4% (60.1-78.0%)                                    |
|  |       |                             |                                |                                  | Infection – Delta                                                                                         | ≥14 days: 50.6% (45.0-55.7%)                                    |
|  | (256) | Observational               | 14/12/2020 to 14/8/2021 US.    | Delta: 2,840<br>Pre-Delta: 7,012 | Infection – Delta                                                                                         | 14–119 days: 85% (68-93%)                                       |
|  |       |                             |                                |                                  |                                                                                                           | 120–149 days: 81% (34-95%)                                      |
|  |       |                             |                                |                                  |                                                                                                           | ≥150 days: 73% (49-86%)                                         |
|  |       |                             |                                |                                  | Infection – Pre-Delta                                                                                     | 91% (81-96%)                                                    |
|  |       |                             |                                |                                  | [NOTE: 33% of study participants received mRNA-1273 (2% received Ad26.COV2.S, and 65% received BNT162b2)] |                                                                 |
|  | (258) | Observational               | 1/12/2020 to 1/8/2021 UK.      | 384,543                          | Infection - Delta                                                                                         | 75% (64-83%)                                                    |
|  | (259) | Observational               | April to May 2021. Canada      | 124                              | Infection                                                                                                 | 52.5% (26.9-69.1%)                                              |
|  |       |                             |                                |                                  | Symptomatic infection                                                                                     | 65.6% (33.8-82.1%)                                              |
|  |       |                             |                                |                                  | Severe infection                                                                                          | 78.6% (47.9-91.2%)                                              |
|  | (272) | Retrospective cohort        | 1/1/2021 to 31/3/2021 US.      | 4,722                            | Infection                                                                                                 | >14 days after first, ≤14 days after second: 91.2% (80.6-96.1%) |
|  |       |                             |                                |                                  |                                                                                                           | >14 days: 98.6% (90.1-99.8%)                                    |
|  | (273) | Prospective cohort          | 14/12/2020 to 10/4/2021 US.    | 3,975                            | Infection                                                                                                 | ≥14 days after first, <14 days after second: 83% (40-95%)       |
|  |       |                             |                                |                                  |                                                                                                           | ≥14 days: 82% (20-96%)                                          |
|  | (177) | Randomised controlled trial | 27/7/2020 to 23/10/2020 US.    | 30,420                           | Infection                                                                                                 | ≥14 days: 94.1% (89.3-96.8%)                                    |
|  |       |                             |                                |                                  | Infection - ≥18 to <65 years of age                                                                       | ≥14 days: 95.6% (90.6-97.9%)                                    |
|  |       |                             |                                |                                  | Infection - ≥65 years of age                                                                              | ≥14 days: 86.4% (61.4-95.2%)                                    |
|  | (302) | Retrospective cohort        | 16/7/2021 to 15/8/2021 US.     | 827                              | Infection                                                                                                 | ≥14 days: 56.6% (42.0-67.5%)                                    |
|  |       |                             |                                |                                  | Symptomatic infection                                                                                     | ≥14 days: 84.2% (56.4-94.3%)                                    |
|  | (303) | Retrospective cohort        | 22/12/2020 to 2/2/2021 US.     | 4,028                            | Infection                                                                                                 | 8-42 days: 77.5% (61.2-87%)                                     |
|  |       |                             |                                |                                  |                                                                                                           | 15-42 days: 95% (86-98.2%)                                      |
|  | (304) | Test negative case-control  | 28/10/2020 to 10/5/2021 Qatar. | 256,037                          | Infection – Alpha                                                                                         | 0-6 days: 2.4% (0-21.7%)                                        |
|  |       |                             |                                |                                  |                                                                                                           | 0-6 days: 98.0% (94.7-99.5%)                                    |
|  |       |                             |                                |                                  |                                                                                                           | 7-13 days: 0.0% (0.0-11.9%)                                     |
|  |       |                             |                                |                                  |                                                                                                           | 7-13 days: 99.2% (95.3-100.0%)                                  |
|  |       |                             |                                |                                  |                                                                                                           | 14-20 days: 81.6% (73.1-87.8%)                                  |
|  |       |                             |                                |                                  |                                                                                                           | 21-27 days: 94.4% (89.1-97.5%)                                  |
|  |       |                             |                                |                                  | Infection - Beta                                                                                          | 0-6 days: 4.2% (0-15.1%)                                        |
|  |       |                             |                                |                                  |                                                                                                           | 0-6 days: 94.2% (92.1-95.9%)                                    |
|  |       |                             |                                |                                  |                                                                                                           | 7-13 days: 0.0% (0.0-0.0%)                                      |
|  |       |                             |                                |                                  |                                                                                                           | 7-13 days: 96.4% (94.3-97.9%)                                   |
|  |       |                             |                                |                                  |                                                                                                           | 14-20 days: 47.9% (39.5-55.2%)                                  |
|  |       |                             |                                |                                  |                                                                                                           | 21-27 days: 73.7% (67.6-78.8%)                                  |
|  |       |                             |                                |                                  | Any severe, critical, or fatal infection                                                                  | 0-6 days: 18.7% (0-44.7%)                                       |
|  |       |                             |                                |                                  |                                                                                                           | 0-6 days: 100.0% (93.9-100.0%)                                  |
|  |       |                             |                                |                                  |                                                                                                           | 7-13 days: 0.0% (0.0-10.1%)                                     |
|  |       |                             |                                |                                  |                                                                                                           | 7-13 days: 100.0% (86.9-100.0%)                                 |
|  |       |                             |                                |                                  |                                                                                                           | 14-20 days: 70.3% (48.9-83.5%)                                  |
|  |       |                             |                                |                                  |                                                                                                           | 21-27 days: 92.1% (78.4-97.9%)                                  |
|  | (305) | Retrospective               | 27/4/2021 to                   | 1,945                            | Symptomatic infection - Mesa                                                                              | (36% fully vaccinated) Crude vaccine effectiveness 78% (71-84%) |

|                                                                                                  |                                                                                                   |                                                                                                    |                             |                               |                                 |                                                     |                                                                                                                              |                               |  |
|--------------------------------------------------------------------------------------------------|---------------------------------------------------------------------------------------------------|----------------------------------------------------------------------------------------------------|-----------------------------|-------------------------------|---------------------------------|-----------------------------------------------------|------------------------------------------------------------------------------------------------------------------------------|-------------------------------|--|
|                                                                                                  |                                                                                                   |                                                                                                    | cohort                      | 6/6/2021 US.                  |                                 | County, US                                          |                                                                                                                              |                               |  |
|                                                                                                  |                                                                                                   |                                                                                                    |                             |                               |                                 | Symptomatic infection - Other Colorado counties, US | (44% fully vaccinated) Crude vaccine effectiveness 89% (88-91%)                                                              |                               |  |
|                                                                                                  |                                                                                                   | (306)                                                                                              | Prospective cohort          | 18/12/2020 to 31/03/2021 US.  | 705,756                         | Infection                                           | 87.4% (85.6-89.1%)                                                                                                           |                               |  |
|                                                                                                  |                                                                                                   |                                                                                                    |                             |                               |                                 | Hospitalisation                                     | 95.8% (92.5-97.6%)                                                                                                           |                               |  |
|                                                                                                  |                                                                                                   |                                                                                                    |                             |                               |                                 | Hospital death                                      | 97.9% (84.5-99.7%)                                                                                                           |                               |  |
|                                                                                                  |                                                                                                   | (307)                                                                                              | Test-negative case control  | 1/3/2021 to 27/7/2021 US.     | 8153 cases and matched controls | Infection - Alpha                                   | ≥14 days: 90.1 (82.9 to 94.2)      ≥14 days: 98.4 (96.9 to 99.1)                                                             |                               |  |
|                                                                                                  |                                                                                                   |                                                                                                    |                             |                               |                                 | Infection – Delta                                   | ≥14 days: 77.0% (60.7-86.5%)      ≥14 days: 86.7% (84.3-88.7%)                                                               |                               |  |
|                                                                                                  |                                                                                                   |                                                                                                    |                             |                               |                                 | Infection – Epsilon                                 | ≥14 days: 76.3% (48.1-89.1%)      ≥14 days: 97.6% (90.2-99.4%)                                                               |                               |  |
|                                                                                                  |                                                                                                   |                                                                                                    |                             |                               |                                 | Infection – Gamma                                   | ≥14 days: 74.2% (43.8-88.1%)      ≥14 days: 95.5% (90.9-97.8%)                                                               |                               |  |
|                                                                                                  |                                                                                                   |                                                                                                    |                             |                               |                                 | Infection – Iota                                    | ≥14 days: 88.8% (0.7-98.7%)      ≥14 days: 95.7% (81.7-99.0%)                                                                |                               |  |
|                                                                                                  |                                                                                                   |                                                                                                    |                             |                               |                                 | Infection – Mu                                      | ≥14 days: 45.8% (0.0-88.9%)      ≥14 days: 90.4% (73.9-96.5%)                                                                |                               |  |
|                                                                                                  |                                                                                                   |                                                                                                    |                             |                               |                                 | Infection – Other                                   | ≥14 days: 84.3% (65.9-92.7%)      ≥14 days: 96.4% (91.2-98.5%)                                                               |                               |  |
|                                                                                                  |                                                                                                   |                                                                                                    |                             |                               |                                 | Infection - Unidentified                            | ≥14 days: 67.6% (57.1-75.6%)      ≥14 days: 79.9% (76.9-82.5%)                                                               |                               |  |
|                                                                                                  |                                                                                                   | (278)                                                                                              | Test-negative case-control  | January to March 2021 US.     | 1,843                           | Infection                                           | ≥14 days: 81.7% (74.3-86.9%)      ≤2 days: 81.7% (74.3-86.9%)<br>3-6 days: 81.7% (74.3-86.9%)<br>≥7 days: 93.5% (86.5-96.9%) |                               |  |
| [NOTE: 24% of case-patients and 22% of controls received mRNA-1273, remainder received BNT162b2] |                                                                                                   |                                                                                                    |                             |                               |                                 |                                                     |                                                                                                                              |                               |  |
|                                                                                                  |                                                                                                   | (282)                                                                                              | Prospective cohort          | 1/5/2021 to 3/9/2021 US.      | 8,690,825                       | Infection - 18-49 years old                         | ≥14 days: 96.3% (95.4-97.2%)                                                                                                 |                               |  |
|                                                                                                  |                                                                                                   |                                                                                                    |                             |                               |                                 | Infection - 50-64 years old                         | ≥14 days: 97.3% (96.4-98.1%)                                                                                                 |                               |  |
|                                                                                                  |                                                                                                   |                                                                                                    |                             |                               |                                 | Infection - ≤65 years old                           | ≥14 days: 96.0% (95.1-96.9%)                                                                                                 |                               |  |
|                                                                                                  |                                                                                                   |                                                                                                    |                             |                               |                                 | Hospitalisation - 18-49 years old                   | ≥14 days: 96.6% (94.3-98.1%)                                                                                                 |                               |  |
|                                                                                                  |                                                                                                   |                                                                                                    |                             |                               |                                 | Hospitalisation - 50-64 years old                   | ≥14 days: 97.3% (95.9-98.2%)                                                                                                 |                               |  |
|                                                                                                  |                                                                                                   |                                                                                                    |                             |                               |                                 | Hospitalisation - ≤65 years old                     | ≥14 days: 97.1% (96.5-97.6%)                                                                                                 |                               |  |
|                                                                                                  |                                                                                                   | (308)                                                                                              | Randomised controlled trial | 27/7/2020 to 23/10/2020 US.   | 30,415                          | Asymptomatic infection                              | 63.0% (56.6-68.5%)                                                                                                           |                               |  |
|                                                                                                  |                                                                                                   |                                                                                                    |                             |                               |                                 | Symptomatic infection                               | 93.2% (91.0-94.8%)                                                                                                           |                               |  |
|                                                                                                  |                                                                                                   |                                                                                                    |                             |                               |                                 | Severe infection                                    | 98.2% (92.8-99.6%)                                                                                                           |                               |  |
|                                                                                                  |                                                                                                   |                                                                                                    |                             |                               |                                 | Death                                               | 100.0% (NE-100.0%)                                                                                                           |                               |  |
| <b>Sinopharm BBIBP-CorV</b> - Aluminium-hydroxide-adjuvanted, inactivated whole virus vaccine    | Two doses (0.5ml) intramuscularly (deltoid) with a recommended interval of 3 weeks between doses. | (309)                                                                                              | Test-negative case-control  | 18/5/2021 to 20/6/2021 China. | 366                             | Infection                                           | 13.8% (-60.2-54.8%)                                                                                                          | 59.0% (16.0-81.6%)            |  |
|                                                                                                  |                                                                                                   |                                                                                                    |                             |                               |                                 | Moderately severe infection                         |                                                                                                                              | 70.2% (29.6-89.3%)            |  |
|                                                                                                  |                                                                                                   | [NOTE: 27.5% of study participants were vaccinated with Sinopharm BIBP (61.3% received CoronaVac)] |                             |                               |                                 |                                                     |                                                                                                                              |                               |  |
|                                                                                                  |                                                                                                   | (310)                                                                                              | Retrospective cohort        | May to June 2021 China.       | 10,813                          | Infection with Pneumonia – Delta                    | 8.4% (-47.6-64.4%)                                                                                                           | 69.5% (42.8-96.3%)            |  |
|                                                                                                  |                                                                                                   |                                                                                                    |                             |                               |                                 | Severe/critical disease -Delta                      | 100% (NA)                                                                                                                    | 100% (NA)                     |  |
|                                                                                                  |                                                                                                   | (311)                                                                                              | Retrospective cohort        | 9/2/2021 to 30/6/2021 Peru.   | 606,772                         | Infection                                           | ≥14 days: 15.3 (12.7 to 17.8)                                                                                                | ≥14 days: 49.2 (47.9 to 50.4) |  |
|                                                                                                  |                                                                                                   |                                                                                                    |                             |                               |                                 | COVID-19 mortality                                  | ≥14 days: 45.2% (28.8-57.8%)                                                                                                 | ≥14 days: 93.9% (90.9-95.9%)  |  |
|                                                                                                  |                                                                                                   |                                                                                                    |                             |                               |                                 | Infection - ≥60 years old                           | ≥14 days: 14.1% (5.2-22.2%)                                                                                                  | ≥14 days: 54.7% (50.7-58.3%)  |  |
|                                                                                                  |                                                                                                   |                                                                                                    |                             |                               |                                 | COVID-19 mortality - ≥60 years old                  | ≥14 days: 25.5% (-10.2-49.7%)                                                                                                | ≥14 days: 90.6% (83.8-94.5%)  |  |
|                                                                                                  |                                                                                                   | (312)                                                                                              | Randomised                  | 16/7/2020 to                  | 40,382                          | Infection                                           |                                                                                                                              | ≥14 days: 73.5% (60.6-82.2%)  |  |





|    |                                                                   |       |                             |                                 |                               |                                       |                                                          |                               |                         |                                                                                  |                              |                         |                        |
|----|-------------------------------------------------------------------|-------|-----------------------------|---------------------------------|-------------------------------|---------------------------------------|----------------------------------------------------------|-------------------------------|-------------------------|----------------------------------------------------------------------------------|------------------------------|-------------------------|------------------------|
|    |                                                                   |       | trial                       | Turkey.                         |                               |                                       |                                                          |                               |                         |                                                                                  |                              |                         |                        |
| 1  |                                                                   | (321) | Randomised controlled trial | 21/7/2020 to 16/12/2020 Brazil. | 9,823                         | Infection                             | ≤14 days: -3.3% (-4.8- -1.9%)                            | ≥14 days: 50.7% (35.9-62%)    |                         |                                                                                  |                              |                         |                        |
| 2  |                                                                   |       |                             |                                 |                               |                                       | 14-28 days: 94.0% (55.1-99.2%)                           |                               |                         |                                                                                  |                              |                         |                        |
| 3  |                                                                   |       |                             |                                 |                               |                                       | ≤28 days: 42.5% (32.9-50.7%)                             |                               |                         |                                                                                  |                              |                         |                        |
| 4  |                                                                   |       |                             |                                 |                               |                                       | ≤42 days: 56.5% (49.6-62.5%)                             |                               |                         |                                                                                  |                              |                         |                        |
| 5  |                                                                   |       |                             |                                 |                               |                                       | ≤56 days: 60.4% (56.5-63.9%)                             |                               |                         |                                                                                  |                              |                         |                        |
| 6  |                                                                   |       |                             |                                 |                               |                                       | ≤70 days: 54.7% (53.2-56.1%)                             |                               |                         |                                                                                  |                              |                         |                        |
| 7  |                                                                   |       |                             |                                 |                               |                                       | ≤84 days: 53.7% (52.7-54.7%)                             |                               |                         |                                                                                  |                              |                         |                        |
| 8  |                                                                   |       |                             |                                 |                               |                                       | ≤98 days: 52.5% (51.9-53.1%)                             |                               |                         |                                                                                  |                              |                         |                        |
| 9  |                                                                   |       |                             |                                 |                               |                                       | Infection requiring medical assistance (hospitalisation) | ≥14 days: 83.7% (58.0-93.7%)  |                         |                                                                                  |                              |                         |                        |
| 10 |                                                                   |       |                             |                                 |                               |                                       | Moderate infection                                       | ≥14 days: 100% (56.4-100%)    |                         |                                                                                  |                              |                         |                        |
| 11 |                                                                   |       |                             |                                 |                               | Severe infection or death             | ≥14 days: 100% (16.9-100%)                               |                               |                         |                                                                                  |                              |                         |                        |
| 12 |                                                                   |       |                             |                                 |                               | Infection - <21 days between 2 doses  | ≥14 days: 49.1% (33-61.4%)                               |                               |                         |                                                                                  |                              |                         |                        |
| 13 |                                                                   |       |                             |                                 |                               | Infection - ≥21 days between 2 doses  | ≥14 days: 62.3% (13.9-83.5%)                             |                               |                         |                                                                                  |                              |                         |                        |
| 14 |                                                                   | (295) | Cohort                      | 17/1/2021 to 11/5/2021 Brazil.  | 313,328                       | Death                                 | ≥21 days: 95.1% (94.7-95.5%)                             | ≥21 days: 99.1% (98.9-99.3%)  |                         |                                                                                  |                              |                         |                        |
| 15 |                                                                   |       |                             |                                 |                               | Death – 75-79 years old               | ≥21 days: 86.3% (84.7-87.7%)                             |                               |                         |                                                                                  |                              |                         |                        |
| 16 |                                                                   |       |                             |                                 |                               | Death – 80-89 years old               | ≥21 days: 97.6% (97.2-97.9%)                             |                               |                         |                                                                                  |                              |                         |                        |
| 17 |                                                                   |       |                             |                                 |                               | Death - ≥90 years old                 | ≥21 days: 99.3% (99.1-99.5%)                             |                               |                         |                                                                                  |                              |                         |                        |
| 18 |                                                                   | (296) | Retrospective cohort        | 18/1/2021 to 30/6/2021 Brazil   | 60,577, 870                   | Infection                             | ≥14 days: 16.4% (15.2-17.5%)                             | 0-13 days: 40.3% (39.4-41.2%) |                         |                                                                                  |                              |                         |                        |
| 19 |                                                                   |       |                             |                                 |                               |                                       |                                                          | ≥14 days: 54.2% (53.4-55.0%)  |                         |                                                                                  |                              |                         |                        |
| 20 |                                                                   |       |                             |                                 |                               | Hospitalisation                       | ≥14 days: 26.6% (24.6-28.4%)                             | 0-13 days: 57.3% (56.0-58.6%) |                         |                                                                                  |                              |                         |                        |
| 21 |                                                                   |       |                             |                                 |                               |                                       |                                                          | ≥14 days: 72.6% (71.6-73.6%)  |                         |                                                                                  |                              |                         |                        |
| 22 |                                                                   |       |                             |                                 |                               | ICU admission                         | ≥14 days: 28.1% (24.9-31.1%)                             | 0-13 days: 58.1% (55.9-60.1%) |                         |                                                                                  |                              |                         |                        |
| 23 |                                                                   |       |                             |                                 |                               |                                       |                                                          | ≥14 days: 74.2% (72.6-75.7%)  |                         |                                                                                  |                              |                         |                        |
| 24 |                                                                   |       |                             |                                 |                               | Death                                 | ≥14 days: 29.4% (26.7-32.0%)                             | 0-13 days: 58.7% (56.9-60.4%) |                         |                                                                                  |                              |                         |                        |
| 25 |                                                                   |       |                             |                                 |                               |                                       |                                                          | ≥14 days: 74% (72.6-75.3%)    |                         |                                                                                  |                              |                         |                        |
| 26 |                                                                   |       |                             |                                 |                               |                                       |                                                          |                               |                         |                                                                                  |                              |                         |                        |
| 27 |                                                                   |       |                             |                                 |                               |                                       |                                                          |                               |                         |                                                                                  |                              |                         |                        |
| 28 |                                                                   |       |                             |                                 |                               |                                       |                                                          |                               |                         |                                                                                  |                              |                         |                        |
| 29 |                                                                   |       |                             |                                 |                               |                                       |                                                          |                               |                         |                                                                                  |                              |                         |                        |
| 30 | Bharat Biotech – Covaxin – whole virion inactivated virus vaccine | (322) | Randomised controlled trial | 16/11/2020 to 7/1/2021 India.   | 25 798                        | Symptomatic infection                 |                                                          | ≥14 days: 77.8% (65.2-86.4%)  |                         |                                                                                  |                              |                         |                        |
| 31 |                                                                   |       |                             |                                 |                               |                                       |                                                          |                               |                         | Severe disease                                                                   | ≥14 days: 93.4% (57.1-99.8%) |                         |                        |
| 32 |                                                                   |       |                             |                                 |                               |                                       |                                                          |                               |                         | Symptomatic infection – 18-59 years old                                          | ≥14 days: 79.4% (66.0-88.2%) |                         |                        |
| 33 |                                                                   |       |                             |                                 |                               |                                       |                                                          |                               |                         | Symptomatic infection - ≥60 years old                                            | ≥14 days: 67.8% (8.0-90.0%)  |                         |                        |
| 34 |                                                                   |       |                             |                                 |                               |                                       |                                                          |                               |                         | Symptomatic infection – participants with pre-existing chronic medical condition | ≥14 days: 66.2% (33.8-84.0%) |                         |                        |
| 35 |                                                                   |       |                             |                                 |                               |                                       |                                                          |                               |                         | Asymptomatic infection                                                           | ≥14 days: 63.6% (29.0-82.4%) |                         |                        |
| 36 |                                                                   |       |                             |                                 |                               | Symptomatic or asymptomatic infection | ≥14 days: 68.8% (46.7-82.5%)                             |                               |                         |                                                                                  |                              |                         |                        |
| 37 |                                                                   |       | (323)                       | Test-negative case-control      | 15/4/2021 to 15/5/2021 India. | 3,732                                 | Symptomatic infection                                    | <7 days: 40% (-21-71%)        | <14 days: 27% (-35-61%) |                                                                                  |                              |                         |                        |
| 38 |                                                                   |       |                             |                                 |                               |                                       |                                                          |                               |                         |                                                                                  |                              | ≥7 days: 1% (-30-25%)   | ≥14 days: 50% (33-62%) |
| 39 |                                                                   |       |                             |                                 |                               |                                       |                                                          |                               |                         |                                                                                  |                              | ≥21 days: -1% (-51-33%) | ≥28 days: 46% (22-62%) |
| 40 |                                                                   |       |                             |                                 |                               |                                       |                                                          |                               |                         |                                                                                  |                              | ≥42 days: 57% (21-76%)  |                        |
| 41 |                                                                   |       |                             |                                 |                               |                                       |                                                          |                               |                         |                                                                                  |                              |                         |                        |
| 42 |                                                                   |       |                             |                                 |                               |                                       |                                                          |                               |                         |                                                                                  |                              |                         |                        |
| 43 |                                                                   |       |                             |                                 |                               |                                       |                                                          |                               |                         |                                                                                  |                              |                         |                        |
| 44 |                                                                   |       |                             |                                 |                               |                                       |                                                          |                               |                         |                                                                                  |                              |                         |                        |
| 45 |                                                                   |       |                             |                                 |                               |                                       |                                                          |                               |                         |                                                                                  |                              |                         |                        |
| 46 |                                                                   |       |                             |                                 |                               |                                       |                                                          |                               |                         |                                                                                  |                              |                         |                        |



|    |                                                                                                                                                                                                   |       |                               |                              |                                       |                                                                                      |                                |                              |                                      |
|----|---------------------------------------------------------------------------------------------------------------------------------------------------------------------------------------------------|-------|-------------------------------|------------------------------|---------------------------------------|--------------------------------------------------------------------------------------|--------------------------------|------------------------------|--------------------------------------|
| 1  |                                                                                                                                                                                                   | (293) | Cross-sectional observational | 1/5/2021 to 31/5/2021 India. | 583                                   | Infection                                                                            | <14 days: 15% (-68-57%)        | <14 days: 66% (34-81%)       |                                      |
| 2  |                                                                                                                                                                                                   |       |                               |                              |                                       |                                                                                      | ≥14 days: 44% (7-66%)          | ≥14 days: 83% (73-89%)       |                                      |
| 3  |                                                                                                                                                                                                   |       |                               |                              |                                       | Hospitalisation                                                                      | <14 days: 43% (-68-81%)        | <14 days: 83% (17-96%)       |                                      |
| 4  |                                                                                                                                                                                                   |       |                               |                              |                                       |                                                                                      | ≥14 days: 76% (21-92%)         | ≥14 days: 88% (55-97%)       |                                      |
| 5  |                                                                                                                                                                                                   |       |                               |                              |                                       | ICU admission or death                                                               | <14 days: 62% (-27-89%)        | <14 days: 93% (35-99%)       |                                      |
| 6  |                                                                                                                                                                                                   |       |                               |                              |                                       |                                                                                      | ≥14 days: 53% (9-29-83%)       | ≥14 days: 93% (64-99%)       |                                      |
| 7  |                                                                                                                                                                                                   |       |                               |                              |                                       | [NOTE: Participants either received Covaxin or Covishield (AZD1222)]                 |                                |                              |                                      |
| 8  |                                                                                                                                                                                                   | (294) | Retrospective cohort          | 1/6/2020 to 31/5/2021 India. | 11,405                                | Infection (with evidence of prior infection)                                         |                                | ≥14 days: 91.1% (84.1-94.9%) |                                      |
| 9  |                                                                                                                                                                                                   |       |                               |                              |                                       | Infection (without evidence of prior infection)                                      |                                | ≥14 days: 31.8% (23.5-39.1%) |                                      |
| 10 |                                                                                                                                                                                                   |       |                               |                              |                                       | [NOTE: 5.77% of participants received Covaxin, 94.23% received Covishield (AZD1222)] |                                |                              |                                      |
| 11 |                                                                                                                                                                                                   | (324) | Retrospective cohort          | 3/3/2020 to 18/6/2021 India. | 15,244                                | Reinfection                                                                          |                                | 86% (77-92%)                 |                                      |
| 12 |                                                                                                                                                                                                   |       |                               |                              |                                       | Symptomatic reinfection                                                              |                                | 87% (76-93%)                 |                                      |
| 13 |                                                                                                                                                                                                   |       |                               |                              |                                       | Asymptomatic reinfection                                                             |                                | 84% (47-95%)                 |                                      |
| 14 |                                                                                                                                                                                                   |       |                               |                              |                                       |                                                                                      |                                |                              |                                      |
| 15 |                                                                                                                                                                                                   |       |                               |                              |                                       |                                                                                      |                                |                              |                                      |
| 16 |                                                                                                                                                                                                   |       |                               |                              |                                       |                                                                                      |                                |                              |                                      |
| 17 | <b>Novavax – NVX-CoV2373 (Nuvaxovid) or Serum Institute of India – COVOVAX (Novavax formulation - recombinant SARS-CoV-2 S protein nanoparticle as a coformulation with the adjuvant Matrix-M</b> | (325) | Randomised controlled trial   | 28/9/2020 to 28/10/2020 UK.  | 14,039                                | Infection                                                                            |                                | 89.7% (80.2-94.6%)           |                                      |
| 18 |                                                                                                                                                                                                   |       |                               |                              |                                       |                                                                                      | Infection – 18 to 64 years old |                              | 89.8% (79.7-95.5%)                   |
| 19 |                                                                                                                                                                                                   |       |                               |                              |                                       |                                                                                      | Infection – 65 to 84 years old |                              | 88.9% (20.2-99.7%)                   |
| 20 |                                                                                                                                                                                                   |       |                               |                              |                                       |                                                                                      | Infection – Alpha              |                              | 86.3% (71.3-93.5%)                   |
| 21 |                                                                                                                                                                                                   |       |                               |                              |                                       |                                                                                      | Infection – Non-Alpha          |                              | 96.4% (73.8-99.5%)                   |
| 22 |                                                                                                                                                                                                   |       | (326)                         | Randomised controlled trial  | 27/12.2020 to 18/2/2021 US, Mexico.   | 29,949                                                                               | Infection                      |                              | ≥7 days: 89.3% (81.6-93.8%)          |
| 23 |                                                                                                                                                                                                   |       |                               |                              |                                       |                                                                                      |                                |                              | Infection – COVID-19 high risk group |
| 24 |                                                                                                                                                                                                   |       | (327)                         | Randomised controlled trial  | 28/9/2020 to 28/10/2020 UK.           | 15,139                                                                               | Infection                      |                              | 89.8% (79.7-95.5%)                   |
| 25 |                                                                                                                                                                                                   |       |                               |                              |                                       |                                                                                      |                                |                              | Infection – 18-64 years old          |
| 26 |                                                                                                                                                                                                   |       | (328)                         | Randomised controlled trial  | 17/7/2020 to 25/11/2020 South Africa. | 2,684                                                                                | Symptomatic infection          |                              | ≥7 days: 49.4% (6.1-72.8%)           |
| 27 |                                                                                                                                                                                                   |       |                               |                              |                                       |                                                                                      |                                |                              | Symptomatic infection – Beta         |
| 28 |                                                                                                                                                                                                   |       |                               |                              |                                       |                                                                                      |                                |                              |                                      |
| 29 |                                                                                                                                                                                                   |       |                               |                              |                                       |                                                                                      |                                |                              |                                      |
| 30 |                                                                                                                                                                                                   |       |                               |                              |                                       |                                                                                      |                                |                              |                                      |
| 31 |                                                                                                                                                                                                   |       |                               |                              |                                       |                                                                                      |                                |                              |                                      |
| 32 |                                                                                                                                                                                                   |       |                               |                              |                                       |                                                                                      |                                |                              |                                      |
| 33 |                                                                                                                                                                                                   |       |                               |                              |                                       |                                                                                      |                                |                              |                                      |
| 34 |                                                                                                                                                                                                   |       |                               |                              |                                       |                                                                                      |                                |                              |                                      |
| 35 |                                                                                                                                                                                                   |       |                               |                              |                                       |                                                                                      |                                |                              |                                      |
| 36 |                                                                                                                                                                                                   |       |                               |                              |                                       |                                                                                      |                                |                              |                                      |
| 37 |                                                                                                                                                                                                   |       |                               |                              |                                       |                                                                                      |                                |                              |                                      |
| 38 |                                                                                                                                                                                                   |       |                               |                              |                                       |                                                                                      |                                |                              |                                      |
| 39 |                                                                                                                                                                                                   |       |                               |                              |                                       |                                                                                      |                                |                              |                                      |
| 40 |                                                                                                                                                                                                   |       |                               |                              |                                       |                                                                                      |                                |                              |                                      |
| 41 |                                                                                                                                                                                                   |       |                               |                              |                                       |                                                                                      |                                |                              |                                      |
| 42 |                                                                                                                                                                                                   |       |                               |                              |                                       |                                                                                      |                                |                              |                                      |
| 43 |                                                                                                                                                                                                   |       |                               |                              |                                       |                                                                                      |                                |                              |                                      |
| 44 |                                                                                                                                                                                                   |       |                               |                              |                                       |                                                                                      |                                |                              |                                      |
| 45 |                                                                                                                                                                                                   |       |                               |                              |                                       |                                                                                      |                                |                              |                                      |
| 46 |                                                                                                                                                                                                   |       |                               |                              |                                       |                                                                                      |                                |                              |                                      |

| Vaccine type                        | Vaccine                                                          | Company                                                                           | Countries approved for use in                                                                                                 | Clinical trials                                                                                                                                                                                                                                                                                                                                                                                                                                                           |
|-------------------------------------|------------------------------------------------------------------|-----------------------------------------------------------------------------------|-------------------------------------------------------------------------------------------------------------------------------|---------------------------------------------------------------------------------------------------------------------------------------------------------------------------------------------------------------------------------------------------------------------------------------------------------------------------------------------------------------------------------------------------------------------------------------------------------------------------|
| <b>Inactivated virus</b>            | <b>KoviVac</b>                                                   | Chumakov Center (Moscow, Russia)                                                  | <b>3 countries:</b><br>Belarus, Cambodia, Russian Federation                                                                  | Phase 1: 502 (Russian Federation).<br>Phase 2:<br>502 (Russian Federation).<br>622 (Russian Federation).                                                                                                                                                                                                                                                                                                                                                                  |
|                                     | <b>QazVac</b>                                                    | Kazakhstan Research Institute for Biological Safety Problems (RIBSP) (Kazakhstan) | <b>2 countries:</b><br>Kazakhstan, Kyrgyzstan                                                                                 | Phase 1: NCT04530357 (Kazakhstan).<br>Phase 2: NCT04530357 (Kazakhstan).<br>Phase 3: NCT04691908 (Kazakhstan).                                                                                                                                                                                                                                                                                                                                                            |
|                                     | <b>KCONVAC</b>                                                   | Minhai Biotechnology Co. (Beijing, China)                                         | <b>2 countries:</b><br>China, Indonesia                                                                                       | Phase 1:<br>NCT05003479 (China).<br>ChiCTR2000038804, NCT04758273 (China).<br>Phase 2:<br>ChiCTR2000039462, NCT04756323 (China).<br>NCT05003466 (China).<br>Phase 3: NCT04852705                                                                                                                                                                                                                                                                                          |
|                                     | <b>COVIran Barekat</b>                                           | Shifa Pharmed Industrial Co. (Tehran, Iran)                                       | <b>1 country:</b><br>Iran                                                                                                     | Phase 1:<br>IRCT20201202049567N1 (Iran).<br>IRCT20201202049567N2 (Iran).<br>IRCT20171122037571N3 (Iran).<br>Phase 2:<br>IRCT20201202049567N3 (Iran).<br>IRCT20171122037571N3 (Iran).<br>Phase 3: IRCT20201202049567N3 (Iran).                                                                                                                                                                                                                                             |
|                                     | <b>Inactivated (Vero Cells)</b>                                  | Sinopharm (Wuhan, China)                                                          | <b>2 countries:</b><br>China, Philippines                                                                                     | Phase 1: ChiCTR2000031809 (China)<br>Phase 2:<br>NCT04885764 (Egypt).<br>ChiCTR2000031809 (China).<br>Phase 3:<br>NCT04885764 (Egypt).<br>ChiCTR2000034780 (United Arab Emirates).<br>NCT04612972 (Peru).<br>NCT04510207 (Bahrain, Egypt, Jordan, United Arab Emirates).<br>ChiCTR2000039000 (Morocco).                                                                                                                                                                   |
|                                     | <b>Turkovac</b>                                                  | Health Institutes of Turkey (Istanbul, Turkey)                                    | <b>1 country:</b><br>Turkey                                                                                                   | Phase 1: NCT04691947 (Turkey).<br>Phase 2:<br>NCT04824391 (Turkey).<br>NCT04979949 (Turkey).<br>NCT05035238 (Turkey).<br>Phase 3:<br>NCT04942405 (Turkey).<br>NCT05077176 (Turkey).                                                                                                                                                                                                                                                                                       |
| <b>FAKHRAVAC (MIVAC)</b>            | Organization of Defensive Innovation and Research (Tehran, Iran) | <b>1 country:</b><br>Iran                                                         | Phase 1: IRCT20210206050259N1 (Iran).<br>Phase 2: IRCT20210206050259N2 (Iran).<br>Phase 3: IRCT20210206050259N3 (Iran).       |                                                                                                                                                                                                                                                                                                                                                                                                                                                                           |
| <b>Non-replicating viral vector</b> | <b>Convidecia</b>                                                | CanSino (Tianjin, China)                                                          | <b>10 countries:</b><br>Argentina, Chile, China, Ecuador, Hungary, Indonesia, Malaysia, Mexico, Pakistan, Republic of Moldova | Phase 1:<br>NCT05043259 (China).<br>ChiCTR2000030906, NCT04313127 (China).<br>NCT04568811 (China).<br>NCT04840992 (China).<br>Phase 2:<br>NCT05043259 (China).<br>NCT05162482 (Pakistan).<br>NCT04840992 (China).<br>ChiCTR2000031781, NCT04341389 (China).<br>NCT04566770 (China).<br>NCT05005156 (Argentina).<br>Phase 3:<br>NCT05169008 (Chile, Mexico).<br>NCT04526990 (Argentina, Chile, Mexico, Pakistan, Russian Federation).<br>NCT04540419 (Russian Federation). |
|                                     | <b>Sputnik Light</b>                                             | Gamaleya Research Institute of Epidemiology and                                   | <b>24 countries:</b><br>Angola, Argentina, Armenia, Bahrain, Belarus, Cambodia, Egypt, Iran, Kazakhstan,                      | Phase 1: NCT04713488 (Russian Federation).<br>Phase 2:<br>NCT04713488 (Russian Federation).                                                                                                                                                                                                                                                                                                                                                                               |

|                        |                                      |                                                                               |                                                                                                                                                                                                                                                                                                                                                                                                                                                                                                                                                                                                                                                                                                                                                                                                                                                                                          |                                                                                                                                                                                                                                                                                                                                                                                                                                                                                                                                                                                                                                                                                                                                                                                                                        |
|------------------------|--------------------------------------|-------------------------------------------------------------------------------|------------------------------------------------------------------------------------------------------------------------------------------------------------------------------------------------------------------------------------------------------------------------------------------------------------------------------------------------------------------------------------------------------------------------------------------------------------------------------------------------------------------------------------------------------------------------------------------------------------------------------------------------------------------------------------------------------------------------------------------------------------------------------------------------------------------------------------------------------------------------------------------|------------------------------------------------------------------------------------------------------------------------------------------------------------------------------------------------------------------------------------------------------------------------------------------------------------------------------------------------------------------------------------------------------------------------------------------------------------------------------------------------------------------------------------------------------------------------------------------------------------------------------------------------------------------------------------------------------------------------------------------------------------------------------------------------------------------------|
|                        |                                      | Microbiology<br>(Moscow, Russia)                                              | Kyrgyzstan, Lao People's Democratic Republic, Mauritius, Mongolia, Nicaragua, Philippines, Republic of the Congo, Russian Federation, San Marino, Tunisia, Turkmenistan, United Arab Emirates, United Republic of Tanzania, Venezuela, West Bank                                                                                                                                                                                                                                                                                                                                                                                                                                                                                                                                                                                                                                         | NCT05027672 (Argentina).<br>Phase 3: NCT04741061 (Russian Federation).                                                                                                                                                                                                                                                                                                                                                                                                                                                                                                                                                                                                                                                                                                                                                 |
|                        | <b>Sputnik V</b>                     | Gamaleya Research Institute of Epidemiology and Microbiology (Moscow, Russia) | <b>74 countries:</b><br>Albania, Algeria, Angola, Antigua and Barbuda, Argentina, Armenia, Azerbaijan, Bahrain, Bangladesh, Belarus, Bolivia, Bosnia and Herzegovina, Brazil, Cambodia, Cameroon, Chile, Djibouti, Ecuador, Egypt, Gabon, Ghana, Guatemala, Guinea, Guyana, Honduras, Hungary, India, Indonesia, Iran, Iraq, Jordan, Kazakhstan, Kenya, Kyrgyzstan, Lao People's Democratic Republic, Lebanon, Libya, Maldives, Mali, Mauritius, Mexico, Mongolia, Montenegro, Morocco, Myanmar, Namibia, Nepal, Nicaragua, Nigeria, North Macedonia, Oman, Pakistan, Panama, Paraguay, Philippines, Republic of Moldova, Republic of the Congo, Russian Federation, Rwanda, Saint Vincent and the Grenadines, San Marino, Serbia, Seychelles, Sri Lanka, Syrian Arab Republic, Tunisia, Turkey, Turkmenistan, United Arab Emirates, Uzbekistan, Venezuela, Vietnam, West Bank, Zimbabwe | Phase 1:<br>NCT04760730 (United Arab Emirates).<br>NCT04684446 (Belarus, Russian Federation).<br>NCT04436471, 241 (Russian Federation).<br>NCT04437875 (Russian Federation).<br>Phase 2:<br>NCT05027672 (Argentina).<br>NCT04988048 (Argentina).<br>NCT04954092 (Russian Federation).<br>NCT04962906 (Argentina).<br>NCT04983537 (Argentina).<br>NCT04760730 (United Arab Emirates).<br>NCT04684446 (Belarus, Russian Federation).<br>NCT04686773 (Azerbaijan).<br>NCT04436471, 241 (Russian Federation).<br>NCT04437875 (Russian Federation).<br>NCT04587219 (Russian Federation).<br>NCT04640233 (India).<br>Phase 3:<br>NCT04564716 (Belarus).<br>NCT04530396 (Russian Federation).<br>NCT04642339 (Venezuela).<br>NCT04656613 (United Arab Emirates).<br>NCT04954092 (Russian Federation).<br>NCT04640233 (India). |
| <b>RNA</b>             | <b>TAK-919 (Moderna formulation)</b> | Takeda (Tokyo, Japan)                                                         | <b>1 country:</b><br>Japan                                                                                                                                                                                                                                                                                                                                                                                                                                                                                                                                                                                                                                                                                                                                                                                                                                                               | Phase 1: NCT04677660 (Japan).<br>Phase 2: NCT04677660 (Japan).                                                                                                                                                                                                                                                                                                                                                                                                                                                                                                                                                                                                                                                                                                                                                         |
| <b>DNA</b>             | <b>ZyCoV-D</b>                       | Zyodus Cadila (Ahmedabad, India)                                              | <b>1 country:</b><br>India                                                                                                                                                                                                                                                                                                                                                                                                                                                                                                                                                                                                                                                                                                                                                                                                                                                               | Phase 1:<br>CTRI/2020/07/026352 (India).<br>CTRI/2021/03/032051 (India).<br>Phase 2:<br>CTRI/2020/07/026352 (India).<br>CTRI/2021/03/032051 (India).<br>Phase 3: CTRI/2021/01/030416 (India).                                                                                                                                                                                                                                                                                                                                                                                                                                                                                                                                                                                                                          |
| <b>Protein subunit</b> | <b>ZF2001</b>                        | Anhui Zhifei Longcom (Hefei, China)                                           | <b>3 countries:</b><br>China, Indonesia, Uzbekistan                                                                                                                                                                                                                                                                                                                                                                                                                                                                                                                                                                                                                                                                                                                                                                                                                                      | Phase 1:<br>NCT04445194 (China).<br>NCT04636333 (China).<br>NCT04550351, ChiCTR2000035691 (China).<br>NCT04961359 (China).<br>Phase 2:<br>NCT04466085 (China).<br>NCT05109598 (China).<br>NCT04813562 (China).<br>Phase 3:<br>NCT05091411 (China).<br>NCT05128643 (China).<br>NCT05107375 (China).<br>ChiCTR2000040153, NCT04646590 (China, Ecuador, Indonesia, Pakistan, Uzbekistan).<br>ChiCTR2100050849 (China).                                                                                                                                                                                                                                                                                                                                                                                                    |
|                        | <b>Abdala</b>                        | Center for Genetic Engineering and Biotechnology (CIGB) (Havana, Cuba)        | <b>6 countries:</b><br>Cuba, Mexico, Nicaragua, Saint Vincent and the Grenadines, Venezuela, Vietnam                                                                                                                                                                                                                                                                                                                                                                                                                                                                                                                                                                                                                                                                                                                                                                                     | Phase 1:<br>RPCEC00000345 (Cuba).<br>RPCEC00000346 (Cuba).<br>Phase 2:<br>RPCEC00000345 (Cuba).<br>RPCEC00000346 (Cuba).                                                                                                                                                                                                                                                                                                                                                                                                                                                                                                                                                                                                                                                                                               |

|    |                                                  |                                                         |                                                                              |                                                                                                                                                                                                                                                                                                   |
|----|--------------------------------------------------|---------------------------------------------------------|------------------------------------------------------------------------------|---------------------------------------------------------------------------------------------------------------------------------------------------------------------------------------------------------------------------------------------------------------------------------------------------|
|    |                                                  |                                                         |                                                                              | Phase 3: RPCEC00000359 (Cuba).                                                                                                                                                                                                                                                                    |
| 1  | <b>EpiVacCorona</b>                              | FBRI (Koltsovo, Russia)                                 | <b>4 countries:</b><br>Cambodia, Russian Federation, Turkmenistan, Venezuela | Phase 1: NCT04527575 (Russian Federation).<br>Phase 2: NCT04527575 (Russian Federation).<br>Phase 3: NCT04780035 (Russian Federation).<br>NCT05021016 (Russian Federation)                                                                                                                        |
| 2  |                                                  |                                                         |                                                                              |                                                                                                                                                                                                                                                                                                   |
| 3  |                                                  |                                                         |                                                                              |                                                                                                                                                                                                                                                                                                   |
| 4  |                                                  |                                                         |                                                                              |                                                                                                                                                                                                                                                                                                   |
| 5  |                                                  |                                                         |                                                                              |                                                                                                                                                                                                                                                                                                   |
| 6  |                                                  |                                                         |                                                                              |                                                                                                                                                                                                                                                                                                   |
| 7  |                                                  |                                                         |                                                                              |                                                                                                                                                                                                                                                                                                   |
| 8  | <b>Aurora-CoV</b>                                | FBRI (Koltsovo, Russia)                                 | <b>1 country:</b><br>Russian Federation                                      | Phase 1: 197 (Russian Federation).<br>Phase 2: 197 (Russian Federation).                                                                                                                                                                                                                          |
| 9  |                                                  |                                                         |                                                                              |                                                                                                                                                                                                                                                                                                   |
| 10 | <b>MVC-COV1901</b>                               | Medigen Biotechnology Corp. (Taipei City, Taiwan)       | <b>2 countries:</b><br>Somaliland, Taiwan                                    | Phase 1:<br>NCT05132855 (Taiwan).<br>NCT04487210 (Taiwan).<br>Phase 2:<br>NCT05132855 (Taiwan).<br>NCT04695652 (Taiwan, Vietnam).<br>NCT04822025 (Taiwan).<br>NCT04951388 (Taiwan).<br>NCT05038618 (Taiwan).<br>NCT05048849 (Taiwan).<br>NCT05054621 (Taiwan).<br>Phase 3: NCT05011526 (Paraguay) |
| 11 |                                                  |                                                         |                                                                              |                                                                                                                                                                                                                                                                                                   |
| 12 |                                                  |                                                         |                                                                              |                                                                                                                                                                                                                                                                                                   |
| 13 |                                                  |                                                         |                                                                              |                                                                                                                                                                                                                                                                                                   |
| 14 |                                                  |                                                         |                                                                              |                                                                                                                                                                                                                                                                                                   |
| 15 |                                                  |                                                         |                                                                              |                                                                                                                                                                                                                                                                                                   |
| 16 |                                                  |                                                         |                                                                              |                                                                                                                                                                                                                                                                                                   |
| 17 |                                                  |                                                         |                                                                              |                                                                                                                                                                                                                                                                                                   |
| 18 |                                                  |                                                         |                                                                              |                                                                                                                                                                                                                                                                                                   |
| 19 |                                                  |                                                         |                                                                              |                                                                                                                                                                                                                                                                                                   |
| 20 |                                                  |                                                         |                                                                              |                                                                                                                                                                                                                                                                                                   |
| 21 | <b>SpikoGen</b>                                  | Vaxine/CinnaGen Co. (Iran)                              | <b>1 country:</b><br>Iran                                                    | Phase 1: NCT04453852 (Australia).<br>Phase 2:<br>IRCT20150303021315N23 (Iran).<br>NCT04944368, IRCT20150303021315N23 (Iran).<br>NCT05148871 (Australia).<br>Phase 3: NCT05005559,<br>IRCT20150303021315N24 (Iran).<br>NCT05148871 (Australia).<br>NCT05175625, IRCT20150303021315N26 (Iran).      |
| 22 |                                                  |                                                         |                                                                              |                                                                                                                                                                                                                                                                                                   |
| 23 |                                                  |                                                         |                                                                              |                                                                                                                                                                                                                                                                                                   |
| 24 |                                                  |                                                         |                                                                              |                                                                                                                                                                                                                                                                                                   |
| 25 |                                                  |                                                         |                                                                              |                                                                                                                                                                                                                                                                                                   |
| 26 |                                                  |                                                         |                                                                              |                                                                                                                                                                                                                                                                                                   |
| 27 |                                                  |                                                         |                                                                              |                                                                                                                                                                                                                                                                                                   |
| 28 |                                                  |                                                         |                                                                              |                                                                                                                                                                                                                                                                                                   |
| 29 |                                                  |                                                         |                                                                              |                                                                                                                                                                                                                                                                                                   |
| 30 |                                                  |                                                         |                                                                              |                                                                                                                                                                                                                                                                                                   |
| 31 | <b>Corbevax</b>                                  | Biological E Limited (Telangana, India)                 | <b>1 country:</b><br>India                                                   | Phase 1: CTRI/2020/11/029032 (India).<br>Phase 2:<br>CTRI/2020/11/029032 (India).<br>CTRI/2021/06/034014 (India).<br>CTRI/2021/10/037066 (India).<br>Phase 3:<br>CTRI/2021/06/034014 (India).<br>CTRI/2021/08/036074 (India).<br>CTRI/2021/10/037066 (India).                                     |
| 32 |                                                  |                                                         |                                                                              |                                                                                                                                                                                                                                                                                                   |
| 33 |                                                  |                                                         |                                                                              |                                                                                                                                                                                                                                                                                                   |
| 34 |                                                  |                                                         |                                                                              |                                                                                                                                                                                                                                                                                                   |
| 35 |                                                  |                                                         |                                                                              |                                                                                                                                                                                                                                                                                                   |
| 36 |                                                  |                                                         |                                                                              |                                                                                                                                                                                                                                                                                                   |
| 37 |                                                  |                                                         |                                                                              |                                                                                                                                                                                                                                                                                                   |
| 38 |                                                  |                                                         |                                                                              |                                                                                                                                                                                                                                                                                                   |
| 39 | <b>Soberana 02</b>                               | Instituto Finlay de Vacunas Cuba (Havana, Cuba)         | <b>4 countries:</b><br>Cuba, Iran, Nicaragua, Venezuela                      | Phase 1: IFV/COR/06 (Cuba).<br>Phase 2: IFV/COR/08 (Cuba).<br>Phase 3: IFV/COR/09 (Cuba).                                                                                                                                                                                                         |
| 40 |                                                  |                                                         |                                                                              |                                                                                                                                                                                                                                                                                                   |
| 41 |                                                  |                                                         |                                                                              |                                                                                                                                                                                                                                                                                                   |
| 42 | <b>Soberana Plus</b>                             | Instituto Finlay de Vacunas Cuba (Havana, Cuba)         | <b>1 country:</b><br>Cuba                                                    | Phase 1:<br>IFV/COR/15 (Cuba).<br>IFV/COR/05 (Cuba).<br>Phase 2:<br>IFV/COR/11 (Cuba).<br>IFV/COR/15 (Cuba).<br>Phase 3: IFV/COR/09 (Cuba).                                                                                                                                                       |
| 43 |                                                  |                                                         |                                                                              |                                                                                                                                                                                                                                                                                                   |
| 44 |                                                  |                                                         |                                                                              |                                                                                                                                                                                                                                                                                                   |
| 45 |                                                  |                                                         |                                                                              |                                                                                                                                                                                                                                                                                                   |
| 46 |                                                  |                                                         |                                                                              |                                                                                                                                                                                                                                                                                                   |
| 47 |                                                  |                                                         |                                                                              |                                                                                                                                                                                                                                                                                                   |
| 48 | <b>Razi Cov Pars</b>                             | Razi Vaccine and Serum Research Institute (Karaj, Iran) | <b>1 country:</b><br>Iran                                                    | Phase 1: IRCT20201214049709N1 (Iran).<br>Phase 2: IRCT20201214049709N2 (Iran).<br>Phase 3: IRCT20201214049709N3 (Iran).                                                                                                                                                                           |
| 49 |                                                  |                                                         |                                                                              |                                                                                                                                                                                                                                                                                                   |
| 50 |                                                  |                                                         |                                                                              |                                                                                                                                                                                                                                                                                                   |
| 51 | <b>Recombinant SARS-CoV-2 Vaccine (CHO Cell)</b> | National Vaccine and Serum Institute (Beijing, China)   | <b>1 country:</b><br>United Arab Emirates                                    | Phase 1: NCT04869592 (China).<br>Phase 2: NCT04869592 (China).<br>Phase 3: NCT05069129 (United Arab Emirates)                                                                                                                                                                                     |
| 52 |                                                  |                                                         |                                                                              |                                                                                                                                                                                                                                                                                                   |
| 53 |                                                  |                                                         |                                                                              |                                                                                                                                                                                                                                                                                                   |
| 54 |                                                  |                                                         |                                                                              |                                                                                                                                                                                                                                                                                                   |
| 55 |                                                  |                                                         |                                                                              |                                                                                                                                                                                                                                                                                                   |
| 56 |                                                  |                                                         |                                                                              |                                                                                                                                                                                                                                                                                                   |
| 57 |                                                  |                                                         |                                                                              |                                                                                                                                                                                                                                                                                                   |
| 58 |                                                  |                                                         |                                                                              |                                                                                                                                                                                                                                                                                                   |
| 59 |                                                  |                                                         |                                                                              |                                                                                                                                                                                                                                                                                                   |
| 60 |                                                  |                                                         |                                                                              |                                                                                                                                                                                                                                                                                                   |
