# Supplementary material for: Covid-19: virology, variants, and vaccines
Source: PubMed Central journal article supplement — BMJ Med. 2022 Apr 1;1(1):e000040. doi: 10.1136/bmjmed-2021-000040 (PMC9951271; doi:10.1136/bmjmed-2021-000040), 2022-04-01
Supplement: bmjmed-2021-000040supp002.pdf [file bmjmed-2021-000040supp002.pdf]

| Vaccine and vaccine type                         | Recommended dose and administration                                                                             | Study ref.                                                                                 | Study type                  | Study date and location(s)                                                           | N            | Vaccine effectiveness % (95% confidence interval) * |                                |                        |  |  |
|--------------------------------------------------|-----------------------------------------------------------------------------------------------------------------|--------------------------------------------------------------------------------------------|-----------------------------|--------------------------------------------------------------------------------------|--------------|-----------------------------------------------------|--------------------------------|------------------------|--|--|
|                                                  |                                                                                                                 |                                                                                            |                             |                                                                                      |              | Vaccine efficacy against:                           | One dose                       | Two doses              |  |  |
| Pfizer/BioNTech (BNT162b2) – mRNA.               | Two doses (30µg, 0.3ml each) intramuscularly (deltoid) with a recommended interval of 21-28 days between doses. | (156)                                                                                      | Randomised controlled trial | 27/7/2020 to 14/11/2020<br>US, Argentina, Brazil, South Africa, Germany, and Turkey. | 37,706       | Symptomatic infection                               |                                | 95% (90.3–97.6%)       |  |  |
|                                                  |                                                                                                                 | (241)                                                                                      | Observational               | 20/12/2020 to 1/2/2021<br>Israel.                                                    | 1,193,236    | Documented infection                                | 46% (40-51%)                   | 92% (88-95%)           |  |  |
|                                                  |                                                                                                                 |                                                                                            |                             |                                                                                      |              | Symptomatic infection                               | 57% (50-63%)                   | 94% (87-98%)           |  |  |
|                                                  |                                                                                                                 |                                                                                            |                             |                                                                                      |              | Hospitalisation                                     | 74% (56-86%)                   | 87% (55-100%)          |  |  |
|                                                  |                                                                                                                 |                                                                                            |                             |                                                                                      |              | Severe disease                                      | 62% (39-80%)                   | 92% (75-100%)          |  |  |
|                                                  |                                                                                                                 | (242)                                                                                      | Test-negative case-control  | 26/10/2020 to 16/5/2021<br>UK.                                                       | 19,109       | Infection with Alpha                                | 47.5% (41.6–52.8%)             | 93.7% (91.6–95.3%)     |  |  |
|                                                  |                                                                                                                 |                                                                                            |                             |                                                                                      |              | Infection with Delta                                | 35.6% (22.7–46.4%)             | 88.0% (85.3–90.1%)     |  |  |
|                                                  |                                                                                                                 | (243)                                                                                      | Test-negative case-control  | 1/2/2021 to 31/3/2021<br>Qatar.                                                      | 213,758      | Infection with Beta                                 |                                | 75.0% (70.5-78.9%)     |  |  |
|                                                  |                                                                                                                 |                                                                                            |                             |                                                                                      |              | Infection with Alpha or Beta                        |                                | 97.4% (92.2-99.5%)     |  |  |
|                                                  |                                                                                                                 | (244)                                                                                      | Test-negative case-control  | 14/12/2020 to 19/4/2021<br>Canada.                                                   | 324,033      | Symptomatic infection                               | 14-20 days: 48% (41-54%)       | ≥7 days: 91% (89-93%)  |  |  |
|                                                  |                                                                                                                 |                                                                                            |                             |                                                                                      |              |                                                     | ≥14 days: 60% (57-64%)         |                        |  |  |
|                                                  |                                                                                                                 |                                                                                            |                             |                                                                                      |              |                                                     | 35-41 days: 71% (63-78%)       |                        |  |  |
|                                                  |                                                                                                                 |                                                                                            |                             |                                                                                      |              | Hospital admission or death                         | 14-20 days: 62% (44-75%)       | ≥7 days: 98% (88-100%) |  |  |
|                                                  |                                                                                                                 |                                                                                            |                             |                                                                                      |              |                                                     | ≥14 days: 70% (60-77%)         |                        |  |  |
|                                                  |                                                                                                                 |                                                                                            |                             |                                                                                      |              |                                                     | ≥35 days: 91% (73-97%)         |                        |  |  |
|                                                  |                                                                                                                 | [NOTE: Participants in this study received an mRNA vaccine (either BNT162b2 or mRNA-1273)] |                             |                                                                                      |              |                                                     |                                |                        |  |  |
|                                                  |                                                                                                                 | (245)                                                                                      | Test-negative case-control  | 14/12/2020 to 3/8/2021<br>Canada.                                                    | 682,071      | Symptomatic infection - Alpha                       | ≥14 days: 66% (95% CI: 64-68%) | ≥7 days: 89% (86–91%)  |  |  |
| Symptomatic infection - Beta or Gamma variants   | ≥14 days: 60% (52-67%)                                                                                          |                                                                                            |                             |                                                                                      |              | ≥7 days: 84% (69–92%)                               |                                |                        |  |  |
| Symptomatic infection - Delta                    | ≥14 days: 56% (45-64%)                                                                                          |                                                                                            |                             |                                                                                      |              | ≥7 days: 87% (64–95%)                               |                                |                        |  |  |
| Against hospitalisation or death - Alpha         | ≥14 days: 80% (78-82%)                                                                                          |                                                                                            |                             |                                                                                      |              | ≥7 days: 95% (92-97%)                               |                                |                        |  |  |
| Against hospitalisation or death - Beta or Gamma | ≥14 days: 77% (69-83%)                                                                                          |                                                                                            |                             |                                                                                      |              | ≥7 days: 95% (81-99%)                               |                                |                        |  |  |
| (246)                                            | Retrospective case-control                                                                                      | January to July 2021<br>US.                                                                | 119,463                     | Infection                                                                            |              | ≥14 days: 86% (81-90.6%)                            |                                |                        |  |  |
|                                                  |                                                                                                                 |                                                                                            |                             | Hospitalisation                                                                      |              | ≥14 days: 85% (73-93%)                              |                                |                        |  |  |
|                                                  |                                                                                                                 |                                                                                            |                             | Admission to an ICU                                                                  |              | ≥14 days: 87% (46-98.6%)                            |                                |                        |  |  |
| (133)                                            | Test-negative observational                                                                                     | 1/4/2021 to 6/6/2021<br>Scotland.                                                          | 400,827                     | Infection - Alpha                                                                    |              | 92% (90–93%)                                        |                                |                        |  |  |
|                                                  |                                                                                                                 |                                                                                            |                             | Infection - Delta                                                                    |              | 79% (75-82%)                                        |                                |                        |  |  |
| (247)                                            | Test-negative                                                                                                   | 12/4/2021 to                                                                               | 14,019                      | Hospitalisation - Alpha                                                              | 83% (62-93%) | 95% (78-99%)                                        |                                |                        |  |  |

|  |       |                               |                                        |                                           |  |                                 |                                |                              |
|--|-------|-------------------------------|----------------------------------------|-------------------------------------------|--|---------------------------------|--------------------------------|------------------------------|
|  |       |                               | case-control                           | 4/6/2021<br>England.                      |  | Hospitalisation - Delta         | 94% (46-99%)                   | 96% (86-99%)                 |
|  | (248) | Test-negative<br>case-control | 8/12/2020 to<br>19/2/2021.<br>England. | 156,930                                   |  | Infection                       |                                | 10-13 days: 70% (59-78%)     |
|  |       |                               |                                        |                                           |  |                                 |                                | ≥14 days: 89% (85-93%)       |
|  |       |                               |                                        |                                           |  |                                 |                                | 28-34 days: 61% (51-69%)     |
|  | (249) | Test-negative<br>case-control | 4/4/2021 to<br>1/5/2021<br>Canada.     | 16,993                                    |  | Infection                       | 0-13 days: 14% (0-26%)         |                              |
|  |       |                               |                                        |                                           |  |                                 | 14-20 days: 43% (30-53%)       |                              |
|  |       |                               |                                        |                                           |  |                                 | 35-41 days: 75% (63-83%)       |                              |
|  |       |                               |                                        |                                           |  | Infection                       |                                | ≥21 days: 65% (58-71%)       |
|  |       |                               |                                        |                                           |  | Infection - non-VOC             |                                | 72% (58-81%)                 |
|  |       |                               |                                        |                                           |  | Infection - Alpha               |                                | 67% (57-75%)                 |
|  |       |                               |                                        |                                           |  | Infection - Gamma               |                                | 61% (45-72%)                 |
|  | (250) | Test-negative<br>case-control | 17/1/2021 to<br>5/6/2021<br>Canada.    | 5,8476                                    |  | Infection                       | ≥14 days: 70.3% (68.1-72.4%)   | ≥7 days: 85.5% (80.4-89.3%)  |
|  | (251) | Case-control                  | 14/2/2021 to<br>3/5/2021<br>France.    | 67,760                                    |  | Infection                       |                                | ≥7 days: 88% (81-92%)        |
|  |       |                               |                                        |                                           |  | Infection - Alpha               |                                | ≥7 days: 86% (81-90%)        |
|  |       |                               |                                        |                                           |  | Infection - Beta/Gamma          |                                | ≥7 days: 77% (63-86%)        |
|  | (252) | Test-negative<br>case-control | 23/3/2021 to<br>7/9/2021<br>Qatar.     | 1 dose:<br>906,078<br>2 doses:<br>877,354 |  | Infection – Delta               | 65.5% (40.9-79.9%)             | ≥14 days: 59.6% (50.7-66.9%) |
|  |       |                               |                                        |                                           |  | Severe disease or death - Delta |                                | 97.3% (84.4-99.5%)           |
|  | (192) | Test-negative<br>case-control | 1/1/2021 to<br>5/9/2021<br>Qatar.      | 1 dose:<br>947,035<br>2 doses:<br>907,763 |  | Symptomatic infection           | 0-13 days: -5.5% (-12.9-1.4%)  |                              |
|  |       |                               |                                        |                                           |  |                                 | ≥14 days: 47.9% (43.6-51.9%)   |                              |
|  |       |                               |                                        |                                           |  |                                 | 1 month: 81.5% (79.9-83.0%)    |                              |
|  |       |                               |                                        |                                           |  |                                 | 2 months: 72.5% (69.6-75.1%)   |                              |
|  |       |                               |                                        |                                           |  |                                 | 3 months: 70.6% (66.4-74.3%)   |                              |
|  |       |                               |                                        |                                           |  |                                 | 4 months: 57.0% (48.6-64.0%)   |                              |
|  |       |                               |                                        |                                           |  |                                 | 5 months: 12.0% (-6.1-27.1%)   |                              |
|  |       |                               |                                        |                                           |  |                                 | 6 months: 12.8% (-9.1-30.3%)   |                              |
|  |       |                               |                                        |                                           |  |                                 | ≥7 months: 27.8% (-1.4-48.7%)  |                              |
|  |       |                               |                                        |                                           |  | Hospitalisation and death       | 0-13 days: 7.5% (-11.9-23.6%)  |                              |
|  |       |                               |                                        |                                           |  |                                 | ≥14 days: 65.0% (55.0-72.8%)   |                              |
|  |       |                               |                                        |                                           |  |                                 | 1 month: 95.9% (93.6-97.3%)    |                              |
|  |       |                               |                                        |                                           |  |                                 | 2 months: 96.3% (92.9-98.0%)   |                              |
|  |       |                               |                                        |                                           |  |                                 | 3 months: 93.4% (87.5-96.5%)   |                              |
|  |       |                               |                                        |                                           |  |                                 | 4 months: 80.8% (56.9-91.4%)   |                              |
|  |       |                               |                                        |                                           |  |                                 | 6 months: 81.8% (18.5-95.9%)   |                              |
|  |       |                               |                                        |                                           |  |                                 | ≥7 months: 44.1% (-86.5-83.3%) |                              |
|  | (253) | Prospective<br>cohort         | 7/12/2020 to<br>5/2/2021<br>UK.        | 23,324                                    |  | Infection                       | ≥21 days: 70% (55-85%)         | ≥7 days: 85% (74-96%)        |

|                        |                             |                                                                                                                       |               |                                                 |                                             |                                 |                              |
|------------------------|-----------------------------|-----------------------------------------------------------------------------------------------------------------------|---------------|-------------------------------------------------|---------------------------------------------|---------------------------------|------------------------------|
|                        |                             | (254)                                                                                                                 | Observational | 24/1/2021 to 3/4/2021 Israel.                   | 186,109                                     | Infection                       | ≥7 days: 95.3% (94.9-95.7%)  |
|                        |                             |                                                                                                                       |               |                                                 |                                             | Asymptomatic infection          | ≥7 days: 91.5% (90.7-92.2%)  |
|                        |                             |                                                                                                                       |               |                                                 |                                             | Symptomatic infection           | ≥7 days: 97.0% (96.7-97.2%)  |
|                        |                             |                                                                                                                       |               |                                                 |                                             | Hospitalisation                 | ≥7 days: 97.2% (96.8-97.5%)  |
|                        |                             |                                                                                                                       |               |                                                 |                                             | Severe or critical infection    | ≥7 days: 97.5% (97.1-97.8%)  |
|                        |                             |                                                                                                                       |               |                                                 |                                             | Death                           | ≥7 days: 96.7% (96.0-97.3%)  |
|                        |                             | (255)                                                                                                                 | Observational | 1/3/2021 to 1/8/2021 US.                        | 10,428, 783                                 | Infection – Pre-Delta period    | ≥14 days: 74.2% (68.9-78.7%) |
|                        |                             |                                                                                                                       |               |                                                 |                                             | Infection – Intermediate period | ≥14 days: 66.5% (58.3-73.1%) |
|                        |                             |                                                                                                                       |               |                                                 |                                             | Infection – Delta               | ≥14 days: 52.4% (48.0-56.4%) |
|                        |                             | (256)                                                                                                                 | Observational | 14/12/2020 to 14/8/2021 US.                     | Delta: 2,840<br>Pre-Delta: 7,012            | Infection – Delta               | 14–119 days: 85% (68-93%)    |
|                        |                             |                                                                                                                       |               |                                                 |                                             |                                 | 120–149 days: 81% (34-95%)   |
|                        |                             |                                                                                                                       |               |                                                 |                                             |                                 | ≥150 days: 73% (49-86%)      |
|                        |                             |                                                                                                                       |               |                                                 |                                             | Infection – Pre-Delta           | 91% (81-96%)                 |
|                        |                             | [NOTE only 65% of participants in this study received BNT162b2 (33% received mRNA-1273, and 2% received Ad26.COV2.S)] |               |                                                 |                                             |                                 |                              |
|                        |                             | (257)                                                                                                                 | Observational | 15/1/2021 to 16/4/2021 France.                  | 378                                         | Infection – Beta                | ≥7 days: 49% (14-69%)        |
|                        |                             |                                                                                                                       |               |                                                 |                                             | Severe disease                  | ≥7 days: 86% (67-94%)        |
|                        |                             | (258)                                                                                                                 | Observational | 1/12/2020 to 1/8/2021 UK.                       | 384,543                                     | Infection – Alpha               | ≥21 days: 59% (52-65%)       |
|                        |                             |                                                                                                                       |               |                                                 |                                             | Infection – Delta               | ≥21 days: 57% (50-63%)       |
|                        |                             |                                                                                                                       |               |                                                 |                                             | Infection – Alpha               | 0-13 days: 77% (66-84%)      |
|                        |                             |                                                                                                                       |               |                                                 |                                             |                                 | ≥14 days: 78% (68-84%)       |
|                        |                             |                                                                                                                       |               |                                                 |                                             | Infection – Delta               | 0-13 days: 82% (75-87%)      |
| ≥14 days: 80% (77-83%) |                             |                                                                                                                       |               |                                                 |                                             |                                 |                              |
| (259)                  | Observational               | April to May 2021. Canada                                                                                             | 224           | Infection                                       | 66.2% (2.3-88.3%)                           |                                 |                              |
|                        |                             |                                                                                                                       |               | Symptomatic infection                           | 25.6% (-157.8-78.5%)                        |                                 |                              |
| (260)                  | Retrospective cohort        | 27/12/2020 to 24/3/2021 Italy.                                                                                        | 6,423         | Infection                                       | 0-14 days: 47.3% (24.7-63.1%)               |                                 |                              |
|                        |                             |                                                                                                                       |               |                                                 | 14-21 days: 84.1% (39.7-95.8%)              |                                 |                              |
|                        |                             |                                                                                                                       |               |                                                 | ≥21 days: 85.4% (-35.3-98.4%)               |                                 |                              |
|                        |                             |                                                                                                                       |               | Symptomatic infection                           | 0-14 days: 39.9% (9.1-60.3%)                |                                 |                              |
|                        |                             |                                                                                                                       |               |                                                 | 14-21 days: 83.3% (14.8-96.7%)              |                                 |                              |
|                        |                             |                                                                                                                       |               |                                                 | ≥21 days: 65.9% (-171-95.7%)                |                                 |                              |
| (261)                  | Randomised controlled trial | 27/7/2020 to 29/10/2020 US, Argentina, Brazil, South Africa, Germany, Turkey                                          | 44,165        | Infection (without evidence of prior infection) | ≥7 days: 91.3% (89-93.2%)                   |                                 |                              |
|                        |                             |                                                                                                                       |               | Infection (with evidence of previous infection) | ≥7 days: 91.1% (88.8-93.0%)                 |                                 |                              |
|                        |                             |                                                                                                                       |               | Infection                                       | <11 days: 18.2% (-26.1-47.3%)               |                                 |                              |
|                        |                             |                                                                                                                       |               |                                                 | ≥11 days to second dose: 91.7% (79.6-97.4%) |                                 |                              |
|                        |                             |                                                                                                                       |               |                                                 | ≥7 days to <2 months: 96.2% (93.3-98.1%)    |                                 |                              |
|                        |                             |                                                                                                                       |               | ≥2 months to <4 months: 90.1%                   |                                             |                                 |                              |

|                                |                                |                                  |         |                                                            |                                       |                        |                               |
|--------------------------------|--------------------------------|----------------------------------|---------|------------------------------------------------------------|---------------------------------------|------------------------|-------------------------------|
|                                |                                |                                  |         |                                                            |                                       |                        | (86.6-92.9%)                  |
|                                |                                |                                  |         |                                                            |                                       |                        | ≥4 months: 83.7% (74.7-89.9%) |
| (262)                          | Retrospective cohort           | 20/12/2020 to 25/2/2021 Israel.  | 6,710   | Symptomatic Infection                                      | 7-21 days: 89% (83-94%)               | ≥7 days: 97% (94-99%)  |                               |
|                                |                                |                                  |         |                                                            |                                       |                        | ≥21 days: 98% (94-100%)       |
|                                |                                |                                  |         | Asymptomatic Infection                                     | 7-21 days: 36% (-51-69%)              | ≥7 days: 86% (69-93%)  |                               |
|                                |                                |                                  |         |                                                            |                                       |                        | ≥21 days: 94% (78-98%)        |
| (263)                          | Cohort                         | 27/12/2020 to 28/2/2021 Sweden.  | 805,741 | Infection                                                  | ≥14 days: 42% (14-63%)                | <7 days: 60% (27-81%)  |                               |
|                                |                                |                                  |         |                                                            |                                       |                        | ≥7 days: 86% (72-94%)         |
| (264)                          | Prospective cohort             | 27/12/2020 to 26/5/2021 Spain.   | 28,594  | Infection – Nursing home residents                         | 12 days: 20% (19.76-20.3%)            | 90.89% (90.84-90.95%)  |                               |
|                                |                                |                                  |         |                                                            | 40.28% (40.17-40.39)                  |                        |                               |
|                                |                                |                                  | 26,238  | Infection – Nursing home staff                             | 12 days: 20.27% (19.8-20.73%)         | 85.02% (84.86-85.17%)  |                               |
|                                |                                |                                  |         |                                                            | 26.49% (26.25-26.74%)                 |                        |                               |
|                                |                                |                                  | 61,951  | Infection – Healthcare workers                             | 12 days: 15.44% (15.19-15.68%)        | 94% (93.92-94.1%)      |                               |
|                                |                                |                                  |         |                                                            | 33.8% (33.66-33.92%)                  |                        |                               |
|                                |                                |                                  | 28,594  | Hospital admission - Nursing home residents                | 12 days: 67.59% (65.29-69.75%)        | 95.06% (94.73-95.38%)  |                               |
|                                |                                |                                  |         |                                                            | 46.24% (45.62-46.86%)                 |                        |                               |
| Death - Nursing home residents | 12 days: 43.95% (37.87-49.44%) |                                  |         |                                                            |                                       |                        |                               |
|                                |                                |                                  |         | 51.71% (51.17-52.23%)                                      | 96.73% (96.43-96.99)                  |                        |                               |
| (265)                          | Cohort                         | 27/12/2020 to 11/4/2021 Denmark. | 864,096 | Infection - Prioritised risk groups                        | 0-14 days: -72% (-80- -64%)           | 0-7 days: 42% (33-50%) |                               |
|                                |                                |                                  |         |                                                            | >14 days to second dose: 7% (-1-15%)  |                        | > 7 days: 82% (79-84%)        |
|                                |                                |                                  |         | COVID-19-related hospitalisation - Prioritised risk groups | 0-14 days: 54% (44-62%)               | 0-7 days: 90% (80-95%) |                               |
|                                |                                |                                  |         |                                                            | >14 days to second dose: 35% (18-49%) |                        | >7 days: 93% (89-96%)         |
|                                |                                |                                  |         | COVID-19-related death - Prioritised risk groups           | 0-14 days: 76% (68-82%)               | >7 days: 94% (90-96%)  |                               |
|                                |                                |                                  |         |                                                            | >14 to second dose days: 7% (-15-25%) |                        |                               |
|                                |                                |                                  |         |                                                            |                                       |                        |                               |
| (266)                          | Case-control                   | 27.1.2021 to 7/2/2021 Spain.     | 268     | Infection                                                  | 52.6% (95%CI: 1.1-77.3)               |                        |                               |
| (267)                          | Observational                  | 15/12/2020 to 3/2/2021 England.  | 170,226 | Infection                                                  | 21-27 days: 55.2% (40.8-66.8%)        |                        |                               |
|                                |                                |                                  |         | Emergency hospital attendance                              | 21-27 days: 57.8% (30.8-74.5%)        |                        |                               |
|                                |                                |                                  |         | Hospitalisation                                            | 21-27 days: 50.1% (19.9-69.5%)        |                        |                               |
| (268)                          | Cohort                         | 27/12/2020 to 10/3/2021 Spain.   | 299,209 | Infection (without evidence of prior infection)            | 0-14 days: 28.9% (26.9-31%)           |                        |                               |
|                                |                                |                                  |         |                                                            | 15-21 days: 51.9% (50.7-53.1%)        |                        |                               |
|                                |                                |                                  |         |                                                            | 22-28 days: 62.9% (61.9-64%)          |                        |                               |
|                                |                                |                                  |         |                                                            | ≥29 days: 81.8% (81.0-82.7%)          |                        |                               |
|                                |                                |                                  |         | Infection (with evidence of prior infection)               | 0-14 days: 9.6% (-6.9-26.8%)          |                        |                               |
|                                |                                |                                  |         |                                                            | 15-21 days: 25.5% (15.1-36.6%)        |                        |                               |
|                                |                                |                                  |         |                                                            | 22-28 days: 34.6% (25.7-44.1%)        |                        |                               |
|                                |                                |                                  |         |                                                            | ≥29 days: 56.8% (47.1-67.7%)          |                        |                               |

|                                                                                              |                                   |                                                                        |                                             |                                              |                                |                                                                                      |                                                               |                          |                                |                        |
|----------------------------------------------------------------------------------------------|-----------------------------------|------------------------------------------------------------------------|---------------------------------------------|----------------------------------------------|--------------------------------|--------------------------------------------------------------------------------------|---------------------------------------------------------------|--------------------------|--------------------------------|------------------------|
|                                                                                              |                                   | (269)                                                                  | Observational                               | 1/12/2020 to 8/5/2021 UK.                    | 383,812                        | Infection                                                                            | 8-20 days after either dose: 56% (51-61%)                     |                          |                                |                        |
|                                                                                              |                                   |                                                                        |                                             |                                              |                                |                                                                                      | ≥21 days: 64% (59-68%)                                        | ≥21 days: 80% (74-84%)   |                                |                        |
|                                                                                              |                                   | [NOTE: Both BNT162b2 and AZD1222 vaccines were included in this study] |                                             |                                              |                                |                                                                                      |                                                               |                          |                                |                        |
|                                                                                              |                                   | (270)                                                                  | Cohort                                      | 19/12/2020 to 14/3/2021 Israel.              | 9,347                          | Infection                                                                            | 4-10 days: 28% (-18-57%)                                      |                          | ≥11 days: 65% (45-79%)         |                        |
|                                                                                              |                                   |                                                                        |                                             |                                              |                                |                                                                                      | ≥11 days after first, ≤10 days after second: 55% (32-70%)     |                          |                                |                        |
|                                                                                              |                                   |                                                                        |                                             |                                              |                                |                                                                                      | Symptomatic infection                                         | 4-10 days: 21% (-32-41%) |                                | ≥11 days: 90% (84-94%) |
|                                                                                              |                                   | ≥11 days after first, ≤10 days after second: 80% (69-87%)              |                                             |                                              |                                |                                                                                      |                                                               |                          |                                |                        |
|                                                                                              |                                   | (271)                                                                  | Prospective cohort                          | 8/12/2020 to 15/3/2021 England.              | 10,412                         | Infection                                                                            | 0-6 days: 36% (-6-62%)                                        |                          |                                |                        |
|                                                                                              |                                   |                                                                        |                                             |                                              |                                |                                                                                      | 7-13 days: 17% (-28-46%)                                      |                          |                                |                        |
|                                                                                              |                                   |                                                                        |                                             |                                              |                                |                                                                                      | 14-20 days: 4% (-60-43%)                                      |                          |                                |                        |
|                                                                                              |                                   |                                                                        |                                             |                                              |                                |                                                                                      | 21-27 days: 8% (-59-47%)                                      |                          |                                |                        |
|                                                                                              |                                   |                                                                        |                                             |                                              |                                |                                                                                      | 28-34 days: 56% (19-76%)                                      |                          |                                |                        |
|                                                                                              |                                   |                                                                        |                                             |                                              |                                |                                                                                      | 35-48 days: 62% (23-81%)                                      |                          |                                |                        |
|                                                                                              |                                   |                                                                        |                                             |                                              |                                |                                                                                      | ≥49 days: 51% (-17-80%)                                       |                          |                                |                        |
|                                                                                              |                                   | [NOTE: Both BNT162b2 and AZD1222 vaccines were included in this study] |                                             |                                              |                                |                                                                                      |                                                               |                          |                                |                        |
|                                                                                              |                                   | (272)                                                                  | Retrospective cohort                        | 1/1/2021 to 31/3/2021 US.                    | 44,498                         | Infection                                                                            | >14 days after first, ≤14 days after second: 78.1% (71.1-82%) |                          |                                |                        |
|                                                                                              |                                   |                                                                        |                                             |                                              |                                |                                                                                      |                                                               |                          | >14 days: 96.8% (95.3-97.8%)   |                        |
|                                                                                              |                                   | (273)                                                                  | Prospective cohort                          | 14/12/2020 to 10/4/2021 US.                  | 3,975                          | Infection                                                                            | ≥14 days after first, <14 days after second: 80% (60-90%)     |                          |                                |                        |
|                                                                                              |                                   |                                                                        |                                             |                                              |                                |                                                                                      |                                                               |                          | ≥14 days: 93% (78-98%)         |                        |
|                                                                                              |                                   | (274)                                                                  | Randomised controlled trial                 | 15/10/2020 to 12/1/2021 US.                  | 2,260                          | Infection - Adolescents (12-15 years of age) - (without evidence of prior infection) | ≥7 days: 100% (75.3-100%)                                     |                          |                                |                        |
| Infection - Adolescents (12-15 years of age) - (with or without evidence of prior infection) | ≥7 days: 100% (78.1-100%)         |                                                                        |                                             |                                              |                                |                                                                                      |                                                               |                          |                                |                        |
| (275)                                                                                        | Retrospective cohort              | 19/7/2021 to 13/11/2021 South Korea.                                   | 444,313                                     | Infection – Adolescents (16-18 years of age) | ≥14 days: 91.1% (89.6-92.5%)   |                                                                                      | ≥14 days: 99.1% (98.5-99.5%)                                  |                          |                                |                        |
| (276)                                                                                        | Prospective cohort                | 25/7/2021 to 4/12/2021 US.                                             | 243                                         | Infection - Adolescents (12-17 years of age) | ≥14 days: 92% (79-97%)         |                                                                                      |                                                               |                          |                                |                        |
| (277)                                                                                        | Retrospective longitudinal cohort | 21/12/2020 to 6/2/2021 Israel.                                         | 5,439,734 first dose, 5,112,516 second dose | Infection                                    | 14-20 days: 54.3% (50.6-57.8%) |                                                                                      | 8-14 days: 89.9% (88.6-91.1%)                                 |                          |                                |                        |
|                                                                                              |                                   |                                                                        |                                             | Symptomatic infection                        | 14-20 days: 58.3% (54.7-61.6%) |                                                                                      | 8-14 days: 93.6% (92.7-94.3%)                                 |                          |                                |                        |
|                                                                                              |                                   |                                                                        |                                             | Hospitalisation                              | 14-20 days: 74.5% (69.1-79%)   |                                                                                      | 8-14 days: 93.8% (91.9-95.2%)                                 |                          |                                |                        |
|                                                                                              |                                   |                                                                        |                                             | Severe/Critical disease                      | 14-20 days: 77.3% (71.2-82.1%) |                                                                                      | 8-14 days: 94.4% (92.6-95.8%)                                 |                          |                                |                        |
|                                                                                              |                                   |                                                                        |                                             | Death                                        | 14-20 days: 71.7% (64.1-77.7%) |                                                                                      | 8-14 days: 91.3% (87.4-94.0%)                                 |                          |                                |                        |
|                                                                                              |                                   |                                                                        |                                             | Infection                                    |                                |                                                                                      |                                                               |                          | 15-21 days: 96.8% (96.1-97.4%) |                        |
|                                                                                              |                                   |                                                                        |                                             | Symptomatic infection                        |                                |                                                                                      |                                                               |                          | 15-21 days: 98.1% (97.7-98.5%) |                        |
|                                                                                              |                                   |                                                                        |                                             | Hospitalisation                              |                                |                                                                                      |                                                               |                          | 15-21 days: 98% (97.1-98.6%)   |                        |
| Severe/Critical disease                                                                      |                                   |                                                                        |                                             |                                              | 15-21 days: 98.6% (97.8-99.1%) |                                                                                      |                                                               |                          |                                |                        |

|       |                            |                                                                                                                 |           |                                                                                                  |                              |                                |
|-------|----------------------------|-----------------------------------------------------------------------------------------------------------------|-----------|--------------------------------------------------------------------------------------------------|------------------------------|--------------------------------|
|       |                            |                                                                                                                 |           |                                                                                                  | Death                        | 15-21 days: 97.7% (95.9-98.7%) |
|       |                            |                                                                                                                 |           |                                                                                                  | Infection                    | 22-28 days: 97.3% (96.7-97.8%) |
|       |                            |                                                                                                                 |           |                                                                                                  | Symptomatic infection        | 22-28 days: 97.9% (97.4-98.3%) |
|       |                            |                                                                                                                 |           |                                                                                                  | Hospitalisation              | 22-28 days: 99% (98.4-99.3%)   |
|       |                            |                                                                                                                 |           |                                                                                                  | Severe/Critical disease      | 22-28 days: 99.2% (98.6-99.5%) |
|       |                            |                                                                                                                 |           |                                                                                                  | Death                        | 22-28 days: 98.6% (97-99.3%)   |
| (278) | Test-negative case-control | January to March 2021 US.                                                                                       | 1,843     | Infection                                                                                        | ≥14 days: 81.7% (74.3-86.9%) | ≤2 days: 81.7% (74.3-86.9%)    |
|       |                            |                                                                                                                 |           |                                                                                                  |                              | 3-6 days: 81.7% (74.3-86.9%)   |
|       |                            |                                                                                                                 |           |                                                                                                  |                              | ≥7 days: 93.5% (86.5-96.9%)    |
|       |                            |                                                                                                                 |           | [NOTE: 76% of case-patients and 78% of controls received BNT162b2, remainder received mRNA-1273] |                              |                                |
| (279) | Prospective cohort         | January to April 2021 Spain.                                                                                    | 20,961    | Infection                                                                                        | 21% (3-36%)                  | 65% (56-73%)                   |
|       |                            |                                                                                                                 |           | Symptomatic infection                                                                            | 30% (10-45%)                 | 82% (73-88%)                   |
|       |                            |                                                                                                                 |           | Symptomatic infection – 18-59 years old                                                          | 50% (12-72%)                 | 85% (74-91%)                   |
|       |                            |                                                                                                                 |           | Symptomatic infection - ≥60 years old                                                            | 20% (-7-40%)                 | 76% (55-87%)                   |
|       |                            |                                                                                                                 |           | Hospitalisation                                                                                  | 65% (25-83%)                 | 94% (60-99%)                   |
| (280) | Prospective cohort         | 8/10/2020 to 22/2/2021 Scotland.                                                                                | 409,588   | Hospitalisation                                                                                  | 0-6 days: 86% (81-90%)       |                                |
|       |                            |                                                                                                                 |           |                                                                                                  | 7-13 days: 53% (45-59%)      |                                |
|       |                            |                                                                                                                 |           |                                                                                                  | 14-20 days: 69% (62-75%)     |                                |
|       |                            |                                                                                                                 |           |                                                                                                  | 21-27 days: 78% (71-83%)     |                                |
|       |                            |                                                                                                                 |           |                                                                                                  | 28-34 days: 91% (85-94%)     |                                |
|       |                            |                                                                                                                 |           |                                                                                                  | 35-41 days: 78% (69-85%)     |                                |
|       |                            |                                                                                                                 |           |                                                                                                  | ≥42 days: 77% (68-83%)       |                                |
| (281) | Test-negative case-control | 27/12/2020 to 30/6/2021 Belgium, Croatia, Czechia, France, Greece, Ireland, Luxembourg, Malta, Portugal, Spain. | 1,893     | Infection                                                                                        | ≥14 days: 76% (61-86%)       | ≥14 days: 94% (88-97%)         |
| (282) | Prospective cohort         | 1/5/2021 to 3/9/2021 US.                                                                                        | 8,690,825 | Infection - 18-49 years old                                                                      |                              | ≥14 days: 93.3% (92.2-94.4%)   |
|       |                            |                                                                                                                 |           | Infection - 50-64 years old                                                                      |                              | ≥14 days: 95.0% (94.0-96.0%)   |
|       |                            |                                                                                                                 |           | Infection - ≤65 years old                                                                        |                              | ≥14 days: 91.4% (90.0-92.8%)   |
|       |                            |                                                                                                                 |           | Hospitalisation - 18-49 years old                                                                |                              | ≥14 days: 96.1% (94.1-97.6%)   |
|       |                            |                                                                                                                 |           | Hospitalisation - 50-64 years old                                                                |                              | ≥14 days: 95.6% (94.2-96.7%)   |
|       |                            |                                                                                                                 |           | Hospitalisation - ≤65 years old                                                                  |                              | ≥14 days: 94.8% (94.0-95.5%)   |
| (283) | Test-negative case-control | 1/7/2021 to 25/10/2021 US.                                                                                      | 1,222     | Hospitalisation 12-18 years old                                                                  | 97% (86-100%)                | ≥14 days: 94% (90-96%)         |
|       |                            |                                                                                                                 |           | ICU admission – 12-18 years old                                                                  |                              | ≥14 days: 98% (93-99%)         |
|       |                            |                                                                                                                 |           | Life support – 12-18 years old                                                                   |                              | ≥14 days: 98% (92-100%)        |
| (284) | Test-negative              | 1/7/2021 to                                                                                                     | 283       | COVID-19 multisystem inflammatory                                                                |                              | ≥14 days: 92% (77-97%)         |

|                                                                                                      |                                                                                                       |                             | case-control                | 9/12/2021<br>US.                                                       |                                           | syndrome – 12-18 years old              |                    |                          |
|------------------------------------------------------------------------------------------------------|-------------------------------------------------------------------------------------------------------|-----------------------------|-----------------------------|------------------------------------------------------------------------|-------------------------------------------|-----------------------------------------|--------------------|--------------------------|
| <b>Oxford University/ AstraZeneca (AZD1222) - Non-replicating adenovirus viral vector (ChAdOx1).</b> | Two doses (0.5ml each) intramuscularly (deltoid) with a recommended interval window of 8 to 12 weeks. | (242)                       | Test-negative case-control  | 26/10/2020 to 16/5/2021 UK.                                            | 19,109                                    | Infection - Alpha                       | 48.7% (45.2–51.9%) | 74.5% (68.4–79.4%)       |
|                                                                                                      |                                                                                                       |                             |                             |                                                                        |                                           | Infection - Delta                       | 30.0% (24.3–35.3%) | 67.0% (61.3–71.8%)       |
|                                                                                                      |                                                                                                       | (245)                       | Test-negative case-control  | 14/12/2020 to 3/8/2021 Canada.                                         | 682,071                                   | Symptomatic infection - Alpha           | 64% (60-68%)       |                          |
|                                                                                                      |                                                                                                       |                             |                             |                                                                        |                                           | Symptomatic infection – Beta or Gamma   | 48% (28-63%)       |                          |
|                                                                                                      |                                                                                                       |                             |                             |                                                                        |                                           | Symptomatic infection - Delta           | 67% (44-80%)       |                          |
|                                                                                                      |                                                                                                       |                             |                             |                                                                        |                                           | Hospitalisation or death - Alpha        | 85% (81-88%)       |                          |
|                                                                                                      |                                                                                                       |                             |                             |                                                                        |                                           | Hospitalisation or death – Bet or Gamma | 83% (66-92%)       |                          |
|                                                                                                      |                                                                                                       |                             |                             |                                                                        |                                           | Hospitalisation or death - Delta        | 88% (60-96%)       |                          |
|                                                                                                      |                                                                                                       | (133)                       | Test-negative observational | 1/4/2021 to 6/6/2021 Scotland.                                         | 462,755                                   | Infection with Alpha variant            |                    | 73% (66-78%)             |
|                                                                                                      |                                                                                                       |                             |                             |                                                                        |                                           | Infection with Delta variant            |                    | 60% (53-66%)             |
|                                                                                                      |                                                                                                       | (285)                       | Randomised controlled trial | 1/10/2020 to 14/1/2021 UK.                                             | 8,534                                     | Symptomatic infection – Alpha           |                    | 70.4% (43.6-84%)         |
|                                                                                                      |                                                                                                       |                             |                             |                                                                        |                                           | Symptomatic infection – non-Alpha       |                    | 81.5% (67.9-89.4%)       |
|                                                                                                      |                                                                                                       | (286)                       | Randomised controlled trial | 28/8/2020 to 5/3/2021 US.                                              | 32,449                                    | Symptomatic infection                   |                    | 79%                      |
|                                                                                                      |                                                                                                       |                             |                             |                                                                        |                                           | Severe disease or hospitalisation       |                    | 100%                     |
|                                                                                                      |                                                                                                       | (247)                       | Test-negative case-control  | 12/4/2021 to 4/6/2021 England.                                         | 14,019                                    | Hospitalisation – Alpha                 | 76% (61-85%)       | 86% (53-96%)             |
|                                                                                                      |                                                                                                       |                             |                             |                                                                        |                                           | Hospitalisation – Delta                 | 71% (51-83%)       | 92% (75-97%)             |
|                                                                                                      |                                                                                                       | (287)                       | Randomised controlled trial | 23/4/2020 to 4/11/2020 UK, Brazil.                                     | 11,636                                    | Infection                               |                    | 62.1% (41.0-75.7%)       |
|                                                                                                      |                                                                                                       | (288)                       | Randomised controlled trial | 24/6/2020 to 9/11/2020 South Africa.                                   | 2,026                                     | Symptomatic infection                   |                    | 21.9% (-49.9-59.8%)      |
|                                                                                                      |                                                                                                       |                             |                             |                                                                        |                                           | Symptomatic infection - Beta            |                    | 10.4% (-76.8-54.8%)      |
|                                                                                                      |                                                                                                       | (248)                       | Test-negative case-control  | 8/12/2020 to 19/2/2021. England.                                       | 156,930                                   | Symptomatic infection                   |                    | 28-34 days: 60% (41-73%) |
|                                                                                                      |                                                                                                       |                             |                             |                                                                        |                                           | ≥35 days: 73% (27-90%)                  |                    |                          |
| (258)                                                                                                | Observational                                                                                         | 1/12/2020 to 1/8/2021 UK.   | 384,543                     | Infection - Alpha                                                      | ≥21 days: 63% (55–69%)                    | 0-13 days: 72% (50-84%)                 |                    |                          |
|                                                                                                      |                                                                                                       |                             |                             |                                                                        |                                           | ≥14 days: 79% (56–90%)                  |                    |                          |
|                                                                                                      |                                                                                                       |                             |                             | Infection Delta                                                        | ≥21 days: 46% (35–55%)                    | 0-13 days: 71% (64–77%)                 |                    |                          |
|                                                                                                      |                                                                                                       |                             |                             |                                                                        |                                           | ≥14 days: 67% (62–71%)                  |                    |                          |
| (289)                                                                                                | Test-negative case-control                                                                            | 1/3/2021 to 31/5/2021 India | 720                         | Infection                                                              | 49% (17-68%)                              | 54% (27-71%)                            |                    |                          |
|                                                                                                      |                                                                                                       |                             |                             | Symptomatic infection                                                  | 58% (28-75%)                              | 64% (38-78%)                            |                    |                          |
|                                                                                                      |                                                                                                       |                             |                             | Moderately severe disease                                              | Any dosage >3 weeks ago: 95% (44-100%)    |                                         |                    |                          |
| (269)                                                                                                | Observational                                                                                         | 1/12/2020 to 8/5/2021 UK.   | 383,812                     | Infection                                                              | 8-20 days after either dose: 56% (51-61%) |                                         |                    |                          |
|                                                                                                      |                                                                                                       |                             |                             |                                                                        | ≥21 days: 64% (59-68%)                    | ≥21 days: 80% (74-84%)                  |                    |                          |
|                                                                                                      |                                                                                                       |                             |                             | [NOTE: Both BNT162b2 and AZD1222 vaccines were included in this study] |                                           |                                         |                    |                          |
| (290)                                                                                                | Randomised                                                                                            | 28/8/2020 to                | 32,451                      | Symptomatic infection                                                  |                                           | ≥15 days: 74.0% (65.3-80.5%)            |                    |                          |

|  |       |                                  |                  |                                                           |        |                                                                              |                                                    |                                                  |
|--|-------|----------------------------------|------------------|-----------------------------------------------------------|--------|------------------------------------------------------------------------------|----------------------------------------------------|--------------------------------------------------|
|  |       |                                  | controlled trial | 15/1/2021<br>US, Chile, Peru.                             |        | Severe or critical infection                                                 |                                                    | ≥15 days: 100.0% (71.6-NE%)                      |
|  |       |                                  |                  |                                                           |        | Emergency department visit                                                   |                                                    | ≥15 days: 94.8% (59.0-99.3%)                     |
|  |       |                                  |                  |                                                           |        | Hospitalisation                                                              |                                                    | ≥15 days: 94.2% (53.3-99.3%)                     |
|  |       |                                  |                  |                                                           |        | ICU admission                                                                |                                                    | ≥15 days: 100.0 (-1781.6-NE%)                    |
|  | (291) | Clinical trial                   |                  | 23/6/2020 to<br>1/12/2020<br>Brazil.                      | 9433   | Infection – B.1.1.33                                                         |                                                    | 88.2 (5.4, 98.5)                                 |
|  |       |                                  |                  |                                                           |        | Infection – B.1.1.28                                                         |                                                    | 72.6% (46.4-86.0%)                               |
|  |       |                                  |                  |                                                           |        | Infection – Zeta                                                             |                                                    | 68.7% (54.9-78.3%)                               |
|  |       |                                  |                  |                                                           |        | Infection – Gamma                                                            |                                                    | 63.6% (-2.1-87.0%)                               |
|  |       |                                  |                  |                                                           |        | Infection – Undetermined variant                                             |                                                    | 56.6% (28.2-73.8%)                               |
|  |       |                                  |                  |                                                           |        | Hospitalisation – Any variant                                                |                                                    | 95% (61-99%)                                     |
|  | (292) | Meta-analysis                    |                  | 23/4/2020 to<br>6/12/2020<br>UK, Brazil,<br>South Africa. | 17,178 | Asymptomatic infection                                                       |                                                    | ≥14 days: 22.2% (-9-45%)                         |
|  |       |                                  |                  |                                                           |        | Symptomatic infection                                                        |                                                    | ≥14 days: 66.7% (57.4-74%)                       |
|  |       |                                  |                  |                                                           |        | Asymptomatic infection - <6 weeks<br>prime-boost interval (standard doses)   |                                                    | ≥14 days: -11.8% (-189.5-<br>56.8%)              |
|  |       |                                  |                  |                                                           |        | Asymptomatic infection - 6-8 weeks<br>prime-boost interval (standard doses)  |                                                    | ≥14 days: -74.2% (-330.3-<br>29.5%)              |
|  |       |                                  |                  |                                                           |        | Asymptomatic infection – 9-11 weeks<br>prime-boost interval (standard doses) |                                                    | ≥14 days: 39.9% (-62.3-77.8%)                    |
|  |       |                                  |                  |                                                           |        | Asymptomatic infection - ≥12 weeks<br>prime-boost interval (standard doses)  |                                                    | ≥14 days: 22.8% (-63.3-63.5%)                    |
|  |       |                                  |                  |                                                           |        | Symptomatic infection - <6 weeks prime-<br>boost interval (standard doses)   |                                                    | ≥14 days: 55.1% (33-69.9%)                       |
|  |       |                                  |                  |                                                           |        | Symptomatic infection - 6-8 weeks<br>prime-boost interval (standard doses)   |                                                    | ≥14 days: 59.9% (32-76.4%)                       |
|  |       |                                  |                  |                                                           |        | Symptomatic infection – 9-11 weeks<br>prime-boost interval (standard doses)  |                                                    | ≥14 days: 63.7% (28-81.7%)                       |
|  |       |                                  |                  |                                                           |        | Symptomatic infection - ≥12 weeks<br>prime-boost interval (standard doses)   |                                                    | ≥14 days: 81.3% (60.3-91.2%)                     |
|  | (293) | Cross-sectional<br>observational |                  | 1/5/2021 to<br>31/5/2021<br>India.                        | 583    | Infection                                                                    | <14 days: 15% (-68-57%)<br>≥14 days: 44% (7-66%)   | <14 days: 66% (34-81%)<br>≥14 days: 83% (73-89%) |
|  |       |                                  |                  |                                                           |        | Hospitalisation                                                              | <14 days: 43% (-68-81%)<br>≥14 days: 76% (21-92%)  | <14 days: 83% (17-96%)<br>≥14 days: 88% (55-97%) |
|  |       |                                  |                  |                                                           |        | ICU admission or death                                                       | <14 days: 62% (-27-89%)<br>≥14 days: 53% 9-29-83%) | <14 days: 93% (35-99%)<br>≥14 days: 93% (64-99%) |
|  |       |                                  |                  |                                                           |        | [NOTE: Participants either received Covaxin or Covishield (AZD1222)]         |                                                    |                                                  |
|  | (279) | Prospective<br>cohort            |                  | January to April<br>2021<br>Spain.                        | 20,961 | Infection                                                                    | 44% (31-54%)                                       |                                                  |
|  |       |                                  |                  |                                                           |        | Symptomatic infection                                                        | 50% (37-61%)                                       |                                                  |
|  |       |                                  |                  |                                                           |        | Symptomatic infection – 18-59 years old                                      | 50% (34-62%)                                       |                                                  |
|  |       |                                  |                  |                                                           |        | Symptomatic infection - ≥60 years old                                        | 53% (19-72%)                                       |                                                  |
|  |       |                                  |                  |                                                           |        | Hospitalisation                                                              | 92% (46-99%)                                       |                                                  |
|  | (294) | Retrospective<br>cohort          |                  | 1/6/2020 to<br>31/5/2021                                  | 11,405 | Infection (with evidence of prior<br>infection)                              |                                                    | ≥14 days: 91.1% (84.1-94.9%)                     |

|                                                                                                                         |                                             |       |                             |                                                                                            |             |                                                                                      |                                 |                               |
|-------------------------------------------------------------------------------------------------------------------------|---------------------------------------------|-------|-----------------------------|--------------------------------------------------------------------------------------------|-------------|--------------------------------------------------------------------------------------|---------------------------------|-------------------------------|
|                                                                                                                         |                                             |       |                             | India.                                                                                     |             | Infection (without evidence of prior infection)                                      |                                 | ≥14 days: 31.8% (23.5-39.1%)  |
|                                                                                                                         |                                             |       |                             |                                                                                            |             | [NOTE: 5.77% of participants received Covaxin, 94.23% received Covishield (AZD1222)] |                                 |                               |
|                                                                                                                         |                                             | (280) | Prospective cohort          | 8/10/2020 to 22/2/2021 Scotland                                                            | 409,588     | Hospitalisation                                                                      | 0-6 days: 72% (66-77%)          |                               |
|                                                                                                                         |                                             |       |                             |                                                                                            |             |                                                                                      | 7-13 days: 68% (61-73%)         |                               |
|                                                                                                                         |                                             |       |                             |                                                                                            |             |                                                                                      | 14-20 days: 73% (66-79%)        |                               |
|                                                                                                                         |                                             |       |                             |                                                                                            |             |                                                                                      | 21-27 days: 81% (72-87%)        |                               |
|                                                                                                                         |                                             |       |                             |                                                                                            |             |                                                                                      | 28-34 days: 88% (75-94%)        |                               |
|                                                                                                                         |                                             |       |                             |                                                                                            |             |                                                                                      | 35-41 days: 97% (63-100%)       |                               |
|                                                                                                                         |                                             |       |                             |                                                                                            |             |                                                                                      | ≥42 days: 59% (-296-96%)        |                               |
|                                                                                                                         |                                             | (295) | Cohort                      | 17/1/2021 to 11/5/2021 Brazil.                                                             | 313,328     | Death                                                                                | ≥21 days: 94.4% (93.9-94.8%)    | ≥21 days: 99.8 (99.6-99.9%)   |
|                                                                                                                         |                                             |       |                             |                                                                                            |             | Death – 75-79 years old                                                              | ≥21 days: 88% (85.8-90%)        |                               |
|                                                                                                                         |                                             |       |                             |                                                                                            |             | Death – 80-89 years old                                                              | ≥21 days: 96.8% (96.5-97.2%)    |                               |
|                                                                                                                         |                                             |       |                             |                                                                                            |             | Death - ≥90 years old                                                                | ≥21 days: 99.2% (99.1-99.4%)    |                               |
|                                                                                                                         |                                             | (296) | Retrospective cohort        | 18/1/2021 to 30/6/2021 Brazil.                                                             | 60,577, 870 | Infection                                                                            | ≥14 days: 34% (33.2-34.7%)      | 0-13 days: 56.9% (55.3-58.5%) |
|                                                                                                                         |                                             |       |                             |                                                                                            |             |                                                                                      |                                 | ≥14 days: 70% (68.6-71.3%)    |
|                                                                                                                         |                                             |       |                             |                                                                                            |             | Hospitalisation                                                                      | ≥14 days: 52.2% (50.9-53.4%)    | 0-13 days: 69.6% (67.2-71.8%) |
|                                                                                                                         |                                             |       |                             |                                                                                            |             |                                                                                      |                                 | ≥14 days: 86.8% (85.2-88.2%)  |
|                                                                                                                         |                                             |       |                             |                                                                                            |             | ICU admission                                                                        | ≥14 days: 54% (51.8-56%)        | 0-13 days: 69.2% (65-72.8%)   |
|                                                                                                                         |                                             |       |                             |                                                                                            |             |                                                                                      |                                 | ≥14 days: 88.1% (85.4-90.3%)  |
|                                                                                                                         |                                             |       |                             |                                                                                            |             | Death                                                                                | ≥14 days: 49.3% (47-51.5%)      | 0-13 days: 72.1% (69.1-74.9%) |
|                                                                                                                         |                                             |       |                             |                                                                                            |             |                                                                                      |                                 | ≥14 days: 90.2% (88.3-91.8%)  |
| <b>Johnson &amp; Johnson (Ad26.COV2.S)</b> - Recombinant, replication-incompetent adenovirus serotype 26 (Ad26) vector. | One dose (0.5ml) intramuscularly (deltoid). | (172) | Randomised controlled trial | 21/9/2020 to 22/1/2021 Argentina, Brazil, Chile, Colombia, Mexico, Peru, South Africa, US. | 39,321      | Moderate to severe-critical infection                                                | ≥14 days: 66.9% (59.0-73.4%)    |                               |
|                                                                                                                         |                                             |       |                             |                                                                                            |             |                                                                                      | ≥28 days: 66.1% (55.0-74.8%)    |                               |
|                                                                                                                         |                                             |       |                             |                                                                                            |             | Severe-critical infection                                                            | ≥14 days: 76.7% (54.6-89.1%)    |                               |
|                                                                                                                         |                                             |       |                             |                                                                                            |             |                                                                                      | ≥28 days: 85.4% (54.2-96.9%)    |                               |
|                                                                                                                         |                                             | (297) | Test-negative case-control  | 25/6/2021 to 30/9/2021 Brazil.                                                             | 11,817      | Symptomatic infection                                                                | 14-27 days: 27.4% (8.7-42.7%)   |                               |
|                                                                                                                         |                                             |       |                             |                                                                                            |             |                                                                                      | ≥28 days: 50.9% (35.5-63.0%)    |                               |
|                                                                                                                         |                                             |       |                             |                                                                                            |             | Hospitalisation                                                                      | 14-27 days: 33.5% (-29.1-69.8%) |                               |
|                                                                                                                         |                                             |       |                             |                                                                                            |             |                                                                                      | ≥28 days: 72.9% (35.1-91.1%)    |                               |
|                                                                                                                         |                                             |       |                             |                                                                                            |             | Admission to an ICU                                                                  | 14-27 days: 56.0% (-52.8-93.1%) |                               |
|                                                                                                                         |                                             |       |                             |                                                                                            |             |                                                                                      | ≥28 days: 92.5% (54.9-99.6%)    |                               |
| Mechanical ventilation                                                                                                  | 14-27 days: 65.2% (-74.7-98.1%)             |       |                             |                                                                                            |             |                                                                                      |                                 |                               |
|                                                                                                                         | ≥28 days: 88.7% (17.9-99.5%)                |       |                             |                                                                                            |             |                                                                                      |                                 |                               |
| Death                                                                                                                   | 14-27 days: 48.9% (-92.3-92.5%)             |       |                             |                                                                                            |             |                                                                                      |                                 |                               |
|                                                                                                                         | ≥28 days: 90.5% (31.5-99.6%)                |       |                             |                                                                                            |             |                                                                                      |                                 |                               |

|                                   |                                                                                                               |                              |                                     |                                   |                                  |                                                                                                           |                              |                             |  |
|-----------------------------------|---------------------------------------------------------------------------------------------------------------|------------------------------|-------------------------------------|-----------------------------------|----------------------------------|-----------------------------------------------------------------------------------------------------------|------------------------------|-----------------------------|--|
|                                   |                                                                                                               | (298)                        | Retrospective case-control          | 27/2/2021 to 14/4/2021 US.        | 126,572                          | Symptomatic infection                                                                                     | ≥1 day: 50.6% (14.0-74.0%)   |                             |  |
|                                   |                                                                                                               |                              |                                     |                                   |                                  |                                                                                                           | ≥8 days: 65.5% (23.3-87.5%)  |                             |  |
|                                   |                                                                                                               |                              |                                     |                                   |                                  |                                                                                                           | ≥15 days: 76.7% (30.3-95.3%) |                             |  |
|                                   |                                                                                                               | (299)                        | Test-negative case-control          | 1/7/2021 to 31/7/2021 US.         | 1,000                            | Symptomatic infection                                                                                     | 51% (95% CI: -2-76%)         |                             |  |
|                                   |                                                                                                               | (256)                        | Observational                       | 14/12/2020 to 14/8/2021 US.       | Delta: 2,840<br>Pre-Delta: 7,012 | Infection – Delta                                                                                         | 14–119 days: 85% (68-93%)    |                             |  |
|                                   |                                                                                                               |                              |                                     |                                   |                                  |                                                                                                           | 120–149 days: 81% (34-95%)   |                             |  |
|                                   |                                                                                                               |                              |                                     |                                   |                                  |                                                                                                           | ≥150 days: 73% (49-86%)      |                             |  |
|                                   |                                                                                                               |                              |                                     |                                   |                                  | Infection – Pre-Delta                                                                                     | 91% (81-96%)                 |                             |  |
|                                   |                                                                                                               |                              |                                     |                                   |                                  | [NOTE: 2% of study participants received Ad26.COV2.S (65% received BNT162b2, and 33% received mRNA-1273)] |                              |                             |  |
|                                   |                                                                                                               | (300)                        | Cohort                              | March to July 2021 US.            | 1,914,670                        | Infection                                                                                                 | 79% (77-80%)                 |                             |  |
|                                   |                                                                                                               |                              |                                     | Hospitalisation                   | 81% (79-84%)                     |                                                                                                           |                              |                             |  |
| (301)                             | Retrospective cohort                                                                                          | 27/2/2021 to 22/7/2021 US.   | 97,787                              | Infection                         | ≥1 day: 73.6% (65.9-79.9%)       |                                                                                                           |                              |                             |  |
|                                   |                                                                                                               |                              |                                     |                                   | ≥8 days: 72.9% (64.2-79.9%)      |                                                                                                           |                              |                             |  |
|                                   |                                                                                                               |                              |                                     |                                   | ≥15 days: 74.2% (64.9-81.6%)     |                                                                                                           |                              |                             |  |
| (282)                             | Prospective cohort                                                                                            | 1/5/2021 to 3/9/2021 US.     | 8,690,825                           | Infection - 18-49 years old       |                                  | ≥14 days: 89% (86.5-91.5%)                                                                                |                              |                             |  |
|                                   |                                                                                                               |                              |                                     | Infection - 50-64 years old       |                                  | ≥14 days: 86.1% (82.5-89.6%)                                                                              |                              |                             |  |
|                                   |                                                                                                               |                              |                                     | Infection - ≤65 years old         |                                  | ≥14 days: 80.8% (75.2-86.5%)                                                                              |                              |                             |  |
|                                   |                                                                                                               |                              |                                     | Hospitalisation - 18-49 years old |                                  | ≥14 days: 95.7% (91.1-98.3%)                                                                              |                              |                             |  |
|                                   |                                                                                                               |                              |                                     | Hospitalisation - 50-64 years old |                                  | ≥14 days: 87.5% (82.4-91.4%)                                                                              |                              |                             |  |
|                                   |                                                                                                               |                              |                                     | Hospitalisation - ≤65 years old   |                                  | ≥14 days: 85.2% (81.1-88.6%)                                                                              |                              |                             |  |
| <b>Moderna (mRNA-1273) - mRNA</b> | Two doses (100µg, 0.5ml each) intramuscularly (deltoid) with a recommended interval of 28 days between doses. | (245)                        | Test-negative case-control          | 14/12/2020 to 3/8/2021 Canada.    | 682,071                          | Symptomatic infection – Alpha                                                                             | ≥14 days: 83% (80-86%)       | ≥7 days: 92% (86-96%)       |  |
|                                   |                                                                                                               |                              |                                     |                                   |                                  | Symptomatic infection – Beta or Gamma                                                                     | ≥14 days: 77% (63-86%)       |                             |  |
|                                   |                                                                                                               |                              |                                     |                                   |                                  | Symptomatic infection – Delta                                                                             | ≥14 days: 72% (57-82%)       |                             |  |
|                                   |                                                                                                               |                              |                                     |                                   |                                  | Hospitalisation - Alpha                                                                                   | ≥14 days: 79% (74-83%)       | ≥7 days: 94% (89-97%)       |  |
|                                   |                                                                                                               |                              |                                     |                                   |                                  | Hospitalisation – Beta or Gamma                                                                           | ≥14 days: 89% (73-95%)       |                             |  |
|                                   |                                                                                                               |                              |                                     |                                   |                                  | Hospitalisation - Delta                                                                                   | ≥14 days: 96% (72-99%)       |                             |  |
|                                   |                                                                                                               | (246)                        | Retrospective case-control          | January to July 2021 US.          | 60,083                           | Infection                                                                                                 |                              | ≥14 days: 86% (81-90.6%)    |  |
|                                   |                                                                                                               |                              |                                     |                                   |                                  | Hospitalisation                                                                                           |                              | ≥14 days: 91.6% (81-97%)    |  |
|                                   |                                                                                                               |                              |                                     |                                   |                                  | Admission to an ICU                                                                                       |                              | ≥14 days: 93.3% (57-99.8%)  |  |
|                                   |                                                                                                               | (250)                        | Test-negative case-control          | 17/1/2021 to 5/6/2021 Canada.     | 5,8476                           | Infection                                                                                                 | ≥14 days: 68.7% (59.5-75.9%) | ≥7 days: 84.1% (34.9-96.1%) |  |
| (252)                             | Test-negative case-control                                                                                    | 23/3/2021 to 7/9/2021 Qatar. | 1 dose: 490,828<br>2 doses: 409,041 | Infection - Delta                 | ≥14 days: 79.7% (60.8-89.5%)     | ≥14 days: 86.1% (78.0-91.3%)                                                                              |                              |                             |  |
| (255)                             | Observational                                                                                                 | 1/3/2021 to 1/8/2021         | 10,428,783                          | Infection – Pre-Delta period      |                                  | ≥14 days: 74.7% (66.2-81.1%)                                                                              |                              |                             |  |
|                                   |                                                                                                               |                              |                                     | Infection – Intermediate period   |                                  | ≥14 days: 70.4% (60.1-78.0%)                                                                              |                              |                             |  |

|                                          |                                |                                                                                                            |                             |                                         |                                                                 |                                     |                                                                 |                                |  |
|------------------------------------------|--------------------------------|------------------------------------------------------------------------------------------------------------|-----------------------------|-----------------------------------------|-----------------------------------------------------------------|-------------------------------------|-----------------------------------------------------------------|--------------------------------|--|
|                                          |                                | (256)                                                                                                      | Observational               | US.<br>14/12/2020 to 14/8/2021<br>US.   | Delta:<br>2,840<br>Pre-Delta:<br>7,012                          | Infection – Delta                   | ≥14 days: 50.6% (45.0-55.7%)                                    |                                |  |
|                                          |                                |                                                                                                            |                             |                                         |                                                                 | Infection – Delta                   | 14–119 days: 85% (68-93%)                                       |                                |  |
|                                          |                                |                                                                                                            |                             |                                         |                                                                 |                                     | 120–149 days: 81% (34-95%)                                      |                                |  |
|                                          |                                |                                                                                                            |                             |                                         |                                                                 |                                     | ≥150 days: 73% (49-86%)                                         |                                |  |
|                                          |                                |                                                                                                            |                             |                                         |                                                                 | Infection – Pre-Delta               | 91% (81-96%)                                                    |                                |  |
|                                          |                                | [NOTE: 33% of study participants received mRNA-1273 (2% received Ad26.COVID.S, and 65% received BNT162b2)] |                             |                                         |                                                                 |                                     |                                                                 |                                |  |
|                                          |                                | (258)                                                                                                      | Observational               | 1/12/2020 to 1/8/2021<br>UK.            | 384,543                                                         | Infection - Delta                   | 75% (64-83%)                                                    |                                |  |
|                                          |                                | (259)                                                                                                      | Observational               | April to May 2021.<br>Canada            | 124                                                             | Infection                           | 52.5% (26.9-69.1%)                                              |                                |  |
|                                          |                                |                                                                                                            |                             |                                         |                                                                 | Symptomatic infection               | 65.6% (33.8-82.1%)                                              |                                |  |
|                                          |                                |                                                                                                            |                             |                                         |                                                                 | Severe infection                    | 78.6% (47.9-91.2%)                                              |                                |  |
|                                          |                                | (272)                                                                                                      | Retrospective cohort        | 1/1/2021 to 31/3/2021<br>US.            | 4,722                                                           | Infection                           | >14 days after first, ≤14 days after second: 91.2% (80.6-96.1%) |                                |  |
|                                          |                                |                                                                                                            |                             |                                         |                                                                 |                                     | >14 days: 98.6% (90.1-99.8%)                                    |                                |  |
|                                          |                                | (273)                                                                                                      | Prospective cohort          | 14/12/2020 to 10/4/2021<br>US.          | 3,975                                                           | Infection                           | ≥14 days after first, <14 days after second: 83% (40-95%)       |                                |  |
|                                          |                                |                                                                                                            |                             |                                         |                                                                 |                                     | ≥14 days: 82% (20-96%)                                          |                                |  |
|                                          |                                | (177)                                                                                                      | Randomised controlled trial | 27/7/2020 to 23/10/2020<br>US.          | 30,420                                                          | Infection                           | ≥14 days: 94.1% (89.3-96.8%)                                    |                                |  |
|                                          |                                |                                                                                                            |                             |                                         |                                                                 | Infection - ≥18 to <65 years of age | ≥14 days: 95.6% (90.6-97.9%)                                    |                                |  |
|                                          |                                |                                                                                                            |                             |                                         |                                                                 | Infection - ≥65 years of age        | ≥14 days: 86.4% (61.4-95.2%)                                    |                                |  |
|                                          |                                | (302)                                                                                                      | Retrospective cohort        | 16/7/2021 to 15/8/2021<br>US.           | 827                                                             | Infection                           | ≥14 days: 56.6% (42.0-67.5%)                                    |                                |  |
|                                          |                                |                                                                                                            |                             |                                         |                                                                 | Symptomatic infection               | ≥14 days: 84.2% (56.4-94.3%)                                    |                                |  |
|                                          |                                | (303)                                                                                                      | Retrospective cohort        | 22/12/2020 to 2/2/2021<br>US.           | 4,028                                                           | Infection                           | 8-42 days: 77.5% (61.2-87%)                                     |                                |  |
|                                          |                                |                                                                                                            |                             |                                         |                                                                 |                                     | 15-42 days: 95% (86-98.2%)                                      |                                |  |
|                                          |                                | (304)                                                                                                      | Test negative case-control  | 28/10/2020 to 10/5/2021<br>Qatar.       | 256,037                                                         | Infection – Alpha                   | 0-6 days: 2.4% (0-21.7%)                                        | 0-6 days: 98.0% (94.7-99.5%)   |  |
|                                          |                                |                                                                                                            |                             |                                         |                                                                 |                                     | 7-13 days: 0.0% (0.0-11.9%)                                     | 7-13 days: 99.2% (95.3-100.0%) |  |
|                                          |                                |                                                                                                            |                             |                                         |                                                                 |                                     | 14-20 days: 81.6% (73.1-87.8%)                                  |                                |  |
|                                          |                                |                                                                                                            |                             |                                         |                                                                 |                                     | 21-27 days: 94.4% (89.1-97.5%)                                  |                                |  |
| Infection - Beta                         | 0-6 days: 4.2% (0-15.1%)       |                                                                                                            |                             |                                         |                                                                 | 0-6 days: 94.2% (92.1-95.9%)        |                                                                 |                                |  |
|                                          | 7-13 days: 0.0% (0.0-0.0%)     |                                                                                                            |                             |                                         |                                                                 | 7-13 days: 96.4% (94.3-97.9%)       |                                                                 |                                |  |
|                                          | 14-20 days: 47.9% (39.5-55.2%) |                                                                                                            |                             |                                         |                                                                 |                                     |                                                                 |                                |  |
|                                          | 21-27 days: 73.7% (67.6-78.8%) |                                                                                                            |                             |                                         |                                                                 |                                     |                                                                 |                                |  |
| Any severe, critical, or fatal infection | 0-6 days: 18.7% (0-44.7%)      |                                                                                                            |                             |                                         |                                                                 | 0-6 days: 100.0% (93.9-100.0%)      |                                                                 |                                |  |
|                                          | 7-13 days: 0.0% (0.0-10.1%)    |                                                                                                            |                             |                                         |                                                                 | 7-13 days: 100.0% (86.9-100.0%)     |                                                                 |                                |  |
|                                          | 14-20 days: 70.3% (48.9-83.5%) |                                                                                                            |                             |                                         |                                                                 |                                     |                                                                 |                                |  |
|                                          | 21-27 days: 92.1% (78.4-97.9%) |                                                                                                            |                             |                                         |                                                                 |                                     |                                                                 |                                |  |
| (305)                                    | Retrospective cohort           | 27/4/2021 to 6/6/2021                                                                                      | 1,945                       | Symptomatic infection - Mesa County, US | (36% fully vaccinated) Crude vaccine effectiveness 78% (71-84%) |                                     |                                                                 |                                |  |

|                                                                                               |                                                                                                   |       |                             |                               |                                 |                                                                                                  |                                                                                                    |                               |                              |
|-----------------------------------------------------------------------------------------------|---------------------------------------------------------------------------------------------------|-------|-----------------------------|-------------------------------|---------------------------------|--------------------------------------------------------------------------------------------------|----------------------------------------------------------------------------------------------------|-------------------------------|------------------------------|
|                                                                                               |                                                                                                   |       |                             | US.                           |                                 | Symptomatic infection - Other Colorado counties, US                                              | (44% fully vaccinated) Crude vaccine effectiveness 89% (88-91%)                                    |                               |                              |
|                                                                                               |                                                                                                   | (306) | Prospective cohort          | 18/12/2020 to 31/03/2021 US.  | 705,756                         | Infection                                                                                        |                                                                                                    | 87.4% (85.6-89.1%)            |                              |
|                                                                                               |                                                                                                   |       |                             |                               |                                 | Hospitalisation                                                                                  |                                                                                                    | 95.8% (92.5-97.6%)            |                              |
|                                                                                               |                                                                                                   |       |                             |                               |                                 | Hospital death                                                                                   |                                                                                                    | 97.9% (84.5-99.7%)            |                              |
|                                                                                               |                                                                                                   | (307) | Test-negative case control  | 1/3/2021 to 27/7/2021 US.     | 8153 cases and matched controls | Infection - Alpha                                                                                | ≥14 days: 90.1 (82.9 to 94.2)                                                                      | ≥14 days: 98.4 (96.9 to 99.1) |                              |
|                                                                                               |                                                                                                   |       |                             |                               |                                 | Infection - Delta                                                                                | ≥14 days: 77.0% (60.7-86.5%)                                                                       | ≥14 days: 86.7% (84.3-88.7%)  |                              |
|                                                                                               |                                                                                                   |       |                             |                               |                                 | Infection - Epsilon                                                                              | ≥14 days: 76.3% (48.1-89.1%)                                                                       | ≥14 days: 97.6% (90.2-99.4%)  |                              |
|                                                                                               |                                                                                                   |       |                             |                               |                                 | Infection - Gamma                                                                                | ≥14 days: 74.2% (43.8-88.1%)                                                                       | ≥14 days: 95.5% (90.9-97.8%)  |                              |
|                                                                                               |                                                                                                   |       |                             |                               |                                 | Infection - Iota                                                                                 | ≥14 days: 88.8% (0.7-98.7%)                                                                        | ≥14 days: 95.7% (81.7-99.0%)  |                              |
|                                                                                               |                                                                                                   |       |                             |                               |                                 | Infection - Mu                                                                                   | ≥14 days: 45.8% (0.0-88.9%)                                                                        | ≥14 days: 90.4% (73.9-96.5%)  |                              |
|                                                                                               |                                                                                                   |       |                             |                               |                                 | Infection - Other                                                                                | ≥14 days: 84.3% (65.9-92.7%)                                                                       | ≥14 days: 96.4% (91.2-98.5%)  |                              |
|                                                                                               |                                                                                                   |       |                             |                               |                                 | Infection - Unidentified                                                                         | ≥14 days: 67.6% (57.1-75.6%)                                                                       | ≥14 days: 79.9% (76.9-82.5%)  |                              |
|                                                                                               |                                                                                                   | (278) | Test-negative case-control  | January to March 2021 US.     | 1,843                           | Infection                                                                                        | ≥14 days: 81.7% (74.3-86.9%)                                                                       | ≤2 days: 81.7% (74.3-86.9%)   |                              |
|                                                                                               |                                                                                                   |       |                             |                               |                                 |                                                                                                  |                                                                                                    | 3-6 days: 81.7% (74.3-86.9%)  |                              |
|                                                                                               |                                                                                                   |       |                             |                               |                                 |                                                                                                  |                                                                                                    | ≥7 days: 93.5% (86.5-96.9%)   |                              |
|                                                                                               |                                                                                                   |       |                             |                               |                                 | [NOTE: 24% of case-patients and 22% of controls received mRNA-1273, remainder received BNT162b2] |                                                                                                    |                               |                              |
|                                                                                               |                                                                                                   | (282) | Prospective cohort          | 1/5/2021 to 3/9/2021 US.      | 8,690,825                       | Infection - 18-49 years old                                                                      |                                                                                                    | ≥14 days: 96.3% (95.4-97.2%)  |                              |
|                                                                                               |                                                                                                   |       |                             |                               |                                 | Infection - 50-64 years old                                                                      |                                                                                                    | ≥14 days: 97.3% (96.4-98.1%)  |                              |
|                                                                                               |                                                                                                   |       |                             |                               |                                 | Infection - ≤65 years old                                                                        |                                                                                                    | ≥14 days: 96.0% (95.1-96.9%)  |                              |
|                                                                                               |                                                                                                   |       |                             |                               |                                 | Hospitalisation - 18-49 years old                                                                |                                                                                                    | ≥14 days: 96.6% (94.3-98.1%)  |                              |
|                                                                                               |                                                                                                   |       |                             |                               |                                 | Hospitalisation - 50-64 years old                                                                |                                                                                                    | ≥14 days: 97.3% (95.9-98.2%)  |                              |
|                                                                                               |                                                                                                   |       |                             |                               |                                 | Hospitalisation - ≤65 years old                                                                  |                                                                                                    | ≥14 days: 97.1% (96.5-97.6%)  |                              |
|                                                                                               |                                                                                                   | (308) | Randomised controlled trial | 27/7/2020 to 23/10/2020 US.   | 30,415                          | Asymptomatic infection                                                                           |                                                                                                    | 63.0% (56.6-68.5%)            |                              |
|                                                                                               |                                                                                                   |       |                             |                               |                                 | Symptomatic infection                                                                            |                                                                                                    | 93.2% (91.0-94.8%)            |                              |
|                                                                                               |                                                                                                   |       |                             |                               |                                 | Severe infection                                                                                 |                                                                                                    | 98.2% (92.8-99.6%)            |                              |
|                                                                                               |                                                                                                   |       |                             |                               |                                 | Death                                                                                            |                                                                                                    | 100.0% (NE-100.0%)            |                              |
| <b>Sinopharm BBIBP-CorV</b> - Aluminium-hydroxide-adjuvanted, inactivated whole virus vaccine | Two doses (0.5ml) intramuscularly (deltoid) with a recommended interval of 3 weeks between doses. | (309) | Test-negative case-control  | 18/5/2021 to 20/6/2021 China. | 366                             | Infection                                                                                        | 13.8% (-60.2-54.8%)                                                                                | 59.0% (16.0-81.6%)            |                              |
|                                                                                               |                                                                                                   |       |                             |                               |                                 |                                                                                                  | Moderately severe infection                                                                        |                               | 70.2% (29.6-89.3%)           |
|                                                                                               |                                                                                                   |       |                             |                               |                                 |                                                                                                  | [NOTE: 27.5% of study participants were vaccinated with Sinopharm BIBP (61.3% received CoronaVac)] |                               |                              |
|                                                                                               |                                                                                                   | (310) | Retrospective cohort        | May to June 2021 China.       | 10,813                          | Infection with Pneumonia - Delta                                                                 | 8.4% (-47.6-64.4%)                                                                                 | 69.5% (42.8-96.3%)            |                              |
|                                                                                               |                                                                                                   |       |                             |                               |                                 |                                                                                                  | Severe/critical disease -Delta                                                                     | 100% (NA)                     | 100% (NA)                    |
|                                                                                               |                                                                                                   | (311) | Retrospective cohort        | 9/2/2021 to 30/6/2021 Peru.   | 606,772                         | Infection                                                                                        | ≥14 days: 15.3 (12.7 to 17.8)                                                                      | ≥14 days: 49.2 (47.9 to 50.4) |                              |
|                                                                                               |                                                                                                   |       |                             |                               |                                 |                                                                                                  | COVID-19 mortality                                                                                 | ≥14 days: 45.2% (28.8-57.8%)  | ≥14 days: 93.9% (90.9-95.9%) |
|                                                                                               |                                                                                                   |       |                             |                               |                                 |                                                                                                  | Infection - ≥60 years old                                                                          | ≥14 days: 14.1% (5.2-22.2%)   | ≥14 days: 54.7% (50.7-58.3%) |
|                                                                                               |                                                                                                   |       |                             |                               |                                 | COVID-19 mortality - ≥60 years old                                                               | ≥14 days: 25.5% (-10.2-49.7%)                                                                      | ≥14 days: 90.6% (83.8-94.5%)  |                              |
|                                                                                               |                                                                                                   | (312) | Randomised controlled       | 16/7/2020 to 20/12/2020       | 40,382                          | Infection                                                                                        |                                                                                                    | ≥14 days: 73.5% (60.6-82.2%)  |                              |
|                                                                                               |                                                                                                   |       |                             |                               |                                 | Symptomatic infection                                                                            |                                                                                                    | ≥14 days: 78.1% (64.8-86.3%)  |                              |

|                                                                                            |                                                                                                 |                                |                            |                                        |                                 |                                                                                                    |                                  |                                  |  |
|--------------------------------------------------------------------------------------------|-------------------------------------------------------------------------------------------------|--------------------------------|----------------------------|----------------------------------------|---------------------------------|----------------------------------------------------------------------------------------------------|----------------------------------|----------------------------------|--|
|                                                                                            |                                                                                                 |                                | trial                      | UAE, Bahrain.                          |                                 | Severe infection                                                                                   |                                  | ≥14 days: 100% (NA)              |  |
|                                                                                            |                                                                                                 | (313)                          | Retrospective cohort       | 1/9/2020 to 1/5/2021 UAE.              | 176,640                         | Hospitalisation                                                                                    | -20% (-28.6-11.8%)               | 79.8% (78-81.4%)                 |  |
|                                                                                            |                                                                                                 |                                |                            |                                        |                                 | Critical care admission                                                                            | 3.7% (-12.8-18.1%)               | 92.2% (89.7-94.1%)               |  |
|                                                                                            |                                                                                                 |                                |                            |                                        |                                 | Death                                                                                              | 27.9% (-61-72.6%)                | 97.1% (83-99.9%)                 |  |
|                                                                                            |                                                                                                 | (314)                          | Observational              | 9/12/2020 to 17/7/2021 Bahrain.        | 569,054                         | Symptomatic infection                                                                              |                                  | 45.5%                            |  |
|                                                                                            |                                                                                                 |                                |                            |                                        |                                 | Hospitalisation                                                                                    |                                  | 44.5%                            |  |
|                                                                                            |                                                                                                 |                                |                            |                                        |                                 | Hospitalisation - >50 years old                                                                    |                                  | 72%                              |  |
|                                                                                            |                                                                                                 |                                |                            |                                        |                                 | Death                                                                                              |                                  | 63%                              |  |
| <b>Sinovac-CoronaVac</b> - Aluminium-hydroxide-adjuvanted, inactivated whole virus vaccine | Two doses (0.5ml) intramuscularly (deltoid) with a recommended interval window of 2 to 4 weeks. | (309)                          | Test-negative case-control | 18/5/2021 to 20/6/2021 China.          | 366                             | Infection                                                                                          | 13.8% (-60.2-54.8%)              | 59.0% (16.0-81.6%)               |  |
|                                                                                            |                                                                                                 |                                |                            |                                        |                                 | Moderately severe infection                                                                        |                                  | 70.2% (29.6-89.3%)               |  |
|                                                                                            |                                                                                                 |                                |                            |                                        |                                 | [NOTE: 61.3% of study participants were vaccinated with CoronaVac (27.5% recieved Sinopharm BIBP)] |                                  |                                  |  |
|                                                                                            |                                                                                                 | (315)                          | Observational              | 2/2/2021 to 1/5/2021 Chile.            | 10,187, 720                     | Infection                                                                                          | 17.2% (15.8-18.6%)               | 63.7% (62.8-64.6%)               |  |
|                                                                                            |                                                                                                 |                                |                            |                                        |                                 | Hospitalisation                                                                                    | 40.3% (37.6-42.8%)               | 86.5% (85.6-87.4%)               |  |
|                                                                                            |                                                                                                 |                                |                            |                                        |                                 | Admission to an ICU                                                                                | 45.3% (41.2-49.2%)               | 90.2% (88.9-91.4%)               |  |
|                                                                                            |                                                                                                 |                                |                            |                                        |                                 | Death                                                                                              | 46.0% (40.7-50.8%)               | 86.7% (84.9-88.3%)               |  |
|                                                                                            |                                                                                                 | (316)                          | Test-negative case-control | 17/1/2021 to 29/4/2021 Brazil.         | 43,774                          | Symptomatic infection - Gamma                                                                      | 0-13 days: -0.8% (-9.4 to 7.2%)  | 0-13 days: 24.7% (14.7 to 33.4%) |  |
|                                                                                            |                                                                                                 |                                |                            |                                        |                                 |                                                                                                    | ≥14 days: 12.5% (3.7 to 20.6%)   | ≥14 days: 46.8% (38.7 to 53.8%)  |  |
|                                                                                            |                                                                                                 |                                |                            |                                        |                                 | Hospitalisation - Gamma                                                                            | 0-13 days: 6.6% (-4.3 to 16.3%)  | 0-13 days: 39.1% (28.0 to 48.5%) |  |
|                                                                                            |                                                                                                 |                                |                            |                                        |                                 |                                                                                                    | ≥14 days: 16.9% (5.7 to 26.8%)   | ≥14 days: 55.5% (46.5 to 62.9%)  |  |
|                                                                                            |                                                                                                 |                                |                            |                                        |                                 | Death - Gamma                                                                                      | 0-13 days: 13.1% (-1.5 to 25.6%) | 0-13 days: 48.9% (34.4 to 60.1%) |  |
|                                                                                            |                                                                                                 |                                |                            |                                        |                                 |                                                                                                    | ≥14 days: 31.2% (17.6 to 42.5%)  | ≥14 days: 61.2% (48.9 to 70.5%)  |  |
|                                                                                            |                                                                                                 | (317)                          | Test-negative case-control | 19/1/2021 to 13/4/2021 Brazil.         | 53,153                          | Infection – Gamma                                                                                  | ≥14 days: 49.4% 13.2-71.9%       | ≥14 days: 37.1% (-53.3-74.2%)    |  |
|                                                                                            |                                                                                                 |                                |                            |                                        |                                 | Infection                                                                                          | ≥14 days: 35.1% (-6.6-60.5%)     | 37.9% (-46.4-73.6%)              |  |
|                                                                                            |                                                                                                 | (115)                          | Prospective cohort         | February to March 2021 Brazil.         | 20,187                          | Infection                                                                                          |                                  | ≥14 days: 50.7% (33.3-62.5%)     |  |
|                                                                                            |                                                                                                 |                                |                            |                                        |                                 |                                                                                                    |                                  | ≥21 days: 51.8% (30-66.0%)       |  |
|                                                                                            |                                                                                                 |                                |                            |                                        |                                 | ≥28 days: 68.4% (51-80.8%)                                                                         |                                  |                                  |  |
|                                                                                            |                                                                                                 |                                |                            |                                        |                                 | ≥35 days: 73.8% (57-84.8%)                                                                         |                                  |                                  |  |
| (318)                                                                                      | Test-negative case-control                                                                      | 15/3/2021 to 3/10/2021 Brazil. | 19,838                     | Symptomatic infection – Pregnant women | ≥14 days: 5.02% (-18.22-23.69%) | ≥14 days: 40.97% (27.07-52.22%)                                                                    |                                  |                                  |  |
|                                                                                            |                                                                                                 |                                |                            | Severe infection – Pregnant women      | ≥14 days: 67.74% (20-87%)       | ≥14 days: 85.39% (59.44-94.80%)                                                                    |                                  |                                  |  |
| (319)                                                                                      | Test-negative case-control                                                                      | 19/1/2021 to 25/3/2021 Brazil. | 2,656                      | Symptomatic infection – Gamma          | ≥14 days: 49.6% (11.3-71.4%)    |                                                                                                    |                                  |                                  |  |
|                                                                                            |                                                                                                 |                                |                            | Symptomatic infection                  | ≥14 days: 35.1% (-6.6-60.5%)    |                                                                                                    |                                  |                                  |  |
| (320)                                                                                      | Randomised controlled trial                                                                     | 14/9/2020 to 5/1/2021 Turkey.  | 10,029                     | Symptomatic infection                  | 14-27 days: 46.4% (0.4-71.2%)   | ≥14 days: 83.5% (65.4-92.1%)                                                                       |                                  |                                  |  |
|                                                                                            |                                                                                                 |                                |                            | Hospitalisation                        |                                 | ≥14 days: 100% (20.4-100%)                                                                         |                                  |                                  |  |

|                                                                   |                                                                                            |                                                          |                              |                                 |                              |                                                                                  |                                |                              |
|-------------------------------------------------------------------|--------------------------------------------------------------------------------------------|----------------------------------------------------------|------------------------------|---------------------------------|------------------------------|----------------------------------------------------------------------------------|--------------------------------|------------------------------|
|                                                                   |                                                                                            | (321)                                                    | Randomised controlled trial  | 21/7/2020 to 16/12/2020 Brazil. | 9,823                        | Infection                                                                        | ≤14 days: -3.3% (-4.8- -1.9%)  | ≥14 days: 50.7% (35.9-62%)   |
|                                                                   |                                                                                            |                                                          |                              |                                 |                              |                                                                                  | 14-28 days: 94.0% (55.1-99.2%) |                              |
|                                                                   |                                                                                            |                                                          |                              |                                 |                              |                                                                                  | ≤28 days: 42.5% (32.9-50.7%)   |                              |
|                                                                   |                                                                                            |                                                          |                              |                                 |                              |                                                                                  | ≤42 days: 56.5% (49.6-62.5%)   |                              |
|                                                                   |                                                                                            |                                                          |                              |                                 |                              |                                                                                  | ≤56 days: 60.4% (56.5-63.9%)   |                              |
|                                                                   |                                                                                            |                                                          |                              |                                 |                              |                                                                                  | ≤70 days: 54.7% (53.2-56.1%)   |                              |
|                                                                   |                                                                                            |                                                          |                              |                                 |                              |                                                                                  | ≤84 days: 53.7% (52.7-54.7%)   |                              |
|                                                                   |                                                                                            |                                                          |                              |                                 |                              |                                                                                  | ≤98 days: 52.5% (51.9-53.1%)   |                              |
|                                                                   |                                                                                            | Infection requiring medical assistance (hospitalisation) | ≥14 days: 83.7% (58.0-93.7%) |                                 |                              |                                                                                  |                                |                              |
|                                                                   |                                                                                            | Moderate infection                                       | ≥14 days: 100% (56.4-100%)   |                                 |                              |                                                                                  |                                |                              |
|                                                                   |                                                                                            | Severe infection or death                                | ≥14 days: 100% (16.9-100%)   |                                 |                              |                                                                                  |                                |                              |
|                                                                   |                                                                                            | Infection - <21 days between 2 doses                     | ≥14 days: 49.1% (33-61.4%)   |                                 |                              |                                                                                  |                                |                              |
|                                                                   |                                                                                            | Infection - ≥21 days between 2 doses                     | ≥14 days: 62.3% (13.9-83.5%) |                                 |                              |                                                                                  |                                |                              |
|                                                                   |                                                                                            | (295)                                                    | Cohort                       | 17/1/2021 to 11/5/2021 Brazil.  | 313,328                      | Death                                                                            | ≥21 days: 95.1% (94.7-95.5%)   | ≥21 days: 99.1% (98.9-99.3%) |
| Death – 75-79 years old                                           | ≥21 days: 86.3% (84.7-87.7%)                                                               |                                                          |                              |                                 |                              |                                                                                  |                                |                              |
| Death – 80-89 years old                                           | ≥21 days: 97.6% (97.2-97.9%)                                                               |                                                          |                              |                                 |                              |                                                                                  |                                |                              |
| Death - ≥90 years old                                             | ≥21 days: 99.3% (99.1-99.5%)                                                               |                                                          |                              |                                 |                              |                                                                                  |                                |                              |
| (296)                                                             | Retrospective cohort                                                                       | 18/1/2021 to 30/6/2021 Brazil                            | 60,577, 870                  | Infection                       | ≥14 days: 16.4% (15.2-17.5%) | 0-13 days: 40.3% (39.4-41.2%)                                                    |                                |                              |
|                                                                   |                                                                                            |                                                          |                              |                                 | ≥14 days: 54.2% (53.4-55.0%) |                                                                                  |                                |                              |
|                                                                   |                                                                                            |                                                          |                              | Hospitalisation                 | ≥14 days: 26.6% (24.6-28.4%) | 0-13 days: 57.3% (56.0-58.6%)                                                    |                                |                              |
|                                                                   |                                                                                            |                                                          |                              |                                 | ≥14 days: 72.6% (71.6-73.6%) |                                                                                  |                                |                              |
|                                                                   |                                                                                            |                                                          |                              | ICU admission                   | ≥14 days: 28.1% (24.9-31.1%) | 0-13 days: 58.1% (55.9-60.1%)                                                    |                                |                              |
|                                                                   |                                                                                            |                                                          |                              |                                 | ≥14 days: 74.2% (72.6-75.7%) |                                                                                  |                                |                              |
|                                                                   |                                                                                            |                                                          |                              | Death                           | ≥14 days: 29.4% (26.7-32.0%) | 0-13 days: 58.7% (56.9-60.4%)                                                    |                                |                              |
|                                                                   |                                                                                            |                                                          |                              |                                 | ≥14 days: 74% (72.6-75.3%)   |                                                                                  |                                |                              |
| Bharat Biotech – Covaxin – whole virion inactivated virus vaccine | Two doses (0.5ml) intramuscularly (deltoid) with a recommended interval window of 28 days. | (322)                                                    | Randomised controlled trial  | 16/11/2020 to 7/1/2021 India.   | 25 798                       | Symptomatic infection                                                            | ≥14 days: 77.8% (65.2-86.4%)   |                              |
|                                                                   |                                                                                            |                                                          |                              |                                 |                              | Severe disease                                                                   | ≥14 days: 93.4% (57.1-99.8%)   |                              |
|                                                                   |                                                                                            |                                                          |                              |                                 |                              | Symptomatic infection – 18-59 years old                                          | ≥14 days: 79.4% (66.0-88.2%)   |                              |
|                                                                   |                                                                                            |                                                          |                              |                                 |                              | Symptomatic infection - ≥60 years old                                            | ≥14 days: 67.8% (8.0-90.0%)    |                              |
|                                                                   |                                                                                            |                                                          |                              |                                 |                              | Symptomatic infection – participants with pre-existing chronic medical condition | ≥14 days: 66.2% (33.8-84.0%)   |                              |
|                                                                   |                                                                                            |                                                          |                              |                                 |                              | Asymptomatic infection                                                           | ≥14 days: 63.6% (29.0-82.4%)   |                              |
|                                                                   |                                                                                            | (323)                                                    | Test-negative case-control   | 15/4/2021 to 15/5/2021 India.   | 3,732                        | Symptomatic infection                                                            | <7 days: 40% (-21-71%)         | <14 days: 27% (-35-61%)      |
|                                                                   |                                                                                            |                                                          |                              |                                 |                              |                                                                                  | ≥7 days: 1% (-30-25%)          | ≥14 days: 50% (33-62%)       |
|                                                                   |                                                                                            |                                                          |                              |                                 |                              |                                                                                  | ≥21 days: -1% (-51-33%)        | ≥28 days: 46% (22-62%)       |
|                                                                   |                                                                                            | (293)                                                    | Cross-                       | 1/5/2021 to                     | 583                          | Infection                                                                        |                                | ≥42 days: 57% (21-76%)       |
|                                                                   |                                                                                            |                                                          |                              |                                 |                              |                                                                                  | <14 days: 15% (-68-57%)        | <14 days: 66% (34-81%)       |
|                                                                   |                                                                                            |                                                          |                              |                                 |                              |                                                                                  |                                |                              |

|                                                                                                                                                                                                   |                                                                                        |              |                                                                                      |                                       |                              |                                      |                                                 |                             |                              |  |  |
|---------------------------------------------------------------------------------------------------------------------------------------------------------------------------------------------------|----------------------------------------------------------------------------------------|--------------|--------------------------------------------------------------------------------------|---------------------------------------|------------------------------|--------------------------------------|-------------------------------------------------|-----------------------------|------------------------------|--|--|
|                                                                                                                                                                                                   |                                                                                        |              | sectional observational                                                              | 31/5/2021 India.                      |                              |                                      | ≥14 days: 44% (7-66%)                           | ≥14 days: 83% (73-89%)      |                              |  |  |
|                                                                                                                                                                                                   |                                                                                        |              |                                                                                      |                                       |                              | Hospitalisation                      | <14 days: 43% (-68-81%)                         | <14 days: 83% (17-96%)      |                              |  |  |
|                                                                                                                                                                                                   |                                                                                        |              |                                                                                      |                                       |                              |                                      | ≥14 days: 76% (21-92%)                          | ≥14 days: 88% (55-97%)      |                              |  |  |
|                                                                                                                                                                                                   |                                                                                        |              |                                                                                      |                                       |                              | ICU admission or death               | <14 days: 62% (-27-89%)                         | <14 days: 93% (35-99%)      |                              |  |  |
|                                                                                                                                                                                                   |                                                                                        |              | ≥14 days: 53% (9-29-83%)                                                             | ≥14 days: 93% (64-99%)                |                              |                                      |                                                 |                             |                              |  |  |
|                                                                                                                                                                                                   |                                                                                        |              | [NOTE: Participants either received Covaxin or Covishield (AZD1222)]                 |                                       |                              |                                      |                                                 |                             |                              |  |  |
|                                                                                                                                                                                                   |                                                                                        |              | (294)                                                                                | Retrospective cohort                  | 1/6/2020 to 31/5/2021 India. | 11,405                               | Infection (with evidence of prior infection)    |                             | ≥14 days: 91.1% (84.1-94.9%) |  |  |
|                                                                                                                                                                                                   |                                                                                        |              |                                                                                      |                                       |                              |                                      | Infection (without evidence of prior infection) |                             | ≥14 days: 31.8% (23.5-39.1%) |  |  |
|                                                                                                                                                                                                   |                                                                                        |              | [NOTE: 5.77% of participants received Covaxin, 94.23% received Covishield (AZD1222)] |                                       |                              |                                      |                                                 |                             |                              |  |  |
|                                                                                                                                                                                                   |                                                                                        |              | (324)                                                                                | Retrospective cohort                  | 3/3/2020 to 18/6/2021 India. | 15,244                               | Reinfection                                     |                             | 86% (77-92%)                 |  |  |
| Symptomatic reinfection                                                                                                                                                                           |                                                                                        | 87% (76-93%) |                                                                                      |                                       |                              |                                      |                                                 |                             |                              |  |  |
| Asymptomatic reinfection                                                                                                                                                                          |                                                                                        | 84% (47-95%) |                                                                                      |                                       |                              |                                      |                                                 |                             |                              |  |  |
| <b>Novavax – NVX-CoV2373 (Nuvaxovid) or Serum Institute of India – COVOVAX (Novavax formulation - recombinant SARS-CoV-2 S protein nanoparticle as a coformulation with the adjuvant Matrix-M</b> | Two doses (0.5 ml) intramuscularly (deltoid) with a recommended interval of 3-4 weeks. | (325)        | Randomised controlled trial                                                          | 28/9/2020 to 28/10/2020 UK.           | 14,039                       | Infection                            |                                                 | 89.7% (80.2-94.6%)          |                              |  |  |
|                                                                                                                                                                                                   |                                                                                        |              |                                                                                      |                                       |                              | Infection – 18 to 64 years old       |                                                 | 89.8% (79.7-95.5%)          |                              |  |  |
|                                                                                                                                                                                                   |                                                                                        |              |                                                                                      |                                       |                              | Infection – 65 to 84 years old       |                                                 | 88.9% (20.2-99.7%)          |                              |  |  |
|                                                                                                                                                                                                   |                                                                                        |              |                                                                                      |                                       |                              | Infection – Alpha                    |                                                 | 86.3% (71.3-93.5%)          |                              |  |  |
|                                                                                                                                                                                                   |                                                                                        |              |                                                                                      |                                       |                              | Infection – Non-Alpha                |                                                 | 96.4% (73.8-99.5%)          |                              |  |  |
|                                                                                                                                                                                                   |                                                                                        | (326)        | Randomised controlled trial                                                          | 27/12.2020 to 18/2/2021 US, Mexico.   | 29,949                       | Infection                            |                                                 | ≥7 days: 89.3% (81.6-93.8%) |                              |  |  |
|                                                                                                                                                                                                   |                                                                                        |              |                                                                                      |                                       |                              | Infection – COVID-19 high risk group |                                                 | ≥7 days: 91.0% (83.6-95.0%) |                              |  |  |
|                                                                                                                                                                                                   |                                                                                        | (327)        | Randomised controlled trial                                                          | 28/9/2020 to 28/10/2020 UK.           | 15,139                       | Infection                            |                                                 | 89.8% (79.7-95.5%)          |                              |  |  |
|                                                                                                                                                                                                   |                                                                                        |              |                                                                                      |                                       |                              | Infection – 18-64 years old          |                                                 | 87.5% (-0.2-98.4%)          |                              |  |  |
|                                                                                                                                                                                                   |                                                                                        | (328)        | Randomised controlled trial                                                          | 17/7/2020 to 25/11/2020 South Africa. | 2,684                        | Symptomatic infection                |                                                 | ≥7 days: 49.4% (6.1-72.8%)  |                              |  |  |
| Symptomatic infection – Beta                                                                                                                                                                      |                                                                                        |              |                                                                                      |                                       |                              | ≥7 days: 51.0% (-0.6-76.2%)          |                                                 |                             |                              |  |  |
